# Supplementary material for: The Early Stage of Bacterial Genome-Reductive Evolution in the Host
Source: PubMed Central journal article supplement (PMC2877748; doi:10.1371/journal.ppat.1000922), 2010-05-27
Supplement: ppat.1000922.s003.pdf [file ppat.1000922.s003.pdf]

Table S1. Comparison of *B. mallei* genomes with that of *B. pseudomallei* strain K96243

|                                            |  |
|--------------------------------------------|--|
| IS elements are highlighted in yellow      |  |
| Genomic deletions are highlighted in green |  |

| w numtags in Bp K   | IS element          | BRF | ATCC23344 |         | FMH     |         | JHU     |         | GB-8 horse 4 |         | ATCC 10399 |         | NCTC 10229 |         | NCTC 10247 |         | 2002721280 |         | SAVP1   |         | PRL-20  |         |
|---------------------|---------------------|-----|-----------|---------|---------|---------|---------|---------|--------------|---------|------------|---------|------------|---------|------------|---------|------------|---------|---------|---------|---------|---------|
|                     |                     |     | 5'-end    | 3'-end  | 5'-end  | 3'-end  | 5'-end  | 3'-end  | 5'-end       | 3'-end  | 5'-end     | 3'-end  | 5'-end     | 3'-end  | 5'-end     | 3'-end  | 5'-end     | 3'-end  | 5'-end  | 3'-end  | 5'-end  | 3'-end  |
| <b>Chromosome 1</b> |                     |     |           |         |         |         |         |         |              |         |            |         |            |         |            |         |            |         |         |         |         |         |
| 1                   | BPSL0001            | 1   | 3008497   | 3009609 | 2906416 | 2907528 | 2922158 | 2923270 | 2994742      | 2995854 | 3244191    | 3243079 | 1669406    | 1668294 | 2934607    | 2935719 | 2830401    | 2831513 | 3358492 | 3357380 | 3045976 | 3047088 |
| 2                   | BPSL0002            | 1   | 3007238   | 3008449 | 2905157 | 2906368 | 2920899 | 2922110 | 2993483      | 2994694 | 3245450    | 3244239 | 1670665    | 1669454 | 2933348    | 2934559 | 2829142    | 2830353 | 3359751 | 3358540 | 3044717 | 3045928 |
| 3                   | BPSL0003            | 1   | 3004445   | 3006496 | 2902364 | 2904415 | 2918106 | 2920157 | 2990690      | 2992741 | 3248243    | 3246192 | 1673458    | 1671407 | 2930555    | 2932606 | 2826349    | 2828400 | 3362535 | 3360493 | 3041933 | 3043975 |
| 4                   | BPSL0004            | 1   | 3004125   | 3003850 | 2902044 | 2901769 | 2917786 | 2917511 | 2990370      | 2990095 | 3248563    | 3248838 | 1673778    | 1674053 | 2930235    | 2929960 | 2826029    | 2825754 | 3362855 | 3363130 | 3041613 | 3041338 |
| 5                   |                     |     | 3002230   | 3003802 | 2900149 | 2901721 | 2915891 | 2917463 | 2988475      | 2990047 | 3248886    | 3250457 | 1674101    | 1675677 | 2928340    | 2929912 | 2824135    | 2825706 | 3363178 | 3364749 | 3039719 | 3041290 |
| 6                   | Chr1_1a_IS8ma2_A    |     | 3002230   | 3003802 | 2900149 | 2901721 | 2915891 | 2917463 | 2988475      | 2990047 | 3248886    | 3250457 | 1674101    | 1675677 | 2928340    | 2929912 | 2824135    | 2825706 | 3363178 | 3364749 | 3039719 | 3041290 |
| 6                   | Chr1_1b_IS8ma2_A    |     | 2879914   | 2881486 | 2776259 | 2777831 | 2791386 | 2792958 | 2866443      | 2868015 | 3029164    | 3030736 | 1930938    | 1932510 | 2622004    | 2623575 |            |         | 3479600 | 3481131 | 2896600 | 2898131 |
| 7                   | BPSL0005            | 2   | 2878493   | 2879830 | 2774838 | 2776175 | 2789965 | 2791302 | 2865022      | 2866359 | 3027743    | 3029080 | 1929517    | 1930854 | 2624996    | 2623659 | 2822714    | 2824051 | 3478179 | 3479516 | 2895179 | 2896516 |
| 8                   | BPSL0006            | 2   | 2877707   | 2878171 | 2774052 | 2774516 | 2789179 | 2789643 | 2864236      | 2864700 | 3026957    | 3027421 | 1928731    | 1929195 | 2625782    | 2625318 | 2821928    | 2822392 | 3477393 | 3477857 | 2894393 | 2894857 |
| 9                   | BPSL0007            | 2   | 2877309   | 2875039 | 2773654 | 2772416 | 2788781 | 2786511 | 2863838      | 2861568 | 3026559    | 3024289 | 1928333    | 1926063 | 2626180    | 2628450 | 2821530    | 2819260 | 3476995 | 3474725 | 2893995 | 2892760 |
| 10                  | BPSL0008            | 2   | 2875039   | 2873549 | 2770886 | 2769396 | 2786511 | 2785021 | 2861568      | 2860078 | 3024289    | 3022799 | 1926063    | 1924573 | 2628450    | 2629940 | 2819260    | 2817770 | 3474725 | 3473235 | 3030694 | 3029204 |
| 11                  | BPSL0009            | 2   | 2873541   | 2872327 | 2769388 | 2768174 | 2785013 | 2783799 | 2860070      | 2858856 | 3022791    | 3021577 | 1924565    | 1923351 | 2629948    | 2631162 | 2817762    | 2816548 | 3473227 | 3472013 | 3029196 | 3027982 |
| 12                  | BPSL0010            | 2   | 2871842   | 2872249 | 2767689 | 2768096 | 2783314 | 2783721 | 2858371      | 2858778 | 3021092    | 3021499 | 1922866    | 1923273 | 2631647    | 2631240 | 2816063    | 2816470 | 3471528 | 3471935 | 3027497 | 3027904 |
| 13                  | BPSL0011            | 2   | 2871694   | 2871245 | 2767541 | 2767092 | 2783166 | 2782717 | 2858223      | 2857774 | 3020944    | 3020495 | 1922718    | 1922269 | 2631795    | 2632244 | 2815915    | 2815466 | 3471380 | 3470931 | 3027349 | 3026900 |
| 14                  | BPSL0012            | 2   | 2871084   | 2870611 | 2766931 | 2766458 | 2782556 | 2782083 | 2857613      | 2857140 | 3020334    | 3019861 | 1922108    | 1921635 | 2632405    | 2632878 | 2815305    | 2814832 | 3470770 | 3470297 | 3026739 | 3026266 |
| 15                  | BPSL0013            | 2   | 2870605   | 2870204 | 2766452 | 2766051 | 2782077 | 2781676 | 2857134      | 2856733 | 3019855    | 3019454 | 1921629    | 1921228 | 2632884    | 2633285 | 2814826    | 2814425 | 3470291 | 3469890 | 3026260 | 3025859 |
| 16                  | BPSL0014            | 2   | 2870223   | 2869498 | 2766070 | 2765345 | 2781695 | 2780970 | 2856752      | 2856027 | 3019473    | 3018748 | 1921247    | 1920522 | 2633266    | 2633991 | 2814444    | 2813719 | 3469909 | 3469184 | 3025878 | 3025153 |
| 17                  | BPSL0015            | 2   | 2869313   | 2868246 | 2765120 | 2764053 | 2780785 | 2779718 | 2855842      | 2854775 | 3018563    | 3017496 | 1920337    | 1919270 | 2634176    | 2635243 | 2813534    | 2812467 | 3468999 | 3467932 | 3024968 | 3023901 |
| 18                  | BPSL0016            | 2   | 2868218   | 2866791 | 2764025 | 2763504 | 2779690 | 2778263 | 2854747      | 2853320 | 3017468    | 3016041 | 1919242    | 1917815 | 2635271    | 2636698 | 2812439    | 2811012 | 3467904 | 3466477 | 3023873 | 3022446 |
| 19                  | BPSL0017            | 2   | 2866791   | 2866288 | 2762160 | 2761657 | 2778263 | 2777760 | 2853320      | 2852817 | 3016041    | 3015538 | 1917815    | 1917312 | 2636698    | 2637201 | 2811012    | 2810509 | 3466477 | 3465974 | 3022446 | 3021943 |
| 20                  | BPSL0018            | 2   | 2866246   | 2865458 | 2761615 | 2760827 | 2777718 | 2776930 | 2852775      | 2851987 | 3015496    | 3014708 | 1917270    | 1916482 | 2637243    | 2638031 | 2810467    | 2809679 | 3465932 | 3465144 | 3021901 | 3021113 |
| 21                  | BPSL0019            | 2   | 2863468   | 2865078 | 2758837 | 2760447 | 2774940 | 2776550 | 2849969      | 2851579 | 3012795    | 3014405 | 1914618    | 1916228 | 2639881    | 2638271 | 2807822    | 2809432 | 3463294 | 3464904 | 3019270 | 3020880 |
| 22                  | BPSL0020            | 2   | 2862965   | 2863243 | 2758334 | 2758612 | 2774437 | 2774715 | 2849466      | 2849744 | 3012292    | 3012570 | 1914115    | 1914393 | 2640384    | 2640106 | 2807319    | 2807597 | 3462791 | 3463069 | 3018767 | 3019045 |
| 23                  | BPSL0021            | 2   | 2862766   | 2862278 | 2758135 | 2757647 | 2774238 | 2773750 | 2849267      | 2848779 | 3012093    | 3011605 | 1913916    | 1913428 | 2640583    | 2641071 | 2807120    | 2806632 | 3462592 | 3462104 | 3018568 | 3018080 |
| 24                  | BPSL0022            | 2   | 2862127   | 2860568 | 2757496 | 2755937 | 2773599 | 2772040 | 2848628      | 2847069 | 3011454    | 3009895 | 1913277    | 1911718 | 2641222    | 2642781 | 2806481    | 2804922 | 3461953 | 3460394 | 3017929 | 3016370 |
| 25                  | BPSL0023            | 2   | 2859582   | 2860502 | 2754951 | 2755871 | 2771054 | 2771974 | 2846083      | 2847003 | 3008909    | 3009829 | 1910732    | 1911652 | 2643767    | 2642847 | 2803936    | 2804856 | 3459408 | 3460328 | 3015384 | 3016304 |
| 26                  | BPSL0024            | 2   | 2859370   | 2858975 | 2754739 | 2754344 | 2770842 | 2770447 | 2845871      | 2845476 | 3008697    | 3008302 | 1910520    | 1910125 | 2643979    | 2644374 | 2803724    | 2803329 | 3459196 | 3458801 | 3015172 | 3014777 |
| 27                  | BPSL0025            | 2   | 2858903   | 2858184 | 2754272 | 2753553 | 2770375 | 2769656 | 2845404      | 2844468 | 3008820    | 3007511 | 1910053    | 1909334 | 2644446    | 2645165 | 2803257    | 2802538 | 3458729 | 3458010 | 3014705 | 3013986 |
| 28                  | BPSL0026            | 2   | 2857344   | 2856850 | 2752713 | 2752219 | 2768816 | 2768322 | 2843845      | 2843351 | 3006671    | 3006177 | 1908494    | 1908000 | 2646005    | 2646499 | 2801698    | 2801204 | 3457179 | 3456685 | 3013155 | 3012661 |
| 29                  | BPSL0027            | 2   | 2856824   | 2855829 | 2752193 | 2751198 | 2768296 | 2767301 | 2843325      | 2842330 | 3006151    | 3005156 | 1907974    | 1906979 | 2646525    | 2647520 | 2801178    | 2800183 | 3456659 | 3455664 | 3012635 | 3011640 |
| 30                  | BPSL0028            | 2   | 2855833   | 2855339 | 2751202 | 2750708 | 2767305 | 2766811 | 2842334      | 2841840 | 3005160    | 3004666 | 1906983    | 1906489 | 2647516    | 2648010 | 2800187    | 2799693 | 3455668 | 3455174 | 3011644 | 3011150 |
| 31                  | BPSL0029            | 2   | 2855168   | 2854677 | 2750537 | 2750046 | 2766640 | 2766149 | 2841669      | 2841178 | 3004495    | 3004004 | 1906348    | 1905857 | 2648151    | 2648642 | 2799552    | 2799061 | 3455003 | 3454512 | 3010979 | 3010488 |
| 32                  | BPSL0030_fl partial | 2   | 2854603   | 2854391 | 2749972 | 2749760 | 2766075 | 2765863 | 2841104      | 2840892 | 3003930    | 3003718 | 1905783    | 1905571 | 2648716    | 2648928 | 2798987    | 2798775 | 3454438 | 3454226 | 3010414 | 3010202 |
| 33                  | Chr1_2a_IS407A_A    |     | 2853155   | 2854390 | 2748524 | 2749759 | 2764627 | 2765862 | 2839656      | 2840891 | 3002482    | 3003717 | 1904335    | 1905570 | 2648929    | 2650164 | 2797539    | 2798774 | 3452990 | 3454225 | 3008966 | 3010201 |
| 34                  | Chr1_2b_IS407A_A    |     | 2786407   | 2787642 | 2681776 | 2683011 | 2697886 | 2699121 | 2773025      | 2774260 | 2968933    | 2970168 |            |         |            |         |            |         | 3221731 | 3222966 | 2830709 | 2831944 |
| 35                  | BPSL0030_fl partial | 3a  | 2786406   | 2785858 | 2681775 | 2681227 | 2697885 | 2697337 | 2773024      | 2772476 | 2970169    | 2970717 | 1904334    | 1903786 | 2650165    | 2650713 | 2797538    | 2796990 | 3222967 | 3223515 | 2830708 | 2830160 |
| 36                  | BPSL0031            | 3a  | 2785829   | 2785560 | 2681198 | 2680929 | 2697308 | 2697039 | 2772447      | 2772178 | 2970746    | 2971015 | 1903757    | 1903488 | 2650742    | 2651011 | 2796961    | 2796692 | 3223544 | 3223813 | 2830131 | 2829862 |
| 37                  | BPSL0032            | 3a  | 2785438   | 2784659 | 2680807 | 2680028 | 2696917 | 2696138 | 2772056      | 2771277 | 2971137    | 2971916 | 1903366    | 1902587 | 2651133    | 2651912 | 2796570    | 2795791 | 3223935 | 3224714 | 2829740 | 2828961 |

|    |                                              |    |         |         |         |         |         |         |         |         |         |         |         |         |         |         |         |         |         |         |         |         |
|----|----------------------------------------------|----|---------|---------|---------|---------|---------|---------|---------|---------|---------|---------|---------|---------|---------|---------|---------|---------|---------|---------|---------|---------|
| 38 | BPSL0033                                     | 3a | 2783908 | 2784333 | 2678830 | 2679255 | 2695387 | 2695812 | 2770526 | 2770951 | 2972667 | 2972242 | 1901836 | 1902261 | 2652663 | 2652238 | 2795040 | 2795465 | 3225465 | 3225040 | 2828210 | 2828635 |
| 39 | BPSL0034                                     | 3a | 2783826 | 2782954 | 2678748 | 2677876 | 2695305 | 2694433 | 2770444 | 2769572 | 2972749 | 2973621 | 1901754 | 1900882 | 2652745 | 2653617 | 2794958 | 2794086 | 3225547 | 3226419 | 2828128 | 2827256 |
| 40 | BPSL0035                                     | 3a | 2782958 | 2782440 | 2677880 | 2677362 | 2694437 | 2693919 | 2769576 | 2769058 | 2973617 | 2974135 | 1900886 | 1900368 | 2653613 | 2654131 | 2794090 | 2793572 | 3226415 | 3226933 | 2827260 | 2826742 |
| 41 | BPSL0036                                     | 3a | 2782279 | 2781269 | 2677201 | 2676191 | 2693758 | 2692748 | 2768897 | 2767887 | 2974296 | 2975306 | 1900207 | 1899197 | 2654292 | 2655302 | 2793411 | 2792401 | 3227094 | 3228104 | 2826581 | 2825571 |
| 42 | BPSL0037                                     | 3a | 2781182 | 2780388 | 2676104 | 2675310 | 2692661 | 2691867 | 2767800 | 2767006 | 2975393 | 2976187 | 1899110 | 1898316 | 2655389 | 2656183 | 2792314 | 2791520 | 3228191 | 3228985 | 2825484 | 2824690 |
| 43 | BPSL0038                                     | 3a | 2780366 | 2779512 | 2675288 | 2674434 | 2691845 | 2690991 | 2766984 | 2766130 | 2976209 | 2977063 | 1898294 | 1897440 | 2656205 | 2657059 | 2791498 | 2790644 | 3229007 | 3229861 | 2824668 | 2823814 |
| 44 | BPSL0039                                     | 3a | 2779431 | 2778055 | 2674353 | 2672977 | 2690910 | 2689534 | 2766049 | 2764673 | 2977144 | 2978520 | 1897359 | 1895983 | 2657140 | 2658516 | 2790563 | 2789187 | 3229942 | 3231318 | 2823733 | 2822357 |
| 45 | BPSL0040                                     | 3a | 2778041 | 2777367 | 2672963 | 2672289 | 2689520 | 2688846 | 2764659 | 2763985 | 2978534 | 2979208 | 1895969 | 1895295 | 2658530 | 2659204 | 2789173 | 2788499 | 3231332 | 3232006 | 2822343 | 2821669 |
| 46 | BPSL0041                                     | 3a | 2777031 | 2775907 | 2671953 | 2670829 | 2688510 | 2687386 | 2763649 | 2762525 | 2979539 | 2980663 | 1894969 | 1893845 | 2659530 | 2660654 | 2788173 | 2787049 | 3232332 | 3233456 | 2821343 | 2820219 |
| 47 | Chr1_3_ISBma2_C                              | 3a |         |         |         |         |         |         |         |         |         |         |         |         |         |         | 2785321 | 2786893 |         |         |         |         |
| 48 | BPSL0042                                     | 3a | 2775428 | 2773419 | 2670350 | 2668341 | 2686907 | 2684898 | 2762046 | 2760037 | 2981143 | 2983152 | 1893366 | 1891357 | 2661133 | 2663142 | 2784977 | 2782968 | 3233935 | 3235944 | 2819740 | 2817731 |
| 49 | BPSL0043                                     | 3a | 2773375 | 2770349 | 2668297 | 2665271 | 2684854 | 2681828 | 2759993 | 2756967 | 2983196 | 2986222 | 1891313 | 1888287 | 2663186 | 2666212 | 2782924 | 2779898 | 3235988 | 3239014 | 2817687 | 2814661 |
| 50 | BPSL0044                                     | 3a | 2769808 | 2768711 | 2664730 | 2663633 | 2681287 | 2680190 | 2756426 | 2755329 | 2986763 | 2987860 | 1887746 | 1886649 | 2666753 | 2667850 | 2779357 | 2778260 | 3239555 | 3240652 | 2814120 | 2813023 |
| 51 | BPSL0045                                     | 3a | 2768308 | 2767355 | 2663230 | 2662277 | 2679787 | 2678834 | 2754926 | 2753973 | 2988263 | 2989216 | 1886246 | 1885293 | 2668253 | 2669206 | 2777857 | 2776904 | 3241055 | 3242008 | 2812620 | 2811667 |
| 52 | BPSL0046                                     | 3a | 2766495 | 2767223 | 2661417 | 2662145 | 2677974 | 2678702 | 2753113 | 2753841 | 2990076 | 2989348 | 1884433 | 1885161 | 2670066 | 2669338 | 2776044 | 2776772 | 3242868 | 3242140 | 2810807 | 2811535 |
| 53 | BPSL0047                                     | 3a | 2765400 | 2766119 | 2660322 | 2661041 | 2676879 | 2677598 | 2752018 | 2752737 | 2991171 | 2990452 | 1883338 | 1884057 | 2671161 | 2670442 | 2774949 | 2775668 | 3243963 | 3243244 | 2809712 | 2810431 |
| 54 | BPSL0048                                     | 3a | 2764354 | 2765400 | 2659276 | 2660322 | 2675833 | 2676879 | 2750972 | 2752018 | 2992217 | 2991171 | 1882292 | 1883338 | 2672207 | 2671161 | 2773903 | 2774949 | 3245009 | 3243963 | 2808666 | 2809712 |
| 55 | BPSL0049                                     | 3a | 2763479 | 2764354 | 2658401 | 2659276 | 2674958 | 2675833 | 2750097 | 2750972 | 2993092 | 2992217 | 1881417 | 1882292 | 2673082 | 2672207 | 2773028 | 2773903 | 3245884 | 3245009 | 2807791 | 2808666 |
| 56 | BPSL0050                                     | 3a | 2762236 | 2763471 | 2657158 | 2658393 | 2673715 | 2674950 | 2748854 | 2750089 | 2994335 | 2993100 | 1880174 | 1881409 | 2674325 | 2673090 | 2772025 | 2773020 | 3247127 | 3245892 | 2806548 | 2807783 |
| 57 | BPSL0051                                     | 3a | 2760493 | 2761995 | 2654915 | 2656417 | 2671718 | 2673220 | 2747110 | 2748612 | 2996078 | 2994576 | 1878431 | 1879933 | 2676068 | 2674566 | 2770227 | 2771729 | 3248870 | 3247368 | 3155697 | 3157199 |
| 58 | BPSL0052                                     | 3a | 2760045 | 2760434 | 2654467 | 2654856 | 2671270 | 2671659 | 2746662 | 2747051 | 2996526 | 2996137 | 1877983 | 1878372 | 2676516 | 2676127 | 2769779 | 2770168 | 3249318 | 3248929 | 3155249 | 3155638 |
| 59 | BPSL0053                                     | 3a | 2759225 | 2760031 | 2653647 | 2654453 | 2670450 | 2671256 | 2745842 | 2746648 | 2997346 | 2996540 | 1877163 | 1877969 | 2677336 | 2676530 | 2768959 | 2769765 | 3250138 | 3249332 | 3154429 | 3155235 |
| 60 | BPSL0054                                     | 3a | 2758382 | 2759176 | 2652804 | 2653598 | 2669607 | 2670401 | 2744999 | 2745793 | 2998189 | 2997395 | 1876320 | 1877114 | 2678179 | 2677385 | 2768116 | 2768910 | 3250981 | 3250187 | 3153586 | 3154380 |
| 61 | BPSL0055                                     | 3a | 2756648 | 2758294 | 2651070 | 2652716 | 2667873 | 2669519 | 2743265 | 2744911 | 2999923 | 2998277 | 1874586 | 1876232 | 2679913 | 2678267 | 2766382 | 2768028 | 3252715 | 3251069 | 3151852 | 3153498 |
| 62 | BPSL0056                                     | 3a | 2755920 | 2755582 | 2650342 | 2650004 | 2667145 | 2666807 | 2742537 | 2742199 | 3000651 | 3000989 | 1873858 | 1873520 | 2680641 | 2680979 | 2765654 | 2765316 | 3253443 | 3253781 | 3151124 | 3150786 |
| 63 | Chr1_4_IS407A_B                              |    | 2752854 | 2754089 | 2647276 | 2648511 | 2664079 | 2665314 | 2739471 | 2740706 | 3002482 | 3003717 |         |         |         |         |         |         | 3255150 | 3256385 | 3148182 | 3149417 |
| 64 | BPSL0057-putative membrane protein-disrupted |    |         |         |         |         |         |         |         |         |         |         |         |         |         |         |         |         |         |         |         |         |
| 65 | BPSL0058                                     | 3b |         |         |         |         |         |         |         |         |         |         | 1870725 | 1871708 | 2683774 | 2682791 | 2762521 | 2763504 | 3441355 | 3440372 |         |         |
| 66 | BPSL0059                                     | 3b |         |         |         |         |         |         |         |         |         |         | 1869859 | 1870692 | 2684640 | 2683807 | 2761655 | 2762488 | 3442221 | 3441388 |         |         |
| 67 | BPSL0060                                     | 3b |         |         |         |         |         |         |         |         |         |         | 1868327 | 1869403 | 2686172 | 2685096 | 2760123 | 2761199 | 3443753 | 3442677 |         |         |
| 68 | BPSL0061                                     | 3b |         |         |         |         |         |         |         |         |         |         | 1868214 | 1867081 | 2686285 | 2687418 | 2760010 | 2758877 | 3443866 | 3444999 |         |         |
| 69 | BPSL0062                                     | 3b |         |         |         |         |         |         |         |         |         |         | 1866471 | 1865269 | 2688028 | 2689230 | 2758267 | 2757065 | 3445609 | 3446007 |         |         |
| 70 | BPSL0063                                     | 3b |         |         |         |         |         |         |         |         |         |         | 1865253 | 1863133 | 2689246 | 2691366 | 2757049 | 2754929 | 3446826 | 3448946 |         |         |
| 71 | BPSL0064                                     | 3b |         |         |         |         |         |         |         |         |         |         | 1862766 | 1861636 | 2691733 | 2692863 | 2754562 | 2753432 | 3449313 | 3450443 |         |         |
| 72 | BPSL0065                                     | 3b |         |         |         |         |         |         |         |         |         |         | 1860990 | 1861553 | 2693509 | 2692946 | 2752786 | 2753349 | 3451089 | 3450526 |         |         |
| 73 | BPSL0066                                     | 3b |         |         |         |         |         |         |         |         |         |         | 1860190 | 1860651 | 2694309 | 2693848 | 2751986 | 2752447 | 3451889 | 3451428 |         |         |
| 74 | BPSL0067                                     | 3b |         |         |         |         |         |         |         |         |         |         | 1859721 | 1859197 | 2694778 | 2695302 | 2751517 | 2750993 | 3452358 | 3452882 |         |         |
| 75 | BPSL0068                                     | 3b |         |         |         |         |         |         |         |         |         |         | 1859207 | 1859073 | 2695292 | 2695426 | 2751003 | 2750869 | 3452872 | 3453006 |         |         |
| 76 | Chr1_5_IS407A_A                              |    |         |         |         |         |         |         |         |         |         |         | 1857854 | 1859089 | 2695410 | 2696645 | 2749650 | 2750885 | 3452990 | 3454225 |         |         |
| 77 | BPSL0069                                     |    |         |         |         |         |         |         |         |         |         |         |         |         |         |         |         |         |         |         |         |         |
| 78 | BPSL0070                                     |    |         |         |         |         |         |         |         |         |         |         |         |         |         |         |         |         |         |         |         |         |
| 79 | BPSL0071                                     |    |         |         |         |         |         |         |         |         |         |         |         |         |         |         |         |         |         |         |         |         |
| 80 | BPSL0072                                     |    |         |         |         |         |         |         |         |         |         |         |         |         |         |         |         |         |         |         |         |         |
| 81 | Chr1_6_IS407A_A                              |    | 6007    | 7242    | 3419381 | 3420616 | 3439108 | 3440343 | 5679    | 6914    | 3533677 | 3534912 | 2261519 | 2262754 | 6007    | 7242    | 3166175 | 3167410 | 2832213 | 2833448 | 34218   | 35453   |
| 82 | BPSL0073                                     | 4  | 3081    | 5546    | 3416455 | 3418920 | 3436182 | 3438647 | 2753    | 5218    | 3537838 | 3535373 | 2265680 | 2263215 | 3081    | 5546    | 3163249 | 3165714 | 2829287 | 2831752 | 31292   | 33757   |
| 83 | BPSL0074                                     | 4  | 1789    | 2889    | 3415163 | 3416263 | 3434890 | 3435990 | 1461    | 2561    | 3539130 | 3538030 | 2266972 | 2265872 | 1789    | 2889    | 3161957 | 3163057 | 2827995 | 2829095 | 30000   | 31100   |
| 84 | BPSL0075                                     | 4  | 25      | 1623    | 3413459 | 3414997 | 3433174 | 3434724 | 3       | 1295    | 3540894 | 3539296 | 2268736 | 2267138 | 25      | 1623    | 3160193 | 3161791 | 2826231 | 2827829 | 28236   | 29834   |
| 85 | BPSL0075a                                    | 4  | 3509727 | 3509596 | 3412532 | 3412401 | 3431898 | 3431767 | 3495522 | 3495391 | 3541242 | 3541373 | 2269182 | 2269313 | 3495266 | 3495135 | 3159747 | 3159616 | 2825785 | 2825654 | 27790   | 27659   |
| 86 | BPSL0076                                     | 4  | 3509519 | 3509112 | 3412324 | 3411917 | 3431690 | 3431283 | 3495314 | 3494907 | 3541450 | 3541857 | 2269390 | 2269797 | 3495058 | 3494651 | 3159539 | 3159132 | 2825577 | 2825170 | 27582   | 27175   |
| 87 | BPSL0077                                     | 4  | 3509029 | 3508763 | 3411834 | 3411568 | 3431200 | 3430934 | 3494824 | 3494558 | 3541940 | 3542206 | 2269880 | 2270146 | 3494568 | 3494302 | 3159049 | 3158783 | 2825087 | 2824821 | 27092   | 26826   |
| 88 | BPSL0078                                     | 4  | 3508751 | 3507078 | 3411556 | 3409883 | 3430922 | 3429249 | 3494546 | 3492873 | 3542218 | 3543891 | 2270158 | 2271831 | 3494290 | 3492617 | 3158771 | 3157098 | 2824809 | 2823136 | 26814   | 25141   |

|     |          |                  |    |         |         |         |         |         |         |         |         |         |         |         |         |         |         |         |         |         |         |        |        |
|-----|----------|------------------|----|---------|---------|---------|---------|---------|---------|---------|---------|---------|---------|---------|---------|---------|---------|---------|---------|---------|---------|--------|--------|
| 89  | BPSL0079 |                  | 4  | 3506553 | 3506915 | 3409358 | 3409720 | 3428724 | 3429086 | 3492348 | 3492710 | 3544416 | 3544054 | 2272356 | 2271994 | 3492092 | 3492454 | 3156573 | 3156935 | 2822611 | 2822973 | 24616  | 24978  |
| 90  | BPSL0080 |                  | 4  | 3506161 | 3504761 | 3408966 | 3407566 | 3428332 | 3426932 | 3491956 | 3490556 | 3544808 | 3546208 | 2272748 | 2274148 | 3491700 | 3490300 | 3156181 | 3154781 | 2822219 | 2820819 | 24224  | 22824  |
| 91  |          | Chr1_7_IS407A_A  |    | 3503487 | 3504722 | 3406292 | 3407527 | 3425658 | 3426893 | 3489282 | 3490517 | 3546247 | 3547482 | 2274369 | 2275604 | 3488844 | 3490079 | 3153325 | 3154560 | 2819545 | 2820780 | 21550  | 22785  |
| 92  | BPSL0081 | GII              |    |         |         |         |         |         |         |         |         |         |         |         |         |         |         |         |         |         |         |        |        |
| 93  | BPSL0082 | GII              |    |         |         |         |         |         |         |         |         |         |         |         |         |         |         |         |         |         |         |        |        |
| 94  | BPSL0083 | GII              |    |         |         |         |         |         |         |         |         |         |         |         |         |         |         |         |         |         |         |        |        |
| 95  | BPSL0084 | GII              |    |         |         |         |         |         |         |         |         |         |         |         |         |         |         |         |         |         |         |        |        |
| 96  | BPSL0085 | GII              |    |         |         |         |         |         |         |         |         |         |         |         |         |         |         |         |         |         |         |        |        |
| 97  | BPSL0086 | GII              |    |         |         |         |         |         |         |         |         |         |         |         |         |         |         |         |         |         |         |        |        |
| 98  | BPSL0087 | GII              |    |         |         |         |         |         |         |         |         |         |         |         |         |         |         |         |         |         |         |        |        |
| 99  | BPSL0088 | GII              |    |         |         |         |         |         |         |         |         |         |         |         |         |         |         |         |         |         |         |        |        |
| 100 | BPSL0089 | GII              |    |         |         |         |         |         |         |         |         |         |         |         |         |         |         |         |         |         |         |        |        |
| 101 | BPSL0090 | GII_IS407A       |    |         |         |         |         |         |         |         |         |         |         |         |         |         |         |         |         |         |         |        |        |
| 102 | BPSL0091 | GII_IS407A       |    |         |         |         |         |         |         |         |         |         |         |         |         |         |         |         |         |         |         |        |        |
| 103 | BPSL0092 | GII              |    |         |         |         |         |         |         |         |         |         |         |         |         |         |         |         |         |         |         |        |        |
| 104 | BPSL0093 |                  |    |         |         |         |         |         |         |         |         |         |         |         |         |         |         |         |         |         |         |        |        |
| 105 | BPSL0094 |                  |    |         |         |         |         |         |         |         |         |         |         |         |         |         |         |         |         |         |         |        |        |
| 106 | BPSL0095 |                  |    |         |         |         |         |         |         |         |         |         |         |         |         |         |         |         |         |         |         |        |        |
| 107 | BPSL0096 |                  |    |         |         |         |         |         |         |         |         |         |         |         |         |         |         |         |         |         |         |        |        |
| 108 |          | Chr1_8_IS407A_A  |    | 123747  | 124982  | 3538554 | 3539789 | 3559432 | 3560667 | 123374  | 124609  | 3546247 | 3547482 | 2274369 | 2275604 | 2264036 | 2265271 | 3153325 | 3154560 | 2819545 | 2820780 | 21550  | 22785  |
| 109 | BPSL0097 |                  | 5a | 124984  | 125073  | 3539791 | 3539880 | 3560669 | 3560758 | 124611  | 124700  | 3547484 | 3547573 | 2275606 | 2275695 | 2265273 | 2265362 | 3153323 | 3153234 | 2819543 | 2819454 | 21548  | 21459  |
| 110 | BPSL0098 |                  | 5a | 125292  | 125843  | 3540099 | 3540650 | 3560977 | 3561528 | 124919  | 125470  | 3547792 | 3548343 | 2275914 | 2276465 | 2265581 | 2266132 | 3153015 | 3152464 | 2819235 | 2818684 | 21240  | 20689  |
| 111 | BPSL0099 |                  | 5a | 126462  | 126049  | 3541269 | 3540856 | 3562147 | 3561734 | 126089  | 125676  | 3548948 | 3548535 | 2277064 | 2276651 | 2266731 | 2266318 | 3151858 | 3152271 | 2818049 | 2818462 | 20069  | 20482  |
| 112 |          | Chr1_9a_IS407A_C |    |         |         |         |         |         |         |         |         |         |         |         |         |         |         | ?       | ?       |         |         |        |        |
| 113 |          | Chr1_9b_IS407A_C |    |         |         |         |         |         |         |         |         |         |         |         |         |         |         | 3404613 | 3405848 |         |         |        |        |
| 114 | BPSL0100 |                  | 5b | 126864  | 127955  | 112     | 1203    | 1       | 780     | 126279  | 127058  | 282     | 1373    | 2277466 | 2278557 | 2267133 | 2268224 | 2       | 1027    | 2817647 | 2816556 | 19667  | 18576  |
| 115 | BPSL0101 |                  | 5b | 127955  | 128893  | 1203    | 2141    | 780     | 1718    | 127058  | 127996  | 1373    | 2311    | 2278557 | 2279495 | 2268224 | 2269162 | 1027    | 1338    | 2816556 | 2815618 | 18576  | 17713  |
| 116 | BPSL0102 |                  | 5b | 129068  | 130666  | 2316    | 3914    | 1893    | 3491    | 128171  | 129769  | 2486    | 4084    | 2279670 | 2281268 | 2269337 | 2270935 | 2141    | 3739    | 2815443 | 2813845 | 17462  | 15864  |
| 117 | BPSL0103 |                  | 5b | 132136  | 130691  | 5384    | 3939    | 4961    | 3516    | 131239  | 129794  | 5554    | 4109    | 2282738 | 2281293 | 2272405 | 2270960 | 5209    | 3764    | 2812375 | 2813820 | 14394  | 15839  |
| 118 | BPSL0104 |                  | 5b | 132948  | 132403  | 6196    | 5651    | 5773    | 5228    | 132051  | 131506  | 6366    | 5821    | 2283550 | 2283005 | 2273217 | 2272672 | 6021    | 5476    | 2811563 | 2812108 | 13582  | 14127  |
| 119 | BPSL0105 |                  | 5b | 133405  | 133449  | 6653    | 6697    | 6230    | 6274    | 132508  | 132552  | 6817    | 6861    | 2284007 | 2284051 | 2273674 | 2273718 | 6478    | 6522    | 2811106 | 2811062 | 13125  | 13081  |
| 120 | BPSL0106 |                  | 5b | 134110  | 133544  | 7358    | 6792    | 6935    | 6369    | 133213  | 132647  | 7522    | 6956    | 2284712 | 2284146 | 2274379 | 2273813 | 7183    | 6617    | 2810401 | 2810967 | 12420  | 12986  |
| 121 | BPSL0107 |                  | 5b | 135181  | 134216  | 8429    | 7464    | 8006    | 7041    | 134284  | 133319  | 8593    | 7628    | 2285783 | 2284818 | 2275450 | 2274485 | 8254    | 7289    | 2809330 | 2810295 | 11349  | 12314  |
| 122 | BPSL0108 |                  | 5b | 135324  | 136415  | 8572    | 9663    | 8149    | 9240    | 134427  | 135518  | 8736    | 9827    | 2285926 | 2287017 | 2275593 | 2276684 | 8397    | 9488    | 2809187 | 2808096 | 11206  | 10115  |
| 123 | BPSL0109 |                  | 5b | 136447  | 137556  | 9695    | 10804   | 9272    | 10381   | 135550  | 136659  | 9859    | 10968   | 2287049 | 2288158 | 2276716 | 2277825 | 9520    | 10629   | 2808064 | 2806955 | 10083  | 8974   |
| 124 | BPSL0110 |                  | 5b | 137570  | 138442  | 10818   | 11690   | 10395   | 11267   | 136673  | 137545  | 10982   | 11854   | 2288172 | 2289044 | 2277839 | 2278711 | 10643   | 11515   | 2806941 | 2806069 | 8960   | 8088   |
| 125 | BPSL0111 |                  | 5b | 139379  | 140479  | 12627   | 13727   | 12204   | 13304   | 138482  | 139582  | 12791   | 13891   | 2289981 | 2291081 | 2280620 | 2281720 | 12452   | 13552   | 2805132 | 2804032 | 7151   | 6051   |
| 126 | BPSL0112 |                  | 5b | 140839  | 140558  | 14087   | 13806   | 13664   | 13383   | 139942  | 139661  | 14251   | 13970   | 2291441 | 2291160 | 2282080 | 2281799 | 13912   | 13631   | 2803672 | 2803953 | 5691   | 5972   |
| 127 | BPSL0113 |                  | 5b | 141318  | 140839  | 14566   | 14087   | 14143   | 13664   | 140421  | 139942  | 14730   | 14251   | 2291920 | 2291441 | 2282559 | 2282080 | 14391   | 13912   | 2803193 | 2803672 | 5212   | 5691   |
| 128 |          | Chr1_10_IS407A_A |    | 141323  | 142558  | 14571   | 15806   | 14148   | 15383   | 140426  | 141661  | 14735   | 15970   | 2291924 | 2293159 | 2282563 | 2283798 | 14396   | 15631   | 2801953 | 2803188 | 3972   | 5207   |
| 129 |          | Chr1_11_IS407A_C |    |         |         |         |         |         |         |         |         |         |         |         |         | 2300118 | 2301353 |         |         |         |         |        |        |
| 130 |          | Chr1_12_ISBma1_A |    | 142668  | 143972  | 15916   | 17220   | 15493   | 16797   | 141771  | 143075  | 17216   | 18520   | 2294405 | 2295709 | 2302599 | 2303903 | 16877   | 18181   | 2799403 | 2800707 | 1423   | 2727   |
| 131 | BPSL0114 |                  | 5b | 144282  | 144683  | 17530   | 17931   | 17107   | 17508   | 143385  | 143786  | 18830   | 19231   | 2296019 | 2296420 | 2304213 | 2304614 | 18491   | 18892   | 2799093 | 2798692 | 1113   | 712    |
| 132 | BPSL0115 |                  | 5b | 144724  | 145590  | 17972   | 18838   | 17549   | 18415   | 143827  | 144693  | 19272   | 20138   | 2296461 | 2297327 | 2304655 | 2305521 | 18933   | 19799   | 2798651 | 2797785 | 671    | 3      |
| 133 | BPSL0116 |                  | 5b | 146730  | 145717  | 19978   | 18965   | 19555   | 18542   | 145833  | 144820  | 21278   | 20265   | 2298467 | 2297454 | 2306661 | 2305648 | 20939   | 19926   | 2796645 | 2797658 | 188096 | 187083 |
| 134 | BPSL0117 |                  | 5b | 147180  | 148232  | 20428   | 21480   | 20005   | 21057   | 146283  | 147335  | 21728   | 22780   | 2298917 | 2299969 | 2307111 | 2308163 | 21389   | 22441   | 2796195 | 2795143 | 188546 | 189598 |
| 135 | BPSL0118 |                  | 5b | 151066  | 148460  | 24314   | 21708   | 23891   | 21285   | 150169  | 147563  | 25614   | 23008   | 2302803 | 2300197 | 2310997 | 2308391 | 25275   | 22669   | 2792309 | 2794915 | 192432 | 189826 |
| 136 | BPSL0119 |                  | 5b | 151648  | 151280  | 24896   | 24528   | 24473   | 24105   | 150751  | 150383  | 26196   | 25828   | 2303385 | 2303017 | 2311579 | 2311211 | 25857   | 25489   | 2791727 | 2792095 | 193014 | 192646 |
| 137 | BPSL0120 |                  | 5b | 152832  | 151711  | 26080   | 24959   | 25657   | 24536   | 151935  | 150814  | 27380   | 26259   | 2304569 | 2303448 | 2312763 | 2311642 | 27041   | 25920   | 2790543 | 2791664 | 194198 | 193077 |
| 138 | BPSL0121 |                  | 5b | 153127  | 153627  | 26375   | 26875   | 25952   | 26452   | 152230  | 152730  | 27675   | 28175   | 2304864 | 2305364 | 2313058 | 2313558 | 27336   | 27836   | 2790248 | 2789748 | 194493 | 194993 |
| 139 | BPSL0122 |                  | 5b | 153662  | 154642  | 26910   | 27890   | 26487   | 27467   | 152765  | 153745  | 28210   | 29190   | 2305399 | 2306379 | 2313593 | 2314573 | 27871   | 28851   | 2789713 | 2788733 | 195028 | 196008 |







|              |   |                  |         |         |         |         |         |         |         |         |         |         |         |         |         |         |         |         |         |         |         |
|--------------|---|------------------|---------|---------|---------|---------|---------|---------|---------|---------|---------|---------|---------|---------|---------|---------|---------|---------|---------|---------|---------|
| 242 BPSL0219 | 6 | 3379614          | 3379823 | 3280446 | 3280655 | 3298968 | 3299177 | 3365805 | 3366014 | 3454494 | 3454703 | 2176077 | 2175868 | 3368894 | 3368685 | 3251690 | 3251899 | 2918887 | 2919096 | 3383940 | 3384149 |
| 243 BPSL0220 | 6 | 3379867          | 3380895 | 3280699 | 3281727 | 3299221 | 3300249 | 3366058 | 3367086 | 3454747 | 3455775 | 2175824 | 2174796 | 3368641 | 3367613 | 3251943 | 3252971 | 2919140 | 2920168 | 3384193 | 3385221 |
| 244 BPSL0221 | 6 | 3381462          | 3381172 | 3282294 | 3282004 | 3301275 | 3301003 | 3367653 | 3367363 | 3456342 | 3456052 |         |         |         |         |         |         | 2920735 | 2920445 | 3385788 | 3385498 |
| 245 BPSL0222 | 6 | 3383001          | 3381586 | 3283833 | 3282418 | 3302814 | 3301399 | 3369192 | 3367777 | 3457881 | 3456466 | 2172679 | 2174094 | 3365496 | 3366911 | 3255088 | 3253673 | 2922274 | 2920859 | 3387327 | 3385912 |
| 246 BPSL0223 | 6 | 3384705          | 3384076 | 3285537 | 3284908 | 3304518 | 3303889 | 3370896 | 3370267 | 3459585 | 3458956 | 2170975 | 2171604 | 3363792 | 3364421 | 3256792 | 3256163 | 2923978 | 2923349 | 3389031 | 3388402 |
| 247 BPSL0224 | 6 | 3384939          | 3386579 | 3285771 | 3287411 | 3304752 | 3306392 | 3371130 | 3372770 | 3459819 | 3461459 | 2170741 | 2169101 | 3363558 | 3361918 | 3257026 | 3258666 | 2924212 | 2925852 | 3389265 | 3390905 |
| 248 BPSL0225 | 6 | 3388022          | 3386625 | 3289344 | 3288940 | 3308357 | 3308007 | 3373574 | 3372816 | 3462902 | 3461505 | 2167658 | 2169055 | 3360475 | 3361872 | 3260041 | 3259487 | 2927290 | 2925911 | 3392562 | 3392146 |
| 249 BPSL0226 | 6 | 3388507          | 3388058 | 3289829 | 3289380 | 3308842 | 3308393 | 3374501 | 3374052 | 3463387 | 3462938 | 2167173 | 2167622 | 3359990 | 3360439 | 3260526 | 3260077 | 2927775 | 2927326 | 3393047 | 3392598 |
| 250 BPSL0227 | 6 | 3390084          | 3388516 | 3291406 | 3289838 | 3310419 | 3308851 | 3376078 | 3374510 | 3464964 | 3463396 | 2165596 | 2167164 | 3358413 | 3359981 | 3262103 | 3260535 | 2929352 | 2927784 | 3394624 | 3393056 |
| 251 BPSL0228 | 6 | 3390758          | 3390081 | 3292080 | 3291403 | 3311093 | 3310416 | 3376752 | 3376075 | 3465638 | 3464961 | 2164922 | 2165599 | 3357739 | 3358416 | 3262777 | 3262100 | 2930026 | 2929349 | 3395298 | 3394621 |
| 252 BPSL0229 | 6 | 3391746          | 3390754 | 3293068 | 3292076 | 3312081 | 3311089 | 3377740 | 3376748 | 3466626 | 3465634 | 2163934 | 2164926 | 3356751 | 3357743 | 3263765 | 3262773 | 2931014 | 2930022 | 3396286 | 3395294 |
| 253 BPSL0230 | 6 | 3393532          | 3391739 | 3294854 | 3293061 | 3313867 | 3312074 | 3379526 | 3377733 | 3468412 | 3466619 | 2162148 | 2163941 | 3354965 | 3356758 | 3265551 | 3263758 | 2932800 | 2931007 | 3398072 | 3396279 |
| 254 BPSL0231 | 6 | 3393781          | 3394119 | 3295103 | 3295441 | 3314116 | 3314454 | 3379775 | 3380113 | 3468678 | 3469016 | 2161899 | 2161561 | 3354716 | 3354378 | 3265800 | 3266138 | 2933049 | 2933387 | 3398321 | 3398659 |
| 255 BPSL0232 | 6 | 3394255          | 3394686 | 3295577 | 3296008 | 3314590 | 3315021 | 3380249 | 3380680 | 3469152 | 3469583 | 2161425 | 2160994 | 3354242 | 3353811 | 3266274 | 3266705 | 2933523 | 2933954 | 3398795 | 3399226 |
| 256 BPSL0233 | 6 | 3394686          | 3395009 | 3296008 | 3296331 | 3315021 | 3315344 | 3380680 | 3381003 | 3469583 | 3469906 | 2160994 | 2160671 | 3353811 | 3353488 | 3266705 | 3267028 | 2933954 | 2934277 | 3399226 | 3399549 |
| 257 BPSL0234 | 6 | 3395122          | 3396624 | 3296444 | 3296584 | 3315457 | 3316959 | 3381116 | 3382618 | 3470019 | 3471521 | 2160558 | 2159056 | 3353375 | 3351873 | 3267141 | 3268643 | 2934390 | 2935892 | 3399662 | 3399748 |
| 258 BPSL0235 | 6 | 3396608          | 3396922 | 3298742 | 3299056 | 3316943 | 3317257 | 3382602 | 3382916 | 3471505 | 3471819 | 2159072 | 2158758 | 3351889 | 3351575 | 3268627 | 3268941 | 2935876 | 2936190 | 3400552 | 3400866 |
| 259 BPSL0236 | 6 | 3397118          | 3397861 | 3299252 | 3299995 | 3317453 | 3318196 | 3383112 | 3383855 | 3472015 | 3472758 | 2158562 | 2157819 | 3351379 | 3350636 | 3269137 | 3269880 | 2936386 | 2937129 | 3401062 | 3401805 |
| 260 BPSL0237 | 6 | 3398980          | 3397964 | 3301114 | 3300098 | 3319315 | 3318299 | 3384974 | 3383958 | 3473877 | 3472861 | 2156688 | 2157716 | 3349505 | 3350533 | 3271011 | 3269983 | 2938248 | 2937232 | 3402924 | 3401908 |
| 261 BPSL0238 | 6 | 3400582          | 3399182 | 3302716 | 3301316 | 3320917 | 3319517 | 3386576 | 3385176 | 3475479 | 3474079 | 2155086 | 2156486 | 3347903 | 3349303 | 3272613 | 3271213 | 2939850 | 2938450 | 3404526 | 3403126 |
| 262 BPSL0239 | 6 | 3401480          | 3400827 | 3303614 | 3302961 | 3321815 | 3321162 | 3387474 | 3386821 | 3476377 | 3475724 | 2154188 | 2154841 | 3347005 | 3347658 | 3273511 | 3272858 | 2940748 | 2940095 | 3405424 | 3404771 |
| 263          | 6 | Chr1_16_ISBma2_B | 3402607 | 3404179 | 3304741 | 3306313 | 3322942 | 3324514 | 3388601 | 3390173 | 3477498 | 3479070 |         |         |         |         |         |         |         |         |         |
| 264 BPSL0240 | 6 |                  | 3304353 | 3304243 | 3322554 | 3322444 | 3388213 | 3388103 | 3477110 | 3477000 |         | 2153449 | 2153559 | 3346266 | 3346376 | 3274250 | 3274140 | 2941487 | 2941377 | 3406163 | 3406053 |
| 265 BPSL0241 | 6 | 3404997          | 3404230 | 3307131 | 3306364 | 3325332 | 3324565 | 3390991 | 3390224 | 3479888 | 3479121 | 2152265 | 2153032 | 3345082 | 3345849 | 3275434 | 3274667 | 2942671 | 2941904 | 3407347 | 3406580 |
| 266 BPSL0242 | 6 | 3405863          | 3405213 | 3307997 | 3307347 | 3326198 | 3325548 | 3391857 | 3391207 | 3480754 | 3480104 | 2151399 | 2152049 | 3344216 | 3344866 | 3276300 | 3275650 | 2943537 | 2942887 | 3408213 | 3407563 |
| 267 BPSL0243 | 6 | 3406741          | 3405932 | 3308875 | 3308066 | 3327076 | 3326267 | 3392735 | 3391926 | 3481632 | 3480823 | 2150521 | 2151309 | 3343338 | 3344147 | 3277178 | 3276369 | 2944415 | 2943606 | 3409091 | 3408282 |
| 268 BPSL0244 | 6 | 3407311          | 3406751 | 3309445 | 3308885 | 3327646 | 3327086 | 3393305 | 3392745 | 3482202 | 3481642 | 2149951 | 2150511 | 3342768 | 3343328 | 3277748 | 3277188 | 2944485 | 2944225 | 3409661 | 3409101 |
| 269 BPSL0245 | 6 | 3407645          | 3408649 | 3309779 | 3310783 | 3327980 | 3328984 | 3393639 | 3394643 | 3482536 | 3483540 | 2149617 | 2148613 | 3342434 | 3341430 | 3278082 | 3279086 | 2945319 | 2946323 | 3409995 | 3410999 |
| 270 BPSL0246 | 6 | 3408724          | 3409842 | 3310858 | 3311976 | 3329059 | 3330177 | 3394718 | 3395836 | 3483615 | 3484733 | 2148538 | 2147420 | 3341355 | 3340237 | 3279161 | 3280279 | 2946398 | 2947516 | 3411074 | 3412192 |
| 271 BPSL0247 | 6 | 3409980          | 3410291 | 3312114 | 3312425 | 3330315 | 3330626 | 3395974 | 3396285 | 3484871 | 3485182 | 2147282 | 2146971 | 3340099 | 3339788 | 3280417 | 3280728 | 2947654 | 2947965 | 3412330 | 3412641 |
| 272 BPSL0248 | 6 | 3410526          | 3411815 | 3312660 | 3313949 | 3330861 | 3332150 | 3396520 | 3397809 | 3485417 | 3486706 | 2146736 | 2145447 | 3339553 | 3338264 | 3280963 | 3282252 | 2948200 | 2949489 | 3412876 | 3414165 |
| 273 BPSL0249 | 6 | 3412225          | 3413850 | 3314359 | 3315984 | 3332560 | 3334185 | 3398219 | 3399844 | 3487116 | 3488741 | 2145037 | 2143412 | 3337854 | 3336229 | 3282662 | 3284281 | 2949899 | 2951524 | 3414575 | 3416200 |
| 274 BPSL0250 | 6 | 3413965          | 3414978 | 3316099 | 3317112 | 3334300 | 3335313 | 3399959 | 3400972 | 3488856 | 3489869 | 2143297 | 2142284 | 3336114 | 3335101 | 3284396 | 3285409 | 2951639 | 2952652 | 3416315 | 3417328 |
| 275 BPSL0251 | 6 | 3415670          | 3415855 | 3317124 | 3317810 | 3335415 | 3336011 | 3401074 | 3401670 | 3489971 | 3490567 | 2142182 | 2141586 | 3334999 | 3334403 | 3285511 | 3286107 | 2952754 | 2953350 | 3417430 | 3418026 |
| 276 BPSL0252 | 6 | 3415860          | 3416849 | 3317994 | 3318983 | 3336195 | 3337184 | 3401854 | 3402843 | 3490751 | 3491740 | 2141402 | 2140413 | 3334219 | 3333230 | 3286291 | 3287280 | 2953534 | 2954523 | 3418210 | 3419199 |
| 277 BPSL0253 | 6 | 3416849          | 3417862 | 3318983 | 3319996 | 3337184 | 3338197 | 3402843 | 3403856 | 3491740 | 3492753 | 2140413 | 2139400 | 3333230 | 3332217 | 3287280 | 3288293 | 2954523 | 2955536 | 3419199 | 3420212 |
| 278 BPSL0254 | 6 | 3417978          | 3419003 | 3320523 | 3321473 | 3338313 | 3338399 | 3403972 | 3404997 | 3492869 | 3493894 | 2139284 | 2138259 | 3332101 | 3331076 | 3288409 | 3289434 | 2955652 | 2956677 | 3420328 | 3421353 |
| 279          | 6 | Chr1_17_ISBma2_C |         |         |         |         |         |         |         |         |         |         |         |         |         |         |         | 2957135 | 2958707 |         |         |
| 280 BPSL0255 | 6 | 3420436          | 3419483 | 3322906 | 3321953 | 3341338 | 3340385 | 3406430 | 3405477 | 3495327 | 3494374 | 2136826 | 2137779 | 3329643 | 3330596 | 3290867 | 3289914 | 2959701 | 2958748 | 3422786 | 3421833 |
| 281 BPSL0256 | 6 | 3421185          | 3420436 | 3323655 | 3322906 | 3342087 | 3341338 | 3407179 | 3406430 | 3496076 | 3495327 | 2136077 | 2136826 | 3328894 | 3329643 | 3291616 | 3290867 | 2960450 | 2959701 | 3423535 | 3422786 |
| 282 BPSL0257 | 6 | 3422569          | 3421808 | 3325039 | 3324278 | 3343471 | 3342710 | 3408563 | 3407802 | 3497451 | 3496690 | 2134693 | 2135454 | 3327510 | 3328271 | 3293000 | 3292239 | 2961834 | 2961073 | 3424919 | 3424151 |
| 283 BPSL0258 | 6 | 3423705          | 3422641 | 3326175 | 3325111 | 3344607 | 3343543 | 3409699 | 3408635 | 3498587 | 3497523 | 2133557 | 2134621 | 3326374 | 3327438 | 3294136 | 3293072 | 2962950 | 2961906 | 3426055 | 3424998 |
| 284 BPSL0259 | 6 | 3424358          | 3423705 | 3326828 | 3326175 | 3345260 | 3344607 | 3410352 | 3409699 | 3499240 | 3498587 | 2132904 | 2133557 | 3325721 | 3326374 | 3294789 | 3294136 | 2963623 | 2962970 | 3426708 | 3426055 |
| 285 BPSL0260 | 6 | 3424508          | 3425017 | 3326978 | 3327487 | 3345410 | 3345919 | 3410502 | 3411011 | 3499390 | 3499899 | 2132754 | 2132245 | 3325571 | 3325062 | 3294939 | 3295448 | 2963773 | 2964282 | 3426858 | 3427367 |
| 286 BPSL0261 | 6 | 3425848          | 3425255 | 3328318 | 3327725 | 3346750 | 3346157 | 3411842 | 3411249 | 3500730 | 3500137 | 2131414 | 2132007 | 3324231 | 3324824 | 3296279 | 3295686 | 2965113 | 2964520 | 3428198 | 3427605 |
| 287 BPSL0262 | 6 | 3425870          | 3427822 | 3328340 | 3330292 | 3346772 | 3348724 | 3411864 | 3413816 | 3500752 | 3502704 | 2131392 | 2129440 | 3324209 | 3322257 | 3296301 | 3298253 | 2965135 | 2967087 | 3428220 | 3428172 |
| 288 BPSL0263 | 6 | 3427947          | 3428903 | 3330417 | 3331373 | 3348849 | 3349805 | 3413941 | 3414897 | 3502829 | 3503785 | 2129315 | 2128359 | 3322132 | 3321176 | 3298378 | 3299334 | 2967212 | 2968168 | 3430297 | 3431253 |
| 289 BPSL0264 | 6 | 3428961          | 3429614 | 3331431 | 3332084 | 3349863 | 3350516 | 3414955 | 3415608 | 35      |         |         |         |         |         |         |         |         |         |         |         |

|     |                   |   |         |         |         |         |         |         |         |         |         |         |         |         |         |         |         |         |         |         |         |         |
|-----|-------------------|---|---------|---------|---------|---------|---------|---------|---------|---------|---------|---------|---------|---------|---------|---------|---------|---------|---------|---------|---------|---------|
| 293 | BPSL0268          | 6 | 3433061 | 3432720 | 3335531 | 3335190 | 3353963 | 3353622 | 3419055 | 3418714 | 3507943 | 3507602 | 2124201 | 2124542 | 3317018 | 3317359 | 3303492 | 3303151 | 2972326 | 2971985 | 3435411 | 3435070 |
| 294 | BPSL0269          | 6 | 3434001 | 3433168 | 3336471 | 3335638 | 3354903 | 3354070 | 3419995 | 3419162 | 3508883 | 3508050 | 2123261 | 2124094 | 3316078 | 3316911 | 3304432 | 3303599 | 2973266 | 2972433 | 3436351 | 3435518 |
| 295 | BPSL0270          | 6 | 3434938 | 3435426 | 3337408 | 3337896 | 3355840 | 3356328 | 3420932 | 3421420 | 3509820 | 3510308 | 2122312 | 2121824 | 3315129 | 3314641 | 3305381 | 3305869 | 2974203 | 2974691 | 3437288 | 3437776 |
| 296 | BPSL0271          | 6 | 3435513 | 3435935 | 3337983 | 3338405 | 3356415 | 3356837 | 3421507 | 3421929 | 3510395 | 3510817 | 2121737 | 2121315 | 3314554 | 3314132 | 3305956 | 3306378 | 2974778 | 2975200 | 3437863 | 3438285 |
| 297 | BPSL0272          | 6 | 3436058 | 3436822 | 3338528 | 3339292 | 3356960 | 3357724 | 3422052 | 3422816 | 3510940 | 3511704 | 2121192 | 2120428 | 3314009 | 3313245 | 3306501 | 3307265 | 2975323 | 2976087 | 3438408 | 3439172 |
| 298 | BPSL0273          | 6 | 3436853 | 3438091 | 3339323 | 3340561 | 3357755 | 3358993 | 3422847 | 3424085 | 3511735 | 3512973 | 2120397 | 2119159 | 3313214 | 3311976 | 3307296 | 3308534 | 2976118 | 2977356 | 3439203 | 3440441 |
| 299 | BPSL0274          | 6 | 3438121 | 3438879 | 3340591 | 3341349 | 3359023 | 3359781 | 3424115 | 3424873 | 3513003 | 3513761 | 2119129 | 2118371 | 3311946 | 3311188 | 3308564 | 3309322 | 2977386 | 2978144 | 3440471 | 3441229 |
| 300 | BPSL0275          | 6 | 3438916 | 3439701 | 3341386 | 3342171 | 3359818 | 3360603 | 3424910 | 3425695 | 3513798 | 3514583 | 2118334 | 2117549 | 3311151 | 3310366 | 3309359 | 3310144 | 2978181 | 2978966 | 3441266 | 3442051 |
| 301 | BPSL0276          | 6 | 3439732 | 3440442 | 3342202 | 3342912 | 3360634 | 3361344 | 3425726 | 3426436 | 3514607 | 3515326 | 2117525 | 2116812 | 3310342 | 3309629 | 3310168 | 3310887 | 2978990 | 2979709 | 3442075 | 3442794 |
| 302 | BPSL0277          | 6 | 3440460 | 3441641 | 3342930 | 3344111 | 3361362 | 3362543 | 3426454 | 3427635 | 3515344 | 3516525 | 2116794 | 2115613 | 3309611 | 3308430 | 3310905 | 3312086 | 2979727 | 2980908 | 3442812 | 3443993 |
| 303 | BPSL0278          | 6 | 3441645 | 3442577 | 3344115 | 3345047 | 3362547 | 3363479 | 3427639 | 3428571 | 3516529 | 3517461 | 2115609 | 2114677 | 3308426 | 3307494 | 3312090 | 3313022 | 2980912 | 2981844 | 3443997 | 3444929 |
| 304 | BPSL0279          | 6 | 3442796 | 3443551 | 3345266 | 3346021 | 3363698 | 3364453 | 3428790 | 3429545 | 3517680 | 3518435 | 2114458 | 2113703 | 3307275 | 3306520 | 3313241 | 3313996 | 2982063 | 2982818 | 3445148 | 3445903 |
| 305 | BPSL0280          | 6 | 3443760 | 3445760 | 3346230 | 3348230 | 3364662 | 3366662 | 3429754 | 3431754 | 3518644 | 3520644 | 2113494 | 2111494 | 3306311 | 3304311 | 3314205 | 3316205 | 2983027 | 2985207 | 3446112 | 3448112 |
| 306 | BPSL0281          | 6 | 3445779 | 3447008 | 3348249 | 3349478 | 3366681 | 3367910 | 3431773 | 3432963 | 3520663 | 3521892 | 2111475 | 2110246 | 3304292 | 3303063 | 3316224 | 3317453 | 2985046 | 2986275 | 3448131 | 3449282 |
| 307 | BPSL0282          | 6 | 3447379 | 3448683 | 3349849 | 3351153 | 3368281 | 3369585 | 3433381 | 3434685 | 3522263 | 3523567 | 2109875 | 2108571 | 3302692 | 3301388 | 3317824 | 3319128 | 2986646 | 2987950 | 3450071 | 3451375 |
| 308 | BPSL0283          | 6 | 3449757 | 3449074 | 3352227 | 3351544 | 3370659 | 3369976 | 3435759 | 3435076 | 3524641 | 3523958 | 2107491 | 2108174 | 3300308 | 3300991 | 3320208 | 3319525 | 2989030 | 2988347 | 3452455 | 3451772 |
| 309 | BPSL0284          | 6 | 3449855 | 3450451 | 3352325 | 3352921 | 3370757 | 3371353 | 3435857 | 3436453 | 3524739 | 3525335 | 2107393 | 2106797 | 3300210 | 3299614 | 3320306 | 3320902 | 2989128 | 2989724 | 3452553 | 3453149 |
| 310 | BPSL0285          | 6 | 3450451 | 3450978 | 3352921 | 3353448 | 3371353 | 3371880 | 3436453 | 3436980 | 3525335 | 3525862 | 2106797 | 2106270 | 3299614 | 3299087 | 3320902 | 3321429 | 2989724 | 2990251 | 3453149 | 3453676 |
| 311 | BPSL0286          | 6 | 3451669 | 3451334 | 3354139 | 3353804 | 3372571 | 3372236 | 3437671 | 3437336 | 3526553 | 3526218 | 2105579 | 2105914 | 3298396 | 3298731 | 3322120 | 3321785 | 2990067 | 2990651 | 3454367 | 3454032 |
| 312 | BPSL0287          | 6 | 3451783 | 3452124 | 3354253 | 3354594 | 3372685 | 3373026 | 3437785 | 3438126 | 3526667 | 3527008 | 2105465 | 2105124 | 3298282 | 3297941 | 3322234 | 3322575 | 2991056 | 2991397 | 3454481 | 3454822 |
| 313 | BPSL0288          | 6 | 3452145 | 3452852 | 3354615 | 3355322 | 3373047 | 3373754 | 3438147 | 3438854 | 3527029 | 3527736 | 2105103 | 2104396 | 3297920 | 3297213 | 3322596 | 3323303 | 2991418 | 2992125 | 3454843 | 3455550 |
| 314 | BPSL0289          | 6 | 3453399 | 3454529 | 3355869 | 3356999 | 3374301 | 3375431 | 3439401 | 3440531 | 3528283 | 3529413 | 2103849 | 2102719 | 3296666 | 3295536 | 3323850 | 3324980 | 2992672 | 2993802 | 3456097 | 3457227 |
| 315 | BPSL0290          | 6 | 3455523 | 3454693 | 3357993 | 3357163 | 3376425 | 3375595 | 3441525 | 3440695 | 3530407 | 3529577 | 2101725 | 2102555 | 3294542 | 3295372 | 3325974 | 3325144 | 2994796 | 2993966 | 3458221 | 3457391 |
| 316 | BPSL0291          | 6 | 3456134 | 3455574 | 3358604 | 3358044 | 3377036 | 3376476 | 3442136 | 3441576 | 3531018 | 3530458 | 2101114 | 2101674 | 3293931 | 3294491 | 3326585 | 3326025 | 2995407 | 2994847 | 3458832 | 3458272 |
| 317 | BPSL0292          | 6 | 3457572 | 3456505 | 3360042 | 3358975 | 3378474 | 3377407 | 3443574 | 3442507 | 3532456 | 3531389 | 2099676 | 2100743 | 3292493 | 3293560 | 3328023 | 3326956 | 2996845 | 2995778 | 3460270 | 3459203 |
| 318 | BPSL0293_1        | 6 | 3458791 | 3457568 | 3361261 | 3360038 | 3379693 | 3378470 | 3444793 | 3443570 | 3533675 | 3532452 | 2098457 | 2099680 | 3291274 | 3292497 | 3329242 | 3328019 | 2998064 | 2996841 | 3461489 | 3460266 |
| 319 | Chr1_18a_IS407A_A |   | 3458793 | 3460028 | 3361263 | 3362498 | 3379695 | 3380930 | 3444795 | 3446030 | 3533677 | 3534912 | 2097220 | 2098455 | 3290037 | 3291272 | 3329244 | 3330479 | 2998066 | 2999301 | 3461491 | 3462726 |
| 320 | Chr1_18b_IS407A_A |   |         |         |         |         |         |         |         |         | 163047  | 164282  |         |         | 2614655 | 2615890 |         |         |         |         |         |         |
| 321 | BPSL0293_4        | 7 | 3460073 | 3460029 | 3362543 | 3362499 | 3380975 | 3380931 | 3446075 | 3446031 |         |         | 2097175 | 2097219 |         |         | 3330524 | 3330480 | 2999346 | 2999302 |         |         |
| 322 | BPSL0294          | 7 | 3461984 | 3460458 | 3364454 | 3362928 | 3382886 | 3381360 | 3447986 | 3446460 | 161091  | 162617  | 2095264 | 2096790 | 2617846 | 2616320 | 3332435 | 3330909 | 3001257 | 2999731 | 3464682 | 3463156 |
| 323 | BPSL0295          | 7 | 3463616 | 3465286 | 3366086 | 3367756 | 3384518 | 3386188 | 3449618 | 3451288 | 159459  | 157789  | 2093632 | 2091962 | 2619478 | 2621148 | 3334067 | 3335737 | 3002889 | 3004559 | 3466314 | 3467984 |
| 324 | BPSL0296          | 7 | 3465848 | 3466069 | 3368318 | 3368539 | 3386750 | 3386971 | 3451850 | 3452071 | 157227  | 157006  | 2091400 | 2091179 | 2621710 | 2621931 | 3336299 | 3336520 | 3005121 | 3005342 | 3468546 | 3468767 |
| 325 | Chr1_19a_ISBma2_A |   | 3466142 | 3467714 | 3368613 | 3370185 | 3387044 | 3388616 | 3452144 | 3453716 | 155357  | 156927  | 2089532 | 2091106 | 2622004 | 2623575 | 3336593 | 3338164 | 3005415 | 3006987 | 3468840 | 3470412 |
| 326 | Chr1_19b_ISBma2_A |   |         |         |         |         |         |         |         |         |         |         |         |         | 2193940 | 2195512 |         |         |         |         |         |         |
| 327 | BPSL0297          | 8 | 3467866 | 3469224 | 3370337 | 3371695 | 3388768 | 3390126 | 3453868 | 3455226 | 155205  | 153847  | 2089380 | 2088022 | 2195664 | 2197022 | 3338316 | 3339674 | 3007139 | 3008497 | 3470564 | 3471922 |
| 328 | BPSL0298          | 8 | 3469820 | 3471157 | 3372291 | 3373628 | 3390722 | 3392059 | 3455822 | 3457159 | 153251  | 151914  | 2087426 | 2086089 | 2197618 | 2198955 | 3340270 | 3341607 | 3009093 | 3010430 | 3472518 | 3473855 |
| 329 | BPSL0299          | 8 | 3471322 | 3471954 | 3373793 | 3374425 | 3392224 | 3392856 | 3457324 | 3457956 | 151749  | 151117  | 2085924 | 2085292 | 2199120 | 2199752 | 3341772 | 3342404 | 3010595 | 3011227 | 3474020 | 3474652 |
| 330 | BPSL0300          | 8 | 3472047 | 3472769 | 3374518 | 3375240 | 3392949 | 3393671 | 3458049 | 3458771 | 151024  | 150302  | 2085199 | 2084477 | 2199845 | 2200567 | 3342497 | 3343219 | 3011320 | 3012042 | 3474745 | 3475467 |
| 331 | BPSL0301          | 8 | 3473094 | 3473339 | 3375565 | 3375810 | 3393996 | 3394241 | 3459096 | 3459341 | 149977  | 149732  | 2084152 | 2083907 | 2200892 | 2201137 | 3343544 | 3343789 | 3012367 | 3012612 | 3475792 | 3476037 |
| 332 | BPSL0302          | 8 | 3476336 | 3473916 | 3378807 | 3376387 | 3397238 | 3394818 | 3462338 | 3459918 | 146735  | 149155  | 2080897 | 2083317 | 2204147 | 2201727 | 3346799 | 3344379 | 3015648 | 3013228 | 3479073 | 3476653 |
| 333 | BPSL0303          | 8 | 3476981 | 3477652 | 3379452 | 3380123 | 3397883 | 3398554 | 3462983 | 3463654 | 146090  | 145419  | 2080252 | 2079581 | 2204792 | 2205463 | 3347444 | 3348115 | 3016293 | 3016964 | 3479718 | 3480389 |
| 334 | BPSL0304          | 8 | 3477652 | 3478497 | 3380123 | 3380968 | 3398554 | 3399399 | 3463654 | 3464499 | 145419  | 144574  | 2079581 | 2078736 | 2205463 | 2206308 | 3348115 | 3348960 | 3016964 | 3017809 | 3480389 | 3481234 |
| 335 | BPSL0305          | 8 | 3478497 | 3478994 | 3380968 | 3381465 | 3399399 | 3399896 | 3464499 | 3464996 | 144574  | 144077  | 2078736 | 2078239 | 2206308 | 2206805 | 3348960 | 3349457 | 3017809 | 3018306 | 3481234 | 3481731 |
| 336 | BPSL0306          | 8 | 3479072 | 3479497 | 3381543 | 3381968 | 3399974 | 3400399 | 3465074 | 3465499 | 143999  | 143574  | 2078161 | 2077736 | 2206883 | 2207308 | 3349535 | 3349960 | 3018384 | 3018809 | 3481809 | 3482234 |
| 337 | BPSL0307          | 8 | 3479599 | 3480897 | 3382070 | 3383368 | 3400501 | 3401799 | 3465601 | 3466899 | 143472  | 142174  | 2077634 | 2076336 | 2207410 | 2208708 | 3350062 | 3351360 | 3018911 | 3020209 | 3482336 | 3483634 |
| 338 | BPSL0308          | 8 | 3480911 | 3482473 | 3383382 | 3384944 | 3401813 | 3403375 | 3466913 | 3468190 | 142160  | 140598  | 2076322 | 2074760 | 2208722 | 2210284 | 3351374 | 3352936 | 3020223 | 3021785 | 3483648 | 3485210 |
| 339 | BPSL0309          | 8 | 3482473 | 3485682 | 3384944 | 3388153 | 3403375 | 3406584 | 3468477 | 3471686 | 140598  | 137389  | 2074760 | 2071551 | 2210284 | 2213493 | 3352936 | 3356145 | 3021785 | 3024994 | 3485210 | 348841  |

|     |                  |   |         |         |         |         |         |         |         |         |        |        |         |         |         |         |         |         |         |         |         |         |
|-----|------------------|---|---------|---------|---------|---------|---------|---------|---------|---------|--------|--------|---------|---------|---------|---------|---------|---------|---------|---------|---------|---------|
| 344 | BPSL0314         | 8 | 3491557 | 3490565 | 3394028 | 3393036 | 3413220 | 3412228 | 3477505 | 3476513 | 131514 | 132506 | 2065676 | 2066668 | 2219368 | 2218376 | 3360909 | 3359917 | 3030869 | 3029877 | 3494256 | 3493264 |
| 345 | BPSL0315         | 8 | 3491958 | 3491557 | 3394429 | 3394028 | 3413621 | 3413220 | 3477906 | 3477505 | 131113 | 131514 | 2065275 | 2065676 | 2219769 | 2219368 | 3361310 | 3360909 | 3031270 | 3030869 | 3494657 | 3494256 |
| 346 | BPSL0316         | 8 | 3492936 | 3492043 | 3395741 | 3394848 | 3415107 | 3414871 |         |         | 130083 | 130973 | 2064312 | 2065190 | 2220732 | 2219854 |         |         | 3032248 | 3031355 | 3495293 | 3494802 |
| 347 | BPSL0317         | 8 | 3493004 | 3494191 | 3395809 | 3396996 | 3415175 | 3416362 | 3478799 | 3479986 | 130015 | 128828 | 2064244 | 2063057 | 2220800 | 2221987 | 3361454 | 3362551 | 3032316 | 3033503 | 186480  | 185293  |
| 348 | BPSL0318         | 8 | 3494212 | 3494403 | 3397017 | 3397208 | 3416383 | 3416574 | 3480007 | 3480198 | 128807 | 128616 | 2063036 | 2062845 | 2222008 | 2222199 | 3362572 | 3362763 | 3033524 | 3033715 | 185272  | 185081  |
| 349 | BPSL0319         | 8 | 3495234 | 3494701 | 3398039 | 3397506 | 3417405 | 3416872 | 3481029 | 3480496 | 127785 | 128318 | 2062014 | 2062547 | 2223030 | 2222497 | 3363594 | 3363061 | 3034546 | 3034013 | 184250  | 184783  |
| 350 | BPSL0320         | 8 | 3496139 | 3495234 | 3398944 | 3398039 | 3418310 | 3417405 | 3481934 | 3481029 | 126880 | 127785 | 2061109 | 2062014 | 2223935 | 2223030 | 3364499 | 3363594 | 3035451 | 3034546 | 183345  | 184250  |
| 351 | BPSL0321         | 8 | 3497587 | 3496139 | 3400392 | 3398944 | 3419758 | 3418310 | 3483382 | 3481934 | 125432 | 126880 | 2059661 | 2061109 | 2225383 | 2223935 |         |         | 3036899 | 3035451 | 181897  | 183345  |
| 352 | BPSL0322         | 8 | 3498603 | 3497587 | 3401408 | 3400392 | 3420774 | 3419758 | 3484398 | 3483382 | 124416 | 125432 | 2058645 | 2059661 | 2226399 | 2225383 | 3366967 | 3365951 | 3037915 | 3036899 | 180881  | 181897  |
| 353 | BPSL0323         | 8 | 3500333 | 3498777 | 3403138 | 3401582 | 3422504 | 3420948 | 3486128 | 3484572 | 122686 | 124242 | 2056915 | 2058471 | 2228129 | 2226573 | 3368697 | 3367141 | 3039645 | 3038089 | 179151  | 180707  |
| 354 | BPSL0324         | 8 | 3501869 | 3500832 | 3404674 | 3403637 | 3424040 | 3423003 | 3487664 | 3486627 | 121150 | 122187 | 2055379 | 2056416 | 2229665 | 2228628 | 3370233 | 3369196 | 3041181 | 3040144 | 177615  | 178652  |
| 355 | BPSL0325         | 8 | 3502298 | 3502723 | 3405103 | 3405528 | 3424469 | 3424894 | 3488093 | 3488518 | 120721 | 120296 | 2054950 | 2054525 | 2230094 | 2230519 | 3370662 | 3371087 | 3041610 | 3042035 | 177186  | 176761  |
| 356 | BPSL0326         | 8 | 3503116 | 3503493 | 3405921 | 3406298 | 3425287 | 3425664 | 3488911 | 3489288 | 119903 | 119526 | 2054132 | 2053755 | 2230912 | 2231289 | 3371480 | 3371857 | 3042428 | 3042805 | 176368  | 175991  |
| 357 | Chr1_20_IS407A_A |   | 3503487 | 3504722 | 3406292 | 3407527 | 3425658 | 3426893 | 3489282 | 3490517 | 118297 | 119532 | 2052526 | 2053761 | 2231283 | 2232518 | 3371851 | 3373086 | 3042799 | 3044034 | 174762  | 175997  |
| 358 | BPSL0327         |   |         |         |         |         |         |         |         |         |        |        |         |         |         |         |         |         |         |         |         |         |
| 359 | BPSL0328         |   |         |         |         |         |         |         |         |         |        |        |         |         |         |         |         |         |         |         |         |         |
| 360 | BPSL0329         |   |         |         |         |         |         |         |         |         |        |        |         |         |         |         |         |         |         |         |         |         |
| 361 | BPSL0330         |   |         |         |         |         |         |         |         |         |        |        |         |         |         |         |         |         |         |         |         |         |
| 362 | BPSL0331         |   |         |         |         |         |         |         |         |         |        |        |         |         |         |         |         |         |         |         |         |         |
| 363 | BPSL0332         |   |         |         |         |         |         |         |         |         |        |        |         |         |         |         |         |         |         |         |         |         |
| 364 | BPSL0333         |   |         |         |         |         |         |         |         |         |        |        |         |         |         |         |         |         |         |         |         |         |
| 365 | BPSL0334         |   |         |         |         |         |         |         |         |         |        |        |         |         |         |         |         |         |         |         |         |         |
| 366 | BPSL0335         |   |         |         |         |         |         |         |         |         |        |        |         |         |         |         |         |         |         |         |         |         |
| 367 | BPSL0336         |   |         |         |         |         |         |         |         |         |        |        |         |         |         |         |         |         |         |         |         |         |
| 368 | BPSL0337         |   |         |         |         |         |         |         |         |         |        |        |         |         |         |         |         |         |         |         |         |         |
| 369 | BPSL0338         |   |         |         |         |         |         |         |         |         |        |        |         |         |         |         |         |         |         |         |         |         |
| 370 | BPSL0339         |   |         |         |         |         |         |         |         |         |        |        |         |         |         |         |         |         |         |         |         |         |
| 371 | BPSL0340         |   |         |         |         |         |         |         |         |         |        |        |         |         |         |         |         |         |         |         |         |         |
| 372 | BPSL0341         |   |         |         |         |         |         |         |         |         |        |        |         |         |         |         |         |         |         |         |         |         |
| 373 | BPSL0342         |   |         |         |         |         |         |         |         |         |        |        |         |         |         |         |         |         |         |         |         |         |
| 374 | BPSL0343         |   |         |         |         |         |         |         |         |         |        |        |         |         |         |         |         |         |         |         |         |         |
| 375 | BPSL0344         |   |         |         |         |         |         |         |         |         |        |        |         |         |         |         |         |         |         |         |         |         |
| 376 | BPSL0345         |   |         |         |         |         |         |         |         |         |        |        |         |         |         |         |         |         |         |         |         |         |
| 377 | BPSL0346         |   |         |         |         |         |         |         |         |         |        |        |         |         |         |         |         |         |         |         |         |         |
| 378 | BPSL0347         |   |         |         |         |         |         |         |         |         |        |        |         |         |         |         |         |         |         |         |         |         |
| 379 | BPSL0348         |   |         |         |         |         |         |         |         |         |        |        |         |         |         |         |         |         |         |         |         |         |
| 380 | BPSL0349         |   |         |         |         |         |         |         |         |         |        |        |         |         |         |         |         |         |         |         |         |         |
| 381 | BPSL0350         |   |         |         |         |         |         |         |         |         |        |        |         |         |         |         |         |         |         |         |         |         |
| 382 | BPSL0352         |   |         |         |         |         |         |         |         |         |        |        |         |         |         |         |         |         |         |         |         |         |
| 383 | BPSL0353         |   |         |         |         |         |         |         |         |         |        |        |         |         |         |         |         |         |         |         |         |         |
| 384 | BPSL0354         |   |         |         |         |         |         |         |         |         |        |        |         |         |         |         |         |         |         |         |         |         |
| 385 | BPSL0355         |   |         |         |         |         |         |         |         |         |        |        |         |         |         |         |         |         |         |         |         |         |
| 386 | BPSL0356         |   |         |         |         |         |         |         |         |         |        |        |         |         |         |         |         |         |         |         |         |         |
| 387 | BPSL0357         |   |         |         |         |         |         |         |         |         |        |        |         |         |         |         |         |         |         |         |         |         |
| 388 | Chr1_21_IS407A_A |   | 123747  | 124982  | 3538554 | 3539789 | 3559432 | 3560667 | 123374  | 124609  | 118297 | 119532 | 2052526 | 2053761 | 2231283 | 2232518 | 3371851 | 3373086 | 3042799 | 3044034 | 174762  | 175997  |
| 389 | BPSL0358         | 9 | 123787  | 123260  | 3538594 | 3538067 | 3559472 | 3558945 | 123414  | 122887  | 118337 | 117810 | 2052566 | 2052039 | 2232478 | 2233005 | 3373079 | 3373573 | 3043994 | 3044521 | 174802  | 174275  |
| 390 | BPSL0359         | 9 | 122800  | 122423  | 3537607 | 3537230 | 3558485 | 3558108 | 122427  | 122050  | 117350 | 116973 | 2051579 | 2051202 | 2233465 | 2233842 | 3374033 | 3374410 | 3044981 | 3045358 | 173815  | 173438  |
| 391 | BPSL0360         | 9 | 122129  | 120693  | 3536936 | 3535500 | 3557814 | 3556378 | 121756  | 120320  | 116679 | 115243 | 2050903 | 2049467 | 2234141 | 2235577 | 3374709 | 3376145 | 3045652 | 3047088 | 173144  | 171708  |
| 392 | BPSL0361         | 9 | 120657  | 119257  | 3535464 | 3534064 | 3556342 | 3554942 | 120284  | 118884  | 115207 | 113807 | 2049431 | 2048031 | 2235613 | 2237013 | 3376181 | 3377581 | 3047124 | 3048524 | 171672  | 170272  |
| 393 | BPSL0362         | 9 | 119224  | 118415  | 3534031 | 3533222 | 3554909 | 3554100 | 118851  | 118042  | 113774 | 112965 | 2047998 | 2047189 | 2237046 | 2237855 | 3377614 | 3378423 | 3048557 | 3049366 | 170239  | 169430  |
| 394 | BPSL0363         | 9 | 118033  | 117323  | 3532840 | 3532130 | 3553718 | 3553008 | 117660  | 116950  | 112583 | 111873 | 2046807 | 2046097 | 2238237 | 2238947 | 3378805 | 3379515 | 3049748 | 3050458 | 169048  | 168338  |

|              |    |        |        |         |         |         |         |        |        |         |         |         |         |         |         |         |         |         |         |         |         |
|--------------|----|--------|--------|---------|---------|---------|---------|--------|--------|---------|---------|---------|---------|---------|---------|---------|---------|---------|---------|---------|---------|
| 395 BPSL0364 | 9  | 116174 | 117190 | 3530981 | 3531997 | 3551859 | 3552875 | 115801 | 116817 | 110724  | 111740  | 2044948 | 2045964 | 2240096 | 2239080 | 3380664 | 3379648 | 3051607 | 3050591 | 167189  | 168205  |
| 396 BPSL0365 | 9  | 115388 | 116107 | 3530195 | 3530914 | 3551073 | 3551792 | 115015 | 115734 | 109938  | 110657  | 2044162 | 2044881 | 2240882 | 2240163 | 3381450 | 3380731 | 3052393 | 3051674 | 166403  | 167122  |
| 397 BPSL0366 | 9  | 114207 | 115388 | 3529014 | 3530195 | 3549892 | 3551073 | 113834 | 115015 | 108757  | 109938  | 2042981 | 2044162 | 2242063 | 2240882 | 3382631 | 3381450 | 3053574 | 3052393 | 165222  | 166403  |
| 398 BPSL0367 | 9  | 112864 | 114207 | 3527671 | 3529014 | 3548549 | 3549892 | 112491 | 113834 | 107414  | 108757  | 2041638 | 2042981 | 2243406 | 2242063 | 3383974 | 3382631 | 3054917 | 3053574 | 163879  | 165222  |
| 399 BPSL0368 | 9  | 111024 | 112214 | 3525831 | 3527021 | 3546709 | 3547899 | 110651 | 111841 | 105567  | 106847  | 2039792 | 2041072 | 2245252 | 2243972 | 3385820 | 3384540 | 3056764 | 3055484 | 162032  | 163312  |
| 400 BPSL0369 | 9  | 110343 | 110792 | 3525150 | 3525599 | 3546028 | 3546477 | 109970 | 110419 | 104886  | 105335  | 2039111 | 2039560 | 2245933 | 2245484 | 3386501 | 3386052 | 3057445 | 3056996 | 161351  | 161800  |
| 401 BPSL0370 | 9  | 109628 | 110308 | 3524435 | 3525115 | 3545313 | 3545993 | 109255 | 109935 | 104171  | 104851  | 2038396 | 2039076 | 2246648 | 2245968 | 3387216 | 3386536 | 3058160 | 3057480 | 160636  | 161316  |
| 402 BPSL0371 | 9  | 108404 | 109594 | 3523211 | 3524401 | 3544089 | 3545279 | 108031 | 109221 | 102947  | 104137  | 2037172 | 2038362 | 2247872 | 2246682 | 3388440 | 3387250 | 3059382 | 3058246 | 159414  | 160550  |
| 403 BPSL0372 | 9  | 107647 | 108414 | 3522454 | 3523221 | 3543332 | 3544099 | 107274 | 108041 | 102190  | 102957  | 2036415 | 2037182 | 2248629 | 2247862 | 3389197 | 3388430 | 3060139 | 3059372 | 158657  | 159424  |
| 404 BPSL0373 | 9  | 105778 | 107586 | 3520585 | 3522393 | 3541463 | 3543271 | 105405 | 107213 | 100321  | 102129  | 2034546 | 2036354 | 2250498 | 2248690 | 3391066 | 3389258 | 3062008 | 3060200 | 156788  | 158596  |
| 405 BPSL0374 | 9  | 105488 | 104412 | 3520295 | 3519219 | 3541173 | 3540097 | 105115 | 104039 | 100031  | 98955   | 2034256 | 2033180 | 2250788 | 2251864 | 3391356 | 3392432 | 3062298 | 3063374 | 156498  | 155422  |
| 406 BPSL0375 | 9  | 102468 | 104111 | 3517275 | 3518918 | 3538153 | 3539796 | 102095 | 103738 | 97011   | 98654   | 2031236 | 2032879 | 2253808 | 2252165 | 3394376 | 3392733 | 3065318 | 3063675 | 153478  | 155121  |
| 407 BPSL0376 | 9  | 100648 | 102231 | 3515455 | 3517038 | 3536333 | 3537916 | 100275 | 101858 | 95191   | 96774   | 2029416 | 2030999 | 2255628 | 2254045 | 3396196 | 3394613 | 3067138 | 3065555 | 151658  | 153241  |
| 408 BPSL0377 | 9  |        |        |         |         |         |         |        |        |         |         |         |         |         |         |         |         |         |         |         |         |
| 409 BPSL0378 | 9  | 99670  | 100134 | 3514477 | 3514941 | 3535355 | 3535819 | 99297  | 99761  | 94213   | 94677   | 2028438 | 2028902 | 2256606 | 2256142 | 3397174 | 3396710 | 3068116 | 3067652 | 150680  | 151144  |
| 410 BPSL0379 | 9  | 99430  | 98720  | 3514237 | 3513527 | 3535115 | 3534405 | 99057  | 98347  | 93973   | 93263   | 2028198 | 2027488 | 2256846 | 2257547 | 3397414 | 3398124 | 3068356 | 3069066 | 150440  | 149730  |
| 411 BPSL0380 | 9  | 97785  | 98561  | 3512592 | 3513368 | 3533470 | 3534246 | 97412  | 98188  | 92328   | 93104   | 2026553 | 2027329 | 2258482 | 2257706 | 3399059 | 3398283 | 3070001 | 3069225 | 148795  | 149571  |
| 412 BPSL0381 | 9  | 97130  | 97765  | 3511937 | 3512572 | 3532815 | 3533450 | 96757  | 97392  | 91673   | 92308   | 2025898 | 2026533 | 2259137 | 2258502 | 3399714 | 3399079 | 3070656 | 3070021 | 148140  | 148775  |
| 413 BPSL0382 | 9  | 96230  | 97075  | 3511037 | 3511882 | 3531915 | 3532760 | 95857  | 96702  | 90773   | 91618   | 2024998 | 2025843 | 2260037 | 2259192 | 3400614 | 3399769 | 3071556 | 3070711 | 147240  | 148085  |
| 414 BPSL0383 | 9  | 94367  | 96148  | 3509174 | 3510955 | 3530052 | 3531833 | 93994  | 95775  | 88910   | 90691   | 2023135 | 2024916 | 2261900 | 2260119 | 3402477 | 3400696 | 3073419 | 3071638 | 145377  | 147158  |
| 415 BPSL0384 | 9  | 94164  | 93844  | 3508971 | 3508651 | 3529849 | 3529529 | 93791  | 93471  | 88707   | 88387   | 2022932 | 2022612 | 2262103 | 2262423 | 3402680 | 3403000 | 3073622 | 3073942 | 145174  | 144854  |
| 416          |    | 92218  | 93790  | 3507025 | 3508597 | 3527903 | 3529475 | 91845  | 93417  | 86761   | 88333   | 2020996 | 2022558 | 2262477 | 2264039 | 3403054 | 3404616 | 3073996 | 3075559 | 143964  | 144800  |
| 417          |    |        |        |         |         |         |         |        |        | 1369886 | 1371461 | 3182889 | 3184461 | 3100401 | 3101948 | 254941  | 256513  | 2490911 | 2492483 |         |         |
| 418 BPSL0385 | 10 | 89303  | 92002  | 3504110 | 3506809 | 3524988 | 3527687 | 88930  | 91629  | 83846   | 86545   | 1374376 | 1371677 | 3179974 | 3182673 | 3097442 | 3100141 | 252026  | 254725  | 2487996 | 2490695 |
| 419 BPSL0386 | 10 | 88163  | 89239  | 3502970 | 3504046 | 3523848 | 3524924 | 87790  | 88866  | 82706   | 83782   | 1375516 | 1374440 | 3178834 | 3179910 | 3096302 | 3097378 | 250886  | 251962  | 2486856 | 2487932 |
| 420 BPSL0387 | 10 | 87718  | 87972  | 3502525 | 3502779 | 3523403 | 3523625 | 87345  | 87599  | 82261   | 82515   | 1375961 | 1375700 | 3178389 | 3178643 | 3095857 | 3096111 | 250441  | 250695  | 2486411 | 2486665 |
| 421 BPSL0388 | 10 | 86267  | 87532  | 3501074 | 3502339 | 3521952 | 3523217 | 85894  | 87159  | 80810   | 82075   | 1377412 | 1376147 | 3176938 | 3178203 | 3094406 | 3095671 | 248990  | 250255  | 2484960 | 2486225 |
| 422 BPSL0389 | 10 | 85274  | 86134  | 3499558 | 3500121 | 3520959 | 3521819 | 84901  | 85761  | 79817   | 80677   | 1378405 | 1377545 | 3175945 | 3176805 | 3093413 | 3094273 | 247997  | 248857  | 2483967 | 2484827 |
| 423 BPSL0390 | 10 | 85164  | 84175  | 3499448 | 3498459 | 3520849 | 3519860 | 84791  | 83802  | 79707   | 78718   | 1378515 | 1379504 | 3175835 | 3174846 | 3093303 | 3092314 | 247887  | 246898  | 2483857 | 2482868 |
| 424 BPSL0391 | 10 | 83975  | 83151  | 3498259 | 3497435 | 3519660 | 3518836 | 83602  | 82778  | 78518   | 77694   | 1379704 | 1380528 | 3174646 | 3173822 | 3092114 | 3091290 | 246698  | 245874  | 2482668 | 2481844 |
| 425 BPSL0392 | 10 | 83058  | 82261  | 3497342 | 3496710 | 3518743 | 3518006 | 77601  | 76804  | 76806   | 76804   | 1380621 | 1381418 | 3173729 | 3172932 | 3091197 | 3090400 | 245781  | 244984  | 2481751 | 2481137 |
| 426 BPSL0393 | 10 | 82221  | 80980  | 3496139 | 3494898 | 3517123 | 3515882 | 81894  | 80653  | 76764   | 75523   | 1381458 | 1382699 | 3172892 | 3171651 | 3090360 | 3089119 | 244944  | 243703  | 143786  | 142545  |
| 427 BPSL0394 | 10 | 80404  | 79532  | 3494322 | 3493450 | 3515306 | 3514434 | 80077  | 79205  | 74932   | 74060   | 1383281 | 1384153 | 3171064 | 3170192 | 3088538 | 3087666 | 243127  | 242255  | 141969  | 141097  |
| 428 BPSL0395 | 10 | 79388  | 78906  | 3493306 | 3492824 | 3514290 | 3513808 | 79061  | 78579  | 73916   | 73434   | 1384297 | 1384779 | 3170048 | 3169566 | 3087522 | 3087040 | 242111  | 241629  | 140953  | 140471  |
| 429 BPSL0396 | 10 | 78423  | 78842  | 3492341 | 3492760 | 3513325 | 3513744 | 78096  | 78515  | 72951   | 73370   | 1385262 | 1384843 | 3169083 | 3169502 | 3086557 | 3086976 | 241146  | 241565  | 139988  | 140407  |
| 430 BPSL0397 | 10 | 77534  | 78310  | 3491452 | 3492228 | 3512436 | 3513212 | 77207  | 77983  | 72062   | 72838   | 1386151 | 1385375 | 3168194 | 3168970 | 3085668 | 3086444 | 240257  | 241033  | 139099  | 139875  |
| 431 BPSL0398 | 10 | 76578  | 77534  | 3490496 | 3491452 | 3511480 | 3512436 | 76251  | 77207  | 71106   | 72062   | 1387107 | 1386151 | 3167238 | 3168194 | 3084712 | 3085668 | 239301  | 240257  | 138143  | 139099  |
| 432 BPSL0399 | 10 | 75305  | 76189  | 3489223 | 3490107 | 3510207 | 3511091 | 74978  | 75862  | 69833   | 70717   | 1388380 | 1387496 | 3165965 | 3166849 | 3083439 | 3084323 | 238028  | 238912  | 136888  | 137754  |
| 433 BPSL0400 | 10 | 73171  | 75228  | 3486815 | 3488872 | 3507407 | 3509464 | 72844  | 74901  | 67641   | 69698   | 1390514 | 1388457 | 3163831 | 3165888 | 3081251 | 3083308 | 235894  | 237951  | 134716  | 136773  |
| 434 BPSL0401 | 10 | 72901  | 71780  | 3486545 | 3485424 | 3507137 | 3506016 | 72574  | 71453  | 67371   | 66250   | 1390788 | 1391909 | 3163557 | 3162436 | 3080977 | 3079856 | 235624  | 234503  | 134446  | 133325  |
| 435 BPSL0402 | 10 | 71780  | 70941  | 3485424 | 3484585 | 3506016 | 3505177 | 71453  | 70614  | 66250   | 65411   | 1391909 | 1392748 | 3162436 | 3161597 | 3079856 | 3079017 | 234503  | 233664  | 133325  | 132486  |
| 436 BPSL0403 | 10 | 70914  | 69988  | 3484558 | 3483632 | 3505150 | 3504224 | 70587  | 69661  | 65384   | 64458   | 1392775 | 1393701 | 3161570 | 3160644 | 3078990 | 3078064 | 233637  | 232711  | 132459  | 131533  |
| 437 BPSL0404 | 10 | 69951  | 69331  | 3483595 | 3482975 | 3504187 | 3503567 | 69624  | 69004  | 64421   | 63801   | 1393738 | 1394358 | 3160607 | 3159987 | 3078027 | 3077407 | 232674  | 232054  | 131496  | 130876  |
| 438 BPSL0405 | 10 | 69296  | 68100  | 3482940 | 3481744 | 3503532 | 3502936 | 68969  | 67773  | 63766   | 62570   | 1394393 | 1394662 | 3159952 | 3159683 | 3077372 | 3077103 | 232019  | 230823  | 130841  | 130572  |
| 439 BPSL0406 | 10 | 67992  | 67669  | 3481636 | 3481313 | 3501753 | 3501430 | 67665  | 67342  | 62462   | 62139   | 1395557 | 1395880 | 3158788 | 3158465 | 3076208 | 3075885 | 230715  | 230392  | 129465  | 129142  |
| 440 BPSL0407 | 10 | 67619  | 66978  | 3481263 | 3480622 | 3501380 | 3500739 | 67292  | 66651  | 62089   | 61448   | 1395930 | 1396571 | 3158415 | 3157774 | 3075835 | 3075194 | 230342  | 229701  | 129092  | 128451  |
| 441 BPSL0408 | 10 | 66107  | 64899  | 3479751 | 3478543 | 3499868 | 3498660 | 65779  | 64571  | 60596   | 59388   | 1397461 | 1398669 | 3156915 | 3155707 | 3074304 | 3073096 | 228854  | 227646  | 127616  | 126408  |
| 442 BPSL0409 | 10 | 64806  | 63862  | 3478450 | 3477506 | 3498567 | 3497623 | 64478  | 63534  | 59295   | 58351   | 1398762 | 1399706 | 3155614 | 3154670 | 3073003 | 3072059 | 227553  | 226609  | 126315  | 125371  |
| 443 BPSL0410 | 10 | 63862  | 63557  | 3477506 | 3477201 | 3497623 | 3497318 | 63534  | 63229  | 58351   | 58046   | 1399706 | 1400011 | 3154670 | 3154365 | 3072059 | 3071754 | 226609  | 226304  | 125371  | 125066  |
| 444 BPSL0411 | 10 | 62578  | 63540  | 3476222 | 3477184 | 3496339 | 3497301 | 62250  | 63212  | 57067   | 58029   | 1400990 | 1400028 | 3153386 |         |         |         |         |         |         |         |



|     |                   |    |         |         |         |         |         |         |         |         |         |         |         |         |         |         |         |         |        |        |         |         |
|-----|-------------------|----|---------|---------|---------|---------|---------|---------|---------|---------|---------|---------|---------|---------|---------|---------|---------|---------|--------|--------|---------|---------|
| 446 | BPSL0413          | 10 | 61986   | 61312   | 3475630 | 3474956 | 3495747 | 3495073 | 61658   | 60984   | 56475   | 55801   | 1401582 | 1402256 | 3152794 | 3152120 | 3070183 | 3069509 | 224733 | 224059 | 123495  | 122821  |
| 447 | BPSL0414          | 10 | 61316   | 60330   | 3474960 | 3473974 | 3495077 | 3494091 | 60988   | 60002   | 55805   | 54819   | 1402252 | 1403238 | 3152124 | 3151138 | 3069513 | 3068527 | 224063 | 223077 | 122825  | 121839  |
| 448 | Chr1_23a_ISBma2_A |    | 58691   | 60263   | 3472335 | 3473907 | 3492452 | 3494024 | 58363   | 59935   | 53180   | 54752   | 1403305 | 1404881 | 3149499 | 3151071 | 3066888 | 3068460 | 221439 | 223010 | 120201  | 121772  |
| 449 | Chr1_23b_ISBma2_A |    | 3346749 | 3348321 | 3247169 | 3248741 | 3265431 | 3267003 | 3333036 | 3334608 | 3421617 | 3423189 |         |         | 2756502 | 2758099 |         |         |        |        |         |         |
| 450 | BPSL0415          | 11 | 3346239 | 3346616 | 3246659 | 3247036 | 3264921 | 3265298 | 3332526 | 3332903 | 3421107 | 3421484 | 1405391 | 1405014 | 2758609 | 2758232 |         |         | 220929 | 221306 | 119691  | 120068  |
| 451 | BPSL0416          | 11 | 3344336 | 3346216 | 3244756 | 3246636 | 3263018 | 3264898 | 3330623 | 3332503 | 3419204 | 3421084 | 1407294 | 1405414 | 2760512 | 2758632 |         |         | 219026 | 220906 | 117788  | 119668  |
| 452 | BPSL0417          | 11 | 3343492 | 3343154 | 3243912 | 3243574 | 3262174 | 3261836 | 3329779 | 3329441 | 3418368 | 3418030 | 1408130 | 1408468 | 2761340 | 2761678 |         |         | 218190 | 217852 | 116952  | 116614  |
| 453 | BPSL0418          | 11 | 3342140 | 3343039 | 3242560 | 3243459 | 3260822 | 3261721 | 3328427 | 3329326 | 3417017 | 3417916 | 1409480 | 1408581 | 2762690 | 2761791 |         |         | 216839 | 217738 | 115601  | 116500  |
| 454 | BPSL0419          | 11 | 3341985 | 3339862 | 3242405 | 3240282 | 3260667 | 3258544 | 3328272 | 3326149 | 3416862 | 3414739 | 1409635 | 1411758 | 2762845 | 2764968 |         |         | 216684 | 214561 | 115446  | 113323  |
| 455 | BPSL0420          | 11 | 3339804 | 3338599 | 3240224 | 3239019 | 3258486 | 3257281 | 3326091 | 3324886 | 3414681 | 3413476 | 1411816 | 1413021 | 2765026 | 2766231 |         |         | 214503 | 213298 | 113265  | 112060  |
| 456 | BPSL0421          | 11 | 3338586 | 3337459 | 3239006 | 3237879 | 3257268 | 3256141 | 3324873 | 3323746 | 3413463 | 3412336 | 1413034 | 1414161 | 2766244 | 2767371 |         |         | 213285 | 212158 | 112047  | 110920  |
| 457 | BPSL0422          | 11 | 3337430 | 3336228 | 3237850 | 3236648 | 3256112 | 3254910 | 3323717 | 3322515 | 3412307 | 3411105 | 1414190 | 1415392 | 2767400 | 2768602 |         |         | 212129 | 210927 | 110891  | 109689  |
| 458 | BPSL0423          | 11 | 3335938 | 3335636 | 3236358 | 3236056 | 3254620 | 3254318 | 3322225 | 3321923 | 3410815 | 3410513 | 1415682 | 1415984 | 2768892 | 2769194 |         |         | 210637 | 210335 | 109399  | 109097  |
| 459 | BPSL0424          | 11 | 3335621 | 3333909 | 3236041 | 3234329 | 3254303 | 3252591 | 3321908 | 3320196 | 3410498 | 3408786 | 1415999 | 1417711 | 2769209 | 2770921 |         |         | 210320 | 208608 | 109082  | 107370  |
| 460 | BPSL0425          | 11 | 3333538 | 3332255 | 3233958 | 3232975 | 3252220 | 3250937 | 3319825 | 3318542 | 3408415 | 3407132 | 1418082 | 1419365 | 2771292 | 2772575 |         |         | 208237 | 206594 | 106999  | 105716  |
| 461 | BPSL0426          | 11 | 3332249 | 3331320 | 3232669 | 3232619 | 3250931 | 3250875 | 3318536 | 3318486 | 3407126 | 3407052 | 1419371 | 1420300 | 2772581 | 2773510 |         |         | 206948 | 206019 | 3369480 | 3368641 |
| 462 | BPSL0427          | 11 | 3330237 | 3328885 | 3230390 | 3229038 | 3248281 | 3246929 | 3316514 | 3315162 | 3404276 | 3402924 | 1421383 | 1422735 | 2774593 | 2775945 |         |         | 204936 | 203584 | 3367558 | 3366206 |
| 463 | BPSL0428          | 11 | 3328230 | 3328763 | 3228383 | 3228916 | 3246274 | 3246807 | 3314507 | 3315040 | 3402269 | 3402802 | 1423390 | 1422857 | 2776600 | 2776067 |         |         | 202929 | 203462 | 3365551 | 3366084 |
| 464 | BPSL0429          | 11 | 3327937 | 3327350 | 3228090 | 3227503 | 3245981 | 3245394 | 3314214 | 3313627 | 3401976 | 3401389 | 1423683 | 1424270 | 2776893 | 2777480 |         |         | 202636 | 202049 | 3365258 | 3364671 |
| 465 | BPSL0430          | 11 | 3325903 | 3326679 | 3226056 | 3226832 | 3243947 | 3244723 | 3312180 | 3312956 | 3399942 | 3400718 | 1425717 | 1424941 | 2778927 | 2778151 |         |         | 200602 | 201378 | 3363224 | 3364000 |
| 466 | BPSL0431          | 11 | 3325404 | 3324943 | 3225557 | 3225096 | 3243448 | 3242987 | 3311681 | 3311220 | 3399443 | 3398982 | 1426224 | 1426685 | 2779442 | 2779903 |         |         | 200103 | 199642 | 3362725 | 3362264 |
| 467 | BPSL0432          | 11 | 3322939 | 3324522 | 3223092 | 3224675 | 3240983 | 3242566 | 3309216 | 3310799 | 3396978 | 3398561 | 1426869 | 1427106 | 2781907 | 2780324 |         |         | 197638 | 199221 | 3360260 | 3361843 |
| 468 | BPSL0433          | 11 | 3322550 | 3322798 | 3222703 | 3222951 | 3240594 | 3240842 | 3308827 | 3309075 | 3396589 | 3396837 | 1429078 | 1428830 | 2782296 | 2782048 |         |         | 197249 | 197497 | 3359871 | 3360119 |
| 469 | BPSL0434          | 11 | 3322181 | 3321846 | 3222334 | 3221999 | 3240225 | 3239890 | 3308458 | 3308123 | 3396220 | 3395885 | 1429447 | 1429782 | 2782665 | 2783000 |         |         | 196880 | 196545 | 3359502 | 3359167 |
| 470 | BPSL0435          | 11 | 3321780 | 3320413 | 3221933 | 3220566 | 3239824 | 3238457 | 3308057 | 3306690 | 3395819 | 3394452 | 1429848 | 1431215 | 2783066 | 2784433 |         |         | 196479 | 195112 | 3359101 | 3357734 |
| 471 | Chr1_24_ISBma2_A  |    | 3318742 | 3320313 | 3218895 | 3220466 | 3236786 | 3238357 | 3305019 | 3306590 | 3392781 | 3394352 | 1432886 | 1432917 | 2784533 | 2786105 | 3066888 | 3068460 | 193441 | 195012 | 3356063 | 3357634 |
| 472 | BPSL0436          | 11 | 3318485 | 3317160 | 3218638 | 3217313 | 3236529 | 3235204 | 3304762 | 3303437 | 3392524 | 3391199 | 1433174 | 1434499 | 2786362 | 2787687 | 3066631 | 3065306 | 193184 | 191859 | 3355806 | 3354481 |
| 473 | BPSL0437          | 11 | 3317129 | 3316176 | 3217282 | 3216329 | 3235173 | 3234220 | 3303406 | 3302453 | 3391168 | 3390215 | 1434530 | 1435483 | 2787718 | 2788671 | 3065275 | 3064322 | 191828 | 190875 | 3354450 | 3353497 |
| 474 | BPSL0438          | 11 | 3316000 | 3315530 | 3216153 | 3215683 | 3234044 | 3233574 | 3302277 | 3301807 | 3390039 | 3389569 | 1435659 | 1436129 | 2788847 | 2789317 | 3064146 | 3063676 | 190699 | 190229 | 3353321 | 3352851 |
| 475 | BPSL0439          | 11 | 3315450 | 3315184 | 3215603 | 3215337 | 3233494 | 3233228 | 3301727 | 3301461 | 3389489 | 3389223 | 1436209 | 1436475 | 2789397 | 2789663 | 3063596 | 3063330 | 190149 | 189883 | 3352771 | 3352505 |
| 476 | BPSL0440          | 11 | 3314985 | 3313216 | 3215138 | 3213369 | 3233029 | 3231260 | 3301262 | 3299493 | 3389024 | 3387255 | 1436674 | 1438443 | 2789862 | 2791631 | 3063131 | 3061362 | 189684 | 187915 | 3352306 | 3350537 |
| 477 | BPSL0441          | 11 | 3312233 | 3312988 | 3212386 | 3213141 | 3230277 | 3231032 | 3298510 | 3299265 | 3386272 | 3387027 | 1439432 | 1438677 | 2792614 | 2791859 | 3060379 | 3061134 | 186932 | 187687 | 3349554 | 3350309 |
| 478 | BPSL0442          | 11 | 3310554 | 3312125 | 3210707 | 3212278 | 3228598 | 3230169 | 3296831 | 3298402 | 3384593 | 3386164 | 1441111 | 1439540 | 2794293 | 2792722 | 3058700 | 3060271 | 185253 | 186824 | 3347875 | 3349446 |
| 479 | BPSL0443          | 11 | 3309584 | 3310330 | 3210737 | 3210483 | 3227628 | 3228374 | 3295861 | 3296607 | 3383623 | 3384369 | 1442081 | 1441335 | 2795263 | 2794517 | 3057730 | 3058476 | 184283 | 185029 | 3346905 | 3347651 |
| 480 | BPSL0444          | 11 | 3309450 | 3309046 | 3209603 | 3209199 | 3227494 | 3227090 | 3295727 | 3295323 | 3383489 | 3383085 | 1442215 | 1442619 | 2795397 | 2795801 | 3057596 | 3057192 | 184149 | 183745 | 3346771 | 3346367 |
| 481 | BPSL0445          | 11 | 3309031 | 3308774 | 3209184 | 3208927 | 3227075 | 3226818 | 3295308 | 3295051 | 3383070 | 3382813 | 1442634 | 1442891 | 2795816 | 2796073 | 3057177 | 3056920 | 183730 | 183473 | 3346352 | 3346095 |
| 482 | BPSL0446          | 11 | 3308654 | 3308178 | 3208807 | 3208331 | 3226698 | 3226222 | 3294931 | 3294455 | 3382693 | 3382217 | 1443011 | 1443487 | 2796193 | 2796669 | 3056800 | 3056324 | 183353 | 182877 | 3345975 | 3345499 |
| 483 | BPSL0447          | 11 | 3308149 | 3307154 | 3208302 | 3207307 | 3226193 | 3225393 | 3294426 | 3293431 | 3382188 | 3381193 | 1443516 | 1444511 | 2796698 | 2797693 | 3056295 | 3055300 | 182848 | 181853 | 3345470 | 3344475 |
| 484 | BPSL0448          | 11 | 3306998 | 3306468 | 3207151 | 3206621 | 3224192 | 3223662 | 3293275 | 3292745 | 3381037 | 3380507 | 1444667 | 1445197 | 2797849 | 2798379 | 3055144 | 3054614 | 181697 | 181167 | 3344319 | 3343789 |
| 485 | BPSL0449          | 11 | 3305575 | 3306042 | 3205728 | 3206195 | 3222769 | 3223236 | 3291852 | 3292319 | 3379614 | 3380081 | 1446090 | 1445623 | 2799272 | 2798805 | 3053721 | 3054188 | 180274 | 180741 | 3342896 | 3343363 |
| 486 | BPSL0450          | 11 | 3304791 | 3305516 | 3204944 | 3205669 | 3221985 | 3222710 | 3291068 | 3291793 | 3378830 | 3379555 | 1446874 | 1446149 | 2800056 | 2799331 | 3052937 | 3053662 | 179490 | 180215 | 3342112 | 3342837 |
| 487 | BPSL0451          | 11 | 3304668 | 3303706 | 3204821 | 3203859 | 3221862 | 3220900 | 3290945 | 3289983 | 3378707 | 3377745 | 1446997 | 1447959 | 2800179 | 2801141 | 3052814 | 3051852 | 179367 | 178405 | 3341989 | 3341027 |
| 488 | BPSL0452          | 11 | 3303505 | 3302993 | 3203658 | 3203146 | 3220699 | 3220187 | 3289782 | 3289270 | 3377544 | 3377032 | 1448160 | 1448672 | 2801342 | 2801854 | 3051651 | 3051139 | 178204 | 177692 | 3340826 | 3340314 |
| 489 | BPSL0453          | 11 | 3302940 | 3301366 | 3203093 | 3201519 | 3220134 | 3218560 | 3289217 | 3287643 | 3376979 | 3375405 | 1448725 | 1450299 | 2801907 | 2803481 | 3051086 | 3049512 | 177639 | 176065 | 3340261 | 3338687 |
| 490 | BPSL0454          | 11 | 3301319 | 3299715 | 3201472 | 3199868 | 3218513 | 3216909 | 3287596 | 3285992 | 3375358 | 3373754 | 1450346 | 1451590 | 2803528 | 2805132 | 3049465 | 3047861 | 176018 | 174414 | 3338640 | 3337036 |
| 491 | BPSL0455          | 11 | 3299643 | 3299506 | 3199796 | 3199659 | 3216837 | 3216700 | 3285920 | 3285783 | 3373682 | 3373545 | 1452022 | 1452159 | 2805204 | 2805341 | 3047789 | 3047652 | 174342 | 174205 | 3336964 | 3336827 |
| 492 | BPSL0456          | 11 | 3299481 | 3298879 | 3199634 | 3199032 | 3216675 | 3216073 | 3285758 | 3285156 | 3373520 | 3372918 | 1452184 | 1452786 | 2805366 | 2805968 | 3047627 | 3047025 | 174180 | 173578 | 3336802 | 3336200 |
| 493 | BPSL0457          | 11 | 3298856 | 3298659 | 3199009 | 3198812 | 3216050 | 3215853 | 3285133 | 3284936 | 3372895 | 3372698 | 1452809 |         |         |         |         |         |        |        |         |         |

|     |                   |    |         |         |         |         |         |         |         |         |         |         |         |         |         |         |         |         |        |        |         |         |
|-----|-------------------|----|---------|---------|---------|---------|---------|---------|---------|---------|---------|---------|---------|---------|---------|---------|---------|---------|--------|--------|---------|---------|
| 497 | BPSL0460          | 11 | 3296432 | 3295791 | 3196585 | 3195944 | 3213626 | 3212985 | 3282709 | 3282068 | 3370471 | 3369830 | 1455233 | 1455874 | 2808415 | 2809056 | 3044578 | 3043937 | 171131 | 170490 | 3333753 | 3333112 |
| 498 | BPSL0461          | 11 | 3295684 | 3294638 | 3195837 | 3194791 | 3212878 | 3211832 | 3281961 | 3280915 | 3369723 | 3368677 | 1455981 | 1457027 | 2809163 | 2810209 | 3043830 | 3042784 | 170383 | 169337 | 3333005 | 3331959 |
| 499 | BPSL0462          | 11 | 3294622 | 3293723 | 3194775 | 3193876 | 3211816 | 3210917 | 3280899 | 3280000 | 3368661 | 3367762 | 1457043 | 1457942 | 2810225 | 2811124 | 3042768 | 3041869 | 169321 | 168422 | 3331943 | 3331044 |
| 500 | BPSL0463          | 11 | 3293700 | 3293086 | 3193853 | 3193239 | 3210894 | 3210280 | 3279977 | 3279363 | 3367739 | 3367125 | 1457965 | 1458579 | 2811147 | 2811761 | 3041846 | 3041232 | 168399 | 167785 | 3331021 | 3330407 |
| 501 | BPSL0464          | 11 | 3292710 | 3293000 | 3192410 | 3192700 | 3209303 | 3209593 | 3278962 | 3279252 | 3366678 | 3366968 | 1458955 | 1458665 | 2812137 | 2811847 | 3040856 | 3041146 | 167409 | 167699 | 3329553 | 3329843 |
| 502 | BPSL0465          | 11 | 3292523 | 3290886 | 3192223 | 3190586 | 3209116 | 3207479 | 3278775 | 3277138 | 3366491 | 3364854 | 1459142 | 1460779 | 2812324 | 2813961 | 3040669 | 3039032 | 167222 | 165585 | 3329366 | 3327729 |
| 503 | BPSL0466          | 11 | 3290733 | 3289918 | 3190433 | 3189618 | 3207326 | 3206511 | 3276985 | 3276170 | 3364701 | 3363886 | 1460932 | 1461747 | 2814114 | 2814929 | 3038879 | 3038064 | 165432 | 164617 | 3327576 | 3326761 |
| 504 | Chr1_25a_ISBma2_A |    | 3288285 | 3289857 | 3187985 | 3189557 | 3204878 | 3206450 | 3274537 | 3276109 | 3362254 | 3363825 | 1461808 | 1463379 | 2814990 | 2816561 | 3036431 | 3038003 | 163290 | 164556 | 3325434 | 3326700 |
| 505 | Chr1_25b_ISBma2_A |    | 3235804 | 3237379 | 3135195 | 3136770 | 3152397 | 3153972 | 3222056 | 3223631 | 3309804 | 3311376 | 1514301 | 1515875 | 2867420 | 2868994 | 2983988 | 2985560 | 109336 | 110910 | 3271661 | 3273235 |
| 506 | BPSL0467          | 12 | 3237596 | 3238564 | 3136987 | 3137955 | 3154189 | 3155157 | 3223848 | 3224816 | 3311593 | 3312561 | 1514084 | 1513116 | 2867203 | 2866235 | 2985777 | 2986745 | 111127 | 112095 | 3273452 | 3274420 |
| 507 | BPSL0468          | 12 | 3238916 | 3239809 | 3138307 | 3139200 | 3155509 | 3156402 | 3225168 | 3226061 | 3312903 | 3313796 | 1512784 | 1511891 | 2865903 | 2865010 | 2987077 | 2987970 | 112427 | 113320 | 3274752 | 3275645 |
| 508 | BPSL0469          | 12 | 3239813 | 3240604 | 3139204 | 3139995 | 3156406 | 3157197 | 3226065 | 3226856 | 3313800 | 3314591 | 1511887 | 1511096 | 2865006 | 2864215 | 2987974 | 2988765 | 113324 | 114115 | 3275649 | 3276440 |
| 509 | BPSL0470          | 12 | 3240814 | 3241521 | 3140205 | 3140912 | 3157407 | 3158114 | 3227066 | 3227773 | 3314801 | 3315508 | 1510886 | 1510179 | 2864005 | 2863298 | 2988975 | 2989682 | 114325 | 115032 | 3276650 | 3277171 |
| 510 | BPSL0471          | 12 | 3241457 | 3242929 | 3140848 | 3142320 | 3158050 | 3159522 | 3227709 | 3229181 | 3315444 | 3316916 | 1510243 | 1508771 | 2863362 | 2861890 | 2989618 | 2991090 | 114968 | 116440 | 3277274 | 3278548 |
| 511 | BPSL0472          | 12 | 3242938 | 3246126 | 3142329 | 3145517 | 3159531 | 3162719 | 3229190 | 3232378 | 3316925 | 3320113 | 1508762 | 1505574 | 2861881 | 2858693 | 2991099 | 2994287 | 116449 | 119637 | 3278557 | 3281745 |
| 512 | BPSL0473          | 12 | 3247279 | 3246461 | 3146670 | 3145852 | 3163872 | 3163054 | 3233531 | 3232713 | 3321266 | 3320448 | 1504421 | 1505239 | 2857540 | 2858358 | 2995431 | 2994613 | 120790 | 119972 | 3282898 | 3282080 |
| 513 | BPSL0474          | 12 | 3248516 | 3247326 | 3147907 | 3146717 | 3165109 | 3163919 | 3234768 | 3233578 | 3322503 | 3321313 | 1503184 | 1504374 | 2856303 | 2857493 | 2996668 | 2995478 | 122027 | 120837 | 3284135 | 3282945 |
| 514 | BPSL0475          | 12 | 3249749 | 3248721 | 3149140 | 3148112 | 3166342 | 3165314 | 3236001 | 3234973 | 3323736 | 3322708 | 1501951 | 1502979 | 2855070 | 2856098 | 2997901 | 2996873 | 123260 | 122232 | 3285368 | 3284340 |
| 515 | BPSL0476          | 12 | 3251147 | 3249798 | 3150538 | 3149189 | 3167740 | 3166391 | 3237399 | 3236050 | 3325134 | 3323785 | 1500553 | 1501902 | 2853672 | 2855021 | 2999299 | 2997950 | 124658 | 123309 | 3286766 | 3285417 |
| 516 | BPSL0477          | 12 | 3251725 | 3251195 | 3151116 | 3150586 | 3168318 | 3167788 | 3237977 | 3237447 | 3325712 | 3325182 | 1499975 | 1500505 | 2853094 | 2853624 | 2999877 | 2999347 | 125236 | 124706 | 3287344 | 3286814 |
| 517 | BPSL0478          | 12 | 3252891 | 3251803 | 3152282 | 3151194 | 3169484 | 3168396 | 3239143 | 3238055 | 3326878 | 3325790 | 1498809 | 1499897 | 2851928 | 2853016 | 3001043 | 2999955 | 126402 | 125314 | 3288510 | 3287422 |
| 518 | BPSL0479          | 12 | 3253840 | 3252887 | 3153231 | 3152278 | 3170433 | 3169480 | 3240092 | 3239139 | 3327827 | 3326874 | 1497860 | 1498813 | 2850979 | 2851932 | 3001992 | 3001039 | 127351 | 126398 | 3289459 | 3288506 |
| 519 | BPSL0480          | 12 | 3255027 | 3253963 | 3154418 | 3153354 | 3171620 | 3170556 | 3241279 | 3240215 | 3329014 | 3327950 | 1498762 | 1497737 | 2849792 | 2850856 | 3003179 | 3002115 | 128538 | 127474 | 3290646 | 3289582 |
| 520 | BPSL0481          | 12 | 3255689 | 3255027 | 3155080 | 3154418 | 3172282 | 3171620 | 3241941 | 3241279 | 3329676 | 3329014 | 1496011 | 1496673 | 2849130 | 2849792 | 3003841 | 3003179 | 129200 | 128538 | 3291308 | 3290646 |
| 521 | BPSL0482          | 12 | 3256880 | 3255732 | 3156271 | 3155123 | 3173473 | 3172325 | 3243132 | 3241984 | 3330867 | 3329719 | 1494820 | 1495968 | 2847939 | 2849087 | 3005032 | 3003884 | 130391 | 129243 | 3292499 | 3291351 |
| 522 | BPSL0483          | 12 | 3258753 | 3256885 | 3158144 | 3156276 | 3175346 | 3173478 | 3245005 | 3243137 | 3332740 | 3330872 | 1492947 | 1494815 | 2846066 | 2847934 | 3006905 | 3005037 | 132264 | 130396 | 3294372 | 3292504 |
| 523 | BPSL0484          | 12 | 3259790 | 3258753 | 3159181 | 3158144 | 3176383 | 3175346 | 3246042 | 3245005 | 3333777 | 3332740 | 1491910 | 1492947 | 2845029 | 2846066 | 3007942 | 3006905 | 133301 | 132264 | 3295409 | 3293472 |
| 524 | BPSL0485          | 12 | 3261376 | 3259811 | 3160767 | 3159202 | 3177969 | 3176404 | 3247628 | 3246063 | 3335363 | 3333798 | 1490324 | 1491889 | 2843443 | 2845008 | 3009528 | 3007963 | 134887 | 133322 | 3296995 | 3295430 |
| 525 | BPSL0486          | 12 | 3262580 | 3261387 | 3161971 | 3160778 | 3179173 | 3177980 | 3248832 | 3247639 | 3336567 | 3335374 | 1489120 | 1490313 | 2842239 | 2843432 | 3010732 | 3009539 | 136091 | 134898 | 3298199 | 3297006 |
| 526 | BPSL0487          | 12 | 3263568 | 3262573 | 3162959 | 3161964 | 3180161 | 3179166 | 3249820 | 3248825 | 3337555 | 3336560 | 1488132 | 1489127 | 2841251 | 2842246 | 3011720 | 3010725 | 137079 | 136084 | 3299187 | 3298192 |
| 527 | BPSL0488          | 12 | 3264514 | 3263576 | 3163905 | 3162967 | 3181107 | 3180169 | 3250766 | 3249828 | 3338501 | 3337563 | 1487186 | 1488124 | 2840305 | 2841243 | 3012666 | 3011728 | 138025 | 137087 | 3300133 | 3299195 |
| 528 | BPSL0489          | 12 | 3265141 | 3264578 | 3164532 | 3163969 | 3181734 | 3181171 | 3251393 | 3250830 | 3339128 | 3338565 | 1486559 | 1487122 | 2839678 | 2840241 | 3013293 | 3012730 | 138652 | 138089 | 3300760 | 3300197 |
| 529 | BPSL0490          | 12 | 3266025 | 3265141 | 3165416 | 3164532 | 3182618 | 3181734 | 3252277 | 3251393 | 3340012 | 3339128 | 1485675 | 1486559 | 2838794 | 2839678 | 3014177 | 3013293 | 139536 | 138652 | 3301644 | 3300760 |
| 530 | BPSL0491          | 12 | 3266306 | 3266061 | 3165697 | 3165452 | 3182899 | 3182654 | 3252558 | 3252313 | 3340293 | 3340048 | 1485394 | 1485639 | 2838513 | 2838758 | 3014458 | 3014213 | 139817 | 139572 | 3301925 | 3301680 |
| 531 | BPSL0492          | 12 | 3267546 | 3266365 | 3166937 | 3165756 | 3184139 | 3182958 | 3253798 | 3252617 | 3341533 | 3340352 | 1484154 | 1485335 | 2837273 | 2838454 | 3015698 | 3014517 | 141057 | 139876 | 3303165 | 3301984 |
| 532 | BPSL0493          | 12 | 3269309 | 3267546 | 3168700 | 3166937 | 3185902 | 3184139 | 3255561 | 3253798 | 3343296 | 3341533 | 1482391 | 1484154 | 2835510 | 2837273 | 3017461 | 3015698 | 142820 | 141057 | 3304928 | 3303165 |
| 533 | BPSL0494          | 12 | 3269743 | 3270663 | 3169134 | 3170054 | 3186336 | 3187256 | 3255995 | 3256915 | 3343730 | 3344650 | 1481957 | 1481037 | 2835076 | 2834156 | 3017895 | 3018815 | 143254 | 144174 | 3305362 | 3306282 |
| 534 | BPSL0495          | 12 | 3271372 | 3272133 | 3170763 | 3171524 | 3187965 | 3188726 | 3257624 | 3258385 | 3345359 | 3346120 | 1480328 | 1479567 | 2833447 | 2832686 | 3019524 | 3020285 | 144883 | 145644 | 3306991 | 3307752 |
| 535 | BPSL0496          | 12 | 3272235 | 3273335 | 3171626 | 3172726 | 3188828 | 3189928 | 3258487 | 3259587 | 3346222 | 3347322 | 1479465 | 1478365 | 2832584 | 2831484 | 3020387 | 3021487 | 145746 | 146846 | 3307854 | 3308954 |
| 536 | BPSL0497          | 12 | 3273322 | 3274335 | 3172713 | 3173726 | 3189915 | 3190928 | 3259574 | 3260587 | 3347309 | 3348322 | 1478378 | 1477365 | 2831497 | 2830484 | 3021474 | 3022487 | 146833 | 147846 | 3308941 | 3309954 |
| 537 | BPSL0498          | 12 | 3274372 | 3276987 | 3173763 | 3173945 | 3190965 | 3193580 | 3260624 | 3262329 | 3348359 | 3350974 | 1477328 | 1474713 | 2830447 | 2827832 | 3022524 | 3025139 | 147883 | 150498 | 3309991 | 3312606 |
| 538 | BPSL0499          | 12 | 3277091 | 3278866 | 3176791 | 3178566 | 3193684 | 3195459 | 3263343 | 3265118 | 3351078 | 3352853 | 1474609 | 1472814 | 2827728 | 2825953 | 3025243 | 3027018 | 150603 | 152377 | 3312710 | 3314485 |
| 539 | BPSL0500          | 12 | 3281972 | 3279474 | 3181672 | 3179174 | 3198565 | 3196067 | 3268224 | 3265726 | 3355959 | 3353461 | 1469665 | 1472163 | 2822847 | 2825345 | 3030145 | 3027647 | 155504 | 153006 | 3317612 | 3315114 |
| 540 | BPSL0501          | 12 | 3284624 | 3283491 | 3184324 | 3183191 | 3201217 | 3200084 | 3270876 | 3269743 | 3358593 | 3357460 | 1467040 | 1468173 | 2820222 | 2821355 | 3032770 | 3031637 | 158156 | 157023 | 3320300 | 3319167 |
| 541 | BPSL0502          | 12 | 3286257 | 3284665 | 3185957 | 3184365 | 3202850 | 3201258 | 3272509 | 3270917 | 3360226 | 3358634 | 1465407 | 1466999 | 2818589 | 2820181 | 3034403 | 3032811 | 159789 | 158197 | 3321933 | 3320341 |
| 542 | BPSL0503          | 12 | 3286531 | 3286250 | 3186231 | 3185950 | 3203124 | 3202843 | 3272783 | 3272502 | 3360500 | 3360219 | 1465133 | 1465414 | 2818315 | 2818596 | 3034677 | 3034396 | 160063 | 159    |         |         |





|     |                  |     |      |       |         |         |         |         |         |       |        |        |         |         |         |         |         |         |         |         |         |       |       |
|-----|------------------|-----|------|-------|---------|---------|---------|---------|---------|-------|--------|--------|---------|---------|---------|---------|---------|---------|---------|---------|---------|-------|-------|
| 599 | BPSL0555         | GI3 |      |       |         |         |         |         |         |       |        |        |         |         |         |         |         |         |         |         |         |       |       |
| 600 | BPSL0556         | GI3 |      |       |         |         |         |         |         |       |        |        |         |         |         |         |         |         |         |         |         |       |       |
| 601 | BPSL0557         | GI3 |      |       |         |         |         |         |         |       |        |        |         |         |         |         |         |         |         |         |         |       |       |
| 602 | BPSL0558         | GI3 |      |       |         |         |         |         |         |       |        |        |         |         |         |         |         |         |         |         |         |       |       |
| 603 | BPSL0559         | GI3 |      |       |         |         |         |         |         |       |        |        |         |         |         |         |         |         |         |         |         |       |       |
| 604 | BPSL0560         | GI3 |      |       |         |         |         |         |         |       |        |        |         |         |         |         |         |         |         |         |         |       |       |
| 605 | BPSL0561         | GI3 |      |       |         |         |         |         |         |       |        |        |         |         |         |         |         |         |         |         |         |       |       |
| 606 | BPSL0562         | GI3 |      |       |         |         |         |         |         |       |        |        |         |         |         |         |         |         |         |         |         |       |       |
| 607 | BPSL0563         | GI3 |      |       |         |         |         |         |         |       |        |        |         |         |         |         |         |         |         |         |         |       |       |
| 608 | BPSL0564         | GI3 |      |       |         |         |         |         |         |       |        |        |         |         |         |         |         |         |         |         |         |       |       |
| 609 | BPSL0565         | GI3 |      |       |         |         |         |         |         |       |        |        |         |         |         |         |         |         |         |         |         |       |       |
| 610 | BPSL0566         | GI3 |      |       |         |         |         |         |         |       |        |        |         |         |         |         |         |         |         |         |         |       |       |
| 611 | BPSL0567         | GI3 |      |       |         |         |         |         |         |       |        |        |         |         |         |         |         |         |         |         |         |       |       |
| 612 | BPSL0568         | GI3 |      |       |         |         |         |         |         |       |        |        |         |         |         |         |         |         |         |         |         |       |       |
| 613 | BPSL0569         | GI3 |      |       |         |         |         |         |         |       |        |        |         |         |         |         |         |         |         |         |         |       |       |
| 614 | BPSL0570         | GI3 |      |       |         |         |         |         |         |       |        |        |         |         |         |         |         |         |         |         |         |       |       |
| 615 | BPSL0571         | GI3 |      |       |         |         |         |         |         |       |        |        |         |         |         |         |         |         |         |         |         |       |       |
| 616 | BPSL0572         | GI3 |      |       |         |         |         |         |         |       |        |        |         |         |         |         |         |         |         |         |         |       |       |
| 617 | BPSL0573         | GI3 |      |       |         |         |         |         |         |       |        |        |         |         |         |         |         |         |         |         |         |       |       |
| 618 | BPSL0574         | GI3 |      |       |         |         |         |         |         |       |        |        |         |         |         |         |         |         |         |         |         |       |       |
| 619 | BPSL0575         | GI3 |      |       |         |         |         |         |         |       |        |        |         |         |         |         |         |         |         |         |         |       |       |
| 620 | BPSL0576         | GI3 |      |       |         |         |         |         |         |       |        |        |         |         |         |         |         |         |         |         |         |       |       |
| 621 | BPSL0577         | GI3 |      |       |         |         |         |         |         |       |        |        |         |         |         |         |         |         |         |         |         |       |       |
| 622 | BPSL0578         | GI3 |      |       |         |         |         |         |         |       |        |        |         |         |         |         |         |         |         |         |         |       |       |
| 623 | BPSL0579         | GI3 |      |       |         |         |         |         |         |       |        |        |         |         |         |         |         |         |         |         |         |       |       |
| 624 | BPSL0580         | GI3 |      |       |         |         |         |         |         |       |        |        |         |         |         |         |         |         |         |         |         |       |       |
| 625 | BPSL0581         | GI3 |      |       |         |         |         |         |         |       |        |        |         |         |         |         |         |         |         |         |         |       |       |
| 626 | BPSL0582         | GI3 |      |       |         |         |         |         |         |       |        |        |         |         |         |         |         |         |         |         |         |       |       |
| 627 | BPSL0583         | GI3 |      |       |         |         |         |         |         |       |        |        |         |         |         |         |         |         |         |         |         |       |       |
| 628 | BPSL0584         | GI3 |      |       |         |         |         |         |         |       |        |        |         |         |         |         |         |         |         |         |         |       |       |
| 629 | BPSL0585         | GI3 |      |       |         |         |         |         |         |       |        |        |         |         |         |         |         |         |         |         |         |       |       |
| 630 | BPSL0586         | GI3 |      |       |         |         |         |         |         |       |        |        |         |         |         |         |         |         |         |         |         |       |       |
| 631 | BPSL0586a        | GI3 |      |       |         |         |         |         |         |       |        |        |         |         |         |         |         |         |         |         |         |       |       |
| 632 | BPSL0587         | GI3 |      |       |         |         |         |         |         |       |        |        |         |         |         |         |         |         |         |         |         |       |       |
| 633 | BPSL0588         | GI3 |      |       |         |         |         |         |         |       |        |        |         |         |         |         |         |         |         |         |         |       |       |
| 634 | Chr1_30_IS407A_A |     | 6007 | 7242  | 3419381 | 3420616 | 3439108 | 3440343 | 5679    | 6914  | 163047 | 164282 | 2261519 | 2262754 | 2443334 | 2444569 | 3166175 | 3167410 | 2832213 | 2833448 | 34218   | 35453 |       |
| 635 | BPSL0589         | GI3 | 14   | 7554  | 7243    | 3420928 | 3420617 | 3440655 | 3440344 | 7226  | 6915   | 164594 | 164283  | 2261207 | 2261518 | 2444881 | 2444570 | 3167722 | 3167411 | 2833760 | 2833449 | 35765 | 35454 |
| 636 | BPSL0590         |     | 14   | 13364 | 8292    | 3426738 | 3421666 | 3446465 | 3441393 | 13036 | 7964   | 170398 | 165332  | 2255403 | 2260469 | 2450685 | 2445619 | 3173526 | 3168460 | 2839564 | 2834498 | 41569 | 36503 |
| 637 | Chr1_31_IS407A_C |     | 14   |       |         |         |         |         |         |       |        |        |         | 2252754 | 2253989 |         |         |         |         |         |         |       |       |
| 638 | BPSL0591         |     | 14   | 17169 | 13888   | 3430813 | 3430337 | 3450270 | 3446989 | 16841 | 13560  | 174203 | 170922  | 2250358 | 2252769 | 2454490 | 2451209 | 3177331 | 3174050 | 2843369 | 2840088 | 45374 | 42093 |
| 639 | BPSL0592         |     | 14   | 18737 | 18357   | 3432381 | 3432001 | 3451838 | 3451458 | 18409 | 18029  | 175771 | 175391  | 2248790 | 2249170 | 2456058 | 2455678 | 3178899 | 3178519 | 2844937 | 2844557 | 46942 | 46562 |
| 640 | BPSL0593         |     | 14   | 19192 | 18758   | 3432836 | 3432402 | 3452293 | 3451859 | 18864 | 18430  | 176226 | 175792  | 2248335 | 2248769 | 2456513 | 2456079 | 3179354 | 3178920 | 2845392 | 2844958 | 47397 | 46963 |
| 641 | BPSL0594         |     | 14   | 19763 | 19422   | 3433407 | 3433066 | 3452864 | 3452523 | 19435 | 19094  | 176797 | 176456  | 2247764 | 2248105 | 2457084 | 2456743 | 3179925 | 3179584 | 2845963 | 2845622 | 47968 | 47627 |
| 642 | BPSL0595         |     | 14   | 20641 | 20279   | 3434285 | 3433923 | 3453742 | 3453380 | 20313 | 19951  | 177675 | 177313  | 2246886 | 2247248 | 2457962 | 2457600 | 3180803 | 3180441 | 2846841 | 2846479 | 48846 | 48484 |
| 643 | BPSL0596         |     | 14   | 20889 | 21893   | 3434533 | 3435537 | 3453990 | 3454994 | 20561 | 21565  | 177923 | 178927  | 2246638 | 2245634 | 2458210 | 2459214 | 3181051 | 3182055 | 2847089 | 2848093 | 49094 | 50098 |
| 644 | BPSL0597         |     | 14   | 21907 | 25983   | 3435551 | 3439627 | 3455008 | 3459084 | 21579 | 25655  | 178941 | 183017  | 2245620 | 2241544 | 2459228 | 2463304 | 3182069 | 3186145 | 2848107 | 2852183 | 50112 | 54188 |
| 645 | BPSL0598         |     | 14   | 25983 | 26342   | 3439627 | 3439986 | 3459084 | 3459443 | 25655 | 26014  | 183017 | 183376  | 2241544 | 2241185 | 2463304 | 2463663 | 3186145 | 3186504 | 2852183 | 2852542 | 54188 | 54547 |
| 646 | BPSL0599         |     | 14   | 26347 | 26706   | 3439991 | 3440350 | 3459448 | 3459807 | 26019 | 26378  | 183381 | 183740  | 2241180 | 2240821 | 2463668 | 2464027 | 3186509 | 3186868 | 2852547 | 2852906 | 54552 | 54911 |
| 647 | BPSL0600         |     | 14   | 26801 | 29089   | 3440445 | 3442733 | 3459902 | 3462190 | 26473 | 28761  | 183835 | 186123  | 2240726 | 2238438 | 2464122 | 2466410 | 3186963 | 3189251 | 2853001 | 2855289 | 55076 | 57364 |
| 648 | BPSL0601         |     | 14   | 29162 | 29935   | 3442806 | 3443579 | 3462263 | 3463036 | 28834 | 29607  | 186196 | 186969  | 2238365 | 2237592 | 2466483 | 2467256 | 3189324 | 3190097 | 2855362 | 2856135 | 57437 | 58210 |
| 649 | BPSL0602         |     | 14   | 30421 | 32781   | 3444065 | 3446425 | 3463522 | 3465882 | 30093 | 32453  | 187455 | 189815  | 2237106 | 2234746 | 2467742 | 2470102 | 3190583 | 3192943 | 2856621 | 2858981 | 58696 | 61056 |

|              |    |                   |        |         |         |         |         |         |        |        |        |         |         |         |         |         |         |         |         |         |        |        |
|--------------|----|-------------------|--------|---------|---------|---------|---------|---------|--------|--------|--------|---------|---------|---------|---------|---------|---------|---------|---------|---------|--------|--------|
| 650 BPSL0603 | 14 | 34230             | 32965  | 3447874 | 3446609 | 3467331 | 3466066 | 33902   | 32637  | 191273 | 190008 | 2233297 | 2234562 | 2471551 | 2470286 | 3194392 | 3193127 | 2860430 | 2859165 | 62505   | 61240  |        |
| 651 BPSL0604 | 14 | 35503             | 34310  | 3449147 | 3447954 | 3468604 | 3467411 | 35175   | 33982  | 192546 | 191353 | 2232024 | 2233217 | 2472824 | 2471631 | 3195665 | 3194472 | 2861703 | 2860510 | 63778   | 62585  |        |
| 652 BPSL0605 | 14 | 37130             | 35541  | 3450774 | 3449185 | 3470231 | 3468642 | 36802   | 35213  | 194173 | 192584 | 2230397 | 2231986 | 2474451 | 2472862 | 3197292 | 3195703 | 2863330 | 2861741 | 65405   | 63816  |        |
| 653 BPSL0606 | 14 | 37777             | 37130  | 3451421 | 3450774 | 3470878 | 3470231 | 37449   | 36802  | 194820 | 194173 | 2229750 | 2230397 | 2475098 | 2474451 | 3197939 | 3197292 | 2863977 | 2863330 | 66052   | 65405  |        |
| 654 BPSL0607 | 14 | 38155             | 39393  | 3451799 | 3453037 | 3471256 | 3472494 | 37827   | 39065  | 195198 | 196436 | 2229372 | 2228134 | 2475476 | 2476714 | 3198317 | 3199555 | 2864355 | 2865593 | 66430   | 67668  |        |
| 655 BPSL0608 | 14 | 39424             | 40155  | 3453068 | 3453799 | 3472525 | 3473256 | 39096   | 39827  | 196467 | 197198 | 2228103 | 2227366 | 2476745 | 2477482 | 3199586 | 3200323 | 2865624 | 2866361 | 67699   | 68436  |        |
| 656 BPSL0609 | 14 | 40903             | 42288  | 3454547 | 3455932 | 3474004 | 3475389 | 40575   | 41960  | 197946 | 199331 | 2226618 | 2225233 | 2478230 | 2479615 | 3201071 | 3202456 | 2867109 | 2868494 | 69184   | 70569  |        |
| 657 BPSL0610 | 14 | 44322             | 42349  | 3457966 | 3455993 | 3478083 | 3476377 | 43994   | 42021  | 201365 | 199392 | 2223199 | 2225172 | 2481649 | 2479676 | 3204490 | 3202517 | 2870528 | 2868555 | 72603   | 70630  |        |
| 658 BPSL0611 | 14 | 46838             | 44322  | 3460482 | 3457966 | 3480599 | 3478083 | 46510   | 43994  | 203881 | 201365 | 2220683 | 2223199 | 2484165 | 2481649 | 3207006 | 3204490 | 2873044 | 2870528 | 75119   | 72603  |        |
| 659 BPSL0612 | 14 | 47923             | 46838  | 3461567 | 3460482 | 3481684 | 3480599 | 47595   | 46510  | 204966 | 203881 | 2219598 | 2220683 | 2485250 | 2484165 | 3208091 | 3207006 | 2874129 | 2873044 | 76204   | 75119  |        |
| 660 BPSL0613 | 14 | 48894             | 47923  | 3462538 | 3461567 | 3482655 | 3481684 | 48566   | 47595  | 205937 | 204966 | 2218627 | 2219598 | 2486221 | 2485250 | 3209062 | 3208091 | 2875100 | 2874129 | 77175   | 76204  |        |
| 661 BPSL0614 | 14 | 50114             | 48894  | 3463758 | 3462538 | 3483875 | 3482655 | 49786   | 48566  | 207157 | 205937 | 2217407 | 2218627 | 2487441 | 2486221 | 3210282 | 3209062 | 2876320 | 2875100 | 78395   | 77175  |        |
| 662 BPSL0615 | 14 | 50413             | 50114  | 3464057 | 3463758 | 3484174 | 3483875 | 50085   | 49786  | 207456 | 207157 | 2217108 | 2217407 | 2487740 | 2487441 | 3210581 | 3210282 | 2876619 | 2876320 | 78694   | 78395  |        |
| 663 BPSL0616 | 14 | 51401             | 50610  | 3465054 | 3464254 | 3485162 | 3484371 | 51073   | 50282  | 208444 | 207653 | 2216120 | 2216911 | 2488728 | 2487937 | 3211569 | 3210778 | 2877607 | 2876816 | 79682   | 78891  |        |
| 664 BPSL0617 | 14 | 52268             | 53131  | 3465912 | 3466775 | 3486029 | 3486892 | 51940   | 52803  | 209311 | 210174 | 2215253 | 2214390 | 2489595 | 2490458 | 3212436 | 3213299 | 2878474 | 2879337 | 80549   | 81412  |        |
| 665 BPSL0618 | 14 | 53131             | 54546  | 3466775 | 3468190 | 3486892 | 3488307 | 52803   | 54218  | 210174 | 211589 | 2214390 | 2212975 | 2490458 | 2491873 | 3213299 | 3214714 | 2879337 | 2880752 | 81412   | 82827  |        |
| 666 BPSL0619 | 14 | 54621             | 55907  | 3468265 | 3469551 | 3488382 | 3489668 | 54293   | 55579  | 211664 | 212950 | 2212900 | 2211614 | 2491948 | 2493234 | 3214789 | 3216075 | 2880827 | 2882113 | 82902   | 84188  |        |
| 667 BPSL0620 | 14 | 56193             | 57332  | 3469837 | 3470976 | 3489954 | 3491093 | 55865   | 57004  | 213236 | 214375 | 2211328 | 2210189 | 2493520 | 2494659 | 3216361 | 3217500 | 2882399 | 2883538 | 84474   | 85613  |        |
| 668 BPSL0621 | 14 | 58263             | 57367  | 3471907 | 3471011 | 3492024 | 3491128 | 57935   | 57039  | 215306 | 214410 | 2209258 | 2210154 | 2495590 | 2494694 | 3218431 | 3217535 | 2884469 | 2883573 | 86544   | 85648  |        |
| 669          |    | Chr1_32a_ISBma2_A | 58691  | 60263   | 3472335 | 3473907 | 3492452 | 3494024 | 58363  | 59935  | 215734 | 217306  | 2207258 | 2208830 | 2496018 | 2497590 | 3218859 | 3220433 | 2884897 | 2886468 | 86972  | 88544  |
| 670          |    | Chr1_32b_ISBma2_A | 178751 | 180323  | 51985   | 53557   | 51562   | 53134   | 177854 | 179426 |        |         | 2330494 | 2332086 | 2338546 | 2340123 | 52889   | 54461   | 2763087 | 2764659 | 219786 | 221358 |
| 671 BPSL0622 | 15 | 180633            | 181064 | 53867   | 54298   | 53444   | 53875   | 179736  | 180167 | 217616 | 218047 | 2332396 | 2332827 | 2340433 | 2340864 | 54771   | 55202   | 2762777 | 2762346 | 221668  | 222099 |        |
| 672 BPSL0623 | 15 | 181159            | 182121 | 54393   | 55355   | 53970   | 54932   | 180262  | 181224 | 218142 | 219104 | 2332922 | 2333884 | 2340959 | 2341921 | 55297   | 56259   | 2762251 | 2761289 | 222194  | 223156 |        |
| 673 BPSL0624 | 15 | 183008            | 182097 | 56242   | 55331   | 55819   | 54908   | 182111  | 181200 | 219991 | 219080 | 2334771 | 2333860 | 2342808 | 2341897 | 57146   | 56235   | 2760402 | 2761313 | 224043  | 223132 |        |
| 674 BPSL0625 | 15 | 183115            | 184707 | 56349   | 57941   | 55926   | 57518   | 182218  | 183810 | 220098 | 221690 | 2334878 | 2336470 | 2342915 | 2344507 | 57253   | 58845   | 2760295 | 2758703 | 224150  | 225742 |        |
| 675 BPSL0626 | 15 | 184759            | 185190 | 57993   | 58424   | 57570   | 58001   | 183862  | 184293 | 221742 | 222173 | 2336522 | 2336953 | 2344559 | 2344990 | 58897   | 59328   | 2758651 | 2758220 | 225794  | 226225 |        |
| 676 BPSL0627 | 15 | 185892            | 185314 | 59126   | 58548   | 58703   | 58125   | 184995  | 184417 | 222875 | 222297 | 2337655 | 2337077 | 2345692 | 2345114 | 60030   | 59452   | 2757518 | 2758096 | 226297  | 226349 |        |
| 677 BPSL0628 | 15 | 187307            | 186045 | 60541   | 59279   | 60118   | 58856   | 186410  | 185148 | 224290 | 223028 | 2339070 | 2337808 | 2347107 | 2345845 | 61445   | 60183   | 2756103 | 2757365 | 228342  | 227080 |        |
| 678 BPSL0629 | 15 | 187445            | 188335 | 60679   | 61569   | 60256   | 61146   | 186548  | 187438 | 224428 | 225318 | 2339208 | 2340098 | 2347245 | 2348135 | 61583   | 62473   | 2755965 | 2755075 | 228480  | 229370 |        |
| 679 BPSL0630 | 15 | 188676            | 189764 | 61910   | 62998   | 61487   | 62575   | 187779  | 188867 | 225659 | 226747 | 2340439 | 2341527 | 2348476 | 2349564 | 62814   | 63902   | 2754734 | 2753646 | 229711  | 230799 |        |
| 680 BPSL0631 | 15 | 189894            | 190277 | 63128   | 63511   | 62705   | 63088   | 188997  | 189380 | 226877 | 227260 | 2341657 | 2342040 | 2349694 | 2350077 | 64032   | 64415   | 2753516 | 2753133 | 230929  | 231312 |        |
| 681 BPSL0632 | 15 | 191448            | 190627 | 64682   | 63861   | 64259   | 63438   | 190551  | 189730 | 228431 | 227610 | 2343211 | 2342390 | 2351248 | 2350427 | 65586   | 64765   | 2751962 | 2752783 | 232483  | 231662 |        |
| 682 BPSL0633 | 15 | 192991            | 191471 | 66225   | 64705   | 65802   | 64282   | 192094  | 190574 | 229974 | 228454 | 2344754 | 2343234 | 2352791 | 2351271 | 67129   | 65609   | 2750419 | 2751939 | 234026  | 232506 |        |
| 683 BPSL0634 | 15 | 193447            | 197523 | 66681   | 70757   | 66258   | 70334   | 192550  | 196626 | 230430 | 234506 | 2345210 | 2349286 | 2353247 | 2357323 | 67585   | 71661   | 2749963 | 2745887 | 234482  | 238558 |        |
| 684 BPSL0635 | 15 | 197561            | 198001 | 70795   | 71235   | 70372   | 70812   | 196664  | 197104 | 234544 | 234984 | 2349324 | 2349764 | 2357361 | 2357801 | 71699   | 72139   | 2745849 | 2745409 | 238596  | 239036 |        |
| 685 BPSL0636 | 15 | 198001            | 198411 | 71235   | 71645   | 70812   | 71222   | 197104  | 197514 | 234984 | 235394 | 2349764 | 2350174 | 2357801 | 2358211 | 72139   | 72549   | 2745409 | 2744999 | 239036  | 239446 |        |
| 686 BPSL0637 | 15 | 198462            | 199190 | 71696   | 72424   | 71273   | 72001   | 197565  | 198293 | 235445 | 236173 | 2350225 | 2350953 | 2358262 | 2358990 | 72600   | 73328   | 2744948 | 2744220 | 239497  | 240225 |        |
| 687 BPSL0638 | 15 | 199283            | 200251 | 72517   | 73485   | 72094   | 73062   | 198386  | 199354 | 236266 | 237234 | 2351046 | 2352014 | 2359083 | 2360051 | 73421   | 74389   | 2744127 | 2743159 | 240318  | 241286 |        |
| 688 BPSL0639 | 15 | 200335            | 201006 | 73569   | 74240   | 73146   | 73817   | 199438  | 200109 | 237318 | 237989 | 2352098 | 2352769 | 2360135 | 2360806 | 74473   | 75144   | 2743075 | 2742404 | 241370  | 242041 |        |
| 689 BPSL0640 | 15 | 201022            | 202596 | 74256   | 75830   | 73833   | 75407   | 200125  | 201699 | 238005 | 239579 | 2352785 | 2354359 | 2360822 | 2362396 | 75160   | 76734   | 2742388 | 2740814 | 242057  | 243631 |        |
| 690 BPSL0641 | 15 | 202923            | 203552 | 76157   | 76786   | 75734   | 76363   | 202026  | 202655 | 239906 | 240535 | 2354686 | 2355315 | 2362723 | 2363352 | 77061   | 77690   | 2740487 | 2739858 | 243958  | 244587 |        |
| 691 BPSL0642 | 15 | 203671            | 204009 | 76905   | 77243   | 76482   | 76820   | 202774  | 203112 | 240654 | 240992 | 2355434 | 2355772 | 2363471 | 2363809 | 77809   | 78147   | 2739739 | 2739401 | 244706  | 245044 |        |
| 692 BPSL0643 | 15 | 204083            | 204727 | 77317   | 77961   | 76894   | 77538   | 203186  | 203830 | 241066 | 241710 | 2355846 | 2356490 | 2363883 | 2364527 | 78221   | 78865   | 2739327 | 2738683 | 245118  | 245762 |        |
| 693 BPSL0644 | 15 | 204787            | 206586 | 78021   | 79820   | 77598   | 79397   | 203890  | 205689 | 241770 | 243569 | 2356550 | 2358349 | 2364587 | 2366386 | 78925   | 80724   | 2738623 | 2736824 | 245822  | 247621 |        |
| 694 BPSL0645 | 15 | 206798            | 207271 | 80032   | 80505   | 79609   | 80082   | 205901  | 206374 | 243781 | 244254 | 2358561 | 2359034 | 2366598 | 2367071 | 80936   | 81409   | 2736612 | 2736139 | 247833  | 248306 |        |
| 695 BPSL0646 | 15 | 207271            | 208542 | 80505   | 81776   | 80082   | 81353   | 206374  | 207645 | 244254 | 245525 | 2359034 | 2360305 | 2367071 | 2368342 | 81409   | 82680   | 2736139 | 2734868 | 248306  | 249577 |        |
| 696 BPSL0647 | 15 | 208735            | 209331 | 81969   | 82565   | 81546   | 82142   | 207838  | 208434 | 245718 | 246314 | 2360498 | 2361094 | 2368535 | 2369131 | 82873   | 83469   | 2734675 | 2734079 | 249770  | 250366 |        |
| 697 BPSL0648 | 15 | 209392            | 211176 | 82626   | 84410   | 82203   | 83987   | 208495  | 210279 | 246375 | 248159 | 2361155 | 2362939 | 2369192 | 2370976 | 83530   | 85314   | 2734018 | 2732234 | 250427  | 252211 |        |
| 698 BPSL0649 | 15 | 211337            | 213769 | 84571   | 87003   | 84148   | 86580   | 210454  | 212886 | 248320 | 250752 | 2363100 | 2365532 | 2371137 | 2373569 | 85573   | 88005   | 2732073 | 2729641 | 252546  | 254978 |        |
| 699 BPSL0650 | 15 | 213952            | 215148 | 87186   | 88382   | 86763   | 87959   | 213069  | 214265 | 250935 | 252    |         |         |         |         |         |         |         |         |         |        |        |

|              |    |        |        |        |        |        |        |        |        |        |        |         |         |         |         |        |        |         |         |        |        |
|--------------|----|--------|--------|--------|--------|--------|--------|--------|--------|--------|--------|---------|---------|---------|---------|--------|--------|---------|---------|--------|--------|
| 701 BPSL0652 | 15 | 216948 | 216127 | 90182  | 89361  | 89759  | 88938  | 216065 | 215244 | 253931 | 253110 | 2368711 | 2367890 | 2376748 | 2375927 | 91184  | 90363  | 2726462 | 2727283 | 258157 | 257336 |
| 702 BPSL0653 | 15 | 217082 | 217558 | 90316  | 90792  | 89893  | 90369  | 216199 | 216675 | 254065 | 254541 | 2368845 | 2369321 | 2376882 | 2377358 | 91318  | 91794  | 2726328 | 2725852 | 258291 | 258767 |
| 703 BPSL0654 | 15 | 218019 | 217609 | 91253  | 90843  | 90830  | 90420  | 217136 | 216726 | 255002 | 254592 | 2369782 | 2369372 | 2377819 | 2377409 | 92255  | 91845  | 2725391 | 2725801 | 259228 | 258818 |
| 704 BPSL0655 | 15 | 218326 | 220194 | 91560  | 93428  | 91137  | 93005  | 217443 | 219311 | 255309 | 257177 | 2370089 | 2371957 | 2378126 | 2379994 | 92562  | 94430  | 2725084 | 2723216 | 259535 | 261403 |
| 705 BPSL0656 | 15 | 221409 | 220693 | 94643  | 93927  | 94220  | 93504  | 220526 | 219810 | 258392 | 257676 | 2373172 | 2372456 | 2381209 | 2380493 | 95645  | 94929  | 2722001 | 2722717 | 262618 | 261902 |
| 706 BPSL0657 | 15 | 222447 | 221416 | 95681  | 94650  | 95258  | 94227  | 221564 | 220533 | 259430 | 258399 | 2374210 | 2373179 | 2382247 | 2381216 | 96683  | 95652  | 2720963 | 2721994 | 263656 | 262625 |
| 707 BPSL0658 | 15 | 222673 | 225033 | 95907  | 98267  | 95484  | 97844  | 221790 | 224150 | 259656 | 262016 | 2374436 | 2376796 | 2382473 | 2384833 | 96909  | 99269  | 2720737 | 2718377 | 263882 | 266242 |
| 708 BPSL0659 | 15 | 225097 | 226446 | 98331  | 99680  | 97908  | 99257  | 224214 | 225563 | 262080 | 263429 | 2376860 | 2378209 | 2384897 | 2386246 | 99333  | 100682 | 2718313 | 2716964 | 266306 | 267655 |
| 709 BPSL0660 | 15 | 226471 | 227502 | 99705  | 100736 | 99282  | 100313 | 225588 | 226619 | 263454 | 264485 | 2378234 | 2379265 | 2386271 | 2387302 | 100707 | 101738 | 2716939 | 2715908 | 267680 | 268711 |
| 710 BPSL0661 | 15 | 227537 | 228361 | 100771 | 101595 | 100348 | 101172 | 226654 | 227478 | 264520 | 265344 | 2379300 | 2380124 | 2387337 | 2388161 | 101773 | 102597 | 2715873 | 2715049 | 268746 | 269570 |
| 711 BPSL0662 | 15 | 229360 | 228617 | 102781 | 102584 | 102358 | 102161 | 228664 | 228467 | 266535 | 266338 | 2381355 | 2381158 | 2389367 | 2389170 | 103813 | 103616 | 2713783 | 2713980 | 270836 | 270639 |
| 712 BPSL0663 | 15 | 229925 | 230311 | 103159 | 103545 | 102736 | 103122 | 229042 | 229428 | 266913 | 267299 | 2381733 | 2382119 | 2389745 | 2390131 | 104191 | 104577 | 2713405 | 2713019 | 271214 | 271600 |
| 713 BPSL0664 | 15 | 231372 | 230530 | 104606 | 103764 | 104183 | 103341 | 230489 | 229647 | 268360 | 267518 | 2383180 | 2382338 | 2391192 | 2390350 | 105638 | 104796 | 2711958 | 2712800 | 272661 | 271819 |
| 714 BPSL0665 | 15 | 232232 | 231456 | 105466 | 104690 | 105043 | 104267 | 231349 | 230573 | 269220 | 268444 | 2384040 | 2383264 | 2392052 | 2391276 | 106498 | 105722 | 2711098 | 2711874 | 273521 | 272745 |
| 715 BPSL0666 | 15 | 232838 | 232278 | 106072 | 105512 | 105649 | 105089 | 231955 | 231395 | 269826 | 269266 | 2384646 | 2384086 | 2392658 | 2392098 | 107104 | 106544 | 2710492 | 2711052 | 274127 | 273567 |
| 716 BPSL0667 | 15 | 234955 | 232859 | 108189 | 106093 | 107766 | 105670 | 234072 | 231976 | 271943 | 269847 | 2386763 | 2384667 | 2394775 | 2392679 | 109221 | 107125 | 2708375 | 2710471 | 276244 | 274148 |
| 717 BPSL0668 | 15 | 235979 | 234975 | 109213 | 108209 | 108790 | 107786 | 235096 | 234092 | 272967 | 271963 | 2387787 | 2386783 | 2395799 | 2394795 | 110245 | 109241 | 2707351 | 2708355 | 277268 | 276264 |
| 718 BPSL0669 | 15 | 237941 | 236238 | 111817 | 111101 | 110752 | 109049 | 237058 | 235355 | 274929 | 273226 | 2389749 | 2388046 | 2397761 | 2396058 | 112270 | 111533 | 2705389 | 2707092 | 279230 | 277527 |
| 719 BPSL0670 | 15 | 238871 | 237987 | 112747 | 111863 | 111682 | 110798 | 237988 | 237104 | 275859 | 274975 | 2390679 | 2389795 | 2398691 | 2397807 | 113200 | 112316 | 2704459 | 2705343 | 280160 | 279276 |
| 720 BPSL0671 | 15 | 240005 | 239376 | 113881 | 113252 | 112816 | 112187 | 239122 | 238493 | 276993 | 276364 | 2391813 | 2391184 | 2399825 | 2399196 | 114334 | 113705 | 2703325 | 2703954 | 281294 | 280665 |
| 721 BPSL0672 | 15 | 240841 | 240029 | 114717 | 113905 | 113652 | 112840 | 239958 | 239146 | 277829 | 277017 | 2392649 | 2391837 | 2400661 | 2399849 | 115170 | 114358 | 2702489 | 2703301 | 282130 | 281318 |
| 722 BPSL0673 | 15 | 242577 | 241522 | 116453 | 115398 | 115388 | 114333 | 241694 | 240639 | 279629 | 278574 | 2394409 | 2393354 | 2402405 | 2401350 | 116890 | 115835 | 2700721 | 2701776 | 283570 | 282515 |
| 723 BPSL0674 | 15 | 243974 | 242604 | 117850 | 116480 | 116785 | 115415 | 243091 | 241721 | 281026 | 279656 | 2395806 | 2394436 | 2403802 | 2402432 | 118287 | 116917 | 2699324 | 2700694 | 284700 | 283597 |
| 724 BPSL0675 | 15 | 245392 | 244463 | 119268 | 118339 | 118203 | 117274 | 244509 | 243580 | 282444 | 281515 | 2397224 | 2396295 | 2405220 | 2404291 | 119705 | 118776 | 2697906 | 2698835 | 285992 | 285063 |
| 725 BPSL0676 | 15 | 245538 | 246707 | 119414 | 120583 | 118349 | 119518 | 244655 | 245824 | 282590 | 283759 | 2397370 | 2398539 | 2405366 | 2406535 | 119851 | 121020 | 2697760 | 2696591 | 286138 | 287307 |
| 726 BPSL0677 | 15 | 246844 | 247509 | 120720 | 121385 | 119655 | 120320 | 245961 | 246626 | 283896 | 284561 | 2398676 | 2399341 | 2406672 | 2407337 | 121157 | 121822 | 2696454 | 2695789 | 287444 | 288109 |
| 727 BPSL0678 | 15 | 247931 | 248650 | 121807 | 122526 | 120742 | 121461 | 247048 | 247767 | 284983 | 285702 | 2399763 | 2400482 | 2407759 | 2408478 | 122244 | 122963 | 2695367 | 2694648 | 288531 | 289250 |
| 728 BPSL0679 | 15 | 249407 | 248724 | 123283 | 122600 | 122218 | 121535 | 248524 | 247841 | 286459 | 285776 | 2401239 | 2400556 | 2409235 | 2408552 | 123720 | 123037 | 2693891 | 2694574 | 290007 | 289324 |
| 729 BPSL0680 | 15 | 250391 | 249540 | 124267 | 123416 | 123202 | 122351 | 249508 | 248657 | 287443 | 286592 | 2402223 | 2401372 | 2410219 | 2409368 | 124704 | 123853 | 2692907 | 2693758 | 290991 | 290140 |
| 730 BPSL0681 | 15 | 251701 | 251279 | 125577 | 125155 | 124512 | 124090 | 250818 | 250396 | 288753 | 288331 | 2403533 | 2403111 | 2411529 | 2411107 | 126014 | 125592 | 2691597 | 2692019 | 292301 | 291879 |
| 731 BPSL0682 | 15 | 253271 | 251742 | 127147 | 125618 | 126082 | 124553 | 252388 | 250859 | 290323 | 288794 | 2405103 | 2403574 | 2413099 | 2411570 | 127584 | 126055 | 2690027 | 2691556 | 293958 | 292429 |
| 732 BPSL0683 | 15 | 254670 | 253318 | 128546 | 127194 | 127481 | 126129 | 253787 | 252435 | 291722 | 290370 | 2406502 | 2405150 | 2414498 | 2413146 | 128983 | 127631 | 2688628 | 2689980 | 295357 | 294005 |
| 733 BPSL0684 | 15 | 256016 | 254712 | 129892 | 128588 | 128827 | 127523 | 255133 | 253829 | 293068 | 291764 | 2407848 | 2406544 | 2415844 | 2414540 | 130329 | 129025 | 2687282 | 2688586 | 296703 | 295399 |
| 734 BPSL0685 | 15 | 256460 | 256041 | 130336 | 129917 | 129271 | 128852 | 255577 | 255158 | 293512 | 293093 | 2408292 | 2407873 | 2416288 | 2415869 | 130773 | 130354 | 2686838 | 2687257 | 297147 | 296728 |
| 735 BPSL0686 | 15 | 258093 | 257380 | 131969 | 131256 | 130904 | 130191 | 257210 | 256497 | 295145 | 294432 | 2409925 | 2409212 | 2417921 | 2417208 | 132406 | 131693 | 2685205 | 2685918 | 298780 | 298067 |
| 736 BPSL0687 | 15 | 259708 | 258209 | 133584 | 132085 | 132519 | 131020 | 258825 | 257326 | 296760 | 295261 | 2411540 | 2410041 | 2419536 | 2418037 | 134021 | 132522 | 2683590 | 2685089 | 300395 | 298896 |
| 737 BPSL0688 | 15 | 261346 | 259817 | 135222 | 133693 | 134157 | 132628 | 260463 | 258934 | 298398 | 296869 | 2413178 | 2411649 | 2421174 | 2419645 | 135659 | 134130 | 2681952 | 2683481 | 302033 | 300504 |
| 738 BPSL0689 | 15 | 261514 | 261882 | 135390 | 135758 | 134325 | 134693 | 260631 | 260999 | 298566 | 298934 | 2413346 | 2413714 | 2421342 | 2421710 | 135827 | 136195 | 2681784 | 2681416 | 302201 | 302569 |
| 739 BPSL0690 | 15 | 262161 | 261955 | 136037 | 135831 | 134972 | 134766 | 261278 | 261072 | 299213 | 299007 | 2413993 | 2413787 | 2421989 | 2421783 | 136474 | 136268 | 2681137 | 2681343 | 302848 | 302642 |
| 740 BPSL0691 | 15 | 263306 | 262473 | 137182 | 136349 | 136117 | 135284 | 262423 | 261590 | 300358 | 299525 | 2415138 | 2414305 | 2423134 | 2422301 | 137619 | 136786 | 2679992 | 2680825 | 303993 | 303160 |
| 741 BPSL0692 | 15 | 263477 | 265147 | 137353 | 139023 | 136288 | 137958 | 262594 | 262464 | 300529 | 302199 | 2415309 | 2416979 | 2423305 | 2424975 | 137790 | 139460 | 2679821 | 2678151 | 304164 | 305834 |
| 742 BPSL0693 | 15 | 265453 | 266283 | 139329 | 140159 | 138264 | 139094 | 264570 | 265400 | 302505 | 303335 | 2417285 | 2418115 | 2425281 | 2426111 | 139766 | 140596 | 2677845 | 2677015 | 306140 | 306970 |
| 743 BPSL0694 | 15 | 266356 | 266853 | 140232 | 140729 | 139167 | 139664 | 265473 | 265970 | 303408 | 303905 | 2418188 | 2418685 | 2426184 | 2426681 | 140669 | 141166 | 2676942 | 2676445 | 307043 | 307510 |
| 744 BPSL0695 | 15 | 268451 | 266997 | 142327 | 140873 | 141262 | 139808 | 267568 | 266114 | 305503 | 304049 | 2420292 | 2418829 | 2428279 | 2426825 | 142764 | 141310 | 2674847 | 2676301 | 308851 | 307616 |
| 745 BPSL0696 | 15 | 269877 | 268582 | 143845 | 142550 | 143377 | 142082 | 269025 | 267730 | 307002 | 305707 | 2421718 | 2420423 | 2429705 | 2428410 | 144296 | 143001 | 2673421 | 2674716 | 310354 | 309059 |
| 746 BPSL0697 | 15 | 270658 | 269900 | 144626 | 143868 | 144158 | 143400 | 269806 | 269048 | 307783 | 307025 | 2422499 | 2421741 | 2430486 | 2429728 | 145077 | 144319 | 2672840 | 2673398 | 311135 | 310377 |
| 747 BPSL0698 | 15 | 271080 | 272003 | 145048 | 145971 | 144580 | 145503 | 270228 | 270587 | 308205 | 309128 | 2422921 | 2423844 | 2430908 | 2431831 | 145499 | 146422 | 2672218 | 2671295 | 311557 | 312480 |
| 748 BPSL0699 | 15 | 273589 | 272444 | 147557 | 146412 | 147089 | 145944 | 272281 | 271136 | 310724 | 309579 | 2425404 | 2424259 | 2433375 | 2432230 | 148014 | 146869 | 2669755 | 2670900 | 314010 | 312865 |
| 749 BPSL0700 | 15 | 274032 | 274376 | 148000 | 148344 | 147532 | 147876 | 272724 | 273068 | 311167 | 311511 | 2425847 | 2426191 | 2433818 | 2434362 | 148457 | 148801 | 2669312 | 2668968 | 314453 | 314797 |







|                |    |        |        |        |        |        |        |        |        |        |        |         |         |        |        |        |        |        |        |        |        |
|----------------|----|--------|--------|--------|--------|--------|--------|--------|--------|--------|--------|---------|---------|--------|--------|--------|--------|--------|--------|--------|--------|
| 854 BPSL0802   | 17 | 318192 | 319214 | 193008 | 194030 | 193852 | 194874 | 316806 | 317828 | 355420 | 356442 | 2470651 | 2471673 | 41296  | 42318  | 193417 | 194439 | 606250 | 607272 | 331221 | 332243 |
| 855 BPSL0803   | 17 | 320610 | 319474 | 195426 | 194290 | 196270 | 195134 | 319224 | 318088 | 357850 | 356714 | 2473083 | 2471947 | 43748  | 42612  | 195861 | 194725 | 608662 | 607526 | 333639 | 332503 |
| 856 BPSL0804   | 17 | 321632 | 320718 | 196448 | 195534 | 197292 | 196378 | 320246 | 319332 | 358872 | 357958 | 2474105 | 2473191 | 44770  | 43856  | 196883 | 195969 | 609684 | 608770 | 334661 | 333747 |
| 857 BPSL0805   | 17 | 323471 | 322023 | 198287 | 196839 | 199131 | 197683 | 322085 | 320637 | 360735 | 359287 | 2475968 | 2474520 | 46573  | 45125  | 198782 | 197334 | 611475 | 610027 | 336464 | 335016 |
| 858 BPSL0806   | 17 | 323739 | 324398 | 198555 | 199214 | 199399 | 200058 | 322353 | 323012 | 361003 | 361662 | 2476236 | 2476895 | 46841  | 47500  | 199050 | 199709 | 611743 | 612402 | 336732 | 337391 |
| 859 BPSL0807   | 17 | 324405 | 325718 | 199221 | 200534 | 200065 | 201378 | 323019 | 324332 | 361669 | 362982 | 2476902 | 2478215 | 47507  | 48820  | 199716 | 201029 | 612409 | 613722 | 337398 | 338711 |
| 860 BPSL0808   | 17 | 326252 | 327667 | 201068 | 202483 | 201912 | 203327 | 324866 | 326281 | 363516 | 364931 | 2478749 | 2480164 | 49354  | 50769  | 201563 | 202978 | 614256 | 615671 | 339245 | 340660 |
| 861 BPSL0809   | 17 | 327830 | 328249 | 202646 | 203065 | 203490 | 203909 | 326444 | 326863 | 365094 | 365513 | 2480327 | 2480746 | 50932  | 51351  | 203141 | 203560 | 615834 | 616253 | 340823 | 341242 |
| 862 BPSL0810   | 17 | 328380 | 328742 | 203196 | 203558 | 204040 | 204402 | 326994 | 327356 | 365644 | 366006 | 2480877 | 2481239 | 51482  | 51844  | 203691 | 204053 | 616384 | 616746 | 341373 | 341735 |
| 863 BPSL0811   | 17 | 328773 | 329498 | 203589 | 204314 | 204433 | 205158 | 327387 | 328112 | 366037 | 366762 | 2481270 | 2481995 | 51875  | 52600  | 204084 | 204809 | 616777 | 617502 | 341766 | 342491 |
| 864 BPSL0812   | 17 | 330463 | 329831 | 205279 | 204647 | 206123 | 205491 | 329077 | 328445 | 367727 | 367095 | 2482960 | 2482328 | 53565  | 52933  | 205774 | 205142 | 618467 | 617835 | 343456 | 342824 |
| 865 BPSL0814   | 17 | 330873 | 332132 | 205689 | 206948 | 206533 | 207792 | 329487 | 330746 | 368137 | 368412 | 2483370 | 2484629 | 53975  | 55234  | 206184 | 207443 | 618877 | 620136 | 343866 | 345125 |
| 866 BPSL0815   | 17 | 332151 | 335348 | 206967 | 210164 | 207811 | 211008 | 330765 | 333962 | 369101 | 372298 | 2484648 | 2487845 | 55253  | 58450  | 207462 | 210659 | 620155 | 623352 | 345144 | 348341 |
| 867 BPSL0816   | 17 | 335355 | 336896 | 210171 | 211712 | 211015 | 212556 | 333969 | 335510 | 372305 | 373846 | 2487852 | 2489393 | 58457  | 59998  | 210666 | 212207 | 623359 | 624900 | 348348 | 349889 |
| 868            | 17 | 337256 | 338560 | 212072 | 213376 | 212916 | 214220 | 335870 | 337174 | 374206 | 375510 | 2489753 | 2491057 | 60358  | 61662  | 212567 | 213871 | 625260 | 626564 | 350249 | 351553 |
| 869 BPSL0817_p | 17 | 339665 | 338796 | 214481 | 213612 | 215325 | 214456 | 338279 | 337410 | 376615 | 375746 | 2492051 | 2491293 | 62656  | 61898  | 214865 | 214107 | 627669 | 626800 | 352658 | 351789 |
| 870            | 17 | 339666 | 340901 | 214482 | 215717 | 215326 | 216561 | 338280 | 339515 | 376616 | 377851 | 2492041 | 2493276 | 62646  | 63881  | 214855 | 216090 | 627670 | 628905 | 352659 | 353894 |
| 871 BPSL0817_p | 17 |        |        |        |        |        |        |        |        |        |        | 2493853 | 2493278 | 64458  | 63883  | 216667 | 216092 | 629482 | 628907 | 354471 | 353896 |
| 872 BPSL0818   | 17 | 340902 | 341138 | 215718 | 215954 | 216562 | 216798 | 339516 | 339752 | 377852 | 378088 | 2494354 | 2495310 | 64959  | 65915  | 217168 | 218124 | 629983 | 630939 | 354972 | 355658 |
| 873 BPSL0819   | 17 | 342462 | 341431 | 217278 | 216247 | 218122 | 217091 | 341076 | 340045 | 379412 | 378381 | 2496857 | 2495826 | 67462  | 66431  | 219662 | 218631 | 632468 | 631437 | 357108 | 356077 |
| 874 BPSL0820   | 17 | 342667 | 343770 | 217483 | 218586 | 218327 | 219430 | 341281 | 342384 | 379617 | 380720 | 2497062 | 2498165 | 67667  | 68770  | 219867 | 220970 | 632673 | 633776 | 357313 | 358416 |
| 875 BPSL0821   | 17 | 343787 | 344644 | 218603 | 219460 | 219447 | 220304 | 342401 | 343258 | 380737 | 381594 | 2498182 | 2499039 | 68787  | 69644  | 220987 | 221844 | 633793 | 634650 | 358433 | 359290 |
| 876 BPSL0822   | 17 | 345583 | 344795 | 220399 | 219611 | 221243 | 220455 | 344197 | 343409 | 382533 | 381745 | 2499978 | 2499190 | 70583  | 69795  | 222783 | 221995 | 635589 | 634801 | 360229 | 359441 |
| 877 BPSL0823   | 17 | 346448 | 345579 | 221264 | 220395 | 222108 | 221239 | 345062 | 344193 | 383398 | 382529 | 2500843 | 2499974 | 71448  | 70579  | 223648 | 222779 | 636454 | 635585 | 361094 | 360225 |
| 878 BPSL0824   | 17 | 347346 | 346474 | 222162 | 221290 | 223006 | 222134 | 345960 | 345088 | 384290 | 383424 | 2501741 | 2500869 | 72346  | 71474  | 224546 | 223674 | 637352 | 636480 | 361992 | 361120 |
| 879 BPSL0825   | 17 | 348086 | 347625 | 222902 | 222441 | 223746 | 223285 | 346700 | 346239 | 385009 | 384548 | 2502481 | 2502020 | 73086  | 72625  | 225286 | 224825 | 638079 | 637618 | 362719 | 362258 |
| 880 BPSL0826   | 17 | 348380 | 349153 | 223219 | 223969 | 224040 | 224813 | 346994 | 347767 | 385303 | 386076 | 2502775 | 2503548 | 73380  | 74153  | 225580 | 226353 | 638373 | 639146 | 363013 | 363786 |
| 881 BPSL0827   | 17 | 349161 | 350114 | 223977 | 224930 | 224821 | 225774 | 347775 | 348728 | 386084 | 387037 | 2503556 | 2504509 | 74161  | 75114  | 226361 | 227314 | 639154 | 640107 | 363794 | 364747 |
| 882 BPSL0828   | 17 | 350105 | 351442 | 224921 | 226258 | 225765 | 227102 | 348719 | 350056 | 387028 | 388365 | 2504500 | 2505837 | 75105  | 76442  | 227305 | 228642 | 640098 | 641435 | 364738 | 366096 |
| 883 BPSL0829   | 17 | 351645 | 352970 | 226461 | 227786 | 227305 | 228630 | 350259 | 351584 | 388568 | 389893 | 2506400 | 2507365 | 76645  | 77970  | 228845 | 230170 | 641638 | 642963 | 366299 | 367624 |
| 884 BPSL0830   | 17 | 353081 | 354022 | 228312 | 229253 | 229317 | 230258 | 351709 | 352650 | 390053 | 390994 | 2507476 | 2508417 | 78081  | 79022  | 230348 | 231289 | 643074 | 644015 | 367995 | 368936 |
| 885 BPSL0831   | 17 | 354022 | 354885 | 229253 | 230116 | 230258 | 231121 | 352650 | 353513 | 390994 | 391857 | 2508417 | 2509280 | 79022  | 79885  | 231289 | 232152 | 644015 | 644878 | 368936 | 369799 |
| 886 BPSL0832   | 17 | 354885 | 355580 | 230116 | 230811 | 231121 | 231816 | 353513 | 354208 | 391857 | 392552 | 2509280 | 2509975 | 79885  | 80580  | 232152 | 232847 | 644878 | 645573 | 369799 | 370494 |
| 887 BPSL0833   | 17 | 355590 | 356753 | 230821 | 231984 | 231826 | 232989 | 354218 | 355381 | 392562 | 393725 | 2509985 | 2511148 | 80590  | 81753  | 232857 | 234020 | 645583 | 646746 | 370504 | 371667 |
| 888 BPSL0834   | 17 | 358262 | 356964 | 233493 | 232195 | 234498 | 233200 | 356890 | 355592 | 395234 | 393936 | 2512657 | 2511359 | 83262  | 81964  | 235529 | 234231 | 648255 | 646957 | 373176 | 371878 |
| 889 BPSL0835   | 17 | 359517 | 358636 | 234748 | 233867 | 235753 | 234872 | 358145 | 357264 | 396489 | 395608 | 2513912 | 2513031 | 84517  | 83636  | 236784 | 235903 | 649510 | 648629 | 374460 | 373609 |
| 890 BPSL0836   | 17 | 359655 | 360848 | 234886 | 236079 | 235891 | 237084 | 358283 | 359476 | 396627 | 397820 | 2514050 | 2515243 | 84655  | 85848  | 236922 | 238115 | 649648 | 650841 | 374598 | 375791 |
| 891 BPSL0837   | 17 | 360848 | 362056 | 236079 | 237287 | 237084 | 237737 | 359476 | 360684 | 397820 | 399028 | 2515243 | 2516451 | 85848  | 87056  | 238115 | 239323 | 650841 | 652049 | 375791 | 376999 |
| 892 BPSL0838   | 17 | 363168 | 362224 | 238399 | 237455 | 240038 | 239094 | 361796 | 360852 | 400140 | 399196 | 2517563 | 2516619 | 88168  | 87224  | 240435 | 239491 | 653161 | 652217 | 378111 | 377167 |
| 893 BPSL0839   | 17 | 364727 | 363258 | 239958 | 238489 | 241597 | 240128 | 363161 | 361962 | 401699 | 400230 | 2519122 | 2517653 | 89727  | 88258  | 241994 | 240525 | 654720 | 653251 | 379571 | 378201 |
| 894 BPSL0840   | 17 | 366280 | 364841 | 241511 | 240072 | 243150 | 241711 | 364714 | 363275 |        |        | 2520675 | 2519236 | 91280  | 89841  | 243547 | 242108 | 656273 | 654834 | 381039 | 379675 |
| 895 BPSL0841   | 17 | 367336 | 366455 | 242567 | 241686 | 244206 | 243325 | 365770 | 364889 | 404304 | 403423 | 2521731 | 2520850 | 92336  | 91455  | 244603 | 243722 | 657329 | 656448 | 382095 | 381214 |
| 896 BPSL0842   | 17 | 367449 | 369065 | 242680 | 243360 | 244319 | 245935 | 365883 | 367499 | 404417 | 406033 | 2521844 | 2523460 | 92449  | 94065  | 244716 | 246332 | 657442 | 659058 | 382208 | 383824 |
| 897 BPSL0843   | 17 | 369190 | 370638 | 244734 | 246182 | 246060 | 247508 | 367624 | 369072 | 406158 | 407606 | 2523578 | 2525026 | 94183  | 95631  | 246450 | 247898 | 659183 | 660631 | 383949 | 385397 |
| 898 BPSL0844   | 17 | 370670 | 371599 | 246214 | 247143 | 247540 | 248469 | 369104 | 370033 | 407638 | 408567 | 2525058 | 2525987 | 95663  | 96592  | 247930 | 248859 | 660663 | 661592 | 385429 | 386358 |
| 899 BPSL0844a  | 17 | 372112 | 372342 | 247656 | 247886 | 248982 | 249212 | 370546 | 370776 | 409080 | 409310 | 2526500 | 2526730 | 97105  | 97335  | 249372 | 249602 | 662105 | 662335 | 386871 | 387101 |
| 900 BPSL0845   | 17 | 372342 | 373721 | 247886 | 249265 | 249212 | 250591 | 370776 | 372155 | 409310 | 410701 | 2526730 | 2528121 | 97335  | 98726  | 249602 | 250993 | 662335 | 663726 | 387101 | 388492 |
| 901 BPSL0846   | 17 | 374670 | 373753 | 250214 | 249297 | 251540 | 250623 | 373104 | 372187 | 411650 | 410733 | 2529070 | 2528153 | 99675  | 98758  | 251942 | 251025 | 664675 | 663758 | 389441 | 388524 |
| 902 BPSL0847   | 17 | 376019 | 374772 | 251563 | 250316 | 252889 | 251642 | 374453 | 373206 | 412999 | 411752 | 2530419 | 2529172 | 101024 | 99777  | 253291 | 252044 | 666024 | 664777 | 390790 | 389543 |
| 903 BPSL0848   | 17 | 376702 | 376064 | 252246 | 251608 | 253572 | 252934 | 375136 | 374498 | 413682 | 413042 | 2531102 | 2530464 | 101707 | 101069 | 253974 | 253336 | 666707 | 666069 | 391473 | 390835 |
| 904 BPSL0849   | 17 | 376832 | 377332 | 252376 | 252876 | 253702 | 254202 |        |        |        |        |         |         |        |        |        |        |        |        |        |        |



|     |                   |    |         |         |         |         |         |         |         |         |         |         |         |         |         |         |         |         |        |        |           |         |
|-----|-------------------|----|---------|---------|---------|---------|---------|---------|---------|---------|---------|---------|---------|---------|---------|---------|---------|---------|--------|--------|-----------|---------|
| 905 | BPSL0850          | 17 | 377837  | 377325  | 253381  | 252869  | 254707  | 254195  | 376271  | 375759  | 414817  | 414305  | 2532237 | 2531725 | 102842  | 102330  | 255109  | 254597  | 667842 | 667330 | 392608    | 392096  |
| 906 | BPSL0851          | 17 | 378212  | 378766  | 254087  | 254641  | 255082  | 255636  | 376525  | 377079  | 415192  | 415746  | 2532612 | 2533166 | 103217  | 103771  | 255484  | 256038  | 668217 | 668771 | 392983    | 393537  |
| 907 | BPSL0852          | 17 | 380298  | 379129  | 256173  | 255004  | 257168  | 255999  | 378611  | 377442  | 417278  | 416109  | 2534698 | 2533529 | 105303  | 104134  | 257570  | 256401  | 670303 | 669134 | 395069    | 393900  |
| 908 | BPSL0853          | 17 | 381941  | 380724  | 257816  | 256599  | 258811  | 257594  | 380254  | 379037  | 418921  | 417704  | 2536341 | 2535124 | 106946  | 105729  | 259213  | 257996  | 671946 | 670729 | 396712    | 395495  |
| 909 | Chr1_38_IS407A_C  | 17 |         |         |         |         |         |         |         |         |         |         |         |         |         |         |         |         |        |        | 2311172   | 2312193 |
| 910 | BPSL0854          | 17 | 382735  | 382076  | 258610  | 257951  | 259605  | 258946  | 381048  | 380389  | 419715  | 419056  | 2537135 | 2536476 | 107740  | 107081  | 260007  | 259348  | 672740 | 672081 | 2310355   | 2311014 |
| 911 | BPSL0855          | 17 | 382851  | 383714  | 258726  | 259589  | 259721  | 260584  | 381164  | 382027  | 419831  | 420694  | 2537251 | 2538114 | 107856  | 108719  | 260123  | 260986  | 672856 | 673719 | 2310239   | 2309376 |
| 912 | BPSL0856          | 17 | 384130  | 383993  | 260769  | 260005  | 261764  | 261000  | 383207  | 382443  | 421874  | 421110  | 2539295 | 2538393 | 109900  | 108998  | 262167  | 261265  | 674900 | 673998 | 2308195   | 2309097 |
| 913 | BPSL0857          | 17 | 385772  | 384894  | 261647  | 260769  | 262642  | 261764  | 384085  | 383207  | 422752  | 421874  | 2540173 | 2539295 | 110778  | 109900  | 263045  | 262167  | 675778 | 674900 | 2307317   | 2308195 |
| 914 | BPSL0858          | 17 | 385957  | 386838  | 261832  | 262713  | 262827  | 263708  | 384270  | 385151  | 422937  | 423818  | 2540358 | 2541239 | 110963  | 111844  | 263230  | 264111  | 675963 | 676844 | 2307132   | 2306251 |
| 915 | BPSL0859          | 17 | 388903  | 387362  | 264778  | 263237  | 265773  | 264232  | 387216  | 385675  | 425883  | 424342  | 2543304 | 2541763 | 113834  | 112368  | 266176  | 264635  | 678909 | 677368 | 2304186   | 2305727 |
| 916 | BPSL0860          | 17 | 389451  | 388900  | 265326  | 264775  | 266321  | 265770  | 387764  | 387213  | 426431  | 425880  | 2543852 | 2543301 | 114449  | 113898  | 266724  | 266173  | 679457 | 678906 | 2303637   | 2304137 |
| 917 | BPSL0861          | 17 | 389469  | 390695  | 265344  | 266570  | 266339  | 267565  | 387782  | 389008  | 426449  | 427675  | 2543870 | 2545096 | 114467  | 115693  | 266742  | 267968  | 679475 | 680701 | 2303619   | 2302393 |
| 918 | BPSL0862          | 17 | 390711  | 391232  | 266586  | 267107  | 267581  | 268102  | 389024  | 389545  | 427691  | 428212  | 2545112 | 2545633 | 115709  | 116230  | 267984  | 268505  | 680717 | 681238 | 2302377   | 2301856 |
| 919 | BPSL0863          | 17 | 391235  | 392233  | 267110  | 268108  | 268105  | 269103  | 389548  | 390546  | 428215  | 429213  | 2545636 | 2546634 | 116233  | 117231  | 268508  | 269506  | 681241 | 682239 | 2301853   | 2300855 |
| 920 | BPSL0864          | 17 | 394073  | 392511  | 269948  | 268386  | 270943  | 269381  | 392386  | 390824  | 431053  | 429491  | 2548474 | 2546912 | 119071  | 117509  | 271346  | 269784  | 684079 | 682517 | 2299015   | 2300577 |
| 921 | BPSL0865          | 17 | 394203  | 394691  | 270078  | 270566  | 271073  | 271561  | 392516  | 393004  | 431183  | 431671  | 2548604 | 2549092 | 119201  | 119689  | 271476  | 271964  | 684209 | 684697 | 2298885   | 2298397 |
| 922 | BPSL0866          | 17 | 394803  | 395408  | 270678  | 271283  | 271673  | 272278  | 393116  | 393721  | 431783  | 432388  | 2549204 | 2549809 | 119801  | 120406  | 272076  | 272681  | 684809 | 685414 | 2298285   | 2297680 |
| 923 | BPSL0867          | 17 | 396129  | 395647  | 272004  | 271522  | 272999  | 272517  | 394442  | 393960  | 433109  | 432627  | 2550530 | 2550048 | 121127  | 120645  | 273402  | 272920  | 686135 | 685653 | 2296959   | 2297441 |
| 924 | BPSL0868          | 17 | 396266  | 397312  | 272141  | 273187  | 273136  | 274182  | 394579  | 395625  | 433246  | 434292  | 2550667 | 2551713 | 121264  | 122310  | 273539  | 274585  | 686272 | 687318 | 2296822   | 2295776 |
| 925 | BPSL0869          | 17 | 398437  | 397511  | 274312  | 273386  | 275307  | 274381  | 396750  | 395824  | 435417  | 434491  | 2552838 | 2551912 | 123435  | 122509  | 275710  | 274784  | 688443 | 687517 | 2294651   | 2295577 |
| 926 | BPSL0870          | 17 | 398851  | 399183  | 274726  | 275058  | 275721  | 276053  | 397164  | 397496  | 435831  | 436163  | 2553252 | 2553584 | 123849  | 124181  | 276124  | 276456  | 688857 | 689189 | 2294237   | 2293905 |
| 927 | BPSL0871          | 17 | 399693  | 399418  | 275568  | 275293  | 276563  | 276288  | 398006  | 397731  | 436673  | 436398  | 2554094 | 2553819 | 124691  | 124416  | 276966  | 276691  | 689699 | 689524 | 2293395   | 2293670 |
| 928 | BPSL0872          | 17 | 400098  | 401645  | 275973  | 277520  | 276968  | 278515  | 398411  | 399958  | 437078  | 438625  | 2554499 | 2556046 | 125096  | 126643  | 277371  | 278918  | 690102 | 691649 | 2292992   | 2291445 |
| 929 | BPSL0873          | 17 | 401658  | 402368  | 277533  | 278243  | 278528  | 279238  | 399971  | 400681  | 438638  | 439477  | 2556059 | 2556898 | 126656  | 127495  | 278931  | 279770  | 691662 | 692501 | 2291432   | 2290593 |
| 930 | BPSL0874          | 17 | 403516  | 402761  | 279391  | 278636  | 280386  | 279631  | 401829  | 401074  | 440497  | 439742  | 2557918 | 2557163 | 128515  | 127760  | 280790  | 280035  | 693521 | 692766 | 2289573   | 2290328 |
| 931 | Chr1_39a_ISBma2_A |    | 403674  | 405246  | 279549  | 281121  | 280544  | 282116  | 401987  | 403559  | 440655  | 442227  | 2558075 | 2559647 | 128672  | 130244  | 280947  | 282519  | 693678 | 695250 | 2287844   | 2289416 |
| 932 | Chr1_39b_ISBma2_A |    | 2362064 | 2363635 | 2254925 | 2256496 | 2270282 | 2271853 | 2350107 | 2351678 | 2511431 | 2513003 | 1061840 | 1063411 | 2113105 | 2114677 | 2318443 | 2320015 | 583222 | 584794 | 2344825   | 2346397 |
| 933 | BPSL0875          | 18 | 2361340 | 2361999 | 2254201 | 2254860 | 2269558 | 2270217 | 2349383 | 2350042 | 2510707 | 2511366 | 1061116 | 1061775 | 2112381 | 2113040 | 2317719 | 2318378 | 582498 | 583157 | 2344101   | 2344760 |
| 934 | BPSL0876          | 18 | 2360295 | 2361128 | 2253156 | 2253989 | 2268513 | 2269346 | 2348338 | 2349171 | 2509662 | 2510495 | 1060071 | 1060904 | 2111336 | 2112169 | 2316674 | 2317507 | 581453 | 582286 | 2343056   | 2343889 |
| 935 | BPSL0877          | 18 | 2359960 | 2360163 | 2252821 | 2253024 | 2268178 | 2268381 | 2348003 | 2348206 | 2509327 | 2509530 | 1059736 | 1059939 | 2111001 | 2111204 | 2316339 | 2316542 | 581118 | 581321 | 2342721   | 2342924 |
| 936 | BPSL0878          | 18 | 2359050 | 2359976 | 2251812 | 2252837 | 2267169 | 2268194 | 2346994 | 2348019 | 2508318 | 2509343 | 1058727 | 1059752 | 2109992 | 2111017 | 2315330 | 2316355 | 580109 | 581134 | 2341715   | 2342737 |
| 937 | Chr1_40a_IS407A_C | 18 |         |         |         |         |         |         |         |         |         |         |         |         |         |         |         |         |        |        | 2337504   | 2338663 |
| 938 | Chr1_40b_IS407A_C | 18 |         |         |         |         |         |         |         |         |         |         |         |         |         |         |         |         |        |        | 2312315   | 2313344 |
| 939 | BPSL0879          | 18 | 2358492 | 2357113 | 2251354 | 2249975 | 2266711 | 2265332 | 2345687 | 2345208 | 2507983 | 2506604 | 1058269 | 1056890 | 2109534 | 2108155 | 2314872 | 2313493 | 579651 | 578272 | 2313587   | 2314966 |
| 940 | BPSL0880          | 18 | 2356913 | 2356338 | 2249775 | 2249200 | 2265132 | 2264557 | 2345008 | 2344433 | 2506404 | 2505829 | 1056690 | 1056115 | 2107955 | 2107380 | 2313293 | 2312718 | 578072 | 577497 | 2315166   | 2315741 |
| 941 | Chr1_41_ISBma2_A  |    | 2355339 | 2356228 | 2248201 | 2249090 | 2263558 | 2264447 | 2343434 | 2344323 | 2504830 | 2505719 | 1055116 | 1056005 | 2106381 | 2107270 | 2311719 | 2312608 | 576498 | 577387 | 2315851   | 2316740 |
| 942 | Chr1_42a_IS407A_A |    |         |         |         |         |         |         |         |         |         |         |         |         |         |         |         |         |        |        | 2316739   | 2317974 |
| 943 | Chr1_42b_IS407A_A |    | 2354105 | 2355340 | 2246967 | 2248202 | 2262324 | 2263559 | 2342200 | 2343435 | 2503596 | 2504831 | 1053882 | 1055117 | 2105147 | 2106382 | 2310485 | 2311720 | 575340 | 576499 | 2337504   | 2338663 |
| 944 | BPSL0882          | 19 | 2352858 | 2354060 | 2245849 | 2246922 | 2261077 | 2262279 | 2340953 | 2342155 | 2502349 | 2503551 |         |         | 2103900 | 2105102 | 2309238 | 2310440 | 574240 | 575403 | 2336404   | 2337567 |
| 945 | BPSL0883          | 19 | 2351869 | 2352621 | 2244730 | 2245482 | 2260088 | 2260840 | 2339964 | 2340716 | 2501360 | 2502112 |         |         | 2102911 | 2103663 | 2308249 | 2309001 | 573251 | 574003 | 2335415   | 2336167 |
| 946 | BPSL0884          | 19 | 2351784 | 2351260 | 2244645 | 2244121 | 2260003 | 2259479 | 2339879 | 2339355 | 2501275 | 2500751 |         |         | 2102826 | 2102302 | 2308164 | 2307640 | 573166 | 572642 | 2335330   | 2334806 |
| 947 | BPSL0885          | 19 | 2351241 | 2350222 | 2244102 | 2243083 | 2259460 | 2258441 | 2339336 | 2338317 | 2500732 | 2499713 |         |         | 2102283 | 2101264 | 2307621 | 2306602 | 572623 | 571604 | 2334787   | 2333768 |
| 948 | BPSL0886          | 19 | 2349695 | 2349093 | 2242556 | 2241954 | 2257914 | 2257312 | 2337790 | 2337188 | 2499186 | 2498584 |         |         | 2100721 | 2100119 | 2306059 | 2305457 | 571061 | 570459 | 2333225   | 2332623 |
| 949 | BPSL0887          | 19 | 2347684 | 2348955 | 2240545 | 2241816 | 2255903 | 2257174 | 2335779 | 2337050 | 2497175 | 2498446 |         |         | 2098710 | 2099981 | 2304048 | 2305319 | 569050 | 570321 | 2331214   | 2332485 |
| 950 | BPSL0888          | 19 | 2345602 | 2347038 | 2238463 | 2239899 | 2253821 | 2255257 | 2333697 | 2335133 | 2495045 | 2496481 |         |         | 2096588 | 2098024 | 2301950 | 2303386 | 566984 | 568420 | 2329068   | 2330504 |
| 951 | BPSL0889          | 19 | 2345305 | 2345084 | 2238166 | 2237945 | 2253524 | 2253303 | 2333400 | 2333179 | 2494748 | 2494527 |         |         | 2096291 | 2095959 | 2301653 | 2301321 | 566687 | 566466 | 2328771   | 2328550 |
| 952 | BPSL0890          | 19 | 2343701 | 2345059 | 2236562 | 2237920 | 2251920 | 2253278 | 2331796 | 2333154 | 2493144 | 2494502 |         |         | 2094622 | 2095980 | 2299984 | 2301342 | 565083 | 566441 | 2327102   | 2328424 |
| 953 | BPSL0891          | 19 | 2342239 | 2342982 | 2235100 | 2235843 | 2250458 | 2251201 | 2330334 | 2331077 | 2491682 | 2492425 |         |         | 2093160 | 2093903 | 2298522 | 2299265 | 563621 | 564364 | 2325640   | 2326383 |
| 954 | BPSL0892          | 19 | 2342070 | 2341228 | 2234931 | 2234089 | 2250289 | 2249447 | 2330165 | 2329323 | 2491513 | 2490671 |         |         | 2092991 | 2092149 | 2298353 | 2297511 | 563452 | 562610 | 2325471</ |         |

|               |    |                   |         |         |         |         |         |         |         |         |         |         |         |         |         |         |         |         |         |         |         |         |
|---------------|----|-------------------|---------|---------|---------|---------|---------|---------|---------|---------|---------|---------|---------|---------|---------|---------|---------|---------|---------|---------|---------|---------|
| 956 BPSL0893  | 19 | 2335855           | 2337966 | 2228614 | 2230725 | 2244074 | 2246185 | 2323950 | 2326061 | 2485343 | 2487454 |         |         | 2086836 | 2088947 | 2292213 | 2294324 | 557301  | 559412  | 2319320 | 2321431 |         |
| 957 BPSL0894  | 19 | 2335045           | 2335551 | 2227804 | 2228310 | 2243264 | 2243770 | 2323140 | 2323646 | 2484533 | 2485039 |         |         | 2086026 | 2086532 | 2291403 | 2291909 | 556491  | 556997  | 2318510 | 2319106 |         |
| 958           |    | Chr1_43a_IS407A_A | 2333274 | 2334509 | 2226033 | 2227268 | 2241493 | 2242728 | 2321369 | 2322604 | 2482748 | 2483983 | 1053882 | 1055117 | 2084226 | 2085461 | 2289894 | 2291129 | 554720  | 555955  | 2316739 | 2317974 |
| 959           |    | Chr1_43b_IS407A_A | 511643  | 512878  | 387963  | 389198  | 389122  | 390357  | 509988  | 511223  | 551212  | 552447  | 1026593 | 1027828 | 134379  | 135614  | 403287  | 404522  | 699385  | 700620  | 2282474 | 2283709 |
| 960 BPSL0895  | 20 | 513603            | 513028  | 389923  | 389348  | 391082  | 390507  | 511948  | 511373  | 553172  | 552597  | 1028553 | 1027978 | 133654  | 134229  | 401322  | 401897  | 698660  | 699235  | 2284434 | 2283859 |         |
| 961 BPSL0896  | 20 | 513871            | 515127  | 390191  | 391447  | 391350  | 392606  | 512216  | 513472  | 553440  | 554696  | 1028821 | 1030077 | 133386  | 132130  | 401054  | 399798  | 698392  | 697136  | 2284702 | 2285958 |         |
| 962 BPSL0897  | 20 | 515298            | 516905  | 391618  | 393225  | 392777  | 394384  | 513643  | 515250  | 554867  | 556474  | 1030248 | 1031855 | 131959  | 130352  | 399627  | 398020  | 696965  | 695358  | 2286129 | 2287736 |         |
| 963           |    | Chr1_44a_ISBma2_A | 517013  | 518585  | 393333  | 394905  | 394492  | 396064  | 515358  | 516930  | 556580  | 558152  | 1031963 | 1033543 | 128672  | 130244  | 396339  | 397912  | 693678  | 695250  | 2287844 | 2289416 |
| 964           |    | Chr1_44b_ISBma2_A | 2362064 | 2363635 | 2254925 | 2256496 | 2270282 | 2271853 | 2350107 | 2351678 | 2511431 | 2513003 | 1061840 | 1063411 | 2113105 | 2114677 | 2318443 | 2320015 | 583222  | 584794  | 2344825 | 2346397 |
| 965 BPSL0898  | 21 | 2363887           | 2363687 | 2256748 | 2256548 | 2272105 | 2271905 | 2351930 | 2351730 | 2513174 | 2513055 | 1063663 | 1063463 | 2114929 | 2114729 |         |         | 585046  | 584846  | 2346649 | 2346449 |         |
| 966 BPSL0898a | 21 | 2364420           | 2364731 | 2257281 | 2257592 | 2272638 | 2272949 | 2352463 | 2352774 | 2513328 | 2513639 | 1064196 | 1064507 | 2115462 | 2115773 | 2320085 | 2320141 | 585579  | 585890  | 2347182 | 2347493 |         |
| 967 BPSL0899  | 21 | 2364731           | 2367028 | 2257592 | 2259889 | 2272949 | 2275246 | 2352774 | 2355071 | 2513639 | 2515936 | 1064507 | 1066804 | 2115773 | 2118070 | 2320141 | 2321685 | 585890  | 588187  | 2347493 | 2349790 |         |
| 968 BPSL0900  | 21 | 2367131           | 2367802 | 2259992 | 2260663 | 2275349 | 2276020 | 2355174 | 2355845 | 2516039 | 2516710 | 1066907 | 1067578 | 2118173 | 2118844 | 2322627 | 2323298 | 588290  | 588961  | 2349893 | 2350564 |         |
| 969           |    | Chr1_45a_IS407A_A | 2367803 | 2369038 | 2260664 | 2261899 | 2276021 | 2277256 | 2355846 | 2357081 | 2516711 | 2517946 | 1067579 | 1068814 | 2118845 | 2120080 | 2323299 | 2324534 | 588962  | 590197  | 2350565 | 2351860 |
| 970           |    | Chr1_45b_IS407A_A | 2333274 | 2334509 | 2226033 | 2227268 | 2241493 | 2242728 | 2321369 | 2322604 | 2482748 | 2483983 | 1053882 | 1055117 | 2084226 | 2085461 | 2289894 | 2291129 | 2640788 | 2642023 | 2399992 | 2401227 |
| 971 BPSL0901  | 22 | 2333081           | 2332338 | 2225840 | 2225097 | 2241300 | 2240557 | 2321176 | 2320433 | 2482555 | 2481812 | 1053689 | 1052949 | 2084033 | 2083293 | 2289701 | 2288958 | 2640595 | 2639852 | 2399799 | 2399056 |         |
| 972 BPSL0902  | 22 | 2332170           | 2331391 | 2224929 | 2224150 | 2240389 | 2239610 | 2320265 | 2319486 | 2481644 | 2480865 | 1052781 | 1052002 | 2083125 | 2082346 | 2288790 | 2288011 | 2639684 | 2638905 | 2398888 | 2398109 |         |
| 973 BPSL0903  | 22 | 2330853           | 2331296 | 2223612 | 2224055 | 2239072 | 2239515 | 2318948 | 2319391 | 2480327 | 2480770 | 1051464 | 1051907 | 2081808 | 2082251 | 2287473 | 2287916 | 2638367 | 2638810 | 2397571 | 2398014 |         |
| 974 BPSL0904  | 22 | 2329578           | 2330786 | 2223337 | 2223545 | 2237797 | 2239005 | 2317673 | 2318881 | 2479052 | 2480260 | 1050189 | 1051397 | 2080533 | 2081741 | 2286198 | 2287406 | 2637092 | 2638300 | 2396296 | 2397504 |         |
| 975 BPSL0905  | 22 | 2329016           | 2329513 | 2221775 | 2222272 | 2237235 | 2237732 | 2317111 | 2317608 | 2478490 | 2478987 | 1049627 | 1050124 | 2079971 | 2080468 | 2285636 | 2286133 | 2636530 | 2637027 | 2395734 | 2396231 |         |
| 976 BPSL0906  | 22 | 2326179           | 2329013 | 2218938 | 2221772 | 2234398 | 2237232 | 2314274 | 2317108 | 2475653 | 2478487 | 1046790 | 1049624 | 2077134 | 2079968 | 2282799 | 2285633 | 2633693 | 2636527 | 2392897 | 2395731 |         |
| 977 BPSL0907  | 22 | 2325075           | 2326064 | 2217834 | 2218823 | 2332394 | 2324283 | 2313170 | 2314159 | 2474549 | 2475538 | 1045686 | 1046675 | 2076030 | 2077019 | 2281695 | 2282684 | 2632589 | 2633578 | 2391793 | 2392782 |         |
| 978 BPSL0908  | 22 | 2324950           | 2324291 | 2217709 | 2217050 | 2233169 | 2232510 | 2313045 | 2312386 | 2474424 | 2473765 | 1045561 | 1044902 | 2075905 | 2075246 | 2281570 | 2280911 | 2632464 | 2631805 | 2391668 | 2391009 |         |
| 979 BPSL0909  | 22 | 2324291           | 2323032 | 2217050 | 2215791 | 2232510 | 2231251 | 2312386 | 2311127 | 2473765 | 2472506 | 1044902 | 1043643 | 2075246 | 2073987 | 2280911 | 2279652 | 2631805 | 2630546 | 2391009 | 2389750 |         |
| 980 BPSL0910  | 22 | 2323017           | 2321668 | 2215776 | 2214427 | 2231236 | 2229887 | 2311112 | 2309763 | 2472491 | 2471142 | 1043628 | 1042279 | 2073972 | 2072623 | 2279637 | 2278288 | 2630531 | 2629182 | 2389735 | 2388386 |         |
| 981 BPSL0911  | 22 | 2321468           | 2320275 | 2214227 | 2213034 | 2229687 | 2228494 | 2309563 | 2308370 | 2470942 | 2469749 | 1042079 | 1040886 | 2072423 | 2071263 | 2278088 | 2276895 | 2628982 | 2627789 | 2388186 | 2386993 |         |
| 982 BPSL0912  | 22 | 2320103           | 2318970 | 2212862 | 2211729 | 2228322 | 2227189 | 2308198 | 2307065 | 2469577 | 2468444 | 1040714 | 1039581 | 2071058 | 2069925 | 2276723 | 2275590 | 2627617 | 2626484 | 2386821 | 2385688 |         |
| 983 BPSL0913  | 22 | 2318970           | 2318089 | 2211729 | 2210848 | 2227189 | 2226308 | 2307065 | 2306184 | 2468444 | 2467563 | 1039581 | 1038700 | 2069925 | 2069044 | 2275590 | 2274709 | 2626484 | 2625603 | 2385688 | 2384807 |         |
| 984 BPSL0914  | 22 | 2316248           | 2317891 | 2209007 | 2210650 | 2224467 | 2226110 | 2304343 | 2305986 | 2465722 | 2467365 | 1036859 | 1038502 | 2067203 | 2068846 | 2272868 | 2274511 | 2623762 | 2625405 | 2382966 | 2384609 |         |
| 985 BPSL0915  | 22 | 2315958           | 2316122 | 2208717 | 2208881 | 2224177 | 2224341 | 2304053 | 2304217 | 2465432 | 2465596 | 1036569 | 1036733 | 2066913 | 2067077 | 2272578 | 2272742 | 2623472 | 2623636 | 2382676 | 2382840 |         |
| 986 BPSL0916  | 22 | 2315707           | 2315937 | 2208466 | 2208696 | 2223926 | 2224156 | 2303802 | 2304032 | 2465181 | 2465411 | 1036318 | 1036548 | 2066662 | 2066892 | 2272327 | 2272557 | 2623221 | 2623451 | 2382425 | 2382655 |         |
| 987 BPSL0917  | 22 | 2314703           | 2315410 | 2207462 | 2208169 | 2222922 | 2223629 | 2302798 | 2303505 | 2464177 | 2464884 | 1035314 | 1036021 | 2065658 | 2066365 | 2271323 | 2272030 | 2622217 | 2622924 | 2381421 | 2382128 |         |
| 988 BPSL0918  | 22 | 2314438           | 2313986 | 2207197 | 2206745 | 2222657 | 2222205 | 2302533 | 2302081 | 2463912 | 2463460 | 1035049 | 1034597 | 2065393 | 2064941 | 2271058 | 2270606 | 2621952 | 2621500 | 2381156 | 2380704 |         |
| 989 BPSL0919  | 22 | 2313980           | 2313003 | 2206739 | 2205762 | 2222199 | 2221222 | 2302075 | 2301098 | 2463454 | 2462477 | 1034591 | 1033614 | 2064935 | 2063958 | 2270600 | 2269623 | 2621494 | 2620517 | 2380698 | 2379721 |         |
| 990           |    | Chr1_46a_ISBma2_A | 2311360 | 2312932 | 2204119 | 2205691 | 2219579 | 2221151 | 2299455 | 2301027 | 2460834 | 2462406 | 1031963 | 1033543 | 2062315 | 2063887 | 2267980 | 2269552 | 2618874 | 2620446 | 2378078 | 2379650 |
| 991           |    | Chr1_46b_ISBma2_A |         |         |         |         |         |         |         |         |         |         | 2558075 | 2559647 |         |         |         |         |         |         |         |         |
| 992 BPSL0919A | 23 | 2311145           | 2310627 | 2203904 | 2203386 | 2219364 | 2218846 | 2299240 | 2298722 | 2460619 | 2460101 | 2559859 | 2560377 | 2062103 | 2061585 | 2267768 | 2267250 | 2618659 | 2618141 | 2377863 | 2377345 |         |
| 993           |    | Chr1_47a_IS407A_A | 2309174 | 2310409 | 2201933 | 2203168 | 2217393 | 2218628 | 2297269 | 2298504 | 2458648 | 2459883 | 2560595 | 2561830 | 2060132 | 2061367 | 2265797 | 2267032 | 2616688 | 2617923 | 2375892 | 2377127 |
| 994           |    | Chr1_47b_IS407A_A | 2070441 | 2071676 | 1963199 | 1964434 | 1978651 | 1979886 | 2058486 | 2059721 | 2219825 | 2221060 | 907313  | 908548  | 252371  | 253606  |         |         | 935361  | 936596  | 2040335 | 2041570 |
| 995 BPSL0920  | 24 | 2070428           | 2069481 | 1963186 | 1962239 | 1978638 | 1977691 | 2058473 | 2057526 | 2219812 | 2218865 | 907316  | 906999  | 253603  | 253920  |         |         | 936609  | 937556  | 2040322 | 2039375 |         |
| 996 BPSL0921  | 24 | 2069467           | 2068301 | 1962225 | 1961059 | 1977677 | 1976511 | 2057512 | 2056346 | 2218851 | 2217685 | 906985  | 905819  | 253934  | 255100  |         |         | 937570  | 938736  | 2039361 | 2038195 |         |
| 997 BPSL0922  | 24 | 2068235           | 2067465 | 1960993 | 1960223 | 1976445 | 1975675 | 2056280 | 2055510 | 2217619 | 2216849 | 905753  | 904983  | 255166  | 255936  |         |         | 938802  | 939572  | 2038055 | 2037432 |         |
| 998 BPSL0923  | 24 | 2067462           | 2066749 | 1960220 | 1959507 | 1975672 | 1974959 | 2055507 | 2054794 | 2216846 | 2216133 | 904980  | 904267  | 255939  | 256652  |         |         | 939575  | 940288  | 2037429 | 2036716 |         |
| 999 BPSL0924  | 24 | 2066449           | 2065784 | 1959207 | 1958542 | 1974659 | 1973994 | 2054494 | 2053829 | 2215833 | 2215168 | 903967  | 903302  | 256952  | 257617  |         |         | 940588  | 941253  | 2036416 | 2035751 |         |
| 1000 BPSL0925 | 24 | 2065150           | 2065605 | 1957908 | 1958363 | 1973360 | 1973815 | 2053195 | 2053650 | 2214534 | 2214989 | 902668  | 903123  | 258251  | 257796  |         |         | 941887  | 941432  | 2035117 | 2035572 |         |
| 1001 BPSL0926 | 24 | 2063949           | 2065130 | 1956707 | 1957888 | 1972159 | 1973340 | 2051994 | 2053175 | 2213333 | 2214514 | 901467  | 902648  | 259452  | 258271  |         |         | 943088  | 941907  | 2033916 | 2035097 |         |
| 1002 BPSL0927 | 24 | 2062641           | 2063669 | 1955399 | 1956427 | 1970851 | 1971879 | 2050686 | 2051714 | 2212025 | 2213053 | 900159  | 901187  | 260760  | 259732  |         |         | 944396  | 943368  | 2032608 | 2033636 |         |
| 1003 BPSL0928 | 24 | 2062558           | 2061536 | 1955316 | 1954294 | 1970768 | 1969746 | 2050603 | 2049581 | 2211942 | 2210920 | 900076  | 899054  | 260843  | 261865  |         |         | 944479  | 945     |         |         |         |

|      |           |               |                  |         |         |         |         |         |         |         |         |         |         |         |         |         |         |         |         |         |         |         |         |
|------|-----------|---------------|------------------|---------|---------|---------|---------|---------|---------|---------|---------|---------|---------|---------|---------|---------|---------|---------|---------|---------|---------|---------|---------|
| 1007 | BPSL0932  | 24            | 2059035          | 2059985 | 1951793 | 1952743 | 1967245 | 1968195 | 2047080 | 2048030 | 2208419 | 2209369 | 896544  | 897503  | 264375  | 263416  |         |         | 948002  | 947052  | 2029002 | 2029952 |         |
| 1008 | BPSL0933  | 24            | 2057937          | 2058830 | 1950695 | 1951588 | 1966147 | 1967040 | 2045982 | 2046875 | 2207321 | 2208214 | 895446  | 896339  | 265473  | 264580  |         |         | 949100  | 948207  | 2027904 | 2028797 |         |
| 1009 | BPSL0934  | 24            | 2057815          | 2056922 | 1950573 | 1949680 | 1966025 | 1965132 | 2045860 | 2044967 | 2207199 | 2206306 | 895324  | 894431  | 265595  | 266488  |         |         | 949222  | 950115  | 2027782 | 2026889 |         |
| 1010 | BPSL0935  | 24            | 2056027          | 2056710 | 1948785 | 1949468 | 1964237 | 1964920 | 2044072 | 2044755 | 2205411 | 2206094 | 893536  | 894219  | 267383  | 266700  |         |         | 951010  | 950327  | 2025994 | 2026677 |         |
| 1011 | BPSL0936  | 24            | 2055116          | 2056009 | 1947874 | 1948767 | 1963326 | 1964219 | 2043161 | 2044054 | 2204500 | 2205393 | 892625  | 893518  | 268294  | 267401  |         |         | 951921  | 951028  | 2025083 | 2025976 |         |
| 1012 | BPSL0937  | 24            | 2054252          | 2055031 | 1947010 | 1947789 | 1962462 | 1963241 | 2042297 | 2043076 | 2203636 | 2204415 | 891761  | 892540  | 269158  | 268379  |         |         | 952785  | 952006  | 2024219 | 2024998 |         |
| 1013 | BPSL0938  | 24            | 2054120          | 2053560 | 1946878 | 1946318 | 1962330 | 1961770 | 2042165 | 2041605 | 2203504 | 2202944 | 891629  | 891069  | 269290  | 269850  |         |         | 952917  | 953477  | 2024087 | 2023527 |         |
| 1014 | BPSL0938A | 24            | 2053517          | 2053062 | 1946275 | 1945820 | 1961727 | 1961272 | 2041562 | 2041107 | 2202901 | 2202446 | 891026  | 890571  | 269893  | 270348  |         |         | 953520  | 953975  | 2023484 | 2023029 |         |
| 1015 |           |               | Chr1_48_IS407A_A | 2051541 | 2052776 | 1944299 | 1945534 | 1959751 | 1960986 | 2039586 | 2040821 | 2200925 | 2202160 | 889050  | 890285  | 270634  | 271869  |         |         | 954151  | 955386  | 2021618 | 2022853 |
| 1016 | BPSL0939  |               |                  |         |         |         |         |         |         |         |         |         |         |         |         |         |         |         |         |         |         |         |         |
| 1017 | BPSL0940  |               |                  |         |         |         |         |         |         |         |         |         |         |         |         |         |         |         |         |         |         |         |         |
| 1018 | BPSL0941  |               |                  |         |         |         |         |         |         |         |         |         |         |         |         |         |         |         |         |         |         |         |         |
| 1019 | BPSL0942  |               |                  |         |         |         |         |         |         |         |         |         |         |         |         |         |         |         |         |         |         |         |         |
| 1020 | BPSL0943  |               |                  |         |         |         |         |         |         |         |         |         |         |         |         |         |         |         |         |         |         |         |         |
| 1021 | BPSL0944  | GI5           |                  |         |         |         |         |         |         |         |         |         |         |         |         |         |         |         |         |         |         |         |         |
| 1022 | BPSL0945  | GI5           |                  |         |         |         |         |         |         |         |         |         |         |         |         |         |         |         |         |         |         |         |         |
| 1023 | BPSL0946  | GI5           |                  |         |         |         |         |         |         |         |         |         |         |         |         |         |         |         |         |         |         |         |         |
| 1024 | BPSL0947  | GI5           |                  |         |         |         |         |         |         |         |         |         |         |         |         |         |         |         |         |         |         |         |         |
| 1025 | BPSL0948  | GI5           |                  |         |         |         |         |         |         |         |         |         |         |         |         |         |         |         |         |         |         |         |         |
| 1026 | BPSL0949  | GI5           |                  |         |         |         |         |         |         |         |         |         |         |         |         |         |         |         |         |         |         |         |         |
| 1027 | BPSL0950  | GI5_IS407A    |                  |         |         |         |         |         |         |         |         |         |         |         |         |         |         |         |         |         |         |         |         |
| 1028 | BPSL0951  | GI5_IS407A    |                  |         |         |         |         |         |         |         |         |         |         |         |         |         |         |         |         |         |         |         |         |
| 1029 | BPSL0952  | GI5           |                  |         |         |         |         |         |         |         |         |         |         |         |         |         |         |         |         |         |         |         |         |
| 1030 |           |               | Chr1_49_IS407A_A | 683232  | 684467  | 560092  | 561327  | 563350  | 564585  | 678191  | 679426  | 719456  | 720691  | 2955982 | 2957217 | 1661173 | 1662408 | 1867070 | 1868305 | 2356417 | 2357652 | 652265  | 653500  |
| 1031 | BPSL0953  | GI5_variation | 25a              | 684553  | 684470  | 561413  | 561330  | 564671  | 564588  | 679512  | 679429  | 720777  | 720694  | 2957303 | 2957220 | 1661087 | 1661170 | 1866984 | 1867067 | 2356331 | 2356414 | 653586  | 653503  |
| 1032 | BPSL0954  |               | 25a              | 685383  | 685048  | 562243  | 561908  | 565501  | 565166  | 680342  | 680007  | 721607  | 721272  | 2958133 | 2957798 | 1660257 | 1660592 | 1866154 | 1866489 | 2355501 | 2355836 | 654416  | 654081  |
| 1033 | BPSL0955  |               | 25a              | 686321  | 685383  | 563181  | 562243  | 566439  | 565501  | 681280  | 680342  | 722545  | 721607  | 2959071 | 2958133 | 1659319 | 1660257 | 1865216 | 1866154 | 2354563 | 2355501 | 655354  | 654416  |
| 1034 | BPSL0956  |               | 25a              | 686541  | 688217  | 563401  | 565077  | 566659  | 568335  | 681500  | 683176  | 722765  | 724441  | 2959291 | 2960967 | 1659099 | 1657423 | 1864996 | 1863320 | 2354343 | 2352667 | 655574  | 657250  |
| 1035 | BPSL0957  |               | 25a              | 688245  | 688784  | 565105  | 565644  | 568363  | 568902  | 683204  | 683743  | 724469  | 725008  | 2960995 | 2961534 | 1657395 | 1656856 | 1863292 | 1862753 | 2352639 | 2352100 | 657278  | 657817  |
| 1036 | BPSL0958  |               | 25a              | 688784  | 689530  | 565644  | 566390  | 568902  | 569648  | 683743  | 684489  | 725008  | 725754  | 2961534 | 2962280 | 1656856 | 1656110 | 1862753 | 1862007 | 2352100 | 2351354 | 657817  | 658563  |
| 1037 | BPSL0959  |               | 25a              | 689614  | 690576  | 566474  | 567436  | 569732  | 570694  | 684573  | 685535  | 725838  | 726800  | 2962364 | 2963326 | 1656026 | 1655064 | 1861923 | 1860961 | 2351270 | 2350308 | 658647  | 659609  |
| 1038 | BPSL0960  |               | 25a              | 690602  | 691915  | 567462  | 568775  | 570720  | 572033  | 685561  | 686874  | 726826  | 728139  | 2963352 | 2964665 | 1655038 | 1653725 | 1860935 | 1859622 | 2350282 | 2348969 | 659635  | 660948  |
| 1039 | BPSL0961  |               | 25a              | 691915  | 692748  | 568775  | 569608  | 572033  | 572866  | 686874  | 687707  | 728139  | 728972  | 2964665 | 2965498 | 1653725 | 1652892 | 1859622 | 1858789 | 2348969 | 2348136 | 660948  | 661781  |
| 1040 | BPSL0962  |               | 25a              | 693348  | 692965  | 570208  | 569825  | 573466  | 573083  | 688307  | 687924  | 729572  | 729189  | 2966098 | 2965715 | 1652292 | 1652675 | 1858189 | 1858572 | 2347536 | 2347919 | 662381  | 661998  |
| 1041 | BPSL0963  |               | 25a              | 694531  | 693383  | 571391  | 570243  | 574649  | 573501  | 689490  | 688342  | 730755  | 729607  | 2967281 | 2966133 | 1651109 | 1652257 | 1857006 | 1858154 | 2346353 | 2347501 | 663564  | 662416  |
| 1042 | BPSL0964  |               | 25a              | 695632  | 694538  | 572492  | 571398  | 575750  | 574656  | 690591  | 689497  | 731856  | 730762  | 2968382 | 2967288 | 1650008 | 1651102 | 1855905 | 1856999 | 2345252 | 2346346 | 664665  | 663571  |
| 1043 | BPSL0965  |               | 25a              | 695753  | 697261  | 572613  | 574121  | 575871  | 577379  | 690712  | 692220  | 731977  | 733485  | 2968503 | 2970011 | 1649887 | 1648379 | 1855784 | 1854276 | 2345131 | 2343623 | 664786  | 666294  |
| 1044 | BPSL0966  |               | 25a              | 697308  | 697721  | 574168  | 574581  | 577426  | 577839  | 692267  | 692680  | 733532  | 733945  | 2970058 | 2970471 | 1648332 | 1647919 | 1854229 | 1853816 | 2343576 | 2343163 | 666341  | 666754  |
| 1045 | BPSL0967  |               | 25a              | 697746  | 698453  | 574606  | 575313  | 577864  | 578571  | 692705  | 693412  | 733970  | 734677  | 2970496 | 2971203 | 1647894 | 1647187 | 1853791 | 1853084 | 2343138 | 2342431 | 666779  | 667486  |
| 1046 | BPSL0968  |               | 25a              | 698937  | 698617  | 575797  | 575477  | 579055  | 578735  | 693896  | 693576  | 735161  | 734841  | 2971687 | 2971367 | 1646703 | 1647023 | 1852600 | 1852920 | 2341947 | 2342267 | 667970  | 667650  |
| 1047 |           |               | Chr1_50_ISBma2_A | 699018  | 700590  | 575878  | 577450  | 579136  | 580708  | 693979  | 695542  | 735242  | 736814  | 2971768 | 2973340 | 1645048 | 1646622 | 1850947 | 1852519 | 2340294 | 2341866 | 668438  | 670010  |
| 1048 | BPSL0969  |               | 25a              | 702420  | 700750  | 579280  | 577610  | 582538  | 580868  | 697372  | 695702  | 738644  | 736974  | 2975170 | 2973500 | 1643218 | 1644888 | 1849117 | 1850787 | 2338465 | 2340135 | 671839  | 670169  |
| 1049 | BPSL0970  |               | 25a              | 703490  | 703594  | 579458  | 580426  | 582716  | 583684  | 697550  | 698518  | 738822  | 739790  | 2975348 | 2976316 | 1643040 | 1642072 | 1848939 | 1847971 | 2338287 | 2337319 | 672017  | 672985  |
| 1050 | BPSL0971  |               | 25a              | 703704  | 704591  | 580564  | 581451  | 583822  | 584709  | 698656  | 699543  | 739928  | 740815  | 2976454 | 2977341 | 1641934 | 1641047 | 1847833 | 1846946 | 2337190 | 2336303 | 673114  | 674001  |
| 1051 | BPSL0972  |               | 25a              | 705684  | 704950  | 582544  | 581810  | 585802  | 585068  | 700636  | 699902  | 741908  | 741174  | 2978434 | 2977700 | 1639947 | 1640681 | 1845874 | 1846608 | 2335231 | 2335965 | 675073  | 674339  |
| 1052 | BPSL0973  |               | 25a              | 706344  | 705886  | 583204  | 582746  | 586462  | 586004  | 701296  | 700838  | 742568  | 742110  | 2979094 | 2978636 | 1639287 | 1639745 | 1845214 | 1845672 | 2334571 | 2335029 | 675733  | 675275  |
| 1053 | BPSL0974  |               | 25a              | 706998  | 706687  | 583858  | 583547  | 587116  | 586805  | 701950  | 701639  | 743222  | 742911  | 2979748 | 2979437 | 1638633 | 1638944 | 1844560 | 1844871 | 2333917 | 2334228 | 676387  | 676076  |
| 1054 | BPSL0975  |               | 25a              | 707345  | 706998  | 584205  | 583858  | 587463  | 587116  | 702297  | 701950  | 743569  | 743222  | 2980095 | 2979748 | 1638286 | 1638633 | 1844213 | 1844560 | 2333570 | 2333917 | 676734  | 676387  |
| 1055 | BPSL0976  |               | 25a              | 707885  | 709939  | 584745  | 586799  | 588003  | 590057  | 702837  | 704891  | 744109  | 746163  | 2980634 | 2982688 | 1637747 | 1635693 | 1843674 | 1841620 | 2333030 | 2330976 | 677274  | 679328  |
| 1056 | BPSL0977  |               | 25a              | 710021  | 711019  | 586881  | 587879  | 590139  | 591137  | 704973  | 705971  | 746245  | 747243  | 2982770 | 2983768 | 1635611 | 1634613 | 1841538 | 1840540 | 2330894 | 2329896 | 679410  | 680408  |
| 1057 | BPSL0978  |               | 25a              | 711019  | 711846  | 587879  | 588706  | 591137  | 591964  | 705971  | 706798  | 747243  | 748070  | 2983768 | 2984595 | 1634613 | 1633786 | 1840540 | 1839713 | 2329896 | 2329069 | 680408  | 681235  |

|      |          |                  |        |        |        |        |        |        |        |        |        |        |         |         |         |         |         |         |         |         |         |         |
|------|----------|------------------|--------|--------|--------|--------|--------|--------|--------|--------|--------|--------|---------|---------|---------|---------|---------|---------|---------|---------|---------|---------|
| 1058 | BPSL0979 | 25a              | 711893 | 712948 | 588753 | 589808 | 592011 | 593066 | 706845 | 707900 | 748117 | 749172 | 2984642 | 2985697 | 1633739 | 1632684 | 1839666 | 1838611 | 2329022 | 2327967 | 681282  | 682337  |
| 1059 | BPSL0980 | 25a              | 712958 | 713713 | 589818 | 590573 | 593076 | 593831 | 707910 | 708665 | 749182 | 749937 | 2985707 | 2986462 | 1632674 | 1631919 | 1838601 | 1837846 | 2327957 | 2327202 | 682347  | 682622  |
| 1060 | BPSL0981 | 25a              | 713701 | 714297 | 590561 | 591157 | 593819 | 594415 | 708653 | 709249 | 749925 | 750521 | 2986450 | 2987046 | 1631931 | 1631335 | 1837858 | 1837262 | 2327214 | 2326618 | 683136  | 683732  |
| 1061 | BPSL0982 | 25a              | 715279 | 714446 | 592139 | 591306 | 595397 | 594564 | 710231 | 709398 | 751503 | 750670 | 2988028 | 2987195 | 1630353 | 1631186 | 1836280 | 1837113 | 2325636 | 2326469 | 684714  | 683881  |
| 1062 | BPSL0983 | 25a              | 716377 | 715448 | 593237 | 592308 | 596495 | 595566 | 711329 | 710400 | 752601 | 751672 | 2989126 | 2988197 | 1629255 | 1630184 | 1835182 | 1836111 | 2324538 | 2325467 | 685812  | 684883  |
| 1063 | BPSL0984 | 25a              | 717435 | 716386 | 594295 | 593246 | 597821 | 597042 | 712387 | 711338 | 753659 | 752610 | 2990184 | 2989135 | 1628180 | 1628905 | 1834124 | 1835173 | 2323480 | 2324529 | 686870  | 685821  |
| 1064 | BPSL0985 | 25a              | 718360 | 717431 | 595220 | 594291 | 598746 | 597817 | 713312 | 712383 | 754584 | 753655 | 2991109 | 2990180 | 1627255 | 1628184 | 1833199 | 1834128 | 2322555 | 2323484 | 687533  | 687411  |
| 1065 | BPSL0986 | 25a              | 718911 | 718357 | 595771 | 595217 | 599297 | 598743 | 713863 | 713309 | 755135 | 754581 | 2991660 | 2991106 | 1626704 | 1627258 | 1832648 | 1833202 | 2322004 | 2322558 | 688084  | 687530  |
| 1066 | BPSL0987 | 25a              | 719068 | 720525 | 595928 | 597385 | 599454 | 600911 | 714020 | 715477 | 755304 | 756761 | 2991799 | 2993256 | 1626547 | 1625090 | 1832485 | 1831028 | 2321841 | 2320384 | 688253  | 689710  |
| 1067 | BPSL0988 | 25a              | 720809 | 721222 | 597669 | 598082 | 601195 | 601608 | 715761 | 716174 | 757045 | 757458 | 2993540 | 2993953 | 1624806 | 1624393 | 1830744 | 1830331 | 2320100 | 2319687 | 689994  | 690365  |
| 1068 | BPSL0989 | 25a              | 721594 | 722214 | 598672 | 599322 | 602196 | 602816 | 716577 | 717197 | 757901 | 758521 | 2994325 | 2994945 | 1624021 | 1623401 | 1829959 | 1829339 | 2319315 | 2318695 | 690808  | 691428  |
| 1069 | BPSL0990 | 25a              | 722723 | 722340 | 599831 | 599448 | 603325 | 602942 | 717706 | 717323 | 759030 | 758647 | 2995454 | 2995071 | 1622892 | 1623275 | 1828830 | 1829213 | 2318186 | 2318569 | 691937  | 691554  |
| 1070 | BPSL0991 | 25a              | 723615 | 722779 | 600723 | 599887 | 604217 | 603381 | 718598 | 717762 | 759922 | 759086 | 2996346 | 2995510 | 1622000 | 1622836 | 1827938 | 1828774 | 2317294 | 2318130 | 692829  | 691993  |
| 1071 | BPSL0992 | 25a              | 725246 | 724374 | 602354 | 601482 | 605848 | 604976 | 720229 | 719357 | 761553 | 760681 | 2997969 | 2997970 | 1620377 | 1621249 | 1826307 | 1827179 | 2315666 | 2316538 | 694457  | 693585  |
| 1072 | BPSL0993 | 25a              | 725439 | 725254 | 602362 | 602362 | 606041 | 605856 | 720422 | 720237 | 761746 | 761561 | 2998162 | 2997977 | 1620184 | 1620369 | 1826114 | 1826299 | 2315473 | 2315658 | 694650  | 694465  |
| 1073 | BPSL0994 | 25a              | 725648 | 727462 | 602756 | 604570 | 606250 | 608064 | 720631 | 722445 | 761955 | 763769 | 2998371 | 3000185 | 1619975 | 1618161 | 1825905 | 1824091 | 2315264 | 2313450 | 694859  | 696673  |
| 1074 | BPSL0995 | 25a              | 727479 | 731594 | 604587 | 608702 | 608081 | 612196 | 722462 | 726577 | 763786 | 767901 | 3000202 | 3004317 | 1618144 | 1614029 | 1824074 | 1819959 | 2313433 | 2309318 | 696690  | 700805  |
| 1075 | BPSL0996 | 25a              | 731948 | 732655 | 609056 | 609763 | 612550 | 613257 | 726931 | 727638 | 768255 | 768962 | 3004671 | 3005378 | 1613675 | 1612968 | 1819605 | 1818898 | 2308964 | 2308257 | 701159  | 701866  |
| 1076 | BPSL0997 | 25a              | 732655 | 733665 | 609763 | 610773 | 613257 | 614267 | 727638 | 728648 | 768962 | 769972 | 3005378 | 3006388 | 1612968 | 1611958 | 1818898 | 1817888 | 2308257 | 2307247 | 701866  | 702876  |
| 1077 | BPSL0998 | 25a              | 736194 | 734020 | 613302 | 611128 | 616796 | 614622 | 731177 | 729003 | 772501 | 770327 | 3008917 | 3006743 | 1609429 | 1611603 | 1815359 | 1817533 | 2304718 | 2306892 | 705405  | 703231  |
| 1078 | BPSL0999 | 25a              | 737324 | 736680 | 614432 | 613788 | 617926 | 617282 | 732307 | 731663 | 773631 | 772987 | 3010047 | 3009403 | 1608299 | 1608943 | 1814229 | 1814873 | 2303588 | 2304232 | 706535  | 705891  |
| 1079 | BPSL1000 | 25a              | 737706 | 738791 | 614814 | 615899 | 618308 | 619393 | 732689 | 733774 | 774013 | 775098 | 3010429 | 3011514 | 1607917 | 1606832 | 1813847 | 1812762 | 2303206 | 2302121 | 706917  | 708002  |
| 1080 | BPSL1001 | 25a              | 738927 | 739463 | 616035 | 616571 | 619529 | 620065 | 733910 | 734446 | 775234 | 775770 | 3011650 | 3012186 | 1606696 | 1606160 | 1812626 | 1812090 | 2301985 | 2301449 | 708138  | 708674  |
| 1081 | BPSL1002 | 25a              | 739570 | 740136 | 616678 | 617244 | 620172 | 620738 | 734553 | 735119 | 775877 | 776443 | 3012293 | 3012859 | 1606053 | 1605487 | 1811983 | 1811417 | 2301342 | 2300776 | 708781  | 709347  |
| 1082 | BPSL1003 | 25a              | 740242 | 742518 | 617350 | 619626 | 620844 | 623120 | 735225 | 737501 | 776549 | 778825 | 3012965 | 3015241 | 1605381 | 1603105 | 1811311 | 1809035 | 2300670 | 2298394 | 709453  | 711729  |
| 1083 | BPSL1004 | 25a              | 742524 | 743243 | 619632 | 620351 | 623126 | 623845 | 737507 | 738214 | 778831 | 779550 | 3015247 | 3015966 | 1603099 | 1602380 | 1809029 | 1808310 | 2298388 | 2297669 | 711735  | 712454  |
| 1084 | BPSL1005 | 25a              | 744054 | 743383 | 621162 | 620491 | 624656 | 623985 | 739025 | 738354 | 780361 | 779690 | 3016777 | 3016106 | 1601569 | 1602240 | 1807499 | 1808170 | 2296858 | 2297529 | 713265  | 712594  |
| 1085 | BPSL1006 | 25a              | 745496 | 744090 | 622604 | 621198 | 626098 | 624692 | 740467 | 739061 | 781803 | 780397 | 3018219 | 3016813 | 1600127 | 1601533 | 1806057 | 1807463 | 2295416 | 2296822 | 714707  | 713301  |
| 1086 | BPSL1007 | 25a              | 747965 | 745668 | 625073 | 622776 | 628567 | 626270 | 742936 | 740639 | 784272 | 781975 | 3020688 | 3018391 | 1597658 | 1599955 | 1803588 | 1805885 | 2292947 | 2295244 | 717176  | 714879  |
| 1087 |          | Chr1_51_IS407A_B | 748097 | 749332 | 625205 | 626440 | 628699 | 629934 | 743068 | 744303 |        |        |         |         |         |         |         |         |         |         |         |         |
| 1088 | BPSL1008 | 25a              | 750619 | 749912 | 627727 | 627020 | 631221 | 630514 | 745590 | 744883 | 785686 | 784979 | 3022093 | 3021386 | 1596253 | 1596960 | 1802183 | 1802890 | 2291628 | 2292335 | 718597  | 717890  |
| 1089 | BPSL1009 | 25a              | 751145 | 750630 | 628253 | 627738 | 631747 | 631232 | 746116 | 745601 | 786212 | 785697 | 3022619 | 3022104 | 1595727 | 1596242 | 1801657 | 1802172 | 2291102 | 2291617 | 719123  | 718608  |
| 1090 | BPSL1010 | 25a              | 751540 | 752526 | 628648 | 629634 | 632142 | 633128 | 746511 | 747497 | 786607 | 787593 | 3023014 | 3024000 | 1595332 | 1594346 | 1801262 | 1800276 | 2290707 | 2289721 | 719518  | 720504  |
| 1091 | BPSL1011 | 25a              | 753517 | 752705 | 630625 | 629813 | 634119 | 633307 | 748488 | 747676 | 788584 | 787772 | 3024991 | 3024179 | 1593355 | 1594167 | 1799285 | 1800097 | 2288730 | 2289542 | 721495  | 720683  |
| 1092 | BPSL1012 | 25a              | 753682 | 754452 | 630790 | 631560 | 634284 | 635054 | 748653 | 749423 | 788749 | 789519 | 3025156 | 3025926 | 1593190 | 1592420 | 1799120 | 1798350 | 2288565 | 2287795 | 721660  | 722430  |
| 1093 |          | Chr1_52_IS8ma2_A | 754776 | 756348 | 631884 | 633456 | 635378 | 636950 | 749747 | 751319 | 789822 | 791394 | 3026236 | 3027808 | 1590531 | 1592103 | 1796447 | 1798019 | 2285906 | 2287478 | 722740  | 724312  |
| 1094 | BPSL1013 | 25a              | 759424 | 756443 | 636532 | 633551 | 640026 | 637045 | 754395 | 751414 | 794470 | 791489 | 3030884 | 3027903 | 1587455 | 1590436 | 1793371 | 1796352 | 2282830 | 2285811 | 727388  | 724407  |
| 1095 | BPSL1014 | 25a              | 759537 | 759713 | 636645 | 636821 | 640139 | 640315 | 754508 | 754684 | 794583 | 794759 | 3030997 | 3031173 | 1587342 | 1587166 | 1793258 | 1793082 | 2282717 | 2282541 | 727501  | 727677  |
| 1096 | BPSL1015 | 25a              | 759751 | 760737 | 636859 | 637845 | 640353 | 641339 | 754722 | 755708 | 794797 | 795783 | 3031211 | 3032197 | 1587128 | 1586142 | 1793044 | 1792058 | 2282503 | 2281517 | 727715  | 728701  |
| 1097 | BPSL1016 | 25a              | 760737 | 762716 | 637845 | 639824 | 641339 | 643318 | 755708 | 757687 | 795783 | 797762 | 3032197 | 3034176 | 1586142 | 1584163 | 1792058 | 1790079 | 2281517 | 2279538 | 728701  | 730680  |
| 1098 | BPSL1017 | 25a              | 762724 | 763911 | 639832 | 641019 | 643326 | 644513 | 757695 | 758882 | 797770 | 798957 | 3034184 | 3035371 | 1584155 | 1582968 | 1790071 | 1788884 | 2279530 | 2278343 | 730688  | 731875  |
| 1099 | BPSL1018 | 25a              | 765402 | 764098 | 642510 | 641206 | 646004 | 644700 | 760373 | 759069 | 800448 | 799144 | 3036862 | 3035558 | 1581477 | 1582781 | 1787393 | 1788697 | 2276852 | 2278156 | 733366  | 732062  |
| 1100 | BPSL1019 | 25a              | 766199 | 765444 | 643307 | 642552 | 646801 | 646046 | 761170 | 760415 | 801245 | 800490 | 3037659 | 3036904 | 1580680 | 1581435 | 1786596 | 1787351 | 2276055 | 2276810 | 734163  | 733408  |
| 1101 | BPSL1020 | 25a              | 767727 | 766291 | 644835 | 643399 | 648329 | 646893 | 762698 | 761262 | 802773 | 801337 | 3039187 | 3037751 | 1579152 | 1580588 | 1785068 | 1786504 | 2274527 | 2275963 | 735691  | 734255  |
| 1102 | BPSL1021 | 25a              | 767888 | 768412 | 644996 | 645520 | 648490 | 649014 | 762859 | 763383 | 802934 | 803458 | 3039348 | 3039872 | 1578991 | 1578467 | 1784907 | 1784383 | 2274366 | 2273842 | 735852  | 736376  |
| 1103 | BPSL1022 | 25a              |        |        |        |        |        |        |        |        | 804479 | 803838 | 3040938 | 3040297 | 1577437 | 1578078 |         |         |         |         |         |         |
| 1104 | BPSL1023 | 25a              |        |        |        |        | 650269 | 650595 |        |        |        |        |         |         |         |         | 1783128 | 1782799 |         |         | 737640  | 737963  |
| 1105 | BPSL1025 | 25a              | 771548 | 770373 | 648691 | 647516 | 652899 | 651724 | 766533 | 765358 | 806600 | 805425 | 3043105 | 3041930 | 1575259 | 1576434 | 1781168 | 1782343 | 2270699 | 2271874 | 1804039 | 1805214 |
| 1106 | BPSL1026 | 25a              | 771639 | 773366 | 648782 | 650509 | 652990 | 654717 | 766624 | 768    |        |        |         |         |         |         |         |         |         |         |         |         |





|      |                   |    |         |         |         |         |         |         |         |         |         |         |         |         |         |         |         |         |         |         |         |         |
|------|-------------------|----|---------|---------|---------|---------|---------|---------|---------|---------|---------|---------|---------|---------|---------|---------|---------|---------|---------|---------|---------|---------|
| 1160 | BPSL1074          | 27 | 2299375 | 2298416 | 2192134 | 2191175 | 2207594 | 2206635 | 2287444 | 2286485 | 2442385 | 2443344 | 2578100 | 2577141 | 2043862 | 2044821 | 2249527 | 2250486 | 716953  | 715994  | 2266120 | 2267079 |
| 1161 | BPSL1075          | 27 | 2299591 | 2300901 | 2192350 | 2193660 | 2207810 | 2209120 | 2287660 | 2288970 | 2442169 | 2440859 | 2578316 | 2579626 | 2043646 | 2042336 | 2249311 | 2248001 | 717169  | 718479  | 2265904 | 2264594 |
| 1162 | BPSL1076          | 27 | 2300906 | 2302165 | 2193665 | 2194924 | 2209125 | 2210384 | 2288975 | 2290234 | 2440854 | 2439595 | 2579631 | 2580890 | 2042331 | 2041072 | 2247996 | 2246737 | 718484  | 719743  | 2264589 | 2263330 |
| 1163 | BPSL1078          | 27 | 2302479 | 2303498 | 2195238 | 2196257 | 2210698 | 2211717 | 2290548 | 2291567 | 2439295 | 2438276 | 2581204 | 2582223 | 2040758 | 2039739 | 2246423 | 2245404 | 720057  | 721076  | 2263016 | 2261997 |
| 1164 | BPSL1079          | 27 | 2305018 | 2303828 | 2197777 | 2196587 | 2213237 | 2212047 | 2293087 | 2291897 | 2436764 | 2437954 | 2583871 | 2582681 | 2038075 | 2039265 | 2243724 | 2244914 | 722580  | 721390  | 2260493 | 2261683 |
| 1165 | BPSL1080          | 27 | 2307525 | 2305168 | 2200284 | 2197927 | 2215744 | 2213387 | 2295620 | 2295012 | 2434257 | 2436614 | 2586378 | 2584021 | 2035568 | 2037925 | 2241217 | 2243574 | 725087  | 722730  | 2257986 | 2260343 |
| 1166 | BPSL1081          | 27 | 2308653 | 2307757 | 2201412 | 2200516 | 2216872 | 2215976 | 2296748 | 2295852 | 2433129 | 2434025 | 2587506 | 2586610 | 2034440 | 2035336 | 2240089 | 2240985 | 726215  | 725319  | 2256858 | 2257754 |
| 1167 | BPSL1082          | 27 | 2309125 | 2308661 | 2201884 | 2201420 | 2217344 | 2216880 | 2297220 | 2296756 | 2432657 | 2433121 | 2587978 | 2587514 | 2033968 | 2034432 | 2239617 | 2240081 | 726687  | 726223  | 2256386 | 2256850 |
| 1168 | Chr1_58a_IS407A_A |    | 2309174 | 2310409 | 2201933 | 2203168 | 2217393 | 2218628 | 2297269 | 2298504 | 2431373 | 2432608 | 2588026 | 2589261 | 2032685 | 2033920 | 2238334 | 2239569 | 726736  | 727971  | 2255102 | 2256337 |
| 1169 | Chr1_58b_IS407A_A |    | 2051541 | 2052776 | 1944299 | 1945534 | 1959751 | 1960986 | 2039586 | 2040821 | 2200925 | 2202160 | 889050  | 890285  | 270634  | 271869  | 403287  | 404522  | 954151  | 955386  | 1994927 | 1996162 |
| 1170 | BPSL1083          | 28 | 2050338 | 2051537 | 1943096 | 1944295 | 1958548 | 1959747 | 2038383 | 2039582 | 2199710 | 2200909 | 887847  | 889046  | 273072  | 271873  | 405725  | 404526  | 983324  | 982125  | 1993724 | 1994923 |
| 1171 | BPSL1084          | 28 | 2049390 | 2050295 | 1942148 | 1943053 | 1957600 | 1958505 | 2037435 | 2038340 | 2198762 | 2199667 | 886899  | 887804  | 274020  | 273115  | 406673  | 405768  | 984272  | 983367  | 1992776 | 1993681 |
| 1172 | BPSL1085          | 28 | 2048606 | 2049286 | 1941364 | 1942044 | 1956816 | 1957496 | 2036651 | 2037331 | 2197978 | 2198658 | 886115  | 886795  | 274804  | 274124  | 407457  | 406777  | 985056  | 984376  | 1991992 | 1992672 |
| 1173 | BPSL1086          | 28 | 2048470 | 2047004 | 1941228 | 1939762 | 1956680 | 1955214 | 2036515 | 2035049 | 2197842 | 2196376 | 885979  | 884513  | 274940  | 276406  | 407593  | 409059  | 985192  | 986658  | 1991856 | 1990390 |
| 1174 | BPSL1087          | 28 | 2046865 | 2044970 | 1939623 | 1937728 | 1955075 | 1953180 | 2034910 | 2033015 | 2196237 | 2194342 | 884374  | 882479  | 276545  | 278440  | 409198  | 411093  | 986797  | 988692  | 1990251 | 1988356 |
| 1175 | BPSL1088          | 28 | 2044958 | 2044368 | 1937716 | 1937126 | 1953168 | 1952578 | 2033003 | 2032413 | 2194330 | 2193740 | 882467  | 881877  | 278452  | 279042  | 411105  | 411695  | 988704  | 989294  | 1988344 | 1987754 |
| 1176 | BPSL1089          | 28 | 2044368 | 2043892 | 1937126 | 1936650 | 1952578 | 1952102 | 2032413 | 2031937 | 2193740 | 2193264 | 881877  | 881401  | 279042  | 279518  | 411695  | 412171  | 989294  | 989770  | 1987754 | 1987278 |
| 1177 | BPSL1091          | 28 | 2043638 | 2042712 | 1936396 | 1935470 | 1951848 | 1950922 | 2031683 | 2030757 | 2193010 | 2192084 | 881147  | 880221  | 279772  | 280698  | 412425  | 413351  | 990024  | 990950  | 1987024 | 1986098 |
| 1178 | BPSL1092          | 28 | 2042517 | 2042281 | 1935275 | 1935039 | 1950727 | 1950491 | 2030562 | 2030326 | 2191889 | 2191653 | 880026  | 879790  | 280893  | 281129  | 413546  | 413782  | 991145  | 991381  | 1985903 | 1985667 |
| 1179 | BPSL1093          | 28 | 2042281 | 2040734 | 1935039 | 1933492 | 1950491 | 1948944 | 2030326 | 2028779 | 2191653 | 2190106 | 879790  | 878243  | 281129  | 282676  | 413782  | 415329  | 991381  | 992928  | 1985667 | 1984120 |
| 1180 | BPSL1094          | 28 | 2040171 | 2040602 | 1932929 | 1933360 | 1948381 | 1948812 | 2028216 | 2028647 | 2189543 | 2189974 | 877680  | 878111  | 283239  | 282808  | 415892  | 415461  | 993491  | 993600  | 1983557 | 1983988 |
| 1181 | BPSL1095          | 28 | 2038852 | 2039802 | 1931610 | 1932560 | 1947062 | 1948012 | 2026897 | 2027847 | 2188224 | 2189174 | 876361  | 877311  | 284558  | 283608  | 417211  | 416261  | 994810  | 993860  | 1982238 | 1983188 |
| 1182 | BPSL1096          | 28 | 2037233 | 2038447 | 1929991 | 1931205 | 1945443 | 1946657 | 2025278 | 2026492 | 2186605 | 2187819 | 874742  | 875956  | 286177  | 284963  | 418830  | 417616  | 996429  | 995215  | 1980619 | 1981833 |
| 1183 | BPSL1097          | 28 | 2035974 | 2037146 | 1928732 | 1929904 | 1944184 | 1945356 | 2024019 | 2025191 | 2185346 | 2186518 | 873483  | 874655  | 287436  | 286264  | 420089  | 418917  | 997688  | 996516  | 1979360 | 1980532 |
| 1184 | BPSL1098          | 28 | 2034919 | 2035758 | 1927677 | 1928516 | 1943129 | 1943968 | 2022964 | 2023803 | 2184291 | 2185130 | 872428  | 873267  | 288491  | 287652  | 421144  | 420305  | 998743  | 997904  | 1978305 | 1979144 |
| 1185 | BPSL1099          | 28 | 2034685 | 2034329 | 1927443 | 1927087 | 1942895 | 1942539 | 2022730 | 2022374 | 2184057 | 2183701 | 872194  | 871838  | 288725  | 289081  | 421378  | 421734  | 998977  | 999333  | 1978701 | 1977715 |
| 1186 | BPSL1100          | 28 | 2034285 | 2033920 | 1927043 | 1926678 | 1942495 | 1942130 | 2022330 | 2021965 | 2183657 | 2183292 | 871794  | 871429  | 289125  | 289490  | 421778  | 422143  | 999377  | 999742  | 1977671 | 1977306 |
| 1187 | Chr1_59_ISBma1_A  |    | 2032534 | 2033838 | 1925292 | 1926596 | 1940744 | 1942048 | 2020579 | 2021883 | 2181906 | 2183210 | 870043  | 871347  | 289572  | 290876  | 422225  | 423530  | 999824  | 1001128 | 1975920 | 1977224 |
| 1188 | BPSL1101          | 28 | 2031561 | 2032109 | 1924319 | 1924867 | 1939771 | 1940319 | 2019606 | 2020154 | 2180933 | 2181481 | 869069  | 869617  | 291850  | 291302  | 424504  | 423956  | 1002101 | 1001553 | 1974947 | 1975495 |
| 1189 | BPSL1102          | 28 | 2031123 | 2030056 | 1923881 | 1922814 | 1939333 | 1938266 | 2019168 | 2018101 | 2180471 | 2179404 | 868631  | 867564  | 292296  | 293363  | 424934  | 426001  | 1002555 | 1003622 | 1974453 | 1973386 |
| 1190 | BPSL1103          | 28 | 2029276 | 2029917 | 1922034 | 1922675 | 1937486 | 1938127 | 2017321 | 2017962 | 2178624 | 2179265 | 866784  | 867425  | 294143  | 293502  | 426781  | 426140  | 1004402 | 1003761 | 1972606 | 1973247 |
| 1191 | BPSL1104          | 28 | 2028399 | 2029268 | 1920413 | 1920901 | 1936609 | 1937478 | 2016444 | 2017313 | 2177747 | 2178616 | 865907  | 866776  | 295020  | 294151  | 427658  | 426789  | 1005279 | 1004410 | 1971729 | 1972598 |
| 1192 | BPSL1105          | 28 | 2028141 | 2027512 | 1920155 | 1919526 | 1936351 | 1935722 | 2016186 | 2015557 | 2177489 | 2176860 | 865649  | 865020  | 295278  | 295907  | 427916  | 428545  | 1005537 | 1006166 | 1971471 | 1970842 |
| 1193 | BPSL1106          | 28 | 2025900 | 2027363 | 1917914 | 1919377 | 1934110 | 1935573 | 2013945 | 2015408 | 2175248 | 2176711 | 863408  | 864871  | 297519  | 296056  | 430157  | 428694  | 1007778 | 1006315 | 1969230 | 1970693 |
| 1194 | BPSL1107          | 28 | 2023848 | 2025677 | 1915862 | 1917691 | 1932058 | 1933887 | 2011893 | 2013722 | 2173196 | 2175025 | 861356  | 863185  | 299571  | 297742  | 432209  | 430380  | 1009830 | 1008001 | 1967178 | 1969007 |
| 1195 | BPSL1108          | 28 | 2023671 | 2022439 | 1915685 | 1914453 | 1931881 | 1930649 | 2011716 | 2010484 | 2173019 | 2171787 | 861179  | 859947  | 299748  | 300980  | 432386  | 433618  | 1010007 | 1011239 | 1967001 | 1965769 |
| 1196 | BPSL1109          | 28 |         |         | 1908431 | 1909048 | 1924435 | 1925031 |         |         |         |         |         |         |         |         |         |         |         |         | 1960513 | 1961052 |
| 1197 | BPSL1110          | 28 | 2016209 | 2016727 | 1907738 | 1908256 | 1923742 | 1924260 | 2004254 | 2004772 | 2165575 | 2166093 | 853693  | 854211  | 307198  | 306680  | 439836  | 439318  | 1017481 | 1016963 | 1959820 | 1960338 |
| 1198 | BPSL1111          | 28 | 2015440 | 2014229 | 1906969 | 1905758 | 1922973 | 1921762 | 2003485 | 2002274 | 2164806 | 2163595 | 852924  | 851713  | 307967  | 309178  | 440605  | 441816  | 1018250 | 1019461 | 1959051 | 1957840 |
| 1199 | BPSL1112          | 28 | 2014133 | 2013915 | 1905662 | 1905444 | 1921666 | 1921448 | 2002178 | 2001960 | 2163499 | 2163281 | 851617  | 851399  | 309274  | 309492  | 441912  | 442130  | 1019557 | 1019775 | 1957744 | 1957526 |
| 1200 | BPSL1113          | 28 | 2013853 | 2013470 | 1905382 | 1904999 | 1921386 | 1921003 | 2001898 | 2001515 | 2163219 | 2162836 | 851337  | 850954  | 309554  | 309937  | 442192  | 442575  | 1019837 | 1020220 | 1957464 | 1957081 |
| 1201 | BPSL1114          | 28 | 2012841 | 2011396 | 1904370 | 1902925 | 1920374 | 1918929 | 2000886 | 1999441 | 2162207 | 2160762 | 850325  | 848880  | 310566  | 312011  | 443204  | 444649  | 1020859 | 1022304 | 1956432 | 1955017 |
| 1202 | BPSL1115          | 28 | 2009970 | 2010860 | 1901305 | 1902195 | 1916745 | 1917635 | 1998000 | 1998890 | 2159248 | 2160138 | 847462  | 848352  | 313437  | 312547  | 446150  | 445260  | 1023722 | 1022832 | 1953584 | 1954474 |
| 1203 | BPSL1116          | 28 | 2009027 | 2009923 | 1900362 | 1901258 | 1915802 | 1916698 | 1997057 | 1997953 | 2158305 | 2159201 | 846519  | 847415  | 314380  | 313484  | 447093  | 446197  | 1024665 | 1023769 | 1952641 | 1953537 |
| 1204 | BPSL1117          | 28 | 2008405 | 2004884 | 1899740 | 1896219 | 1915180 | 1911659 | 1996435 | 1992914 | 2157683 | 2154162 | 845897  | 842376  | 315002  | 318523  | 447715  | 451236  | 1025287 | 1028808 | 1952019 | 1948498 |
| 1205 | BPSL1118          | 28 | 2004841 | 2003054 | 1896176 | 1894389 | 1911616 | 1909829 | 1992871 | 1991084 | 2154119 | 2152332 | 842333  | 840546  | 318566  | 320353  | 451279  | 453066  | 1028851 | 1030638 | 1948455 | 1946668 |
| 1206 | BPSL1119          | 28 | 2002997 | 2001918 | 1894332 | 1893253 | 1909772 | 1908693 | 1991027 | 1989948 | 2152275 | 2151196 | 840489  | 839410  | 320410  | 321489  | 453123  | 454     |         |         |         |         |

|      |           |     |         |         |         |         |         |         |         |         |         |         |        |        |        |        |        |        |         |         |         |         |
|------|-----------|-----|---------|---------|---------|---------|---------|---------|---------|---------|---------|---------|--------|--------|--------|--------|--------|--------|---------|---------|---------|---------|
| 1211 | BPSL1124  | 28  | 1995644 | 1996405 | 1886979 | 1887740 | 1902419 | 1903180 | 1983674 | 1984435 | 2144922 | 2145683 | 833136 | 833897 | 327763 | 327002 | 460476 | 459715 | 1038048 | 1037287 | 1939258 | 1940019 |
| 1212 | BPSL1125  | 28  | 1995186 | 1994809 | 1886521 | 1886144 | 1901961 | 1901584 | 1983216 | 1982839 | 2144464 | 2144087 | 832678 | 832301 | 328221 | 328598 | 460934 | 461311 | 1038506 | 1038883 | 1938800 | 1938423 |
| 1213 | BPSL1126  | 28  | 1993932 | 1994522 | 1885267 | 1885857 | 1900707 | 1901297 | 1981962 | 1982552 | 2143210 | 2143800 | 831424 | 832014 | 329475 | 328885 | 462188 | 461598 | 1039760 | 1039170 | 1937546 | 1938136 |
| 1214 | BPSL1127  | 28  | 1992426 | 1993670 | 1883761 | 1885005 | 1899201 | 1900445 | 1980456 | 1981700 | 2141704 | 2142948 | 829918 | 831162 | 330981 | 329737 | 463694 | 462450 | 1041266 | 1040022 | 1936040 | 1937284 |
| 1215 | BPSL1128  | 28  | 1991446 | 1992426 | 1882563 | 1882727 | 1898500 | 1899201 | 1979476 | 1980456 | 2140724 | 2141704 | 828938 | 829918 | 331961 | 330981 | 464674 | 463694 | 1042246 | 1041266 | 1935060 | 1936040 |
| 1216 | BPSL1129  | 28  | 1990314 | 1990763 | 1881431 | 1881880 | 1896585 | 1897034 | 1978344 | 1978793 | 2139592 | 2140041 | 827806 | 828255 | 333093 | 332644 | 465806 | 465357 | 1043378 | 1042929 | 1933928 | 1934377 |
| 1217 | BPSL1130  | 28  | 1988927 | 1989817 | 1880044 | 1880934 | 1895198 | 1896088 | 1976957 | 1977847 | 2138205 | 2139095 | 826419 | 827309 | 334480 | 333590 | 467193 | 466303 | 1044765 | 1043875 | 1932541 | 1933431 |
| 1218 | BPSL1131  | 28  | 1988316 | 1988747 | 1879433 | 1879864 | 1894587 | 1895018 | 1976346 | 1976777 | 2137594 | 2138025 | 825808 | 826239 | 335091 | 334660 | 467804 | 467373 | 1045376 | 1044945 | 1931930 | 1932361 |
| 1219 | BPSL1132  | 28  | 1987887 | 1988177 | 1879004 | 1879294 | 1894158 | 1894448 | 1975917 | 1976207 | 2137165 | 2137455 | 825379 | 825669 | 335520 | 335230 | 468233 | 467943 | 1045805 | 1045515 | 1931501 | 1931791 |
| 1220 | BPSL1133  | 28  | 1987199 | 1986849 | 1878316 | 1877966 | 1893470 | 1893120 | 1975229 | 1974879 | 2136477 | 2136127 | 824691 | 824341 | 336208 | 336558 | 468921 | 469271 | 1046493 | 1046843 | 1930813 | 1930463 |
| 1221 | BPSL1134  | 28  | 1985667 | 1984990 | 1876784 | 1876107 | 1891938 | 1891261 | 1973697 | 1973020 | 2134945 | 2134268 | 823159 | 822482 | 337740 | 338417 | 470453 | 471130 | 1048025 | 1048702 | 1929281 | 1928604 |
| 1222 | BPSL1135  | 28  | 1984925 | 1983531 | 1876042 | 1874648 | 1891196 | 1889802 | 1972955 | 1971561 | 2134203 | 2132809 | 822417 | 821023 | 338482 | 339876 | 471195 | 472589 | 1048767 | 1050161 | 1928539 | 1927145 |
| 1223 | BPSL1136  | 28  | 1982112 | 1983497 | 1873229 | 1874614 | 1888383 | 1889768 | 1970142 | 1971527 | 2131390 | 2132775 | 819604 | 820989 | 341295 | 339910 | 474008 | 472623 | 1051580 | 1050195 | 1925726 | 1927111 |
| 1224 | BPSL1137  | GI6 |         |         |         |         |         |         |         |         |         |         |        |        |        |        |        |        |         |         |         |         |
| 1225 | BPSL1138  | GI6 |         |         |         |         |         |         |         |         |         |         |        |        |        |        |        |        |         |         |         |         |
| 1226 | BPSL1139  | GI6 |         |         |         |         |         |         |         |         |         |         |        |        |        |        |        |        |         |         |         |         |
| 1227 | BPSL1140  | GI6 |         |         |         |         |         |         |         |         |         |         |        |        |        |        |        |        |         |         |         |         |
| 1228 | BPSL1141  | GI6 |         |         |         |         |         |         |         |         |         |         |        |        |        |        |        |        |         |         |         |         |
| 1229 | BPSL1142  | GI6 |         |         |         |         |         |         |         |         |         |         |        |        |        |        |        |        |         |         |         |         |
| 1230 | BPSL1143  | GI6 |         |         |         |         |         |         |         |         |         |         |        |        |        |        |        |        |         |         |         |         |
| 1231 | BPSL1144  | GI6 |         |         |         |         |         |         |         |         |         |         |        |        |        |        |        |        |         |         |         |         |
| 1232 | BPSL1145  | GI6 |         |         |         |         |         |         |         |         |         |         |        |        |        |        |        |        |         |         |         |         |
| 1233 | BPSL1146  | GI6 |         |         |         |         |         |         |         |         |         |         |        |        |        |        |        |        |         |         |         |         |
| 1234 | BPSL1147  | GI6 |         |         |         |         |         |         |         |         |         |         |        |        |        |        |        |        |         |         |         |         |
| 1235 | BPSL1148  | GI6 |         |         |         |         |         |         |         |         |         |         |        |        |        |        |        |        |         |         |         |         |
| 1236 | BPSL1149  | GI6 |         |         |         |         |         |         |         |         |         |         |        |        |        |        |        |        |         |         |         |         |
| 1237 | BPSL1150  | GI6 |         |         |         |         |         |         |         |         |         |         |        |        |        |        |        |        |         |         |         |         |
| 1238 | BPSL1151  | GI6 |         |         |         |         |         |         |         |         |         |         |        |        |        |        |        |        |         |         |         |         |
| 1239 | BPSL1152  | GI6 |         |         |         |         |         |         |         |         |         |         |        |        |        |        |        |        |         |         |         |         |
| 1240 | BPSL1153  | GI6 |         |         |         |         |         |         |         |         |         |         |        |        |        |        |        |        |         |         |         |         |
| 1241 | BPSL1153A | GI6 |         |         |         |         |         |         |         |         |         |         |        |        |        |        |        |        |         |         |         |         |
| 1242 | BPSL1154  | GI6 |         |         |         |         |         |         |         |         |         |         |        |        |        |        |        |        |         |         |         |         |
| 1243 | BPSL1155  | GI6 |         |         |         |         |         |         |         |         |         |         |        |        |        |        |        |        |         |         |         |         |
| 1244 | BPSL1156  | GI6 |         |         |         |         |         |         |         |         |         |         |        |        |        |        |        |        |         |         |         |         |
| 1245 | BPSL1157  | GI6 |         |         |         |         |         |         |         |         |         |         |        |        |        |        |        |        |         |         |         |         |
| 1246 | BPSL1158  | 28  | 1980328 | 1981791 | 1871445 | 1872908 | 1886599 | 1888062 | 1968358 | 1969821 | 2129606 | 2131069 | 817820 | 819283 | 343079 | 341616 | 475792 | 474329 | 1053364 | 1051901 | 1923942 | 1925405 |
| 1247 | BPSL1159  | 28  | 1979690 | 1980316 | 1870807 | 1871433 | 1885961 | 1886587 | 1967720 | 1968346 | 2128968 | 2129594 | 817182 | 817808 | 343717 | 343091 | 476430 | 475804 | 1054002 | 1053376 | 1923304 | 1923930 |
| 1248 | BPSL1160  | 28  | 1979167 | 1979634 | 1870284 | 1870751 | 1885438 | 1885905 | 1967197 | 1967664 | 2128445 | 2128912 | 816659 | 817126 | 344240 | 343773 | 476953 | 476486 | 1054525 | 1054058 | 1922781 | 1923248 |
| 1249 | BPSL1161  | 28  | 1978646 | 1979107 | 1869763 | 1870224 | 1884917 | 1885378 | 1966676 | 1967137 | 2127924 | 2128385 | 816138 | 816599 | 344761 | 344300 | 477474 | 477013 | 1055046 | 1054585 | 1922260 | 1922721 |
| 1250 | BPSL1162  | 28  | 1977889 | 1978638 | 1869006 | 1869755 | 1884160 | 1884909 | 1965919 | 1966668 | 2127167 | 2127916 | 815381 | 816130 | 345518 | 344769 | 478231 | 477482 | 1055803 | 1055054 | 1921503 | 1922252 |
| 1251 | BPSL1163  | 28  | 1976969 | 1977889 | 1868086 | 1869006 | 1883240 | 1884160 | 1964999 | 1965919 | 2126247 | 2127167 | 814461 | 815381 | 346438 | 345518 | 479151 | 478231 | 1056723 | 1055803 | 1920583 | 1921503 |
| 1252 | BPSL1164  | 28  | 1975561 | 1976835 | 1866678 | 1867952 | 1881832 | 1883106 | 1963591 | 1964865 | 2124839 | 2126113 | 813053 | 814327 | 347846 | 346572 | 480559 | 479285 | 1058131 | 1056857 | 1919175 | 1920449 |
| 1253 | BPSL1165  | 28  | 1974722 | 1975447 | 1865839 | 1866564 | 1881182 | 1881718 | 1962752 | 1963477 | 2124000 | 2124725 | 812214 | 812939 | 348685 | 347960 | 481398 | 480673 | 1058970 | 1058245 | 1918336 | 1919061 |
| 1254 | BPSL1166  | 28  | 1973577 | 1974224 | 1864358 | 1865005 | 1879089 | 1879736 | 1961626 | 1962273 | 2122855 | 2123502 | 811097 | 811744 | 349921 | 349274 | 482543 | 481896 | 1060122 | 1059475 | 1917233 | 1917880 |
| 1255 | BPSL1167  | 28  | 1973319 | 1972543 | 1864100 | 1863324 | 1878831 | 1878055 | 1961368 | 1960592 | 2122597 | 2121821 | 810839 | 810063 | 350179 | 350955 | 482801 | 483577 | 1060380 | 1061156 | 1916975 | 1916199 |
| 1256 | BPSL1168  | 28  | 1972302 | 1971913 | 1863083 | 1862694 | 1877814 | 1877425 | 1960351 | 1959962 | 2121580 | 2121191 | 809822 | 809433 | 351196 | 351585 | 483818 | 484207 | 1061397 | 1061786 | 1915958 | 1915569 |
| 1257 | BPSL1169  | 28  | 1971087 | 1970116 | 1861868 | 1860897 | 1876599 | 1875628 | 1959136 | 1958165 | 2120357 | 2119386 | 808599 | 807628 | 352419 | 353390 | 485049 | 486020 | 1062620 | 1063591 | 1914735 | 1913764 |
| 1258 | BPSL1170  | 28  | 1969648 | 1969559 | 1860429 | 1860340 | 1875160 | 1875071 | 1957697 | 1957608 | 2118918 | 2118829 | 807160 | 807071 | 353858 | 353947 | 486488 | 486577 | 1064059 | 1064148 | 1913296 | 1913207 |
| 1259 | BPSL1171  | 28  | 1969559 | 1967754 | 1860340 | 1858535 | 1875071 | 1873266 | 1957608 | 1955803 | 2118829 | 2117024 | 807071 | 805266 | 353947 | 355752 | 486577 | 488382 | 1064148 | 1065953 | 1913207 | 1911402 |
| 1260 | BPSL1172  | 28  | 1967655 | 1965598 | 1858436 | 1856379 | 1873167 | 1871110 | 1955704 | 1953647 | 2116925 | 2114868 | 805167 | 803110 | 355851 | 357899 | 488481 | 490538 | 1066052 | 1068109 | 1911303 | 1909246 |
| 1261 | BPSL1173  | 28  | 1965582 | 1965004 | 1856363 | 1855785 | 1871094 | 1870516 | 1953631 | 1953053 | 2114852 | 2114274 | 803094 | 802516 | 357915 | 358493 | 490554 | 491132 | 1068125 | 1068703 | 1909230 | 1908652 |



|               |    |         |         |         |         |         |         |         |         |         |         |        |        |        |        |        |        |         |         |         |         |
|---------------|----|---------|---------|---------|---------|---------|---------|---------|---------|---------|---------|--------|--------|--------|--------|--------|--------|---------|---------|---------|---------|
| 1262 BPSL1174 | 28 | 1964715 | 1964572 | 1855496 | 1855353 | 1870227 | 1870084 | 1952764 | 1952621 | 2113985 | 2113842 | 802227 | 802084 | 358782 | 358925 | 491421 | 491564 | 1068992 | 1069135 | 1908363 | 1908220 |
| 1263 BPSL1175 | 28 | 1961743 | 1961048 | 1852523 | 1851828 | 1867255 | 1866560 | 1949781 | 1949086 | 2111013 | 2110318 | 799255 | 798560 | 361754 | 362449 | 494393 | 495088 | 1071964 | 1072659 | 1905391 | 1904666 |
| 1264 BPSL1176 | 28 | 1960663 | 1960370 | 1851443 | 1851150 | 1866175 | 1865882 | 1948701 | 1948408 | 2109933 | 2109640 | 798175 | 797882 | 362834 | 363127 | 495473 | 495766 | 1073004 | 1073337 | 1904311 | 1904018 |
| 1265 BPSL1177 | 28 | 1960151 | 1959834 | 1850931 | 1850614 | 1865663 | 1865346 | 1948189 | 1947872 | 2109421 | 2109104 | 797663 | 797346 | 363346 | 363663 | 495985 | 496302 | 1073556 | 1073873 | 1903799 | 1903482 |
| 1266 BPSL1178 | 28 | 1959639 | 1959025 | 1850419 | 1849805 | 1865151 | 1864537 | 1947677 | 1947063 | 2108909 | 2108295 | 797151 | 796537 | 363858 | 364472 | 496497 | 497111 | 1074068 | 1074682 | 1903287 | 1902673 |
| 1267 BPSL1179 | 28 | 1958761 | 1958282 | 1849541 | 1849062 | 1864273 | 1863794 | 1946799 | 1946320 | 2108031 | 2107552 | 796273 | 795794 | 364736 | 365215 | 497375 | 497854 | 1074946 | 1075425 | 1902409 | 1901930 |
| 1268 BPSL1180 | 28 | 1956392 | 1955949 | 1847172 | 1846729 | 1861904 | 1861461 | 1944430 | 1943987 | 2105662 | 2105219 | 793904 | 793461 | 367105 | 367548 | 499744 | 500187 | 1077315 | 1077758 | 1900040 | 1899597 |
| 1269 BPSL1181 | 28 | 1955835 | 1955107 | 1846615 | 1845887 | 1861347 | 1860619 | 1943873 | 1943145 | 2105105 | 2104377 | 793347 | 792619 | 367662 | 368390 | 500301 | 501029 | 1077872 | 1078600 | 1899483 | 1898755 |
| 1270 BPSL1182 | 28 | 1955107 | 1954469 | 1845887 | 1845249 | 1860619 | 1859981 | 1943145 | 1942507 | 2104377 | 2103739 | 792619 | 791981 | 368390 | 369028 | 501029 | 501667 | 1078600 | 1079238 | 1898755 | 1898228 |
| 1271 BPSL1183 | 28 | 1954122 | 1952731 | 1844902 | 1843511 | 1859634 | 1858243 | 1942160 | 1940769 | 2103392 | 2102001 | 791634 | 790243 | 369375 | 370766 |        |        | 1079585 | 1080976 | 1898105 | 1896714 |
| 1272          | 28 | 1951374 | 1952678 | 1842154 | 1843458 | 1856886 | 1858190 | 1939412 | 1940716 | 2100644 | 2101948 | 788886 | 790190 | 370819 | 372123 | 502009 | 502817 | 1081029 | 1082333 | 1895357 | 1896661 |
| 1273 BPSL1184 | 28 | 1951158 | 1949845 | 1841938 | 1840625 | 1856670 | 1855357 | 1939196 | 1937883 | 2100443 | 2099133 | 788679 | 787366 | 372330 | 373643 | 503024 | 504337 | 1082540 | 1083853 | 1895150 | 1893837 |
| 1274 BPSL1185 | 28 | 1947612 | 1949516 | 1838392 | 1840296 | 1853124 | 1855028 | 1935650 | 1937554 | 2096900 | 2098804 | 785133 | 787037 | 375876 | 373972 | 506570 | 504666 | 1086086 | 1084182 | 1891604 | 1893508 |
| 1275 BPSL1186 | 28 | 1946282 | 1947094 | 1837062 | 1837874 | 1851794 | 1852606 | 1934320 | 1935132 | 2095577 | 2096389 | 783754 | 784566 | 377220 | 376408 | 507914 | 507102 | 1087423 | 1086611 | 1890225 | 1891037 |
| 1276 BPSL1187 | 28 | 1945334 | 1945918 | 1836214 | 1836698 | 1850846 | 1851430 | 1933372 | 1933956 | 2094629 | 2095213 | 782806 | 783390 | 38168  | 377584 | 508862 | 508278 | 1088371 | 1087787 | 1889277 | 1889597 |
| 1277 BPSL1188 | 28 | 1944618 | 1945334 | 1835398 | 1836114 | 1850130 | 1850846 | 1932656 | 1933372 | 2093913 | 2094629 | 782090 | 782806 | 378884 | 378168 | 509578 | 508862 | 1089087 | 1088371 | 1888561 | 1889277 |
| 1278 BPSL1189 | 28 | 1943911 | 1944378 | 1834691 | 1835158 | 1849423 | 1849890 | 1931949 | 1932416 | 2093206 | 2093673 | 781383 | 781850 | 379591 | 379124 | 510285 | 509818 | 1089794 | 1089327 | 1887854 | 1888321 |
| 1279 BPSL1190 | 28 | 1942793 | 1943824 | 1833573 | 1834604 | 1848305 | 1849336 | 1930831 | 1931862 | 2092088 | 2093119 | 780265 | 781296 | 380709 | 379678 | 511403 | 510372 | 1090912 | 1090981 | 1886736 | 1887762 |
| 1280 BPSL1191 | 28 | 1941833 | 1942768 | 1832613 | 1833548 | 1847345 | 1848280 | 1929871 | 1930806 | 2089813 | 2090313 | 779305 | 780240 | 381669 | 380734 | 512363 | 511428 | 1091872 | 1090937 | 1885776 | 1886711 |
| 1281 BPSL1192 | 28 | 1941275 | 1941739 | 1832055 | 1832519 | 1846787 | 1847251 | 1929313 | 1929777 | 2089255 | 2089719 | 778747 | 779211 | 382227 | 381763 | 512921 | 512457 | 1092430 | 1091966 | 1885218 | 1885682 |
| 1282 BPSL1193 | 28 | 1940471 | 1941223 | 1831251 | 1832003 | 1845983 | 1846735 | 1928509 | 1929261 | 2088451 | 2089203 | 777943 | 778695 | 383031 | 382279 | 513725 | 512973 | 1093234 | 1092482 | 1884414 | 1885166 |
| 1283 BPSL1194 | 28 | 1940018 | 1940437 | 1830798 | 1831217 | 1845620 | 1845949 | 1928056 | 1928475 | 2087998 | 2088417 | 777490 | 777909 | 383484 | 383065 | 514178 | 513759 | 1093687 | 1093268 | 1883961 | 1884380 |
| 1284 BPSL1195 | 28 | 1939461 | 1940018 | 1830798 | 1831217 | 1844347 | 1844895 | 1927499 | 1928056 | 2087441 | 2087998 | 776933 | 777490 | 384041 | 383484 | 514735 | 514178 | 1094244 | 1093687 | 1883404 | 1883961 |
| 1285 BPSL1196 | 28 | 1939065 | 1937305 | 1829845 | 1828085 | 1843951 | 1842191 | 1927103 | 1925343 | 2087045 | 2085285 | 776537 | 774777 | 384437 | 386197 | 515131 | 516891 | 1094640 | 1096400 | 1883008 | 1881248 |
| 1286 BPSL1197 | 28 | 1937190 | 1936702 | 1827970 | 1827482 | 1842076 | 1841588 | 1925228 | 1924740 | 2085170 | 2084682 | 774662 | 774174 | 386312 | 386800 | 517006 | 517494 | 1096515 | 1097003 | 1881133 | 1880645 |
| 1287 BPSL1198 | 28 | 1936616 | 1935603 | 1826739 | 1826383 | 1841502 | 1840489 | 1924654 | 1923641 | 2084596 | 2083583 | 774088 | 773075 | 386886 | 387899 | 517580 | 518593 | 1097089 | 1098102 | 1880559 | 1879546 |
| 1288 BPSL1199 | 28 | 1935478 | 1934831 | 1826258 | 1825611 | 1840364 | 1839717 | 1923516 | 1922869 | 2083458 | 2082811 | 772950 | 772303 | 388024 | 388671 | 518718 | 519365 | 1098227 | 1098874 | 1879421 | 1878774 |
| 1289 BPSL1200 | 28 | 1934811 | 1933942 | 1825591 | 1824722 | 1839697 | 1838828 | 1922849 | 1921980 | 2082791 | 2081922 | 772283 | 771414 | 388691 | 389560 | 519385 | 520254 | 1098894 | 1099763 | 1878754 | 1877885 |
| 1290 BPSL1201 | 28 | 1933363 | 1932032 | 1824143 | 1822812 | 1838249 | 1836918 | 1921401 | 1920070 | 2081343 | 2080012 | 770835 | 769504 | 390139 | 391470 | 520833 | 522164 | 1100342 | 1101673 | 1877306 | 1875975 |
| 1291          | 28 | 1930663 | 1931898 | 1821443 | 1822678 | 1835549 | 1836784 | 1918701 | 1919936 | 2078643 | 2079878 |        |        |        |        |        |        |         |         |         |         |
| 1292 BPSL1202 | 28 | 1929107 | 1930651 | 1819887 | 1821431 | 1833993 | 1835537 | 1917145 | 1918689 | 2077087 | 2078631 | 767819 | 769363 | 393155 | 391611 | 523849 | 522305 | 1103358 | 1101814 | 1874289 | 1874840 |
| 1293 BPSL1203 | 28 | 1928415 | 1929047 | 1819195 | 1819827 | 1833301 | 1833933 | 1916453 | 1917085 | 2076395 | 2077027 | 767127 | 767759 | 393847 | 393215 | 524541 | 523909 | 1104050 | 1103418 | 1873597 | 1874229 |
| 1294 BPSL1204 | 28 | 1927470 | 1927967 | 1818250 | 1818747 | 1832356 | 1832853 | 1915508 | 1916005 | 2075450 | 2075947 | 766182 | 766679 | 394792 | 394295 | 525486 | 524989 | 1104995 | 1104498 | 1872652 | 1873149 |
| 1295 BPSL1205 | 28 | 1927095 | 1925821 | 1817875 | 1816601 | 1831981 | 1830707 | 1915133 | 1913859 | 2075075 | 2073801 | 765807 | 764533 | 395167 | 396441 | 525861 | 527135 | 1105370 | 1106644 | 1872277 | 1871003 |
| 1296 BPSL1206 | 28 | 1925712 | 1925446 | 1816492 | 1816226 | 1830598 | 1830332 | 1913750 | 1913484 | 2073692 | 2073426 | 764424 | 764158 | 396550 | 396816 | 527244 | 527510 | 1106753 | 1107019 | 1870894 | 1870628 |
| 1297 BPSL1207 | 28 | 1925139 | 1923001 | 1815919 | 1813781 | 1830025 | 1827887 | 1913177 | 1911039 | 2073119 | 2070981 | 763851 | 761713 | 397123 | 399261 | 527817 | 529955 | 1107326 | 1109464 | 1870321 | 1868183 |
| 1298 BPSL1208 | 28 | 1922882 | 1921866 | 1813662 | 1812646 | 1827768 | 1826752 | 1910920 | 1909904 | 2070862 | 2069846 | 761594 | 760578 | 399380 | 400396 | 530074 | 531090 | 1109583 | 1110599 | 1868064 | 1867048 |
| 1299 BPSL1209 | 28 | 1921758 | 1921006 | 1812538 | 1811786 | 1826644 | 1825892 | 1909796 | 1909044 | 2069738 | 2068986 | 760470 | 759718 | 400504 | 401256 | 531198 | 531950 | 1110707 | 1111459 | 1866940 | 1866188 |
| 1300 BPSL1210 | 28 | 1920923 | 1920549 | 1811703 | 1811329 | 1825809 | 1825435 | 1908961 | 1908587 | 2068903 | 2068529 | 759635 | 759261 | 401339 | 401713 | 532033 | 532407 | 1111542 | 1111916 | 1866105 | 1866731 |
| 1301 BPSL1211 | 28 | 1920197 | 1919841 | 1810977 | 1810621 | 1825083 | 1824727 | 1908235 | 1907879 | 2068177 | 2067821 | 758909 | 758553 | 402065 | 402421 | 532759 | 533115 | 1112268 | 1112624 | 1865379 | 1865023 |
| 1302 BPSL1212 | 28 | 1919817 | 1919299 | 1810597 | 1810079 | 1824703 | 1824185 | 1907855 | 1907337 | 2067797 | 2067279 | 758529 | 758011 | 402445 | 402963 | 533139 | 533657 | 1112648 | 1113166 | 1864999 | 1864481 |
| 1303 BPSL1213 | 28 | 1919275 | 1918676 | 1810055 | 1809456 | 1824161 | 1823562 | 1907313 | 1906714 | 2067345 | 2066656 | 757987 | 757388 | 402987 | 403586 | 533681 | 534280 | 1113190 | 1113789 | 1864457 | 1863858 |
| 1304 BPSL1214 | 28 | 1918662 | 1917412 | 1809442 | 1808192 | 1823548 | 1822298 | 1906700 | 1905450 | 2066642 | 2065392 | 757374 | 756124 | 403600 | 404850 | 534294 | 535544 | 1113803 | 1115053 | 1863844 | 1862594 |
| 1305 BPSL1215 | 28 | 1917240 | 1916758 | 1808020 | 1807538 | 1822126 | 1821644 | 1905278 | 1904796 | 2065220 | 2064738 | 755952 | 755470 | 405022 | 405504 | 535716 | 536198 | 1115225 | 1115707 | 1862422 | 1861940 |
| 1306 BPSL1216 | 28 | 1916758 | 1915451 | 1807538 | 1806231 | 1821644 | 1820337 | 1904796 | 1903489 | 2064738 | 2063431 | 755470 | 754163 | 405504 | 406811 | 536198 | 537505 | 1115707 | 1117014 | 1861940 | 1860633 |
| 1307 BPSL1217 | 28 | 1915365 | 1913038 | 1806145 | 1803818 | 1820251 | 1817924 | 1903403 | 1901076 | 2063345 | 2061018 | 754077 | 751750 | 406897 | 409224 | 537591 | 539918 | 1117100 | 1119421 | 1860547 | 1858220 |
| 1308 BPSL1218 | 28 | 1913034 | 1911973 | 1803814 | 1802753 | 1817920 | 1816859 | 1901072 | 1900011 | 2061014 | 2059953 | 751746 | 750685 | 409228 | 410289 | 539922 | 540983 | 1119431 | 1120492 | 1858216 | 1857155 |
| 1309 BPSL1219 | 28 | 1911954 | 1911469 | 1802734 | 1802249 | 1816840 | 1816355 | 1899992 | 1899507 | 2059934 |         |        |        |        |        |        |        |         |         |         |         |

|      |                  |    |         |         |         |         |         |         |         |         |         |         |        |        |        |        |        |        |         |         |         |         |
|------|------------------|----|---------|---------|---------|---------|---------|---------|---------|---------|---------|---------|--------|--------|--------|--------|--------|--------|---------|---------|---------|---------|
| 1313 | BPSL1223         | 28 | 1908303 | 1906816 | 1799083 | 1797596 | 1813189 | 1811702 | 1896341 | 1894854 | 2056283 | 2054796 | 747015 | 745528 | 413959 | 415446 | 544653 | 546140 | 1124162 | 1125649 | 1853485 | 1851998 |
| 1314 | BPSL1224         | 28 | 1906788 | 1905319 | 1797568 | 1796099 | 1811674 | 1810205 | 1894826 | 1893357 | 2054768 | 2053299 | 745500 | 744031 | 415474 | 416943 | 546168 | 547637 | 1125677 | 1127146 | 1851970 | 1850501 |
| 1315 | BPSL1225         | 28 | 1905316 | 1905014 | 1796096 | 1795794 | 1810202 | 1809900 | 1893354 | 1893052 | 2053296 | 2052994 | 744028 | 743726 | 416946 | 417248 | 547640 | 547942 | 1127149 | 1127451 | 1850498 | 1850196 |
| 1316 | BPSL1226         | 28 | 1904974 | 1904387 | 1795754 | 1795167 | 1809860 | 1809273 | 1893012 | 1892425 | 2052954 | 2052367 | 743686 | 743099 | 417288 | 417875 | 547982 | 548569 | 1127491 | 1128078 | 1850156 | 1849569 |
| 1317 | BPSL1227         | 28 | 1904232 | 1903813 | 1795012 | 1794593 | 1809118 | 1808699 | 1892270 | 1891851 | 2052212 | 2051793 | 742944 | 742525 | 418030 | 418449 | 548724 | 549143 | 1128233 | 1128652 | 1849414 | 1848995 |
| 1318 | BPSL1228         | 28 | 1903749 | 1902556 | 1794529 | 1793336 | 1808635 | 1807442 | 1891787 | 1890594 | 2051729 | 2050536 | 742461 | 741268 | 418513 | 419706 | 549207 | 550400 | 1128716 | 1129909 | 1848931 | 1847738 |
| 1319 | BPSL1229         | 28 | 1902541 | 1901411 | 1793321 | 1792191 | 1807427 | 1806297 | 1890579 | 1889449 | 2050521 | 2049391 | 741253 | 740123 | 419721 | 420851 | 550415 | 551545 | 1129924 | 1131054 | 1847723 | 1846593 |
| 1320 | BPSL1230         | 28 | 1901367 | 1900912 | 1792147 | 1791692 | 1806253 | 1805798 | 1889405 | 1888950 | 2049347 | 2048892 | 740079 | 739624 | 420895 | 421350 | 551589 | 552044 | 1131098 | 1131553 | 1846549 | 1846094 |
| 1321 | BPSL1231         | 28 | 1900912 | 1900433 | 1791692 | 1791213 | 1805798 | 1805319 | 1888950 | 1888471 | 2048892 | 2048413 | 739624 | 739145 | 421350 | 421829 | 552044 | 552523 | 1131553 | 1132032 | 1846094 | 1845615 |
| 1322 | BPSL1233         | 28 | 1900337 | 1899075 | 1791117 | 1789855 | 1805223 | 1803961 | 1888375 | 1887113 | 2048317 | 2047055 | 739049 | 737787 | 421925 | 423187 | 552619 | 553881 | 1132128 | 1133390 | 1845519 | 1844257 |
| 1323 | BPSL1234         | 28 | 1897568 | 1898791 | 1788348 | 1789571 | 1802454 | 1803677 | 1885606 | 1886829 | 2045548 | 2046771 | 736280 | 737503 | 424694 | 423471 | 555388 | 554165 | 1134897 | 1133674 | 1842750 | 1843973 |
| 1324 | BPSL1235         | 28 | 1896418 | 1897521 | 1787198 | 1788301 | 1801304 | 1802407 | 1884456 | 1885559 | 2044398 | 2045501 | 735130 | 736233 | 425844 | 424741 | 556538 | 555435 | 1136047 | 1134944 | 1841600 | 1842703 |
| 1325 | BPSL1236         | 28 | 1895677 | 1896387 | 1786457 | 1787167 | 1800563 | 1801273 | 1883715 | 1884425 | 2043657 | 2044367 | 734389 | 735099 | 426585 | 425875 | 557279 | 556569 | 1136788 | 1136078 | 1840859 | 1841569 |
| 1326 | BPSL1237         | 28 | 1894804 | 1895664 | 1785584 | 1786444 | 1799690 | 1800550 | 1882842 | 1883702 | 2042784 | 2043644 | 733516 | 734376 | 427458 | 426598 | 558152 | 557292 | 1137661 | 1136801 | 1839986 | 1840846 |
| 1327 | BPSL1238         | 28 | 1894654 | 1893983 | 1785434 | 1784763 | 1799540 | 1798869 | 1882692 | 1882021 | 2042634 | 2041963 | 733366 | 732695 | 427608 | 428279 | 558302 | 558973 | 1137811 | 1138482 | 1839836 | 1839165 |
| 1328 | BPSL1239         | 28 | 1892595 | 1893746 | 1783375 | 1784526 | 1796964 | 1798115 | 1880633 | 1881784 | 2040575 | 2041726 | 731307 | 732458 | 429667 | 428516 | 560361 | 559210 | 1139870 | 1138719 | 1837777 | 1838928 |
| 1329 | BPSL1240         | 28 | 1891860 | 1892525 | 1782640 | 1783305 | 1796229 | 1796894 | 1879898 | 1880563 | 2039840 | 2040505 | 730572 | 731237 | 430402 | 429737 | 561096 | 560431 | 1140605 | 1139940 | 1837042 | 1837707 |
| 1330 | BPSL1241         | 28 | 1891802 | 1891023 | 1782582 | 1781803 | 1796171 | 1795392 | 1879840 | 1879061 | 2039782 | 2039003 | 730514 | 729735 | 430460 | 431239 | 561154 | 561933 | 1140663 | 1141442 | 1836984 | 1836205 |
| 1331 | BPSL1242         | 28 | 1890961 | 1889810 | 1781741 | 1780590 | 1795330 | 1794179 | 1878999 | 1877848 | 2038941 | 2037790 | 729673 | 728522 | 431301 | 432452 | 561995 | 563146 | 1141504 | 1142655 | 1836143 | 1834992 |
| 1332 | BPSL1243         | 28 | 1888937 | 1889593 | 1779717 | 1780373 | 1793306 | 1793962 | 1876975 | 1877631 | 2036917 | 2037573 | 727649 | 728305 | 433325 | 432669 | 564019 | 563363 | 1143528 | 1142872 | 1834119 | 1834775 |
| 1333 | BPSL1244         | 28 | 1888142 | 1888813 | 1778922 | 1779593 | 1792511 | 1793182 | 1876339 | 1876851 | 2036122 | 2036793 | 726854 | 727525 | 434120 | 433449 | 564814 | 564143 | 1144323 | 1143652 | 1833324 | 1833995 |
| 1334 | BPSL1245         | 28 | 1887167 | 1888072 | 1777947 | 1778852 | 1791536 | 1792441 |         |         | 2035147 | 2036052 | 725879 | 726784 | 435095 | 434190 | 565789 | 564884 | 1145298 | 1144393 | 1832349 | 1833254 |
| 1335 | BPSL1246         | 28 | 1885816 | 1887030 | 1776596 | 1777810 | 1790185 | 1791399 | 1874386 | 1875600 | 2033793 | 2035010 | 724528 | 725742 | 436446 | 435232 | 567140 | 565926 | 1146649 | 1145435 | 1830998 | 1832212 |
| 1336 | BPSL1247         |    |         |         |         |         |         |         |         |         |         |         |        |        |        |        |        |        |         |         |         |         |
| 1337 | BPSL1248         |    |         |         |         |         |         |         |         |         |         |         |        |        |        |        |        |        |         |         |         |         |
| 1338 | BPSL1249         |    |         |         |         |         |         |         |         |         |         |         |        |        |        |        |        |        |         |         |         |         |
| 1339 | BPSL1250         |    |         |         |         |         |         |         |         |         |         |         |        |        |        |        |        |        |         |         |         |         |
| 1340 | BPSL1251         |    |         |         |         |         |         |         |         |         |         |         |        |        |        |        |        |        |         |         |         |         |
| 1341 | BPSL1252         |    |         |         |         |         |         |         |         |         |         |         |        |        |        |        |        |        |         |         |         |         |
| 1342 | BPSL1253         |    |         |         |         |         |         |         |         |         |         |         |        |        |        |        |        |        |         |         |         |         |
| 1343 | BPSL1254         |    |         |         |         |         |         |         |         |         |         |         |        |        |        |        |        |        |         |         |         |         |
| 1344 | BPSL1255         |    |         |         |         |         |         |         |         |         |         |         |        |        |        |        |        |        |         |         |         |         |
| 1345 | BPSL1256         |    |         |         |         |         |         |         |         |         |         |         |        |        |        |        |        |        |         |         |         |         |
| 1346 | BPSL1257         |    |         |         |         |         |         |         |         |         |         |         |        |        |        |        |        |        |         |         |         |         |
| 1347 | BPSL1258         |    |         |         |         |         |         |         |         |         |         |         |        |        |        |        |        |        |         |         |         |         |
| 1348 | BPSL1259         |    |         |         |         |         |         |         |         |         |         |         |        |        |        |        |        |        |         |         |         |         |
| 1349 | BPSL1260         |    |         |         |         |         |         |         |         |         |         |         |        |        |        |        |        |        |         |         |         |         |
| 1350 | BPSL1261         |    |         |         |         |         |         |         |         |         |         |         |        |        |        |        |        |        |         |         |         |         |
| 1351 | BPSL1262         |    |         |         |         |         |         |         |         |         |         |         |        |        |        |        |        |        |         |         |         |         |
| 1352 | BPSL1263         |    |         |         |         |         |         |         |         |         |         |         |        |        |        |        |        |        |         |         |         |         |
| 1353 | BPSL1264         |    |         |         |         |         |         |         |         |         |         |         |        |        |        |        |        |        |         |         |         |         |
| 1354 | BPSL1265         |    |         |         |         |         |         |         |         |         |         |         |        |        |        |        |        |        |         |         |         |         |
| 1355 | BPSL1266         |    |         |         |         |         |         |         |         |         |         |         |        |        |        |        |        |        |         |         |         |         |
| 1356 | BPSL1267         |    |         |         |         |         |         |         |         |         |         |         |        |        |        |        |        |        |         |         |         |         |
| 1357 | BPSL1268         |    |         |         |         |         |         |         |         |         |         |         |        |        |        |        |        |        |         |         |         |         |
| 1358 | Chr1_62_IS407A_C | 28 |         |         |         |         |         |         |         |         | 2032228 | 2033345 |        |        |        |        |        |        |         |         |         |         |
| 1359 | BPSL1269         | 28 | 1881146 | 1881643 | 1772175 | 1772672 | 1785584 | 1786081 | 1869927 | 1870424 | 2032085 | 2032192 | 719858 | 720355 | 441116 | 440619 | 569719 | 567761 | 1151319 | 1150822 | 1829563 | 1830060 |
| 1360 | BPSL1270         | 28 | 1878639 | 1880597 | 1769668 | 1771626 | 1783077 | 1785035 | 1867525 | 1869378 | 2030244 | 2031536 | 717352 | 719310 | 443622 | 441664 | 569719 | 567761 | 1153826 | 1151868 | 1827239 | 1829014 |
| 1361 | BPSL1271         | 28 | 1878382 | 1877870 | 1769411 | 1768899 | 1782820 | 1782308 | 1867309 | 1866797 | 2030010 | 2029498 | 717095 | 716583 | 443879 | 444391 | 569992 | 570441 | 1154083 | 1154595 | 1826960 | 1826448 |
| 1362 | BPSL1272         | 28 | 1877777 | 1877319 | 1768806 | 1768549 | 1782215 | 1781757 | 1866704 | 1866246 | 2029405 | 2028947 | 716490 | 716032 | 444484 | 444942 | 570534 | 570992 | 1154688 | 1155146 | 1826355 | 1825897 |
| 1363 | BPSL1273         | 28 | 1877049 | 1876426 | 1767979 | 1767356 | 1781487 | 1780864 | 1866025 | 1865402 | 2028625 | 2028035 | 715762 | 715139 | 445212 | 445835 | 571262 | 571885 | 1155416 | 1156039 | 1825627 | 1825004 |

|                |                   |         |         |         |         |         |         |         |         |         |         |         |        |        |        |        |        |         |         |         |         |         |
|----------------|-------------------|---------|---------|---------|---------|---------|---------|---------|---------|---------|---------|---------|--------|--------|--------|--------|--------|---------|---------|---------|---------|---------|
| 1364 BPSL1274  | 28                | 1874974 | 1875357 | 1765904 | 1766287 | 1779412 | 1779795 | 1863950 | 1864333 | 2026583 | 2026966 | 713687  | 714070 | 447287 | 446904 | 573337 | 572954 | 1157491 | 1157108 | 1823552 | 1823935 |         |
| 1365 BPSL1275  | 28                | 1874827 | 1874363 | 1765757 | 1765293 | 1779265 | 1778801 | 1863803 | 1863339 | 2026436 | 2025972 | 713540  | 713076 | 447434 | 447898 | 573484 | 573948 | 1157638 | 1158102 | 1823405 | 1822941 |         |
| 1366 BPSL1276  | 28                | 1873439 | 1874215 | 1764369 | 1765145 | 1777877 | 1778653 | 1862513 | 1863250 | 2025048 | 2025824 | 712165  | 712941 | 448809 | 448033 | 574859 | 574083 | 1159013 | 1158237 | 1822030 | 1822806 |         |
| 1367 BPSL1277  | 28                | 1871731 | 1873434 | 1762661 | 1764364 | 1776169 | 1777872 | 1860805 | 1862508 | 2023340 | 2025043 | 710451  | 712160 | 450523 | 448814 | 576573 | 574864 | 1160727 | 1159018 | 1820316 | 1822025 |         |
| 1368 BPSL1278  | 28                | 1870686 | 1871738 | 1761616 | 1762668 | 1775124 | 1776176 | 1859760 | 1860812 | 2022295 | 2023347 | 709406  | 710458 | 451568 | 450516 | 577618 | 576566 | 1161772 | 1160720 | 1819271 | 1820323 |         |
| 1369 BPSL1279  | 28                | 1870446 | 1870270 | 1761376 | 1761200 | 1774884 | 1774708 | 1859520 | 1859344 | 2022055 | 2021879 | 709166  | 708990 | 451808 | 451984 | 577858 | 578034 | 1162012 | 1162188 | 1819031 | 1818855 |         |
| 1370 BPSL1280  | 28                | 1868761 | 1870122 | 1759691 | 1761052 | 1773199 | 1774560 | 1857835 | 1859196 | 2020370 | 2021731 | 707481  | 708842 | 453493 | 452132 | 579543 | 578182 | 1163697 | 1162336 | 1817346 | 1818707 |         |
| 1371 BPSL1281  | 28                | 1866300 | 1868573 | 1757230 | 1759503 | 1770738 | 1773011 | 1855374 | 1857647 | 2017909 | 2020182 | 705020  | 707293 | 455954 | 453681 | 582004 | 579731 | 1166158 | 1163885 | 1814885 | 1817158 |         |
| 1372 BPSL1282  | 28                | 1865311 | 1861970 | 1756255 | 1752914 | 1768860 | 1765519 | 1854392 | 1851051 | 2017025 | 2013684 | 704311  | 700970 | 456838 | 460179 | 582811 | 586152 | 1166923 | 1170264 | 1814204 | 1812441 |         |
| 1373 BPSL1283  | 28                | 1861970 | 1858161 | 1752914 | 1749105 | 1765519 | 1762031 | 1851051 | 1849885 | 2013684 | 2009875 | 700970  | 697161 | 460179 | 463988 | 586152 | 589961 | 1170264 | 1174073 | 1811002 | 1807193 |         |
| 1374 BPSL1284  | 28                | 1858161 | 1855468 | 1749105 | 1746412 | 1761159 | 1758517 | 1847592 | 1844899 | 2009875 | 2007182 | 697161  | 694468 | 463988 | 466681 | 589961 | 592654 | 1174073 | 1176766 | 1807193 | 1805655 |         |
| 1375           | Chr1_63_IS407A_C  | 28      |         |         |         |         |         |         |         |         |         |         |        |        |        |        |        |         |         | 3221885 | 3223120 |         |
| 1376 BPSL1285  | 28                | 1855468 | 1855067 | 1746412 | 1746011 | 1758517 | 1758116 | 1844899 | 1844498 | 2007182 | 2006781 | 694468  | 694067 | 466681 | 467082 | 592654 | 593055 | 1176766 | 1177167 | 3220614 | 3220213 |         |
| 1377 BPSL1286  | 28                | 1853388 | 1854164 | 1744332 | 1745108 | 1756437 | 1757213 | 1842819 | 1843595 | 2005142 | 2005918 | 692380  | 693156 | 468753 | 467977 | 594734 | 593958 | 1178806 | 1178030 | 3218566 | 3219342 |         |
| 1378 BPSL1287  | 28                | 1851421 | 1852350 | 1742365 | 1743294 | 1754470 | 1755399 | 1840852 | 1841781 | 2003175 | 2004104 | 690413  | 691342 | 470720 | 469791 | 596701 | 595772 | 1180764 | 1179844 | 3216608 | 3217528 |         |
| 1379 BPSL1288  | 28                | 1850926 | 1851147 | 1741870 | 1742091 | 1753975 | 1754196 | 1840357 | 1840578 | 2002680 | 2002901 | 689918  | 690139 | 471215 | 470994 | 597196 | 596975 |         |         |         |         |         |
| 1380 BPSL1289  | 28                | 1850462 | 1850671 | 1741406 | 1741615 | 1753511 | 1753720 | 1839893 | 1840102 | 2002216 | 2002425 | 689454  | 689663 | 471679 | 471470 | 597660 | 597451 |         |         |         |         |         |
| 1381           | Chr1_64a_IS407A_A | 28      | 1849090 | 1850325 | 1740034 | 1741269 | 1752139 | 1753374 | 1838521 | 1839756 | 2000844 | 2002079 | 688082 | 689317 | 471816 | 473051 | 597797 | 599032  | 1180766 | 1182001 | 3215347 | 3216582 |
| 1382           | Chr1_64b_IS407A_A | 28      | 3186007 | 3187242 | 3084797 | 3086032 | 3101880 | 3103115 | 3172259 | 3173494 | 836600  | 837835  |        |        |        |        |        |         |         |         |         |         |
| 1383 BPSL1290  | 29                | 3183984 | 3185912 | 3082774 | 3084702 | 3099857 | 3101785 | 3170236 | 3172164 | 839858  | 837930  | 686059  | 687987 | 475074 | 473146 | 601055 | 599127 | 1184024 | 1182096 | 3213325 | 3215253 |         |
| 1384 BPSL1290a | 29                | 3183353 | 3183709 | 3082143 | 3082499 | 3099226 | 3099582 | 3169605 | 3169961 | 840489  | 840133  | 685428  | 685784 | 475705 | 475349 | 601686 | 601330 | 1184655 | 1184299 | 3212694 | 3213050 |         |
| 1385 BPSL1291  | 29                | 3183334 | 3183032 | 3082124 | 3081822 | 3099207 | 3098905 | 3169586 | 3169284 | 840508  | 840810  | 685409  | 685107 | 475724 | 476026 | 601705 | 602007 | 1184674 | 1184976 | 3212675 | 3212373 |         |
| 1386 BPSL1292  | 29                | 3182868 | 3182047 | 3081658 | 3080837 | 3098741 | 3097920 | 3169120 | 3168299 | 840974  | 841795  | 684943  | 684122 | 476190 | 477011 | 602171 | 602992 | 1185140 | 1185961 | 3212209 | 3211388 |         |
| 1387 BPSL1293  | 29                | 3181633 | 3180920 | 3080423 | 3079710 | 3097506 | 3096793 | 3167885 | 3167172 | 842209  | 842922  | 683744  | 683031 | 477389 | 478102 | 603373 | 604086 | 1186375 | 1187088 | 3210974 | 3210261 |         |
| 1388 BPSL1294  | 29                | 3180901 | 3180113 | 3079691 | 3078903 | 3096774 | 3095986 | 3167153 | 3166635 | 842941  | 843729  | 683012  | 682224 | 478121 | 478909 | 604105 | 604893 | 1187107 | 1187895 | 3210242 | 3209454 |         |
| 1389 BPSL1295  | 29                | 3179656 | 3178724 | 3078446 | 3077514 | 3095529 | 3094597 | 3165908 | 3164976 | 844186  | 845118  | 681767  | 680835 | 479366 | 480298 | 605350 | 606282 | 1188352 | 1189284 | 3208997 | 3208065 |         |
| 1390 BPSL1296  | 29                | 3177177 | 3178370 | 3077967 | 3077160 | 3093050 | 3094243 | 3163429 | 3164622 | 846665  | 845472  | 679281  | 680474 | 481859 | 480666 | 607836 | 606643 | 1190859 | 1189666 | 3206511 | 3207704 |         |
| 1391 BPSL1297  | 29                | 3176898 | 3176113 | 3075688 | 3074903 | 3092771 | 3091986 | 3163150 | 3162365 | 846944  | 847729  | 679002  | 678217 | 482138 | 482923 | 608115 | 608900 | 1191138 | 1191923 | 3206232 | 3205447 |         |
| 1392 BPSL1298  | 29                | 3175978 | 3175571 | 3074768 | 3074361 | 3091851 | 3091444 | 3162230 | 3161823 | 847864  | 848271  | 678076  | 677669 | 483070 | 483477 | 609035 | 609442 | 1192100 | 1192507 | 3205300 | 3204893 |         |
| 1393 BPSL1299  | 29                | 3174385 | 3175209 | 3073175 | 3073999 | 3090258 | 3091082 | 3160637 | 3161461 | 849457  | 848633  | 676483  | 677307 | 484663 | 483839 | 610628 | 609804 | 1193693 | 1192869 | 3203707 | 3204531 |         |
| 1394 BPSL1300  | 29                | 3173120 | 3174145 | 3071910 | 3072935 | 3088893 | 3090018 | 3159372 | 3160397 | 850701  | 849676  | 675225  | 676250 | 485914 | 484889 | 611886 | 610861 | 1194986 | 1193961 | 3202435 | 3203460 |         |
| 1395 BPSL1301  | 29                | 3172064 | 3172963 | 3070854 | 3071753 | 3087937 | 3088836 | 3158316 | 3159215 | 851757  | 850858  | 674169  | 675068 | 486970 | 486071 | 612942 | 612043 | 1196042 | 1195143 | 3201379 | 3202278 |         |
| 1396 BPSL1302  | 29                | 3170022 | 3170843 | 3068812 | 3069633 | 3085895 | 3086716 | 3156274 | 3157095 | 853799  | 852978  | 672127  | 672948 | 489012 | 488191 | 614984 | 614163 | 1198075 | 1197254 | 3199346 | 3200167 |         |
| 1397 BPSL1303  | 29                | 3168873 | 3169931 | 3067663 | 3068721 | 3084746 | 3085804 | 3155125 | 3156183 | 854948  | 853890  | 670978  | 672036 | 490161 | 489103 | 616133 | 615075 | 1199224 | 1198166 | 3198197 | 3199255 |         |
| 1398 BPSL1304  | 29                | 3167800 | 3168813 | 3066590 | 3067603 | 3083673 | 3084686 | 3154052 | 3155065 | 856021  | 855008  | 669905  | 670918 | 491234 | 490221 | 617206 | 616193 | 1200297 | 1199284 | 3197124 | 3198137 |         |
| 1399 BPSL1305  | 29                | 3164301 | 3165452 | 3063091 | 3064242 | 3080174 | 3081325 | 3150553 | 3151704 | 859520  | 858369  | 666399  | 667550 | 494726 | 493575 | 620691 | 619540 | 1203810 | 1202659 | 3193618 | 3194769 |         |
| 1400 BPSL1306  | 29                | 3162571 | 3163932 | 3061361 | 3062722 | 3078444 | 3079805 | 3148823 | 3150184 | 861250  | 859889  | 664669  | 666030 | 496456 | 495095 | 622421 | 621060 | 1205556 | 1204195 | 3191864 | 3193225 |         |
| 1401 BPSL1307  | 29                | 3161884 | 3161285 | 3060674 | 3060075 | 3077757 | 3077158 | 3148136 | 3147537 | 861937  | 862536  | 663982  | 663383 | 497143 | 497742 | 623108 | 623707 | 1206243 | 1206842 | 3191181 | 3190582 |         |
| 1402 BPSL1308  | 29                | 3161229 | 3160435 | 3060019 | 3059225 | 3077102 | 3076308 | 3147481 | 3146687 | 862592  | 863386  | 663327  | 662533 | 497798 | 498592 | 623763 | 624557 | 1206898 | 1207692 | 3190526 | 3189732 |         |
| 1403 BPSL1309  | 29                | 3159401 | 3160036 | 3058172 | 3058807 | 3075274 | 3075909 | 3145653 | 3146288 | 864420  | 863785  | 661499  | 662134 | 499626 | 498991 | 625546 | 624956 | 1208726 | 1208091 | 3188698 | 3189333 |         |
| 1404 BPSL1310  | 29                | 3159279 | 3157741 | 3058050 | 3056512 | 3075152 | 3074937 | 3145531 | 3143993 | 864542  | 866080  | 661377  | 659839 | 499748 | 501286 | 625649 | 626959 | 1208848 | 1210386 | 3188576 | 3187239 |         |
| 1405 BPSL1311  | 29                | 3157038 | 3157529 | 3055809 | 3056300 | 3072140 | 3072631 | 3143290 | 3143781 | 866792  | 866301  | 659133  | 659624 | 502022 | 501531 | 627683 | 627192 | 1211086 | 1210595 | 3186540 | 3187031 |         |
| 1406 BPSL1312  | 29                | 3156879 | 3154966 | 3055650 | 3053737 | 3071981 | 3070068 | 3143131 | 3141218 | 866951  | 868864  | 658974  | 657061 | 502181 | 504094 | 627842 | 629755 | 1211245 | 1213158 | 3186381 | 3184468 |         |
| 1407 BPSL1313  | 29                | 3153418 | 3154746 | 3052189 | 3053517 | 3068520 | 3069848 | 3139670 | 3140998 | 870412  | 869084  | 655508  | 656836 | 505647 | 504319 | 631308 | 629980 | 1214706 | 1213378 | 3182920 | 3184248 |         |
| 1408 BPSL1314  | 29                | 3152692 | 3153393 | 3051463 | 3052164 | 3067275 | 3067568 | 3138944 | 3139645 | 871138  | 870437  | 654782  | 655483 | 506373 | 505672 | 632034 | 631333 | 1215432 | 1214731 | 3182194 | 3182895 |         |
| 1409 BPSL1315  | 29                | 3151629 | 3152525 | 3050400 | 3051296 | 3066212 | 3067108 | 3137881 | 3138777 | 872201  | 871305  | 653719  | 654615 | 507436 | 506540 | 633097 | 632201 | 1216495 | 1215599 | 3181131 | 3182027 |         |
| 1410 BPSL1316  | 29                | 3151378 | 3150608 | 3050149 | 3049379 | 3065961 | 3065191 | 3137630 | 3136860 | 872452  | 873222  | 653468  | 652698 | 507687 | 508457 | 633348 | 634118 | 1216746 | 1217516 | 3180880 | 3180110 |         |
| 1411 BPSL1317  | 29                | 3149021 | 3149209 | 3047792 | 3047980 | 3063604 | 3063792 | 3135273 | 3135461 | 874809  | 874621  | 651104  | 652474 | 510051 | 508681 | 635712 | 634342 | 1219103 | 1218915 | 3178523 | 3178711 |         |
| 1412 BPSL1318  | 29                | 3148171 | 3148575 | 3046942 | 3047346 | 3062    |         |         |         |         |         |         |        |        |        |        |        |         |         |         |         |         |

|                        |    |                   |         |         |          |         |         |         |         |         |        |        |        |        |        |        |        |         |         |         |         |        |
|------------------------|----|-------------------|---------|---------|----------|---------|---------|---------|---------|---------|--------|--------|--------|--------|--------|--------|--------|---------|---------|---------|---------|--------|
| 1415 BPSL1321          | 29 | 3144093           | 3145565 | 3042864 | 3044336  | 3058676 | 3060148 | 3130345 | 3131817 | 879737  | 878265 | 646182 | 647654 | 514973 | 513501 | 640634 | 639162 | 1224031 | 1222559 | 3173595 | 3175067 |        |
| 1416 BPSL1322          | 29 | 3142987           | 3143385 | 3041758 | 3042156  | 3057570 | 3057968 | 3129239 | 3129637 | 880843  | 880445 | 645076 | 645474 | 516079 | 515681 | 641740 | 641342 | 1225137 | 1224739 | 3172489 | 3172887 |        |
| 1417 BPSL1323          | 29 | 3142518           | 3142952 | 3041289 | 3041723  | 3057101 | 3057535 | 3128770 | 3129204 | 881312  | 880878 | 644607 | 645041 | 516548 | 516114 | 642209 | 641775 | 1225606 | 1225172 | 3172020 | 3172454 |        |
| 1418 BPSL1323a         | 29 | 3142128           | 3141808 | 3040899 | 3040579  | 3056711 | 3056391 | 3128380 | 3128060 | 881702  | 882022 | 644217 | 643897 | 516938 | 517258 | 642599 | 642919 | 1225996 | 1226316 | 3171630 | 3171310 |        |
| 1419 BPSL1324          | 29 | 3140878           | 3139016 | 3039649 | 3037787  | 3055461 | 3053599 | 3127130 | 3125268 | 882946  | 884808 | 642988 | 641126 | 518185 | 520047 | 643837 | 645699 | 1227258 | 1229120 | 3170368 | 3168506 |        |
| 1420 BPSL1325          | 29 | 3138733           | 3137804 | 3037504 | 3036575  | 3053316 | 3052387 | 3124985 | 3124056 | 885091  | 886020 | 640843 | 639914 | 520330 | 521259 | 645982 | 646911 | 1229403 | 1230332 | 3168223 | 3167294 |        |
| 1421 BPSL1326          | 29 | 3136382           | 3137227 | 3035153 | 3035998  | 3050965 | 3051810 | 3122634 | 3123479 | 887442  | 886597 | 638492 | 639337 | 522681 | 521836 | 648333 | 647488 | 1231754 | 1230909 | 3165872 | 3166717 |        |
| 1422 BPSL1327          | 29 | 3136111           | 3135719 | 3034492 | 3034100  | 3050415 | 3050023 | 3122344 | 3121952 | 887784  | 888176 | 638221 | 637829 | 522952 | 523344 | 648667 | 649059 | 1232025 | 1232417 | 3165545 | 3165153 |        |
| 1423 BPSL1328          | 29 | 3135693           | 3134938 | 3034074 | 3033319  | 3049997 | 3049242 | 3121926 | 3121171 | 888202  | 888957 | 637803 | 637048 | 523370 | 524125 | 649085 | 649840 | 1232443 | 1233198 | 3165127 | 3164372 |        |
| 1424 BPSL1329          | 29 | 3134615           | 3132978 | 3032996 | 3031359  | 3048919 | 3047282 | 3120848 | 3119211 | 889370  | 891007 | 636728 | 635091 | 524454 | 526091 | 650160 | 651797 | 1233593 | 1235230 | 3163968 | 3162331 |        |
| 1425 BPSL1330          | 29 | 3132961           | 3132647 | 3033142 | 30331028 | 3047265 | 3046951 | 3119194 | 3118880 | 891024  | 891338 | 635074 | 634760 | 526108 | 526422 | 651814 | 652128 | 1235247 | 1235561 | 3162314 | 3162000 |        |
| 1426 BPSL1331          | 29 | 3132647           | 3131703 | 3031028 | 3030084  | 3046951 | 3046007 | 3118880 | 3117936 | 891338  | 892282 | 634760 | 633816 | 526422 | 527366 | 652128 | 653072 | 1235561 | 1236505 | 3162000 | 3161056 |        |
| 1427 BPSL1332          | 29 | 3131713           | 3130991 | 3030094 | 3029372  | 3046017 | 3045295 | 3117946 | 3117224 | 892272  | 892994 | 633826 | 633104 | 527356 | 528078 | 653062 | 653784 | 1236495 | 1237217 | 3161066 | 3160344 |        |
| 1428 BPSL1333          | 29 | 3130977           | 3130090 | 3029358 | 3028972  | 3045281 | 3044394 | 3117210 | 3116323 | 893008  | 893895 | 633090 | 632203 | 528092 | 528979 | 653798 | 654685 | 1237231 | 1238118 | 3160330 | 3159443 |        |
| 1429 BPSL1334          | 29 | 3129565           | 3128798 | 3027491 | 3026724  | 3043869 | 3043102 | 3115798 | 3115031 | 894423  | 895190 | 631708 | 630941 | 529468 | 530235 | 655382 | 656035 | 1238640 | 1239407 | 3158945 | 3158610 |        |
| 1430 BPSL1335          | 29 | 3128798           | 3127863 | 3026724 | 3025789  | 3043102 | 3042167 | 3115031 | 3114096 | 895190  | 896125 | 630941 | 630006 | 530235 | 531170 | 656035 | 656970 | 1239407 | 1240342 | 3158180 | 3157470 |        |
| 1431 BPSL1336          | 29 | 3127766           | 3127224 | 3025692 | 3025150  | 3042070 | 3041528 | 3113999 | 3113457 | 896222  | 896764 | 629909 | 629367 | 531267 | 531809 | 657067 | 657609 | 1240439 | 1240981 | 738196  | 738738  |        |
| 1432 BPSL1337          | 29 | 3126986           | 3126075 | 3024912 | 3024001  | 3041290 | 3040379 | 3113219 | 3112308 | 897164  | 898075 | 629048 | 628137 | 532173 | 533084 | 657973 | 658884 | 1241381 | 1242292 | 739165  | 740076  |        |
| 1433 BPSL1338_ppartial | 29 | 3125680           | 3125477 | 3023599 | 3023396  | 3039977 | 3039774 | 3111913 | 3111710 | 898463  | 898666 | 627700 | 627497 | 533493 | 533696 | 659279 | 659482 | 1242673 | 1242876 | 740450  | 740653  |        |
| 1434                   |    | Chr1_65a_IS407A_A | 3124245 | 3125480 | 3022164  | 3023399 | 3038542 | 3039777 | 3110478 | 3111713 | 898663 | 899898 | 626265 | 627500 | 533693 | 534928 | 659479 | 660714  | 1242873 | 1244108 | 740650  | 741885 |
| 1435                   |    | Chr1_65b_IS407A_A | 788024  | 789259  | 665167   | 666402  | 669375  | 670610  | 783009  | 784244  |        |        |        |        |        |        |        |         |         |         |         |        |
| 1436 BPSL1338_ppartial | 30 | 789256            | 789702  | 666399  | 666845   | 670607  | 671053  | 784241  | 784687  | 899895  | 900341 | 626268 | 625822 | 534925 | 535371 | 660711 | 661157 | 1244105 | 1244551 | 741882  | 742328  |        |
| 1437 BPSL1339          | 30 | 791676            | 790192  | 668819  | 667335   | 673027  | 671543  | 786661  | 785177  | 902308  | 900824 | 623862 | 625346 | 537324 | 535840 | 663110 | 661626 | 1246511 | 1245027 | 744281  | 742797  |        |
| 1438 BPSL1340          | 30 | 792211            | 792540  | 669354  | 669683   | 673562  | 673891  | 787196  | 787525  | 902843  | 903172 | 623327 | 622998 | 537859 | 538188 | 663645 | 663974 | 1247046 | 1247375 | 744816  | 745145  |        |
| 1439 BPSL1341          | 30 | 793698            | 792979  | 670841  | 670122   | 675614  | 674895  | 788672  | 787953  | 904234  | 903515 | 621840 | 622559 | 539282 | 538563 | 665076 | 664357 | 1248477 | 1247758 | 746263  | 745544  |        |
| 1440 BPSL1342          | 30 | 794202            | 793759  | 671345  | 670902   | 676118  | 675675  | 789176  | 788733  | 904738  | 904295 | 621336 | 621779 | 539786 | 539343 | 665580 | 665137 | 1248981 | 1248538 | 746767  | 746324  |        |
| 1441 BPSL1343          | 30 | 795011            | 794202  | 672154  | 671345   | 676927  | 676118  | 789985  | 789176  | 905547  | 904738 | 620527 | 621336 | 540595 | 539786 | 666389 | 665580 | 1249790 | 1248891 | 747576  | 746767  |        |
| 1442 BPSL1344          | 30 | 795032            | 795835  | 672175  | 672978   | 676948  | 677751  | 790006  | 790809  | 905568  | 906371 | 620506 | 619703 | 540616 | 541419 | 666410 | 667213 | 1249811 | 1250614 | 747597  | 748400  |        |
| 1443 BPSL1345          | 30 | 795922            | 797580  | 673065  | 674723   | 677838  | 679496  | 790896  | 792554  | 906458  | 908116 | 619616 | 617958 | 541506 | 543164 | 667300 | 668958 | 1250701 | 1252359 | 748487  | 750145  |        |
| 1444 BPSL1346          | 30 | 797664            | 798953  | 674807  | 676096   | 679580  | 680869  | 792638  | 793927  | 908200  | 909489 | 617874 | 616585 | 543248 | 544537 | 669042 | 670331 | 1252443 | 1253732 | 750229  | 751518  |        |
| 1445 BPSL1347          | 30 | 800205            | 799069  | 677348  | 676212   | 682121  | 680985  | 795179  | 794043  | 910741  | 909605 | 615333 | 616469 | 545789 | 544653 | 671583 | 670447 | 1254984 | 1253848 | 752770  | 751634  |        |
| 1446 BPSL1348          | 30 | 800433            | 801452  | 677576  | 678595   | 682349  | 683368  | 795407  | 796426  | 910969  | 911988 | 615105 | 614086 | 546017 | 547036 | 671811 | 672830 | 1255212 | 1256231 | 752998  | 754017  |        |
| 1447 BPSL1349          | 30 | 801872            | 803014  | 679015  | 680157   | 683788  | 684930  | 796846  | 797988  | 912408  | 913550 | 613686 | 612544 | 547436 | 548578 | 673230 | 674372 | 1256651 | 1257793 | 754437  | 755579  |        |
| 1448 BPSL1350          | 30 | 803049            | 803708  | 680192  | 680851   | 684965  | 685624  | 798023  | 798682  | 913585  | 914244 | 612509 | 611850 | 548613 | 549272 | 674407 | 675066 | 1257828 | 1258487 | 755614  | 756273  |        |
| 1449 BPSL1351          | 30 | 803763            | 807014  | 680906  | 684157   | 685679  | 688930  | 798737  | 801988  | 914299  | 917550 | 611795 | 608544 | 549327 | 552578 | 675121 | 678372 | 1258542 | 1261793 | 756328  | 759579  |        |
| 1450 BPSL1352          | 30 | 807136            | 807609  | 684279  | 684752   | 689052  | 689525  | 802110  | 802583  | 917672  | 918145 | 608422 | 607949 | 552700 | 553173 | 678494 | 678967 | 1261915 | 1262388 | 759701  | 760174  |        |
| 1451 BPSL1353          | 30 | 807612            | 808112  | 684755  | 685255   | 689528  | 689860  | 802758  | 803108  | 918148  | 918648 | 607946 | 607446 | 553176 | 553676 | 678970 | 679470 | 1262391 | 1262891 | 760177  | 760677  |        |
| 1452 BPSL1354          | 30 | 808740            | 808189  | 685883  | 685332   | 691237  | 690740  | 803736  | 803185  | 919276  | 918725 | 606818 | 607369 | 554304 | 553753 | 680098 | 679547 | 1263519 | 1262968 | 761305  | 760754  |        |
| 1453 BPSL1355          | 30 | 808934            | 809593  | 686077  | 686736   | 691431  | 692090  | 803930  | 804589  | 919470  | 920129 | 606624 | 605965 | 554498 | 555157 | 680292 | 680951 | 1263713 | 1264372 | 761499  | 762158  |        |
| 1454 BPSL1356          | 30 | 809764            | 811647  | 686907  | 688790   | 692261  | 694144  | 804760  | 806643  | 920300  | 922183 | 605794 | 603911 | 555328 | 557211 | 681122 | 683005 | 1264543 | 1266426 | 762329  | 764212  |        |
| 1455 BPSL1357          | 30 | 811763            | 812650  | 688906  | 689793   | 694260  | 695147  | 806759  | 807646  | 922299  | 923186 | 603795 | 602908 | 557327 | 558214 | 683121 | 684008 | 1266542 | 1267429 | 764328  | 765215  |        |
| 1456 BPSL1358          | 30 | 812679            | 814034  | 689822  | 691177   | 695176  | 696531  | 807675  | 809030  | 923215  | 924570 | 602879 | 601524 | 558243 | 559598 | 684037 | 685392 | 1267458 | 1268813 | 765244  | 766599  |        |
| 1457 BPSL1359          | 30 | 814473            | 815498  | 691898  | 692923   | 697765  | 698790  | 809484  | 810509  | 925093  | 926118 | 601085 | 600060 | 560037 | 561062 | 685909 | 686934 | 1269252 | 1270277 | 767108  | 768133  |        |
| 1458 BPSL1360          | 30 | 815608            | 816591  | 693506  | 694489   | 698900  | 699883  | 810629  | 811141  | 926228  | 927211 | 599950 | 598967 | 561172 | 562155 | 687044 | 688027 | 1270387 | 1271370 | 768243  | 769226  |        |
| 1459 BPSL1361          | 30 | 816612            | 817481  | 694510  | 695379   | 699904  | 700773  | 811162  | 812031  | 927232  | 928101 | 598946 | 598077 | 562176 | 563045 | 688048 | 688917 | 1271391 | 1272260 | 769247  | 770116  |        |
| 1460 BPSL1362          | 30 | 817500            | 818345  | 695398  | 696243   | 700792  | 701637  | 812050  | 812895  | 928120  | 928965 | 598058 | 597213 | 563064 | 563909 | 688936 | 689781 | 1272279 | 1273124 | 770135  | 770980  |        |
| 1461 BPSL1363          | 30 | 818368            | 819069  | 696266  | 696967   | 701660  | 702361  | 812918  | 813619  | 928988  | 929689 | 597190 | 596489 | 563932 | 564633 | 689804 | 690505 | 1273147 | 1273848 | 771003  | 771704  |        |
| 1462 BPSL1364          | 30 | 819101            | 819799  | 696999  | 697697   | 702393  | 703091  | 813651  | 814349  | 929721  | 930419 | 596457 | 595759 | 564665 | 565363 | 690537 | 691235 | 1273880 | 1274578 | 771736  | 772434  |        |
| 1463 BPSL1365          | 30 | 819872            | 821179  | 697770  | 699077   | 703164  | 704471  | 814422  | 815729  | 930492  | 931799 | 595686 | 594379 | 565436 | 566743 | 691308 | 692615 | 1274651 | 1275    |         |         |        |

|      |                                      |     |         |         |         |         |         |         |         |         |         |         |         |         |         |         |         |         |         |         |         |         |
|------|--------------------------------------|-----|---------|---------|---------|---------|---------|---------|---------|---------|---------|---------|---------|---------|---------|---------|---------|---------|---------|---------|---------|---------|
| 1466 | BPSL1368                             | 30  | 826439  | 825549  | 704337  | 703447  | 709731  | 708841  | 820989  | 820099  | 937059  | 936169  | 589119  | 590009  | 572003  | 571113  | 697890  | 696985  | 1281218 | 1280328 | 779074  | 778184  |
| 1467 | BPSL1369                             | 30  | 826504  | 827574  | 704402  | 705472  | 709796  | 710866  | 821054  | 822124  | 937124  | 938194  | 589054  | 587984  | 572068  | 573138  | 697955  | 699025  | 1281283 | 1282353 | 779139  | 780209  |
| 1468 | BPSL1370                             | 30  | 827603  | 828265  | 705501  | 706163  | 710895  | 711557  | 822153  | 822815  | 938223  | 938885  | 587955  | 587293  | 573167  | 573829  | 699054  | 699716  | 1282382 | 1283044 | 780238  | 780900  |
| 1469 | BPSL1371                             | 30  | 828948  | 828694  | 706846  | 706592  | 712240  | 711986  | 823498  | 823244  | 939568  | 939314  | 586610  | 586864  | 574512  | 574258  | 700399  | 700145  | 1283727 | 1283473 | 781583  | 781329  |
| 1470 | BPSL1372                             | 30  | 829884  | 829627  | 707782  | 707525  | 713176  | 712919  | 824434  | 824177  | 940504  | 940247  | 585674  | 585931  | 575448  | 575191  | 701335  | 701078  | 1284663 | 1284406 | 782519  | 782262  |
| 1471 | BPSL1373                             | 30  | 830291  | 829884  | 708189  | 707782  | 713583  | 713176  | 824841  | 824434  | 940911  | 940504  | 585267  | 585674  | 575855  | 575448  | 701742  | 701335  | 1285070 | 1284663 | 782926  | 782519  |
| 1472 | BPSL1374                             | 30  | 830853  | 831311  | 708751  | 709209  | 714145  | 714603  | 825403  | 825861  | 941473  | 941931  | 584705  | 584247  | 576417  | 576875  | 702304  | 702762  | 1285632 | 1286090 | 783487  | 783945  |
| 1473 | BPSL1375                             | 30  | 831466  | 832281  | 709364  | 710179  | 714758  | 715573  | 826016  | 826831  | 942086  | 942901  | 584092  | 583277  | 577030  | 577845  | 702917  | 703732  | 1286245 | 1287060 | 784100  | 784915  |
| 1474 | BPSL1376                             | 30  | 832898  | 832638  | 710796  | 710536  | 716190  | 715930  | 827448  | 827188  | 943518  | 943258  | 582660  | 582920  | 578462  | 578202  | 704349  | 704089  | 1287677 | 1287417 | 785532  | 785272  |
| 1475 | BPSL1377                             | 30  | 832973  | 833161  | 710871  | 711059  | 716265  | 716453  | 827523  | 827711  | 943593  | 943781  | 582585  | 582397  | 578537  | 578725  | 704424  | 704612  | 1287752 | 1287940 | 785607  | 785795  |
| 1476 | BPSL1378                             | 30  | 834810  | 833422  | 712708  | 711320  | 718102  | 716714  | 829360  | 827972  | 945430  | 944042  | 580748  | 582136  | 580374  | 578986  | 706261  | 704873  | 1289589 | 1288201 | 787444  | 786056  |
| 1477 | BPSL1379                             | 30  | 835168  | 834821  | 713066  | 712719  | 718460  | 718113  | 829718  | 829371  | 945788  | 945441  | 580390  | 580737  | 580732  | 580385  | 706619  | 706272  | 1289947 | 1289600 | 787802  | 787455  |
| 1478 | BPSL1380                             | 30  | 837067  | 835406  | 714965  | 713304  | 720359  | 718698  | 831617  | 829956  | 947687  | 946026  | 578491  | 580152  | 582631  | 580970  | 708518  | 706857  | 1291846 | 1290185 | 789701  | 788040  |
| 1479 | BPSL1381                             | 30  | 838094  | 837384  | 715992  | 715282  | 721386  | 720676  | 832644  | 831934  | 948714  | 948004  | 577464  | 578174  | 583658  | 582948  | 709545  | 708835  | 1292873 | 1292163 | 790728  | 790018  |
| 1480 | BPSL1382                             | 30  | 839212  | 838382  | 717110  | 716280  | 722504  | 721674  | 833762  | 832932  | 949832  | 949002  | 576346  | 577176  | 584776  | 583946  | 710663  | 709833  | 1293991 | 1293161 | 791846  | 791016  |
| 1481 | Chr1_66_IS407A_A                     |     | 839215  | 840450  | 717113  | 718348  | 722507  | 723742  | 833765  | 835000  | 949835  | 951070  | 575108  | 576343  | 584779  | 586014  | 710666  | 711901  | 1293994 | 1295229 | 791849  | 793084  |
| 1482 | BPSL1383                             |     |         |         |         |         |         |         |         |         |         |         |         |         |         |         |         |         |         |         |         |         |
| 1483 | BPSL1384                             | GI7 |         |         |         |         |         |         |         |         |         |         |         |         |         |         |         |         |         |         |         |         |
| 1484 | BPSL1384a                            | GI7 |         |         |         |         |         |         |         |         |         |         |         |         |         |         |         |         |         |         |         |         |
| 1485 | BPSL1385                             | GI7 |         |         |         |         |         |         |         |         |         |         |         |         |         |         |         |         |         |         |         |         |
| 1486 | BPSL1386                             | GI7 |         |         |         |         |         |         |         |         |         |         |         |         |         |         |         |         |         |         |         |         |
| 1487 | BPSL1387                             | GI7 |         |         |         |         |         |         |         |         |         |         |         |         |         |         |         |         |         |         |         |         |
| 1488 | BPSL1388                             | GI7 |         |         |         |         |         |         |         |         |         |         |         |         |         |         |         |         |         |         |         |         |
| 1489 | BPSL1389                             | GI7 |         |         |         |         |         |         |         |         |         |         |         |         |         |         |         |         |         |         |         |         |
| 1490 | BPSL1390                             | GI7 |         |         |         |         |         |         |         |         |         |         |         |         |         |         |         |         |         |         |         |         |
| 1491 | BPSL1391                             | GI7 |         |         |         |         |         |         |         |         |         |         |         |         |         |         |         |         |         |         |         |         |
| 1492 | BPSL1392                             | GI7 |         |         |         |         |         |         |         |         |         |         |         |         |         |         |         |         |         |         |         |         |
| 1493 | BPSL1393                             | GI7 |         |         |         |         |         |         |         |         |         |         |         |         |         |         |         |         |         |         |         |         |
| 1494 | Chr1_67_IS407A_A                     |     | 1533068 | 1534303 | 1420660 | 1421895 | 1430062 | 1431297 | 1523634 | 1524869 | 1686724 | 1687959 | 3386673 | 3387908 | 1230358 | 1231593 | 1436504 | 1437739 | 1950881 | 1952116 | 1479698 | 1480933 |
| 1495 | BPSL1394                             | 31  | 1531285 | 1531905 | 1418877 | 1419497 | 1428279 | 1428899 | 1521851 | 1522471 | 1684941 | 1685561 | 3389691 | 3389071 | 1228575 | 1229195 | 1434932 | 1435552 | 1949098 | 1949718 | 1477915 | 1478535 |
| 1496 | BPSL1395                             | 31  | 1529939 | 1531087 | 1417531 | 1418679 | 1426933 | 1428081 | 1520505 | 1521653 | 1683595 | 1684743 | 3391031 | 3389889 | 1227235 | 1228377 | 1433592 | 1434734 | 1947752 | 1948900 | 1476563 | 1477717 |
| 1497 | BPSL1396                             | 31  | 1528731 | 1529921 | 1416323 | 1417513 | 1425725 | 1426915 | 1519297 | 1520487 | 1682387 | 1683577 | 3392239 | 3391049 | 1226026 | 1226730 | 1432384 | 1433574 | 1946544 | 1947734 | 1475355 | 1476545 |
| 1498 | BPSL1397                             | 31  | 1527640 | 1528704 | 1415232 | 1416296 | 1424634 | 1425698 | 1518206 | 1519270 | 1681296 | 1682360 | 3393330 | 3392266 | 1224935 | 1225999 | 1431293 | 1432357 | 1945453 | 1946517 | 1474264 | 1475328 |
| 1499 | BPSL1398                             | 31  | 1527309 | 1526164 | 1414901 | 1413756 | 1424303 | 1423158 | 1517875 | 1516730 | 1680965 | 1679820 | 3393661 | 3394806 | 1224604 | 1223459 | 1430962 | 1429817 | 1945123 | 1943978 | 1473934 | 1472789 |
| 1500 | BPSL1399                             | 31  | 1526062 | 1525091 | 1413654 | 1412683 | 1423056 | 1422085 | 1516628 | 1515657 | 1679718 | 1678747 | 3394908 | 3395879 | 1223357 | 1222386 | 1429715 | 1428744 | 1943876 | 1942905 | 1472687 | 1471716 |
| 1501 | BPSL1400                             | 31  | 1524251 | 1524697 | 1411843 | 1412289 | 1421245 | 1421691 | 1514817 | 1515263 | 1677907 | 1678353 | 3396719 | 3396273 | 1221546 | 1221992 | 1427904 | 1428350 | 1942065 | 1942511 | 1470876 | 1471322 |
| 1502 | BPSL1401                             | 31  | 1522985 | 1524145 | 1410577 | 1411737 | 1419979 | 1421139 | 1513551 | 1514711 | 1676641 | 1677801 | 3397985 | 3396825 | 1220280 | 1221440 | 1426638 | 1427798 | 1940799 | 1941959 | 1469610 | 1470770 |
| 1503 | BPSL1402                             | 31  | 1522532 | 1521186 | 1410124 | 1408778 | 1419526 | 1418180 | 1513098 | 1511752 | 1676177 | 1674831 | 3398449 | 3399795 | 1219805 | 1218459 | 1426185 | 1424839 | 1940346 | 1939000 | 1469157 | 1467811 |
| 1504 | BPSL1403                             | 31  | 1521048 | 1520398 | 1408640 | 1407990 | 1418042 | 1417392 | 1511614 | 1510964 | 1674693 | 1674043 | 3399933 | 3400583 | 1218321 | 1217671 | 1424701 | 1424051 | 1938862 | 1938212 | 1467673 | 1467023 |
| 1505 | BPSL1404                             | 31  | 1520255 | 1518966 | 1407847 | 1406558 | 1417249 | 1415960 | 1510821 | 1509532 | 1673900 | 1672611 | 3400726 | 3402015 | 1217528 | 1216239 | 1423908 | 1422619 | 1938069 | 1936780 | 1466880 | 1465591 |
| 1506 | BPSL1405                             | 31  | 1518767 | 1516353 | 1406359 | 1403945 | 1415761 | 1413347 | 1509333 | 1506919 | 1672412 | 1669998 | 3402214 | 3404628 | 1216040 | 1213626 | 1422420 | 1420006 | 1936581 | 1934167 | 1465392 | 1462978 |
| 1507 | BPSL1406                             | 31  | 1515054 | 1515380 | 1402646 | 1402972 | 1412048 | 1412374 | 1505620 | 1505946 | 1668699 | 1669025 | 3405927 | 3405601 | 1212327 | 1212653 | 1418707 | 1419033 | 1932868 | 1933194 | 1461679 | 1462005 |
| 1508 | BPSL1406A                            | 31  | 1514871 | 1514656 | 1402463 | 1402248 | 1411865 | 1411650 | 1505437 | 1505222 | 1668516 | 1668301 | 3406110 | 3406325 | 1212144 | 1211929 | 1418524 | 1418309 | 1932685 | 1932470 | 1461496 | 1461281 |
| 1509 | BPSL1407                             | 31  | 1514578 | 1514165 | 1402170 | 1401757 | 1411572 | 1411159 | 1505144 | 1504731 | 1668223 | 1667810 | 3406403 | 3406816 | 1211851 | 1211438 | 1418231 | 1417818 | 1932392 | 1931979 | 1461203 | 1460790 |
| 1510 | BPSL1408                             | 31  | 1513897 | 1513757 | 1401489 | 1401349 | 1410891 | 1410751 | 1504463 | 1504323 | 1667542 | 1667402 | 3407084 | 3407224 | 1211170 | 1211030 | 1417550 | 1417410 | 1931711 | 1931571 | 1460522 | 1460382 |
| 1511 | BPSL1409_putative deoxyribo nuclease | 31  |         |         |         |         |         |         |         |         |         |         |         |         |         |         |         |         |         |         |         |         |
| 1512 | BPSL1410                             | 31  | 1512104 | 1510173 | 1399696 | 1397765 | 1409098 | 1407167 | 1502670 | 1500739 | 1665757 | 1663826 | 3408853 | 3410784 | 1209385 | 1207454 | 1415733 | 1413802 | 1929894 | 1927963 | 1458753 | 1456822 |
| 1513 | BPSL1411                             | 31  | 1509076 | 1509747 | 1396668 | 1397339 | 1406070 | 1406741 | 1499642 | 1500313 | 1662729 | 1663400 | 3411849 | 3411178 | 1206381 | 1207052 | 1412729 | 1413400 | 1926882 | 1927553 | 1455733 | 1456404 |
| 1514 | BPSL1412                             | 31  | 1509086 | 1508364 | 1396678 | 1395956 | 1406080 | 1405358 | 1499652 | 1498930 | 1662739 | 1662017 | 3411839 | 3412561 | 1206391 | 1205669 | 1412739 | 1412017 | 1926892 | 1926170 | 1455743 | 1455021 |
| 1515 | BPSL1413                             | 31  | 1506391 | 1508010 | 1393983 | 1395602 | 1403385 | 1405004 | 1496957 | 1498576 | 1660028 | 1661647 | 3414534 | 3412915 | 1203728 | 1205347 | 1410068 | 1411687 | 1924189 | 1925808 | 1453040 | 1454659 |
| 1516 | BPSL1414                             | 31  | 1504693 | 1506285 | 1392285 | 1393877 | 1401687 | 1403279 | 1495259 | 1496851 | 1658330 | 1659922 | 3416232 | 3414640 | 1202030 | 1203622 | 1408370 | 1409962 | 1922491 | 1924083 | 1451342 | 1452934 |



|               |    |                  |         |         |         |         |         |         |         |          |         |         |         |         |         |         |         |         |         |         |         |         |
|---------------|----|------------------|---------|---------|---------|---------|---------|---------|---------|----------|---------|---------|---------|---------|---------|---------|---------|---------|---------|---------|---------|---------|
| 1517 BPSL1415 | 31 | 1503341          | 1504642 | 1390933 | 1392234 | 1400335 | 1401636 | 1493907 | 1495208 | 1656978  | 1658279 | 3417584 | 3416283 | 1200678 | 1201979 | 1407018 | 1408319 | 1921139 | 1922440 | 1449990 | 1451291 |         |
| 1518 BPSL1416 | 31 | 1503085          | 1499027 | 1390677 | 1386619 | 1400079 | 1396021 | 1493651 | 1489593 | 1656722  | 1652664 | 3417840 | 3421907 | 1200422 | 1196355 | 1406762 | 1402695 | 1920883 | 1916825 | 1449734 | 1445676 |         |
| 1519 BPSL1417 | 31 | 1499019          | 1498489 | 1386611 | 1386081 | 1396013 | 1395483 | 1489585 | 1489055 | 1652656  | 1652126 | 3421915 | 3422445 | 1196347 | 1195817 | 1402687 | 1402157 | 1916817 | 1916287 | 1445668 | 1445138 |         |
| 1520 BPSL1418 | 31 | 1497609          | 1498385 | 1385201 | 1385977 | 1394603 | 1395379 | 1488175 | 1488951 | 1651246  | 1652022 | 3423325 | 3422549 | 1194937 | 1195713 | 1401277 | 1402053 | 1915407 | 1916183 | 1444258 | 1445034 |         |
| 1521 BPSL1419 | 31 | 1497270          | 1497581 | 1384862 | 1385173 | 1394264 | 1394575 | 1487836 | 1488147 | 1650907  | 1651218 | 3423664 | 3423353 | 1194598 | 1194909 | 1400938 | 1401249 | 1915068 | 1915379 | 1443919 | 1444230 |         |
| 1522 BPSL1420 | 31 | 1496737          | 1497264 | 1384329 | 1384856 | 1393731 | 1394258 | 1487303 | 1487830 | 1650374  | 1650901 | 3424197 | 3423670 | 1194065 | 1194592 | 1400405 | 1400932 | 1914535 | 1915062 | 1443386 | 1443913 |         |
| 1523 BPSL1421 | 31 | 1496213          | 1496641 | 1383805 | 1384233 | 1393207 | 1393635 | 1486779 | 1487207 | 1649850  | 1650278 | 3424721 | 3424293 | 1193541 | 1193969 | 1399881 | 1400309 | 1914011 | 1914439 | 1442862 | 1443290 |         |
| 1524 BPSL1422 | 31 | 1494585          | 1496159 | 1382177 | 1383751 | 1391579 | 1393153 | 1485151 | 1486725 | 1648222  | 1649796 | 3426349 | 3424775 | 1191913 | 1193487 | 1398253 | 1399827 | 1912383 | 1913957 | 1441234 | 1442808 |         |
| 1525 BPSL1423 | 31 | 1494469          | 1492838 | 1382061 | 1380430 | 1391463 | 1389832 | 1485035 | 1483404 | 1648106  | 1646475 | 3426465 | 3428096 | 1191797 | 1190166 | 1398137 | 1396506 | 1912267 | 1910636 | 1441118 | 1439487 |         |
| 1526 BPSL1424 | 31 | 1492583          | 1490502 | 1380175 | 1378094 | 1389577 | 1387496 | 1483149 | 1481068 | 1646220  | 1644139 | 3428351 | 3430432 | 1189911 | 1187830 | 1396251 | 1394170 | 1910381 | 1908300 | 1439232 | 1437151 |         |
| 1527 BPSL1425 | 31 | 1490457          | 1489822 | 1378049 | 1377414 | 1387451 | 1386816 | 1481023 | 1480388 | 1644094  | 1643459 | 3430477 | 3431112 | 1187785 | 1187150 | 1394125 | 1393490 | 1908255 | 1907620 | 1437106 | 1436471 |         |
| 1528 BPSL1426 | 31 | 1489760          | 1488585 | 1377352 | 1376177 | 1386754 | 1385579 | 1480326 | 1479151 | 1643397  | 1642222 | 3431174 | 3432349 | 1187088 | 1185913 | 1393428 | 1392253 | 1907558 | 1906383 | 1436409 | 1435234 |         |
| 1529 BPSL1427 | 31 | 1487684          | 1488205 | 1375276 | 1375797 | 1384678 | 1385199 | 1478250 | 1478771 | 1641321  | 1641842 | 3433250 | 3432729 | 1185003 | 1185524 | 1391352 | 1391873 | 1905482 | 1906003 | 1434333 | 1434854 |         |
| 1530 BPSL1428 | 31 | 1486996          | 1486685 | 1374588 | 1374277 | 1383990 | 1383679 | 1477577 | 1477266 | 1640633  | 1640322 | 3433938 | 3434249 | 1184315 | 1184004 | 1390664 | 1390353 | 1904794 | 1904483 | 1433645 | 1433334 |         |
| 1531 BPSL1429 | 31 | 1486685          | 1486206 | 1374277 | 1373798 | 1383679 | 1383200 | 1477266 | 1476787 | 1640322  | 1639843 | 3434249 | 3434278 | 1184004 | 1183525 | 1390353 | 1389874 | 1904483 | 1904404 | 1433334 | 1432855 |         |
| 1532 BPSL1430 | 31 | 1486111          | 1485116 | 1373703 | 1372708 | 1383105 | 1382110 | 1476692 | 1475697 | 1639748  | 1638753 | 3434823 | 3435818 | 1183430 | 1182435 | 1389779 | 1388784 | 1903909 | 1902914 | 1432760 | 1431765 |         |
| 1533 BPSL1431 | 31 | 1485043          | 1484051 | 1372635 | 1371643 | 1382037 | 1381045 | 1475624 | 1474632 | 1638680  | 1637688 | 3435891 | 3436883 | 1182362 | 1181370 | 1388711 | 1387719 | 1902841 | 1901849 | 1431692 | 1430700 |         |
| 1534 BPSL1432 | 31 | 1483676          | 1483239 | 1371268 | 1370831 | 1380670 | 1380233 | 1474257 | 1473820 | 1637313  | 1636876 | 3437258 | 3437695 | 1180995 | 1180558 | 1387344 | 1386907 | 1901474 | 1901037 | 1430325 | 1429888 |         |
| 1535 BPSL1433 | 31 | 1482349          | 1483197 | 1369941 | 1370789 | 1379343 | 1380191 | 1472930 | 1473778 | 1635986  | 1636834 | 3438585 | 3437737 | 1179668 | 1180516 | 1386017 | 1386865 | 1901047 | 1900995 | 1428998 | 1429846 |         |
| 1536 BPSL1434 | 31 | 1481325          | 1482275 | 1368917 | 1369867 | 1378319 | 1379269 | 1471906 | 1472856 | 1634962  | 1635912 | 3439609 | 3438659 | 1178644 | 1179594 | 1384993 | 1385943 | 1899123 | 1900073 | 1427974 | 1428924 |         |
| 1537 BPSL1435 | 31 | 1481153          | 1480137 | 1368745 | 1367729 | 1378147 | 1377131 | 1471734 | 1470718 | 1634790  | 1633774 | 3439781 | 3440797 | 1178472 | 1177456 | 1384821 | 1383805 | 1898951 | 1897935 | 1427802 | 1426786 |         |
| 1538 BPSL1436 | 31 | 1480133          | 1479516 | 1367725 | 1367108 | 1377127 | 1376510 | 1470714 | 1470097 | 1633770  | 1633153 | 3440801 | 3441418 | 1177452 | 1176835 | 1383801 | 1383184 | 1897931 | 1897314 | 1426782 | 1426165 |         |
| 1539 BPSL1437 | 31 | 1479493          | 1478462 | 1367085 | 1366054 | 1376487 | 1375456 | 1470074 | 1469043 | 1633130  | 1632099 | 3441441 | 3442472 | 1176812 | 1175781 | 1383161 | 1382130 | 1897291 | 1896260 | 1426142 | 1425111 |         |
| 1540 BPSL1438 | 31 | 1478416          | 1477913 | 1366008 | 1365505 | 1375410 | 1374907 | 1468997 | 1468494 | 1632053  | 1631550 | 3442518 | 3443021 | 1175735 | 1175232 | 1382084 | 1381581 | 1896214 | 1895711 | 1425065 | 1424562 |         |
| 1541 BPSL1439 | 31 | 1477834          | 1477028 | 1365426 | 1364620 | 1374828 | 1374022 | 1468415 | 1467609 | 1631471  | 1630665 | 3443100 | 3443906 | 1175153 | 1174347 | 1381502 | 1380696 | 1895632 | 1894826 | 1424483 | 1423677 |         |
| 1542 BPSL1440 | 31 | 1477014          | 1476310 | 1364606 | 1363902 | 1374008 | 1373304 | 1467595 | 1466891 | 1630651  | 1629947 | 3443920 | 3444624 | 1174333 | 1173629 | 1380682 | 1379978 | 1894812 | 1894108 | 1423663 | 1422959 |         |
| 1543 BPSL1441 | 31 | 1476230          | 1475883 | 1363822 | 1363475 | 1373224 | 1372877 | 1466811 | 1466464 | 1629867  | 1629520 | 3444704 | 3445051 | 1173549 | 1173202 | 1379898 | 1379551 | 1894028 | 1893681 | 1422879 | 1422532 |         |
| 1544 BPSL1442 | 31 | 1475813          | 1474629 | 1363405 | 1362221 | 1372807 | 1371623 | 1466394 | 1465210 | 1629450  | 1628266 | 3445121 | 3446305 | 1173132 | 1171948 | 1379481 | 1378297 | 1893611 | 1892427 | 1422462 | 1421278 |         |
| 1545 BPSL1443 | 31 | 1474502          | 1473195 | 1362094 | 1360787 | 1371496 | 1370189 | 1465083 | 1463776 | 1628139  | 1626832 | 3446432 | 3447739 | 1171821 | 1170514 | 1378170 | 1376863 | 1892300 | 1890993 | 1421151 | 1419844 |         |
| 1546 BPSL1444 | 31 | 1472815          | 1471754 | 1360407 | 1359346 | 1369809 | 1368748 | 1463396 | 1462335 | 1626452  | 1625391 | 3448119 | 3449180 | 1170134 | 1169073 | 1376483 | 1375422 | 1890613 | 1889552 | 1419464 | 1418403 |         |
| 1547 BPSL1445 | 31 | 1470957          | 1471541 | 1358549 | 1359133 | 1367951 | 1368535 | 1461538 | 1462122 | 1624594  | 1625178 | 3449977 | 3449393 | 1168276 | 1168860 | 1374625 | 1375209 | 1888755 | 1889339 | 1417606 | 1418190 |         |
| 1548 BPSL1446 | 31 | 1470219          | 1470716 | 1357811 | 1358308 | 1367213 | 1367710 | 1460800 | 1461297 | 1623856  | 1624353 | 3450715 | 3450218 | 1167538 | 1168035 | 1373887 | 1374384 | 1888017 | 1888514 | 1416868 | 1417365 |         |
| 1549 BPSL1447 | 31 | 1469743          | 1470030 | 1357335 | 1357622 | 1366737 | 1367024 | 1460324 | 1460611 | 1623380  | 1623667 | 3451191 | 3450904 | 1167062 | 1167349 | 1373411 | 1373698 | 1887541 | 1887828 | 1416392 | 1416679 |         |
| 1550 BPSL1448 | 31 | 1469245          | 1468205 | 1356837 | 1355797 | 1366239 | 1365199 | 1459826 | 1458786 | 1622882  | 1621842 | 3451689 | 3452729 | 1166564 | 1165524 | 1372913 | 1371873 | 1887043 | 1886003 | 1415894 | 1414854 |         |
| 1551          |    | Chr1_68_IS407A_A | 1466275 | 1467510 | 1353867 | 1355102 | 1363269 | 1364504 | 1456856 | 1458091  | 1619910 | 1621145 | 3453424 | 3454659 | 1163594 | 1164829 | 1369943 | 1371178 | 1884073 | 1885308 | 1412924 | 1414159 |
| 1552 BPSL1449 |    |                  |         |         |         |         |         |         |         |          |         |         |         |         |         |         |         |         |         |         |         |         |
| 1553 BPSL1450 |    |                  |         |         |         |         |         |         |         |          |         |         |         |         |         |         |         |         |         |         |         |         |
| 1554 BPSL1451 |    |                  |         |         |         |         |         |         |         |          |         |         |         |         |         |         |         |         |         |         |         |         |
| 1555 BPSL1452 |    |                  |         |         |         |         |         |         |         |          |         |         |         |         |         |         |         |         |         |         |         |         |
| 1556 BPSL1453 |    |                  |         |         |         |         |         |         |         |          |         |         |         |         |         |         |         |         |         |         |         |         |
| 1557          |    | Chr1_69_IS407A_A | 1466275 | 1467510 | 1353867 | 1355102 | 1363269 | 1364504 | 1456856 | 1458091  | 1109938 | 1111173 | 3453424 | 3454659 | 1163594 | 1164829 | 1369943 | 1371178 | 1884073 | 1885308 | 952619  | 953854  |
| 1558          |    | Chr1_70_IS407A_C |         |         |         |         |         |         |         |          |         |         | 3454610 | 3455717 |         |         |         |         |         |         |         |         |
| 1559 BPSL1454 | 32 | 1465683          | 1466105 | 1353275 | 1353697 | 1362677 | 1363099 | 1456264 | 1456686 | 11111749 | 1111327 | 3456309 | 3455887 | 1163003 | 1163425 | 1369343 | 1369765 | 1883578 | 1884000 | 954469  | 954047  |         |
| 1560 BPSL1455 | 32 | 1464752          | 1465669 | 1352344 | 1353261 | 1361746 | 1362663 | 1455333 | 1456250 | 1112680  | 1111763 | 3457240 | 3456323 | 1162072 | 1162989 | 1368412 | 1369329 | 1882647 | 1883564 | 955400  | 954483  |         |
| 1561 BPSL1456 | 32 | 1464547          | 1463843 | 1352139 | 1351435 | 1361541 | 1360837 | 1455128 | 1454424 | 1112885  | 1113589 | 3457445 | 3458149 | 1161867 | 1161163 | 1368207 | 1367503 | 1882442 | 1881738 | 955605  | 956309  |         |
| 1562 BPSL1457 | 32 | 1463643          | 1462828 | 1351235 | 1350420 | 1360637 | 1359822 | 1454224 | 1453409 | 1113789  | 1114604 | 3458142 | 3458207 | 1160963 | 1160148 | 1367303 | 1366488 | 1881538 | 1880726 | 956509  | 957324  |         |
| 1563 BPSL1458 | 32 | 1462590          | 1462219 | 1350182 | 1349811 | 1359584 | 1359213 | 1453171 | 1452800 | 1114842  | 1115213 | 1194    | 1565    | 1159910 | 1159539 | 1366250 | 1365879 | 1880485 | 1880114 | 957562  | 957933  |         |
| 1564 BPSL1459 | 32 | 1462179          | 1461883 | 1349771 | 1349475 | 1359173 | 1358877 | 1452760 | 1452464 | 1115253  | 1115549 | 1605    | 1901    | 1159499 | 1159203 | 1365839 | 1365543 | 1880074 | 1879778 | 957973  | 958269  |         |
| 1565 BPSL1460 | 32 | 1461877          | 1461605 | 1349469 | 1349197 | 1358871 | 1358599 | 1452458 | 1452186 | 1115555  | 1115827 | 1907    | 2179    | 1159197 | 1158925 | 1365537 | 1365265 | 1879772 | 1879500 | 958275  | 958547  |         |
| 1566 BPSL1461 | 32 | 1461574          | 1461125 | 1349166 | 1348717 | 1358568 | 1358119 | 1452155 | 1451706 | 1115858  | 1116307 | 2201    | 2659    | 11      |         |         |         |         |         |         |         |         |

|               |    |         |         |         |         |         |         |         |         |         |         |       |       |         |         |         |         |         |         |         |         |
|---------------|----|---------|---------|---------|---------|---------|---------|---------|---------|---------|---------|-------|-------|---------|---------|---------|---------|---------|---------|---------|---------|
| 1568 BPSL1463 | 32 | 1459457 | 1458834 | 1347049 | 1346426 | 1356451 | 1355828 | 1450038 | 1449415 | 1117975 | 1118598 | 4327  | 4950  | 1156777 | 1156154 | 1363117 | 1362494 | 1877352 | 1876729 | 960695  | 961318  |
| 1569 BPSL1464 | 32 | 1458820 | 1457813 | 1346412 | 1345405 | 1355814 | 1354807 | 1449401 | 1448394 | 1118612 | 1119619 | 4964  | 5971  | 1156140 | 1155133 | 1362480 | 1361473 | 1876715 | 1875708 | 961332  | 962339  |
| 1570 BPSL1465 | 32 | 1456351 | 1457571 | 1343374 | 1344594 | 1352908 | 1353546 | 1447895 | 1448152 | 1121081 | 1119861 | 7433  | 6213  | 1153671 | 1154891 | 1360011 | 1361231 | 1874246 | 1875466 | 1358703 | 1359923 |
| 1571 BPSL1466 | 32 | 1454720 | 1456108 | 1341743 | 1343131 | 1350385 | 1351224 | 1445587 | 1446975 | 1122712 | 1121324 | 9064  | 7676  | 1152040 | 1153428 | 1358380 | 1359768 | 1872615 | 1874003 | 1357072 | 1358460 |
| 1572 BPSL1467 | 32 | 1453525 | 1453983 | 1340548 | 1341006 | 1349190 | 1349648 | 1444392 | 1444850 | 1123907 | 1123449 | 10259 | 9801  | 1150845 | 1151303 | 1357185 | 1357643 | 1871420 | 1871878 | 1355877 | 1356335 |
| 1573 BPSL1468 | 32 | 1452539 | 1453432 | 1339562 | 1340455 | 1348204 | 1349097 | 1443406 | 1444299 | 1124893 | 1124000 | 11245 | 10352 | 1149859 | 1150752 | 1356199 | 1357092 | 1870434 | 1871327 | 1354891 | 1355784 |
| 1574 BPSL1469 | 32 | 1450524 | 1452521 | 1337547 | 1339544 | 1346189 | 1348186 | 1441391 | 1443388 | 1126908 | 1124911 | 13260 | 11263 | 1147844 | 1149841 | 1354184 | 1356181 | 1868419 | 1870416 | 1352876 | 1354873 |
| 1575 BPSL1471 | 32 | 1449520 | 1450524 | 1336543 | 1337547 | 1345185 | 1346189 | 1440387 | 1441391 | 1127912 | 1126908 | 14264 | 13260 | 1146840 | 1147844 | 1353180 | 1354184 | 1867415 | 1868419 | 1351872 | 1352876 |
| 1576 BPSL1472 | 32 | 1448362 | 1449510 | 1335385 | 1336533 | 1344027 | 1345175 | 1439229 | 1440377 | 1129070 | 1127922 | 15422 | 14274 | 1145682 | 1146830 | 1352022 | 1353170 | 1866257 | 1867405 | 1350714 | 1351862 |
| 1577 BPSL1473 | 32 | 1447864 | 1448232 | 1334887 | 1335255 | 1343529 | 1343897 | 1438731 | 1439099 | 1129568 | 1129200 | 15920 | 15552 | 1145184 | 1145552 | 1351524 | 1351892 | 1865759 | 1866127 | 1350216 | 1350584 |
| 1578 BPSL1474 | 32 | 1446137 | 1447840 | 1333160 | 1334863 | 1341802 | 1343505 | 1437004 | 1438707 | 1131295 | 1129592 | 17647 | 15944 | 1143457 | 1145160 | 1349797 | 1351500 | 1864032 | 1865735 | 1348489 | 1350192 |
| 1579 BPSL1475 | 32 | 1445594 | 1445965 | 1332617 | 1332988 | 1341259 | 1341630 | 1436461 | 1436832 | 1131838 | 1131467 | 18190 | 17819 | 1142914 | 1143285 | 1349254 | 1349625 | 1863489 | 1863860 | 1347946 | 1348317 |
| 1580 BPSL1476 | 32 | 1445255 | 1445064 | 1332278 | 1332087 | 1340920 | 1340729 | 1436122 | 1435931 | 1132177 | 1132368 | 18529 | 18720 | 1142575 | 1142384 | 1348915 | 1348724 | 1863150 | 1862959 | 1347607 | 1347416 |
| 1581 BPSL1477 | 32 | 1443968 | 1442643 | 1330991 | 1329666 | 1339633 | 1338308 | 1434835 | 1433510 | 1133464 | 1134789 | 19816 | 21141 | 1141288 | 1139963 | 1347628 | 1346303 | 1861863 | 1860538 | 1346320 | 1344995 |
| 1582 BPSL1478 | 32 | 1442632 | 1441184 | 1329655 | 1328207 | 1338297 | 1336849 | 1433499 | 1432051 | 1134800 | 1136248 | 21152 | 22600 | 1139952 | 1138504 | 1346292 | 1344844 | 1860527 | 1859079 | 1344984 | 1343536 |
| 1583 BPSL1479 | 32 | 1440441 | 1439116 | 1327137 | 1325812 | 1335397 | 1334072 | 1431284 | 1429959 | 1137061 | 1138386 | 23343 | 24668 | 1137761 | 1136436 | 1343667 | 1342342 | 1858336 | 1857011 | 1342682 | 1341357 |
| 1584 BPSL1480 | 32 | 1439091 | 1438837 | 1325787 | 1325533 | 1334047 | 1333793 | 1429934 | 1429680 | 1138411 | 1138665 | 24693 | 24947 | 1136411 | 1136157 | 1342317 | 1342063 | 1856986 | 1856732 | 1341332 | 1341078 |
| 1585 BPSL1481 | 32 | 1438823 | 1438338 | 1325519 | 1325034 | 1333779 | 1333294 | 1429666 | 1429181 | 1138679 | 1139164 | 24961 | 25446 | 1136143 | 1136568 | 1342049 | 1341564 | 1856718 | 1856233 | 1341064 | 1340579 |
| 1586 BPSL1482 | 32 | 1437471 | 1438010 | 1324167 | 1324706 | 1332427 | 1329666 | 1428314 | 1428853 | 1140031 | 1139492 | 26313 | 25774 | 1134791 | 1135330 | 1340697 | 1341236 | 1855366 | 1855905 | 1339712 | 1340251 |
| 1587 BPSL1483 | 32 | 1437287 | 1436793 | 1323983 | 1323489 | 1332243 | 1331749 | 1428130 | 1427636 | 1140215 | 1140709 | 26497 | 26991 | 1134607 | 1134113 | 1340513 | 1340019 | 1855182 | 1854688 | 1339528 | 1339034 |
| 1588 BPSL1484 | 32 | 1436619 | 1433992 | 1323315 | 1322542 | 1331575 | 1328948 | 1427462 | 1424835 | 1140883 | 1143510 | 27165 | 29792 | 1133939 | 1131312 | 1339845 | 1337218 | 1854514 | 1851887 | 1338860 | 1336233 |
| 1589 BPSL1485 | 32 | 1433328 | 1433747 | 1319811 | 1320230 | 1328284 | 1328703 | 1424171 | 1424590 | 1144174 | 1143755 | 30456 | 30037 | 1130648 | 1131067 | 1336554 | 1336973 | 1851223 | 1851642 | 1335569 | 1335988 |
| 1590 BPSL1486 | 32 | 1432554 | 1433246 | 1319037 | 1319729 | 1327510 | 1328202 | 1423397 | 1424089 | 1144948 | 1144256 | 31230 | 30538 | 1128774 | 1130566 | 1335796 | 1335924 | 1850449 | 1851141 | 1334795 | 1335487 |
| 1591 BPSL1487 | 32 | 1432285 | 1431794 | 1318768 | 1318277 | 1327241 | 1326750 | 1423128 | 1422637 | 1145217 | 1145708 | 31499 | 31990 | 1129605 | 1129114 | 1335527 | 1335036 | 1850180 | 1849689 | 1334516 | 1334025 |
| 1592 BPSL1488 | 32 | 1431842 | 1431447 | 1318325 | 1317930 | 1326798 | 1326403 | 1422685 | 1422290 | 1145660 | 1146055 | 31942 | 32337 | 1129162 | 1128767 | 1335084 | 1334689 | 1849737 | 1849342 | 1334073 | 1333696 |
| 1593 BPSL1489 | 32 | 1429696 | 1431048 | 1316181 | 1317533 | 1324654 | 1326006 | 1420541 | 1421893 | 1147804 | 1146452 | 34086 | 32734 | 1127018 | 1128370 | 1332940 | 1334292 | 1847593 | 1848945 | 1331947 | 1333299 |
| 1594 BPSL1490 | 32 | 1427854 | 1429689 | 1314339 | 1316174 | 1322812 | 1324647 | 1418699 | 1420534 | 1149646 | 1147811 | 35928 | 34093 | 1125176 | 1127011 | 1331098 | 1332933 | 1845751 | 1847586 | 1330105 | 1331940 |
| 1595 BPSL1491 | 32 | 1427457 | 1427717 | 1313942 | 1314202 | 1322415 | 1322675 | 1418302 | 1418562 | 1150043 | 1149783 | 36325 | 36065 | 1124779 | 1125039 | 1330701 | 1330961 | 1845354 | 1845614 | 1329708 | 1329968 |
| 1596 BPSL1492 | 32 | 1426397 | 1427239 | 1312882 | 1313724 | 1321355 | 1322197 | 1417242 | 1418084 | 1151103 | 1150261 | 37385 | 36543 | 1123719 | 1124561 | 1329641 | 1330483 | 1844294 | 1845136 | 1328648 | 1329490 |
| 1597 BPSL1493 | 32 | 1424798 | 1426351 | 1311283 | 1312836 | 1319756 | 1321309 | 1415643 | 1417196 | 1152702 | 1151149 | 38984 | 37431 | 1122120 | 1123673 | 1328042 | 1329595 | 1842695 | 1844248 | 1327049 | 1328602 |
| 1598 BPSL1494 | 32 | 1424301 | 1424798 | 1310786 | 1311283 | 1319259 | 1319756 | 1415146 | 1415643 | 1153199 | 1152702 | 39481 | 38984 | 1121623 | 1122120 | 1327545 | 1328042 | 1842198 | 1842695 | 1326552 | 1327049 |
| 1599 BPSL1495 | 32 | 1422902 | 1424161 | 1309387 | 1310646 | 1317860 | 1319119 | 1413747 | 1415006 | 1154598 | 1153339 | 40880 | 39621 | 1120224 | 1121483 | 1326146 | 1327405 | 1840799 | 1842058 | 1325153 | 1326412 |
| 1600 BPSL1496 | 32 | 1422713 | 1422835 | 1309198 | 1309320 | 1317671 | 1317793 | 1413558 | 1413680 | 1154787 | 1154665 | 41069 | 40947 | 1120035 | 1120157 | 1325957 | 1326079 | 1840610 | 1840732 | 1324964 | 1325086 |
| 1601 BPSL1497 | 32 | 1422380 | 1422703 | 1308865 | 1309188 | 1317338 | 1317661 | 1413225 | 1413548 | 1155120 | 1154797 | 41402 | 41079 | 1119702 | 1120025 | 1325624 | 1325947 | 1840277 | 1840600 | 1324631 | 1324954 |
| 1602 BPSL1498 | 32 | 1421716 | 1419242 | 1308201 | 1306906 | 1316674 | 1315157 | 1411179 | 1410487 | 1155784 | 1158258 | 42066 | 44540 | 1119038 | 1116564 | 1323466 | 1322777 | 1839613 | 1837139 | 1323967 | 1322717 |
| 1603 BPSL1499 | 32 | 1419142 | 1418819 | 1305423 | 1305100 | 1313355 | 1313032 | 1410387 | 1410064 | 1158358 | 1158681 | 44640 | 44963 | 1116464 | 1116141 | 1322677 | 1322354 | 1837039 | 1836716 | 1321231 | 1320908 |
| 1604 BPSL1500 | 32 | 1418790 | 1418185 | 1305071 | 1304466 | 1313003 | 1312398 | 1410035 | 1409430 | 1158710 | 1159315 | 44992 | 45597 | 1116112 | 1115507 | 1322325 | 1321720 | 1836687 | 1836802 | 1320879 | 1320457 |
| 1605 BPSL1501 | 32 | 1418112 | 1416910 | 1304393 | 1303191 | 1312325 | 1311123 | 1409357 | 1408155 | 1159388 | 1160590 | 45670 | 46872 | 1115434 | 1114232 | 1321647 | 1320445 | 1836009 | 1834807 | 1320200 | 1318998 |
| 1606 BPSL1502 | 32 | 1416802 | 1416044 | 1303083 | 1302325 | 1311015 | 1310257 | 1408047 | 1407289 | 1160698 | 1161471 | 46980 | 47738 | 1114124 | 1113366 | 1320337 | 1319579 | 1834699 | 1833941 | 1318890 | 1318132 |
| 1607 BPSL1503 | 32 | 1416044 | 1415079 | 1302325 | 1301360 | 1310257 | 1309292 | 1407289 | 1406324 | 1161471 | 1162436 | 47738 | 48703 | 1113366 | 1112401 | 1319579 | 1318614 | 1833941 | 1832976 | 1318132 | 1317167 |
| 1608 BPSL1504 | 32 | 1415070 | 1414177 | 1301351 | 1300458 | 1309283 | 1308390 | 1406315 | 1405422 | 1162445 | 1163338 | 48712 | 49605 | 1112392 | 1111499 | 1318605 | 1317712 | 1832967 | 1832074 | 1317158 | 1316265 |
| 1609 BPSL1505 | 32 | 1414162 | 1413086 | 1300443 | 1299367 | 1308375 | 1307299 | 1405407 | 1404331 | 1163353 | 1164429 | 49620 | 50696 | 1111484 | 1110408 | 1317697 | 1316621 | 1832059 | 1830993 | 1316250 | 1315174 |
| 1610 BPSL1506 | 32 | 1413075 | 1412302 | 1299356 | 1298583 | 1307288 | 1306515 | 1404320 | 1403547 | 1164440 | 1165213 | 50707 | 51480 | 1110397 | 1109624 | 1316610 | 1315837 | 1830972 | 1830199 | 1315163 | 1314390 |
| 1611 BPSL1507 | 32 | 1411265 | 1412122 | 1297546 | 1298403 | 1305478 | 1306335 | 1402510 | 1403367 | 1166250 | 1165393 | 52517 | 51660 | 1108587 | 1109444 | 1314800 | 1315657 | 1829162 | 1830019 | 1313353 | 1314210 |
| 1612 BPSL1508 | 32 | 1411187 | 1409793 | 1297468 | 1296074 | 1305400 | 1304006 | 1402432 | 1401038 | 1166328 | 1167722 | 52595 | 53989 | 1108509 | 1107115 | 1314722 | 1313328 | 1829084 | 1827990 | 1313275 | 1311881 |
| 1613 BPSL1509 | 32 | 1409003 | 1409713 | 1295284 | 1295994 | 1303216 | 1303926 | 1400248 | 1400958 | 1168512 | 1167802 | 54779 | 54069 | 1106325 | 1107035 | 1312538 | 1313248 | 1826900 | 1827610 | 1311091 | 1311801 |
| 1614 BPSL1510 | 32 | 1408769 | 1408347 | 1295050 | 1294628 | 1302982 | 1302560 | 1400014 | 1399592 | 1168746 | 1169168 | 55013 | 55435 | 1106091 | 1105669 | 1312304 | 1311882 | 18      |         |         |         |



|      |          |    |                  |         |         |         |         |         |         |         |         |         |         |        |         |         |         |         |         |         |         |         |         |
|------|----------|----|------------------|---------|---------|---------|---------|---------|---------|---------|---------|---------|---------|--------|---------|---------|---------|---------|---------|---------|---------|---------|---------|
| 1619 | BPSL1515 | 32 | 1403130          | 1402504 | 1289411 | 1288785 | 1297343 | 1296717 | 1394375 | 1393749 | 1174385 | 1175011 | 60652   | 61278  | 1100452 | 1099826 | 1306665 | 1306039 | 1821027 | 1820401 | 1305218 | 1304592 |         |
| 1620 | BPSL1516 | 32 | 1402456          | 1401314 | 1288737 | 1287595 | 1296669 | 1295527 | 1393701 | 1392559 | 1175059 | 1176201 | 61326   | 62468  | 1099778 | 1098636 | 1305991 | 1304849 | 1820353 | 1819211 | 1304544 | 1303402 |         |
| 1621 | BPSL1517 | 32 | 1401036          | 1399702 | 1287317 | 1285983 | 1295249 | 1293915 | 1392281 | 1390947 | 1176479 | 1177813 | 62746   | 64080  | 1098358 | 1097024 | 1304571 | 1303237 | 1818933 | 1817599 | 1303124 | 1301790 |         |
| 1622 | BPSL1518 | 32 | 1399564          | 1399328 | 1285845 | 1285609 | 1293777 | 1293541 | 1390809 | 1390573 | 1177951 | 1178187 | 64218   | 64454  | 1096886 | 1096650 | 1303099 | 1302863 | 1817461 | 1817225 | 1301652 | 1301416 |         |
| 1623 | BPSL1519 | 32 | 1399268          | 1398093 | 1285549 | 1284374 | 1293481 | 1292306 | 1390513 | 1389338 | 1178247 | 1179422 | 64514   | 65689  | 1096590 | 1095415 | 1302803 | 1301628 | 1817165 | 1815990 | 1301356 | 1300181 |         |
| 1624 | BPSL1520 | 32 | 1398044          | 1396698 | 1284325 | 1282979 | 1292257 | 1290911 | 1389289 | 1387943 | 1179471 | 1180817 | 65738   | 67084  | 1095366 | 1094020 | 1301579 | 1300233 | 1815941 | 1814595 | 1300132 | 1298792 |         |
| 1625 | BPSL1521 | 32 | 1396678          | 1395782 | 1282959 | 1282063 | 1290891 | 1289995 |         |         | 1180837 | 1181733 | 67104   | 68000  | 1094000 | 1093104 | 1300213 | 1299317 | 1814575 | 1813679 | 1298753 | 1297866 |         |
| 1626 | BPSL1522 | 32 | 1395754          | 1395566 | 1282035 | 1281847 | 1289967 | 1289779 | 1387140 | 1386952 | 1181761 | 1181949 | 68028   | 68216  | 1093076 | 1092888 | 1299289 | 1299101 | 1813651 | 1813463 | 1297838 | 1297650 |         |
| 1627 | BPSL1523 | 32 | 1395451          | 1394306 | 1281732 | 1280587 | 1289664 | 1288519 | 1386837 | 1385692 | 1182064 | 1183209 | 68331   | 69476  | 1092773 | 1091628 | 1298986 | 1297841 | 1813348 | 1812203 | 1297535 | 1296390 |         |
| 1628 | BPSL1524 | 32 | 1394178          | 1392835 | 1280459 | 1279116 | 1288391 | 1287048 | 1385564 | 1384221 | 1183337 | 1184680 | 69604   | 70947  | 1091500 | 1090157 | 1297713 | 1296370 | 1812075 | 1810732 | 1296262 | 1294919 |         |
| 1629 | BPSL1525 | 32 | 1392795          | 1392235 | 1279076 | 1278516 | 1287008 | 1286448 | 1384181 | 1383621 | 1184720 | 1185280 | 70987   | 71547  | 1091017 | 1089557 | 1296330 | 1295770 | 1810692 | 1810132 | 1294879 | 1294319 |         |
| 1630 | BPSL1526 | 32 | 1391941          | 1390052 | 1278222 | 1276333 | 1286154 | 1284265 | 1383327 | 1381438 | 1185574 | 1187463 | 71841   | 73730  | 1089263 | 1087374 | 1295476 | 1293587 | 1809838 | 1807949 | 1294025 | 1292136 |         |
| 1631 | BPSL1527 | 32 | 1387490          | 1389811 | 1273771 | 1276092 | 1281703 | 1284024 | 1378876 | 1381197 | 1190025 | 1187704 | 76292   | 73971  | 1084812 | 1087133 | 1291025 | 1293346 | 1805387 | 1807708 | 1289574 | 1291895 |         |
| 1632 | BPSL1528 | 32 | 1387152          | 1386604 | 1273433 | 1272885 | 1281365 | 1280817 | 1378538 | 1377990 | 1190363 | 1190911 | 76630   | 77178  | 1084474 | 1083926 | 1290687 | 1290139 | 1805049 | 1804501 | 1289236 | 1288688 |         |
| 1633 | BPSL1529 | 32 | 1386507          | 1386280 | 1272788 | 1272561 | 1280720 | 1280493 | 1377893 | 1377666 | 1191008 | 1191235 | 77275   | 77502  | 1083829 | 1083602 | 1290042 | 1289815 | 1804404 | 1804177 | 1288591 | 1288364 |         |
| 1634 | BPSL1530 | 32 | 1386016          | 1383959 | 1272297 | 1270240 | 1280229 | 1278172 | 1377402 | 1375345 | 1191499 | 1193556 | 77766   | 79823  | 1083338 | 1081281 | 1289551 | 1287494 | 1803913 | 1801856 | 1288100 | 1286043 |         |
| 1635 | BPSL1531 | 32 | 1382956          | 1383777 | 1269237 | 1270058 | 1277169 | 1277990 | 1374342 | 1375163 | 1194559 | 1193738 | 80826   | 80005  | 1080278 | 1081099 | 1286491 | 1287312 | 1800853 | 1801674 | 1285040 | 1285861 |         |
| 1636 | BPSL1532 | 32 | 1382722          | 1381718 | 1269003 | 1267999 | 1276935 | 1275931 | 1374108 | 1373104 | 1194793 | 1195797 | 81060   | 82064  | 1080044 | 1079040 | 1286257 | 1285253 | 1800619 | 1799615 | 1284820 | 1283996 |         |
| 1637 | BPSL1533 | 32 | 1381702          | 1380875 | 1267983 | 1267156 | 1275915 | 1275088 | 1373088 | 1372261 | 1195813 | 1196640 | 82080   | 82907  | 1079024 | 1078197 | 1285237 | 1284410 | 1799599 | 1798772 | 1283980 | 1283153 |         |
| 1638 | BPSL1534 | 32 | 1380355          | 1378544 | 1266636 | 1264825 | 1274568 | 1272757 | 1371741 | 1369930 | 1197160 | 1198971 | 83427   | 85238  | 1077677 | 1075866 | 1283890 | 1282079 | 1798252 | 1796441 | 1282633 | 1282256 |         |
| 1639 | BPSL1535 | 32 | 1378444          | 1377266 | 1264725 | 1263547 | 1272657 | 1271479 | 1369830 | 1368652 | 1199071 | 1200249 | 85338   | 86516  | 1075766 | 1074588 | 1281979 | 1280801 | 1796341 | 1795163 | 1280720 | 1279542 |         |
| 1640 | BPSL1536 | 32 | 1377137          | 1376400 | 1263418 | 1262681 | 1271350 | 1270613 | 1368523 | 1367786 | 1200378 | 1201115 | 86645   | 87382  | 1074459 | 1073722 | 1280672 | 1279935 | 1795034 | 1794297 | 1279413 | 1278676 |         |
| 1641 | BPSL1537 | 32 | 1376260          | 1375691 | 1262541 | 1261972 | 1270473 | 1269904 | 1367646 | 1367077 | 1201255 | 1201824 | 87522   | 88091  | 1073582 | 1073013 | 1279795 | 1279226 | 1794157 | 1793588 | 1278536 | 1277967 |         |
| 1642 | BPSL1538 | 32 | 1375105          | 1373729 | 1261386 | 1260010 | 1269318 | 1267942 | 1366491 | 1365115 | 1202410 | 1203786 | 88677   | 90053  | 1072427 | 1071051 | 1278640 | 1277264 | 1793002 | 1791626 | 1277381 | 1276005 |         |
| 1643 | BPSL1539 | 32 | 1373723          | 1372800 | 1260004 | 1259081 | 1267936 | 1267013 | 1365109 | 1364186 | 1203792 | 1204715 | 90059   | 90982  | 1071045 | 1070122 | 1277258 | 1276335 | 1791620 | 1790697 | 1275999 | 1275076 |         |
| 1644 | BPSL1540 | 32 | 1372701          | 1371520 | 1258982 | 1257801 | 1266914 | 1265733 | 1364087 | 1362906 | 1204814 | 1205995 | 91081   | 92262  | 1070023 | 1068842 | 1276236 | 1275055 | 1790598 | 1789417 | 1274977 | 1273946 |         |
| 1645 | BPSL1541 | 32 | 1371500          | 1370922 | 1257781 | 1257203 | 1265713 | 1265135 | 1362886 | 1362308 | 1206015 | 1206593 | 92282   | 92860  | 1068822 | 1068244 | 1275035 | 1274457 | 1789397 | 1788819 | 1273843 | 1273421 |         |
| 1646 | BPSL1542 | 32 | 1370618          | 1369437 | 1256899 | 1255718 | 1264831 | 1263650 | 1362004 | 1360823 | 1206897 | 1208078 | 93164   | 94345  | 1067940 | 1066759 | 1274153 | 1272972 | 1788551 | 1787370 | 1273153 | 1271972 |         |
| 1647 | BPSL1543 | 32 | 1368325          | 1369167 | 1254606 | 1255448 | 1262538 | 1263380 | 1359711 | 1360553 | 1209190 | 1208348 | 95457   | 94615  | 1065647 | 1066489 | 1271860 | 1272702 | 1786258 | 1787100 | 1270860 | 1271702 |         |
| 1648 | BPSL1544 | 32 | 1367472          | 1366930 | 1253753 | 1253211 | 1261685 | 1261143 | 1358858 | 1358316 | 1210035 | 1210577 | 96308   | 96850  | 1064787 | 1064245 | 1270970 | 1270431 | 1785367 | 1784825 | 1269982 | 1269440 |         |
| 1649 | BPSL1545 | 32 | 1365525          | 1366340 | 1251806 | 1252621 | 1259738 | 1260553 | 1356911 | 1357726 | 1212080 | 1211265 | 98339   | 97524  | 1062721 | 1063536 | 1268942 | 1269757 | 1783392 | 1784207 | 1267965 | 1268780 |         |
| 1650 | BPSL1546 | 32 | 1364833          | 1365525 | 1251114 | 1251806 | 1259046 | 1259738 | 1356219 | 1356911 | 1212772 | 1212080 | 99031   | 98339  | 1062029 | 1062721 | 1268250 | 1268942 | 1782700 | 1783392 | 1267273 | 1267965 |         |
| 1651 | BPSL1547 | 32 | 1364699          | 1362210 | 1250980 | 1248491 | 1258912 | 1256423 | 1356085 | 1353596 | 1212906 | 1215395 | 99165   | 101654 | 1061895 | 1059406 | 1268116 | 1267460 | 1782566 | 1780077 | 1267139 | 1266650 |         |
| 1652 | BPSL1548 | 32 | 1361749          | 1360160 | 1248030 | 1246441 | 1255962 | 1254373 | 1353135 | 1351546 | 1215856 | 1217445 | 102115  | 103704 | 1058945 | 1057356 | 1265248 | 1263659 | 1779616 | 1778027 | 1264189 | 1262600 |         |
| 1653 | BPSL1549 | 32 | 1359376          | 1360008 | 1245657 | 1246289 | 1253589 | 1254221 | 1350762 | 1351394 | 1218229 | 1217597 | 104488  | 103856 | 1056572 | 1057204 | 1262875 | 1263507 | 1777243 | 1777875 | 1261816 | 1262448 |         |
| 1654 | BPSL1550 | 32 | 1359060          | 1357627 | 1245341 | 1243908 | 1253273 | 1251840 | 1350446 | 1349013 | 1218545 | 1219978 | 104804  | 106237 | 1056256 | 1054823 | 1262559 | 1261126 | 1776927 | 1775494 | 1261500 | 1260067 |         |
| 1655 | BPSL1551 | 32 | 1357425          | 1356238 | 1243706 | 1242519 | 1251638 | 1250451 | 1348811 | 1347624 | 1220180 | 1221367 | 106439  | 107626 | 1054621 | 1053434 | 1260924 | 1260802 | 1775292 | 1774105 | 1259865 | 1258678 |         |
| 1656 | BPSL1552 | 32 | 1356162          | 1355521 | 1242443 | 1241802 | 1250375 | 1249734 | 1347548 | 1346907 | 1221443 | 1222084 | 107702  | 108343 | 1053358 | 1052717 | 1259660 | 1259019 | 1774029 | 1773388 | 1258602 | 1257961 |         |
| 1657 | BPSL1553 | 32 | 1355189          | 1355389 | 1241470 | 1241670 | 1249402 | 1249602 | 1346575 | 1346775 | 1222416 | 1222216 | 108675  | 108475 | 1052385 | 1052585 | 1258687 | 1258887 | 1773056 | 1773256 | 1257629 | 1257829 |         |
| 1658 | BPSL1554 | 32 | 1353471          | 1354775 | 1239752 | 1241056 | 1247684 | 1248988 | 1344857 | 1346161 | 1224127 | 1222823 | 110393  | 109089 | 1050667 | 1051971 | 1256969 | 1258273 | 1771338 | 1772642 | 1255911 | 1257215 |         |
| 1659 | BPSL1555 | 32 | 1353084          | 1351993 | 1239365 | 1238274 | 1247297 | 1246206 | 1344470 | 1343379 | 1224514 | 1225605 | 110780  | 111871 | 1050280 | 1049189 | 1256582 | 1255491 | 1770951 | 1769860 | 1255524 | 1254433 |         |
| 1660 | BPSL1556 | 32 | 1351875          | 1350742 | 1238156 | 1237023 | 1246088 | 1244955 | 1343261 | 1342128 | 1225723 | 1226856 | 111989  | 113122 | 1049071 | 1047938 | 1255373 | 1254240 | 1769742 | 1768609 | 1254315 | 1253182 |         |
| 1661 | BPSL1557 | 32 | 1350742          | 1349816 | 1237023 | 1236097 | 1244955 | 1244029 | 1342128 | 1341202 | 1226856 | 1227782 | 113122  | 114048 | 1047938 | 1047012 | 1254240 | 1253314 | 1768609 | 1767683 | 1253182 | 1252256 |         |
| 1662 | BPSL1558 | 32 | 1349816          | 1349001 | 1236097 | 1235282 | 1244029 | 1243214 | 1341202 | 1340387 | 1227782 | 1228597 | 114048  | 114863 | 1047012 | 1046197 | 1253314 | 1252499 | 1767683 | 1766868 | 1252256 | 1251441 |         |
| 1663 | BPSL1559 | 32 | 1348585          | 1348743 | 1234866 | 1235024 | 1242798 | 1242956 | 1339971 | 1340129 | 1229013 | 1228855 | 115279  | 115121 | 1045781 | 1045939 | 1252083 | 1252241 | 1766452 | 1766610 | 1251025 | 1251183 |         |
| 1664 |          |    | Chr1_71_IS407A_A | 1347348 | 1348583 | 1233629 | 1234864 | 1241561 | 1242796 | 1338734 | 1339969 | 1229015 | 1230250 | 115281 | 116516  | 1044544 | 1045779 | 1250846 | 1252081 | 1765215 | 1766450 | 1249788 | 1251023 |











|               |                  |         |         |         |         |         |         |         |         |         |         |        |        |        |        |         |         |         |         |         |         |
|---------------|------------------|---------|---------|---------|---------|---------|---------|---------|---------|---------|---------|--------|--------|--------|--------|---------|---------|---------|---------|---------|---------|
| 1874 BPSL1766 | 35               | 1212989 | 1212378 | 1093726 | 1093115 | 1104333 | 1103722 | 1205530 | 1204943 | 1407703 | 1408314 | 287244 | 286633 | 873962 | 874573 | 1080809 | 1081420 | 1586952 | 1586341 | 1119690 | 1119079 |
| 1875 BPSL1767 | 35               | 1214254 | 1213073 | 1094991 | 1093810 | 1105598 | 1104417 | 1206652 | 1205759 | 1406396 | 1407619 | 288551 | 287328 | 872655 | 873878 | 1079502 | 1080725 | 1588259 | 1587036 | 1120997 | 1119774 |
| 1876 BPSL1768 | 35               | 1218578 | 1218045 | 1099315 | 1098782 | 1109922 | 1109389 | 1210976 | 1210443 | 1402072 | 1402605 | 292875 | 292342 | 868331 | 868864 | 1075178 | 1075711 | 1592583 | 1592050 | 1125321 | 1124788 |
| 1877 BPSL1769 | 35               | 1219718 | 1218648 | 1100455 | 1099385 | 1111062 | 1109992 | 1212116 | 1211046 | 1400932 | 1402002 | 294015 | 292945 | 867191 | 868261 | 1074038 | 1075108 | 1593723 | 1592653 | 1126461 | 1125391 |
| 1878 BPSL1770 | 35               | 1220901 | 1219843 | 1101638 | 1100580 | 1112245 | 1111187 | 1213299 | 1212241 | 1399749 | 1400807 | 295196 | 294279 | 866010 | 866927 | 1072857 | 1073774 | 1594906 | 1593848 | 1127644 | 1126586 |
| 1879 BPSL1771 | 35               | 1221990 | 1222439 | 1103220 | 1103669 | 1113334 | 1113783 | 1214388 | 1214837 | 1398660 | 1398211 | 296285 | 296734 | 864921 | 864547 | 1071768 | 1071319 | 1595995 | 1596444 | 1129214 | 1129543 |
| 1880 BPSL1772 | 35               | 1222501 | 1223100 | 1103731 | 1104330 | 1113845 | 1114444 | 1214899 | 1215498 | 1398149 | 1397550 | 296796 | 297395 | 864412 | 863813 | 1071257 | 1070658 | 1596506 | 1597105 | 1129649 | 1130248 |
| 1881 BPSL1773 | 35               | 1223108 | 1224721 | 1104338 | 1105951 | 1114452 | 1116065 | 1215506 | 1217119 | 1397542 | 1395929 | 297403 | 299016 | 863805 | 862192 | 1070650 | 1069037 | 1597113 | 1598726 | 1130256 | 1131740 |
| 1882 BPSL1774 | 35               | 1225870 | 1225034 | 1107100 | 1106264 | 1117214 | 1116378 | 1218213 | 1217377 | 1394780 | 1395616 | 300165 | 299329 | 861043 | 861879 | 1067888 | 1068724 | 1599875 | 1599039 | 1132561 | 1131842 |
| 1883 BPSL1775 | 35               | 1228196 | 1225938 | 1109426 | 1107168 | 1119540 | 1117282 | 1220539 | 1218281 | 1392454 | 1394712 | 302491 | 300233 | 858717 | 860975 | 1065562 | 1067820 | 1602201 | 1599943 | 1134887 | 1132629 |
| 1884 BPSL1776 | 35               | 1229599 | 1228196 | 1110829 | 1109426 | 1120943 | 1119540 | 1221942 | 1220539 | 1391051 | 1392454 | 303894 | 302491 | 857314 | 858717 | 1064159 | 1065562 | 1603604 | 1602201 | 1136290 | 1134887 |
| 1885 BPSL1777 | 35               | 1234968 | 1229746 | 1116833 | 1113138 | 1127152 | 1123376 | 1225471 | 1222379 | 1385682 | 1390904 | 309263 | 304041 | 851945 | 857167 | 1058790 | 1064012 | 1608973 | 1603751 | 1140437 | 1138800 |
| 1886 BPSL1778 | 35               | 1244883 | 1234993 | 1126748 | 1116858 | 1137561 | 1130896 | 1235663 | 1227066 | 1375776 | 1385657 | 319169 | 309288 | 842039 | 851920 | 1048884 | 1058765 | 1618888 | 1608998 | 1149991 | 1143674 |
| 1887 BPSL1779 | 35               | 1245455 | 1247197 | 1127320 | 1129062 | 1138133 | 1139875 | 1237375 | 1239117 | 1375204 | 1373462 | 319741 | 321483 | 841467 | 839725 | 1048312 | 1046570 | 1619460 | 1621202 | 1150563 | 1152305 |
| 1888 BPSL1780 | 35               | 1247687 | 1248259 | 1129552 | 1130124 | 1140365 | 1140937 | 1239607 | 1240179 | 1372972 | 1372400 | 321973 | 322545 | 839235 | 838663 | 1046080 | 1045508 | 1621692 | 1622264 | 1152795 | 1153367 |
| 1889 BPSL1781 | 35               | 1249475 | 1248450 | 1131340 | 1130315 | 1142153 | 1141128 | 1241395 | 1240370 | 1371184 | 1372209 | 323852 | 322827 | 837335 | 838360 | 1044208 | 1045233 | 1623480 | 1622455 | 1154583 | 1153558 |
| 1890 BPSL1782 | 35               | 1250446 | 1249643 | 1132311 | 1131508 | 1143124 | 1142321 | 1242366 | 1241563 | 1370213 | 1371016 | 324823 | 324020 | 836364 | 837167 | 1043237 | 1044040 | 1624451 | 1623648 | 1155554 | 1154751 |
| 1891 BPSL1783 | 35               | 1252563 | 1250446 | 1134562 | 1134497 | 1145241 | 1143124 | 1244429 | 1242537 | 1368096 | 1370213 | 326940 | 324823 | 834247 | 836364 | 1041120 | 1043237 | 1626568 | 1624451 | 1157614 | 1155554 |
| 1892 BPSL1784 | 35               | 1253450 | 1252563 | 1135449 | 1134562 | 1146128 | 1145241 | 1245316 | 1244429 | 1367209 | 1368096 | 327827 | 326940 | 833360 | 834247 | 1040233 | 1041120 | 1627455 | 1626568 | 1158642 | 1157755 |
| 1893 BPSL1785 | 35               | 1254504 | 1253491 | 1136503 | 1135490 | 1147182 | 1146169 | 1246370 | 1245357 | 1366155 | 1367168 | 328881 | 327868 | 832306 | 833319 | 1039179 | 1040192 | 1628509 | 1627496 | 1159696 | 1158683 |
| 1894 BPSL1786 | 35               | 1254805 | 1254566 | 1136804 | 1136565 | 1147483 | 1147244 | 1246671 | 1246432 | 1365854 | 1366093 | 329182 | 328943 | 832005 | 832244 | 1038878 | 1039117 | 1628810 | 1628571 | 1159997 | 1159758 |
| 1895 BPSL1787 | 35               | 1255484 | 1254864 | 1137483 | 1136863 | 1148162 | 1147542 | 1247350 | 1246730 | 1365175 | 1365795 | 329861 | 329241 | 831326 | 831946 | 1038199 | 1038819 | 1629489 | 1628869 | 1160676 | 1160056 |
| 1896 BPSL1788 | 35               | 1257385 | 1256642 | 1139294 | 1138641 | 1150710 | 1150573 | 1249264 | 1249112 | 1363286 | 1364029 | 331750 | 331007 | 829437 | 830180 | 1036405 | 1036542 | 1631371 | 1630628 | 1162558 | 1161815 |
| 1897 BPSL1789 | 35               | 1257551 | 1257387 | 1141752 | 1140397 | 1152248 | 1150863 | 1250802 | 1249417 | 1361748 | 1363133 | 333288 | 331903 | 827899 | 829284 | 1034867 | 1036252 | 1632909 | 1631524 | 1164096 | 1162711 |
| 1898 BPSL1790 | 35               | 1260045 | 1258957 | 1142874 | 1141786 | 1153370 | 1152282 | 1251924 | 1250836 | 1360626 | 1361714 | 334410 | 333322 | 826777 | 827865 | 1033745 | 1034833 | 1634031 | 1632943 | 1165218 | 1164130 |
| 1899 BPSL1791 | 35               | 1261276 | 1260275 | 1144105 | 1143104 | 1154601 | 1153600 | 1253155 | 1252154 | 1359395 | 1360396 | 335641 | 334640 | 825546 | 826547 | 1032514 | 1033515 | 1635262 | 1634261 | 1166449 | 1165448 |
| 1900 BPSL1792 | 35               | 1262808 | 1261282 | 1145637 | 1144111 | 1156133 | 1154607 | 1254687 | 1253161 | 1357863 | 1359389 | 337173 | 335647 | 824014 | 825540 | 1030982 | 1032508 | 1636794 | 1635268 | 1167981 | 1166455 |
| 1901 BPSL1793 | 35               | 1263814 | 1262873 | 1146643 | 1145702 | 1157139 | 1156198 | 1255693 | 1254752 | 1356857 | 1357798 | 338179 | 337238 | 823008 | 823949 | 1029976 | 1030917 | 1637800 | 1636859 | 1168987 | 1168046 |
| 1902 BPSL1794 | 35               | 1264935 | 1263922 | 1147764 | 1146751 | 1158260 | 1157247 | 1256814 | 1255801 | 1355736 | 1356749 | 339300 | 338287 | 821887 | 822900 | 1028855 | 1029868 | 1638921 | 1637908 | 1170108 | 1169095 |
| 1903 BPSL1795 | 35               | 1265654 | 1266367 | 1148483 | 1149196 | 1158979 | 1159692 | 1257533 | 1258246 | 1355017 | 1354304 | 340060 | 340773 | 821127 | 820414 | 1028095 | 1027382 | 1639681 | 1640394 | 1170868 | 1171581 |
| 1904 BPSL1796 | 35               | 1266447 | 1267739 | 1149276 | 1150568 | 1159772 | 1161064 | 1258326 | 1259618 | 1354224 | 1352932 | 340853 | 342145 | 820334 | 819042 | 1027302 | 1026010 | 1640474 | 1641766 | 1171661 | 1172953 |
| 1905          | Chr1_78_IS407A_A | 1267713 | 1268948 | 1150542 | 1151777 | 1161038 | 1162273 | 1259592 | 1260734 | 1351723 | 1352958 | 342119 | 343354 | 817833 | 819068 | 1024801 | 1026036 | 1641740 | 1642975 | 1172927 | 1174162 |
| 1906 BPSL1797 | 35               |         |         |         |         |         |         |         |         | 1351249 | 1349492 | 343828 | 345585 | 817359 | 815602 | 1024327 | 1022570 | 1643449 | 1645206 |         |         |
| 1907 BPSL1798 | 35               |         |         |         |         |         |         |         |         | 1348413 | 1349435 | 346664 | 345642 | 814523 | 815545 | 1021491 | 1022513 | 1646285 | 1645263 |         |         |
| 1908 BPSL1799 | 35               |         |         |         |         |         |         |         |         | 1347667 | 1348413 | 347410 | 346664 | 813777 | 814523 | 1020745 | 1021491 | 1647031 | 1646285 |         |         |
| 1909 BPSL1800 | 35               |         |         |         |         |         |         |         |         | 1345119 | 1347584 |        |        |        |        |         |         | 1649571 | 1647106 |         |         |
| 1910 BPSL1801 | 35               |         |         |         |         |         |         |         |         | 1344484 | 1344993 |        |        |        |        |         |         | 1650206 | 1649697 |         |         |
| 1911 BPSL1802 | 35               |         |         |         |         |         |         |         |         | 1341137 | 1342684 |        |        |        |        |         |         | 1653549 | 1652002 |         |         |
| 1912 BPSL1803 | 35               |         |         |         |         |         |         |         |         | 1338015 | 1341137 | 348452 | 347670 | 812735 | 813517 | 1019703 | 1020485 | 1656671 | 1653549 |         |         |
| 1913 BPSL1804 | 35               |         |         |         |         |         |         |         |         | 1336799 | 1337995 | 349668 | 348472 | 811519 | 812715 | 1018502 | 1019683 | 1657887 | 1656691 |         |         |
| 1914 BPSL1805 | 35               |         |         |         |         |         |         |         |         | 1336655 | 1335987 | 349812 | 350480 | 811375 | 810707 | 1018358 | 1017690 | 1658031 | 1658699 |         |         |
| 1915 BPSL1806 | 35               |         |         |         |         |         |         |         |         | 1335701 | 1335102 | 351117 | 352217 | 810070 | 808970 | 1017408 | 1016602 | 1659335 | 1660435 |         |         |
| 1916 BPSL1807 | 35               |         |         |         |         |         |         |         |         | 1334314 | 1335054 | 353005 | 352265 | 808182 | 808922 | 1015814 | 1016554 | 1661223 | 1660483 |         |         |
| 1917 BPSL1808 | 35               |         |         |         |         |         |         |         |         | 1333586 | 1334308 | 353733 | 353011 | 807454 | 808176 | 1015086 | 1015808 | 1661951 | 1661229 |         |         |
| 1918 BPSL1809 | 35               |         |         |         |         |         |         |         |         | 1332372 | 1333184 | 354947 | 354135 | 806240 | 807052 | 1013872 | 1014684 | 1663180 | 1662368 |         |         |
| 1919 BPSL1810 | 35               |         |         |         |         |         |         |         |         | 1331112 | 1332089 | 356207 | 355230 | 804980 | 805957 | 1012612 | 1013589 | 1664440 | 1663463 |         |         |
| 1920 BPSL1811 | 35               |         |         |         |         |         |         |         |         | 1330640 | 1331065 | 356679 | 356254 | 804508 | 804933 | 1012140 | 1012565 | 1664912 | 1664487 |         |         |
| 1921 BPSL1812 | 35               |         |         |         |         |         |         |         |         | 1329653 | 1330483 | 357666 | 356836 | 803521 | 804351 | 1011153 | 1011983 | 1665899 | 1665069 |         |         |
| 1922 BPSL1813 | 35               |         |         |         |         |         |         |         |         | 1328613 | 1329554 | 358706 | 357765 | 802481 | 803422 | 1010113 | 1011054 | 1666939 | 1665998 |         |         |
| 1923 BPSL1814 | 35               |         |         |         |         |         |         |         |         | 1327621 | 1328613 | 359698 | 358706 | 801489 | 802481 | 1008532 | 1009077 | 1667931 | 1666939 |         |         |
| 1924 BPSL1815 | 35               |         |         |         |         |         |         |         |         | 1326059 | 1327621 | 361260 | 359698 | 799927 | 801489 | 1006970 | 1008532 | 1669493 | 1667931 |         |         |

|      |                    |    |         |         |         |         |         |         |         |         |         |         |        |        |        |         |         |         |         |         |         |         |
|------|--------------------|----|---------|---------|---------|---------|---------|---------|---------|---------|---------|---------|--------|--------|--------|---------|---------|---------|---------|---------|---------|---------|
| 1925 | BPSL1816           | 35 |         |         |         |         |         |         |         | 1324827 | 1326059 | 362492  | 361260 | 798695 | 799927 | 1005648 | 1006715 | 1670725 | 1669493 |         |         |         |
| 1926 | BPSL1817           | 35 |         |         |         |         |         |         |         | 1324403 | 1324813 | 362916  | 362506 | 798271 | 798681 | 1005224 | 1005634 | 1671149 | 1670739 |         |         |         |
| 1927 | BPSL1818           | 35 |         |         |         |         |         |         |         | 1323050 | 1324366 | 364269  | 362953 | 796918 | 798234 | 1003871 | 1005187 | 1672502 | 1671186 |         |         |         |
| 1928 | BPSL1819           | 35 |         |         |         |         |         |         |         | 1321834 | 1322883 | 365485  | 364436 | 795702 | 796751 | 1002655 | 1003704 | 1673718 | 1672669 |         |         |         |
| 1929 | BPSL1820           | 35 |         |         |         |         |         |         |         | 1321333 | 1321818 | 366016  | 365501 | 795171 | 795686 | 1002124 | 1002639 | 1674249 | 1673734 |         |         |         |
| 1930 | BPSL1821           | 35 |         |         |         |         |         |         |         | 1321116 | 1321304 | 366233  | 366045 | 794954 | 795142 | 1001907 | 1002095 | 1674466 | 1674278 |         |         |         |
| 1931 | BPSL1822           | 35 |         |         |         |         |         |         |         | 1319575 | 1320543 | 367780  | 366812 | 793407 | 794375 | 1000366 | 1001334 | 1676007 | 1675039 |         |         |         |
| 1932 | BPSL1823           | 35 |         |         |         |         |         |         |         | 1318739 | 1319575 | 368616  | 367780 | 792571 | 793407 | 999530  | 1000366 | 1676843 | 1676007 |         |         |         |
| 1933 | BPSL1824           | 35 |         |         |         |         |         |         |         | 1317142 | 1318185 | 370123  | 369080 | 790983 | 792026 | 997951  | 998994  | 1678431 | 1677388 |         |         |         |
| 1934 | BPSL1825           | 35 |         |         |         |         |         |         |         | 1315585 | 1316886 | 371680  | 370379 | 789426 | 790727 | 996394  | 997695  | 1679988 | 1678687 |         |         |         |
| 1935 | BPSL1826           | 35 |         |         |         |         |         |         |         | 1313589 | 1315112 | 373676  | 372153 | 787430 | 788953 | 994398  | 995921  | 1681984 | 1680461 |         |         |         |
| 1936 | BPSL1827           | 35 |         |         |         |         |         |         |         | 1312168 | 1313430 | 375097  | 373835 | 786009 | 787271 | 992977  | 994239  | 1683405 | 1682143 |         |         |         |
| 1937 | BPSL1828           | 35 |         |         |         |         |         |         |         | 1310122 | 1312041 | 377143  | 375224 | 783963 | 785882 | 990931  | 992850  | 1685451 | 1683532 |         |         |         |
| 1938 | Chr1_79_IS407A_A   |    |         |         |         |         |         |         |         | 1308729 | 1309964 | 377301  | 378536 | 782570 | 783805 | 989538  | 990773  | 1685609 | 1686844 |         |         |         |
| 1939 | BPSL1829           |    |         |         |         |         |         |         |         |         |         |         |        |        |        |         |         |         |         |         |         |         |
| 1940 | BPSL1830           |    |         |         |         |         |         |         |         |         |         |         |        |        |        |         |         |         |         |         |         |         |
| 1941 | BPSL1831           |    |         |         |         |         |         |         |         |         |         |         |        |        |        |         |         |         |         |         |         |         |
| 1942 | BPSL1832           |    |         |         |         |         |         |         |         |         |         |         |        |        |        |         |         |         |         |         |         |         |
| 1943 | BPSL1833           |    |         |         |         |         |         |         |         |         |         |         |        |        |        |         |         |         |         |         |         |         |
| 1944 | BPSL1834           |    |         |         |         |         |         |         |         |         |         |         |        |        |        |         |         |         |         |         |         |         |
| 1945 | Chr1_80_IS407A_A   |    | 1267713 | 1268948 | 1150542 | 1151777 | 1161038 | 1162273 | 1259592 | 1260734 | 1308729 | 1309964 | 377301 | 378536 | 782570 | 783805  | 989538  | 990773  | 1685609 | 1686844 | 1172927 | 1174162 |
| 1946 | BPSL1835           | 35 | 1270243 | 1269320 | 1153072 | 1152149 | 1163568 | 1162645 | 1262029 | 1261106 | 1307434 | 1308357 | 379831 | 378908 | 781275 | 782198  | 988243  | 989166  | 1688139 | 1687216 |         |         |
| 1947 | BPSL1836           | 35 | 1271368 | 1270316 | 1154197 | 1153145 | 1164693 | 1163641 | 1263154 | 1262102 | 1306309 | 1307361 | 380956 | 379904 | 780150 | 781202  | 987118  | 988170  | 1689264 | 1688212 |         |         |
| 1948 | BPSL1837           | 35 | 1272260 | 1271385 | 1155089 | 1154214 | 1165585 | 1164710 | 1264046 | 1263171 | 1305417 | 1306292 | 381848 | 380973 | 779258 | 780133  | 986226  | 987101  | 1690156 | 1689281 |         |         |
| 1949 | BPSL1838           | 35 | 1273318 | 1272428 | 1156147 | 1155257 | 1166643 | 1165753 | 1265104 | 1264214 | 1304334 | 1304405 | 382906 | 382016 | 778188 | 779078  | 985144  | 986034  | 1691226 | 1690336 |         |         |
| 1950 | BPSL1839           | 35 | 1274434 | 1273454 | 1157680 | 1156742 | 1168647 | 1167667 | 1266209 | 1265229 | 1303167 | 1304147 | 384022 | 383042 | 777072 | 778052  | 983951  | 984931  | 1692342 | 1691362 | 1176709 | 1175729 |
| 1951 | BPSL1840           | 35 | 1274791 | 1275435 | 1158037 | 1158681 | 1169004 | 1169648 | 1266566 | 1267210 | 1302810 | 1302166 | 384379 | 385023 | 776715 | 776071  | 983594  | 982950  | 1692699 | 1693343 | 1177066 | 1177710 |
| 1952 | BPSL1841           | 35 | 1275501 | 1275824 | 1158747 | 1159070 | 1169714 | 1170037 | 1267276 | 1267599 | 1302100 | 1301777 | 385089 | 385412 | 776005 | 775682  | 982884  | 982561  | 1693409 | 1693732 | 1177776 | 1178099 |
| 1953 | BPSL1842           | 35 | 1275861 | 1276592 | 1159107 | 1159838 | 1170074 | 1170805 | 1267636 | 1268367 | 1301740 | 1301009 | 385449 | 386180 | 775645 | 774914  | 982524  | 981793  | 1693769 | 1694500 | 1178136 | 1178867 |
| 1954 | BPSL1843           | 35 | 1277504 | 1277016 | 1160750 | 1160262 | 1171717 | 1171229 | 1269279 | 1268791 | 1300097 | 1300585 | 387092 | 386604 | 774002 | 774490  | 980881  | 981369  | 1695412 | 1694924 | 1179779 | 1179291 |
| 1955 | Chr1_81_IS407A_B   | 35 | 1277696 | 1278931 | 1160942 | 1162177 | 1171909 | 1173144 | 1269471 | 1270706 | 1298670 | 1299905 |        |        |        |         |         |         |         |         |         |         |
| 1956 | BPSL1844           | 35 | 1278968 | 1279885 | 1162214 | 1162750 | 1173181 | 1174098 | 1270743 | 1271660 | 1298633 | 1297716 | 387316 | 388233 | 773778 | 772861  | 980657  | 979740  | 1695636 | 1696553 | 1180003 | 1180920 |
| 1957 | BPSL1845           | 35 | 1279893 | 1280726 | 1162918 | 1163751 | 1174106 | 1174939 | 1271668 | 1272501 | 1297708 | 1296875 | 388241 | 389074 | 772853 | 772020  | 979732  | 978899  | 1696561 | 1697394 | 1180928 | 1181761 |
| 1958 | BPSL1846           | 35 | 1281305 | 1280811 | 1164330 | 1163836 | 1175518 | 1175024 | 1273080 | 1272586 | 1296296 | 1296790 | 389653 | 389159 | 771441 | 771935  | 978320  | 978814  | 1697973 | 1697479 | 1182340 | 1181846 |
| 1959 | BPSL1847           | 35 | 1282606 | 1281548 | 1165631 | 1164573 | 1176819 | 1175761 | 1274381 | 1273323 | 1294995 | 1296053 | 390954 | 389896 | 770140 | 771198  | 977019  | 978077  | 1699274 | 1698216 | 1183641 | 1182583 |
| 1960 | BPSL1848           | 35 | 1284014 | 1282965 | 1167039 | 1165990 | 1178227 | 1177178 | 1275789 | 1274740 | 1293587 | 1294636 | 392362 | 391313 | 768732 | 769781  | 975611  | 976660  | 1700682 | 1699633 | 1185049 | 1184000 |
| 1961 | BPSL1849           | 35 | 1284736 | 1284293 | 1167761 | 1167318 | 1178949 | 1178506 | 1276511 | 1276068 | 1292865 | 1293308 | 393084 | 392641 | 768010 | 768453  | 974889  | 975332  | 1701404 | 1700961 | 1185771 | 1185328 |
| 1962 | BPSL1850           | 35 | 1284909 | 1285382 | 1167934 | 1168407 | 1179122 | 1179595 | 1276684 | 1277157 | 1292692 | 1292219 | 393257 | 393730 | 767837 | 767364  | 974716  | 974243  | 1701577 | 1702050 | 1185944 | 1186417 |
| 1963 | BPSL1851           | 35 | 1286577 | 1287881 | 1169602 | 1170906 | 1180790 | 1182094 | 1278352 | 1279656 | 1291033 | 1289729 | 394916 | 396220 | 766178 | 764874  | 973057  | 971753  | 1703236 | 1704540 | 1187603 | 1188907 |
| 1964 | BPSL1852           | 35 | 1288473 | 1289489 | 1171498 | 1172514 | 1182686 | 1183702 | 1280248 | 1281264 | 1289137 | 1288121 | 396812 | 397828 | 764282 | 763266  | 971161  | 970145  | 1705123 | 1706139 | 1189490 | 1190506 |
| 1965 | Chr1_82_ISBma1_A   | 35 | 1290138 | 1291176 | 1173163 | 1174201 | 1184351 | 1185389 | 1281913 | 1282951 | 1286434 | 1287472 | 398477 | 399353 | 761741 | 762617  | 968620  | 969496  | 1706788 | 1707664 | 1191155 | 1192031 |
| 1966 | Chr1_83_IS407A_A   | 35 | 1290984 | 1292219 | 1174009 | 1175244 | 1185197 | 1186432 | 1282759 | 1283994 | 1285391 | 1286626 | 399323 | 400558 | 760536 | 761771  | 967415  | 968650  | 1707634 | 1708869 | 1192001 | 1193236 |
| 1967 | Chr1_82-1_ISBma1_A | 35 | 1292202 | 1292680 | 1175227 | 1175705 | 1186415 | 1186893 | 1283977 | 1284455 | 1284930 | 1285408 | 399914 | 401019 | 760075 | 761180  | 966954  | 968059  | 1708804 | 1709330 | 1193171 | 1193697 |
| 1968 | BPSL1853           | 35 | 1293259 | 1293008 | 1176284 | 1176033 | 1187472 | 1187221 | 1285034 | 1284783 | 1284351 | 1284602 | 401598 | 401347 | 759496 | 759747  | 966375  | 966626  | 1709909 | 1709658 | 1195269 | 1195018 |
| 1969 | BPSL1854           | 35 | 1293578 | 1293336 | 1176603 | 1176361 | 1187791 | 1187549 | 1285353 | 1285111 | 1284032 | 1284274 | 401917 | 401675 | 759177 | 759419  | 966056  | 966298  | 1710228 | 1709986 | 1195588 | 1195346 |
| 1970 | BPSL1855           | 35 | 1293875 | 1293663 | 1176900 | 1176688 | 1188088 | 1187876 | 1285650 | 1285438 | 1283735 | 1283947 | 402214 | 402002 | 758880 | 759092  | 965759  | 965971  | 1710525 | 1710313 | 1195885 | 1195673 |
| 1971 | BPSL1856           | 35 | 1294971 | 1293967 | 1177996 | 1176992 | 1189184 | 1188180 | 1286746 | 1285742 | 1282639 | 1283643 | 403310 | 402306 | 757784 | 758788  | 964663  | 965667  | 1711621 | 1710617 | 1196981 | 1195977 |
| 1972 | BPSL1857           | 35 | 1295789 | 1294971 | 1178814 | 1177996 | 1190002 | 1189184 | 1287564 | 1286746 | 1281821 | 1282639 | 404128 | 403310 | 756966 | 757784  | 963845  | 964663  | 1712439 | 1711621 | 1197799 | 1196981 |
| 1973 | BPSL1858           | 35 | 1296964 | 1295810 | 1179989 | 1178835 | 1191177 | 1190023 | 1288739 | 1287585 | 1280646 | 1281800 | 405303 | 404149 | 755791 | 756945  | 962670  | 963824  | 1713614 | 1712460 | 1198974 | 1197820 |
| 1974 | BPSL1859           | 35 | 1297300 | 1297761 | 1180325 | 1180786 | 1191513 | 1191974 | 1289075 | 1289536 | 1280310 | 1289749 | 405639 | 406100 | 755455 | 754994  | 962334  | 961873  | 1713950 | 1714411 | 1199310 | 1199771 |
| 1975 | BPSL1860           | 35 | 1299363 | 1298224 | 1182388 | 1181249 | 1193576 | 1192437 | 1291077 | 1290859 | 1278247 | 1279386 | 407702 | 406563 | 753392 | 754531  | 960265  | 961404  | 1716013 | 1714874 | 1201373 | 1200234 |

|                |    |                    |         |         |         |         |         |         |         |         |         |         |        |         |         |         |         |         |         |         |         |         |
|----------------|----|--------------------|---------|---------|---------|---------|---------|---------|---------|---------|---------|---------|--------|---------|---------|---------|---------|---------|---------|---------|---------|---------|
| 1976 BPSL1861  | 35 | 1299731            | 1299396 | 1182756 | 1182421 | 1193944 | 1193609 | 1291445 | 1291110 | 1277879 | 1278214 | 408070  | 407735 | 753024  | 753359  | 959897  | 960232  | 1716381 | 1716046 | 1201741 | 1201406 |         |
| 1977 BPSL1862  | 35 | 1300233            | 1299739 | 1183258 | 1182764 | 1194446 | 1193952 | 1291947 | 1291453 | 1277377 | 1277871 | 408572  | 408078 | 752522  | 753016  | 959395  | 959889  | 1716883 | 1716389 | 1202243 | 1201749 |         |
| 1978 BPSL1863  | 35 | 1300952            | 1301494 | 1183977 | 1184519 | 1195165 | 1195707 | 1292666 | 1293208 | 1276658 | 1276116 | 409291  | 409833 | 751803  | 751261  | 958676  | 958134  | 1717602 | 1718144 | 1202962 | 1203504 |         |
| 1979 BPSL1864  | 35 | 1301506            | 1302270 | 1184531 | 1185295 | 1195719 | 1196483 | 1293220 | 1293984 | 1276104 | 1275340 | 409845  | 410609 | 751249  | 750485  | 958122  | 957358  | 1718156 | 1718920 | 1203516 | 1204280 |         |
| 1980 BPSL1865  | 35 | 1302307            | 1303134 | 1185332 | 1186159 | 1196520 | 1197347 | 1294021 | 1294848 | 1275303 | 1274476 | 410646  | 411473 | 750448  | 749621  | 957321  | 956494  | 1718957 | 1719784 | 1204317 | 1205144 |         |
| 1981 BPSL1866  | 35 | 1303242            | 1304267 | 1186267 | 1187292 | 1197455 | 1198480 | 1294956 | 1295981 | 1274368 | 1273343 | 411581  | 412606 | 749513  | 748488  | 956386  | 955361  | 1719892 | 1720917 | 1205252 | 1206277 |         |
| 1982 BPSL1867  | 35 | 1304390            | 1305181 | 1187415 | 1188206 | 1198603 | 1199394 | 1296104 | 1296895 | 1273220 | 1272429 | 412729  | 413520 | 748365  | 747574  | 955238  | 954447  | 1721040 | 1721831 | 1206400 | 1207191 |         |
| 1983 BPSL1868  | 35 | 1305314            | 1305970 | 1188339 | 1188995 | 1199527 | 1200183 | 1297028 | 1297684 | 1272296 | 1271640 | 413653  | 414309 | 747441  | 746785  | 954314  | 953658  | 1721964 | 1722620 | 1207324 | 1207980 |         |
| 1984           |    | Chr1_84a_IS407A_A  | 1306102 | 1307337 | 1189127 | 1190362 | 1200315 | 1201550 | 1297816 | 1299051 | 1270273 | 1271508 | 414441 | 415676  | 745418  | 746653  | 952291  | 953526  | 1722752 | 1723987 | 1209165 | 1210140 |
| 1985           |    | Chr1_84b_IS407A_A  |         |         |         |         |         |         |         |         |         | 156544  | 157465 | 1003311 | 1004546 | 1210321 | 1211556 |         |         |         |         |         |
| 1986 BPSL1869  | 36 | 1308468            | 1307488 | 1191493 | 1190513 | 1202681 | 1201701 | 1300182 | 1299202 | 1269142 | 1270122 | 155413  | 156393 | 1005677 | 1004697 | 1212687 | 1211707 | 1725118 | 1724138 | 1211271 | 1210291 |         |
| 1987 BPSL1870  | 36 | 1309281            | 1308571 | 1192306 | 1191596 | 1203494 | 1202784 | 1300995 | 1300285 | 1268329 | 1269039 | 154600  | 155310 | 1006490 | 1005780 | 1213500 | 1212790 | 1725931 | 1725221 | 1212084 | 1211374 |         |
| 1988 BPSL1871  | 36 | 1310314            | 1309622 | 1193339 | 1192647 | 1204527 | 1203835 | 1302028 | 1301336 | 1267296 | 1267988 | 153567  | 154259 | 1007523 | 1006831 | 1214533 | 1213841 | 1726964 | 1726272 | 1213117 | 1212425 |         |
| 1989 BPSL1872  | 36 | 1311482            | 1310586 | 1194507 | 1193611 | 1205695 | 1204799 | 1303196 | 1302300 | 1266128 | 1267024 | 152399  | 153295 | 1008691 | 1007795 | 1215701 | 1214805 | 1728132 | 1727236 | 1214285 | 1213389 |         |
| 1990 BPSL1873  | 36 | 1312599            | 1311859 | 1195624 | 1194884 | 1206812 | 1206072 | 1304313 | 1303573 | 1265011 | 1264751 | 151282  | 152022 | 1009808 | 1009068 | 1216818 | 1216078 | 1729244 | 1728504 | 1215397 | 1214657 |         |
| 1991 BPSL1874  | 36 | 1315265            | 1312734 | 1198290 | 1195759 | 1209478 | 1206947 | 1306979 | 1304448 | 1262345 | 1264876 | 148616  | 151147 | 1012474 | 1009943 | 1219484 | 1216953 | 1731910 | 1729379 | 1218063 | 1215532 |         |
| 1992           |    | Chr1_85_IS8ma2_A   | 1315507 | 1317079 | 1198532 | 1200104 | 1209720 | 1211292 | 1307221 | 1308793 | 1260531 | 1262103 | 146802 | 148374  | 1012716 | 1014290 | 1219726 | 1221298 | 1732152 | 1733022 | 1218305 | 1219877 |
| 1993           |    | Chr1_86_IS407A_C   |         |         |         |         |         |         |         |         |         |         |        |         |         |         |         | 1733018 | 1734253 |         |         |         |
| 1994           |    | Chr1_85-1_IS8ma2_A |         |         |         |         |         |         |         |         |         |         |        |         |         |         |         | 1733431 | 1734964 |         |         |         |
| 1995 BPSL1875  | 36 | 1319208            | 1317499 | 1202233 | 1200524 | 1213421 | 1211712 | 1310922 | 1309213 | 1258402 | 1260111 | 144673  | 146382 | 1016419 | 1014710 | 1223427 | 1221718 | 1737093 | 1735384 | 1222006 | 1220297 |         |
| 1996 BPSL1876  | 36 | 1319710            | 1321227 | 1202735 | 1203745 | 1213923 | 1215440 | 1311424 | 1312941 | 1257900 | 1256383 | 144171  | 142654 | 1016921 | 1018438 | 1223929 | 1225446 | 1737595 | 1739112 | 1222508 | 1224025 |         |
| 1997 BPSL1877  | 36 | 1321517            | 1323040 | 1205111 | 1206634 | 1215730 | 1217253 | 1313231 | 1314754 | 1256093 | 1254570 | 142364  | 140841 | 1018728 | 1020251 | 1225736 | 1227259 | 1739402 | 1740925 | 1224315 | 1225838 |         |
| 1998 BPSL1878  | 36 | 1325110            | 1323401 | 1208704 | 1206995 | 1219323 | 1217614 | 1316824 | 1315115 | 1252521 | 1254230 | 138820  | 140529 | 1022272 | 1020563 | 1229273 | 1227564 | 1742953 | 1741244 | 1227852 | 1226143 |         |
| 1999 BPSL1879  | 36 | 1325783            | 1325160 | 1209377 | 1208754 | 1219996 | 1219373 | 1317497 | 1316874 | 1251848 | 1252471 | 138147  | 138770 | 1022945 | 1022322 | 1229946 | 1229323 | 1743626 | 1743003 | 1228525 | 1227902 |         |
| 2000 BPSL1880  | 36 | 1326451            | 1325930 | 1210045 | 1209524 | 1220664 | 1220143 | 1318165 | 1317644 | 1251180 | 1251701 | 137479  | 138000 | 1023613 | 1023092 | 1230614 | 1230093 | 1744294 | 1743773 | 1229193 | 1228672 |         |
| 2001 BPSL1881  | 36 | 1326898            | 1328115 | 1210492 | 1211709 | 1221111 | 1222328 | 1318612 | 1319829 | 1250733 | 1249516 | 137032  | 135815 | 1024060 | 1025277 | 1231061 | 1232278 | 1744741 | 1745958 | 1229640 | 1230857 |         |
| 2002 BPSL1882  | 36 | 1328335            | 1329288 | 1211929 | 1212882 | 1222548 | 1223501 | 1320049 | 1321002 | 1249296 | 1248343 | 135595  | 134642 | 1025497 | 1026450 | 1232498 | 1233451 | 1746178 | 1747131 | 1231077 | 1232030 |         |
| 2003 BPSL1883  | 36 | 1329476            | 1331245 | 1213070 | 1214839 | 1223689 | 1225458 | 1321140 | 1322903 | 1248155 | 1246386 | 134454  | 132685 | 1026638 | 1028407 | 1233639 | 1235408 | 1747319 | 1749088 | 1232218 | 1233987 |         |
| 2004 BPSL1884  | 36 | 1331308            | 1332276 | 1214902 | 1215870 | 1225521 | 1226489 | 1322966 | 1323934 | 1246323 | 1245355 | 132622  | 131654 | 1028470 | 1029228 | 1235471 | 1236439 | 1749151 | 1750119 | 1234050 | 1235018 |         |
| 2005 BPSL1885  | 36 | 1332727            | 1332458 | 1216321 | 1216052 | 1226940 | 1226671 | 1324296 | 1324249 | 1244904 | 1245173 | 131203  | 131472 | 1029890 | 1029621 | 1236890 | 1236621 | 1750570 | 1750301 | 1235469 | 1235200 |         |
| 2006 BPSL1885A | 36 | 1333032            | 1333640 | 1216626 | 1217234 | 1227245 | 1227853 | 1324601 | 1325209 | 1244599 | 1243958 | 130898  | 130224 | 1030195 | 1030836 | 1237195 | 1237836 | 1750875 | 1751516 | 1235774 | 1236415 |         |
| 2007 BPSL1886  | 36 | 1334525            | 1333797 | 1218119 | 1217391 | 1228738 | 1228010 | 1326094 | 1325366 | 1243073 | 1243801 | 129339  | 130067 | 1031721 | 1030993 | 1238721 | 1237993 | 1752401 | 1751673 | 1237300 | 1236572 |         |
| 2008 BPSL1887  | 36 | 1335989            | 1334601 | 1219583 | 1218195 | 1230202 | 1228814 | 1327558 | 1326170 | 1241609 | 1242997 | 127875  | 129263 | 1033185 | 1031797 | 1240185 | 1238797 | 1753865 | 1752477 | 1238764 | 1237376 |         |
| 2009 BPSL1888  | 36 | 1337712            | 1336009 | 1225163 | 1224543 | 1231925 | 1230222 | 1329281 | 1327578 | 1239886 | 1241589 | 126152  | 127855 | 1034908 | 1033205 | 1241908 | 1240205 | 1755588 | 1753885 | 1240487 | 1238784 |         |
| 2010 BPSL1889  | 36 | 1338208            | 1337825 | 1225659 | 1225276 | 1232421 | 1232038 | 1329594 | 1329394 | 1239390 | 1239773 | 125656  | 126039 | 1035404 | 1035021 | 1242337 | 1242017 | 1756075 | 1755701 | 1240827 | 1240600 |         |
| 2011 BPSL1890  | 36 | 1339195            | 1338233 | 1223226 | 1222507 | 1233408 | 1232446 | 1330683 | 1329721 | 1238403 | 1239365 | 124669  | 125631 | 1036391 | 1035429 | 1243267 | 1242440 | 1757062 | 1756100 | 1241635 | 1240931 |         |
| 2012 BPSL1891  | 36 | 1340221            | 1339205 | 1224252 | 1223236 | 1234434 | 1233418 | 1331502 | 1330693 | 1237377 | 1238393 | 123643  | 124659 | 1037417 | 1036401 | 1243633 | 1243277 | 1758088 | 1757072 | 1242661 | 1241645 |         |
| 2013 BPSL1892  | 36 | 1341003            | 1340221 | 1227284 | 1226904 | 1235216 | 1234434 | 1332389 | 1331607 | 1236595 | 1237377 | 122861  | 123643 | 1038199 | 1037417 | 1244501 | 1243737 | 1758870 | 1758088 | 1243443 | 1242661 |         |
| 2014 BPSL1893  | 36 | 1342472            | 1342179 | 1228753 | 1228460 | 1236685 | 1236392 | 1333858 | 1333565 | 1235126 | 1235419 | 121392  | 121685 | 1039668 | 1039375 | 1245970 | 1245677 | 1760339 | 1760046 | 1244912 | 1244619 |         |
| 2015 BPSL1894  | 36 | 1343714            | 1342479 | 1229995 | 1228760 | 1237927 | 1236692 | 1335100 | 1333865 | 1233884 | 1235119 | 120150  | 121385 | 1040910 | 1039675 | 1247212 | 1245977 | 1761581 | 1760346 | 1246154 | 1244919 |         |
| 2016 BPSL1895  | 36 | 1345106            | 1343784 | 1231387 | 1230065 | 1239319 | 1237997 | 1336492 | 1335170 | 1232492 | 1233814 | 118758  | 120080 | 1042302 | 1040980 | 1248604 | 1247282 | 1762973 | 1761651 | 1247546 | 1246224 |         |
| 2017 BPSL1896  | 36 | 1346069            | 1345173 | 1232350 | 1231454 | 1240282 | 1239386 | 1337455 | 1336559 | 1231529 | 1232425 | 117795  | 118691 | 1043265 | 1042369 | 1249567 | 1248671 | 1763936 | 1763040 | 1248509 | 1247613 |         |
| 2018 BPSL1897  | 36 | 1346614            | 1346150 | 1232895 | 1232431 | 1240827 | 1240363 | 1338000 | 1337536 | 1230984 | 1231448 | 117250  | 117714 | 1043810 | 1043346 | 1250112 | 1249648 | 1764481 | 1764017 | 1249054 | 1248590 |         |
| 2019 BPSL1898  | 36 | 1347111            | 1346614 | 1233392 | 1232895 | 1241324 | 1240827 | 1338497 | 1338000 | 1230487 | 1230984 | 116753  | 117250 | 1044307 | 1043810 | 1250609 | 1250112 | 1764978 | 1764481 | 1249551 | 1249054 |         |
| 2020 BPSL1899  | 36 | 1347349            | 1347197 | 1233630 | 1233478 | 1241562 | 1241410 | 1338735 | 1338583 | 1230249 | 1230401 | 116515  | 116667 | 1044545 | 1044393 | 1250847 | 1250695 | 1765216 | 1765604 | 1249789 | 1249637 |         |
| 2021           |    | Chr1_87a_IS407A_A  | 1347348 | 1348583 | 1233629 | 1234864 | 1241561 | 1242796 | 1338734 | 1339969 | 1229015 | 1230250 | 115281 | 116516  | 1044544 | 1045779 | 1250846 | 1252081 | 1765215 | 1766450 | 1249788 | 1251023 |
| 2022           |    | Chr1_87b_IS407A_A  | 1085323 | 1086558 | 965187  | 966422  | 972761  | 973996  | 1078636 | 1079871 | 1534024 | 1535259 | 161685 | 162920  | 998173  | 999094  | 1210321 | 1211556 | 1459306 | 1460541 | 993925  | 995160  |
| 2023 BPSL1900  | 37 | 1086597            | 1086559 | 966461  | 966423  | 974035  | 973997  | 1079910 | 1079872 |         |         |         |        |         |         |         |         | 1460580 | 1460542 | 995199  | 995161  |         |
| 2024 BPSL1901  | 37 | 1087017            | 1088567 |         |         |         |         |         |         |         |         |         |        |         |         |         |         |         |         |         |         |         |

|               |                                    |         |         |         |         |         |         |         |         |         |         |         |        |        |        |         |         |         |         |         |         |         |
|---------------|------------------------------------|---------|---------|---------|---------|---------|---------|---------|---------|---------|---------|---------|--------|--------|--------|---------|---------|---------|---------|---------|---------|---------|
| 2027 BPSL1904 | 37                                 | 1091938 | 1092417 | 971802  | 972281  | 979376  | 979855  | 1085251 | 1085730 | 1528644 | 1528165 | 167822  | 168301 | 993280 | 992801 | 1200270 | 1199791 | 1465921 | 1466400 | 1000540 | 1001019 |         |
| 2028 BPSL1905 | 37                                 | 1093067 | 1092660 | 972931  | 972524  | 980505  | 980098  | 1086380 | 1085973 | 1527515 | 1527922 | 168951  | 168544 | 992151 | 992558 | 1199141 | 1199548 | 1467050 | 1466643 | 1001669 | 1001262 |         |
| 2029 BPSL1906 | 37                                 | 1094359 | 1093265 | 974223  | 973129  | 981797  | 980703  | 1087672 | 1086578 | 1526223 | 1527317 | 170243  | 169149 | 990859 | 991953 | 1197849 | 1198943 | 1468342 | 1467248 | 1002961 | 1001867 |         |
| 2030 BPSL1907 | 37                                 | 1095896 | 1094469 | 975760  | 974333  | 983334  | 981907  | 1089209 | 1087782 | 1524686 | 1526113 | 171780  | 170353 | 989322 | 990749 | 1196312 | 1197739 | 1469879 | 1468452 | 1004498 | 1003071 |         |
| 2031 BPSL1908 | 37                                 | 1097270 | 1095999 | 977134  | 975863  | 984708  | 983437  | 1090480 | 1090175 | 1523312 | 1524583 | 173154  | 171883 | 987948 | 989219 | 1194938 | 1196209 | 1471253 | 1469982 | 1005872 | 1004601 |         |
| 2032 BPSL1909 | 37                                 | 1100262 | 1097401 | 980126  | 977265  | 987700  | 984839  | 1093472 | 1090611 | 1520320 | 1523181 | 176146  | 173285 | 984956 | 987817 | 1191946 | 1194807 | 1474245 | 1471384 | 1008864 | 1006003 |         |
| 2033 BPSL1911 | 37                                 | 1102427 | 1100604 | 982291  | 980468  | 989865  | 988042  | 1095637 | 1093814 | 1518155 | 1519978 | 178311  | 176488 | 982791 | 984614 | 1189781 | 1191604 | 1476410 | 1474587 | 1011029 | 1009206 |         |
| 2034 BPSL1912 | 37                                 | 1102720 | 1103214 | 982584  | 983078  | 990158  | 990652  | 1095930 | 1096424 | 1517862 | 1517368 | 178604  | 179098 | 982498 | 982004 | 1189488 | 1188994 | 1476703 | 1477197 | 1011322 | 1011816 |         |
| 2035 BPSL1913 | 37                                 | 1103317 | 1104810 | 983181  | 984674  | 990755  | 992248  | 1096527 | 1098020 | 1517265 | 1515772 | 179201  | 180694 | 981901 | 980408 | 1188891 | 1187398 | 1477300 | 1478793 | 1011919 | 1013412 |         |
| 2036 BPSL1914 | 37                                 | 1104881 | 1106113 | 984745  | 985977  | 992319  | 993551  | 1098091 | 1098678 | 1515701 | 1514469 | 180765  | 181997 | 980337 | 979105 | 1187327 | 1186095 | 1478864 | 1480096 | 1013483 | 1014715 |         |
| 2037 BPSL1915 | 37                                 | 1106139 | 1107695 | 986003  | 987559  | 993577  | 995133  | 1099271 | 1100827 | 1514443 | 1512887 | 182023  | 183579 | 979079 | 977523 | 1186069 | 1184513 | 1480122 | 1481678 | 1014741 | 1016297 |         |
| 2038 BPSL1916 | 37                                 | 1108904 | 1107972 | 988768  | 987836  | 996342  | 995410  | 1102036 | 1101104 | 1511678 | 1512610 | 184788  | 183856 | 976314 | 977246 | 1183304 | 1184236 | 1482887 | 1481955 | 1017506 | 1016574 |         |
| 2039 BPSL1917 | 37                                 | 1109299 | 1108934 | 989163  | 988798  | 996737  | 996372  | 1102431 | 1102066 | 1511283 | 1511648 | 185183  | 184818 | 975919 | 976284 | 1182909 | 1183274 | 1483282 | 1482917 | 1017901 | 1017536 |         |
| 2040 BPSL1918 | 37                                 | 1112332 | 1109408 | 992196  | 989272  | 1000508 | 997584  | 1105475 | 1102551 | 1508248 | 1511172 | 188216  | 185292 | 972886 | 975810 | 1179876 | 1182800 | 1486315 | 1483391 | 1021018 | 1018094 |         |
| 2041 BPSL1919 | 37                                 | 1113899 | 1112427 | 993680  | 992739  | 1002075 | 1000603 | 1107042 | 1105570 | 1506681 | 1508153 | 189783  | 188311 | 971319 | 972791 | 1178309 | 1179781 | 1487882 | 1486410 | 1022585 | 1021113 |         |
| 2042 BPSL1920 | 37                                 | 1114357 | 1113899 | 994138  | 993680  | 1002533 | 1002075 | 1107500 | 1107042 | 1506223 | 1506681 | 190241  | 189783 | 970861 | 971319 | 1177851 | 1178309 | 1488340 | 1487882 | 1023043 | 1022585 |         |
| 2043 BPSL1921 | 37                                 | 1116326 | 1114665 | 996107  | 994446  | 1004916 | 1004602 | 1109469 | 1107808 | 1504254 | 1505915 | 192210  | 190549 | 968892 | 970553 | 1175881 | 1177542 | 1490309 | 1488648 | 1025012 | 1023351 |         |
| 2044 BPSL1922 | 37                                 | 1117718 | 1116393 | 997499  | 996174  | 1006308 | 1004983 | 1110861 | 1109536 | 1502862 | 1504187 | 193602  | 192277 | 967500 | 968825 | 1174489 | 1175814 | 1491701 | 1490376 | 1026177 | 1025335 |         |
| 2045 BPSL1923 | 37                                 | 1119039 | 1118140 | 998820  | 997921  | 1007629 | 1006730 | 1112182 | 1111283 | 1501541 | 1502440 | 194923  | 194024 | 966179 | 967078 | 1173168 | 1174067 | 1493022 | 1492123 | 1027498 | 1026599 |         |
| 2046 BPSL1924 | 37                                 | 1119461 | 1119856 | 999242  | 999637  | 1008051 | 1008446 | 1112604 | 1112999 | 1501119 | 1500724 | 195345  | 195740 | 965757 | 965362 | 1172746 | 1172351 | 1493444 | 1493839 | 1027920 | 1028315 |         |
| 2047 BPSL1925 | 37                                 | 1120098 | 1120319 | 999879  | 1000100 | 1008688 | 1008909 | 1113241 | 1113462 | 1500482 | 1500261 | 195982  | 196203 | 965120 | 964899 | 1172109 | 1171888 | 1494081 | 1494302 | 1028557 | 1028778 |         |
| 2048 BPSL1926 | 37                                 | 1120798 | 1120484 | 1000579 | 1000265 | 1009388 | 1009074 | 1113941 | 1113627 | 1499782 | 1500096 | 196682  | 196368 | 964420 | 964734 | 1171409 | 1171723 | 1494781 | 1494467 | 1029257 | 1028943 |         |
| 2049 BPSL1927 | 37                                 | 1120999 | 1121718 | 1000780 | 1001499 | 1009589 | 1010308 | 1114142 | 1114861 | 1499581 | 1498862 | 196883  | 197602 | 964219 | 963500 | 1171208 | 1170489 | 1494982 | 1495701 | 1029458 | 1030177 |         |
| 2050 BPSL1929 | 37                                 | 1121960 | 1122235 | 1001741 | 1002016 | 1010550 | 1010825 | 1115103 | 1115378 | 1498620 | 1498345 | 197844  | 198119 | 963258 | 962983 | 1170247 | 1169972 | 1495943 | 1496218 | 1030419 | 1030694 |         |
| 2051 BPSL1930 | 37                                 | 1122387 | 1122641 | 1002168 | 1002422 | 1010977 | 1011231 | 1115530 | 1115784 | 1498193 | 1497939 | 198271  | 198525 | 962831 | 962577 | 1169820 | 1169566 | 1496370 | 1496624 | 1030846 | 1031100 |         |
| 2052 BPSL1931 | 37                                 | 1122984 | 1122697 | 1002765 | 1002478 | 1011574 | 1011287 | 1116127 | 1115840 | 1497596 | 1497883 | 198868  | 198581 | 962234 | 962521 | 1169223 | 1169510 | 1496967 | 1496680 | 1031443 | 1031156 |         |
| 2053 partial  | Chr1_88_ISBma1_B                   | 37      | 1123080 | 1123337 | 1002861 | 1003118 | 1011670 | 1011927 | 1116223 | 1116480 | 1497242 | 1497500 |        |        |        |         |         | 1497063 | 1497359 | 1031539 | 1031835 |         |
| 2054          | Chr1_89_IS407A_A                   | 37      | 1123337 | 1124572 | 1003118 | 1004353 | 1011927 | 1013162 | 1116480 | 1117715 | 1496007 | 1497242 | 198950 | 200185 | 960917 | 962152  | 1167906 | 1169141 | 1497321 | 1498556 | 1031797 | 1033032 |
| 2055 partial  | Chr1_90_ISBma2_A                   | 37      | 1124052 | 1125266 | 1003833 | 1005047 | 1012642 | 1013856 | 1117195 | 1118409 | 1495313 | 1496527 | 199692 | 200879 | 960223 | 961410  | 1167212 | 1168399 | 1498063 | 1499250 | 1032539 | 1033726 |
| 2056 BPSL1933 | 37                                 | 1126550 | 1125327 | 1006331 | 1005108 | 1015140 | 1013917 | 1119693 | 1118470 | 1494029 | 1495252 | 202163  | 200940 | 958939 | 960162 | 1165928 | 1167151 | 1500534 | 1499311 | 1035010 | 1033787 |         |
| 2057 BPSL1934 | 37                                 | 1126879 | 1127076 | 1006660 | 1006857 | 1015469 | 1015666 | 1120022 | 1120219 | 1493700 | 1493503 | 202492  | 202980 | 958610 | 958122 | 1165599 | 1165111 | 1500863 | 1501351 | 1035339 | 1035827 |         |
| 2058          | Chr1_91_IS407A_B                   | 37      | 1127077 | 1128312 | 1006858 | 1008093 | 1015667 | 1016902 | 1120220 | 1121455 | 1492267 | 1493502 |        |        |        |         |         |         |         |         |         |         |
| 2059 BPSL1935 | 37                                 | 1128756 | 1129820 | 1008537 | 1009601 | 1017346 | 1018410 | 1121899 | 1122963 | 1491823 | 1490759 | 203129  | 204193 | 957973 | 956909 | 1164962 | 1163898 | 1501500 | 1502564 | 1035976 | 1037040 |         |
| 2060          | BPSL1936_putative membrane protein | 37      |         |         |         |         |         |         |         |         |         |         |        |        |        |         |         |         |         |         |         |         |
| 2061          | Chr1_92_IS407A_C                   | 37      |         |         |         |         |         |         |         |         |         |         |        |        |        |         |         |         |         |         | 1037784 | 1039019 |
| 2062 BPSL1937 | 37                                 | 1130448 | 1132565 | 1010229 | 1012346 | 1019038 | 1021155 | 1123591 | 1125708 | 1490131 | 1488014 | 204821  | 206938 | 956281 | 954164 | 1163270 | 1161153 | 1503192 | 1503305 | 1039019 | 1041025 |         |
| 2063          | Chr1_93_IS407A_C                   | 37      |         |         |         |         |         |         |         |         |         |         |        |        |        |         |         | 1503308 | 1504543 |         |         |         |
| 2064 BPSL1938 | 37                                 | 1133094 | 1132693 | 1012875 | 1012474 | 1021684 | 1021283 | 1126237 | 1125836 | 1487485 | 1487886 | 207467  | 207066 | 953635 | 954036 | 1160624 | 1161025 | 1507078 | 1506677 | 1041554 | 1041153 |         |
| 2065 BPSL1939 | 37                                 | 1133500 | 1133156 | 1013281 | 1012937 | 1022090 | 1021746 | 1126643 | 1126299 | 1487079 | 1487423 | 207873  | 207529 | 953229 | 953573 | 1160218 | 1160562 | 1507484 | 1507140 | 1041960 | 1041616 |         |
| 2066 BPSL1940 | 37                                 | 1136062 | 1133633 | 1015843 | 1013414 | 1024652 | 1022223 | 1129205 | 1126776 | 1484517 | 1486946 | 210435  | 208006 | 950667 | 953096 | 1157656 | 1160085 | 1510046 | 1507617 | 1044522 | 1042093 |         |
| 2067 BPSL1941 | 37                                 | 1137163 | 1136153 | 1016944 | 1015934 | 1025753 | 1024743 | 1130306 | 1129296 | 1483416 | 1484426 | 211536  | 210526 | 949566 | 950576 | 1156555 | 1157565 | 1511147 | 1510137 | 1045623 | 1044613 |         |
| 2068 BPSL1942 | 37                                 | 1137671 | 1137315 | 1017452 | 1017096 | 1026261 | 1025905 | 1130814 | 1130458 | 1482908 | 1483264 | 212044  | 211688 | 949058 | 949414 | 1156047 | 1156403 | 1511655 | 1511299 | 1046131 | 1045775 |         |
| 2069 BPSL1943 | 37                                 | 1137899 | 1137705 | 1017680 | 1017486 | 1026489 | 1026295 | 1131042 | 1130848 | 1482680 | 1482874 | 212272  | 212078 | 948830 | 949024 | 1155819 | 1156013 | 1511883 | 1511689 | 1046359 | 1046165 |         |
| 2070 BPSL1944 | 37                                 | 1138628 | 1138095 | 1018409 | 1017876 | 1027218 | 1026685 | 1131771 | 1131238 | 1481951 | 1482484 | 213001  | 212468 | 948101 | 948634 | 1155090 | 1155623 | 1512612 | 1512079 | 1047088 | 1046555 |         |
| 2071 BPSL1945 | 37                                 | 1140573 | 1138669 | 1020354 | 1018450 | 1029163 | 1027259 | 1133716 | 1131812 | 1480006 | 1481910 | 214946  | 213042 | 946156 | 948060 | 1153145 | 1155049 | 1514557 | 1512653 | 1049033 | 1047129 |         |
| 2072 BPSL1946 | 37                                 | 1143269 | 1141035 | 1023050 | 1020816 | 1031859 | 1029625 | 1136412 | 1134178 | 1477310 | 1479544 | 217642  | 215408 | 943460 | 945694 | 1150449 | 1152683 | 1517253 | 1515019 | 1051729 | 1049495 |         |
| 2073 BPSL1947 | 37                                 | 1143667 | 1143317 | 1023448 | 1023098 | 1032257 | 1031907 | 1136810 | 1136460 | 1476912 | 1477262 | 218040  | 217690 | 943062 | 943412 | 1150051 | 1150401 | 1517651 | 1517301 | 1051977 | 1051777 |         |
| 2074 BPSL1948 | 37                                 | 1144646 | 1143744 | 1024761 | 1023859 | 1033805 | 1032903 | 1137789 | 1136887 | 1475933 | 1476835 | 219019  | 218117 | 942083 | 942985 | 1149072 | 1149974 | 1518630 | 1517728 | 1052998 | 1052096 |         |
| 2075 BPSL1949 | 37                                 | 1145199 | 1145960 | 1025285 | 1025317 | 1034329 | 1034361 | 1138313 | 1138345 | 1475409 | 1475377 | 219539  | 219571 | 941563 | 941531 | 1148552 | 1148520 | 1519150 | 1519182 | 1053518 |         |         |

|               |    |                   |         |         |         |         |         |         |         |         |         |         |        |        |        |         |         |         |         |         |         |         |
|---------------|----|-------------------|---------|---------|---------|---------|---------|---------|---------|---------|---------|---------|--------|--------|--------|---------|---------|---------|---------|---------|---------|---------|
| 2078 BPSL1952 | 37 | 1147642           | 1148739 | 1027757 | 1028854 | 1036801 | 1037898 | 1140785 | 1141882 | 1472937 | 1471840 | 222011  | 223108 | 939091 | 937994 | 1146080 | 1144983 | 1521622 | 1522719 | 1055990 | 1057087 |         |
| 2079 BPSL1953 | 37 | 1148786           | 1149505 | 1028901 | 1029620 | 1037945 | 1038664 | 1141929 | 1142648 | 1471793 | 1471074 | 223155  | 223874 | 937947 | 937228 | 1144936 | 1144217 | 1522766 | 1523485 | 1057134 | 1057853 |         |
| 2080 BPSL1954 | 37 | 1150539           | 1149901 | 1030654 | 1030016 | 1039698 | 1039060 | 1143682 | 1143044 | 1470040 | 1470678 | 224922  | 224284 | 936180 | 936818 | 1143176 | 1143814 | 1524512 | 1523874 | 1058880 | 1058242 |         |
| 2081 BPSL1955 | 37 | 1151245           | 1150544 | 1031360 | 1030659 | 1040404 | 1039703 | 1144388 | 1143687 | 1469334 | 1470035 | 225628  | 224927 | 935474 | 936175 | 1142470 | 1143171 | 1525218 | 1524517 | 1059586 | 1058885 |         |
| 2082 BPSL1956 | 37 | 1151498           | 1152040 | 1031613 | 1032155 | 1040657 | 1041199 | 1144641 | 1145183 | 1469081 | 1468539 | 225881  | 226423 | 935221 | 934679 | 1142217 | 1141675 | 1525471 | 1526013 | 1059839 | 1060381 |         |
| 2083 BPSL1957 | 37 | 1152614           | 1154143 | 1032729 | 1034258 | 1041773 | 1043302 | 1145757 | 1147286 | 1467965 | 1466436 | 226997  | 228526 | 934105 | 932576 | 1141101 | 1139572 | 1526587 | 1528116 | 1060955 | 1062484 |         |
| 2084 BPSL1958 | 37 | 1155075           | 1156145 | 1035190 | 1036260 | 1044234 | 1045304 | 1148218 | 1149288 | 1465504 | 1464434 | 229458  | 230528 | 931644 | 930574 | 1138640 | 1137570 | 1529048 | 1530118 | 1063416 | 1064486 |         |
| 2085 BPSL1959 | 37 | 1156955           | 1156527 | 1037070 | 1036642 | 1046114 | 1045686 | 1150098 | 1149670 | 1463624 | 1464052 | 231338  | 230910 | 929764 | 930192 | 1136760 | 1137188 | 1530928 | 1530500 | 1065296 | 1064868 |         |
| 2086 BPSL1960 | 37 | 1157779           | 1157003 | 1037894 | 1037118 | 1046938 | 1046162 | 1150922 | 1150146 | 1462800 | 1463576 | 232162  | 231386 | 928940 | 929716 | 1135936 | 1136712 | 1531752 | 1530976 | 1066120 | 1065344 |         |
| 2087 BPSL1961 | 37 | 1157960           | 1159630 | 1038075 | 1039745 | 1047119 | 1048789 | 1151103 | 1152773 | 1462619 | 1460949 | 232343  | 234013 | 928759 | 927089 | 1135755 | 1134085 | 1531933 | 1533603 | 1066301 | 1067971 |         |
| 2088          |    | Chr1_94a_IS407A_A | 1160172 | 1161407 | 1040287 | 1041522 | 1049331 | 1050566 | 1153315 | 1154550 | 1459172 | 1460407 | 234555 | 235790 | 925312 | 926547  | 1132308 | 1133543 | 1534145 | 1535380 | 1068513 | 1069748 |
| 2089          |    | Chr1_94b_IS407A_A | 999459  | 1000694 | 878580  | 879815  | 885069  | 886304  | 992740  | 993975  | 1109938 | 1111173 | 414441 | 415676 | 745418 | 746653  | 871391  | 872626  | 1454166 | 1455087 | 952619  | 953854  |
| 2090 BPSL1962 | 38 | 997675            | 998781  | 876796  | 877902  | 883285  | 884391  | 990956  | 992062  | 1108154 | 1109260 | 417895  | 416789 | 743199 | 744305 | 869172  | 870278  | 1452373 | 1453479 | 949824  | 950930  |         |
| 2091 BPSL1963 | 38 | 997104            | 997307  | 874102  | 875835  | 880990  | 882723  | 988661  | 990394  | 1105859 | 1107592 | 420190  | 418457 | 740904 | 742637 | 866878  | 867636  | 1450078 | 1451811 | 947529  | 949262  |         |
| 2092 BPSL1964 | 38 | 994816            | 995277  | 873538  | 873999  | 880426  | 880887  | 988097  | 988558  | 1105295 | 1105756 | 420754  | 420293 | 740340 | 740801 | 866314  | 866775  | 1449514 | 1449675 | 946965  | 947426  |         |
| 2093 BPSL1965 | 38 | 994599            | 994282  | 873321  | 873004  | 880209  | 879892  | 987880  | 987563  | 1105078 | 1104761 | 420971  | 421288 | 740123 | 739806 | 866097  | 865780  | 1449297 | 1448980 | 946748  | 946431  |         |
| 2094 BPSL1966 | 38 | 992803            | 994104  | 871525  | 872826  | 878413  | 879714  | 986084  | 987385  | 1103282 | 1104583 | 422764  | 421466 | 738330 | 739628 | 864304  | 865602  | 1447501 | 1448802 | 944952  | 946253  |         |
| 2095 BPSL1967 | 38 | 992688            | 992083  | 871410  | 870805  | 878298  | 877693  | 985969  | 985364  | 1103167 | 1102562 | 422879  | 423484 | 738215 | 737610 | 864189  | 863584  | 1447386 | 1446781 | 944837  | 944232  |         |
| 2096 BPSL1968 | 38 | 992083            | 991637  | 870805  | 870359  | 877693  | 877247  | 985364  | 984918  | 1102562 | 1102116 | 423484  | 423930 | 737610 | 737164 | 863584  | 863138  | 1446781 | 1446335 | 944232  | 943786  |         |
| 2097 BPSL1969 | 38 | 991599            | 990181  | 870321  | 868903  | 877209  | 875791  | 984880  | 983462  | 1102078 | 1100660 | 423968  | 425386 | 737126 | 735708 | 863100  | 861682  | 1446297 | 1444879 | 943748  | 942330  |         |
| 2098 BPSL1970 | 38 | 990146            | 989166  | 868868  | 867888  | 875756  | 874776  | 983427  | 982447  | 1100625 | 1099645 | 425421  | 426401 | 735673 | 734693 | 861647  | 860667  | 1444844 | 1443864 | 942295  | 941315  |         |
| 2099 BPSL1971 | 38 | 987878            | 988816  | 866600  | 867538  | 873488  | 874426  | 981159  | 982097  | 1098357 | 1099295 | 427689  | 426751 | 733405 | 734343 | 859379  | 860317  | 1442576 | 1443514 | 940027  | 940965  |         |
| 2100 BPSL1972 | 38 | 987720            | 985957  | 866442  | 864679  | 873330  | 871567  | 981001  | 979238  | 1098199 | 1096451 | 427847  | 429604 | 733247 | 731490 | 859221  | 857464  | 1442518 | 1440679 | 939869  | 938130  |         |
| 2101 BPSL1973 | 38 | 985922            | 983724  | 864644  | 862446  | 871532  | 869334  | 979203  | 977005  | 1096428 | 1094230 | 429627  | 431825 | 731467 | 729269 | 857441  | 855243  | 1440656 | 1438458 | 938107  | 935909  |         |
| 2102 BPSL1974 | 38 | 983724            | 983524  | 862446  | 862246  | 869334  | 869134  | 977005  | 976805  | 1094230 | 1094030 | 431825  | 432025 | 729269 | 729069 | 855243  | 855043  | 1438458 | 1438258 | 935909  | 935709  |         |
| 2103 BPSL1975 | 38 | 983519            | 982629  | 862241  | 861351  | 869129  | 868239  | 976800  | 975910  | 1094025 | 1093135 | 432030  | 432920 | 729064 | 728174 | 855038  | 854148  | 1438253 | 1437363 | 935704  | 934814  |         |
| 2104 BPSL1976 | 38 | 980610            | 982283  | 859332  | 861005  | 866220  | 867893  | 973891  | 975564  | 1091125 | 1092789 | 434947  | 433274 | 726147 | 727820 | 852121  | 853794  | 1435336 | 1437009 | 932497  | 934170  |         |
| 2105 BPSL1977 | 38 | 980258            | 979011  | 858980  | 857733  | 865868  | 864621  | 973539  | 972292  | 1090773 | 1089526 | 435299  | 436546 | 725795 | 724548 | 851769  | 850522  | 1434984 | 1433737 | 932145  | 930898  |         |
| 2106 BPSL1978 | 38 | 977882            | 978667  | 856604  | 857389  | 863492  | 864277  | 971163  | 971948  | 1088373 | 1089158 | 437667  | 436882 | 723427 | 724212 | 849409  | 850194  | 1432624 | 1433409 | 929793  | 930578  |         |
| 2107 BPSL1979 | 38 | 975522            | 977882  | 854244  | 856604  | 861132  | 863492  | 968803  | 971163  | 1086013 | 1088373 | 440027  | 437667 | 721067 | 723427 | 847049  | 849409  | 1430264 | 1432624 | 927433  | 929793  |         |
| 2108 BPSL1980 | 38 | 975382            | 972518  | 854104  | 851240  | 860992  | 858128  | 968663  | 965799  | 1085873 | 1083009 | 440167  | 443031 | 720927 | 718063 | 846909  | 844045  | 1430124 | 1427260 | 927293  | 924429  |         |
| 2109 BPSL1981 | 38 | 972428            | 971550  | 851150  | 850272  | 858038  | 857160  | 965709  | 964831  | 1082919 | 1082041 | 443121  | 443999 | 717973 | 717095 | 843955  | 843077  | 1427170 | 1426292 | 924339  | 923461  |         |
| 2110 BPSL1982 | 38 | 970869            | 971483  | 849591  | 850205  | 856479  | 857093  | 964150  | 964764  | 1081360 | 1081974 | 444680  | 444066 | 716414 | 717028 | 842396  | 843010  | 1425611 | 1426225 | 922780  | 923394  |         |
| 2111 BPSL1983 | 38 | 968387            | 970777  | 847109  | 849499  | 853997  | 856387  | 961668  | 964058  | 1078878 | 1081268 | 447162  | 444772 | 713932 | 716322 | 839914  | 842304  | 1423129 | 1425519 | 920298  | 922688  |         |
| 2112 BPSL1984 | 38 | 967030            | 968373  | 845752  | 847095  | 852640  | 853983  | 960311  | 961654  | 1077521 | 1078864 | 448519  | 447176 | 712575 | 713918 | 838557  | 839900  | 1421772 | 1423115 | 918941  | 920284  |         |
| 2113 BPSL1985 | 38 | 966287            | 967012  | 845009  | 845734  | 851897  | 852622  | 959568  | 960293  | 1076778 | 1077503 | 449262  | 448537 | 711832 | 712557 | 837814  | 838539  | 1421029 | 1421754 | 918198  | 918923  |         |
| 2114 BPSL1986 | 38 | 965597            | 965980  | 844319  | 844702  | 851207  | 851590  | 958878  | 959261  | 1076088 | 1076471 | 449952  | 449569 | 711142 | 711525 | 837124  | 837507  | 1420339 | 1420722 | 917508  | 917891  |         |
| 2115 BPSL1987 | 38 | 965091            | 965318  | 843813  | 844040  | 850701  | 850928  | 958372  | 958599  | 1075582 | 1075809 | 450458  | 450231 | 710636 | 710863 | 836618  | 836845  | 1419833 | 1420060 | 917002  | 917229  |         |
| 2116 BPSL1988 | 38 | 963889            | 964923  | 842611  | 843645  | 849499  | 850533  | 957170  | 958204  | 1074380 | 1075414 | 451660  | 450626 | 709434 | 710468 | 835416  | 836450  | 1419021 | 1419665 | 915800  | 916834  |         |
| 2117 BPSL1989 | 38 | 962857            | 963873  | 841579  | 842595  | 848467  | 849483  | 956138  | 957154  | 1073348 | 1074364 | 452692  | 451676 | 708402 | 709418 | 834384  | 835400  | 1417600 | 1418616 | 914768  | 915784  |         |
| 2118 BPSL1990 | 38 | 961983            | 962861  | 840705  | 841583  | 847593  | 848471  | 955264  | 956142  | 1072474 | 1073352 | 453566  | 452688 | 707528 | 708406 | 833510  | 834388  | 1416726 | 1417604 | 913894  | 914772  |         |
| 2119 BPSL1991 | 38 | 961738            | 960692  | 840460  | 839414  | 847348  | 846302  | 955019  | 953973  | 1072229 | 1071183 | 453811  | 454857 | 707283 | 706237 | 833265  | 832219  | 1416481 | 1415435 | 913649  | 912603  |         |
| 2120 BPSL1992 | 38 | 960588            | 959446  | 839310  | 838168  | 846198  | 845056  | 953869  | 952727  | 1071079 | 1069937 | 454961  | 456103 | 706133 | 704991 | 832115  | 830973  | 1415331 | 1414189 | 912499  | 911357  |         |
| 2121 BPSL1993 | 38 | 959430            | 958633  | 838152  | 837355  | 845040  | 844243  | 952711  | 951914  | 1069921 | 1069124 | 456119  | 456916 | 704975 | 704178 | 830957  | 830160  | 1414173 | 1413376 | 911341  | 910544  |         |
| 2122 BPSL1994 | 38 | 958616            | 956619  | 837338  | 835341  | 844226  | 842229  | 951897  | 949900  | 1069107 | 1067110 | 456933  | 458930 | 704161 | 702164 | 830143  | 828146  | 1413359 | 1411362 | 910527  | 908530  |         |
| 2123 BPSL1995 | 38 | 956605            | 954623  | 835347  | 833345  | 842215  | 840233  | 949886  | 947904  | 1067096 | 1065114 | 458944  | 460926 | 702150 | 700168 | 828132  | 826150  | 1411348 | 1409366 | 908516  | 906534  |         |
| 2124 BPSL1996 | 38 | 954623            | 953706  | 833345  | 832428  | 840233  | 839316  | 947904  | 946987  | 1065114 | 1064197 | 460926  | 461843 | 700168 | 699251 | 826150  | 825233  | 1409366 | 1408449 | 906534  | 905617  |         |
| 2125 BPSL1997 | 38 | 953703            | 952903  | 832425  | 831625  | 839313  | 838513  | 946984  | 946184  | 1064194 | 1063394 | 461846  | 462646 | 699248 | 698448 | 825230  | 824430  | 1408446 | 1407646 | 905614  | 904814  |         |
| 2126 BPSL1998 | 38 | 952079            | 952780  | 830801  | 831502  | 837689  | 838390  | 945360  |         |         |         |         |        |        |        |         |         |         |         |         |         |         |







|      |                   |    |         |         |         |         |         |         |         |         |         |         |         |         |         |         |         |         |         |         |         |         |
|------|-------------------|----|---------|---------|---------|---------|---------|---------|---------|---------|---------|---------|---------|---------|---------|---------|---------|---------|---------|---------|---------|---------|
| 2231 | BPSL2094          | 39 | 1539638 | 1540360 | 1427230 | 1427952 | 1436632 | 1437354 | 1530204 | 1530926 | 1693294 | 1694016 | 3381338 | 3380616 | 1236928 | 1237650 | 1443074 | 1443796 | 1957451 | 1958173 | 1486268 | 1486990 |
| 2232 | BPSL2095          | 39 | 1540430 | 1541785 | 1428022 | 1429377 | 1437424 | 1438779 | 1530996 | 1532351 | 1694086 | 1695441 | 3380546 | 3379191 | 1237720 | 1239075 | 1443866 | 1445221 | 1958243 | 1959598 | 1487060 | 1488415 |
| 2233 | BPSL2096          | 39 | 1541987 | 1542532 | 1429579 | 1430124 | 1438981 | 1439526 | 1532553 | 1533098 | 1695643 | 1696188 | 3378989 | 3378444 | 1239277 | 1239822 | 1445423 | 1445968 | 1959800 | 1960345 | 1488617 | 1489162 |
| 2234 | BPSL2097          | 39 | 1542613 | 1543137 | 1430205 | 1430729 | 1439607 | 1440131 | 1533179 | 1533703 | 1696269 | 1696793 | 3378363 | 3377839 | 1239903 | 1240427 | 1446049 | 1446573 | 1960426 | 1960950 | 1489243 | 1489767 |
| 2235 | BPSL2098          | 39 | 1543997 | 1543512 | 1431589 | 1431104 | 1440991 | 1440506 | 1534563 | 1534078 | 1697653 | 1697168 | 3376989 | 3377474 | 1241277 | 1240792 | 1447423 | 1446938 | 1961810 | 1961325 | 1490627 | 1490142 |
| 2236 | BPSL2099          | 39 | 1544748 | 1544401 | 1432340 | 1431633 | 1441742 | 1441035 | 1535314 | 1534607 | 1698404 | 1697697 | 3376238 | 3376945 | 1242028 | 1241321 | 1448174 | 1447467 | 1962561 | 1961854 | 1491378 | 1490671 |
| 2237 | BPSL2100          | 39 | 1544769 | 1548335 | 1432361 | 1435927 | 1441763 | 1445329 | 1535335 | 1538901 | 1698425 | 1701991 | 3376217 | 3372651 | 1242049 | 1245615 | 1448195 | 1451761 | 1962582 | 1966148 | 1491399 | 1494965 |
| 2238 | BPSL2101          | 39 | 1549588 | 1550754 | 1437180 | 1438346 | 1446582 | 1447748 | 1540154 | 1541320 | 1703258 | 1704424 | 3371342 | 3370176 | 1247015 | 1248181 | 1453077 | 1454243 | 1967415 | 1968581 | 1496225 | 1497391 |
| 2239 | BPSL2102          | 39 | 1550819 | 1551847 | 1438411 | 1439439 | 1447813 | 1448841 | 1541385 | 1542413 | 1704489 | 1705517 | 3370111 | 3369083 | 1248246 | 1249274 | 1454308 | 1455336 | 1968646 | 1969674 | 1497456 | 1498484 |
| 2240 | BPSL2103          | 39 | 1552358 | 1552762 | 1439950 | 1440354 | 1449352 | 1449756 | 1542924 | 1543328 | 1706028 | 1706432 | 3368572 | 3368168 | 1249785 | 1250189 | 1455847 | 1456251 | 1970185 | 1970589 | 1498995 | 1499399 |
| 2241 | BPSL2104          | 39 | 1555878 | 1553323 | 1443470 | 1440915 | 1452872 | 1450317 | 1546444 | 1543889 | 1709548 | 1706993 | 3365052 | 3367607 | 1253305 | 1250750 | 1459367 | 1456812 | 1973705 | 1971159 | 1502515 | 1499960 |
| 2242 | BPSL2105          | 39 | 1556357 | 1557034 | 1443949 | 1444626 | 1453351 | 1454028 | 1546923 | 1547600 | 1710027 | 1710704 | 3364573 | 3363896 | 1253784 | 1254461 | 1459846 | 1460523 | 1974184 | 1974861 | 1502994 | 1503671 |
| 2243 | BPSL2106          | 39 | 1557152 | 1558363 | 1444827 | 1446038 | 1454146 | 1455357 | 1547732 | 1548943 | 1710822 | 1712033 | 3363778 | 3362567 | 1254579 | 1255790 | 1460683 | 1461894 | 1974979 | 1976190 | 1503863 | 1505074 |
| 2244 | Chr1_100_ISBma2_B | 39 | 1558411 | 1559983 | 1446086 | 1447658 | 1455405 | 1456977 | 1548991 | 1550563 | 1712081 | 1713653 |         |         |         |         |         |         |         |         |         |         |
| 2245 | BPSL2107          | 39 | 1560145 | 1560573 | 1447820 | 1448248 | 1457139 | 1457567 | 1550725 | 1551153 | 1713815 | 1714243 | 3362380 | 3361952 | 1255977 | 1256405 | 1462081 | 1462509 | 1976377 | 1976805 | 1505261 | 1505689 |
| 2246 | BPSL2108          | 39 | 1560889 | 1561383 | 1448564 | 1449058 | 1457883 | 1458377 | 1551469 | 1551963 | 1714559 | 1715053 | 3361636 | 3361142 | 1256721 | 1257215 | 1462825 | 1463319 | 1977121 | 1977615 | 1506005 | 1506499 |
| 2247 | Chr1_101_ISBma2_A |    | 1561424 | 1562996 | 1449099 | 1450671 | 1458418 | 1459990 | 1552004 | 1553576 | 1715094 | 1716666 | 3359529 | 3361101 | 1257256 | 1258828 | 1463360 | 1464932 | 1977656 | 1979228 | 1506540 | 1508112 |
| 2248 | BPSL2109          |    |         |         |         |         |         |         |         |         |         |         |         |         |         |         |         |         |         |         |         |         |
| 2249 | BPSL2110          |    |         |         |         |         |         |         |         |         |         |         |         |         |         |         |         |         |         |         |         |         |
| 2250 | BPSL2111          |    |         |         |         |         |         |         |         |         |         |         |         |         |         |         |         |         |         |         |         |         |
| 2251 | BPSL2112          |    |         |         |         |         |         |         |         |         |         |         |         |         |         |         |         |         |         |         |         |         |
| 2252 | BPSL2113          |    |         |         |         |         |         |         |         |         |         |         |         |         |         |         |         |         |         |         |         |         |
| 2253 | BPSL2114          |    |         |         |         |         |         |         |         |         |         |         |         |         |         |         |         |         |         |         |         |         |
| 2254 | Chr1_102_ISBma2_A |    | 1561424 | 1562996 | 1449099 | 1450671 | 1458418 | 1459990 | 1552004 | 1553576 | 1715094 | 1716666 | 3359529 | 3361101 | 1257256 | 1258828 | 1463360 | 1464932 | 1977656 | 1979228 | 1506540 | 1508112 |
| 2255 | BPSL2115          | 39 | 1564372 | 1563863 | 1452047 | 1451538 | 1461366 | 1460857 | 1554952 | 1554443 | 1718064 | 1717555 | 3358164 | 3358673 | 1260193 | 1259684 | 1466308 | 1465799 | 1980582 | 1980073 |         |         |
| 2256 | BPSL2116          | 39 | 1565382 | 1564372 | 1453057 | 1452047 | 1462376 | 1461366 | 1555962 | 1554952 | 1719074 | 1718064 | 3357154 | 3358164 | 1261203 | 1260193 | 1467318 | 1466308 | 1981592 | 1980582 | 1510476 | 1509466 |
| 2257 | BPSL2117          | 39 | 1566135 | 1565614 | 1453810 | 1453289 | 1463129 | 1462608 | 1556715 | 1556194 | 1719827 | 1719306 | 3356401 | 3356922 | 1261956 | 1261435 | 1468071 | 1467550 | 1982345 | 1981824 | 1511229 | 1510708 |
| 2258 | BPSL2118          | 39 | 1567085 | 1566135 | 1454760 | 1453810 | 1464079 | 1463129 | 1557665 | 1556715 | 1720777 | 1719827 | 3355451 | 3356401 | 1262906 | 1261956 | 1469021 | 1468071 | 1983295 | 1982345 | 1512179 | 1511229 |
| 2259 | BPSL2119          | 39 | 1568169 | 1567234 | 1455844 | 1454909 | 1465163 | 1464228 | 1558749 | 1557814 | 1721861 | 1720926 | 3354367 | 3355302 | 1263990 | 1263055 | 1470105 | 1469170 | 1984379 | 1983444 | 1513263 | 1512328 |
| 2260 | BPSL2120          | 39 | 1569712 | 1568183 | 1457387 | 1455858 | 1466706 | 1465177 | 1560292 | 1558763 | 1723404 | 1721875 | 3352824 | 3354303 | 1265533 | 1264004 | 1471648 | 1470119 | 1985922 | 1984393 | 1514806 | 1513277 |
| 2261 | BPSL2121          | 39 | 1570529 | 1569828 | 1458204 | 1457503 | 1467523 | 1466822 | 1561109 | 1560408 | 1724221 | 1723520 | 3352007 | 3352708 | 1266350 | 1265649 | 1472465 | 1471764 | 1986739 | 1986038 | 1515623 | 1514922 |
| 2262 | Chr1_103_ISBma1_A | 39 | 1570802 | 1572106 | 1458477 | 1459781 | 1467796 | 1469100 | 1561382 | 1562686 | 1724494 | 1725798 | 3350430 | 3351734 | 1266623 | 1267927 | 1472738 | 1474042 | 1987012 | 1988316 | 1515896 | 1517200 |
| 2263 | BPSL2122          | 39 | 1573098 | 1572160 | 1460773 | 1459835 | 1470092 | 1469154 | 1563678 | 1562740 | 1726790 | 1725852 | 3349438 | 3350376 | 1268919 | 1267981 | 1475034 | 1474096 | 1989308 | 1988370 | 1518192 | 1517254 |
| 2264 | BPSL2123          | 39 | 1573678 | 1573157 | 1461353 | 1460832 | 1470672 | 1470151 | 1564258 | 1563737 | 1727370 | 1726849 | 3348858 | 3349379 | 1269499 | 1268978 | 1475614 | 1475093 | 1989888 | 1989367 | 1518772 | 1518251 |
| 2265 | BPSL2124          | 39 | 1574148 | 1573750 | 1461823 | 1461425 | 1471142 | 1470744 | 1564728 | 1564330 | 1727840 | 1727442 | 3348388 | 3348786 | 1269969 | 1269571 | 1476084 | 1475686 | 1990358 | 1989960 | 1519242 | 1518844 |
| 2266 | BPSL2125          | 39 | 1575454 | 1574951 | 1463129 | 1462626 | 1472448 | 1471945 | 1566034 | 1565531 | 1729146 | 1728643 | 3347082 | 3347585 | 1271275 | 1270772 | 1477390 | 1476887 | 1991664 | 1991161 | 1520548 | 1520045 |
| 2267 | BPSL2126          | 39 | 1575822 | 1577039 | 1463497 | 1464714 | 1472816 | 1474033 | 1566402 | 1567619 | 1729514 | 1730731 | 3346714 | 3345497 | 1271643 | 1272860 | 1477758 | 1478975 | 1992032 | 1993249 | 1520916 | 1522133 |
| 2268 | BPSL2127          | 39 | 1580018 | 1578378 | 1467693 | 1466053 | 1477012 | 1475372 | 1570598 | 1568958 | 1733710 | 1732070 | 3342518 | 3344158 | 1275839 | 1274199 | 1481954 | 1480314 | 1996228 | 1994589 | 1525112 | 1523472 |
| 2269 | BPSL2128          | 39 | 1580775 | 1580125 | 1468450 | 1467800 | 1478504 | 1478100 | 1571355 | 1570705 | 1734467 | 1733817 | 3341761 | 3342411 | 1276596 | 1275946 | 1482711 | 1482061 | 1996985 | 1996335 | 1525869 | 1525219 |
| 2270 | BPSL2129          | 39 | 1582242 | 1580785 | 1469917 | 1468460 | 1479971 | 1478514 | 1572822 | 1571365 | 1735934 | 1734477 | 3340294 | 3341751 | 1278063 | 1276606 | 1484178 | 1482721 | 1998452 | 1996995 | 1527336 | 1525879 |
| 2271 | BPSL2130          | 39 | 1583424 | 1582663 | 1471099 | 1470338 | 1481153 | 1480392 | 1574004 | 1573243 | 1737116 | 1736355 | 3339112 | 3339873 | 1279245 | 1278484 | 1485360 | 1484599 | 1999634 | 1998873 | 1528518 | 1527757 |
| 2272 | BPSL2131          | 39 | 1583629 | 1584330 | 1471236 | 1471340 | 1481290 | 1481394 | 1574141 | 1574245 | 1737253 | 1737357 | 3338975 | 3338871 | 1279382 | 1279486 | 1485497 | 1485601 | 1999771 | 1999875 | 1528655 | 1528759 |
| 2273 | BPSL2133          | 39 | 1584812 | 1585492 | 1472487 | 1473167 | 1482541 | 1483221 | 1575392 | 1576072 | 1738504 | 1739184 | 3337724 | 3337044 | 1280633 | 1281313 | 1486748 | 1487428 | 2001022 | 2001702 | 1529906 | 1530586 |
| 2274 | BPSL2134          | 39 | 1585830 | 1586795 | 1473505 | 1474470 | 1483559 | 1484524 | 1576410 | 1577375 | 1739522 | 1740487 | 3336706 | 3335741 | 1281651 | 1282616 | 1487766 | 1488731 | 2002040 | 2003005 | 1530924 | 1531889 |
| 2275 | BPSL2135          | 39 | 1587266 | 1586946 | 1474941 | 1474621 | 1484995 | 1484675 | 1577846 | 1577526 | 1740958 | 1740638 | 3335270 | 3335590 | 1283087 | 1282767 | 1489202 | 1488882 | 2003476 | 2003156 | 1532360 | 1532040 |
| 2276 | BPSL2136          | 39 | 1587709 | 1587275 | 1475384 | 1474950 | 1485438 | 1485004 | 1578289 | 1577855 | 1741401 | 1740967 | 3334827 | 3335261 | 1283530 | 1283096 | 1489645 | 1489211 | 2003919 | 2003485 | 1532803 | 1532369 |
| 2277 | BPSL2137          | 39 | 1587807 | 1588250 | 1475482 | 1475925 | 1485536 | 1485979 | 1578387 | 1578830 | 1741499 | 1741942 | 3334729 | 3334286 | 1283628 | 1284071 | 1489743 | 1490186 | 2004017 | 2004460 | 1532901 | 1533344 |
| 2278 | BPSL2138          | 39 | 1589369 | 1588425 | 1477044 | 1476100 | 1487098 | 1486154 | 1579949 | 1579005 | 1743061 | 1742117 | 3333167 | 3334111 | 1285190 | 1284246 | 1491305 | 1490361 | 2005579 | 2004635 | 1534463 | 1533519 |
| 2279 | BPSL2139          | 39 | 1589883 | 1589452 | 1477558 | 1477127 | 1487612 | 1487181 | 1580463 | 1580032 | 1743575 | 1743144 | 3332653 | 3333084 | 1285704 | 1285273 | 1491819 | 1491388 | 2006093 | 2005662 | 1534977 | 1534546 |
| 2280 | BPSL2140          | 39 | 1592410 | 1590014 | 1480085 | 1477689 |         |         |         |         |         |         |         |         |         |         |         |         |         |         |         |         |

|      |          |    |         |         |         |         |         |         |         |         |         |         |         |         |         |         |         |         |         |         |         |         |
|------|----------|----|---------|---------|---------|---------|---------|---------|---------|---------|---------|---------|---------|---------|---------|---------|---------|---------|---------|---------|---------|---------|
| 2282 | BPSL2142 | 39 | 1596120 | 1594222 | 1483795 | 1481897 | 1493849 | 1491951 | 1586700 | 1584802 | 1749806 | 1747908 | 3326410 | 3328308 | 1291947 | 1290049 | 1498062 | 1496164 | 2012342 | 2010444 | 1541220 | 1539322 |
| 2283 | BPSL2143 | 39 | 1596655 | 1597467 | 1484330 | 1485142 | 1494384 | 1495196 | 1587235 | 1588047 | 1750341 | 1751153 | 3325875 | 3325063 | 1292482 | 1293294 | 1498597 | 1499409 | 2012877 | 2013689 | 1541755 | 1542567 |
| 2284 | BPSL2144 | 39 | 1598460 | 1597675 | 1486135 | 1485350 | 1496189 | 1495404 | 1589040 | 1588255 | 1752146 | 1751361 | 3324070 | 3324855 | 1294287 | 1293502 | 1500402 | 1499617 | 2014682 | 2013897 | 1543560 | 1542775 |
| 2285 | BPSL2145 | 39 | 1599101 | 1598460 | 1486776 | 1486135 | 1496830 | 1496189 | 1589681 | 1589040 | 1752787 | 1752146 | 3323429 | 3324070 | 1294928 | 1294287 | 1501043 | 1500402 | 2015323 | 2014682 | 1544201 | 1543560 |
| 2286 | BPSL2146 | 39 | 1600267 | 1599104 | 1487942 | 1486779 | 1497996 | 1496833 | 1590847 | 1589684 | 1753953 | 1752790 | 3322263 | 3323426 | 1296094 | 1294931 | 1502209 | 1501046 | 2016489 | 2015326 | 1545367 | 1544204 |
| 2287 | BPSL2147 | 39 | 1601059 | 1600274 | 1488734 | 1487949 | 1498788 | 1498003 | 1591639 | 1590854 | 1754745 | 1753960 | 3321471 | 3322256 | 1296886 | 1296101 | 1503001 | 1502216 | 2017281 | 2016496 | 1546159 | 1545374 |
| 2288 | BPSL2148 | 39 | 1601624 | 1601118 | 1489299 | 1488793 | 1499353 | 1498847 | 1592204 | 1591698 | 1755310 | 1754804 | 3320906 | 3321412 | 1297451 | 1296945 | 1503566 | 1503060 | 2017846 | 2017340 | 1546724 | 1546218 |
| 2289 | BPSL2149 | 39 | 1602813 | 1601731 | 1490488 | 1489406 | 1500542 | 1499460 | 1593393 | 1592311 | 1756499 | 1755417 | 3319717 | 3320799 | 1298640 | 1297558 | 1504755 | 1503673 | 2019035 | 2017953 | 1547913 | 1546831 |
| 2290 | BPSL2150 | 39 | 1603363 | 1602833 | 1491038 | 1490508 | 1501092 | 1500562 | 1593943 | 1593413 | 1757049 | 1756519 | 3319167 | 3319697 | 1299190 | 1298660 | 1505305 | 1504775 | 2019585 | 2019055 | 1548463 | 1547933 |
| 2291 | BPSL2151 | 39 | 1605710 | 1603404 | 1493385 | 1491079 | 1503439 | 1501133 | 1596290 | 1593984 | 1759396 | 1757090 | 3316820 | 3319126 | 1301537 | 1299231 | 1507652 | 1505346 | 2021932 | 2019626 | 1550810 | 1548504 |
| 2292 | BPSL2152 | 39 | 1607166 | 1605778 | 1494841 | 1493453 | 1504895 | 1503507 | 1597746 | 1596358 | 1760852 | 1759464 | 3315364 | 3316752 | 1302993 | 1301605 | 1509108 | 1507720 | 2023388 | 2022000 | 1552266 | 1550878 |
| 2293 | BPSL2153 | 39 | 1608380 | 1607187 | 1496055 | 1494862 | 1506109 | 1504916 | 1598960 | 1597767 | 1762066 | 1760873 | 3314150 | 3315343 | 1304207 | 1303014 | 1510322 | 1509129 | 2024602 | 2023409 | 1553480 | 1552287 |
| 2294 | BPSL2154 | 39 | 1609216 | 1608398 | 1496891 | 1496073 | 1506945 | 1506127 | 1599796 | 1598978 | 1762902 | 1762084 | 3313314 | 3314132 | 1305043 | 1304225 | 1511158 | 1510340 | 2025438 | 2024620 | 1554316 | 1553498 |
| 2295 | BPSL2155 | 39 | 1609992 | 1609213 | 1497667 | 1496888 | 1507721 | 1506942 | 1600572 | 1599793 | 1763678 | 1762899 | 3312538 | 3313317 | 1305819 | 1305040 | 1511934 | 1511155 | 2026214 | 2025435 | 1555092 | 1554313 |
| 2296 | BPSL2156 | 39 | 1610600 | 1610043 | 1498275 | 1497718 | 1508329 | 1507772 | 1601180 | 1600623 | 1764286 | 1763729 | 3311930 | 3312487 | 1306427 | 1305870 | 1512542 | 1511985 | 2026822 | 2025635 | 1555700 | 1554143 |
| 2297 | BPSL2157 | 39 | 1611404 | 1610694 | 1499079 | 1498369 | 1509133 | 1508423 | 1601984 | 1601274 | 1765090 | 1764380 | 3311126 | 3311836 | 1307231 | 1306521 | 1513346 | 1512636 | 2027626 | 2026916 | 1556504 | 1555794 |
| 2298 | BPSL2158 | 39 | 1612464 | 1611586 | 1500139 | 1499261 | 1510193 | 1509315 | 1603044 | 1602166 | 1766150 | 1765272 | 3310066 | 3310944 | 1308291 | 1307413 | 1514406 | 1513528 | 2028686 | 2027808 | 1557564 | 1556686 |
| 2299 | BPSL2159 | 39 | 1613387 | 1612650 | 1501062 | 1500325 | 1511116 | 1510379 | 1603967 | 1603230 | 1767073 | 1766336 | 3309143 | 3309880 | 1309214 | 1308477 | 1515329 | 1514592 | 2029609 | 2028872 | 1558487 | 1557750 |
| 2300 | BPSL2160 | 39 | 1613869 | 1614681 | 1501544 | 1502356 | 1511598 | 1512410 | 1604449 | 1605261 | 1767555 | 1768367 | 3308661 | 3307849 | 1309696 | 1310508 | 1515811 | 1516623 | 2030091 | 2030903 | 1558969 | 1559781 |
| 2301 | BPSL2161 | 39 | 1614850 | 1617423 | 1502525 | 1505098 | 1512579 | 1515152 | 1605430 | 1608003 | 1768536 | 1771109 | 3307680 | 3305107 | 1310677 | 1313250 | 1516792 | 1519365 | 2031072 | 2033645 | 1559950 | 1562523 |
| 2302 | BPSL2162 | 39 | 1618383 | 1619129 | 1506262 | 1507008 | 1516980 | 1517726 | 1608856 | 1609602 | 1772069 | 1772815 | 3304147 | 3303401 | 1314210 | 1314956 | 1520325 | 1521071 | 2034605 | 2035351 | 1563279 | 1564025 |
| 2303 | BPSL2163 | 39 | 1619860 | 1619330 | 1507739 | 1507209 | 1518457 | 1517927 | 1610333 | 1609803 | 1773546 | 1773016 | 3302670 | 3303200 | 1315687 | 1315157 | 1521802 | 1521272 | 2036082 | 2035552 | 1564756 | 1564226 |
| 2304 | BPSL2164 | 39 | 1621932 | 1619860 | 1509808 | 1507739 | 1520529 | 1518457 | 1612405 | 1610333 | 1775618 | 1773546 | 3300598 | 3302670 | 1317759 | 1315687 | 1523874 | 1521802 | 2038154 | 2036082 | 1565828 | 1564756 |
| 2305 | BPSL2165 | 39 | 1623641 | 1622373 | 1511835 | 1510567 | 1522238 | 1520970 | 1614114 | 1612846 | 1777327 | 1776059 | 3298889 | 3300157 | 1319468 | 1318200 | 1525583 | 1524315 | 2039863 | 2038595 | 1568537 | 1567269 |
| 2306 | BPSL2166 | 39 | 1627220 | 1623711 | 1515414 | 1511905 | 1525817 | 1522308 | 1617693 | 1614184 | 1780906 | 1777397 | 3295310 | 3298819 | 1323047 | 1319538 | 1529162 | 1525653 | 2043442 | 2039933 | 1572116 | 1568607 |
| 2307 | BPSL2167 | 39 | 1628318 | 1627374 | 1516512 | 1515568 | 1526915 | 1525971 | 1618791 | 1617847 | 1782004 | 1781060 | 3294212 | 3295156 | 1324145 | 1323201 | 1530260 | 1529316 | 2044540 | 2043596 | 1573214 | 1572720 |
| 2308 | BPSL2168 | 39 | 1628583 | 1629812 | 1516777 | 1518006 | 1527180 | 1528409 | 1619056 | 1620285 | 1782269 | 1782661 | 3293947 | 3292718 | 1324410 | 1325639 | 1530525 | 1531754 | 2044805 | 2046034 | 1573469 | 1574698 |
| 2309 | BPSL2169 | 39 | 1629872 | 1630696 | 1518066 | 1518890 | 1528469 | 1529293 | 1620345 | 1621169 | 1783560 | 1784384 | 3292658 | 3291834 | 1325699 | 1326523 | 1531814 | 1532638 | 2046094 | 2046918 | 1574758 | 1575582 |
| 2310 | BPSL2170 | 39 | 1630699 | 1631064 | 1518893 | 1519258 | 1529296 | 1529661 | 1621172 | 1621537 | 1784387 | 1784752 | 3291831 | 3291460 | 1326526 | 1326897 | 1532641 | 1533012 | 2046921 | 2047292 | 1575585 | 1575956 |
| 2311 | BPSL2171 | 39 | 1631129 | 1632277 | 1519323 | 1520471 | 1529726 | 1530226 | 1621602 | 1622738 | 1784817 | 1785965 | 3291395 | 3290247 | 1326962 | 1328110 | 1533077 | 1534225 | 2047357 | 2048505 | 1576021 | 1576482 |
| 2312 | BPSL2172 | 39 | 1632294 | 1633214 | 1520488 | 1521408 | 1531289 | 1532209 | 1622755 | 1623675 | 1785982 | 1786902 | 3290230 | 3289310 | 1328127 | 1329047 | 1534242 | 1535162 | 2048522 | 2049442 | 1577322 | 1578242 |
| 2313 | BPSL2173 | 39 |         |         |         |         |         |         |         |         |         |         |         |         |         |         |         |         |         |         |         |         |
| 2314 | BPSL2174 | 39 | 1633400 | 1634836 | 1521594 | 1523030 | 1532395 | 1533831 | 1623861 | 1625297 | 1787088 | 1788524 | 3289124 | 3287688 | 1329233 | 1330669 | 1535348 | 1536784 | 2049628 | 2051064 | 1578428 | 1579864 |
| 2315 | BPSL2175 | 39 | 1635431 | 1634955 | 1523625 | 1523149 | 1534426 | 1533950 | 1625892 | 1625416 | 1789119 | 1788643 | 3287093 | 3287569 | 1331264 | 1330788 | 1537379 | 1536903 | 2051659 | 2051183 | 1580459 | 1579983 |
| 2316 | BPSL2176 | 39 | 1635577 | 1637514 | 1523771 | 1525708 | 1534572 | 1536509 | 1626038 | 1627975 | 1789265 | 1791202 | 3286947 | 3285010 | 1331410 | 1333347 | 1537525 | 1539462 | 2051805 | 2053742 | 1580605 | 1582542 |
| 2317 | BPSL2177 | 39 | 1637937 | 1637608 | 1526131 | 1525802 | 1536932 | 1536603 | 1628398 | 1628069 | 1791625 | 1791296 | 3284587 | 3284916 | 1333770 | 1333441 | 1539885 | 1539556 | 2054165 | 2053836 | 1582965 | 1582636 |
| 2318 | BPSL2178 | 39 | 1639411 | 1638038 | 1527605 | 1526232 | 1538406 | 1537033 | 1629872 | 1628499 | 1793099 | 1791726 | 3283113 | 3284486 | 1335244 | 1333871 | 1541359 | 1539986 | 2055639 | 2054266 | 1584439 | 1583066 |
| 2319 | BPSL2179 | 39 | 1640492 | 1639425 | 1528686 | 1527619 | 1539487 | 1538420 | 1630953 | 1629886 | 1794180 | 1793113 | 3282032 | 3283099 | 1336325 | 1335258 | 1542440 | 1541373 | 2056720 | 2055653 | 1585520 | 1584453 |
| 2320 | BPSL2180 | 39 | 1640704 | 1642008 | 1528898 | 1530202 | 1539699 | 1541003 | 1631165 | 1632469 | 1794392 | 1795696 | 3281820 | 3280516 | 1336537 | 1337841 | 1542652 | 1543956 | 2056932 | 2058236 | 1585732 | 1587036 |
| 2321 | BPSL2181 | 39 | 1642122 | 1642928 | 1530316 | 1531122 | 1541117 | 1541923 | 1632583 | 1633389 | 1795810 | 1796616 | 3280402 | 3279596 | 1337955 | 1338761 | 1544070 | 1544876 | 2058350 | 2059156 | 1587150 | 1587956 |
| 2322 | BPSL2182 | 39 | 1644295 | 1643318 | 1532489 | 1531512 | 1543290 | 1542313 | 1634756 | 1633779 | 1798001 | 1797024 | 3278235 | 3279212 | 1340116 | 1339139 | 1546273 | 1545296 | 2060577 | 2059600 | 1589359 | 1588382 |
| 2323 | BPSL2183 | 39 | 1645146 | 1644295 | 1533313 | 1532489 | 1544141 | 1543290 | 1635574 | 1634756 | 1798852 | 1798001 | 3277384 | 3278235 | 1340967 | 1340116 | 1547124 | 1546273 | 2061428 | 2060577 | 1590210 | 1589359 |
| 2324 | BPSL2184 | 39 | 1646110 | 1645631 | 1534469 | 1533990 | 1545660 | 1545181 | 1636387 | 1635908 | 1799825 | 1799346 | 3276402 | 3276881 | 1341949 | 1341470 | 1548115 | 1547636 | 2062410 | 2061931 | 1591210 | 1590731 |
| 2325 | BPSL2185 | 39 | 1646883 | 1646125 | 1535242 | 1534484 | 1546433 | 1545675 | 1637160 | 1636402 | 1800598 | 1799840 | 3275629 | 3276387 | 1342722 | 1341964 | 1548888 | 1548130 | 2063183 | 2062425 | 1591983 | 1591225 |
| 2326 | BPSL2186 | 39 | 1647053 | 1647319 | 1535412 | 1535678 | 1546603 | 1546869 | 1637330 | 1637596 | 1800768 | 1801034 | 3275459 | 3275193 | 1342892 | 1343158 | 1549058 | 1549324 | 2063353 | 2063619 | 1592153 | 1592419 |
| 2327 | BPSL2187 | 39 | 1647957 | 1649315 | 1536316 | 1537674 | 1547507 | 1548865 | 1638234 | 1639592 | 1801672 | 1803030 | 3274555 | 3273197 | 1343796 | 1345154 | 1549962 | 1551320 | 2064257 | 2065615 | 1593057 | 159441  |

|      |          |    |         |         |         |         |         |         |         |         |         |         |         |         |         |         |         |         |         |         |         |         |
|------|----------|----|---------|---------|---------|---------|---------|---------|---------|---------|---------|---------|---------|---------|---------|---------|---------|---------|---------|---------|---------|---------|
| 2333 | BPSL2192 | 39 | 1655480 | 1657069 | 1543839 | 1545428 | 1555030 | 1556619 | 1645409 | 1645549 | 1809196 | 1810785 | 3267031 | 3265442 | 1351320 | 1352909 | 1557485 | 1559074 | 2071781 | 2073370 | 1600574 | 1602163 |
| 2334 | BPSL2193 | 39 | 1658355 | 1657951 | 1546721 | 1546317 | 1557905 | 1557501 | 1648049 | 1647645 | 1811861 | 1811457 | 3264352 | 3264756 | 1354013 | 1353609 | 1560178 | 1559774 | 2074460 | 2074056 | 1603316 | 1602912 |
| 2335 | BPSL2194 | 39 | 1658900 | 1658406 | 1547266 | 1546772 | 1558450 | 1557956 | 1648594 | 1648100 | 1812406 | 1811912 | 3263807 | 3264301 | 1354558 | 1354064 | 1560723 | 1560229 | 2075005 | 2074511 | 1603861 | 1603367 |
| 2336 | BPSL2195 | 39 | 1659030 | 1659890 | 1547396 | 1547839 | 1558580 | 1559440 | 1648724 | 1649584 | 1812536 | 1813396 | 3263677 | 3262817 | 1354688 | 1355548 | 1560853 | 1561713 | 2075135 | 2075995 | 1603991 | 1604851 |
| 2337 | BPSL2196 | 39 | 1660978 | 1660514 | 1549748 | 1549284 | 1560528 | 1560064 | 1650586 | 1650122 | 1814484 | 1814020 | 3261747 | 3262211 | 1356618 | 1356154 | 1562801 | 1562337 | 2077074 | 2076610 | 1605921 | 1605457 |
| 2338 | BPSL2197 | 39 | 1663179 | 1661773 | 1551949 | 1550543 | 1562451 | 1561045 | 1652787 | 1651381 | 1816685 | 1815279 | 3259546 | 3260952 | 1358819 | 1357413 | 1565002 | 1563596 | 2079275 | 2077869 | 1608122 | 1606716 |
| 2339 | BPSL2198 | 39 | 1663746 | 1664678 | 1552516 | 1553448 | 1563018 | 1563596 | 1653354 | 1654286 | 1817252 | 1818184 | 3258973 | 3258041 | 1359392 | 1360324 | 1565575 | 1566507 | 2079842 | 2080774 | 1608689 | 1609621 |
| 2340 | BPSL2199 | 39 | 1665551 | 1664850 | 1554321 | 1553620 | 1565399 | 1564698 | 1655159 | 1654458 | 1819057 | 1818356 | 3257168 | 3257869 | 1361197 | 1360496 | 1567380 | 1566679 | 2081647 | 2080946 | 1610494 | 1609793 |
| 2341 | BPSL2200 | 39 | 1667336 | 1665690 | 1556106 | 1554460 | 1567184 | 1565538 | 1656944 | 1655298 | 1820842 | 1819196 | 3255383 | 3257029 | 1362982 | 1361336 | 1569165 | 1567519 | 2083432 | 2081786 | 1612279 | 1610633 |
| 2342 | BPSL2201 | 39 | 1668430 | 1667336 | 1557200 | 1556106 | 1568278 | 1567184 | 1658038 | 1656944 | 1821936 | 1820842 | 3254289 | 3255383 | 1364076 | 1362982 | 1570259 | 1569165 | 2084526 | 2083432 | 1613373 | 1612279 |
| 2343 | BPSL2202 | 39 | 1669472 | 1668435 | 1558242 | 1557205 | 1569320 | 1568283 | 1659080 | 1658043 | 1822978 | 1821941 | 3253247 | 3254284 | 1365118 | 1364081 | 1571301 | 1570264 | 2085568 | 2084531 | 1614415 | 1613378 |
| 2344 | BPSL2203 | 39 | 1671613 | 1669664 | 1560383 | 1558434 | 1571461 | 1569512 | 1661221 | 1659272 | 1825119 | 1823170 | 3251106 | 3253055 | 1367259 | 1365310 | 1573442 | 1571493 | 2087709 | 2085760 | 1616556 | 1614607 |
| 2345 | BPSL2204 | 39 | 1671734 | 1672522 | 1560504 | 1561292 | 1571582 | 1572370 | 1661342 | 1662130 | 1825240 | 1826028 | 3250985 | 3250197 | 1367380 | 1368168 | 1573563 | 1574351 | 2087830 | 2088618 | 1616677 | 1617465 |
| 2346 | BPSL2205 | 39 | 1673130 | 1672780 | 1561900 | 1561550 | 1572978 | 1572628 | 1662738 | 1662388 | 1826629 | 1826279 | 3249589 | 3249939 | 1368776 | 1368426 | 1574959 | 1574609 | 2089226 | 2088876 | 1618073 | 1617723 |
| 2347 | BPSL2206 | 39 | 1673384 | 1673602 | 1562154 | 1562372 | 1573232 | 1573450 | 1662992 | 1663210 | 1826883 | 1827101 | 3249335 | 3249117 | 1379630 | 1369248 | 1575213 | 1575431 | 2089480 | 2089698 | 1618327 | 1618545 |
| 2348 | BPSL2207 | 39 | 1676144 | 1673826 | 1564914 | 1562596 | 1575992 | 1573674 | 1665752 | 1663434 | 1829643 | 1827325 | 3246575 | 3248893 | 1371790 | 1369472 | 1577973 | 1575655 | 2092240 | 2089922 | 1621087 | 1618769 |
| 2349 | BPSL2208 | 39 | 1677422 | 1676652 | 1566192 | 1565422 | 1577270 | 1576500 | 1667030 | 1666260 | 1830921 | 1830151 | 3245297 | 3246067 | 1373068 | 1372298 | 1579251 | 1578481 | 2093518 | 2092748 | 1622365 | 1621595 |
| 2350 | BPSL2209 | 39 | 1678419 | 1677433 | 1567189 | 1566203 | 1578267 | 1577281 | 1668027 | 1667041 | 1831918 | 1830932 | 3244738 | 3245286 | 1373627 | 1373079 | 1579810 | 1579262 | 2094515 | 2093529 | 1623362 | 1622376 |
| 2351 | BPSL2210 | 39 | 1678841 | 1678506 | 1567611 | 1567276 | 1578689 | 1578354 | 1668449 | 1668114 | 1832340 | 1832005 | 3243880 | 3244215 | 1374485 | 1374150 | 1580668 | 1580333 | 2094937 | 2094602 | 1623784 | 1623449 |
| 2352 | BPSL2211 | 39 | 1679322 | 1679885 | 1568092 | 1568583 | 1579651 | 1579734 | 1668930 | 1669493 | 1832821 | 1833384 | 3243397 | 3242834 | 1374968 | 1375531 | 1581150 | 1581701 | 2095418 | 2095981 | 1624265 | 1624828 |
| 2353 | BPSL2212 | 39 | 1680780 | 1679965 | 1569709 | 1568924 | 1580629 | 1579814 | 1670388 | 1669573 | 1834279 | 1833464 | 3241939 | 3242754 | 1376426 | 1375611 | 1582609 | 1581794 | 2096876 | 2096601 | 1625723 | 1624908 |
| 2354 | BPSL2213 | 39 | 1681004 | 1680783 | 1569933 | 1569712 | 1580853 | 1580632 | 1670612 | 1670391 | 1834503 | 1834282 | 3241715 | 3241936 | 1376650 | 1376429 | 1582833 | 1582612 | 2097100 | 2096879 | 1625947 | 1625726 |
| 2355 | BPSL2214 | 39 | 1683978 | 1681291 | 1572907 | 1570220 | 1583827 | 1581140 | 1673586 | 1670899 | 1837471 | 1837490 | 3238735 | 3241428 | 1379636 | 1379637 | 1585813 | 1583120 | 2100068 | 2097387 | 1628915 | 1626234 |
| 2356 | BPSL2215 | 39 | 1685122 | 1684061 | 1574051 | 1572990 | 1584971 | 1583910 | 1674730 | 1673669 | 1838615 | 1837554 | 3237591 | 3238652 | 1380780 | 1379719 | 1586957 | 1585896 | 2101212 | 2100151 | 1630059 | 1628998 |
| 2357 | BPSL2216 | 39 | 1686326 | 1685130 | 1575255 | 1574059 | 1586175 | 1584979 | 1675934 | 1674738 | 1839819 | 1838623 | 3236387 | 3237583 | 1381984 | 1380788 | 1588161 | 1586965 | 2102416 | 2101220 | 1631263 | 1630067 |
| 2358 | BPSL2217 | 39 | 1687314 | 1686352 | 1576243 | 1575281 | 1587163 | 1586201 | 1676922 | 1675960 | 1840807 | 1839845 | 3235399 | 3236361 | 1382972 | 1382010 | 1589149 | 1588187 | 2103404 | 2102442 | 1632251 | 1631289 |
| 2359 | BPSL2218 | 39 | 1688288 | 1687473 | 1577217 | 1576402 | 1588137 | 1587322 | 1677896 | 1677081 | 1841781 | 1840966 | 3234425 | 3235240 | 1383946 | 1383131 | 1590123 | 1589308 | 2104378 | 2103563 | 1633225 | 1632410 |
| 2360 | BPSL2219 | 39 | 1689465 | 1688374 | 1578394 | 1577303 | 1589314 | 1588223 | 1679073 | 1677982 | 1842958 | 1841867 | 3233248 | 3234339 | 1385123 | 1384032 | 1591300 | 1590209 | 2105555 | 2104464 | 1634402 | 1633311 |
| 2361 | BPSL2220 | 39 | 1690633 | 1689509 | 1579562 | 1578438 | 1590482 | 1589358 | 1680241 | 1679117 | 1844126 | 1843002 | 3232080 | 3233204 | 1386291 | 1385167 | 1592468 | 1591344 | 2106723 | 2105599 | 1635570 | 1634446 |
| 2362 | BPSL2221 | 39 | 1691803 | 1690688 | 1580732 | 1579617 | 1591652 | 1590537 | 1681411 | 1680296 | 1845296 | 1844181 | 3230910 | 3232025 | 1387461 | 1386346 | 1593638 | 1592523 | 2107893 | 2106778 | 1636740 | 1635625 |
| 2363 | BPSL2222 | 39 | 1692717 | 1691809 | 1581646 | 1580738 | 1592566 | 1591658 | 1682325 | 1681417 | 1846210 | 1845302 | 3229996 | 3230904 | 1388375 | 1387467 | 1594552 | 1593644 | 2108807 | 2107899 | 1637654 | 1636746 |
| 2364 | BPSL2223 | 39 | 1693553 | 1692717 | 1582482 | 1581646 | 1593402 | 1592566 | 1683161 | 1682325 | 1847046 | 1846210 | 3229160 | 3229996 | 1389211 | 1388375 | 1595388 | 1594552 | 2109643 | 2108807 | 1638490 | 1637654 |
| 2365 | BPSL2224 | 39 | 1694592 | 1693561 | 1583521 | 1582490 | 1594441 | 1593410 | 1684200 | 1683169 | 1848085 | 1847054 | 3228121 | 3229152 | 1390250 | 1389219 | 1596427 | 1595396 | 2110682 | 2109651 | 1639529 | 1638498 |
| 2366 | BPSL2225 | 39 | 1695419 | 1694643 | 1584348 | 1583572 | 1595268 | 1594492 | 1685027 | 1684251 | 1848912 | 1848136 | 3227294 | 3228270 | 1391077 | 1390301 | 1597254 | 1596478 | 2111509 | 2110733 | 1640356 | 1639580 |
| 2367 | BPSL2226 | 39 | 1696287 | 1695442 | 1585216 | 1584371 | 1596136 | 1595291 | 1685895 | 1685050 | 1849780 | 1848935 | 3226426 | 3227271 | 1391945 | 1391100 | 1598122 | 1597277 | 2112377 | 2111532 | 1641224 | 1640379 |
| 2368 | BPSL2227 | 39 | 1697235 | 1696360 | 1586164 | 1585289 | 1597084 | 1596209 | 1686843 | 1685968 | 1850728 | 1849853 | 3225478 | 3226353 | 1392893 | 1392018 | 1599070 | 1598195 | 2113325 | 2112450 | 1642172 | 1641297 |
| 2369 | BPSL2228 | 39 | 1698037 | 1697243 | 1586966 | 1586172 | 1597886 | 1597092 | 1687645 | 1686851 | 1851530 | 1850736 | 3224676 | 3225470 | 1393695 | 1392901 | 1599872 | 1599078 | 2114127 | 2113333 | 1642994 | 1642180 |
| 2370 | BPSL2229 | 39 | 1703877 | 1698037 | 1596002 | 1595937 | 1606902 | 1603396 | 1696661 | 1693155 | 1860546 | 1857040 | 3215660 | 3219166 | 1402711 | 1399205 | 1608888 | 1605382 | 2123143 | 2119637 | 1651990 | 1648484 |
| 2371 | BPSL2230 | 39 | 1708453 | 1707056 | 1597402 | 1596005 | 1608302 | 1606906 | 1698061 | 1696664 | 1861946 | 1860549 | 3214260 | 3215657 | 1404111 | 1402714 | 1610288 | 1608891 | 2124538 | 2123465 | 1653385 | 1652312 |
| 2372 | BPSL2231 | 39 | 1709971 | 1708673 | 1598920 | 1597622 | 1609820 | 1608522 | 1699579 | 1698281 | 1863464 | 1862166 | 3212742 | 3214040 | 1405629 | 1404331 | 1611806 | 1610508 | 2126056 | 2124758 | 1654903 | 1653605 |
| 2373 | BPSL2232 | 39 | 1711931 | 1710042 | 1600880 | 1598991 | 1611780 | 1609891 | 1701539 | 1699650 | 1865424 | 1863535 | 3210782 | 3212671 | 1407589 | 1405700 | 1613766 | 1611877 | 2128016 | 2126127 | 1656863 | 1654974 |
| 2374 | BPSL2233 | 39 | 1713418 | 1711931 | 1602367 | 1600880 | 1613267 | 1611780 | 1703026 | 1701539 | 1866911 | 1865424 | 3209295 | 3210782 | 1409076 | 1407589 | 1615253 | 1613766 | 2129503 | 2128016 | 1658350 | 1656863 |
| 2375 | BPSL2234 | 39 | 1714821 | 1716095 | 1603770 | 1605044 | 1614670 | 1615944 | 1704429 | 1705703 | 1868314 | 1869588 | 3207892 | 3206618 | 1410479 | 1411753 | 1616656 | 1617930 | 2130906 | 2132180 | 1659753 | 1661027 |
| 2376 | BPSL2235 | 39 | 1716095 | 1719238 | 1605044 | 1608187 | 1615944 | 1619087 | 1705703 | 1708846 | 1869588 | 1872731 | 3206618 | 3203475 | 1411753 | 1414896 | 1617930 | 1621073 | 2132180 | 2135323 | 1661027 | 1664170 |
| 2377 | BPSL2236 | 39 | 1719319 | 1720536 | 1608268 | 1609461 | 1619168 | 1620361 | 1708927 | 1710120 | 1872812 | 1874005 | 3203394 | 3202177 | 1414977 | 1416194 | 1621154 | 1622347 | 2135404 | 2136603 | 1664251 | 1665444 |
| 2378 | BPSL2237 | 39 | 1722410 | 1720581 | 1611633 | 1609804 | 1622917 | 1621088 | 17120   |         |         |         |         |         |         |         |         |         |         |         |         |         |



|      |          |    |         |         |         |         |         |         |         |         |         |         |         |         |         |         |         |         |         |         |         |         |
|------|----------|----|---------|---------|---------|---------|---------|---------|---------|---------|---------|---------|---------|---------|---------|---------|---------|---------|---------|---------|---------|---------|
| 2384 | BPSL2243 | 39 | 1731489 | 1730095 | 1620712 | 1619318 | 1631996 | 1630602 | 1721113 | 1719719 | 1885034 | 1883640 | 3191217 | 3192611 | 1427147 | 1425753 | 1633404 | 1632010 | 2147569 | 2146175 | 1676464 | 1675070 |
| 2385 | BPSL2244 | 39 | 1731778 | 1732440 | 1621001 | 1621663 | 1632285 | 1632947 | 1721402 | 1722064 | 1885323 | 1885985 | 3190928 | 3190266 | 1427436 | 1428098 | 1633693 | 1634355 | 2147858 | 2148520 | 1676753 | 1677415 |
| 2386 | BPSL2245 | 39 | 1732500 | 1733072 | 1621723 | 1622295 | 1633007 | 1633579 | 1722124 | 1722696 | 1886045 | 1886617 | 3190206 | 3189634 | 1428158 | 1428730 | 1634415 | 1634987 | 2148580 | 2149152 | 1677475 | 1678047 |
| 2387 | BPSL2246 | 39 | 1733156 | 1733644 | 1622379 | 1622867 | 1633663 | 1634151 | 1722780 | 1723268 | 1886701 | 1887189 | 3189550 | 3189062 | 1428814 | 1429302 | 1635071 | 1635559 | 2149236 | 2149724 | 1678131 | 1678619 |
| 2388 | BPSL2247 | 39 | 1733711 | 1734469 | 1622934 | 1623692 | 1634218 | 1634976 | 1723335 | 1724093 | 1887256 | 1888014 | 3188895 | 3188237 | 1429369 | 1430127 | 1635626 | 1636384 | 2149791 | 2150549 | 1678686 | 1679444 |
| 2389 | BPSL2248 | 39 | 1735593 | 1734811 | 1624816 | 1624034 | 1636100 | 1635318 | 1725217 | 1724435 | 1889138 | 1888356 | 3187113 | 3187895 | 1431251 | 1430469 | 1637508 | 1636726 | 2151673 | 2150891 | 1680568 | 1679786 |
| 2390 | BPSL2249 | 39 | 1736695 | 1735787 | 1625918 | 1625010 | 1637202 | 1636294 | 1726319 | 1725411 | 1890240 | 1889332 | 3186011 | 3186919 | 1432353 | 1431445 | 1638610 | 1637702 | 2152775 | 2151867 | 1681670 | 1680762 |
| 2391 | BPSL2250 | 39 | 1736996 | 1737796 | 1626219 | 1627019 | 1637503 | 1638303 | 1726620 | 1727420 | 1890541 | 1891341 | 3185710 | 3184910 | 1432654 | 1433454 | 1638911 | 1639711 | 2153076 | 2153876 | 1681971 | 1682771 |
| 2392 | BPSL2251 | 39 | 1738351 | 1738082 | 1627574 | 1627305 | 1638858 | 1638589 | 1727975 | 1727706 | 1891896 | 1891627 | 3184355 | 3184624 | 1434009 | 1433740 | 1640266 | 1639997 | 2154431 | 2154162 | 1683326 | 1683057 |
| 2393 | BPSL2252 | 39 | 1739693 | 1742365 | 1628916 | 1631588 | 1640200 | 1642872 | 1729317 | 1731989 | 1893238 | 1895910 | 3183013 | 3180341 | 1435351 | 1438023 | 1641608 | 1644280 | 2155773 | 2158445 | 1684668 | 1687340 |
| 2394 | BPSL2253 | 39 | 1742355 | 1743650 | 1631578 | 1632873 | 1642862 | 1644157 | 1731979 | 1733274 | 1895900 | 1897195 | 3180351 | 3179056 | 1438013 | 1439308 | 1644270 | 1645565 | 2158435 | 2159730 | 1687330 | 1688625 |
| 2395 | BPSL2254 | 39 | 1744055 | 1743636 | 1633278 | 1632859 | 1644562 | 1644143 | 1733679 | 1733260 | 1897600 | 1897181 | 3178651 | 3179070 | 1439713 | 1439294 | 1645970 | 1645551 | 2160135 | 2159716 | 1689030 | 1688611 |
| 2396 | BPSL2255 | 39 | 1744270 | 1745430 | 1633493 | 1634653 | 1644777 | 1645937 | 1733894 | 1735054 | 1897815 | 1898975 | 3178436 | 3177276 | 1439928 | 1441088 | 1646185 | 1647345 | 2160350 | 2161510 | 1689245 | 1690405 |
| 2397 | BPSL2256 | 39 | 1746969 | 1746196 | 1636192 | 1635419 | 1647476 | 1646703 | 1736593 | 1735820 | 1900514 | 1899741 | 3175737 | 3176510 | 1442627 | 1441854 | 1648884 | 1648111 | 2163049 | 2162276 | 1691944 | 1691171 |
| 2398 | BPSL2257 | 39 | 1748116 | 1746977 | 1637339 | 1636200 | 1648623 | 1647484 | 1737740 | 1736601 | 1901661 | 1900522 | 3174590 | 3175729 | 1443774 | 1442635 | 1650031 | 1648892 | 2164196 | 2163057 | 1693091 | 1691952 |
| 2399 | BPSL2258 | 39 | 1749129 | 1748230 | 1638352 | 1637453 | 1649636 | 1648737 | 1738753 | 1737854 | 1902674 | 1901775 | 3173577 | 3174476 | 1444787 | 1443888 | 1651044 | 1650145 | 2165209 | 2164310 | 1694104 | 1693205 |
| 2400 | BPSL2259 | 39 | 1749791 | 1749177 | 1639014 | 1638400 | 1650298 | 1649684 | 1739415 | 1738801 | 1903336 | 1902722 | 3172915 | 3173529 | 1445449 | 1444835 | 1651706 | 1651092 | 2165871 | 2165257 | 1694766 | 1694152 |
| 2401 | BPSL2260 | 39 | 1750990 | 1749791 | 1640213 | 1639014 | 1651497 | 1650298 | 1740614 | 1739415 | 1904535 | 1903336 | 3171716 | 3172915 | 1446648 | 1445449 | 1652905 | 1651706 | 2167070 | 2165871 | 1695965 | 1694766 |
| 2402 | BPSL2261 | 39 | 1751664 | 1751002 | 1640887 | 1640225 | 1652171 | 1651509 | 1741288 | 1740626 | 1905209 | 1904547 | 3171042 | 3171704 | 1447322 | 1446660 | 1653579 | 1652917 | 2167744 | 2167082 | 1696639 | 1695977 |
| 2403 | BPSL2262 | 39 | 1752392 | 1751766 | 1641615 | 1640989 | 1652899 | 1652273 | 1742016 | 1741390 | 1905937 | 1905311 | 3170314 | 3170940 | 1448050 | 1447424 | 1654307 | 1653681 | 2168472 | 2167846 | 1697367 | 1696741 |
| 2404 | BPSL2263 | 39 | 1753296 | 1752460 | 1642519 | 1641683 | 1653803 | 1652967 | 1742920 | 1742084 | 1906841 | 1906005 | 3169410 | 3170246 | 1448954 | 1448118 | 1655211 | 1654375 | 2169376 | 2168540 | 1698271 | 1697435 |
| 2405 | BPSL2264 | 39 | 1754411 | 1753524 | 1643634 | 1642747 | 1654918 | 1654031 | 1744035 | 1743148 | 1907956 | 1907069 | 3168295 | 3169182 | 1450069 | 1449182 | 1656326 | 1655439 | 2170491 | 2169604 | 1699386 | 1698499 |
| 2406 | BPSL2265 | 39 | 1755418 | 1754570 | 1644641 | 1643793 | 1655925 | 1655077 | 1745042 | 1744194 | 1908963 | 1908115 | 3176288 | 3168136 | 1451076 | 1450228 | 1657333 | 1656485 | 2171498 | 2170650 | 1700393 | 1699545 |
| 2407 | BPSL2266 | 39 | 1755595 | 1756116 | 1644818 | 1645339 | 1656102 | 1656623 | 1745219 | 1745740 | 1909140 | 1909661 | 3167111 | 3166590 | 1451253 | 1451774 | 1657510 | 1658031 | 2171675 | 2172196 | 1700570 | 1701091 |
| 2408 | BPSL2267 | 39 | 1756158 | 1757105 | 1645381 | 1646328 | 1656665 | 1657612 | 1745782 | 1746729 | 1909703 | 1910650 | 3166548 | 3165601 | 1451816 | 1452763 | 1658073 | 1659020 | 2172238 | 2173185 | 1701133 | 1702080 |
| 2409 | BPSL2268 | 39 | 1757192 | 1757524 | 1646415 | 1646747 | 1657699 | 1658031 | 1746816 | 1747148 | 1910737 | 1911069 | 3165514 | 3165182 | 1452850 | 1453182 | 1659107 | 1659439 | 2173272 | 2173604 | 1702167 | 1702499 |
| 2410 | BPSL2269 | 39 | 1758184 | 1757756 | 1647407 | 1646979 | 1658691 | 1658263 | 1747808 | 1747380 | 1911729 | 1911301 | 3164522 | 3164950 | 1453842 | 1453414 | 1660099 | 1659671 | 2174264 | 2173386 | 1703159 | 1702731 |
| 2411 | BPSL2270 | 39 | 1759559 | 1758279 | 1648782 | 1647502 | 1660066 | 1658786 | 1749183 | 1747903 | 1913104 | 1911824 | 3163147 | 3164427 | 1455217 | 1453937 | 1661474 | 1660194 | 2175639 | 2174359 | 1704534 | 1703254 |
| 2412 | BPSL2271 | 39 | 1760517 | 1759666 | 1649740 | 1648889 | 1661024 | 1660173 | 1750141 | 1749290 | 1914062 | 1913211 | 3162189 | 3163040 | 1456175 | 1455324 | 1662432 | 1661581 | 2176597 | 2175746 | 1705492 | 1704641 |
| 2413 | BPSL2272 | 39 | 1762175 | 1760517 | 1651398 | 1649740 | 1662682 | 1661024 | 1751799 | 1750141 | 1915720 | 1914062 | 3160531 | 3162189 | 1457833 | 1456175 | 1664090 | 1662432 | 2178255 | 2176597 | 1707150 | 1705492 |
| 2414 | BPSL2273 | 39 | 1763259 | 1762435 | 1652482 | 1651658 | 1663766 | 1662942 | 1752883 | 1752059 | 1916804 | 1915980 | 3159447 | 3160271 | 1458917 | 1458093 | 1665174 | 1664350 | 2179339 | 2178515 | 1708234 | 1707410 |
| 2415 | BPSL2274 | 39 | 1765866 | 1763299 | 1655877 | 1654108 | 1667003 | 1665735 | 1755490 | 1752923 | 1919411 | 1916844 | 3156840 | 3159407 | 1461524 | 1458957 | 1667781 | 1665214 | 2181946 | 2179379 | 1710287 | 1709466 |
| 2416 | BPSL2275 | 39 | 1766665 | 1765880 | 1656676 | 1655891 | 1667802 | 1667017 | 1756289 | 1755504 | 1920210 | 1919425 | 3156041 | 3156826 | 1462323 | 1461538 | 1668580 | 1667795 | 2182745 | 2181960 | 1711086 | 1710301 |
| 2417 | BPSL2276 | 39 | 1767392 | 1766673 | 1657403 | 1656684 | 1668529 | 1667810 | 1757016 | 1756297 | 1920937 | 1920218 | 3155314 | 3156033 | 1463050 | 1462331 | 1669307 | 1668588 | 2183472 | 2182753 | 1711813 | 1711094 |
| 2418 | BPSL2277 | 39 | 1768665 | 1767415 | 1658676 | 1657426 | 1669802 | 1668552 | 1758289 | 1757039 | 1922210 | 1920960 | 3154041 | 3155291 | 1464323 | 1463073 | 1670580 | 1669330 | 2184745 | 2183495 | 1713086 | 1711836 |
| 2419 | BPSL2278 | 39 | 1769237 | 1770310 | 1659248 | 1660321 | 1670374 | 1671033 | 1758861 | 1759934 | 1922782 | 1923855 | 3153469 | 3152396 | 1464895 | 1465968 | 1671152 | 1672225 | 2185317 | 2186390 | 1713658 | 1714731 |
| 2420 | BPSL2279 | 39 | 1770329 | 1772020 | 1660340 | 1662031 | 1672178 | 1673869 | 1759953 | 1761644 | 1923874 | 1925565 | 3152377 | 3150686 | 1465987 | 1467678 | 1672244 | 1673935 | 2186409 | 2188100 | 1714750 | 1716441 |
| 2421 | BPSL2280 | 39 | 1772386 | 1773489 | 1662397 | 1663500 | 1674235 | 1675338 | 1762010 | 1763113 | 1925931 | 1927034 | 3150320 | 3149217 | 1468044 | 1469147 | 1674301 | 1675404 | 2188466 | 2189569 | 1716807 | 1717910 |
| 2422 | BPSL2281 | 39 | 1773585 | 1775108 | 1663596 | 1665119 | 1675434 | 1676957 | 1763209 | 1764732 | 1927130 | 1928653 | 3149121 | 3147598 | 1469243 | 1470766 | 1675500 | 1677023 | 2189665 | 2191188 | 1718006 | 1719529 |
| 2423 | BPSL2282 | 39 | 1775471 | 1776193 | 1665482 | 1666204 | 1677320 | 1678042 | 1765095 | 1765817 | 1929016 | 1929738 | 3147227 | 3146505 | 1471137 | 1471859 | 1677394 | 1678116 | 2191551 | 2192273 | 1719892 | 1720614 |
| 2424 | BPSL2283 | 39 | 1776819 | 1776613 | 1666830 | 1666624 | 1678668 | 1678462 | 1766443 | 1766237 | 1930364 | 1930158 | 3145879 | 3146085 | 1472485 | 1472279 | 1678742 | 1678536 | 2192899 | 2192693 | 1721240 | 1721034 |
| 2425 | BPSL2284 | 39 | 1777179 | 1776841 | 1667190 | 1666852 | 1679028 | 1678690 | 1766803 | 1766465 | 1930724 | 1930386 | 3145519 | 3145857 | 1472845 | 1472507 | 1679102 | 1678764 | 2193259 | 2192921 | 1721600 | 1721262 |
| 2426 | BPSL2285 | 39 | 1779140 | 1777275 | 1669151 | 1667286 | 1680989 | 1679124 | 1768764 | 1766899 | 1932685 | 1930820 | 3143558 | 3145423 | 1474806 | 1472941 | 1681063 | 1679198 | 2195220 | 2193355 | 1723561 | 1721696 |
| 2427 | BPSL2286 | 39 | 1779733 | 1779209 | 1669744 | 1669220 | 1681582 | 1681058 | 1769357 | 1768833 | 1933278 | 1932754 | 3142965 | 3143489 | 1475399 | 1474875 | 1681656 | 1681132 | 2195813 | 2195289 | 1724154 | 1723630 |
| 2428 | BPSL2287 | 39 | 1780169 | 1779849 | 1670180 | 1669860 | 1682018 | 1681698 | 1769793 | 1769473 | 1933714 | 1933394 | 3142529 | 3142849 | 1475835 | 1475515 | 1682092 | 1681772 | 2196249 | 2195929 | 1724590 | 1724270 |
| 2429 | BPSL2288 | 39 | 1780659 | 1780255 | 1670670 | 1670266 | 1682508 | 1682104 | 17702   |         |         |         |         |         |         |         |         |         |         |         |         |         |



|               |    |        |        |        |        |        |        |        |        |        |        |         |         |         |         |         |         |         |         |        |        |
|---------------|----|--------|--------|--------|--------|--------|--------|--------|--------|--------|--------|---------|---------|---------|---------|---------|---------|---------|---------|--------|--------|
| 2486 BPSL2336 | 42 | 681251 | 682582 | 558111 | 559442 | 561369 | 562700 | 676210 | 677541 | 717475 | 718806 | 2954001 | 2955332 | 1664389 | 1663058 | 1870286 | 1868955 | 2359633 | 2358302 | 650284 | 651615 |
| 2487 BPSL2337 | 42 | 680427 | 681215 | 557287 | 558075 | 560545 | 561333 | 675386 | 676174 | 716651 | 717439 | 2953177 | 2953965 | 1665213 | 1664425 | 1871110 | 1870322 | 2360457 | 2359669 |        |        |
| 2488 BPSL2338 | 42 | 678605 | 679405 | 555465 | 556265 | 558723 | 559523 | 673564 | 674364 | 714829 | 715629 | 2951355 | 2952155 | 1667035 | 1666235 | 1872932 | 1872132 | 2362279 | 2361479 | 647626 | 648426 |
| 2489 BPSL2339 | 42 | 676979 | 678358 | 553839 | 555218 | 557097 | 558476 | 671938 | 673317 | 713203 | 714582 | 2949729 | 2951108 | 1668661 | 1667282 | 1874558 | 1873179 | 2363905 | 2362526 | 646000 | 647379 |
| 2490 BPSL2340 | 42 | 675742 | 676962 | 552602 | 553822 | 555860 | 557080 | 670701 | 671921 | 711966 | 713186 | 2948492 | 2949712 | 1669898 | 1668678 | 1875795 | 1874575 | 2365142 | 2363922 | 644763 | 645983 |
| 2491 BPSL2341 | 42 | 675086 | 675742 | 551946 | 552602 | 555204 | 555860 | 670045 | 670701 | 711310 | 711966 | 2947836 | 2948492 | 1670554 | 1669898 | 1876451 | 1875795 | 2365798 | 2365142 | 644107 | 644763 |
| 2492 BPSL2342 | 42 | 673398 | 675083 | 550258 | 551943 | 553516 | 555201 | 668357 | 670042 | 709622 | 711307 | 2946148 | 2947833 | 1672242 | 1670557 | 1878139 | 1876454 | 2367486 | 2365801 | 642419 | 644104 |
| 2493 BPSL2343 | 42 | 672660 | 673352 | 549520 | 550212 | 552778 | 553470 | 667619 | 668311 | 708884 | 709576 | 2945410 | 2946102 | 1672980 | 1672288 | 1878877 | 1878185 | 2368224 | 2367532 | 641681 | 642373 |
| 2494 BPSL2344 | 42 | 671132 | 672652 | 547992 | 549512 | 551250 | 552770 | 666091 | 667611 | 707356 | 708876 | 2943882 | 2945402 | 1674508 | 1672988 | 1880405 | 1878885 | 2369752 | 2368232 | 640153 | 641673 |
| 2495 BPSL2345 | 42 | 669672 | 670460 | 546532 | 547320 | 549790 | 550578 | 664631 | 665419 | 705896 | 706684 | 2942422 | 2943210 | 1675968 | 1675180 | 1881865 | 1881077 | 2371212 | 2370424 | 638693 | 639481 |
| 2496 BPSL2346 | 42 | 668557 | 669564 | 545417 | 546424 | 548675 | 549682 | 663516 | 664523 | 704781 | 705788 | 2941307 | 2942314 | 1677083 | 1676076 | 1882980 | 1881973 | 2372327 | 2371320 | 637578 | 638585 |
| 2497 BPSL2347 | 42 | 666614 | 667336 | 543474 | 544196 | 546143 | 546865 | 661573 | 662295 | 702832 | 703554 | 2939370 | 2940092 | 1679026 | 1678304 | 1884923 | 1884201 | 2374276 | 2373554 | 635635 | 636357 |
| 2498 BPSL2348 | 42 | 665092 | 665760 | 541952 | 542620 | 544621 | 545289 | 660051 | 660719 | 701310 | 701978 | 2937848 | 2938516 | 1680548 | 1679880 | 1886445 | 1885777 | 2375798 | 2375130 | 634113 | 634781 |
| 2499 BPSL2349 | 42 | 663550 | 665007 | 540410 | 541867 | 543079 | 544536 | 658509 | 659966 | 699768 | 701225 | 2936306 | 2937763 | 1682090 | 1680633 | 1887987 | 1886530 | 2377340 | 2375883 | 632602 | 632991 |
| 2500 BPSL2350 | 42 | 663131 | 661968 | 539991 | 538828 | 542660 | 541497 | 658090 | 656927 | 699349 | 698186 | 2935887 | 2934724 | 1682509 | 1683672 | 1888406 | 1889569 | 2377759 | 2378922 | 632183 | 631020 |
| 2501 BPSL2351 | 42 | 661243 | 658958 | 538103 | 535818 | 540772 | 538487 | 656202 | 653917 | 697461 | 695176 | 2933999 | 2931714 | 1684397 | 1686682 | 1890294 | 1892447 | 2379647 | 2381932 | 630295 | 628010 |
| 2502 BPSL2352 | 42 | 658670 | 658533 | 535722 | 535525 | 537718 | 537521 | 653819 | 653622 | 695017 | 694820 | 2931631 | 2931434 | 1686765 | 1686962 | 1892740 | 1892937 | 2382015 | 2382212 | 627730 | 627533 |
| 2503 BPSL2354 | 42 | 658477 | 657347 | 535324 | 534194 | 537320 | 536190 | 653421 | 652291 | 694619 | 693489 | 2931233 | 2930103 | 1687163 | 1688293 | 1893138 | 1894268 | 2382413 | 2383543 | 627332 | 626202 |
| 2504 BPSL2355 | 42 | 657207 | 655987 | 534054 | 532834 | 536050 | 534830 | 652151 | 650931 | 693349 | 692129 | 2929963 | 2928743 | 1688433 | 1689653 | 1894408 | 1895628 | 2383683 | 2384903 | 626062 | 624842 |
| 2505 BPSL2356 | 42 | 655386 | 653626 | 532233 | 530473 | 534229 | 532469 | 650330 | 648570 | 691528 | 689768 | 2928142 | 2926382 | 1690254 | 1692014 | 1896229 | 1897989 | 2385504 | 2387264 | 624241 | 622481 |
| 2506 BPSL2357 | 42 | 653620 | 653411 | 530467 | 530258 | 532463 | 532254 | 648564 | 648355 | 689762 | 689553 | 2926376 | 2926167 | 1692020 | 1692229 | 1897995 | 1898204 | 2387270 | 2387479 | 622475 | 622266 |
| 2507 BPSL2358 | 42 | 653389 | 652673 | 530236 | 529520 | 532232 | 531516 | 648333 | 647617 | 689531 | 688815 | 2926145 | 2925429 | 1692251 | 1692967 | 1898226 | 1898507 | 2387501 | 2388217 | 622244 | 621528 |
| 2508 BPSL2359 | 42 | 651969 | 652412 | 528816 | 529259 | 530812 | 531255 | 646913 | 647356 | 688111 | 688554 | 2924725 | 2925168 | 1693671 | 1693328 | 1899647 | 1899204 | 2388782 | 2388478 | 620824 | 621267 |
| 2509 BPSL2360 | 42 | 651450 | 651926 | 528297 | 528773 | 530293 | 530769 | 646394 | 646870 | 687592 | 688068 | 2924206 | 2924682 | 1694190 | 1693714 | 1900166 | 1899690 | 2389440 | 2388964 | 620305 | 620781 |
| 2510 BPSL2361 | 42 | 650509 | 651393 | 527356 | 528240 | 529352 | 530236 | 645453 | 646337 | 686649 | 687533 | 2923263 | 2924147 | 1695133 | 1694249 | 1901109 | 1900225 | 2390383 | 2389499 | 619362 | 620246 |
| 2511 BPSL2362 | 42 | 649434 | 650465 | 526281 | 527312 | 528277 | 529308 | 644378 | 645409 | 685574 | 686605 | 2922188 | 2923219 | 1696208 | 1695177 | 1902184 | 1901153 | 2391458 | 2390427 | 618287 | 619318 |
| 2512 BPSL2363 | 42 | 648128 | 649342 | 524975 | 526189 | 526971 | 528185 | 643072 | 644286 | 684268 | 685482 | 2920882 | 2922096 | 1697494 | 1696280 | 1903490 | 1902276 | 2392764 | 2391550 | 616981 | 618195 |
| 2513 BPSL2364 | 42 | 647908 | 646595 | 524755 | 523442 | 526751 | 525438 | 642852 | 641539 | 684048 | 682735 | 2920662 | 2919349 | 1697714 | 1699027 | 1903710 | 1905023 | 2392984 | 2394297 | 616761 | 615448 |
| 2514 BPSL2365 | 42 | 645923 | 646612 | 522770 | 523459 | 524766 | 525455 | 640867 | 641556 | 682063 | 682752 | 2918677 | 2919366 | 1699699 | 1699010 | 1905695 | 1905006 | 2394969 | 2394280 | 614776 | 615465 |
| 2515 BPSL2366 | 42 | 644469 | 645911 | 521316 | 522758 | 523312 | 524754 | 639413 | 640855 | 680609 | 682051 | 2917223 | 2918665 | 1701153 | 1699711 | 1907149 | 1905707 | 2396423 | 2394981 | 613322 | 614764 |
| 2516 BPSL2367 | 42 | 642392 | 644311 | 519239 | 521158 | 521235 | 523154 | 637336 | 639255 | 678532 | 680451 | 2915146 | 2917065 | 1703230 | 1701311 | 1909227 | 1908220 | 2398500 | 2396581 | 611245 | 613164 |
| 2517 BPSL2368 | 42 | 641858 | 640665 | 518705 | 517512 | 520701 | 519508 | 636802 | 635609 | 677998 | 676805 | 2914612 | 2913419 | 1703764 | 1704957 | 1909761 | 1910954 | 2399034 | 2400227 | 610711 | 609518 |
| 2518 BPSL2369 | 42 | 640173 | 639022 | 517020 | 515869 | 519016 | 517865 | 635117 | 633966 | 676313 | 675162 | 2912927 | 2911776 | 1705449 | 1706600 | 1911446 | 1912597 | 2400719 | 2401870 | 609026 | 607875 |
| 2519 BPSL2370 | 42 | 638468 | 638124 | 515315 | 514971 | 517311 | 516967 | 633412 | 633068 | 674608 | 674264 | 2911222 | 2910878 | 1707154 | 1707498 | 1913151 | 1913495 | 2402424 | 2402768 | 607321 | 606977 |
| 2520 BPSL2371 | 42 | 638116 | 636884 | 514963 | 513731 | 516959 | 515727 | 633060 | 631828 | 674256 | 673024 | 2910870 | 2909638 | 1707506 | 1708738 | 1913503 | 1914735 | 2402776 | 2404008 | 606969 | 605737 |
| 2521 BPSL2372 | 42 | 636879 | 635650 | 513726 | 512497 | 515722 | 514493 | 631823 | 630594 | 673019 | 671790 | 2909633 | 2908404 | 1708743 | 1709972 | 1914740 | 1915969 | 2404013 | 2405242 | 605732 | 604503 |
| 2522 BPSL2373 | 42 | 635650 | 635162 | 512497 | 512009 | 514493 | 514005 | 630594 | 630106 | 671790 | 671302 | 2908404 | 2907916 | 1709972 | 1710460 | 1915969 | 1916457 | 2405242 | 2405730 | 604503 | 604015 |
| 2523 BPSL2374 | 42 | 635162 | 634617 | 512009 | 511464 | 514005 | 513460 | 630106 | 629561 | 671302 | 670757 | 2907916 | 2907371 | 1710460 | 1711005 | 1916457 | 1917002 | 2405730 | 2406275 | 604015 | 603470 |
| 2524 BPSL2375 | 42 | 634020 | 634316 | 510867 | 511163 | 512863 | 513159 | 628964 | 629260 | 670160 | 670456 | 2906774 | 2907070 | 1711602 | 1711306 | 1917599 | 1917303 | 2406872 | 2406576 | 602873 | 603169 |
| 2525 BPSL2376 | 42 | 633829 | 633344 | 510676 | 510191 | 512672 | 512187 | 628773 | 628288 | 669969 | 669484 | 2906583 | 2906098 | 1711793 | 1712278 | 1917790 | 1918275 | 2407063 | 2407548 | 602682 | 602197 |
| 2526 BPSL2377 | 42 | 632678 | 633124 | 509525 | 509971 | 511521 | 511967 | 627622 | 628068 | 668810 | 669256 | 2905432 | 2905878 | 1712932 | 1712498 | 1918949 | 1918503 | 2408214 | 2407768 | 601531 | 601977 |
| 2527 BPSL2378 | 42 | 632299 | 631412 | 509146 | 508259 | 511142 | 510255 | 627243 | 626356 | 668431 | 667544 | 2905053 | 2904166 | 1713311 | 1714198 | 1919328 | 1920215 | 2408593 | 2409480 | 601152 | 602265 |
| 2528 BPSL2379 | 42 | 631405 | 631121 | 508252 | 507968 | 510248 | 509964 | 626349 | 626065 | 667537 | 667253 | 2904159 | 2903875 | 1714205 | 1714489 | 1920222 | 1920506 | 2409487 | 2409771 | 600258 | 599974 |
| 2529 BPSL2380 | 42 | 629124 | 628810 | 506260 | 505976 | 508256 | 507972 | 624357 | 624073 | 665545 | 665261 | 2902167 | 2901883 | 1716197 | 1716481 | 1922214 | 1922498 | 2411479 | 2411763 | 598266 | 597982 |
| 2530 BPSL2381 | 42 | 628806 | 628477 | 505653 | 505324 | 507649 | 507320 | 623750 | 623421 | 664938 | 664609 | 2901560 | 2901231 | 1716804 | 1717133 | 1922281 | 1923150 | 2412086 | 2412415 | 597659 | 597330 |
| 2531 BPSL2382 | 42 | 628320 | 627091 | 505167 | 503938 | 507163 | 505934 | 623264 | 622035 | 664452 | 663223 | 2901074 | 2899845 | 1717290 | 1718519 | 1923307 | 1924536 | 2412572 | 2413801 | 597173 | 595944 |
| 2532 BPSL2383 | 42 | 626022 | 626813 | 502869 | 503660 | 504865 | 505656 | 620966 | 621757 | 662147 | 662938 | 2898783 | 2899574 | 1719581 | 1718790 | 1925598 | 1924807 | 2414877 | 2414086 | 594854 | 595645 |
| 2533 BPSL2384 | 42 | 625701 | 625261 | 502548 | 502108 | 504544 | 504104 | 620645 | 620205 | 661826 | 661386 | 2898462 | 2898022 | 1719902 | 1720342 | 1925919 | 1926359 | 2415198 | 2415638 | 594533 | 594093 |
| 2534 BPSL2385 | 42 | 624162 | 625208 | 501009 | 502055 |        |        |        |        |        |        |         |         |         |         |         |         |         |         |        |        |

|                                    |    |                   |        |        |        |        |        |        |        |        |        |         |         |         |         |         |         |         |         |         |        |        |
|------------------------------------|----|-------------------|--------|--------|--------|--------|--------|--------|--------|--------|--------|---------|---------|---------|---------|---------|---------|---------|---------|---------|--------|--------|
| 2537 BPSL2388                      | 42 | 620325            | 621353 | 497172 | 498200 | 499168 | 500196 | 615269 | 616297 | 656450 | 657478 | 2893100 | 2894128 | 1725264 | 1724236 | 1931281 | 1930253 | 2420574 | 2419546 | 589157  | 590185 |        |
| 2538 BPSL2389                      | 42 | 619288            | 620325 | 496135 | 497172 | 498131 | 499168 | 614232 | 615269 | 655413 | 656450 | 2892063 | 2893100 | 1726301 | 1725264 | 1932318 | 1931281 | 2421611 | 2420574 | 588120  | 589157 |        |
| 2539 BPSL2390                      | 42 | 618010            | 619239 | 494857 | 496086 | 496853 | 498082 | 612954 | 614183 | 654135 | 655364 | 2890785 | 2892014 | 1727579 | 1726350 | 1933596 | 1932367 | 2422889 | 2421660 | 586842  | 588071 |        |
| 2540 BPSL2391                      | 42 | 616223            | 617266 | 493070 | 494113 | 495066 | 496109 | 611167 | 612210 | 652348 | 653391 | 2888998 | 2890041 | 1729367 | 1728324 | 1935383 | 1934340 | 2424676 | 2423633 | 585055  | 586098 |        |
| 2541 BPSL2392                      | 42 | 615410            | 616201 | 492257 | 493048 | 494253 | 495044 | 610354 | 611145 | 651535 | 652326 | 2888185 | 2888976 | 1730180 | 1729389 | 1936196 | 1935405 | 2425489 | 2424698 | 584242  | 585033 |        |
| 2542 BPSL2393                      | 42 | 614675            | 615385 | 491522 | 492232 | 493518 | 494228 | 609619 | 610329 | 650800 | 651510 | 2887450 | 2888160 | 1730915 | 1730205 | 1936931 | 1936221 | 2426224 | 2425514 | 583507  | 584217 |        |
| 2543 BPSL2394                      | 42 | 614589            | 614675 | 491436 | 491522 | 493432 | 493518 | 609533 | 609619 | 650714 | 650800 | 2887364 | 2887450 | 1731001 | 1730915 | 1937017 | 1936931 | 2426310 | 2426224 | 583421  | 583507 |        |
| 2544 BPSL2395_putative lipoprotein | 42 |                   |        |        |        |        |        |        |        |        |        |         |         |         |         |         |         |         |         |         |        |        |
| 2545                               |    | Chr1_113_IS407A_A | 613104 | 614339 | 489951 | 491186 | 491947 | 493182 | 608048 | 609283 | 649478 | 650713  | 2886128 | 2887363 | 1731002 | 1732237 | 1937018 | 1938253 | 2426311 | 2427546 | 582185 | 583420 |
| 2546 BPSL2396                      | 43 | 601822            | 600779 | 478669 | 477626 | 480665 | 479622 | 596766 | 595723 | 638215 | 637172 | 2874879 | 2873836 | 1743480 | 1744523 | 1949502 | 1950545 |         |         | 581060  | 582103 |        |
| 2547 BPSL2397                      | 43 | 602706            | 601822 | 479553 | 478669 | 481549 | 480665 | 597650 | 596766 | 639099 | 638215 | 2875763 | 2874879 | 1742596 | 1743480 | 1948618 | 1949502 |         |         | 580176  | 581060 |        |
| 2548 BPSL2398                      | 43 | 604131            | 602713 | 480978 | 479560 | 482974 | 481556 | 599075 | 597657 | 640524 | 639106 | 2877188 | 2875770 | 1741171 | 1742589 | 1947193 | 1948611 |         |         | 578751  | 580169 |        |
| 2549 BPSL2399                      | 43 | 605421            | 604246 | 482268 | 481093 | 484264 | 483089 | 600365 | 599190 | 641814 | 640639 | 2878478 | 2877303 | 1739881 | 1741056 | 1945903 | 1947078 |         |         | 577461  | 578636 |        |
| 2550 BPSL2400                      | 43 | 606048            | 607103 | 482895 | 483950 | 484891 | 485946 | 600992 | 602047 | 642441 | 643496 | 2879105 | 2880160 | 1739254 | 1738199 | 1945276 | 1944221 |         |         | 576834  | 575779 |        |
| 2551 BPSL2401                      | 43 | 608570            | 607545 | 485417 | 484392 | 487413 | 486388 | 603514 | 602489 | 644956 | 643931 | 2881606 | 2880581 | 1736753 | 1737778 | 1942775 | 1943800 |         |         | 574305  | 575330 |        |
| 2552 BPSL2402                      | 43 | 609093            | 609953 | 485940 | 486800 | 487936 | 488796 | 604037 | 604897 | 645467 | 646327 | 2882117 | 2882977 | 1736248 | 1735388 | 1942264 | 1941404 |         |         | 573794  | 572934 |        |
| 2553 BPSL2403                      | 43 | 610626            | 612725 | 487473 | 489572 | 489469 | 491568 | 605570 | 607669 | 647000 | 649099 | 2883650 | 2885749 | 1734715 | 1732616 | 1940731 | 1938632 |         |         | 572235  | 571408 |        |
| 2554                               |    | Chr1_114_IS407A_A | 599462 | 600697 | 476309 | 477544 | 478305 | 479540 | 594406 | 595641 | 635855 | 637090  | 2872519 | 2873754 | 1744605 | 1745840 | 1950627 | 1951862 | 2426311 | 2427546 | 570173 | 571408 |
| 2555 BPSL2404                      | 44 | 598801            | 597656 | 475648 | 474503 | 477644 | 476499 | 593745 | 592600 | 635187 | 634042 | 2871858 | 2870713 | 1746508 | 1747653 | 1952523 | 1953668 | 2428207 | 2429352 | 569512  | 568367 |        |
| 2556 BPSL2405                      | 44 | 597554            | 596385 | 474401 | 473232 | 476397 | 475228 | 592498 | 591329 | 633940 | 632771 | 2870611 | 2869442 | 1747755 | 1748924 | 1953770 | 1954939 | 2429454 | 2430623 | 568265  | 567096 |        |
| 2557 BPSL2406                      | 44 | 595817            | 596269 | 472664 | 473116 | 474660 | 475112 | 590761 | 591213 | 632203 | 632655 | 2868828 | 2869286 | 1749538 | 1749080 | 1955553 | 1955095 | 2431237 | 2430779 | 566482  | 566940 |        |
| 2558 BPSL2407                      | 44 | 594829            | 595758 | 471766 | 472605 | 473672 | 474601 | 590481 | 590702 | 631217 | 631654 | 2867813 | 2868769 | 1750553 | 1749597 | 1956568 | 1955612 | 2432252 | 2431296 | 565467  | 566423 |        |
| 2559 BPSL2408                      | 44 | 593498            | 594559 | 471345 | 471406 | 472341 | 473402 | 588520 | 589581 | 629886 | 630947 | 2866482 | 2867543 | 1751884 | 1750823 | 1957899 | 1956838 | 2433583 | 2432522 | 564136  | 565197 |        |
| 2560 BPSL2409                      | 44 | 592933            | 591071 | 469780 | 467918 | 471776 | 469914 | 587955 | 586093 | 629321 | 627459 | 2865917 | 2864055 | 1752449 | 1754311 | 1958464 | 1960326 | 2434148 | 2436010 | 563571  | 561709 |        |
| 2561 BPSL2410                      | 44 | 589630            | 591036 | 466477 | 467883 | 468473 | 469879 | 584652 | 586058 | 626018 | 627424 | 2862614 | 2864200 | 1755752 | 1754346 | 1961767 | 1960361 | 2437451 | 2436405 | 560268  | 561674 |        |
| 2562 BPSL2411                      | 44 | 588824            | 589630 | 465671 | 466477 | 467667 | 468473 | 583846 | 584652 | 625212 | 626018 | 2861808 | 2862614 | 1756558 | 1755752 | 1962573 | 1961767 | 2438257 | 2437451 | 559462  | 560268 |        |
| 2563 BPSL2412                      | 44 | 588464            | 587808 | 465311 | 466455 | 467307 | 466651 | 583486 | 582830 | 624852 | 624196 | 2861448 | 2860792 | 1756918 | 1757574 | 1962933 | 1963589 | 2438617 | 2439273 | 559102  | 558446 |        |
| 2564 BPSL2413                      | 44 | 587778            | 587335 | 464625 | 464182 | 466621 | 466178 | 582800 | 582357 | 624166 | 623723 | 2860762 | 2860319 | 1757604 | 1758047 | 1963619 | 1964062 | 2439303 | 2439746 | 558416  | 557973 |        |
| 2565 BPSL2414                      | 44 | 587321            | 586452 | 464168 | 463299 | 466164 | 465295 | 582343 | 581474 | 623709 | 622840 | 2860305 | 2859436 | 1758061 | 1758930 | 1964076 | 1964945 | 2439760 | 2440629 | 557959  | 557090 |        |
| 2566 BPSL2415                      | 44 | 585812            | 586312 | 462659 | 463159 | 464655 | 465155 | 580834 | 581334 | 622200 | 622700 | 2858796 | 2859296 | 1759570 | 1759070 | 1965585 | 1965085 | 2441269 | 2440769 | 556450  | 556950 |        |
| 2567 BPSL2416                      | 44 | 584712            | 585575 | 461559 | 462422 | 463555 | 464418 | 579734 | 580597 | 621100 | 621963 | 2857696 | 2858559 | 1760670 | 1759807 | 1966685 | 1965822 | 2442369 | 2441506 | 555350  | 556213 |        |
| 2568 BPSL2417                      | 44 | 584585            | 583680 | 461432 | 460527 | 463428 | 462523 | 579607 | 578702 | 620973 | 620068 | 2857569 | 2856664 | 1760797 | 1761702 | 1966812 | 1967717 | 2442496 | 2443401 | 555223  | 554318 |        |
| 2569 BPSL2418                      | 44 | 583510            | 583001 | 460357 | 459848 | 462353 | 461844 | 578532 | 578023 | 619898 | 619389 | 2856494 | 2855985 | 1761872 | 1762381 | 1967887 | 1968396 | 2443571 | 2444080 | 554148  | 553639 |        |
| 2570 BPSL2419                      | 44 | 580694            | 581284 | 457541 | 458131 | 459537 | 460127 | 575716 | 576306 | 617082 | 617672 | 2853678 | 2854268 | 1764553 | 1763963 | 1970703 | 1970113 | 2446252 | 2445662 | 551467  | 552057 |        |
| 2571 BPSL2420                      | 44 | 578317            | 580563 | 455164 | 457410 | 457160 | 459406 | 573339 | 575585 | 614705 | 616951 | 2851301 | 2853547 | 1766930 | 1764684 | 1973080 | 1970834 | 2448629 | 2446383 | 549090  | 551336 |        |
| 2572 BPSL2421                      | 44 | 578099            | 576882 | 454946 | 453729 | 456942 | 455725 | 573121 | 571904 | 614487 | 613270 | 2851083 | 2849866 | 1767148 | 1768365 | 1973298 | 1974515 | 2448847 | 2450064 | 548872  | 547655 |        |
| 2573 BPSL2422                      | 44 | 576689            | 576135 | 453536 | 452982 | 455532 | 454978 | 571711 | 571157 | 613077 | 612523 | 2849673 | 2849119 | 1768558 | 1769112 | 1974708 | 1975262 | 2450257 | 2450811 | 547462  | 546908 |        |
| 2574 BPSL2423                      | 44 | 575861            | 574467 | 452708 | 451314 | 454704 | 453310 | 570883 | 569489 | 612249 | 610855 | 2848845 | 2847451 | 1769386 | 1770780 | 1975536 | 1976930 | 2451085 | 2452479 | 546634  | 545240 |        |
| 2575 BPSL2424                      | 44 | 573322            | 574347 | 450169 | 451194 | 452165 | 453190 | 568344 | 569369 | 609710 | 610735 | 2846306 | 2847331 | 1771925 | 1770900 | 1978075 | 1977056 | 2453624 | 2452599 | 544095  | 545120 |        |
| 2576 BPSL2425                      | 44 | 572863            | 573291 | 449710 | 450138 | 451706 | 452134 | 567885 | 568313 | 609251 | 609679 | 2845847 | 2846275 | 1772384 | 1771956 | 1978534 | 1978106 | 2454083 | 2453655 | 543636  | 544064 |        |
| 2577 BPSL2426                      | 44 | 572084            | 572854 | 448931 | 449701 | 450927 | 451697 | 567106 | 567876 | 608472 | 609242 | 2845068 | 2845838 | 1773163 | 1772393 | 1979313 | 1978543 | 2454862 | 2454092 | 542857  | 543627 |        |
| 2578 BPSL2427                      | 44 | 571260            | 572084 | 448107 | 448931 | 450103 | 450927 | 566282 | 567106 | 607648 | 608472 | 2844244 | 2845068 | 1773987 | 1773163 | 1980137 | 1979313 | 2455686 | 2454862 | 542033  | 542857 |        |
| 2579 BPSL2428                      | 44 | 570341            | 571237 | 447188 | 448084 | 449184 | 450080 | 565363 | 566259 | 606729 | 607625 | 2843325 | 2844221 | 1774906 | 1774010 | 1981056 | 1980160 | 2456605 | 2455709 | 541114  | 542010 |        |
| 2580 BPSL2429                      | 44 | 568868            | 570268 | 445715 | 447115 | 447711 | 449111 | 563890 | 565290 | 605256 | 606656 | 2841852 | 2843252 | 1776379 | 1774979 | 1982529 | 1981129 | 2458078 | 2456678 | 539641  | 541041 |        |
| 2581 BPSL2430                      | 44 | 567824            | 568714 | 444671 | 445561 | 446667 | 447557 | 562846 | 563736 | 604212 | 605102 | 2840808 | 2841698 | 1777423 | 1776533 | 1983573 | 1982683 | 2459122 | 2458232 | 538597  | 539487 |        |
| 2582 BPSL2431                      | 44 | 566015            | 567805 | 442862 | 444652 | 444858 | 446648 | 561037 | 562827 | 602403 | 604193 | 2838999 | 2840789 | 1779232 | 1777442 | 1985382 | 1983592 | 2460931 | 2459141 | 536788  | 538578 |        |
| 2583 BPSL2432                      | 44 | 565520            | 565771 | 442367 | 442618 | 444363 | 444614 | 560542 | 560793 | 601908 | 602159 | 2838504 | 2838755 | 1779727 | 1779476 | 1985877 | 1985626 | 2461426 | 2461175 | 536293  | 536544 |        |
| 2584 BPSL2433                      | 44 | 564066            | 565520 | 440913 | 442367 | 442909 | 444363 | 559088 | 560542 | 600454 | 601908 | 2837050 | 2838504 | 1781181 | 1779727 | 1987331 | 1985877 | 2462880 | 2461426 | 534839  | 536293 |        |
| 2585 BPSL2434                      | 44 | 562946            | 563995 | 439793 | 440842 | 441789 | 442838 | 557968 | 559017 | 599334 | 600383 | 2835930 | 2836979 | 1782301 | 1781252 | 1988451 | 1987402 | 2464000 | 2462951 | 533719  | 534768 |        |
| 2586 BPSL2435                      | 44 | 562338            | 562937 | 439185 |        |        |        |        |        |        |        |         |         |         |         |         |         |         |         |         |        |        |



|      |                               |    |        |        |        |        |        |        |        |        |        |        |         |         |         |         |         |         |         |         |        |        |
|------|-------------------------------|----|--------|--------|--------|--------|--------|--------|--------|--------|--------|--------|---------|---------|---------|---------|---------|---------|---------|---------|--------|--------|
| 2588 | BPSL2437                      | 44 | 561076 | 561546 | 437923 | 438393 | 439919 | 440389 | 556098 | 556568 | 597464 | 597934 | 2834060 | 2834530 | 1784171 | 1783701 | 1990321 | 1989851 | 2465870 | 2465400 | 531849 | 532319 |
| 2589 | BPSL2438                      | 44 | 559826 | 561061 | 436673 | 437908 | 438669 | 439904 | 554848 | 556083 | 596214 | 597449 | 2832810 | 2834045 | 1785421 | 1784186 | 1991571 | 1990336 | 2467120 | 2465885 | 530599 | 531834 |
| 2590 | BPSL2439                      | 44 | 559430 | 559666 | 436277 | 436513 | 438273 | 438509 | 554452 | 554688 | 595818 | 596054 | 2832414 | 2832650 | 1785817 | 1785581 | 1991967 | 1991731 | 2467516 | 2467280 | 530203 | 530439 |
| 2591 | BPSL2440                      | 44 | 558537 | 559283 | 435384 | 436130 | 437380 | 438126 | 553559 | 554305 | 594925 | 595671 | 2831521 | 2832267 | 1786710 | 1785964 | 1992860 | 1992114 | 2468409 | 2467663 | 529310 | 530056 |
| 2592 | BPSL2441                      | 44 | 557554 | 558483 | 434401 | 435330 | 436397 | 437326 | 552576 | 553505 | 593942 | 594871 | 2830538 | 2831467 | 1787693 | 1786764 | 1993843 | 1992914 | 2469392 | 2468463 | 528327 | 529256 |
| 2593 | BPSL2442                      | 44 | 556494 | 557480 | 433341 | 434327 | 435337 | 436323 | 551516 | 552502 | 592882 | 593868 | 2829478 | 2830464 | 1788753 | 1787767 | 1994903 | 1993917 | 2470452 | 2469466 | 527267 | 528253 |
| 2594 | BPSL2443                      | 44 | 555388 | 556491 | 432235 | 433338 | 434231 | 435334 | 550410 | 551513 | 591776 | 592879 | 2828372 | 2829475 | 1789859 | 1788756 | 1996009 | 1994906 | 2471558 | 2470455 | 526161 | 527264 |
| 2595 | BPSL2444                      | 44 | 555070 | 555246 | 431917 | 432093 | 433913 | 434089 | 550092 | 550268 | 591458 | 591634 | 2828054 | 2828230 | 1790177 | 1790001 | 1996327 | 1996151 | 2471876 | 2471700 | 525843 | 526019 |
| 2596 | BPSL2445                      | 44 | 554341 | 554970 | 431188 | 431817 | 433184 | 433813 | 549363 | 549992 | 590729 | 591358 | 2827325 | 2827954 | 1790906 | 1790277 | 1997056 | 1996427 | 2472605 | 2471976 | 525114 | 525743 |
| 2597 | BPSL2446                      | 44 | 554097 | 553453 | 430944 | 430300 | 432940 | 432296 | 549119 | 548475 | 590485 | 589841 | 2827081 | 2826437 | 1791150 | 1791794 | 1997300 | 1997944 | 2472849 | 2473493 | 524870 | 524226 |
| 2598 | BPSL2447                      | 44 | 553453 | 552734 | 430300 | 429581 | 432296 | 431577 | 548475 | 547756 | 589841 | 589122 | 2826437 | 2825718 | 1791794 | 1792513 | 1997944 | 1998663 | 2473493 | 2474212 | 524226 | 523507 |
| 2599 | BPSL2448                      | 44 | 551691 | 552689 | 428538 | 429536 | 430534 | 431532 | 546713 | 547711 | 588079 | 589077 | 2824675 | 2825673 | 1793556 | 1792558 | 1999706 | 1998708 | 2475255 | 2474257 | 522464 | 523462 |
| 2600 | BPSL2449                      | 44 | 551286 | 551678 | 428133 | 428525 | 430129 | 430521 | 546308 | 546700 | 587674 | 588066 | 2824270 | 2824662 | 1793961 | 1793569 | 2000111 | 1999719 | 2475660 | 2475268 | 522059 | 522451 |
| 2601 | BPSL2450                      | 44 | 551035 | 551286 | 427882 | 428133 | 429878 | 430129 | 546057 | 546308 | 587423 | 587674 | 2824019 | 2824270 | 1794212 | 1793961 | 2000362 | 2000111 | 2475911 | 2475660 | 521808 | 522059 |
| 2602 | BPSL2451                      | 44 | 549981 | 550985 | 426828 | 427832 | 428824 | 429828 | 545003 | 546007 | 586369 | 587373 | 2822965 | 2823969 | 1795266 | 1794262 | 2001416 | 2000412 | 2476965 | 2475961 | 520754 | 521758 |
| 2603 | BPSL2452                      | 44 | 549217 | 545948 | 426064 | 424205 | 428060 | 426309 |        |        | 585605 | 582336 | 2822201 | 2818941 | 1796030 | 1799290 | 2002180 | 2005440 | 2477729 | 2480998 | 519990 | 516721 |
| 2604 | BPSL2453                      | 44 | 545775 | 544696 | 422220 | 421141 | 423678 | 422599 | 540809 | 539997 | 582163 | 581084 | 2818768 | 2817689 | 1799463 | 1800542 | 2005613 | 2006692 | 2481171 | 2482250 | 516548 | 515469 |
| 2605 | BPSL2454                      | 44 | 544677 | 544039 | 421122 | 420484 | 422580 | 421942 | 539978 | 539766 | 581065 | 580427 | 2817670 | 2817032 | 1800561 | 1801199 | 2006711 | 2007349 | 2482269 | 2482907 | 515450 | 515220 |
| 2606 | BPSL2455                      | 44 | 543924 | 542617 | 420369 | 419062 | 421827 | 420520 | 539328 | 538828 | 580312 | 579005 | 2816917 | 2815622 | 1801314 | 1802609 | 2007464 | 2008771 | 2483022 | 2484329 | 514134 | 512827 |
| 2607 | BPSL2456                      | 44 | 542577 | 542293 | 419022 | 418738 | 420480 | 420196 |        |        | 578965 | 578681 | 2815582 | 2815298 | 1802649 | 1802933 | 2008811 | 2009095 | 2484369 | 2484653 | 512787 | 512503 |
| 2608 | BPSL2457                      | 44 | 542293 | 541793 | 418738 | 418238 | 420196 | 419696 |        |        | 578681 | 578181 | 2815298 | 2814798 | 1802933 | 1803433 | 2009095 | 2009595 | 2484653 | 2485153 | 512503 | 512003 |
| 2609 | BPSL2458                      | 44 | 540072 | 541544 | 416517 | 417989 | 417975 | 419447 | 538216 | 538788 | 576460 | 577932 | 2813077 | 2814549 | 1805154 | 1803682 | 2011316 | 2009844 | 2486874 | 2485402 | 510282 | 511754 |
| 2610 | BPSL2459                      | 44 | 539086 | 540072 | 415531 | 416517 | 416989 | 417975 | 537230 | 538216 | 575474 | 576460 | 2812091 | 2813077 | 1806140 | 1805154 | 2012302 | 2011316 | 2487860 | 2486874 | 509296 | 510282 |
| 2611 | BPSL2460                      | 44 | 537578 | 539017 | 414023 | 415462 | 415481 | 416920 | 535722 | 537161 | 573966 | 575405 | 2810583 | 2812022 | 1807648 | 1806209 | 2013810 | 2012371 | 2489368 | 2487929 | 507788 | 509227 |
| 2612 | BPSL2461                      | 44 | 536800 | 537519 | 413245 | 413964 | 414703 | 415422 | 534944 | 535663 | 573188 | 573907 | 2809805 | 2810524 | 1808426 | 1807707 | 2014588 | 2013869 | 2490146 | 2489427 | 507010 | 507729 |
| 2613 | BPSL2462                      | 44 | 535516 | 536712 | 411961 | 413157 | 413419 | 414615 | 533660 | 534856 | 571904 | 573100 | 2808521 | 2809717 | 1809710 | 1808514 | 2015872 | 2014676 | 2491340 | 2490234 | 505726 | 506922 |
| 2614 | BPSL2463                      | 44 | 535247 | 534927 | 411692 | 411372 | 413150 | 413091 | 533391 | 533164 | 571635 | 571315 | 2808252 | 2807932 | 1809979 | 1810299 | 2016141 | 2016353 | 2491699 | 2492019 | 505457 | 505137 |
| 2615 | BPSL2464                      | 44 | 534436 | 533960 | 410971 | 410495 | 412504 | 412028 | 532781 | 532305 | 571277 | 570963 | 2807441 | 2806965 | 1810790 | 1811266 | 2016708 | 2017184 | 2492510 | 2492986 | 504646 | 504170 |
| 2616 | BPSL2465                      | 44 | 533473 | 532574 | 410008 | 409109 | 411541 | 410642 | 531818 | 530919 | 570490 | 569591 | 2806506 | 2805607 | 1811725 | 1812624 | 2017657 | 2018556 | 2493466 | 2494365 | 503676 | 502777 |
| 2617 | BPSL2466                      | 44 | 531862 | 532383 | 408493 | 408918 | 409930 | 410451 | 530207 | 530728 | 568879 | 569400 | 2804895 | 2805416 | 1813336 | 1812815 | 2019268 | 2018747 | 2495077 | 2494556 | 502065 | 502586 |
| 2618 | BPSL2467                      | 44 | 531542 | 531324 | 407862 | 407644 | 409610 | 409392 | 529887 | 529669 | 568559 | 568341 | 2804575 | 2804357 | 1813656 | 1813874 | 2019588 | 2019806 | 2495397 | 2495615 | 501745 | 501527 |
| 2619 | BPSL2468                      | 44 | 531196 | 529793 | 407516 | 406113 | 409264 | 407861 | 529541 | 528138 | 568213 | 566810 | 2804229 | 2802826 | 1814002 | 1815405 | 2019934 | 2021337 | 2495743 | 2497146 | 501399 | 499996 |
| 2620 | Chr1_115a_IS407A_A            |    | 528284 | 529519 | 404604 | 405839 | 406352 | 407587 | 526629 | 527864 | 565315 | 566550 | 2801289 | 2802524 | 1815700 | 1816935 | 2021618 | 2022853 | 2497406 | 2498641 | 498494 | 499729 |
| 2621 | Chr1_115b_IS407A_A            |    |        |        |        |        |        |        |        |        |        |        | 907313  | 908548  | 252371  | 253606  | 387955  | 389190  |         |         |        |        |
| 2622 | Chr1_116_IS407A_B             |    | 525748 | 526983 | 402068 | 403303 | 403816 | 405051 | 524093 | 525328 |        |        |         |         |         |         |         |         |         |         |        |        |
| 2623 | BPSL2469                      | 45 | 525411 | 524020 | 401731 | 400340 | 403479 | 402088 | 523756 | 522365 | 564978 | 563587 | 908885  | 910276  | 252034  | 250643  | 389527  | 390918  | 2498978 | 2500369 | 498157 | 496766 |
| 2624 | BPSL2470                      | 45 | 523032 | 523535 | 399352 | 399855 | 401100 | 401603 | 521377 | 521880 | 562599 | 563102 | 911264  | 910761  | 249655  | 250158  | 391906  | 391403  | 2501357 | 2500854 | 495778 | 496281 |
| 2625 | BPSL2471                      | 45 | 522079 | 521372 | 398399 | 397692 | 400147 | 399440 | 520424 | 519717 | 561646 | 560939 | 912202  | 912909  | 248709  | 248002  | 392845  | 393552  | 2502303 | 2503010 | 494839 | 494132 |
| 2626 | BPSL2472                      | 45 | 521213 | 518643 | 397533 | 394963 | 399281 | 397494 | 519558 | 516988 | 560780 | 558210 | 913068  | 915638  | 247843  | 245273  | 393711  | 396281  | 2503169 | 2505694 | 493973 | 491448 |
| 2627 | Chr1_117a_ISBma2_A            |    | 517013 | 518585 | 393333 | 394905 | 394492 | 396064 | 515358 | 516930 | 556580 | 558152 | 915696  | 917293  | 243623  | 245215  | 396339  | 397912  | 2505752 | 2507325 | 489817 | 491390 |
| 2628 | Chr1_117b_ISBma2_A            |    | 403674 | 405246 | 279549 | 281121 | 280544 | 282116 | 401987 | 403559 | 440655 | 442227 |         |         |         |         | 280947  | 282519  |         |         |        |        |
| 2629 | BPSL2473                      | 46 | 406273 | 405305 | 282148 | 281180 | 283143 | 282175 | 404586 | 403618 | 443254 | 442286 | 918322  | 917354  | 242594  | 243562  | 283548  | 282580  | 2508352 | 2507384 | 488790 | 489758 |
| 2630 | BPSL2474                      | 46 | 407715 | 406333 | 283590 | 282208 | 284585 | 283203 | 406028 | 404646 | 444696 | 443314 | 919764  | 918382  | 241152  | 242534  | 284990  | 283608  | 2509794 | 2508412 | 487348 | 488730 |
| 2631 | BPSL2474a                     | 46 | 408513 | 409877 | 284388 | 285752 | 285383 | 285943 | 406826 | 407554 | 445494 | 446858 | 920562  | 921926  | 240354  | 238990  | 285788  | 287152  | 2510592 | 2511956 | 396874 | 397539 |
| 2632 | BPSL2475                      | 46 | 410475 | 411932 | 286350 | 287807 | 287954 | 289411 | 408789 | 410246 | 447456 | 448913 | 922542  | 923999  | 238383  | 236926  | 287777  | 289234  | 2512599 | 2514056 | 398173 | 399630 |
| 2633 | BPSL2476                      | 46 | 412143 | 412643 | 288018 | 288518 | 289622 | 290122 | 410457 | 410957 | 449124 | 449624 | 924210  | 924710  | 236715  | 236215  | 289445  | 288945  | 2514267 | 2514767 | 399841 | 400341 |
| 2634 | BPSL2477 IS Chr1_118_ISBma2_A | 46 | 414238 | 412778 | 290113 | 288653 | 291717 | 290257 | 412552 | 411092 | 451219 | 449759 | 926305  | 924845  | 234620  | 236080  | 291540  | 290080  | 2516362 | 2514902 | 400418 | 401990 |
| 2635 | BPSL2478                      | 46 | 415745 | 414378 | 291620 | 290253 | 293224 | 291857 | 414059 | 412692 | 452726 | 451359 | 927812  | 926445  | 233113  | 234480  | 293047  | 291680  | 2517869 | 2516502 | 403443 | 402076 |
| 2636 | BPSL2479                      | 46 | 415891 | 416496 | 291766 | 292371 | 293370 | 293975 | 414205 | 414810 | 452872 | 453477 | 927958  | 928563  | 232967  | 232362  | 293193  | 293798  | 2518    |         |        |        |



|      |                   |    |        |          |        |        |        |        |        |        |        |        |        |        |        |        |        |        |         |         |        |        |
|------|-------------------|----|--------|----------|--------|--------|--------|--------|--------|--------|--------|--------|--------|--------|--------|--------|--------|--------|---------|---------|--------|--------|
| 2639 | BPSL2482          | 46 | 418072 | 419334   | 293947 | 295209 | 295551 | 296813 | 416386 | 417648 | 455053 | 456315 | 930139 | 931401 | 230786 | 229524 | 295374 | 296636 | 2520196 | 2521458 | 405770 | 407032 |
| 2640 | BPSL2483          | 46 | 419334 | 420275   | 295209 | 296150 | 296813 | 297754 | 417648 | 418589 | 456315 | 457256 | 931401 | 932342 | 229524 | 228583 | 296636 | 297577 | 2521458 | 2522399 | 407032 | 407973 |
| 2641 | BPSL2484          | 46 | 420347 | 420661   | 296222 | 296536 | 297826 | 298140 | 418661 | 418975 | 457328 | 457642 | 932414 | 932728 | 228511 | 228197 | 297649 | 297963 | 2522471 | 2522785 | 408045 | 408359 |
| 2642 | BPSL2485          | 46 | 421820 | 420834   | 297695 | 296709 | 299299 | 298313 | 420134 | 419148 | 458801 | 457815 | 933887 | 932901 | 227038 | 228024 | 299122 | 298136 | 2523944 | 2522958 | 409518 | 408532 |
| 2643 | BPSL2486          | 46 | 422553 | 421873   | 298428 | 297748 | 300032 | 299352 | 420867 | 420187 | 459534 | 458854 | 934620 | 933940 | 226305 | 226985 | 299855 | 299175 | 2524677 | 2523997 | 410251 | 409571 |
| 2644 | BPSL2487          | 46 | 423465 | 424052   | 299340 | 299927 | 300944 | 301531 | 421779 | 422366 | 460476 | 461063 | 935550 | 936137 | 225381 | 224794 | 300785 | 301372 | 2525601 | 2526188 | 411175 | 411762 |
| 2645 | BPSL2488_ISBma1   | 46 |        |          |        |        |        |        |        |        |        |        |        |        |        |        |        |        |         |         |        |        |
| 2646 | BPSL2489          | 46 | 424765 | 424379   | 300640 | 300254 | 302244 | 301858 | 423079 | 422693 | 461776 | 461390 | 936850 | 936464 | 224081 | 224467 | 302085 | 301699 | 2526901 | 2526515 | 412475 | 412089 |
| 2647 | BPSL2490          | 46 | 425697 | 424906   | 301572 | 300781 | 303176 | 302385 | 424011 | 423220 | 462708 | 461917 | 937782 | 936991 | 223149 | 223940 | 303017 | 302226 | 2527833 | 2527042 | 413407 | 412616 |
| 2648 | BPSL2491          | 46 | 426334 | 425702   | 302209 | 301577 | 303813 | 303181 | 424648 | 424016 | 463345 | 462713 | 938419 | 937787 | 222512 | 223144 | 303654 | 303022 | 2528470 | 2527838 | 414044 | 413412 |
| 2649 | BPSL2492          | 46 | 426687 | 426436   | 302562 | 302311 | 304166 | 303915 | 425001 | 424750 | 463698 | 463447 | 938772 | 938521 | 222159 | 222410 | 304007 | 303756 | 2528823 | 2528572 | 414397 | 414146 |
| 2650 | BPSL2493          | 46 | 426903 | 428018   | 302778 | 303893 | 304382 | 305497 | 425217 | 426332 | 463914 | 465029 | 938988 | 940103 | 221943 | 220828 | 304223 | 305338 | 2529039 | 2530154 | 414613 | 415728 |
| 2651 | BPSL2494          | 46 | 428128 | 428592   | 304003 | 304467 | 305607 | 306071 | 426442 | 426906 | 465139 | 465603 | 940213 | 940677 | 220718 | 220254 | 305448 | 305912 | 2530264 | 2530728 | 415838 | 416302 |
| 2652 | BPSL2495          | 46 | 429787 | 428633   | 305662 | 304508 | 307266 | 306112 | 428101 | 426947 | 466798 | 465644 | 941872 | 940718 | 219059 | 220213 | 307107 | 305953 | 2531923 | 2530769 | 417497 | 416343 |
| 2653 | BPSL2496          | 46 | 430384 | 429899   | 306259 | 305774 | 307863 | 307378 | 428698 | 428213 | 467395 | 466910 | 942469 | 941984 | 218462 | 218947 | 307704 | 307219 | 2532520 | 2532035 | 418094 | 417609 |
| 2654 | Chr1_119_IS407A_C | 46 |        |          |        |        |        |        |        |        |        |        | 942572 | 943807 |        |        |        |        |         |         |        |        |
| 2655 | BPSL2497          | 46 | 430532 | 431815   | 306407 | 307690 | 308011 | 309294 | 428846 | 430129 | 467543 | 468826 | 943857 | 945140 | 218314 | 217031 | 307852 | 309135 | 2532668 | 2533951 | 418242 | 419525 |
| 2656 | BPSL2498          | 46 | 432652 | 431936   | 309596 | 308514 | 311200 | 310118 | 432035 | 430953 | 470732 | 469650 | 947046 | 945964 | 215125 | 216207 | 311041 | 309959 | 2535857 | 2534775 | 421431 | 420349 |
| 2657 | BPSL2499          | 46 | 434769 | 433837   | 310644 | 309712 | 312248 | 311316 | 433083 | 432151 | 471780 | 470848 | 948094 | 947162 | 214077 | 215009 | 312089 | 311157 | 2536905 | 2535973 | 422479 | 421547 |
| 2658 | BPSL2500          | 46 | 435534 | 434788   | 311409 | 310663 | 313013 | 312267 | 433848 | 433102 | 472545 | 471799 | 948859 | 948113 | 213312 | 214058 | 312854 | 312108 | 2537670 | 2536924 | 423244 | 422498 |
| 2659 | BPSL2501          | 46 | 436555 | 435764   | 312430 | 311639 | 314034 | 313243 | 434869 | 434078 | 473566 | 472775 | 949880 | 949089 | 212291 | 213082 | 313875 | 313084 | 2538691 | 2537900 | 424265 | 423474 |
| 2660 | BPSL2502          | 46 | 437282 | 436632   | 313157 | 312507 | 314761 | 314111 | 435596 | 434946 | 474293 | 473643 | 950607 | 949957 | 211564 | 212214 | 314602 | 313952 | 2539418 | 2538768 | 424992 | 424342 |
| 2661 | BPSL2503          | 46 | 438306 | 437275   | 314181 | 313150 | 315785 | 314754 | 436620 | 435589 | 475317 | 474286 | 951631 | 950600 | 210540 | 211571 | 315626 | 314595 | 2540442 | 2539411 | 426016 | 424985 |
| 2662 | BPSL2504          | 46 | 438615 | 439454   | 314490 | 315329 | 316094 | 316933 | 436929 | 437768 | 475626 | 476465 | 951940 | 952779 | 210231 | 209392 | 315935 | 316774 | 2540751 | 2541590 | 426325 | 427164 |
| 2663 | BPSL2505          | 46 | 440723 | 439803   | 316598 | 315678 | 318202 | 317282 | 439037 | 438117 | 477734 | 476814 | 954048 | 953128 | 208123 | 209043 | 318043 | 317123 | 2542859 | 2541939 | 428433 | 427513 |
| 2664 | BPSL2506          | 46 | 440851 | 442194   | 316726 | 318069 | 318330 | 319673 | 439165 | 440508 | 477862 | 479205 | 954176 | 955519 | 207995 | 206646 | 318171 | 319514 | 2542987 | 2544330 | 428561 | 429904 |
| 2665 | BPSL2507          | 46 | 443325 | 442426   | 319200 | 318301 | 320804 | 319905 | 441639 | 440740 | 480336 | 479437 | 956650 | 955751 | 205515 | 206414 | 320645 | 319746 | 2545461 | 2544562 | 431035 | 430136 |
| 2666 | BPSL2508          | 46 | 443966 | 443652   | 319841 | 319527 | 321445 | 321131 | 442280 | 441966 | 480977 | 480663 | 957291 | 956977 | 204874 | 205188 | 321286 | 320972 | 2546102 | 2545788 | 431676 | 431362 |
| 2667 | BPSL2509          | 46 | 445030 | 444041   | 320905 | 319916 | 322509 | 321520 | 443344 | 442355 | 482041 | 481052 | 958355 | 957366 | 203810 | 204799 | 322350 | 321361 | 2547166 | 2546177 | 432740 | 431751 |
| 2668 | BPSL2510          | 46 | 446012 | 445092   | 321887 | 320967 | 323491 | 322571 | 444326 | 443406 | 483023 | 482103 | 959337 | 958417 | 202828 | 203748 | 323332 | 322412 | 2548148 | 2547228 | 433722 | 432802 |
| 2669 | BPSL2511          | 46 | 447444 | 446047   | 323319 | 321922 | 324923 | 323526 | 445758 | 444361 | 484455 | 483058 | 960769 | 959372 | 201396 | 202793 | 324764 | 323367 | 2549580 | 2548123 | 435154 | 433757 |
| 2670 | BPSL2512          | 46 | 448734 | 447568   | 324609 | 323443 | 326213 | 325047 | 447048 | 445882 | 485745 | 484579 | 962059 | 960893 | 200106 | 201272 | 326054 | 324888 | 2550870 | 2549704 | 436444 | 435278 |
| 2671 | BPSL2513          | 46 | 449260 | 448790   | 325135 | 324665 | 326739 | 326269 | 447574 | 447104 | 486271 | 485801 | 962585 | 962115 | 199580 | 200050 | 326580 | 326110 | 2551396 | 2550926 | 436970 | 436500 |
| 2672 | Chr1_120_ISBma2_A | 46 | 449261 | 450833   | 325136 | 326708 | 326740 | 328312 | 447575 | 449147 | 486272 | 487844 | 962586 | 964158 | 198007 | 199579 | 326581 | 328153 | 2551397 | 2552969 | 436971 | 438543 |
| 2673 | BPSL2514          | 46 | 451221 | 450901   | 327096 | 326776 | 328700 | 328380 | 449535 | 449215 | 488232 | 487912 | 964546 | 964226 | 197619 | 197939 | 328541 | 328221 | 2553357 | 2553037 | 438931 | 438611 |
| 2674 | BPSL2515          | 46 | 452956 | 451247   | 328831 | 327122 | 330435 | 328726 | 451270 | 449561 | 489967 | 488258 | 966281 | 964572 | 195884 | 197593 | 330276 | 328567 | 2555092 | 2553383 | 440666 | 438957 |
| 2675 | BPSL2516          | 46 | 453811 | 453104   | 329686 | 328979 | 331290 | 330583 | 452125 | 451418 | 490822 | 490115 | 967136 | 966429 | 195029 | 195736 | 331131 | 330424 | 2555947 | 2555240 | 441521 | 440814 |
| 2676 | BPSL2517          | 46 | 456069 | 453811   | 331944 | 329686 | 333548 | 331290 | 454383 | 452125 | 493080 | 490822 | 969394 | 967136 | 192771 | 195029 | 333389 | 331131 | 2558205 | 2555947 | 443779 | 441521 |
| 2677 | BPSL2518          | 46 | 457316 | 456237   | 333191 | 332112 | 334795 | 333716 | 455630 | 454551 | 494327 | 493248 | 970641 | 969562 | 191524 | 192603 | 334636 | 333557 | 2559452 | 2558373 | 445026 | 443947 |
| 2678 | BPSL2519          | 46 | 458433 | 457354   | 334308 | 333229 | 335912 | 334833 | 456747 | 455668 | 495444 | 494365 | 971758 | 970679 | 190407 | 191486 | 335753 | 334674 | 2560569 | 2559490 | 446143 | 445064 |
| 2679 | BPSL2520          | 46 | 459203 | 458610   | 335078 | 334485 | 336682 | 336089 | 457517 | 456924 | 496214 | 495621 | 972528 | 971935 | 189637 | 190230 | 336523 | 335930 | 2561339 | 2560746 | 446913 | 446320 |
| 2680 | BPSL2521          | 46 | 461902 | 459305   | 337777 | 335180 | 339381 | 336784 | 460216 | 457619 | 498913 | 496316 | 975227 | 972630 | 186938 | 189535 | 339222 | 336625 | 2564038 | 2561441 | 449612 | 447015 |
| 2681 | BPSL2522          | 46 | 462413 | 463084   | 338288 | 338959 | 339892 | 340563 | 460727 | 461398 | 499424 | 500095 | 975738 | 976409 | 186427 | 185756 | 339733 | 340404 | 2564549 | 2565220 | 450123 | 450794 |
| 2682 | BPSL2523          | 46 | 463256 | 463951   | 339131 | 339826 | 340735 | 341430 | 461570 | 462265 | 500267 | 500962 | 976581 | 977276 | 185584 | 184889 | 340576 | 341271 | 2565392 | 2566087 | 450966 | 451661 |
| 2683 | BPSL2524          | 46 | 463980 | 464702   | 339855 | 340577 | 341459 | 342181 | 462294 | 463016 | 500991 | 501713 | 977305 | 978027 | 184860 | 184138 | 341300 | 342022 | 2566116 | 2566838 | 451690 | 452412 |
| 2684 | Chr1_121_ISBma2_A | 46 | 465119 | 465259   | 340994 | 341134 | 342598 | 342738 | 463433 | 463573 | 502130 | 502270 | 978444 | 978584 | 183581 | 183721 | 342439 | 342579 | 2567255 | 2567395 | 452829 | 452969 |
| 2685 | Chr1_122_IS407A_A | 46 | 465256 | 466491   | 341131 | 342366 | 342735 | 343970 | 463570 | 464805 | 502267 | 503502 | 978581 | 979816 | 182349 | 183584 | 342576 | 343811 | 2567392 | 2568627 | 452966 | 454201 |
| 2686 | Chr1_123_ISBma2_C | 46 |        |          |        |        |        |        |        |        |        |        |        |        |        |        |        |        |         |         | 454308 | 455880 |
| 2687 | Chr1_124_ISBma1_B | 46 | 466488 | 467560   | 342363 | 343435 | 343967 | 345039 | 464802 | 465874 | 503499 | 504571 |        |        |        |        |        |        | 2568741 | 2570045 | 455910 | 457214 |
| 2688 | BPSL2525          | 46 | 467798 | 468481   | 343673 | 344356 | 345277 | 345960 | 466112 | 466795 | 504809 | 505492 | 980159 | 980842 | 182006 | 181323 | 344154 | 344837 | 2570283 | 2570966 | 457452 | 458135 |
| 2689 | BPSL2526          | 46 | 468928 | 468668</ |        |        |        |        |        |        |        |        |        |        |        |        |        |        |         |         |        |        |





|               |    |                   |         |         |         |         |         |         |         |         |         |         |         |         |         |         |         |        |        |         |         |
|---------------|----|-------------------|---------|---------|---------|---------|---------|---------|---------|---------|---------|---------|---------|---------|---------|---------|---------|--------|--------|---------|---------|
| 2792 BPSL2625 | 47 | 2233006           | 2233617 | 2125765 | 2126376 | 2141225 | 2141836 | 2221075 | 2221686 | 2381367 | 2381978 | 2639848 | 2639237 | 1982146 | 1982757 | 2187795 | 2188406 | 776847 | 776236 | 2206190 | 2206801 |
| 2793 BPSL2626 | 47 | 2234083           | 2235216 | 2126842 | 2127975 | 2142302 | 2143435 | 2222152 | 2223285 | 2382444 | 2383577 | 2638771 | 2637638 | 1983223 | 1984356 | 2188872 | 2190005 | 775770 | 774637 | 2207267 | 2208400 |
| 2794 BPSL2627 | 47 | 2235299           | 2235817 | 2128058 | 2128576 | 2143518 | 2144036 | 2223368 | 2223886 | 2383666 | 2384178 | 2637555 | 2637037 | 1984439 | 1984957 | 2190088 | 2190606 | 774554 | 774037 | 2208483 | 2209001 |
| 2795 BPSL2628 | 47 | 2235817           | 2236251 | 2128576 | 2129010 | 2144036 | 2144470 | 2223886 | 2224320 | 2384178 | 2384612 | 2637037 | 2636603 | 1984957 | 1985391 | 2190606 | 2191040 | 774036 | 773602 | 2209001 | 2209435 |
| 2796 BPSL2629 | 47 | 2236262           | 2237509 | 2129021 | 2130268 | 2144481 | 2145728 | 2224331 | 2225578 | 2384623 | 2385870 | 2636592 | 2635345 | 1985402 | 1986649 | 2191051 | 2192298 | 773591 | 772344 | 2209446 | 2210693 |
| 2797 BPSL2630 | 47 | 2239236           | 2238172 | 2131995 | 2130931 | 2147455 | 2146391 | 2227305 | 2226241 | 2387501 | 2386437 | 2633588 | 2634652 | 1988370 | 1987306 | 2193995 | 2192931 | 770671 | 771735 | 2212414 | 2211350 |
| 2798 BPSL2631 | 47 | 2239861           | 2241417 | 2132620 | 2134176 | 2148080 | 2149636 | 2227930 | 2229486 | 2388126 | 2389682 | 2632963 | 2631407 | 1988995 | 1990551 | 2194620 | 2196176 | 770046 | 768490 | 2213039 | 2214595 |
| 2799 BPSL2632 | 47 | 2241461           | 2242132 | 2134220 | 2134891 | 2149680 | 2150351 | 2229530 | 2230201 | 2389726 | 2390397 | 2631363 | 2630692 | 1990595 | 1991266 | 2196220 | 2196891 | 768446 | 767775 | 2214639 | 2215310 |
| 2800 BPSL2633 | 47 | 2243572           | 2242592 | 2136331 | 2135351 | 2151791 | 2150811 | 2231641 | 2230661 | 2391837 | 2390857 | 2629252 | 2630232 | 1992706 | 1991726 | 2198331 | 2197351 | 766335 | 767315 | 2216750 | 2215770 |
| 2801 BPSL2634 | 47 | 2244027           | 2243737 | 2136786 | 2136496 | 2152246 | 2151956 | 2232096 | 2231806 | 2392922 | 2392002 | 2628797 | 2629087 | 1993161 | 1992871 | 2198786 | 2198496 | 765880 | 766170 | 2217205 | 2216915 |
| 2802 BPSL2635 | 47 | 2244453           | 2245586 | 2137212 | 2138345 | 2152672 | 2153805 | 2232522 | 2233655 | 2392718 | 2393851 | 2628371 | 2627238 | 1993587 | 1994720 | 2199212 | 2200345 | 765454 | 764321 | 2217631 | 2218764 |
| 2803 BPSL2636 | 47 | 2245672           | 2246232 | 2138431 | 2138991 | 2153891 | 2154451 | 2233741 | 2234301 | 2393938 | 2394498 | 2627152 | 2626592 | 1994806 | 1995366 | 2200431 | 2200991 | 764235 | 763675 | 2218850 | 2219410 |
| 2804 BPSL2637 | 47 | 2246615           | 2246262 | 2139374 | 2139021 | 2154834 | 2154481 | 2234684 | 2234331 | 2394881 | 2394528 | 2626209 | 2626562 | 1995749 | 1995396 | 2201374 | 2201021 | 763292 | 763645 | 2219793 | 2219440 |
| 2805 BPSL2638 | 47 | 2247025           | 2246642 | 2139784 | 2139401 | 2155244 | 2154861 | 2235094 | 2234711 | 2395291 | 2394908 | 2625799 | 2626182 | 1996159 | 1995776 | 2201784 | 2201401 | 762882 | 763265 | 2220203 | 2219820 |
| 2806 BPSL2639 | 47 | 2247635           | 2248852 | 2140394 | 2141611 | 2155854 | 2157071 | 2235704 | 2236921 | 2395901 | 2397118 | 2625189 | 2623972 | 1996769 | 1997986 | 2202394 | 2203611 | 762272 | 761055 | 2220813 | 2222030 |
| 2807          | 47 | Chr1_130_ISBma2_B |         |         |         |         |         |         |         |         |         | 2622284 | 2623857 | 1998101 | 1999674 | 2203726 | 2205299 |        |        |         |         |
| 2808 BPSL2640 | 47 | 2249851           | 2249126 | 2142610 | 2141885 | 2158070 | 2157345 | 2237920 | 2237195 | 2398117 | 2397392 | 2621376 | 2622101 | 2000582 | 1999857 | 2206207 | 2205482 | 760056 | 760781 | 2223029 | 2222304 |
| 2809 BPSL2641 | 47 | 2251333           | 2250089 | 2144092 | 2142848 | 2159552 | 2158308 | 2239402 | 2238158 | 2399599 | 2398355 | 2619894 | 2621138 | 2002064 | 2000820 | 2207689 | 2206445 | 758574 | 759818 | 2224511 | 2223267 |
| 2810 BPSL2642 | 47 | 2251728           | 2252519 | 2144487 | 2145278 | 2159947 | 2160738 | 2239797 | 2240588 | 2399994 | 2400785 | 2619499 | 2618708 | 2002459 | 2003250 | 2208084 | 2208875 | 758179 | 757388 | 2224906 | 2225697 |
| 2811 BPSL2643 | 47 | 2253512           | 2252685 | 2146271 | 2145444 | 2161731 | 2160904 | 2241581 | 2240754 | 2401778 | 2400951 | 2617715 | 2618542 | 2004243 | 2003416 | 2209868 | 2209041 | 756395 | 757222 | 2226690 | 2225863 |
| 2812 BPSL2644 | 47 | 2254170           | 2253592 | 2146929 | 2146351 | 2162389 | 2161811 | 2242239 | 2241661 | 2402436 | 2401858 | 2617057 | 2617635 | 2004901 | 2004323 | 2210526 | 2209948 | 755737 | 756315 | 2227348 | 2226770 |
| 2813 BPSL2645 | 47 | 2254478           | 2254170 | 2147237 | 2146929 | 2162697 | 2162389 | 2242547 | 2242239 | 2402744 | 2402436 | 2616749 | 2617057 | 2005209 | 2004901 | 2210834 | 2210526 | 755429 | 755737 | 2227656 | 2227348 |
| 2814 BPSL2646 | 47 | 2254666           | 2256057 | 2147425 | 2148816 | 2162885 | 2164276 | 2242735 | 2244126 | 2402932 | 2404323 | 2616561 | 2615170 | 2005397 | 2006788 | 2211022 | 2212413 | 755241 | 753850 | 2227844 | 2229235 |
| 2815 BPSL2647 | 47 | 2256094           | 2256396 | 2148853 | 2149155 | 2164313 | 2164615 | 2244163 | 2244465 | 2404360 | 2404662 | 2615133 | 2614831 | 2006825 | 2007127 | 2212450 | 2212752 | 753813 | 753511 | 2229272 | 2229574 |
| 2816 BPSL2648 | 47 | 2256506           | 2257156 | 2149265 | 2149915 | 2164725 | 2165375 | 2244575 | 2245225 | 2404772 | 2405422 | 2614721 | 2614071 | 2007237 | 2007887 | 2212862 | 2213512 | 753401 | 752751 | 2229684 | 2230334 |
| 2817 BPSL2649 | 47 | 2257174           | 2257494 | 2149933 | 2150253 | 2165393 | 2165713 | 2245243 | 2245563 | 2405440 | 2405760 | 2614053 | 2613733 | 2007905 | 2008225 | 2213530 | 2213850 | 752733 | 752413 | 2230352 | 2230672 |
| 2818 BPSL2650 | 47 | 2258909           | 2257584 | 2151668 | 2150343 | 2167128 | 2165803 | 2246978 | 2245653 | 2407184 | 2405859 | 2612309 | 2613634 | 2009649 | 2008324 | 2215274 | 2213949 | 750989 | 752314 | 2232096 | 2230771 |
| 2819 BPSL2651 | 47 | 2259264           | 2260568 | 2152023 | 2153327 | 2167483 | 2168787 | 2247333 | 2248637 | 2407539 | 2408843 | 2611954 | 2610650 | 2010004 | 2011308 | 2215629 | 2216933 | 750634 | 749330 | 2232451 | 2233755 |
| 2820 BPSL2652 | 47 | 2260666           | 2262285 | 2153425 | 2155044 | 2168885 | 2170504 | 2248735 | 2250354 | 2408941 | 2410560 | 2610552 | 2608933 | 2011406 | 2013025 | 2217031 | 2218650 | 749232 | 747613 | 2233853 | 2235472 |
| 2821 BPSL2653 | 47 | 2262290           | 2262391 | 2155049 | 2155150 | 2170509 | 2170610 | 2250359 | 2250460 | 2410565 | 2410666 | 2608928 | 2608827 | 2013030 | 2013131 | 2218655 | 2218756 | 747608 | 747507 | 2235477 | 2235578 |
| 2822          | 47 | Chr1_131_IS407A_C |         |         |         |         |         |         |         | 2411631 | 2412866 |         |         |         |         |         |         |        |        |         |         |
| 2823 BPSL2654 | 47 | 2263442           | 2264302 | 2156201 | 2157061 | 2171661 | 2172521 | 2251511 | 2252371 | 2412957 | 2413817 | 2607776 | 2606916 | 2014182 | 2015042 | 2219807 | 2220667 | 746456 | 745596 | 2236629 | 2237489 |
| 2824 BPSL2655 | 47 | 2264310           | 2264999 | 2157069 | 2157758 | 2172529 | 2173218 | 2252379 | 2253068 | 2413825 | 2414514 | 2606908 | 2606219 | 2015050 | 2015739 | 2220675 | 2221364 | 745588 | 744899 | 2237497 | 2238186 |
| 2825 BPSL2656 | 47 | 2265124           | 2266125 | 2157883 | 2158884 | 2173343 | 2174344 | 2253193 | 2254194 | 2414639 | 2415640 | 2606094 | 2605509 | 2015864 | 2016865 | 2221489 | 2222490 | 744774 | 743773 | 2238311 | 2239312 |
| 2826 BPSL2657 | 47 | 2266350           | 2266649 | 2159109 | 2159408 | 2174569 | 2174868 | 2254419 | 2254718 | 2415865 | 2416164 | 2604868 | 2604569 | 2017090 | 2017389 | 2222715 | 2223014 | 743548 | 743249 | 2239537 | 2239836 |
| 2827 BPSL2658 | 47 | 2266742           | 2267044 | 2159501 | 2159803 | 2174961 | 2175263 | 2254811 | 2255113 | 2416257 | 2416559 | 2604476 | 2604174 | 2017482 | 2017784 | 2223107 | 2223409 | 743156 | 742854 | 2239929 | 2240231 |
| 2828 BPSL2659 | 47 | 2267112           | 2268815 | 2159871 | 2161574 | 2175331 | 2177034 | 2255181 | 2256884 | 2416627 | 2418330 | 2604106 | 2602403 | 2017852 | 2019555 | 2223477 | 2225180 | 742786 | 741083 | 2240299 | 2242002 |
| 2829 BPSL2660 | 47 | 2268872           | 2269387 | 2161631 | 2162146 | 2177091 | 2177606 | 2256941 | 2257456 | 2418387 | 2418890 | 2602382 | 2601744 | 2019576 | 2020202 | 2225201 | 2225851 | 741062 | 740454 | 2242023 | 2242619 |
| 2830 BPSL2661 | 47 | 2269377           | 2270054 | 2162136 | 2162813 | 2177596 | 2178273 | 2257446 | 2258123 | 2418880 | 2419557 | 2601754 | 2601077 | 2020192 | 2020869 | 2225841 | 2226518 | 740464 | 739787 | 2242609 | 2243286 |
| 2831 BPSL2662 | 47 | 2270088           | 2270735 | 2162847 | 2163494 | 2178307 | 2178954 | 2258157 | 2258804 | 2419591 | 2420238 | 2601043 | 2600396 | 2020903 | 2021550 | 2226552 | 2227199 | 739753 | 739106 | 2243320 | 2243967 |
| 2832 BPSL2663 | 47 | 2272349           | 2270967 | 2165108 | 2163726 | 2180568 | 2179186 | 2260418 | 2259936 | 2421852 | 2420470 | 2598782 | 2600164 | 2023164 | 2021782 | 2228813 | 2227431 | 737492 | 738874 | 2245581 | 2244199 |
| 2833 BPSL2664 | 47 | 2273271           | 2272390 | 2166030 | 2165149 | 2181490 | 2180609 | 2261340 | 2260459 | 2422774 | 2421893 | 2597860 | 2598741 | 2024086 | 2023205 | 2229735 | 2228854 | 736570 | 737451 | 2246503 | 2245122 |
| 2834 BPSL2665 | 47 | 2274282           | 2273290 | 2167041 | 2166049 | 2182501 | 2181509 | 2262351 | 2261359 | 2423785 | 2422793 | 2596849 | 2597841 | 2025097 | 2024105 | 2230746 | 2229754 | 735559 | 736551 | 2247514 | 2246522 |
| 2835 BPSL2666 | 47 | 2275857           | 2274466 | 2168616 | 2167225 | 2184076 | 2182685 | 2263926 | 2262535 | 2425360 | 2423969 | 2595274 | 2596665 | 2026672 | 2025281 | 2232321 | 2230930 | 733984 | 735375 | 2249089 | 2247698 |
| 2836 BPSL2667 | 47 | 2276116           | 2277372 | 2168875 | 2170131 | 2184335 | 2185591 | 2264185 | 2265441 | 2425619 | 2426875 | 2595015 | 2593759 | 2026931 | 2028187 | 2232580 | 2233836 | 733725 | 732469 | 2249348 | 2250604 |
| 2837 BPSL2668 | 47 | 2277372           | 2278205 | 2170131 | 2170964 | 2185591 | 2186424 | 2265441 | 2266274 | 2426875 | 2427708 | 2593759 | 2592926 | 2028187 | 2029020 | 2233836 | 2234669 | 732469 | 731636 | 2250604 | 2251437 |
| 2838 BPSL2669 | 47 | 2278237           | 2279391 | 2170996 | 2172150 | 2186456 | 2187610 | 2266306 | 2267460 | 2427740 | 2428894 | 2592894 | 2591740 | 2029052 | 2030206 | 2234701 | 2235855 | 731604 | 730450 | 2251469 | 2252623 |
| 2839 BPSL2670 | 47 | 2279409           | 2280428 | 2172168 | 2173187 | 2187628 |         |         |         |         |         |         |         |         |         |         |         |        |        |         |         |



|      |                                    |    |         |         |         |         |         |         |         |         |         |         |         |         |         |         |         |         |        |        |         |         |
|------|------------------------------------|----|---------|---------|---------|---------|---------|---------|---------|---------|---------|---------|---------|---------|---------|---------|---------|---------|--------|--------|---------|---------|
| 2843 | BPSL2672                           | 48 | 2073662 | 2071752 | 1966420 | 1964510 | 1981872 | 1979962 | 2061707 | 2059797 | 2223046 | 2221136 | 2799303 | 2801213 | 1818921 | 1817011 | 2024839 | 2022929 | 933375 | 935285 | 2043556 | 2041646 |
| 2844 | BPSL2673                           | 48 | 2074679 | 2073672 | 1967437 | 1966430 | 1982889 | 1981882 | 2062724 | 2061717 | 2224063 | 2223056 | 2798286 | 2799293 | 1819938 | 1818931 | 2025856 | 2024849 | 932358 | 933365 | 2044573 | 2043566 |
| 2845 | Chr1_133_IS407A_C                  |    |         |         |         |         |         |         |         |         | 2224765 | 2226000 |         |         |         |         |         |         |        |        |         |         |
| 2846 | BPSL2674                           | 48 | 2075662 | 2074700 | 1968420 | 1967458 | 1983872 | 1982910 | 2063707 | 2062745 | 2226286 | 2225996 | 2797303 | 2798265 | 1820921 | 1819959 | 2026839 | 2025877 | 931375 | 932337 | 2045556 | 2044594 |
| 2847 | BPSL2675                           | 48 | 2076489 | 2075662 | 1969247 | 1968420 | 1984699 | 1983872 | 2064534 | 2063707 | 2227113 | 2226286 | 2796476 | 2797303 | 1821748 | 1820921 | 2027666 | 2026839 | 930548 | 931375 | 2046383 | 2045556 |
| 2848 | BPSL2676                           | 48 | 2078405 | 2076567 | 1971163 | 1969325 | 1986615 | 1984777 | 2066450 | 2064612 | 2229209 | 2227191 | 2794560 | 2796398 | 1823664 | 1821826 | 2029582 | 2027744 | 928632 | 930470 | 2048299 | 2046461 |
| 2849 | BPSL2677                           | 48 | 2080181 | 2078460 | 1972939 | 1971218 | 1988391 | 1986670 | 2068226 | 2066505 | 2230805 | 2229084 | 2792784 | 2794505 | 1825440 | 1823719 | 2031358 | 2029637 | 926856 | 928577 | 2050075 | 2048354 |
| 2850 | BPSL2678                           | 48 | 2081108 | 2080188 | 1973866 | 1972946 | 1989318 | 1988398 | 2069153 | 2068233 | 2231732 | 2230812 | 2791857 | 2792777 | 1826367 | 1825447 | 2032285 | 2031365 | 925929 | 926849 | 2051002 | 2050082 |
| 2851 | BPSL2679                           | 48 | 2082220 | 2081132 | 1974978 | 1973890 | 1990430 | 1989342 | 2070265 | 2069177 | 2232844 | 2231756 | 2790745 | 2791833 | 1827479 | 1826391 | 2033397 | 2032309 | 924817 | 925905 | 2052114 | 2051026 |
| 2852 | BPSL2680                           | 48 | 2083458 | 2082223 | 1976216 | 1974981 | 1991668 | 1990433 | 2071503 | 2070268 | 2234082 | 2232847 | 2789507 | 2790742 | 1828717 | 1827482 | 2034635 | 2033400 | 923579 | 924814 | 2053352 | 2052117 |
| 2853 | BPSL2681                           | 48 | 2084864 | 2083458 | 1977622 | 1976216 | 1993074 | 1991668 | 2072909 | 2071503 | 2235488 | 2234082 | 2788101 | 2789507 | 1830123 | 1828717 | 2036041 | 2034635 | 922173 | 923579 | 2054758 | 2053352 |
| 2854 | BPSL2682                           | 48 | 2085687 | 2084857 | 1978445 | 1977615 | 1993897 | 1993067 | 2073732 | 2072902 | 2236311 | 2235481 | 2787278 | 2788108 | 1830946 | 1830116 | 2036864 | 2036034 | 921350 | 922180 | 2055581 | 2054751 |
| 2855 | BPSL2683                           | 48 | 2086610 | 2085717 | 1979368 | 1978475 | 1994820 | 1993927 | 2074655 | 2073762 | 2237234 | 2236341 | 2786355 | 2787248 | 1831869 | 1830976 | 2037787 | 2036894 | 920427 | 921320 | 2056504 | 2055611 |
| 2856 | BPSL2684                           | 48 | 2087158 | 2086610 | 1979916 | 1979368 | 1995368 | 1994820 | 2075203 | 2074655 | 2237782 | 2237234 | 2785807 | 2786355 | 1832417 | 1831869 | 2038335 | 2037787 | 919879 | 920427 | 2057052 | 2056504 |
| 2857 | BPSL2685                           | 48 | 2088036 | 2087146 | 1988079 | 1979904 | 1996246 | 1995356 | 2076081 | 2075191 | 2238660 | 2237770 | 2784929 | 2785819 | 1833295 | 1832405 | 2039213 | 2038323 | 919001 | 919891 | 2057930 | 2057040 |
| 2858 | BPSL2686                           | 48 | 2089109 | 2088051 | 1981867 | 1980809 | 1997319 | 1996261 | 2077154 | 2076096 | 2239733 | 2238675 | 2783856 | 2784914 | 1834368 | 1833310 | 2040286 | 2039228 | 917928 | 918986 | 2059003 | 2057945 |
| 2859 | BPSL2687                           | 48 | 2089487 | 2090332 | 1982245 | 1983090 | 1997697 | 1998542 | 2077532 | 2078377 | 2240111 | 2240956 | 2783478 | 2782633 | 1834746 | 1835591 | 2040664 | 2041509 | 917550 | 916705 | 2059381 | 2060226 |
| 2860 | BPSL2688                           | 48 | 2091334 | 2090468 | 1984092 | 1983226 | 1999544 | 1998678 | 2079379 | 2078513 | 2241958 | 2241092 | 2781631 | 2782497 | 1836593 | 1835727 | 2042511 | 2041645 | 915703 | 916569 | 2061228 | 2060362 |
| 2861 | BPSL2689                           | 48 | 2092626 | 2091352 | 1985384 | 1984110 | 2000836 | 1999562 | 2080671 | 2079397 | 2243250 | 2241976 | 2780339 | 2781613 | 1837885 | 1836611 | 2043803 | 2042529 | 914411 | 915685 | 2062520 | 2061246 |
| 2862 | BPSL2690                           | 48 | 2093749 | 2092721 | 1986507 | 1985479 | 2001959 | 2000931 | 2081794 | 2080766 | 2244373 | 2243345 | 2779216 | 2780244 | 1839008 | 1837980 | 2044926 | 2043898 | 913288 | 914316 | 2063643 | 2062615 |
| 2863 | BPSL2691                           | 48 | 2094348 | 2093833 | 1987106 | 1986591 | 2002558 | 2002043 | 2082393 | 2081878 | 2244972 | 2244457 | 2778617 | 2779132 | 1839607 | 1839092 | 2045525 | 2045010 | 912689 | 913204 | 2064242 | 2063727 |
| 2864 | BPSL2692                           | 48 | 2094775 | 2094338 | 1987533 | 1987096 | 2002985 | 2002548 | 2082820 | 2082383 | 2245399 | 2244962 | 2778190 | 2778627 | 1840034 | 1839597 | 2045952 | 2045515 | 912262 | 912699 | 2064669 | 2064232 |
| 2865 | BPSL2693                           | 48 | 2095350 | 2094775 | 1988108 | 1987533 | 2003560 | 2002985 | 2083395 | 2082820 | 2245974 | 2245399 | 2777615 | 2778190 | 1840609 | 1840034 | 2046527 | 2045952 | 911687 | 912262 | 2065244 | 2064669 |
| 2866 | BPSL2694                           | 48 | 2096887 | 2095559 | 1989645 | 1988317 | 2005097 | 2003769 | 2084932 | 2083604 | 2247511 | 2246183 | 2776078 | 2777406 | 1842146 | 1840818 | 2048064 | 2046736 | 910150 | 911478 | 2066781 | 2065453 |
| 2867 | BPSL2695                           | 48 | 2097156 | 2096899 | 1989914 | 1989747 | 2005366 | 2005199 | 2085201 | 2085034 | 2247780 | 2247613 | 2775809 | 2775976 | 1842415 | 1842248 | 2048333 | 2048166 | 909881 | 910048 | 2067050 | 2066883 |
| 2868 | BPSL2696                           | 48 | 2097376 | 2098221 | 1990134 | 1990979 | 2005586 | 2006431 | 2085421 | 2086266 | 2248000 | 2248845 | 2775589 | 2774744 | 1842635 | 1843480 | 2048553 | 2049398 | 909661 | 908816 | 2067270 | 2068115 |
| 2869 | BPSL2697                           | 48 | 2100307 | 2098670 | 1993065 | 1991428 | 2008517 | 2006880 | 2088360 | 2086723 | 2250839 | 2249202 | 2772722 | 2774359 | 1845478 | 1843841 | 2051444 | 2049807 | 906714 | 908351 | 2070185 | 2068548 |
| 2870 | BPSL2698                           | 48 | 2100648 | 2100358 | 1993406 | 1993116 | 2008858 | 2008568 | 2088701 | 2088411 | 2251180 | 2250890 | 2772381 | 2772671 | 1845819 | 1845529 | 2051785 | 2051495 | 906373 | 906663 | 2070526 | 2070236 |
| 2871 | BPSL2699_putative exported protein | 48 |         |         |         |         |         |         |         |         |         |         | 2769632 | 2771788 | 1848568 | 1846412 | 2054534 | 2052378 |        |        |         |         |
| 2872 | BPSL2700                           | 48 | 2103929 | 2103498 | 1996687 | 1996256 | 2012139 | 2011708 | 2091982 | 2091551 | 2254461 | 2254030 | 2768140 | 2768571 | 1850060 | 1849629 | 2056026 | 2055595 | 903092 | 903523 | 2073807 | 2073376 |
| 2873 | BPSL2701                           | 48 | 2104178 | 2105182 | 1996936 | 1997940 | 2012388 | 2013392 | 2092231 | 2093235 | 2254710 | 2255714 | 2767891 | 2766887 | 1850309 | 1851313 | 2056275 | 2057279 | 902843 | 901839 | 2074056 | 2075060 |
| 2874 | BPSL2702                           | 48 | 2106084 | 2105212 | 1998842 | 1997970 | 2014294 | 2013422 | 2094137 | 2093265 | 2256616 | 2255744 | 2765985 | 2766857 | 1852215 | 1851343 | 2058181 | 2057309 | 900937 | 901809 | 2075962 | 2075090 |
| 2875 | BPSL2703                           | 48 | 2107183 | 2106671 | 1999941 | 1999429 | 2015393 | 2014881 | 2095236 | 2094724 | 2257715 | 2257203 | 2764886 | 2765398 | 1853314 | 1852802 | 2059280 | 2058768 | 899838 | 900350 | 2077061 | 2076549 |
| 2876 | BPSL2704                           | 48 | 2108204 | 2107302 | 2000962 | 2000060 | 2016414 | 2015512 | 2096257 | 2095355 | 2258736 | 2257834 | 2763865 | 2764677 | 1854335 | 1853433 | 2060301 | 2059399 | 898817 | 899719 | 2078082 | 2077180 |
| 2877 | BPSL2705                           | 48 | 2109454 | 2108204 | 2002212 | 2000962 | 2017664 | 2016414 | 2097507 | 2096257 | 2259986 | 2258736 | 2762615 | 2763865 | 1855585 | 1854335 | 2061551 | 2060301 | 897567 | 898817 | 2079332 | 2078082 |
| 2878 | BPSL2706                           | 48 | 2111112 | 2109517 | 2003870 | 2002275 | 2019322 | 2017727 | 2099165 | 2097570 | 2261644 | 2260049 | 2760957 | 2762552 | 1857243 | 1855648 | 2063209 | 2061614 | 895909 | 897504 | 2080990 | 2079395 |
| 2879 | BPSL2707                           | 48 | 2112296 | 2111856 | 2005054 | 2004614 | 2020506 | 2020066 | 2100349 | 2099909 | 2262828 | 2262388 | 2759773 | 2760213 | 1858427 | 1857987 | 2064393 | 2063953 | 894725 | 895165 | 2082174 | 2081734 |
| 2880 | BPSL2708                           | 48 | 2112577 | 2113806 | 2005335 | 2006564 | 2020787 | 2022016 | 2100630 | 2101859 | 2263109 | 2264338 | 2759492 | 2758263 | 1858708 | 1859937 | 2064674 | 2065903 | 894444 | 893215 | 2082455 | 2083684 |
| 2881 | BPSL2709                           | 48 | 2113991 | 2114575 | 2006749 | 2007333 | 2022201 | 2022785 | 2102044 | 2102628 | 2264523 | 2265107 | 2758078 | 2757494 | 1860122 | 1860706 | 2066088 | 2066672 | 893030 | 892446 | 2083869 | 2084453 |
| 2882 | BPSL2710                           | 48 | 2114575 | 2115099 | 2007333 | 2007857 | 2022785 | 2023309 | 2102628 | 2103152 | 2265107 | 2265631 | 2757494 | 2756970 | 1860706 | 1861230 | 2066672 | 2067196 | 892446 | 891922 | 2084453 | 2084977 |
| 2883 | BPSL2711                           | 48 | 2115452 | 2116072 | 2008210 | 2008830 | 2023662 | 2024282 | 2103505 | 2104125 | 2265984 | 2266604 | 2756617 | 2755997 | 1861583 | 1862203 | 2067549 | 2068169 | 891569 | 890949 | 2085330 | 2085950 |
| 2884 | BPSL2712                           | 48 | 2116549 | 2117682 | 2009307 | 2010440 | 2024759 | 2025892 | 2104602 | 2105735 | 2267072 | 2268205 | 2755502 | 2754369 | 1862698 | 1863831 | 2068664 | 2069797 | 890481 | 889348 | 2086418 | 2087551 |
| 2885 | BPSL2713                           | 48 | 2117815 | 2119254 | 2010573 | 2012012 | 2026025 | 2027464 | 2105868 | 2107307 | 2268338 | 2269777 | 2754236 | 2752797 | 1863964 | 1865403 | 2069930 | 2071369 | 889215 | 887776 | 2087684 | 2089123 |
| 2886 | BPSL2714                           | 48 | 2119754 | 2120539 | 2012512 | 2013297 | 2027964 | 2028749 | 2107807 | 2108592 | 2270277 | 2271062 | 2752297 | 2751512 | 1865903 | 1866688 | 2071869 | 2072654 | 887276 | 886491 | 2089623 | 2090408 |
| 2887 | BPSL2715                           | 48 | 2122722 | 2120878 | 2015480 | 2013636 | 2030932 | 2029088 | 2110775 | 2108931 | 2273245 | 2271401 | 2749329 | 2751173 | 1868871 | 1867027 | 2074837 | 2072993 | 884308 | 886152 | 2092591 | 2090747 |
| 2888 | BPSL2716                           | 48 | 2125427 | 2123331 | 2018185 | 2016089 | 2033637 | 2031541 | 2113480 | 2111384 | 2275950 | 2273854 | 2746624 | 2748720 | 1871576 | 1869480 | 2077542 | 2075446 | 881603 | 883699 | 2095278 | 2093200 |
| 2889 | BPSL2717                           | 48 | 2125915 | 2125550 | 2018673 | 2018308 | 2034125 | 2033760 | 2113968 | 2113603 | 2276438 | 2276073 | 2746136 | 2746501 |         |         |         |         |        |        |         |         |



|               |    |                   |         |         |         |         |         |         |         |         |         |         |         |         |         |         |         |        |        |         |         |
|---------------|----|-------------------|---------|---------|---------|---------|---------|---------|---------|---------|---------|---------|---------|---------|---------|---------|---------|--------|--------|---------|---------|
| 2894 BPSL2722 | 48 | 2131799           | 2131008 | 2024557 | 2023766 | 2040009 | 2039218 | 2119852 | 2119061 | 2282331 | 2281540 | 2740252 | 2741043 | 1877948 | 1877157 | 2083914 | 2083123 | 875222 | 876013 | 2101661 | 2100870 |
| 2895 BPSL2723 | 48 | 2132590           | 2131796 | 2025348 | 2024554 | 2040800 | 2040006 | 2120643 | 2119849 | 2283122 | 2282328 | 2739461 | 2740255 | 1878739 | 1877945 | 2084705 | 2083911 | 874431 | 875225 | 2102452 | 2101658 |
| 2896 BPSL2724 | 48 | 2134902           | 2132635 | 2027660 | 2025393 | 2043112 | 2040845 | 2122955 | 2120688 | 2285434 | 2283167 | 2737149 | 2739416 | 1881051 | 1878784 | 2087017 | 2084750 | 872119 | 874386 | 2104764 | 2102497 |
| 2897 BPSL2725 | 48 | 2135863           | 2135396 | 2028621 | 2028154 | 2044073 | 2043606 | 2123916 | 2123449 | 2286395 | 2285928 | 2736188 | 2736655 | 1882012 | 1881545 | 2087978 | 2087511 | 871158 | 871625 | 2105725 | 2105258 |
| 2898 BPSL2726 | 48 | 2136764           | 2135985 | 2029522 | 2028743 | 2044974 | 2044195 | 2124817 | 2124038 | 2287296 | 2286517 | 2735287 | 2736066 | 1882913 | 1882134 | 2088879 | 2088100 | 870257 | 871036 | 2106626 | 2105847 |
| 2899 BPSL2727 | 48 | 2139510           | 2137150 | 2032268 | 2029908 | 2047720 | 2045360 | 2127563 | 2125203 | 2290042 | 2287682 | 2732541 | 2734901 | 1885659 | 1883299 | 2091625 | 2089265 | 867511 | 869871 | 2109372 | 2107012 |
| 2900 BPSL2728 | 48 | 2141056           | 2139542 | 2033814 | 2032300 | 2049266 | 2047752 | 2129109 | 2127595 | 2291588 | 2290074 | 2730995 | 2732509 | 1887205 | 1885691 | 2093171 | 2091657 | 865965 | 867479 | 2110918 | 2109404 |
| 2901 BPSL2729 | 48 | 2141336           | 2142556 | 2034094 | 2035314 | 2049546 | 2050766 | 2129389 | 2130609 | 2291868 | 2293088 | 2730715 | 2729495 | 1887485 | 1888705 | 2093451 | 2094671 | 865685 | 864465 | 2111198 | 2112418 |
| 2902 BPSL2730 | 48 | 2143962           | 2143015 | 2036720 | 2035773 | 2052172 | 2051225 | 2132015 | 2131068 | 2294458 | 2293511 | 2728107 | 2729054 | 1890093 | 1889146 | 2096086 | 2095139 | 863068 | 864015 | 2113797 | 2112850 |
| 2903 BPSL2731 | 48 | 2143993           | 2144988 | 2036751 | 2037746 | 2052203 | 2053198 | 2132046 | 2133041 | 2294489 | 2295484 | 2728076 | 2727081 | 1890124 | 1891119 | 2096117 | 2097112 | 863037 | 862042 | 2113828 | 2114823 |
| 2904 BPSL2732 | 48 | 2146230           | 2145019 | 2038988 | 2037777 | 2054440 | 2053229 | 2134283 | 2133072 | 2296726 | 2295515 | 2725839 | 2727050 | 1892361 | 1891150 | 2098354 | 2097143 | 860800 | 862011 | 2116065 | 2114854 |
| 2905          | 48 | Chr1_134_IS407A_B |         |         |         |         |         |         |         |         |         | 2724302 | 2725537 | 1892663 | 1893898 | 2098656 | 2099891 |        |        |         |         |
| 2906 BPSL2733 | 48 | 2147128           | 2148105 | 2039886 | 2040863 | 2055338 | 2056315 | 2135181 | 2136158 | 2297624 | 2298601 | 2724305 | 2723358 | 1894499 | 1895476 | 2100492 | 2101469 | 859902 | 858925 | 2116963 | 2117940 |
| 2907 BPSL2734 | 48 | 2148155           | 2149156 | 2040913 | 2041914 | 2056365 | 2057366 | 2136208 | 2137209 | 2298651 | 2299652 | 2723308 | 2722307 | 1895526 | 1896527 | 2101519 | 2102520 | 858875 | 857874 | 2117990 | 2118991 |
| 2908 BPSL2735 | 48 | 2149587           | 2150243 | 2042345 | 2043001 | 2057797 | 2058453 | 2137640 | 2138296 | 2300091 | 2300747 | 2721868 | 2721212 | 1896982 | 1897638 | 2102959 | 2103615 | 857443 | 856787 | 2119430 | 2120086 |
| 2909 BPSL2736 | 48 | 2150362           | 2151528 | 2043120 | 2044286 | 2058572 | 2059738 | 2138415 | 2139581 | 2300866 | 2302032 | 2721093 | 2719927 | 1897757 | 1898923 | 2103734 | 2104900 | 856668 | 855502 | 2120205 | 2121371 |
| 2910 BPSL2737 | 48 | 2151799           | 2152992 | 2044557 | 2045750 | 2060009 | 2061202 | 2139852 | 2141045 | 2302303 | 2303496 | 2719663 | 2718470 | 1899187 | 1900380 | 2105164 | 2106357 | 855231 | 854038 | 2121642 | 2122835 |
| 2911 BPSL2738 | 48 | 2154723           | 2153419 | 2047481 | 2046177 | 2062933 | 2061629 | 2142776 | 2141472 | 2305227 | 2303923 | 2716739 | 2718043 | 1902111 | 1900807 | 2108088 | 2106784 | 852307 | 853611 | 2124566 | 2123262 |
| 2912 BPSL2739 | 48 | 2156072           | 2154723 | 2048830 | 2047481 | 2064282 | 2062933 | 2144125 | 2142776 | 2306576 | 2305227 | 2715390 | 2716739 | 1903460 | 1902111 | 2109140 | 2108967 | 850958 | 852307 | 2125915 | 2124566 |
| 2913 BPSL2740 | 48 | 2157428           | 2156076 | 2050186 | 2048834 | 2065638 | 2064286 | 2145481 | 2144129 | 2307932 | 2306580 | 2714034 | 2715386 | 1904816 | 1903464 | 2110496 | 2109144 | 849602 | 850954 | 2127271 | 2125919 |
| 2914 BPSL2741 | 48 | 2157646           | 2157437 | 2050404 | 2050195 | 2065856 | 2065647 | 2145699 | 2145490 | 2308150 | 2307941 | 2713816 | 2714025 | 1905034 | 1904825 | 2110714 | 2110505 | 849384 | 849593 | 2127489 | 2127280 |
| 2915 BPSL2742 | 48 | 2159350           | 2157692 | 2052108 | 2050450 | 2067560 | 2065902 | 2147403 | 2145745 | 2309854 | 2308196 | 2712112 | 2713770 | 1906738 | 1905080 | 2112418 | 2110760 | 847680 | 849338 | 2129193 | 2127535 |
| 2916 BPSL2743 | 48 | 2160326           | 2159373 | 2053084 | 2052131 | 2068536 | 2067583 | 2148379 | 2147426 | 2310830 | 2309877 | 2711136 | 2712089 | 1907714 | 1906761 | 2113394 | 2112441 | 846704 | 847657 | 2130169 | 2129216 |
| 2917 BPSL2744 | 48 | 2160583           | 2161386 | 2053341 | 2054144 | 2068793 | 2069596 | 2148636 | 2149439 | 2311087 | 2311890 | 2710879 | 2710076 | 1907971 | 1908774 | 2113651 | 2114454 | 846447 | 845644 | 2130426 | 2131229 |
| 2918 BPSL2745 | 48 | 2162204           | 2161752 | 2054962 | 2054510 | 2070414 | 2069962 | 2150257 | 2149805 | 2312708 | 2312256 | 2709258 | 2709710 | 1909592 | 1909140 | 2115272 | 2114820 | 844826 | 845278 | 2132067 | 2131615 |
| 2919 BPSL2746 | 48 | 2163481           | 2162660 | 2056239 | 2055418 | 2071699 | 2070878 | 2151550 | 2150729 | 2314161 | 2313340 | 2707941 | 2708762 | 1911037 | 1910216 | 2116605 | 2115784 | 843373 | 844194 | 2133552 | 2132731 |
| 2920 BPSL2747 | 48 | 2163471           | 2164709 | 2056229 | 2057467 | 2071689 | 2072927 | 2151540 | 2152778 | 2314151 | 2315389 | 2707951 | 2706713 | 1911027 | 1912265 | 2116595 | 2117833 | 843383 | 842145 | 2133542 | 2134780 |
| 2921 BPSL2748 | 48 | 2165601           | 2164966 | 2058359 | 2057724 | 2073819 | 2073184 | 2153670 | 2153035 | 2316281 | 2315646 | 2705821 | 2706456 | 1913157 | 1912522 | 2118725 | 2118090 | 841253 | 841888 | 2135672 | 2135037 |
| 2922 BPSL2749 | 48 | 2165929           | 2166228 | 2058687 | 2058986 | 2074147 | 2074446 | 2153998 | 2154297 | 2316609 | 2316908 | 2705493 | 2705194 | 1913485 | 1913784 | 2119053 | 2119352 | 840925 | 840626 | 2136000 | 2136299 |
| 2923 BPSL2750 | 48 | 2166355           | 2166741 | 2059113 | 2059499 | 2074573 | 2074959 | 2154424 | 2154810 | 2317035 | 2317421 | 2705067 | 2704681 | 1913911 | 1914297 | 2119479 | 2119865 | 840499 | 840113 | 2136426 | 2136812 |
| 2924 BPSL2751 | 48 | 2166794           | 2167249 | 2059552 | 2060007 | 2075012 | 2075467 | 2154863 | 2155318 | 2317474 | 2317929 | 2704628 | 2704173 | 1914350 | 1914805 | 2119918 | 2120373 | 840060 | 839605 | 2136865 | 2137320 |
| 2925 BPSL2752 | 48 | 2167809           | 2167360 | 2060567 | 2060118 | 2076027 | 2075578 | 2155878 | 2155429 | 2318489 | 2318040 | 2703613 | 2704062 | 1915365 | 1914916 | 2120933 | 2120484 | 839045 | 839494 | 2137880 | 2137431 |
| 2926 BPSL2753 | 48 | 2168425           | 2167832 | 2061183 | 2060590 | 2076643 | 2076050 | 2156494 | 2155901 | 2319105 | 2318512 | 2702997 | 2703590 | 1915981 | 1915388 | 2121549 | 2120956 | 838429 | 839022 | 2138496 | 2137903 |
| 2927 BPSL2754 | 48 | 2169210           | 2168428 | 2061968 | 2061186 | 2077428 | 2076646 | 2157279 | 2156497 | 2319890 | 2319108 | 2702212 | 2702994 | 1916766 | 1915984 | 2122334 | 2121552 | 837644 | 838426 | 2139281 | 2138499 |
| 2928 BPSL2755 | 48 | 2169632           | 2169210 | 2062390 | 2061968 | 2077850 | 2077428 | 2157701 | 2157279 | 2320312 | 2319890 | 2701790 | 2702212 | 1917188 | 1916766 | 2122756 | 2122334 | 837222 | 837644 | 2139703 | 2139281 |
| 2929 BPSL2756 | 48 | 2170174           | 2169617 | 2062932 | 2062375 | 2078392 | 2077835 | 2158243 | 2157686 | 2320854 | 2320297 | 2701248 | 2701805 | 1917730 | 1917173 | 2123298 | 2122741 | 836680 | 837237 | 2140245 | 2139688 |
| 2930 BPSL2757 | 48 | 2170839           | 2170363 | 2063597 | 2063121 | 2079057 | 2078581 | 2158908 | 2158432 | 2321519 | 2321043 | 2700583 | 2700559 | 1918395 | 1917919 | 2123963 | 2123487 | 836015 | 836491 | 2140910 | 2140434 |
| 2931 BPSL2758 | 48 | 2172093           | 2170849 | 2064851 | 2063607 | 2080311 | 2079067 | 2160162 | 2158918 | 2322773 | 2321529 | 2699329 | 2700573 | 1919649 | 1918405 | 2125217 | 2123973 | 834761 | 836005 | 2142164 | 2140920 |
| 2932 BPSL2759 | 48 | 2172545           | 2173288 | 2065303 | 2066046 | 2080763 | 2081506 | 2160614 | 2161357 | 2323225 | 2323968 | 2698877 | 2698134 | 1920101 | 1920844 | 2125669 | 2126412 | 834309 | 833566 | 2142616 | 2143359 |
| 2933 BPSL2760 | 48 | 2173388           | 2173879 | 2066146 | 2066637 | 2081606 | 2082097 | 2161457 | 2161948 | 2324068 | 2324559 | 2698034 | 2697543 | 1920944 | 1921435 | 2126512 | 2127003 | 833466 | 832975 | 2143459 | 2143950 |
| 2934 BPSL2761 | 48 | 2173948           | 2174733 | 2066706 | 2067491 | 2082166 | 2082951 | 2162017 | 2162802 | 2324628 | 2325413 | 2697474 | 2696689 | 1921504 | 1922289 | 2127072 | 2127857 | 832906 | 832121 | 2144019 | 2144804 |
| 2935 BPSL2762 | 48 | 2174747           | 2175193 | 2067505 | 2067951 | 2082965 | 2083411 | 2162816 | 2163262 | 2325427 | 2325873 | 2696675 | 2696229 | 1922303 | 1922749 | 2127871 | 2128317 | 832107 | 831661 | 2144818 | 2145264 |
| 2936 BPSL2763 | 48 | 2175193           | 2176215 | 2067951 | 2068973 | 2083411 | 2084433 | 2163262 | 2164284 | 2325873 | 2326895 | 2696229 | 2695207 | 1922749 | 1923771 | 2128317 | 2129339 | 831661 | 830639 | 2145264 | 2146286 |
| 2937 BPSL2764 | 48 | 2176315           | 2177613 | 2069073 | 2070371 | 2084533 | 2085831 | 2164384 | 2165682 | 2326995 | 2328293 | 2695107 | 2693809 | 1923871 | 1925169 | 2129439 | 2130737 | 830539 | 829241 | 2146386 | 2147684 |
| 2938 BPSL2765 | 48 | 2177634           | 2178143 | 2070392 | 2070901 | 2085852 | 2086361 | 2165703 | 2166212 | 2328314 | 2328823 | 2693788 | 2693279 | 1925190 | 1925699 | 2130758 | 2131267 | 829220 | 828711 | 2147705 | 2148214 |
| 2939 BPSL2766 | 48 | 2178166           | 2178912 | 2070924 | 2071670 | 2086384 | 2087130 | 2166235 | 2166981 | 2328846 | 2329592 | 2693256 | 2692510 | 1925722 | 1926468 | 2131290 | 2132036 | 828688 | 827942 | 2148237 | 2148983 |
| 2940          | 48 | Chr1_135_IS407A_A |         |         |         |         |         |         |         |         |         | 2690743 | 2691978 | 1927000 | 1928235 | 2132568 | 2133803 | 826175 | 827410 | 2149515 | 2150750 |
| 2941 BPSL2767 |    |                   |         |         |         |         |         |         |         |         |         |         |         |         |         |         |         |        |        |         |         |



|               |    |         |         |         |         |         |         |         |         |         |         |         |         |         |         |         |         |        |        |                |                |
|---------------|----|---------|---------|---------|---------|---------|---------|---------|---------|---------|---------|---------|---------|---------|---------|---------|---------|--------|--------|----------------|----------------|
| 2996 BPSL2820 | 49 | 2414198 | 2414881 | 2307059 | 2307742 | 2322416 | 2323099 | 2402241 | 2402924 | 2564346 | 2565029 | 1113974 | 1114657 | 2165240 | 2165923 | 2369694 | 2370377 | 509560 | 508877 | 2464151        | 2464834        |
| 2997 BPSL2821 | 49 | 2414881 | 2416425 | 2307742 | 2309286 | 2323099 | 2324643 | 2402924 | 2404468 | 2565029 | 2566573 | 1114657 | 1116201 | 2165923 | 2167467 | 2370377 | 2371921 | 508877 | 507333 | 2464834        | 2466378        |
| 2998 BPSL2822 | 49 | 2416465 | 2416989 | 2309326 | 2309850 | 2324683 | 2325207 | 2404508 | 2405032 | 2566613 | 2567137 | 1116241 | 1116765 | 2167507 | 2168031 | 2371961 | 2372485 | 507293 | 506769 | 2466418        | 2466945        |
| 2999 BPSL2823 | 49 | 2416989 | 2417669 | 2309850 | 2310530 | 2325207 | 2325887 | 2405032 | 2405712 | 2567137 | 2567817 | 1116765 | 1117445 | 2168031 | 2168711 | 2372485 | 2373165 | 506769 | 506089 | 2466945        | 2467625        |
| 3000 BPSL2824 | 49 | 2417737 | 2418549 | 2310598 | 2311410 | 2325955 | 2326767 | 2405780 | 2406592 | 2567885 | 2568697 | 1117513 | 1118325 | 2168779 | 2169591 | 2373233 | 2374045 | 506021 | 505209 | 2467693        | 2468505        |
| 3001 BPSL2825 | 49 | 2420746 | 2418731 | 2313607 | 2311592 | 2328964 | 2326949 | 2408789 | 2406774 | 2570894 | 2568879 | 1120522 | 1118507 | 2171788 | 2169773 | 2376242 | 2374227 | 503012 | 505027 | 2470702        | 2468687        |
| 3002 BPSL2826 | 49 | 2421898 | 2420771 | 2314759 | 2313632 | 2330116 | 2328989 | 2409941 | 2408814 | 2572046 | 2570919 | 1121674 | 1120547 | 2172940 | 2171813 | 2377394 | 2376267 | 501860 | 502987 | 2471854        | 2470727        |
| 3003 BPSL2827 | 49 | 2424117 | 2422168 | 2316978 | 2315029 | 2332335 | 2330386 | 2412160 | 2410211 | 2574265 | 2572316 | 1123893 | 1121944 | 2175159 | 2173210 | 2379614 | 2377722 | 499641 | 501590 | 2474073        | 2472124        |
| 3004 BPSL2828 | 49 | 2424694 | 2424266 | 2317555 | 2317127 | 2332912 | 2332484 | 2412737 | 2412309 | 2574842 | 2574414 | 1124470 | 1124042 | 2175736 | 2175308 | 2380191 | 2379763 | 499064 | 499492 | 2474650        | 2474222        |
| 3005 BPSL2829 | 49 | 2425267 | 2424713 | 2318128 | 2317574 | 2333485 | 2332931 | 2413310 | 2412756 | 2575415 | 2574861 | 1125043 | 1124489 | 2176309 | 2175755 | 2380764 | 2380210 | 498491 | 499045 | 2475223        | 2474669        |
| 3006 BPSL2830 | 49 | 2426171 | 2425767 | 2319032 | 2318628 | 2334389 | 2333985 | 2414214 | 2413810 | 2576319 | 2575915 | 1125947 | 1125543 | 2177213 | 2176809 | 2381668 | 2381264 | 497587 | 497991 | 2476127        | 2475723        |
| 3007 BPSL2831 | 49 | 2427280 | 2426180 | 2320141 | 2319041 | 2335498 | 2334398 | 2415323 | 2414223 | 2577428 | 2576328 | 1127056 | 1125956 | 2178322 | 2177222 | 2382777 | 2381677 | 496478 | 497578 | 2477236        | 2476136        |
| 3008 BPSL2832 | 49 | 2428475 | 2427456 | 2321336 | 2320317 | 2336693 | 2335674 | 2416518 | 2415499 | 2578623 | 2577604 | 1128251 | 1127232 | 2179517 | 2178498 | 2383972 | 2382953 | 495283 | 496302 | 2478431        | 2477412        |
| 3009 BPSL2833 | 49 | 2428609 | 2429508 | 2321470 | 2322369 | 2336827 | 2337726 | 2416652 | 2417551 | 2578757 | 2579656 | 1128385 | 1129284 | 2179651 | 2180550 | 2384106 | 2385005 | 495149 | 494250 | 2478565        | 2479464        |
| 3010 BPSL2834 | 49 | 2429541 | 2431187 | 2322402 | 2324048 | 2337759 | 2339405 | 2417584 | 2419230 | 2579689 | 2581335 | 1129317 | 1130963 | 2180583 | 2182229 | 2385038 | 2386684 | 494217 | 492571 | 2479497        | 2481035        |
| 3011          | 49 |         |         |         |         |         |         |         |         |         |         |         |         |         |         |         |         |        |        | <b>2727692</b> | <b>2728537</b> |
| 3012 BPSL2835 | 49 | 2434372 | 2431592 | 2327233 | 2324453 | 2342590 | 2339810 | 2422371 | 2419591 | 2584520 | 2581740 | 1134148 | 1131368 | 2185414 | 2182634 | 2389869 | 2387089 | 489386 | 492166 | 2724729        | 2727509        |
| 3013 BPSL2836 | 49 | 2434533 | 2438723 | 2327394 | 2331584 | 2342751 | 2346941 | 2422532 | 2426722 | 2584681 | 2588871 | 1134309 | 1138499 | 2185575 | 2189765 | 2390030 | 2394220 | 489225 | 485035 | 2724568        | 2720378        |
| 3014 BPSL2837 | 49 | 2438778 | 2439602 | 2331639 | 2332463 | 2346996 | 2347820 | 2426777 | 2427601 | 2588926 | 2589750 | 1138554 | 1139378 | 2189820 | 2190644 | 2394275 | 2395099 | 484980 | 484156 | 2720323        | 2719499        |
| 3015 BPSL2838 | 49 | 2439685 | 2441178 | 2332546 | 2334039 | 2347903 | 2349396 | 2427684 | 2429177 | 2589833 | 2591326 | 1139461 | 1140954 | 2190727 | 2192220 | 2395182 | 2396675 | 484073 | 482580 | 2719416        | 2717923        |
| 3016 BPSL2839 | 49 | 2441591 | 2442661 | 2334452 | 2335522 | 2349809 | 2350879 | 2429590 | 2430660 | 2591739 | 2592809 | 1141367 | 1142437 | 2192633 | 2193703 | 2397088 | 2398158 | 482167 | 481097 | 2717510        | 2716440        |
| 3017          | 49 | 2442898 | 2444470 | 2335759 | 2337331 | 2351116 | 2352688 | 2430897 | 2432469 | 2593046 | 2594618 | 1142674 | 1144265 | 2193940 | 2195512 | 2398395 | 2399967 | 479288 | 480860 | 2714631        | 2716203        |
| 3018          | 49 | 2525029 | 2526601 | 2418316 | 2419888 | 2434455 | 2436027 | 2513056 | 2514628 | 2675065 | 2676637 | 1224724 | 1226315 | 2576418 | 2577992 | 2478896 | 2480470 | 335753 | 337325 | 2571166        | 2572738        |
| 3019 BPSL2840 | 50 | 2523752 | 2524957 | 2417039 | 2418244 | 2433178 | 2434383 | 2511779 | 2512984 | 2673788 | 2674993 | 1223447 | 1224652 | 2575141 | 2576346 | 2477619 | 2478824 | 334476 | 335681 | 2569889        | 2571094        |
| 3020 BPSL2841 | 50 | 2523068 | 2523637 | 2416355 | 2416924 | 2432494 | 2433063 | 2511095 | 2511664 | 2673104 | 2673673 | 1222763 | 1223332 | 2574457 | 2575026 | 2476935 | 2477504 | 333792 | 334361 | 2569205        | 2569774        |
| 3021 BPSL2842 | 50 | 2522904 | 2521498 | 2416191 | 2414785 | 2432330 | 2430924 | 2510931 | 2509525 | 2672940 | 2671534 | 1222599 | 1221193 | 2574293 | 2572887 | 2476771 | 2475365 | 333628 | 332222 | 2569041        | 2567635        |
| 3022 BPSL2843 | 50 | 2521430 | 2519940 | 2414717 | 2413227 | 2430856 | 2429366 | 2509457 | 2507967 | 2671466 | 2669976 | 1221125 | 1219635 | 2572819 | 2571329 | 2475297 | 2473807 | 321254 | 330664 | 2567567        | 2566077        |
| 3023 BPSL2844 | 50 | 2519835 | 2518750 | 2413122 | 2412037 | 2429261 | 2428176 | 2507862 | 2506777 | 2669871 | 2668786 | 1219530 | 1218445 | 2571224 | 2570139 | 2473702 | 2472617 | 330559 | 329474 | 2565972        | 2564887        |
| 3024 BPSL2845 | 50 | 2518740 | 2517517 | 2412027 | 2410804 | 2428166 | 2426943 | 2506767 | 2505544 | 2668776 | 2667553 | 1218435 | 1217212 | 2570129 | 2568906 | 2472607 | 2471384 | 329464 | 328241 | 2564877        | 2563654        |
| 3025 BPSL2846 | 50 | 2517295 | 2516600 | 2410582 | 2409887 | 2426721 | 2426026 | 2505322 | 2504627 | 2667331 | 2666636 | 1216990 | 1216295 | 2568684 | 2567989 | 2471162 | 2470467 | 328019 | 327324 | 2563432        | 2562737        |
| 3026 BPSL2847 | 50 | 2516561 | 2515752 | 2409848 | 2409039 | 2425987 | 2425178 | 2504588 | 2503779 | 2666597 | 2665788 | 1216256 | 1215447 | 2567950 | 2567141 | 2470428 | 2469619 | 327285 | 326476 | 2562698        | 2561889        |
| 3027 BPSL2848 | 50 | 2514497 | 2515309 | 2407784 | 2408596 | 2423923 | 2424735 | 2502524 | 2503336 | 2664533 | 2665345 | 1214192 | 1215004 | 2565886 | 2566698 | 2468364 | 2469176 | 325221 | 326033 | 2560634        | 2561446        |
| 3028 BPSL2849 | 50 | 2513505 | 2514497 | 2406792 | 2407784 | 2422931 | 2423923 | 2501532 | 2502524 | 2663541 | 2664533 | 1213200 | 1214192 | 2564894 | 2565886 | 2467372 | 2468364 | 324229 | 325221 | 2559642        | 2560634        |
| 3029 BPSL2850 | 50 | 2512451 | 2513419 | 2405738 | 2406706 | 2421877 | 2422845 | 2500443 | 2501381 | 2662483 | 2663310 | 1212146 | 1213114 | 2563840 | 2564808 | 2466226 | 2467173 | 323175 | 324143 | 2558588        | 2559556        |
| 3030 BPSL2851 | 50 | 2511135 | 2512262 | 2404422 | 2405549 | 2420561 | 2421688 | 2499127 | 2500254 | 2661167 | 2662294 | 1210830 | 1211957 | 2562524 | 2563651 | 2464910 | 2466037 | 321859 | 322986 | 2557272        | 2558399        |
| 3031 BPSL2852 | 50 | 2510323 | 2511117 | 2403610 | 2404404 | 2419749 | 2420543 | 2498315 | 2499109 | 2660355 | 2661149 | 1210018 | 1210812 | 2561712 | 2562506 | 2464098 | 2464892 | 321047 | 321841 | 2556460        | 2557254        |
| 3032 BPSL2853 | 50 | 2509544 | 2510311 | 2402831 | 2403598 | 2418970 | 2419737 | 2497536 | 2498303 | 2659576 | 2660343 | 1209239 | 1210006 | 2560933 | 2561700 | 2463319 | 2464086 | 320268 | 321035 | 2555681        | 2556448        |
| 3033 BPSL2854 | 50 | 2508573 | 2509544 | 2401860 | 2402831 | 2417999 | 2418970 | 2496565 | 2497536 | 2658605 | 2659576 | 1208268 | 1209239 | 2559962 | 2560933 | 2462348 | 2463319 | 319297 | 320268 | 2554710        | 2555681        |
| 3034 BPSL2855 | 50 | 2507359 | 2508573 | 2400646 | 2401860 | 2416785 | 2417999 | 2495351 | 2496565 | 2657391 | 2658605 | 1207054 | 1208268 | 2558748 | 2559962 | 2461134 | 2462348 | 318083 | 319297 | 2553496        | 2554710        |
| 3035 BPSL2856 | 50 | 2506730 | 2507353 | 2400017 | 2400640 | 2416156 | 2416779 | 2494722 | 2495345 | 2656762 | 2657385 | 1206425 | 1207048 | 2558119 | 2558742 | 2460505 | 2461128 | 317454 | 318077 | 2552867        | 2553490        |
| 3036 BPSL2857 | 50 | 2506185 | 2506730 | 2399472 | 2400017 | 2415611 | 2416156 | 2494177 | 2494722 | 2656217 | 2656762 | 1205880 | 1206425 | 2557574 | 2558119 | 2459960 | 2460505 | 316909 | 317454 | 2552322        | 2552867        |
| 3037 BPSL2858 | 50 | 2506052 | 2505237 | 2399339 | 2398524 | 2415478 | 2414663 | 2494044 | 2493229 | 2656084 | 2655269 | 1205747 | 1204932 | 2557441 | 2556626 | 2459827 | 2459012 | 316776 | 315961 | 2551889        | 2551374        |
| 3038 BPSL2859 | 50 | 2505244 | 2504432 | 2398531 | 2397719 | 2414670 | 2413858 | 2493236 | 2492424 | 2655276 | 2654464 | 1204939 | 1204127 | 2556633 | 2555821 | 2459019 | 2458207 | 315968 | 315156 | 2551381        | 2551169        |
| 3039 BPSL2860 | 50 | 2504432 | 2503881 | 2397719 | 2397168 | 2413858 | 2413307 | 2492424 | 2491873 | 2654464 | 2653913 | 1204127 | 1203576 | 2555821 | 2555270 | 2458207 | 2457656 | 315156 | 314605 | 2550652        | 2550101        |
| 3040 BPSL2861 | 50 | 2502546 | 2503493 | 2395833 | 2396780 | 2411972 | 2412919 | 2490538 | 2491485 | 2652573 | 2653520 | 1202241 | 1203188 | 2553935 | 2554882 | 2456321 | 2457268 | 313265 | 314212 | 2548751        | 2549689        |
| 3041 BPSL2862 | 50 | 2501688 | 2502218 | 2394975 | 2395505 | 2411114 | 2411644 | 2489680 | 2490210 | 2651706 | 2652236 | 1201374 | 1201904 | 2553068 | 2553598 | 2455454 | 2455984 | 312380 | 312910 | 2547875        | 2548405        |
| 3042 BPSL2863 | 50 | 2500898 | 2501383 | 2394185 | 2394670 | 2410324 | 2410809 | 2488890 | 2489375 | 2650914 | 2651327 | 1200575 | 1201060 | 2552269 | 2552754 | 2454655 | 2455140 | 311581 | 312066 | 2547076        | 2547561        |

|               |                    |         |         |         |         |         |         |         |         |         |         |         |         |         |         |         |         |        |        |         |         |
|---------------|--------------------|---------|---------|---------|---------|---------|---------|---------|---------|---------|---------|---------|---------|---------|---------|---------|---------|--------|--------|---------|---------|
| 3047 BPSL2868 | 50                 | 2493797 | 2492718 | 2386693 | 2385614 | 2402553 | 2401474 | 2481789 | 2480710 | 2643813 | 2642734 | 1193474 | 1192395 | 2545168 | 2544089 | 2447671 | 2446592 | 304480 | 303401 | 2540400 | 2539321 |
| 3048 BPSL2869 | 50                 | 2492454 | 2491264 | 2385350 | 2384160 | 2401210 | 2400020 | 2480446 | 2479256 | 2642486 | 2641296 | 1192147 | 1190957 | 2543841 | 2542651 | 2446336 | 2445146 | 303137 | 301947 | 2539041 | 2537851 |
| 3049 BPSL2870 | 50                 | 2490876 | 2490553 | 2383772 | 2383449 | 2399632 | 2399309 | 2478868 | 2478545 | 2640908 | 2640585 | 1190569 | 1190246 | 2542263 | 2541940 | 2444758 | 2444435 | 301559 | 301236 | 2537463 | 2537140 |
| 3050 BPSL2871 | 50                 | 2490442 | 2488418 | 2383338 | 2381314 | 2399198 | 2397174 | 2478434 | 2476410 | 2640474 | 2638450 | 1190135 | 1188111 | 2541829 | 2539805 | 2444324 | 2442300 | 301125 | 299101 | 2537029 | 2535005 |
| 3051 BPSL2872 | 50                 | 2488399 | 2487461 | 2381295 | 2380357 | 2397155 | 2396217 | 2476391 | 2475453 | 2638431 | 2637493 | 1188092 | 1187154 | 2539786 | 2538848 | 2442281 | 2441343 | 299082 | 298144 | 2534986 | 2534048 |
| 3052 BPSL2873 | 50                 | 2486590 | 2487210 | 2379486 | 2380106 | 2395346 | 2395966 | 2474582 | 2475202 | 2636622 | 2637242 | 1186283 | 1186903 | 2537977 | 2538597 | 2440472 | 2441092 | 297273 | 297893 | 2533177 | 2533797 |
| 3053 BPSL2874 | 50                 | 2485911 | 2486486 | 2378807 | 2379382 | 2394667 | 2395242 | 2473903 | 2474478 | 2635943 | 2636518 | 1185604 | 1186179 | 2537298 | 2537873 | 2439793 | 2440368 | 296594 | 297169 | 2532498 | 2533073 |
| 3054 BPSL2875 | 50                 | 2485284 | 2485841 | 2378180 | 2378737 | 2394040 | 2394597 | 2473276 | 2473833 | 2635316 | 2635873 | 1184977 | 1185534 | 2536671 | 2537228 | 2439166 | 2439723 | 295967 | 296524 | 2531871 | 2532428 |
| 3055 BPSL2876 | 50                 | 2484709 | 2485269 | 2377605 | 2378165 | 2393465 | 2394025 | 2472701 | 2473261 | 2634741 | 2635301 | 1184402 | 1184962 | 2536096 | 2536656 | 2438591 | 2439151 | 295392 | 295952 | 2531296 | 2531856 |
| 3056 BPSL2877 | 50                 | 2484444 | 2483791 | 2377340 | 2376687 | 2393200 | 2392547 | 2472436 | 2471783 | 2634476 | 2633823 | 1184137 | 1183484 | 2535831 | 2535178 | 2438326 | 2437673 | 295127 | 294474 | 2531031 | 2530378 |
| 3057 BPSL2878 | 50                 | 2483791 | 2483132 | 2376687 | 2376028 | 2392547 | 2391888 | 2471783 | 2471124 | 2633823 | 2633164 | 1183484 | 1182825 | 2535178 | 2534519 | 2437673 | 2437014 | 294474 | 293815 | 2530378 | 2529719 |
| 3058 BPSL2879 | 50                 | 2483142 | 2481484 | 2376038 | 2374380 | 2391898 | 2390240 | 2471134 | 2469476 | 2633174 | 2631516 | 1182835 | 1181177 | 2534529 | 2532871 | 2437024 | 2435366 | 293825 | 292167 | 2529729 | 2528071 |
| 3059 BPSL2880 | 50                 | 2481484 | 2480717 | 2374380 | 2373613 | 2390240 | 2389473 | 2469476 | 2468709 | 2631516 | 2630749 | 1181177 | 1180410 | 2532871 | 2532104 | 2435366 | 2434599 | 292167 | 291400 | 2528071 | 2527304 |
| 3060 BPSL2881 | 50                 | 2479936 | 2479724 | 2372832 | 2372620 | 2388154 | 2387942 | 2467928 | 2467716 | 2629968 | 2627854 | 1179629 | 1177515 | 2531323 | 2529209 | 2433818 | 2431704 | 290610 | 288496 | 2526514 | 2524400 |
| 3061 BPSL2882 | 50                 | 2477651 | 2476362 | 2370547 | 2369258 | 2385869 | 2384580 | 2465643 | 2464354 | 2627666 | 2626377 | 1177327 | 1176038 | 2529021 | 2527732 | 2431516 | 2430227 | 288308 | 287019 | 2524212 | 2522923 |
| 3062 BPSL2883 | 50                 | 2475036 | 2474629 | 2367897 | 2367490 | 2383254 | 2382847 | 2463035 | 2462628 | 2625163 | 2624756 | 1174810 | 1174403 | 2526518 | 2526111 | 2428908 | 2428501 | 285602 | 285195 | 2521499 | 2521092 |
| 3063 BPSL2884 | 50                 | 2474177 | 2473494 | 2367038 | 2366355 | 2382395 | 2381712 | 2462176 | 2461493 | 2624304 | 2623621 | 1173969 | 1173286 | 2525677 | 2524994 | 2428061 | 2427378 | 284629 | 283946 | 2520592 | 2519909 |
| 3064 BPSL2885 | 50                 | 2471622 | 2473073 | 2364483 | 2365934 | 2379840 | 2381291 | 2459621 | 2461072 | 2621770 | 2623221 | 1171449 | 1172900 | 2523164 | 2524615 | 2425541 | 2426992 | 282074 | 283525 | 2518044 | 2519495 |
| 3065 BPSL2886 | 50                 | 2471296 | 2471622 | 2364157 | 2364483 | 2379514 | 2379840 | 2459295 | 2459621 | 2621444 | 2621770 | 1171123 | 1171449 | 2522838 | 2523164 | 2425254 | 2425541 | 281748 | 282074 | 2517718 | 2518044 |
| 3066 BPSL2887 | 50                 | 2470144 | 2471280 | 2363005 | 2364141 | 2378362 | 2379498 | 2458143 | 2459279 | 2620292 | 2621428 | 1169971 | 1171107 | 2521686 | 2522822 | 2424063 | 2425199 | 280596 | 281732 | 2516566 | 2517702 |
| 3067 BPSL2888 | 50                 | 2469900 | 2469394 | 2362761 | 2362255 | 2378118 | 2377612 | 2457899 | 2457393 | 2620048 | 2619542 | 1169727 | 1169221 | 2521442 | 2520936 | 2423819 | 2423313 | 280352 | 279846 | 2516322 | 2515816 |
| 3068 BPSL2889 | 50                 | 2469394 | 2468246 | 2362255 | 2361107 | 2377612 | 2376464 | 2457393 | 2456245 | 2619542 | 2618394 | 1169221 | 1168073 | 2520936 | 2519788 | 2423313 | 2422165 | 279846 | 278698 | 2515816 | 2514668 |
| 3069 BPSL2890 | 50                 | 2468186 | 2466582 | 2361047 | 2359443 | 2376404 | 2374800 | 2456185 | 2454581 | 2618334 | 2616730 | 1168013 | 1166409 | 2519728 | 2518124 | 2422105 | 2420501 | 278638 | 277034 | 2514608 | 2513004 |
| 3070          | Chr1_140_ISBma2_B  | 2464767 | 2466339 | 2357628 | 2359200 | 2372985 | 2374557 | 2452766 | 2454338 | 2614915 | 2616487 | 1163917 | 1164522 | 2517242 | 2517847 | 2419619 | 2420224 | 276152 | 276757 | 2512122 | 2512727 |
| 3071 BPSL2891 | 50                 | 2464109 | 2464714 | 2356970 | 2357575 | 2372327 | 2372932 | 2452108 | 2452713 | 2614257 | 2614862 | 1163917 | 1164522 | 2517242 | 2517847 | 2419619 | 2420224 | 276152 | 276757 | 2512122 | 2512727 |
| 3072 BPSL2892 | 50                 | 2463645 | 2462239 | 2356506 | 2355100 | 2371863 | 2370457 | 2451644 | 2450238 | 2613793 | 2612387 | 1163440 | 1162034 | 2516765 | 2515359 | 2419142 | 2417736 | 275688 | 274282 | 2511658 | 2511025 |
| 3073 BPSL2893 | 50                 | 2462191 | 2461001 | 2355052 | 2353862 | 2370409 | 2369219 | 2450190 | 2449000 | 2612339 | 2611149 | 1161986 | 1160796 | 2515311 | 2514121 | 2417688 | 2416498 | 274234 | 273044 | 2510204 | 2509014 |
| 3074 BPSL2894 | 50                 | 2460790 | 2459729 | 2353651 | 2352590 | 2369008 | 2367947 | 2448789 | 2447728 | 2610938 | 2609877 | 1160585 | 1159524 | 2513910 | 2512849 | 2416287 | 2415226 | 272833 | 271772 | 2508803 | 2507742 |
| 3075 BPSL2895 | 50                 | 2459729 | 2459499 | 2352590 | 2352360 | 2367947 | 2367717 | 2447728 | 2447498 | 2609877 | 2609647 | 1159524 | 1159294 | 2512849 | 2512619 | 2415226 | 2414996 | 271772 | 271542 | 2507742 | 2507512 |
| 3076 BPSL2896 | 50                 | 2459451 | 2457889 | 2352312 | 2350750 | 2367669 | 2366107 | 2447450 | 2445888 | 2609599 | 2608037 | 1159246 | 1157684 | 2512571 | 2511009 | 2414948 | 2413386 | 271494 | 269932 | 2507464 | 2505902 |
| 3077 BPSL2897 | 50                 | 2457519 | 2456980 | 2350380 | 2349841 | 2365737 | 2365198 | 2445518 | 2444979 | 2607667 | 2607128 | 1157314 | 1156775 | 2510639 | 2510100 | 2413016 | 2412477 | 269562 | 269023 | 2505532 | 2504993 |
| 3078 BPSL2898 | 50                 | 2456903 | 2456325 | 2349764 | 2349186 | 2365121 | 2364543 | 2444902 | 2444324 | 2607051 | 2606473 | 1156698 | 1156120 | 2510023 | 2509445 | 2412400 | 2411822 | 268946 | 268368 | 2504916 | 2504338 |
| 3079 BPSL2899 | 50                 | 2456154 | 2455087 | 2349015 | 2347948 | 2364372 | 2363305 | 2444153 | 2443086 | 2606302 | 2605235 | 1155949 | 1154882 | 2509274 | 2508207 | 2411651 | 2410584 | 268197 | 267130 | 2504167 | 2503100 |
| 3080 BPSL2900 | 50                 | 2455058 | 2454105 | 2347919 | 2346966 | 2363276 | 2362323 | 2443057 | 2442104 | 2605206 | 2604253 | 1154853 | 1153900 | 2508178 | 2507225 | 2410555 | 2409602 | 267101 | 266148 | 2503071 | 2502118 |
| 3081 BPSL2901 | 50                 | 2453970 | 2452831 | 2346831 | 2345692 | 2362188 | 2361049 | 2441969 | 2440830 | 2604118 | 2602979 | 1153765 | 1152626 | 2507090 | 2505951 | 2409467 | 2408328 | 266013 | 264874 | 2501983 | 2500844 |
| 3082 BPSL2902 | 50                 | 2451983 | 2452669 | 2344844 | 2345530 | 2360201 | 2360887 | 2439982 | 2440668 | 2602131 | 2602817 | 1151778 | 1152464 | 2505103 | 2505789 | 2407480 | 2408166 | 264026 | 264712 | 2499996 | 2500682 |
| 3083 BPSL2903 | 50                 | 2451496 | 2451972 | 2344357 | 2344833 | 2359714 | 2360190 | 2439495 | 2439971 | 2601644 | 2602120 | 1151291 | 1151767 | 2504616 | 2505092 | 2406993 | 2407469 | 263539 | 264015 | 2499509 | 2499985 |
| 3084 BPSL2904 | 50                 | 2450184 | 2451422 | 2343405 | 2344283 | 2358402 | 2359640 | 2438183 | 2439421 | 2600332 | 2601570 | 1149979 | 1151217 | 2503304 | 2504542 | 2405681 | 2406919 | 262227 | 263465 | 2498197 | 2499435 |
| 3085 BPSL2905 | 50                 | 2450053 | 2448845 | 2342914 | 2341706 | 2358271 | 2357063 | 2438052 | 2436844 | 2600201 | 2598993 | 1149848 | 1148640 | 2503173 | 2501965 | 2405550 | 2404342 | 262096 | 260888 | 2498066 | 2496858 |
| 3086 BPSL2906 | 50                 | 2448033 | 2448728 | 2340894 | 2341589 | 2356251 | 2356946 | 2436032 | 2436727 | 2598181 | 2598876 | 1147828 | 1148523 | 2501153 | 2501848 | 2403530 | 2404225 | 260076 | 260771 | 2496046 | 2496741 |
| 3087 BPSL2907 | 50                 | 2447324 | 2448025 | 2340185 | 2340886 | 2355542 | 2356243 | 2435323 | 2436024 | 2597472 | 2598173 | 1147119 | 1147820 | 2500444 | 2501145 | 2402821 | 2403522 | 259367 | 260068 | 2495337 | 2496038 |
| 3088 BPSL2908 | 50                 | 2447231 | 2446332 | 2340092 | 2339193 | 2355449 | 2354550 | 2435230 | 2434331 | 2597379 | 2596480 | 1147026 | 1146127 | 2500351 | 2499452 | 2402728 | 2401829 | 259274 | 258075 | 2495244 | 2494345 |
| 3089 BPSL2909 | 50                 | 2445793 | 2446158 | 2338654 | 2339019 | 2354011 | 2354376 | 2433792 | 2434157 | 2595941 | 2596306 | 1145588 | 1145953 | 2498913 | 2499278 | 2401290 | 2401655 | 257836 | 258201 | 2493806 | 2494171 |
| 3090 BPSL2910 | 50                 | 2445194 | 2445583 | 2338055 | 2338444 | 2353412 | 2353801 | 2433193 | 2433582 | 2595342 | 2595731 | 1144989 | 1145378 | 2498314 | 2498703 | 2400691 | 2401080 | 257237 | 257626 | 2493207 | 2493596 |
| 3091 BPSL2911 | 50                 | 2444754 | 2445179 | 2337615 | 2338040 | 2352972 | 2353397 | 2432753 | 2433178 | 2594902 | 2595327 | 1144549 | 1144974 | 2497874 | 2498299 | 2400251 | 2400676 | 256797 | 257222 | 2492767 | 2493192 |
| 3092          | Chr1_141a_ISBma2_A | 2442898 | 2444470 | 2335759 | 2337331 | 2351116 | 2352688 | 2430897 | 2432469 | 2593046 | 2594618 | 1142674 | 1144265 | 2496018 | 2497590 | 2398395 | 2399967 | 254941 | 256513 | 2490911 | 2492483 |
| 3093          | Chr1_141b_ISBma2_A | 2525029 | 2526601 | 2418316 | 2419888 | 2434455 | 2436027 | 25      |         |         |         |         |         |         |         |         |         |        |        |         |         |

|               |                    |         |         |         |         |         |         |         |         |         |         |         |         |         |         |        |        |         |         |
|---------------|--------------------|---------|---------|---------|---------|---------|---------|---------|---------|---------|---------|---------|---------|---------|---------|--------|--------|---------|---------|
| 3098 BPSL2916 | 51a                | 2532244 | 2531909 | 2425531 | 2425196 | 2441670 | 2441335 | 2520271 | 2519936 | 2682280 | 2681945 | 1231958 | 1231623 | 2583635 | 2583300 | 342968 | 342633 | 2578381 | 2578046 |
| 3099 BPSL2917 | 51a                | 2533049 | 2532633 | 2426336 | 2425920 | 2442475 | 2442059 | 2521076 | 2520660 | 2683105 | 2682689 | 1232763 | 1232347 | 2584440 | 2584024 | 343773 | 343357 | 2579186 | 2578770 |
| 3100 BPSL2918 | 51a                | 2533555 | 2533118 | 2426842 | 2426405 | 2442981 | 2442544 | 2521582 | 2521145 | 2683611 | 2683174 | 1233269 | 1232832 | 2584946 | 2584509 | 344279 | 343842 | 2579692 | 2579255 |
| 3101 BPSL2919 | 51a                | 2534018 | 2534332 | 2427305 | 2427619 | 2443444 | 2443758 | 2522045 | 2522359 | 2684074 | 2684388 | 1233732 | 1234046 | 2585409 | 2585723 | 344742 | 345056 | 2580155 | 2580469 |
| 3102 BPSL2920 | 51a                | 2534630 | 2534881 | 2427917 | 2428168 | 2444056 | 2444307 | 2522657 | 2522908 | 2684686 | 2684937 | 1234344 | 1234595 | 2586021 | 2586272 | 345354 | 345605 | 2580767 | 2581018 |
| 3103 BPSL2921 | 51a                | 2535719 | 2534997 | 2429006 | 2428284 | 2445145 | 2444423 | 2523746 | 2523024 | 2685775 | 2685053 | 1235433 | 1234711 | 2587110 | 2586388 | 346443 | 345721 | 2581856 | 2581134 |
| 3104 BPSL2922 | 51a                | 2536393 | 2535719 | 2429680 | 2429006 | 2445819 | 2445145 | 2524420 | 2523746 | 2686449 | 2685775 | 1236107 | 1235433 | 2587784 | 2587110 | 347117 | 346443 | 2582530 | 2581856 |
| 3105 BPSL2923 | 51a                | 2537133 | 2536396 | 2430420 | 2429683 | 2446559 | 2445822 | 2525160 | 2524423 | 2687189 | 2686452 | 1236847 | 1236110 | 2588524 | 2587787 | 347857 | 347120 | 2583270 | 2582533 |
| 3106          | Chr1_142_ISBma1_B  | 2538026 | 2539332 | 2431313 | 2432619 | 2447452 | 2448758 | 2526053 | 2527359 | 2688082 | 2689388 |         |         |         |         | 348750 | 350056 | 2584163 | 2585469 |
| 3107 BPSL2924 | 51a                | 2539433 | 2539332 | 2432720 | 2432619 | 2448859 | 2448758 | 2526052 | 2525246 | 2688081 | 2687275 | 1237832 | 1236933 | 2589509 | 2588610 | 350157 | 350056 | 2584162 | 2583356 |
| 3108 BPSL2925 | 51a                | 2540961 | 2539660 | 2434248 | 2432947 | 2450387 | 2449086 | 2528988 | 2527687 | 2691017 | 2689716 | 1239360 | 1238059 | 2591037 | 2589736 | 351685 | 350384 | 2587098 | 2585797 |
| 3109 BPSL2926 | 51a                | 2542292 | 2541345 | 2435579 | 2434632 | 2451718 | 2450771 | 2530319 | 2529372 | 2692348 | 2691401 | 1240691 | 1239744 | 2592368 | 2591421 | 353016 | 352069 | 2588429 | 2587482 |
| 3110 BPSL2927 | 51a                | 2542710 | 2544161 | 2435997 | 2437448 | 2452136 | 2453587 | 2530737 | 2532188 | 2692766 | 2694217 | 1241109 | 1242560 | 2592786 | 2594237 | 353434 | 354885 | 2588847 | 2590298 |
| 3111 BPSL2928 | 51a                | 2544209 | 2545657 | 2437496 | 2438944 | 2453635 | 2455083 | 2532236 | 2533684 | 2694265 | 2695713 | 1242608 | 1244056 | 2594285 | 2595733 | 354933 | 356381 | 2590346 | 2591794 |
| 3112 BPSL2929 | 51a                | 2546272 | 2545757 | 2439559 | 2439044 | 2455698 | 2455183 | 2534299 | 2533784 | 2696328 | 2695813 | 1244671 | 1244156 | 2596348 | 2595833 | 356996 | 356481 | 2592409 | 2591894 |
| 3113 BPSL2930 | 51a                | 2547647 | 2546289 | 2440934 | 2439576 | 2457073 | 2455715 | 2535674 | 2534316 | 2697703 | 2696345 | 1246046 | 1244688 | 2597723 | 2596365 | 358371 | 357013 | 2593784 | 2592426 |
| 3114 BPSL2931 | 51a                | 2548496 | 2547870 | 2441783 | 2441157 | 2457922 | 2457296 | 2536523 | 2535897 | 2698552 | 2697926 | 1246895 | 1246269 | 2598572 | 2597946 | 359220 | 358594 | 2594633 | 2594007 |
| 3115 BPSL2932 | 51a                | 2550368 | 2548518 | 2443655 | 2441805 | 2459794 | 2457944 | 2538395 | 2536545 | 2700424 | 2698574 | 1248767 | 1246917 | 2600444 | 2598594 | 361092 | 359242 | 2596505 | 2594655 |
| 3116 BPSL2933 | 51a                | 2550666 | 2551661 | 2443953 | 2444948 | 2460092 | 2461087 | 2538693 | 2539688 | 2700722 | 2701717 | 1249065 | 1250060 | 2600742 | 2601737 | 361390 | 362385 | 2596803 | 2597798 |
| 3117 BPSL2934 | 51a                | 2552534 | 2552115 | 2445821 | 2445402 | 2461960 | 2461541 | 2540561 | 2540142 | 2702590 | 2702171 | 1250933 | 1250514 | 2602610 | 2602191 | 363264 | 362845 | 2598677 | 2598258 |
| 3118 BPSL2935 | 51a                | 2553928 | 2552555 | 2447215 | 2445842 | 2463354 | 2461981 | 2541955 | 2540582 | 2703984 | 2702611 | 1252327 | 1250954 | 2604004 | 2602631 | 364658 | 363285 | 2600071 | 2598698 |
| 3119 BPSL2936 | 51a                | 2555048 | 2553963 | 2448335 | 2447250 | 2464474 | 2463389 | 2543075 | 2541990 | 2705104 | 2704019 | 1253447 | 1252362 | 2605124 | 2604039 | 365778 | 364693 | 2601191 | 2600106 |
| 3120 BPSL2937 | 51a                | 2555645 | 2555097 | 2448933 | 2448384 | 2465071 | 2464523 | 2543672 | 2543124 | 2705701 | 2705153 | 1254044 | 1253496 | 2605721 | 2605173 | 366375 | 365828 | 2601788 | 2601240 |
| 3121 BPSL2938 | 51a                | 2558281 | 2555690 | 2451568 | 2448977 | 2467707 | 2465116 | 2546308 | 2543717 | 2708337 | 2705746 | 1256680 | 1254089 | 2608357 | 2605766 | 369011 | 366420 | 2604424 | 2601833 |
| 3122 BPSL2939 | 51a                | 2558986 | 2558459 | 2452273 | 2451746 | 2468412 | 2467885 | 2547013 | 2546486 | 2709042 | 2708515 | 1257385 | 1256858 | 2609062 | 2608535 | 369716 | 369189 | 2605129 | 2604602 |
| 3123 BPSL2940 | 51a                | 2559734 | 2559030 | 2453021 | 2452317 | 2469160 | 2468456 | 2547761 | 2547057 | 2709790 | 2709086 | 1258133 | 1257429 | 2609810 | 2609106 | 370464 | 369760 | 2605877 | 2605173 |
| 3124 BPSL2941 | 51a                | 2560569 | 2559766 | 2453856 | 2453053 | 2469995 | 2469192 | 2548596 | 2547793 | 2710625 | 2709822 | 1258968 | 1258165 | 2610645 | 2609842 | 371299 | 370496 | 2606712 | 2605909 |
| 3125 BPSL2942 | 51a                | 2561470 | 2560643 | 2454947 | 2454432 | 2471595 | 2471128 | 2549497 | 2548670 | 2711526 | 2710699 | 1259869 | 1259042 | 2611546 | 2610719 |        |        |         |         |
| 3126 BPSL2943 | 51a                | 2561585 | 2562010 | 2455062 | 2455487 | 2471710 | 2472135 | 2549612 | 2550037 | 2711641 | 2712066 | 1259984 | 1260409 | 2611661 | 2612086 | 372204 | 372629 | 2607617 | 2608042 |
| 3127 BPSL2944 | 51a                | 2562533 | 2562153 | 2456010 | 2455630 | 2472658 | 2472278 | 2550560 | 2550180 | 2712589 | 2712209 | 1260932 | 1260552 | 2612609 | 2612229 | 373152 | 372772 | 2608565 | 2608185 |
| 3128 BPSL2945 | 51a                | 2563694 | 2562687 | 2457171 | 2456164 | 2473819 | 2472812 | 2551721 | 2550714 | 2713750 | 2712743 | 1262093 | 1261086 | 2613770 | 2612763 | 374313 | 373306 | 2609726 | 2608719 |
| 3129          | Chr1_143a_IS407A_B |         |         |         |         |         |         |         |         |         |         | 1262978 | 1264213 | 2614655 | 2615890 |        |        |         |         |
| 3130          | Chr1_143b_IS407A_B |         |         |         |         |         |         |         |         |         |         |         |         | 3290037 | 3291272 |        |        |         |         |
| 3131 BPSL2946 | 51b                | 2565154 | 2563835 | 2458631 | 2457312 | 2475279 | 2473960 | 2553181 | 2551862 | 2715210 | 2713891 | 1264793 | 1264200 | 3289457 | 3290050 | 375773 | 374454 | 2611186 | 2609867 |
| 3132 BPSL2947 | 51b                | 2565400 | 2566086 | 2458877 | 2459563 | 2475525 | 2476211 | 2553427 | 2554113 | 2715456 | 2716142 | 1265039 | 1265725 | 3289211 | 3288525 | 376019 | 376705 | 2611432 | 2612118 |
| 3133 BPSL2948 | 51b                | 2567661 | 2566729 | 2461138 | 2460206 | 2477786 | 2476854 | 2555681 | 2554749 | 2717696 | 2716764 | 1267293 | 1266361 | 3286957 | 3287889 | 378385 | 377453 | 2613728 | 2612796 |
| 3134 BPSL2949 | 51b                | 2567776 | 2568432 | 2461253 | 2461909 | 2477901 | 2478557 | 2555796 | 2556452 | 2717811 | 2718467 | 1267408 | 1268064 | 3286842 | 3286186 | 378500 | 379156 | 2613843 | 2614499 |
| 3135 BPSL2950 | 51b                | 2568522 | 2568989 | 2461999 | 2462466 | 2478647 | 2479114 | 2556542 | 2557009 | 2718557 | 2719024 | 1268154 | 1268621 | 3286096 | 3285629 | 379246 | 379713 | 2614589 | 2615056 |
| 3136 BPSL2951 | 51b                | 2569173 | 2570369 | 2462650 | 2463846 | 2479298 | 2480494 | 2557193 | 2558389 | 2719208 | 2720404 | 1268805 | 1270001 | 3285445 | 3284249 | 379897 | 381093 | 2615240 | 2616436 |
| 3137 BPSL2952 | 51b                | 2571791 | 2570784 | 2465268 | 2464261 | 2481916 | 2480909 | 2559811 | 2558804 | 2721826 | 2720819 | 1271423 | 1270416 | 3282827 | 3283834 | 382515 | 381508 | 2617858 | 2616851 |
| 3138 BPSL2953 | 51b                | 2573909 | 2571885 | 2467386 | 2465362 | 2484034 | 2482010 | 2561929 | 2559905 | 2723944 | 2721920 | 1273541 | 1271517 | 3280709 | 3282733 | 384633 | 382609 | 2619976 | 2617952 |
| 3139 BPSL2954 | 51b                | 2574172 | 2575026 | 2467649 | 2468503 | 2484297 | 2485151 | 2562192 | 2563046 | 2724207 | 2725061 | 1273804 | 1274658 | 3280446 | 3279592 | 384896 | 385750 | 2620239 | 2621093 |
| 3140 BPSL2955 | 51b                | 2575069 | 2575482 | 2468546 | 2468959 | 2485194 | 2485607 | 2563089 | 2563502 | 2725104 | 2725517 | 1274701 | 1275114 | 3279549 | 3279136 | 385793 | 386206 | 2621136 | 2621549 |
| 3141 BPSL2956 | 51b                | 2575509 | 2576246 | 2468986 | 2469723 | 2485634 | 2486371 | 2563529 | 2564266 | 2725544 | 2726281 | 1275141 | 1275878 | 3279109 | 3278372 | 386233 | 386970 | 2621576 | 2622313 |
| 3142 BPSL2957 | 51b                | 2577049 | 2576654 | 2470526 | 2470131 | 2487174 | 2486779 | 2565069 | 2564674 | 2727084 | 2726689 | 1276681 | 1276286 | 3277569 | 3277964 | 387773 | 387378 | 2623116 | 2622721 |
| 3143 BPSL2958 | 51b                | 2577662 | 2577234 | 2471139 | 2470711 | 2487787 | 2487359 | 2565682 | 2565254 | 2727697 | 2727269 | 1277294 | 1276866 | 3276956 | 3277384 | 388386 | 387958 | 2623729 | 2623301 |
| 3144 BPSL2959 | 51b                | 2580299 | 2577993 | 2473776 | 2471470 | 2490424 | 2488118 | 2568319 | 2566013 | 2730334 | 2728028 | 1279931 | 1277625 | 3274319 | 3276625 | 391023 | 388717 | 2626366 | 2624060 |
| 3145 BPSL2960 | 51b                | 2580501 | 2581499 | 2473978 | 2474976 | 2490626 | 2491624 | 2568521 | 2569519 | 2730536 | 2731534 | 1280133 | 1281131 | 3274117 | 3273119 | 391225 | 392223 | 2626568 | 2627566 |
| 3146 BPSL2961 | 51b                | 2581636 | 2582106 | 2475113 | 2475583 | 2491761 | 2492231 | 2569656 | 2570126 | 2731671 | 2732141 | 1281268 | 1281738 | 3272982 | 3272512 | 392360 | 392830 | 2627703 | 2628173 |
| 3147 BPSL2962 | 51b                | 2582153 | 2582650 | 2477630 | 2476127 | 2492278 | 2492775 | 2570173 | 2570670 | 2732188 | 2732685 | 1281785 | 1282282 | 3272465 | 3271968 | 392877 | 393274 | 2628220 | 2628717 |
| 3148 BPSL2963 | 51b                | 2583763 | 2582939 | 2477240 | 2476416 | 2493888 | 2493064 | 2571783 | 2570959 | 2733798 | 2732974 | 1283395 | 1282571 | 3270855 | 3271679 | 394487 | 393663 | 2629830 | 2629006 |



|                                       |                   |         |         |         |         |         |         |         |         |         |           |         |         |         |         |         |         |        |        |         |         |
|---------------------------------------|-------------------|---------|---------|---------|---------|---------|---------|---------|---------|---------|-----------|---------|---------|---------|---------|---------|---------|--------|--------|---------|---------|
| 3149 BPSL2964                         | 51b               | 2584843 | 2583863 | 2478320 | 2477340 | 2494968 | 2493988 | 2572863 | 2571883 | 2734878 | 2733898   | 1284475 | 1283495 | 3269775 | 3270755 |         |         | 395567 | 394587 | 2630910 | 2629930 |
| 3150 BPSL2965                         | 51b               | 2585786 | 2584983 | 2479263 | 2478460 | 2495911 | 2495108 | 2573806 | 2573003 | 2735821 | 2735018   | 1285418 | 1284615 | 3268832 | 3269635 |         |         | 396510 | 395707 | 2631853 | 2631050 |
| 3151 BPSL2966                         | 51b               | 2586829 | 2585828 | 2480306 | 2479305 | 2496954 | 2495953 | 2574849 | 2573848 | 2736864 | 2735863   | 1286461 | 1285460 | 3267789 | 3268790 |         |         | 397553 | 396552 | 2632896 | 2631895 |
| 3152 BPSL2967                         | 51b               | 2588476 | 2586947 | 2481953 | 2480424 | 2498601 | 2497072 | 2576496 | 2574967 | 2738511 | 2736982   | 1288108 | 1286579 | 3266142 | 3267671 |         |         | 399200 | 397671 | 2634543 | 2633014 |
| 3153 BPSL2968                         | 51b               | 2589539 | 2588547 | 2483016 | 2482024 | 2499664 | 2498672 | 2577559 | 2576567 | 2739574 | 2738582   | 1289171 | 1288179 | 3265079 | 3266071 |         |         | 400263 | 399271 | 2635606 | 2634614 |
| 3154 BPSL2969                         | 51b               | 2590448 | 2589672 | 2483925 | 2483149 | 2500573 | 2499797 | 2578468 | 2577692 | 2740483 | 2739707   | 1290080 | 1289304 | 3264170 | 3264946 |         |         | 401172 | 400396 | 2636515 | 2635739 |
| 3155 BPSL2970                         | 51b               | 2591074 | 2590448 | 2484551 | 2483925 | 2501199 | 2500573 | 2579094 | 2578468 | 2741109 | 2740483   | 1290706 | 1290080 | 3263544 | 3264170 |         |         | 401798 | 401172 | 2637141 | 2636515 |
| 3156 BPSL2971                         | 51b               | 2592185 | 2591175 | 2485662 | 2484652 | 2502310 | 2501300 | 2580205 | 2579195 | 2742220 | 2741210   | 1291817 | 1290807 | 3262433 | 3263443 |         |         | 402909 | 401899 | 2638252 | 2637242 |
| 3157 BPSL2972                         | 51b               | 2593099 | 2592185 | 2486576 | 2485662 | 2503224 | 2502310 | 2581119 | 2580205 | 2743134 | 2742220   | 1292731 | 1291817 | 3261519 | 3262433 |         |         | 403823 | 402909 | 2639166 | 2638252 |
| 3158 BPSL2973                         | 51b               | 2593795 | 2593367 | 2487272 | 2486844 | 2503920 | 2503492 | 2581815 | 2581387 | 2743830 | 2743402   | 1293427 | 1292999 | 3260823 | 3261251 |         |         | 404519 | 404091 | 2639862 | 2639434 |
| 3159 BPSL2974                         | 51b               | 2595490 | 2593859 | 2488962 | 2487336 | 2505615 | 2503984 | 2583510 | 2581879 | 2745525 | 2743894   | 1295122 | 1293491 | 3259128 | 3260759 |         |         | 406214 | 404583 | 2641557 | 2639926 |
| 3160 BPSL2975                         | 51b               | 2596720 | 2595953 | 2490197 | 2489430 | 2506845 | 2506078 | 2584740 | 2583973 | 2746755 | 2745988   | 1296352 | 1295585 | 3257898 | 3258665 |         |         | 407444 | 406677 | 2642787 | 2642020 |
| 3161 BPSL2976                         | 51b               | 2597619 | 2596744 | 2491096 | 2490221 | 2507744 | 2506869 | 2585639 | 2584764 | 2747654 | 2746779   | 1297251 | 1296376 | 3256999 | 3257874 |         |         | 408343 | 407468 | 2643686 | 2642811 |
| 3162 BPSL2977                         | 51b               | 2599694 | 2597619 | 2493171 | 2491096 | 2509819 | 2507744 | 2587714 | 2585639 | 2749729 | 2747654   | 1299326 | 1297251 | 3254924 | 3256999 |         |         | 410418 | 408343 | 2645761 | 2643686 |
| 3163 BPSL2978                         | 51b               | 2600387 | 2599821 | 2493864 | 2493298 | 2510512 | 2509946 | 2588407 | 2587841 | 2750422 | 2749856   | 1300019 | 1299453 | 3254231 | 3254797 |         |         | 411111 | 410545 | 2646454 | 2645888 |
| 3164 BPSL2979                         | 51b               | 2601868 | 2600387 | 2495345 | 2493864 | 2511993 | 2510512 | 2589888 | 2588407 | 2751903 | 2750422   | 1301500 | 1300019 | 3252750 | 3254231 |         |         | 412592 | 411111 | 2647935 | 2646454 |
| 3165 BPSL2980                         | 51b               | 2601990 | 2602643 | 2495467 | 2496120 | 2512115 | 2512768 | 2590010 | 2590663 | 2752025 | 2752678   | 1301622 | 1302275 | 3252628 | 3251975 |         |         | 412714 | 413367 | 2648057 | 2648710 |
| 3166 BPSL2981                         | 51b               | 2602717 | 2603196 | 2496194 | 2496673 | 2512842 | 2513321 | 2590737 | 2591216 | 2752752 | 2753231   | 1302349 | 1302828 | 3251901 | 3251422 |         |         | 413441 | 413920 | 2648784 | 2649263 |
| 3167 BPSL2982                         | 51b               | 2603395 | 2603844 | 2496872 | 2497321 | 2513520 | 2513969 | 2591415 | 2591864 | 2753430 | 2753879   | 1303027 | 1303476 | 3251223 | 3250774 |         |         | 414119 | 414568 | 2649462 | 2649911 |
| 3168 BPSL2983                         | 51b               | 2603915 | 2604385 | 2497392 | 2497862 | 2514040 | 2514510 | 2591935 | 2592405 | 2753950 | 2754420   | 1303547 | 1304017 | 3250703 | 3250233 |         |         | 414639 | 415109 | 2649982 | 2650452 |
| 3169 BPSL2984                         | 51b               | 2604473 | 2605837 | 2497950 | 2499314 | 2514598 | 2515962 | 2592493 | 2593857 | 2754508 | 2755872   | 1304105 | 1305469 | 3250145 | 3248781 |         |         | 415197 | 416561 | 2650540 | 2651904 |
| 3170 BPSL2985                         | 51b               | 2605843 | 2606742 | 2499320 | 2500219 | 2515968 | 2516867 | 2593863 | 2594762 | 2755878 | 2756777   | 1305475 | 1306374 | 3248775 | 3247876 |         |         | 416567 | 417466 | 2651910 | 2652809 |
| 3171 BPSL2986                         | 51b               | 2606793 | 2608217 | 2500270 | 2501694 | 2516918 | 2518342 | 2596237 | 2596237 | 2756828 | 2758252   | 1306425 | 1307849 | 3247825 | 3246401 |         |         | 417517 | 418941 | 2652860 | 2654284 |
| 3172 BPSL2987                         | 51b               | 2608288 | 2608788 | 2501765 | 2502265 | 2518413 | 2518913 | 2596308 | 2596808 | 2758323 | 2758823   | 1307920 | 1308420 | 3246330 | 3245830 |         |         | 419012 | 419512 | 2654355 | 2654855 |
| 3173 BPSL2988                         | 51b               | 2608892 | 2609827 | 2502369 | 2503304 | 2519017 | 2519952 | 2596912 | 2597847 | 2758927 | 2759862   | 1308524 | 1309459 | 3245726 | 3244791 |         |         | 419616 | 420551 | 2654959 | 2655894 |
| 3174 BPSL2989                         | 51b               | 2609854 | 2610324 | 2503331 | 2503801 | 2519979 | 2520449 | 2597874 | 2598344 | 2759889 | 2760359   | 1309486 | 1309956 | 3244764 | 3244294 |         |         | 420578 | 421048 | 2655921 | 2656391 |
| 3175 BPSL2990_Histone H1-like protein | 51b               |         |         |         |         |         |         |         |         |         |           |         |         |         |         |         |         |        |        |         |         |
| 3176 BPSL2991                         | 51b               | 2612511 | 2611462 | 2505988 | 2504939 | 2522636 | 2521587 | 2600531 | 2599482 | 2762591 | 2761542   | 1312173 | 1311124 | 3242077 | 3243126 |         |         | 423265 | 422216 | 2658608 | 2657559 |
| 3177 BPSL2992                         | 51b               | 2616025 | 2613041 | 2509502 | 2506518 | 2526150 | 2523166 | 2604045 | 2601061 | 2766105 | 2763121   | 1315687 | 1312703 | 3238563 | 3241547 |         |         | 426779 | 423795 | 2662122 | 2659138 |
| 3178 BPSL2993                         | 51b               | 2617086 | 2616499 | 2510563 | 2509976 | 2527211 | 2526624 | 2605106 | 2604519 | 2767166 | 2766579   | 1316748 | 1316161 | 3237502 | 3238089 |         |         | 427840 | 427253 | 2663183 | 2662596 |
| 3179 BPSL2993a                        | 51b               | 2617403 | 2617086 | 2510880 | 2510563 | 2527528 | 2527211 | 2605423 | 2605106 | 2767483 | 2767166   | 1317065 | 1316748 | 3237185 | 3237502 |         |         | 428157 | 427840 | 2663500 | 2663183 |
| 3180 BPSL2994                         | 51b               | 2618316 | 2617420 | 2511793 | 2510897 | 2528441 | 2527545 | 2606336 | 2605440 | 2768396 | 2767500   | 1317978 | 1317082 | 3236272 | 3237168 |         |         | 429070 | 428174 | 2664413 | 2663517 |
| 3181 BPSL2995                         | 51b               | 2618404 | 2619768 | 2511881 | 2513245 | 2528529 | 2529893 | 2606424 | 2607788 | 2768484 | 2769848   | 1318066 | 1319430 | 3236184 | 3234820 |         |         | 429158 | 430522 | 2664501 | 2665865 |
| 3182 BPSL2996                         | 51b               | 2619869 | 2620417 | 2513346 | 2513894 | 2529994 | 2530542 | 2607889 | 2608437 | 2769949 | 2770497   | 1319531 | 1320079 | 3234719 | 3234171 |         |         | 430623 | 431171 | 2665966 | 2666514 |
| 3183 BPSL2997                         | 51b               | 2621213 | 2620614 | 2514690 | 2514091 | 2531338 | 2530739 | 2609233 | 2608634 | 2771293 | 2770694   | 1320875 | 1320276 | 3233375 | 3233974 |         |         | 431967 | 431368 | 2667310 | 2666711 |
| 3184 BPSL2998                         | 51b               | 2622981 | 2621248 | 2516458 | 2514725 | 2533106 | 2531373 | 2611001 | 2609268 | 2773061 | 2771328   | 1322643 | 1320910 | 3231607 | 3233340 | 3148933 | 3150372 | 433735 | 432002 | 2669078 | 2667345 |
| 3185 BPSL2999                         | 51b               | 2623199 | 2623846 | 2516676 | 2517323 | 2533324 | 2533971 | 2611219 | 2611866 | 2773279 | 2773926   | 1322861 | 1323508 | 3231389 | 3230742 | 3148715 | 3148068 | 433953 | 434600 | 2669296 | 2669943 |
| 3186 BPSL3000                         | 51b               | 2623905 | 2624489 | 2517382 | 2517966 | 2534030 | 2534614 | 2611925 | 2612509 | 2773985 | 2774569   | 1323567 | 1324151 | 3230683 | 3230099 | 3148009 | 3147425 | 434659 | 435243 | 2670002 | 2670586 |
| 3187 BPSL3001_IsChr1_144_ISBma2_B     | 51b               |         |         |         |         |         |         |         |         |         |           | 1324314 | 1325889 | 3228362 | 3229936 | 3145687 | 3147259 |        |        |         |         |
| 3188 BPSL3002                         | 51b               | 2625819 | 2624704 | 2519296 | 2518181 | 2535944 | 2534829 | 2613839 | 2612724 | 2775899 | 2774784   | 1327075 | 1325960 | 3227176 | 3228291 | 3144501 | 3145616 | 436573 | 435458 | 2671916 | 2670801 |
| 3189 BPSL3003                         | 51b               | 2627022 | 2625907 | 2520499 | 2519384 | 2537147 | 2536032 | 2615042 | 2613927 | 2777102 | 2775987   | 1328278 | 1327163 | 3225973 | 3227088 | 3143298 | 3144413 | 437776 | 436661 | 2673119 | 2672004 |
| 3190 BPSL3004                         | 51b               | 2627470 | 2627210 | 2520947 | 2520687 | 2537595 | 2537335 | 2615490 | 2615230 | 2777550 | 2777290   | 1328726 | 1328466 | 3225525 | 3225785 | 3142850 | 3143110 | 438224 | 437964 | 2673567 | 2673307 |
| 3191 BPSL3005                         | 51b               | 2627810 | 2627502 | 2521287 | 2520979 | 2537935 | 2537627 | 2615830 | 2615522 | 2777890 | 2777582   | 1329066 | 1328758 | 3225185 | 3225493 | 3142510 | 3142818 | 438564 | 438256 | 2673907 | 2673599 |
| 3192 BPSL3006                         | 51b               | 2628026 | 2629021 | 2521503 | 2522498 | 2538151 | 2539146 | 2616046 | 2617041 | 2778106 | 2779101   | 1329282 | 1330277 | 3224969 | 3223974 | 3142294 | 3141299 | 438780 | 439775 | 2674123 | 2675118 |
| 3193                                  | Chr1_145_IS407A_A | 2630161 | 2631063 | 2523638 | 2524540 | 2540286 | 2541188 | 2618181 | 2619083 | 2780241 | 2781476   | 1331417 | 1332652 | 3221599 | 3222834 | 3139134 | 3140369 | 440915 | 442150 | 2676258 | 2677493 |
| 3194                                  | Chr1_146_IS407A_B | 2631064 | 2632299 | 2524541 | 2525776 | 2541189 | 2542424 | 2619084 | 2620319 |         |           |         |         |         |         |         |         |        |        |         |         |
| 3195 BPSL3007                         | 51b               | 2633929 | 2635221 | 2527406 | 2528698 | 2544054 | 2545346 | 2621949 | 2623241 | 2783106 | 2784398   | 1334282 | 1335574 | 3219969 | 3218677 | 3137504 | 3136212 | 443780 | 445072 | 2679123 | 2680415 |
| 3196 BPSL3008                         | 51b               | 2635324 | 2636580 | 2528801 | 2530057 | 2545449 | 2546705 | 2623344 | 2624600 | 2784501 | 2785757   | 1335677 | 1336933 | 3218574 | 3217318 | 3136109 | 3134853 | 445175 | 446431 | 2680518 | 2681774 |
| 3197 BPSL3009                         | 51b               | 2636580 | 2637794 | 2530057 | 2531271 | 2546705 | 2547919 | 2624600 | 2625814 | 2785757 | 2786971   | 1336933 | 1338147 | 3217318 | 3216104 | 3134853 | 3133639 | 446431 | 447465 | 2681774 | 2682988 |
| 3198 BPSL3010                         | 51b               | 2637827 | 2638753 | 2531304 | 2532230 | 2547952 | 2548878 | 2625847 | 2626773 | 2787004 | 2787930</ |         |         |         |         |         |         |        |        |         |         |







|      |                    |    |         |         |         |         |         |         |         |         |         |         |         |         |         |         |         |         |         |         |         |         |
|------|--------------------|----|---------|---------|---------|---------|---------|---------|---------|---------|---------|---------|---------|---------|---------|---------|---------|---------|---------|---------|---------|---------|
| 3353 | BPSL3163           | 53 | 2834259 | 2833180 | 2729628 | 2728549 | 2745731 | 2744652 | 2820760 | 2819681 | 2922329 | 2923408 | 1811265 | 1812344 | 2743233 | 2742154 | 2734239 | 2733160 | 3177311 | 3178390 | 2876166 | 2875087 |
| 3354 | BPSL3164           | 53 | 2835130 | 2834288 | 2730499 | 2729657 | 2746602 | 2745760 | 2821631 | 2820789 | 2921458 | 2922300 | 1810394 | 1811236 | 2744104 | 2743262 | 2735110 | 2734268 | 3176440 | 3177282 | 2877037 | 2876195 |
| 3355 | BPSL3165           | 53 | 2836011 | 2835130 | 2731380 | 2730499 | 2747483 | 2746602 | 2822512 | 2821631 | 2920577 | 2921458 | 1809513 | 1810394 | 2744985 | 2744104 | 2735991 | 2735110 | 3175559 | 3176440 | 2877918 | 2877037 |
| 3356 | BPSL3166           | 53 | 2837467 | 2836148 | 2732836 | 2731517 | 2748939 | 2747620 | 2823968 | 2822649 | 2919121 | 2920440 | 1808057 | 1809376 | 2746441 | 2745122 | 2737447 | 2736128 | 3174103 | 3175422 | 2879374 | 2878055 |
| 3357 | BPSL3167           | 53 | 2838784 | 2837555 | 2734153 | 2732924 | 2750256 | 2749027 | 2825285 | 2824056 | 2917804 | 2919033 | 1806740 | 1807969 | 2747758 | 2746529 | 2738764 | 2737535 | 3172786 | 3174015 | 2880691 | 2879462 |
| 3358 | BPSL3168           | 53 | 2839912 | 2838836 | 2735281 | 2734205 | 2751384 | 2750308 | 2826413 | 2825337 | 2916676 | 2917752 | 1805612 | 1806688 | 2748886 | 2747810 | 2739892 | 2738816 | 3171658 | 3172734 | 2881819 | 2880743 |
| 3359 | BPSL3169           | 53 | 2840463 | 2839912 | 2735832 | 2735281 | 2751935 | 2751384 | 2826964 | 2826413 | 2916125 | 2916676 | 1805061 | 1805612 | 2749437 | 2748886 | 2740443 | 2739892 | 3171107 | 3171658 | 2882370 | 2881819 |
| 3360 | BPSL3170           | 53 | 2841881 | 2840547 | 2737250 | 2735916 | 2753353 | 2752019 | 2828382 | 2827048 | 2914707 | 2916041 | 1803643 | 1804977 | 2750855 | 2749521 | 2741861 | 2740527 | 3169689 | 3171023 | 2883788 | 2882454 |
| 3361 | BPSL3171           | 53 | 2843227 | 2842271 | 2738596 | 2737640 | 2754699 | 2753743 | 2829728 | 2828772 | 2913361 | 2914317 | 1802297 | 1803253 | 2752201 | 2751245 | 2743207 | 2742251 | 3168343 | 3169299 | 2884546 | 2884178 |
| 3362 | BPSL3172           | 53 | 2843904 | 2843227 | 2739273 | 2738596 | 2755376 | 2754699 | 2830405 | 2829728 | 2912684 | 2913361 | 1801620 | 1802297 | 2752878 | 2752201 | 2743884 | 2743207 | 3167666 | 3168343 | 2885359 | 2884682 |
| 3363 | BPSL3173           | 53 | 2844839 | 2843904 | 2740208 | 2739273 | 2756311 | 2755376 | 2831340 | 2830405 | 2911740 | 2912684 | 1800676 | 1801620 | 2753822 | 2752878 | 2744828 | 2743884 | 3166722 | 3167666 | 2886329 | 2886102 |
| 3364 | BPSL3174           | 53 | 2845152 | 2847470 | 2740521 | 2742839 | 2756624 | 2758942 | 2831653 | 2833971 | 2911427 | 2909109 | 1800363 | 1798045 | 2754135 | 2756453 | 2745141 | 2746325 | 3166409 | 3164091 | 2886642 | 2888960 |
| 3365 | Chr1_151a_ISBma2_A |    | 2847519 | 2849091 | 2742888 | 2744460 | 2758991 | 2760563 | 2834020 | 2835592 | 2907488 | 2909060 | 1796424 | 1797996 | 2756502 | 2758049 | 2747570 | 2749142 | 3162470 | 3164042 | 2889009 | 2890581 |
| 3366 | Chr1_151b_ISBma2_A |    |         |         |         |         |         |         |         |         |         |         | 1930938 | 1932510 | 3401631 | 3401662 | 2565718 | 2567265 |         |         |         |         |
| 3367 | BPSL3175           | 54 | 2849510 | 2849187 | 2744879 | 2744556 | 2760982 | 2760659 | 2836011 | 2835688 | 2907069 | 2907392 | 1932929 | 1932606 | 3402081 | 3401758 | 2565249 | 2565572 | 3162051 | 3162374 | 2891000 | 2890677 |
| 3368 | BPSL3175A          | 54 | 2849547 | 2849828 | 2744916 | 2745197 | 2761019 | 2761300 | 2836048 | 2836329 | 2907032 | 2906751 | 1932966 | 1933247 | 3402118 | 3402399 | 2565212 | 2564928 | 3162014 | 3161733 | 2891037 | 2891318 |
| 3369 | BPSL3176           | 54 | 2849842 | 2851110 | 2745211 | 2746479 | 2761314 | 2762582 | 2836343 | 2837611 | 2906737 | 2905469 | 1933261 | 1934529 | 3402413 | 3403681 | 2564914 | 2563646 | 3161719 | 3160451 | 2891332 | 2892600 |
| 3370 | BPSL3177           | 54 | 2852085 | 2851375 | 2747454 | 2746744 | 2763557 | 2762847 | 2838586 | 2838776 | 2904500 | 2905210 | 1935504 | 1934794 | 3404656 | 3403946 | 2562671 | 2563381 | 3159476 | 3160186 | 2805629 | 2806339 |
| 3371 | BPSL3178           | 54 | 2853102 | 2852110 | 2748471 | 2747479 | 2764574 | 2763582 | 2839603 | 2838611 | 2903483 | 2904475 | 1936521 | 1935529 | 3405673 | 3404681 | 2561654 | 2562646 | 3158459 | 3159451 | 2804612 | 2805604 |
| 3372 | Chr1_152a_IS407A_A |    | 2853155 | 2854390 | 2748524 | 2749759 | 2764627 | 2765862 | 2839656 | 2840891 | 2902195 | 2903430 | 1936574 | 1937809 | 3405726 | 3406961 | 2560366 | 2561601 | 3157171 | 3158406 | 2803324 | 2804559 |
| 3373 | Chr1_152b_IS407A_A |    | 2705320 | 2706555 | 2598865 | 2600100 | 2615744 | 2616979 | 2692936 | 2694171 | 2855128 | 2856363 | 1984096 | 1985331 | 3453248 | 3454483 | 2512937 | 2514172 | 3109637 | 3110872 | 2756293 | 2757528 |
| 3374 | BPSL3179           | 55 | 2707875 | 2706688 | 2601420 | 2600233 | 2618299 | 2617112 | 2695491 | 2694304 | 2857683 | 2856496 | 1982776 | 1983963 | 3451928 | 3453115 | 2515492 | 2514305 | 3112192 | 3111005 | 2758848 | 2757661 |
| 3375 | BPSL3180           | 55 | 2709979 | 2707883 | 2603524 | 2601428 | 2620403 | 2618307 | 2697595 | 2695499 | 2859787 | 2857691 | 1980672 | 1982768 | 3449824 | 3451920 | 2517596 | 2515500 | 3114296 | 3112200 | 2760952 | 2758856 |
| 3376 | BPSL3181           | 55 | 2710835 | 2710191 | 2604380 | 2603736 | 2621259 | 2620615 | 2698451 | 2697807 | 2860643 | 2859999 | 1979816 | 1980460 | 3448968 | 3449612 | 2518452 | 2517808 | 3115152 | 3114508 | 2761808 | 2761164 |
| 3377 | BPSL3182           | 55 | 2711052 | 2711708 | 2604597 | 2605253 | 2621476 | 2622132 | 2698668 | 2699324 | 2860860 | 2861516 | 1979599 | 1978943 | 3448751 | 3448095 | 2518669 | 2519325 | 3115369 | 3116025 | 2762025 | 2762681 |
| 3378 | BPSL3183           | 55 | 2711929 | 2712990 | 2605474 | 2606535 | 2622353 | 2623414 | 2699545 | 2700606 | 2861737 | 2862798 | 1978722 | 1977661 | 3447874 | 3446813 | 2519546 | 2520607 | 3116246 | 3117307 | 2762902 | 2763963 |
| 3379 | BPSL3184           | 55 | 2715092 | 2713212 | 2608637 | 2606757 | 2625516 | 2623636 | 2702708 | 2700828 | 2864900 | 2863020 | 1975559 | 1977439 | 3444711 | 3446591 | 2522709 | 2520829 | 3119409 | 3117529 | 2766065 | 2764185 |
| 3380 | BPSL3185           | 55 | 2715435 | 2715088 | 2608980 | 2608633 | 2625859 | 2625512 | 2703051 | 2702704 | 2865243 | 2864896 | 1975216 | 1975563 | 3444368 | 3444715 | 2523052 | 2522705 | 3119752 | 3119405 | 2766408 | 2766061 |
| 3381 | BPSL3186           | 55 | 2715965 | 2715573 | 2609510 | 2609118 | 2626389 | 2625997 | 2703581 | 2703189 | 2865773 | 2865381 | 1974686 | 1975078 | 3443838 | 3444230 | 2523582 | 2523190 | 3120282 | 3119890 | 2766938 | 2766546 |
| 3382 | BPSL3187           | 55 | 2717083 | 2716109 | 2610628 | 2609654 | 2627507 | 2626533 | 2704699 | 2703725 | 2866891 | 2865917 | 1973568 | 1974542 | 3442720 | 3443694 | 2524700 | 2523726 | 3121400 | 3120426 | 2768056 | 2767082 |
| 3383 | BPSL3188           | 55 | 2717834 | 2717214 | 2611379 | 2610759 | 2628258 | 2627638 | 2705450 | 2704830 | 2867642 | 2867022 | 1972817 | 1973437 | 3441969 | 3442589 | 2525539 | 2525006 | 3122151 | 3121531 | 2768807 | 2768187 |
| 3384 | BPSL3189           | 55 | 2718386 | 2717988 | 2611931 | 2611533 | 2628810 | 2628412 | 2706002 | 2705604 | 2868194 | 2867796 | 1972265 | 1972663 | 3441417 | 3441815 | 2526091 | 2525693 | 3122703 | 3122305 | 2769359 | 2768961 |
| 3385 | BPSL3190           | 55 | 2718775 | 2718413 | 2612320 | 2611958 | 2629199 | 2628837 | 2706391 | 2706029 | 2868583 | 2868221 | 1971876 | 1972238 | 3441028 | 3441390 | 2526480 | 2526118 | 3123092 | 3122730 | 2769748 | 2769386 |
| 3386 | BPSL3191           | 55 | 2718930 | 2718817 | 2612475 | 2612362 | 2629354 | 2629241 | 2706546 | 2706433 | 2868738 | 2868625 | 1971721 | 1971834 | 3440873 | 3440986 | 2526635 | 2526522 | 3123247 | 3123134 | 2769903 | 2769790 |
| 3387 | BPSL3192           | 55 | 2719169 | 2718954 | 2612714 | 2612499 | 2629593 | 2629378 | 2706785 | 2706570 | 2868977 | 2868762 | 1971482 | 1971697 | 3440634 | 3440849 | 2526874 | 2526659 | 3123486 | 3123271 | 2770142 | 2769927 |
| 3388 | BPSL3193           | 55 | 2720543 | 2719182 | 2614088 | 2612727 | 2630967 | 2629606 | 2708159 | 2706798 | 2870351 | 2868990 | 1970108 | 1971469 | 3439260 | 3440621 | 2528248 | 2526887 | 3124860 | 3123499 | 2771516 | 2770155 |
| 3389 | BPSL3194           | 55 | 2721004 | 2720573 | 2614549 | 2614118 | 2631428 | 2630997 | 2708620 | 2708189 | 2870812 | 2870381 | 1969647 | 1970078 | 3438799 | 3439230 | 2528709 | 2528278 | 3125321 | 3124890 | 2771977 | 2771546 |
| 3390 | BPSL3195           | 55 | 2721215 | 2721036 | 2614760 | 2614581 | 2631639 | 2631460 | 2708831 | 2708652 | 2871023 | 2870844 | 1969436 | 1969615 | 3438588 | 3438767 | 2528920 | 2528741 | 3125532 | 3125353 | 2772188 | 2772009 |
| 3391 | BPSL3196           | 55 | 2721749 | 2721234 | 2615294 | 2614779 | 2632173 | 2631658 | 2709365 | 2708850 | 2871557 | 2871042 | 1968902 | 1969417 | 3438054 | 3438569 | 2529454 | 2528939 | 3126066 | 3125551 | 2772722 | 2772207 |
| 3392 | BPSL3197           | 55 | 2722128 | 2721766 | 2615673 | 2615311 | 2632552 | 2632190 | 2709744 | 2709382 | 2871936 | 2871574 | 1968523 | 1968885 | 3437675 | 3438037 | 2529833 | 2529471 | 3126445 | 3126083 | 2773101 | 2772739 |
| 3393 | BPSL3198           | 55 | 2722671 | 2722144 | 2616216 | 2615689 | 2633095 | 2632568 | 2710287 | 2709760 | 2872479 | 2871952 | 1967980 | 1968507 | 3437132 | 3437659 | 2530376 | 2529849 | 3126988 | 3126461 | 2773644 | 2773117 |
| 3394 | BPSL3199           | 55 | 2723087 | 2722695 | 2616632 | 2616240 | 2633511 | 2633119 | 2710703 | 2710311 | 2872895 | 2872503 | 1967564 | 1967956 | 3436716 | 3437108 | 2530792 | 2530400 | 3127404 | 3127012 | 2774060 | 2773668 |
| 3395 | BPSL3200           | 55 | 2723407 | 2723105 | 2616952 | 2616650 | 2633831 | 2633529 | 2711023 | 2710721 | 2873215 | 2872913 | 1967244 | 1967546 | 3436396 | 3436698 | 2531112 | 2530810 | 3127724 | 3127422 | 2774380 | 2774078 |
| 3396 | BPSL3201           | 55 | 2723954 | 2723418 | 2617499 | 2616963 | 2634378 | 2633842 | 2711570 | 2711034 | 2873762 | 2873226 | 1966697 | 1967233 | 3435849 | 3436385 | 2531659 | 2531123 | 3128271 | 3127735 | 2774927 | 2774391 |
| 3397 | BPSL3202           | 55 | 2724280 | 2723975 | 2617825 | 2617520 | 2634704 | 2634399 | 2711896 | 2711591 | 2874088 | 2873783 | 1966371 | 1966676 | 3435523 | 3435828 | 2531985 | 2531680 | 3128597 | 3128292 | 2775253 | 2774948 |
| 3398 | BPSL3203           | 55 | 2724658 | 2724293 | 2618203 | 2617838 | 2635082 | 2634717 | 2712274 | 2711909 | 2874466 | 2874101 | 1965993 | 1966358 | 3435145 | 3435510 | 253     |         |         |         |         |         |



|      |                    |    |         |         |         |         |         |         |         |         |         |         |         |         |         |         |         |         |         |         |         |         |
|------|--------------------|----|---------|---------|---------|---------|---------|---------|---------|---------|---------|---------|---------|---------|---------|---------|---------|---------|---------|---------|---------|---------|
| 3404 | BPSL3209           | 55 | 2727289 | 2727017 | 2620834 | 2620562 | 2637713 | 2637441 | 2713925 | 2713653 | 2877098 | 2876826 | 1963362 | 1963634 | 3432514 | 3432786 | 2534994 | 2534722 | 3131606 | 3131334 | 2778262 | 2777990 |
| 3405 | BPSL3210           | 55 | 2728127 | 2727303 | 2621672 | 2620848 | 2638551 | 2637727 | 2714763 | 2713939 | 2877936 | 2877112 | 1962524 | 1963348 | 3431676 | 3432500 | 2535832 | 2535008 | 3132444 | 3131260 | 2779100 | 2778276 |
| 3406 | BPSL3211           | 55 | 2728444 | 2728133 | 2621989 | 2621678 | 2638868 | 2638557 | 2715080 | 2714769 | 2878253 | 2877942 | 1962207 | 1962518 | 3431359 | 3431670 | 2536149 | 2535838 | 3132761 | 3132450 | 2779147 | 2779106 |
| 3407 | BPSL3212           | 55 | 2729061 | 2728444 | 2622606 | 2621989 | 2639485 | 2638868 | 2715697 | 2715080 | 2878870 | 2878253 | 1961590 | 1962207 | 3430742 | 3431359 | 2536766 | 2536149 | 3133378 | 3132761 | 2780034 | 2779417 |
| 3408 | BPSL3213           | 55 | 2729720 | 2729064 | 2623265 | 2622609 | 2640144 | 2639488 | 2716356 | 2715700 | 2879529 | 2878873 | 1960931 | 1961587 | 3430083 | 3430739 | 2537425 | 2536769 | 3134037 | 3133381 | 2780693 | 2780037 |
| 3409 | BPSL3214           | 55 | 2730218 | 2729910 | 2623763 | 2623455 | 2640642 | 2640334 | 2716854 | 2716546 | 2880027 | 2879719 | 1960433 | 1960741 | 3429585 | 3429893 | 2537923 | 2537615 | 3134535 | 3134227 | 2781191 | 2780883 |
| 3410 | BPSL3215           | 55 | 2731561 | 2730374 | 2625942 | 2624755 | 2663196 | 2662009 | 2718178 | 2716991 | 2901312 | 2900125 | 1959090 | 1960277 | 3428242 | 3429429 | 2559483 | 2558296 | 3135878 | 3134691 | 2802740 | 2801553 |
| 3411 | BPSL3216           | 55 | 2733705 | 2731606 | 2628086 | 2625987 | 2644477 | 2642378 | 2720322 | 2718223 | 2883046 | 2880947 | 1956946 | 1959045 | 3426098 | 3428197 | 2541217 | 2539118 | 3138022 | 3135923 | 2784410 | 2782311 |
| 3412 | BPSL3217           | 55 | 2734297 | 2733830 | 2628678 | 2628211 | 2645069 | 2644602 | 2720914 | 2720447 | 2883638 | 2883171 | 1956354 | 1956821 | 3425506 | 3425973 | 2541809 | 2541342 | 3138614 | 3138147 | 2785002 | 2784535 |
| 3413 | BPSL3218           | 55 | 2734848 | 2734471 | 2629229 | 2628852 | 2645620 | 2645243 | 2721465 | 2721088 | 2884189 | 2883812 | 1955803 | 1956180 | 3424955 | 3425332 | 2542360 | 2541983 | 3139165 | 3138788 | 2785553 | 2785176 |
| 3414 | BPSL3219           | 55 | 2736998 | 2735067 | 2631379 | 2629448 | 2647770 | 2645839 | 2723615 | 2721684 | 2886339 | 2884408 | 1953653 | 1955584 | 3422805 | 3424736 | 2544510 | 2542579 | 3141315 | 3139384 | 2787703 | 2785772 |
| 3415 | Chr1_153_ISBma1_A  | 55 | 2737048 | 2738352 | 2631429 | 2632733 | 2614893 | 2615748 | 2723665 | 2724969 | 2886389 | 2887693 | 1952299 | 1953603 | 3421451 | 3422755 | 2544560 | 2545864 | 3141365 | 3142669 | 2787753 | 2789057 |
| 3416 | BPSL3220           | 55 | 2742663 | 2738428 | 2637044 | 2632809 | 2653435 | 2649200 | 2729280 | 2725045 | 2892004 | 2887769 | 1947988 | 1952223 | 3417140 | 3421375 | 2550175 | 2545940 | 3146980 | 3142745 | 2793368 | 2789133 |
| 3417 | BPSL3221           | 55 | 2746791 | 2742688 | 2641172 | 2637069 | 2657563 | 2653460 | 2733408 | 2729305 | 2896132 | 2892029 | 1943860 | 1947963 | 3413012 | 3417115 | 2554303 | 2550200 | 3151108 | 3147005 | 2797496 | 2793393 |
| 3418 | BPSL3222           | 55 | 2747487 | 2747158 | 2641868 | 2641539 | 2658259 | 2657930 | 2734104 | 2733775 | 2896828 | 2896499 | 1943164 | 1943493 | 3412316 | 3412645 | 2554999 | 2554670 | 3151804 | 3151475 | 2798192 | 2797863 |
| 3419 | BPSL3223           | 55 | 2748090 | 2747596 | 2642471 | 2641977 | 2658862 | 2658368 | 2734707 | 2734213 | 2897431 | 2896937 | 1942561 | 1943055 | 3411713 | 3412207 | 2555602 | 2555108 | 3152407 | 3151913 | 2798795 | 2798301 |
| 3420 | BPSL3224           | 55 | 2749086 | 2748391 | 2643467 | 2642772 | 2659858 | 2659163 | 2735703 | 2735008 | 2898427 | 2897732 | 1941565 | 1942260 | 3410717 | 3411412 | 2556598 | 2555903 | 3153403 | 3152708 | 2799791 | 2799096 |
| 3421 | BPSL3225           | 55 | 2749518 | 2749090 | 2643899 | 2643471 | 2660290 | 2659862 | 2736135 | 2735707 | 2898859 | 2898431 | 1941133 | 1941561 | 3410285 | 3410713 | 2557030 | 2556602 | 3153835 | 3153407 | 2800223 | 2799795 |
| 3422 | BPSL3226           | 55 | 2750221 | 2749667 | 2644643 | 2644089 | 2661446 | 2660892 | 2736838 | 2736284 | 2899562 | 2899008 | 1940430 | 1940984 | 3409582 | 3410136 | 2557733 | 2557179 | 3154538 | 3153984 | 2800990 | 2800436 |
| 3423 | BPSL3227           | 55 | 2750603 | 2750226 | 2645025 | 2644648 | 2661828 | 2661451 | 2737220 | 2736843 | 2899944 | 2899567 | 1940048 | 1940425 | 3409200 | 3409577 | 2558115 | 2557738 | 3154920 | 3154543 | 2801372 | 2800995 |
| 3424 | BPSL3228           | 55 | 2751971 | 2750784 | 2646393 | 2645206 | 2663196 | 2662009 | 2738588 | 2737401 | 2901312 | 2900125 | 1938680 | 1939867 | 3407832 | 3409019 | 2559483 | 2558296 | 3156288 | 3155101 | 2802740 | 2801553 |
| 3425 | Chr1_154a_IS407A_A |    | 2752854 | 2754089 | 2647276 | 2648511 | 2664079 | 2665314 | 2739471 | 2740706 | 2902195 | 2903430 | 1936574 | 1937809 | 3405726 | 3406961 | 2560366 | 2561601 | 3157171 | 3158406 | 2803324 | 2804559 |
| 3426 | Chr1_154b_IS407A_A |    | 2671093 | 2672328 | 2564570 | 2565805 | 2581218 | 2582453 | 2659248 | 2660362 | 2820240 | 2821475 | 2019764 | 2020999 | 3488844 | 3490079 | ?       | ?       | 3075556 | 3076791 | 2728534 | 2729133 |
| 3427 | BPSL3229           | 56 | 2679640 | 2678366 | 2573034 | 2571760 | 2589560 | 2588286 | 2667258 | 2665984 | 2828856 | 2827582 | 2012453 | 2013727 | 3481533 | 3482807 | 2485703 | 2485143 | 3084102 | 3082828 | 2730686 | 2729412 |
| 3428 | BPSL3230           | 56 | 2680827 | 2681822 | 2574213 | 2575208 | 2590739 | 2591734 | 2668445 | 2669440 | 2829884 | 2830879 | 2011848 | 2010853 | 3480928 | 3479933 | 2486420 | 2487415 | 3084753 | 3085748 | 2731337 | 2732332 |
| 3429 | BPSL3231           | 56 | 2681888 | 2682169 | 2575274 | 2575555 | 2591800 | 2592081 | 2669506 | 2669787 | 2830945 | 2831226 | 2010787 | 2010506 | 3479867 | 3479586 | 2487481 | 2487762 | 3085814 | 3086095 | 2732398 | 2732679 |
| 3430 | BPSL3232           | 56 | 2682183 | 2682983 | 2575569 | 2576369 | 2592095 | 2592895 | 2669801 | 2670061 | 2831240 | 2832040 | 2010492 | 2009692 | 3479572 | 3478772 | 2487776 | 2488576 | 3086109 | 3086909 | 2732693 | 2733493 |
| 3431 | BPSL3233           | 56 | 2683022 | 2683639 | 2576408 | 2577025 | 2592934 | 2593551 | 2670640 | 2671257 | 2832079 | 2832696 | 2009379 | 2009035 | 3478459 | 3478115 | 2488889 | 2489233 | 3086948 | 3087565 | 2733532 | 2734149 |
| 3432 | BPSL3234           | 56 | 2683644 | 2684729 | 2577030 | 2578115 | 2593556 | 2594641 | 2671262 | 2672347 | 2832701 | 2833786 | 2009030 | 2007945 | 3478110 | 3477025 | 2489238 | 2490323 | 3087570 | 3088655 | 2734154 | 2735239 |
| 3433 | BPSL3235           | 56 | 2684854 | 2685681 | 2578399 | 2579226 | 2595278 | 2596105 | 2672470 | 2673297 | 2834641 | 2835468 | 2007820 | 2006993 | 3476900 | 3476703 | 2490512 | 2491339 | 3088780 | 3089607 | 2735436 | 2736263 |
| 3434 | BPSL3236           | 56 | 2685711 | 2686307 | 2579256 | 2579852 | 2596135 | 2596731 | 2673227 | 2673923 | 2835498 | 2836094 | 2006963 | 2006367 | 3476043 | 3475447 | 2491369 | 2491965 | 3089637 | 3090233 | 2736293 | 2736889 |
| 3435 | BPSL3237           | 56 | 2686537 | 2687196 | 2580082 | 2580741 | 2596961 | 2597620 | 2674153 | 2674812 | 2836324 | 2836983 | 2006137 | 2005478 | 3475217 | 3474558 | 2492195 | 2492854 | 3090463 | 3091122 | 2737119 | 2737778 |
| 3436 | BPSL3238           | 56 | 2687833 | 2687321 | 2581378 | 2580866 | 2598257 | 2597745 | 2675449 | 2674937 | 2837620 | 2837108 | 2004841 | 2005353 | 3473921 | 3474433 | 2493491 | 2492979 | 3091759 | 3091247 | 2738415 | 2737903 |
| 3437 | BPSL3239           | 56 | 2687985 | 2689079 | 2581530 | 2582624 | 2598409 | 2599503 | 2675601 | 2676695 | 2837772 | 2838866 | 2004689 | 2003595 | 3473769 | 3472675 | 2493643 | 2494002 | 3091911 | 3093005 | 2738567 | 2739661 |
| 3438 | Chr1_155_ISBma2_B  | 56 |         |         |         |         |         |         |         |         |         |         | 2001853 | 2003425 | 3470928 | 3472505 | 2494952 | 2496499 |         |         |         |         |
| 3439 | BPSL3240           | 56 | 2689515 | 2689321 | 2583060 | 2582866 | 2599939 | 2599745 | 2677131 | 2676937 | 2839302 | 2839108 | 2001562 | 2001756 | 3470637 | 3470831 | 2496790 | 2496596 | 3093441 | 3093247 | 2740097 | 2739903 |
| 3440 | BPSL3241           | 56 | 2689835 | 2693413 | 2583380 | 2586958 | 2600259 | 2603837 | 2677451 | 2681029 | 2839622 | 2843200 | 2001242 | 1997664 | 3470317 | 3466739 | 2497110 | 2500688 | 3093761 | 3097339 | 2740417 | 2743995 |
| 3441 | BPSL3242           | 56 | 2696171 | 2693904 | 2589716 | 2587449 | 2606595 | 2604328 | 2683787 | 2681520 | 2845979 | 2843712 | 1994829 | 1997096 | 3463981 | 3466248 | 2503439 | 2501172 | 3100139 | 3097872 | 2746795 | 2744528 |
| 3442 | BPSL3243           | 56 | 2696700 | 2697383 | 2590245 | 2590928 | 2607124 | 2607807 | 2684316 | 2684999 | 2846508 | 2847191 | 1994300 | 1993617 | 3463452 | 3462769 | 2503968 | 2504651 | 3100668 | 3101351 | 2747324 | 2748007 |
| 3443 | BPSL3244           | 56 | 2697688 | 2698281 | 2591233 | 2591826 | 2608112 | 2608705 | 2685304 | 2685897 | 2847496 | 2848089 | 1993312 | 1992719 | 3462464 | 3461871 | 2504956 | 2505549 | 3101656 | 3102249 | 2748312 | 2748905 |
| 3444 | BPSL3245           | 56 | 2698667 | 2699239 | 2592212 | 2592784 | 2609091 | 2609663 | 2686283 | 2686855 | 2848475 | 2849047 | 1992333 | 1991761 | 3461485 | 3460913 | 2505935 | 2506507 | 3102635 | 3103207 | 2749291 | 2749863 |
| 3445 | BPSL3246           | 56 | 2699395 | 2700336 | 2592940 | 2593881 | 2609819 | 2610760 | 2687011 | 2687952 | 2849203 | 2850144 | 1991605 | 1990664 | 3460757 | 3459816 | 2506663 | 2507604 | 3103363 | 3104304 | 2750019 | 2750960 |
| 3446 | BPSL3247           | 56 | 2700784 | 2702184 | 2594329 | 2595729 | 2611208 | 2612608 | 2688400 | 2689800 | 2850592 | 2851992 | 1990216 | 1988816 | 3459368 | 3457968 | 2508052 | 2509452 | 3104752 | 3106152 | 2751408 | 2752808 |
| 3447 | BPSL3248           | 56 | 2702314 | 2703561 | 2595859 | 2597106 | 2612738 | 2613985 | 2688930 | 2691177 | 2852122 | 2853369 | 1988686 | 1987439 | 3457838 | 3456591 | 2509582 | 2510829 | 3106282 | 3107529 | 2752938 | 2754185 |
| 3448 | BPSL3249           | 56 | 2703584 | 2704411 | 2597129 | 2597956 | 2614008 | 2614835 | 2691200 | 2692027 | 2853392 | 2854219 | 1987416 | 1986589 | 3456568 | 3455741 | 2510852 | 2511679 | 3107552 | 3108379 | 2754208 | 2755035 |
| 3449 | Chr1_156_ISBma1_A  | 56 | 2704469 | 2705324 | 2598014 | 2598869 | 2614893 | 2615748 | 2692085 | 2692940 | 2854277 | 2855132 | 1985332 | 1986531 | 3454484 | 3455683 | 2511737 |         |         |         |         |         |



|      |          |    |                   |         |         |         |         |         |         |         |         |         |         |         |         |         |         |         |         |         |         |         |
|------|----------|----|-------------------|---------|---------|---------|---------|---------|---------|---------|---------|---------|---------|---------|---------|---------|---------|---------|---------|---------|---------|---------|
| 3506 | BPSL3297 | 59 | 2944238           | 2943075 | 2841280 | 2840117 | 2856342 | 2855179 | 2930769 | 2929606 | 3093495 | 3092332 | 1733664 | 1734827 | 3086744 | 3087907 | 2625795 | 2626958 | 3391619 | 3390456 | 2961958 | 2960795 |
| 3507 | BPSL3298 | 59 | 2944848           | 2944348 | 2841890 | 2841390 | 2856952 | 2856452 | 2931379 | 2930879 | 3094105 | 3093605 | 1733054 | 1733554 | 3086134 | 3086634 | 2625185 | 2625685 | 3392229 | 3391729 | 2962568 | 2962068 |
| 3508 | BPSL3299 | 59 | 2945774           | 2945049 | 2842816 | 2842091 | 2857878 | 2857153 | 2932305 | 2931580 | 3095031 | 3094306 | 1732128 | 1732853 | 3085208 | 3085933 | 2624259 | 2624984 | 3393155 | 3392430 | 2963494 | 2962769 |
| 3509 | BPSL3300 | 59 | 2946204           | 2945779 | 2843246 | 2842821 | 2858308 | 2857883 | 2932735 | 2932310 | 3095461 | 3095036 | 1731698 | 1732123 | 3084778 | 3085203 | 2623829 | 2624254 | 3393585 | 3393160 | 2963924 | 2963499 |
| 3510 | BPSL3301 | 59 | 2947623           | 2946523 | 2844665 | 2843565 | 2859727 | 2858627 | 2934154 | 2933054 | 3096880 | 3095780 | 1730279 | 1731379 | 3083755 | 3084459 | 2622410 | 2623510 | 3395004 | 3393904 | 2965343 | 2964243 |
| 3511 | BPSL3302 | 59 | 2948324           | 2947623 | 2845366 | 2844665 | 2860428 | 2859727 | 2934855 | 2934154 | 3097581 | 3096880 | 1729578 | 1730279 | 3082660 | 3083361 | 2621709 | 2622410 | 3395705 | 3395004 | 2966044 | 2965343 |
| 3512 | BPSL3303 | 59 | 2949268           | 2948324 | 2846494 | 2846069 | 2861972 | 2861544 | 2935807 | 2935385 | 3098574 | 3098164 | 1728634 | 1729578 | 3081716 | 3082660 | 2621233 | 2621709 | 3396639 | 3396178 | 2966921 | 2966502 |
| 3513 | BPSL3304 | 59 | 2951293           | 2949275 | 2848519 | 2846501 | 2863997 | 2861979 | 2937832 | 2935814 | 3100599 | 3098581 | 1726609 | 1728627 | 3079691 | 3081709 | 2617958 | 2619976 | 3398664 | 3396646 | 2968946 | 2966928 |
| 3514 | BPSL3305 | 59 | 2951861           | 2951337 | 2849087 | 2848563 | 2864565 | 2864041 | 2938400 | 2937876 | 3101167 | 3100643 | 1726041 | 1726565 | 3079123 | 3079647 | 2617390 | 2617914 | 3399232 | 3398708 | 2969514 | 2968990 |
| 3515 | BPSL3306 | 59 | 2953832           | 2951895 | 2850416 | 2849121 | 2865900 | 2864599 | 2939921 | 2938434 | 3102529 | 3101201 | 1724700 | 1726007 | 3077152 | 3079089 | 2615154 | 2616158 | 3401203 | 3399266 | 2970891 | 2969548 |
| 3516 | BPSL3307 | 59 | 2954607           | 2954230 | 2852325 | 2851948 | 2867833 | 2867456 | 2940849 | 2940472 | 3103983 | 3103606 | 1723295 | 1723672 | 3076377 | 3076754 | 2614742 | 2615119 | 3401978 | 3401601 | 2972131 | 2971754 |
| 3517 | BPSL3308 | 59 | 2955658           | 2955275 | 2853376 | 2852993 | 2868884 | 2868501 | 2941900 | 2941517 | 3105034 | 3104651 | 1722244 | 1722627 | 3075326 | 3075709 | 2613691 | 2614074 | 3403029 | 3402646 | 2973182 | 2972799 |
| 3518 | BPSL3309 | 59 | 2956535           | 2955678 | 2854253 | 2853396 | 2869761 | 2868904 | 2942777 | 2941920 | 3105911 | 3105054 | 1721367 | 1722224 | 3074449 | 3075306 | 2612814 | 2613671 | 3403906 | 3403049 | 2974059 | 2973202 |
| 3519 | BPSL3310 | 59 | 2957280           | 2956732 | 2854998 | 2854450 | 2870506 | 2869958 | 2943522 | 2942974 | 3106656 | 3106108 | 1720622 | 1721170 | 3073704 | 3074252 | 2612069 | 2612617 | 3404651 | 3404103 | 2974804 | 2974256 |
| 3520 | BPSL3311 | 59 | 2957694           | 2957377 | 2855212 | 2855095 | 2870920 | 2870603 | 2943936 | 2943619 | 3107070 | 3106753 | 1720208 | 1720525 | 3073290 | 3073607 | 2611655 | 2611972 | 3405065 | 3404748 | 2975218 | 2974901 |
| 3521 | BPSL3312 | 59 | 2958288           | 2959349 | 2856006 | 2857067 | 2871514 | 2872575 | 2944530 | 2945591 | 3107664 | 3108725 | 1719614 | 1718553 | 3072696 | 3071635 | 2611061 | 2610000 | 3405659 | 3406720 | 2975812 | 2976873 |
| 3522 | BPSL3313 | 59 | 2959752           | 2959459 | 2857470 | 2857177 | 2872978 | 2872685 | 2945994 | 2945701 | 3109128 | 3108835 | 1718150 | 1718443 | 3071232 | 3071525 | 2609597 | 2609890 | 3407123 | 3406830 | 2977276 | 2976983 |
| 3523 | BPSL3314 | 59 | 2960058           | 2960759 | 2857776 | 2858477 | 2873284 | 2873985 | 2946300 | 2947001 | 3109434 | 3110135 | 1717844 | 1717143 | 3070926 | 3070225 | 2609291 | 2608590 | 3407429 | 3408130 | 2977582 | 2978283 |
| 3524 | BPSL3315 | 59 | 2961793           | 2960954 | 2859511 | 2858672 | 2875019 | 2874180 | 2948035 | 2947196 | 3111169 | 3110330 | 1716109 | 1716948 | 3069191 | 3070030 | 2607556 | 2608395 | 3409164 | 3408325 | 2979317 | 2978478 |
| 3525 | BPSL3316 | 59 | 2962782           | 2961895 | 2860500 | 2859613 | 2876008 | 2875121 | 2949024 | 2948137 | 3112158 | 3111271 | 1715120 | 1716007 | 3068202 | 3069089 | 2606567 | 2607454 | 3410153 | 3409266 | 2980306 | 2979419 |
| 3526 | BPSL3317 | 59 | 2962933           | 2963538 | 2860651 | 2861256 | 2876159 | 2876764 | 2949175 | 2949780 | 3112309 | 3112914 | 1714969 | 1714364 | 3068051 | 3067446 | 2606416 | 2605811 | 3410304 | 3410909 | 2980457 | 2981062 |
| 3527 | BPSL3318 | 59 | 2964140           | 2963931 | 2861858 | 2861649 | 2877366 | 2877157 | 2950382 | 2950173 | 3113516 | 3113307 | 1713762 | 1713971 | 3066844 | 3067053 | 2605209 | 2605418 | 3411511 | 3411302 | 2981664 | 2981455 |
| 3528 | BPSL3319 | 59 | 2964698           | 2965861 | 2862412 | 2863579 | 2877924 | 2879087 | 2950940 | 2952103 | 3114074 | 3115237 | 1713204 | 1712041 | 3066286 | 3065123 | 2604651 | 2603488 | 3412069 | 3412332 | 2982222 | 2983385 |
| 3529 | BPSL3320 | 59 | 2966014           | 2967531 | 2863732 | 2865249 | 2879240 | 2880757 | 2952256 | 2953773 | 3115390 | 3116907 | 1711888 | 1710371 | 3064970 | 3063453 | 2603335 | 2601818 | 3413385 | 3414902 | 2983538 | 2985055 |
| 3530 | BPSL3321 | 59 | 2967548           | 2967859 | 2865266 | 2865577 | 2880774 | 2881085 | 2953790 | 2954101 | 3116924 | 3117235 | 1710354 | 1710043 | 3063436 | 3063125 | 2601801 | 2601490 | 3414919 | 3415227 | 2985072 | 2985380 |
| 3531 | BPSL3322 | 59 | 2968085           | 2970412 | 2865803 | 2868130 | 2881311 | 2883638 | 2954327 | 2956654 | 3117461 | 3119788 | 1709817 | 1707490 | 3062899 | 3060572 | 2601264 | 2598937 | 3415456 | 3417783 | 2985609 | 2987936 |
| 3532 | BPSL3323 | 59 | 2970412           | 2971557 | 2868130 | 2869275 | 2883638 | 2884783 | 2956654 | 2957799 | 3119788 | 3120933 | 1707490 | 1706345 | 3060572 | 3059427 | 2598937 | 2597792 | 3417783 | 3418928 | 2987936 | 2989081 |
| 3533 | BPSL3324 | 59 | 2971557           | 2972588 | 2869275 | 2870306 | 2884783 | 2885814 | 2957799 | 2958830 | 3120933 | 3121964 | 1706345 | 1705314 | 3059427 | 3058396 | 2597792 | 2596761 | 3418928 | 3419959 | 2989081 | 2990112 |
| 3534 | BPSL3325 | 59 | 2972603           | 2972821 | 2870321 | 2870539 | 2885829 | 2886047 | 2958845 | 2959063 | 3121979 | 3122197 | 1705299 | 1705081 | 3058381 | 3058163 | 2596746 | 2596528 | 3419974 | 3420192 | 2990127 | 2990345 |
| 3535 | BPSL3326 | 59 | 2972827           | 2973888 | 2870545 | 2871606 | 2886053 | 2887114 | 2959069 | 2960130 | 3122203 | 3123264 | 1705075 | 1704014 | 3058157 | 3057096 | 2596522 | 2595461 | 3420198 | 3421259 | 2990351 | 2991412 |
| 3536 | BPSL3327 | 59 | 2973888           | 2974649 | 2871606 | 2872367 | 2887114 | 2887875 | 2960130 | 2960891 | 3123264 | 3124025 | 1704014 | 1703253 | 3057096 | 3056335 | 2595461 | 2594700 | 3421259 | 3422020 | 2991412 | 2992173 |
| 3537 | BPSL3328 | 59 | 2974652           | 2975281 | 2872370 | 2872999 | 2887878 | 2888507 | 2960894 | 2961523 | 3124028 | 3124657 | 1703250 | 1702621 | 3056332 | 3055703 | 2594697 | 2594068 | 3422023 | 3422652 | 2992176 | 2992805 |
| 3538 | BPSL3329 | 59 | 2975286           | 2976347 | 2873004 | 2874065 | 2888512 | 2889573 | 2961528 | 2962589 | 3124662 | 3125273 | 1702616 | 1701555 | 3055698 | 3054637 | 2594063 | 2593002 | 3422657 | 3423718 | 2992810 | 2993871 |
| 3539 | BPSL3330 | 59 | 2977167           | 2976433 | 2874885 | 2874151 | 2890393 | 2889659 | 2963409 | 2962675 | 3126543 | 3125809 | 1700735 | 1701469 | 3053817 | 3054551 | 2592182 | 2592916 | 3424538 | 3423804 | 2994691 | 2993957 |
| 3540 | BPSL3331 | 59 | 2977893           | 2977495 | 2875611 | 2875213 | 2891119 | 2890721 | 2964135 | 2963737 | 3127269 | 3126871 | 1700009 | 1700407 | 3053091 | 3053489 | 2591456 | 2591854 | 3425264 | 3424866 | 2995417 | 2995019 |
| 3541 | BPSL3332 | 59 | 2978460           | 2979080 | 2876178 | 2876798 | 2891686 | 2892246 | 2964702 | 2965322 | 3127836 | 3128456 | 1699442 | 1698822 | 3052524 | 3051904 | 2590889 | 2590269 | 3425831 | 3426451 | 2995984 | 2996604 |
| 3542 | BPSL3333 | 59 | 2981117           | 2979387 | 2878835 | 2877105 | 2894344 | 2892614 | 2967359 | 2965629 | 3130493 | 3128763 | 1696785 | 1698515 | 3049867 | 3051597 | 2588232 | 2589962 | 3428488 | 3426758 | 2998641 | 2996911 |
| 3543 | BPSL3334 | 59 | 2982263           | 2981580 | 2879981 | 2879298 | 2895490 | 2894807 | 2968505 | 2967822 | 3131639 | 3130956 | 1695639 | 1696322 | 3048721 | 3049404 | 2587086 | 2587769 | 3429634 | 3428951 | 2999787 | 2999104 |
| 3544 | BPSL3335 | 59 | 2982688           | 2982263 | 2880406 | 2879981 | 2895915 | 2895490 | 2968930 | 2968505 | 3132064 | 3131639 | 1695214 | 1695639 | 3048296 | 3048721 | 2586661 | 2587086 | 3430059 | 3429634 | 3000212 | 2999787 |
| 3545 | BPSL3336 | 59 | 2983422           | 2982751 | 2881140 | 2880469 | 2896649 | 2895978 | 2969664 | 2968993 | 3132798 | 3132127 | 1694480 | 1695151 | 3047562 | 3048233 | 2585927 | 2586598 | 3430793 | 3430122 | 3000946 | 3000275 |
| 3546 | BPSL3337 | 59 | 2984460           | 2985278 | 2882178 | 2882996 | 2897687 | 2898505 | 2970702 | 2971520 | 3133836 | 3134654 | 1693442 | 1692624 | 3046524 | 3045706 | 2584889 | 2584071 | 3431831 | 3432649 | 3001984 | 3002802 |
| 3547 | BPSL3338 | 59 | 2987151           | 2985337 | 2884869 | 2883055 | 2900378 | 2898564 | 2973393 | 2971579 | 3136527 | 3134713 | 1690756 | 1692246 | 3043838 | 3045328 | 2582198 | 2584012 | 3434522 | 3432708 | 3004675 | 3002861 |
| 3548 | BPSL3339 | 59 | 2989081           | 2987423 | 2886799 | 2885141 | 2902308 | 2900650 | 2975326 | 2973668 | 3138457 | 3136799 | 1688826 | 1690484 | 3041908 | 3043566 | 2580268 | 2581926 | 3436452 | 3434794 | 3006605 | 3004947 |
| 3549 | BPSL3340 | 59 | 2989965           | 2989267 | 2887683 | 2886985 | 2903192 | 2902494 | 2976210 | 2975512 | 3139341 | 3138643 | 1687942 | 1688640 | 3041024 | 3041722 | 2579384 | 2580082 | 3437336 | 3436638 | 3007489 | 3006791 |
| 3550 | BPSL3341 | 59 | 2990731           | 2990417 | 2888449 | 2888135 | 2903958 | 2903644 | 2976976 | 2976662 | 3140107 | 3139793 | 1687176 | 1687490 | 3040258 | 3040572 | 2578618 | 2578932 | 3438102 | 3437788 | 3008255 | 3007941 |
| 3551 |          |    | Chr1_161_IS407A_A | 2991437 | 2992672 | 2889155 | 2890390 | 2904664 | 2905899 |         |         |         |         |         |         |         |         |         |         |         |         |         |





|      |          |   |         |         |         |         |         |         |         |         |         |         |         |         |         |         |         |         |         |         |         |         |
|------|----------|---|---------|---------|---------|---------|---------|---------|---------|---------|---------|---------|---------|---------|---------|---------|---------|---------|---------|---------|---------|---------|
| 3608 | BPSL3396 | 1 | 3048015 | 3049406 | 2945934 | 2947325 | 2962305 | 2963696 | 3034260 | 3035651 | 3204672 | 3203281 | 1629893 | 1628502 | 2974120 | 2975511 | 2869916 | 2871307 | 3318977 | 3317586 | 3085561 | 3086952 |
| 3609 | BPSL3397 | 1 | 3047060 | 3047932 | 2944979 | 2945851 | 2961350 | 2962222 | 3033305 | 3034177 | 3205627 | 3204755 | 1630848 | 1629976 | 2973165 | 2974037 | 2868961 | 2869833 | 3319932 | 3319060 | 3084606 | 3085478 |
| 3610 | BPSL3398 | 1 | 3045447 | 3046985 | 2943366 | 2944904 | 2959108 | 2960646 | 3031692 | 3033230 | 3207241 | 3205703 | 1632461 | 1630923 | 2971552 | 2973090 | 2867347 | 2868885 | 3321545 | 3320007 | 3082923 | 3084461 |
| 3611 | BPSL3399 | 1 | 3044861 | 3045397 | 2942780 | 2943316 | 2958522 | 2959058 | 3031106 | 3031642 | 3207827 | 3207291 | 1633047 | 1632511 | 2970966 | 2971502 | 2866761 | 2867297 | 3322131 | 3321595 | 3082337 | 3082873 |
| 3612 | BPSL3400 | 1 | 3044418 | 3044855 | 2942337 | 2942774 | 2958079 | 2958516 | 3030663 | 3031100 | 3208270 | 3207833 | 1633490 | 1633053 | 2970523 | 2970960 | 2866318 | 2866755 | 3322574 | 3322137 | 3081894 | 3082331 |
| 3613 | BPSL3401 | 1 | 3043985 | 3044257 | 2941904 | 2942176 | 2957646 | 2957918 | 3030230 | 3030502 | 3208703 | 3208431 | 1633923 | 1633651 | 2970090 | 2970362 | 2865885 | 2866157 | 3323007 | 3322735 | 3081461 | 3081733 |
| 3614 | BPSL3402 | 1 | 3043045 | 3043911 | 2940964 | 2941830 | 2956706 | 2957572 | 3029290 | 3030156 | 3209643 | 3208777 | 1634863 | 1633997 | 2969150 | 2970016 | 2864945 | 2865811 | 3323947 | 3323081 | 3080521 | 3081387 |
| 3615 | BPSL3403 | 1 | 3042420 | 3042947 | 2940339 | 2940866 | 2956081 | 2956608 | 3028665 | 3029192 | 3210268 | 3209741 | 1635488 | 1634961 | 2968525 | 2969052 | 2864320 | 2864847 | 3324572 | 3324045 | 3079896 | 3080423 |
| 3616 | BPSL3404 | 1 | 3040998 | 3042146 | 2938917 | 2940065 | 2954659 | 2955807 | 3027243 | 3028391 | 3211690 | 3210542 | 1636910 | 1635762 | 2967103 | 2968251 | 2862898 | 2864046 | 3325994 | 3324846 | 3078474 | 3079622 |
| 3617 | BPSL3405 | 1 | 3040121 | 3041005 | 2938040 | 2938924 | 2953782 | 2954666 | 3026366 | 3027250 | 3212567 | 3211683 | 1637787 | 1636903 | 2966226 | 2967110 | 2862021 | 2862905 | 3326871 | 3325987 | 3077597 | 3078481 |
| 3618 | BPSL3406 | 1 | 3039291 | 3040082 | 2937210 | 2938001 | 2952952 | 2953743 | 3025536 | 3026327 | 3213397 | 3212606 | 1638617 | 1637826 | 2965396 | 2966187 | 2861191 | 2861982 | 3327701 | 3326910 | 3076767 | 3077558 |
| 3619 | BPSL3407 | 1 | 3038570 | 3039259 | 2936489 | 2937178 | 2952231 | 2952920 | 3024815 | 3025504 | 3214118 | 3213429 | 1639338 | 1638649 | 2964675 | 2965364 | 2860470 | 2861159 | 3328422 | 3327733 | 3076046 | 3076735 |
| 3620 | BPSL3408 | 1 | 3036594 | 3038564 | 2934513 | 2936483 | 2950255 | 2952225 | 3022839 | 3024809 | 3216094 | 3214124 | 1641314 | 1639344 | 2962699 | 2964669 | 2858494 | 2860464 | 3330398 | 3328428 | 3074070 | 3076040 |
| 3621 | BPSL3409 | 1 | 3035677 | 3036429 | 2933596 | 2934348 | 2949338 | 2950090 | 3021922 | 3022674 | 3217011 | 3216259 | 1642231 | 1641479 | 2961782 | 2962534 | 2857577 | 2858329 | 3331315 | 3330563 | 3073153 | 3073905 |
| 3622 | BPSL3410 | 1 | 3033890 | 3035671 | 2931809 | 2933590 | 2947551 | 2949332 | 3020135 | 3021916 | 3218798 | 3217017 | 1644018 | 1642237 | 2959995 | 2961776 | 2855789 | 2857465 | 3333102 | 3331321 | 3071366 | 3073147 |
| 3623 | BPSL3411 | 1 | 3032830 | 3033882 | 2930749 | 2931801 | 2946491 | 2947543 | 3019075 | 3020127 | 3219858 | 3218806 | 1645078 | 1644026 | 2958935 | 2959987 | 2854729 | 2855781 | 3334162 | 3333110 | 3070306 | 3071358 |
| 3624 | BPSL3412 | 1 | 3031360 | 3032514 | 2929279 | 2930433 | 2945021 | 2946175 | 3017605 | 3018759 | 3221328 | 3220174 | 1646548 | 1645394 | 2957465 | 2958619 | 2853259 | 2854413 | 3335632 | 3334478 | 3068836 | 3069990 |
| 3625 | BPSL3413 | 1 | 3029804 | 3031036 | 2927273 | 2928955 | 2943465 | 2944697 | 3016049 | 3017281 | 3222884 | 3221652 | 1648104 | 1646872 | 2955909 | 2957141 | 2851703 | 2852935 | 3337188 | 3335956 | 3067280 | 3068512 |
| 3626 | BPSL3414 | 1 | 3028417 | 3029391 | 2926336 | 2927310 | 2942078 | 2943052 | 3014662 | 3015636 | 3224271 | 3223297 | 1649491 | 1648517 | 2954522 | 2955496 | 2850316 | 2851290 | 3338575 | 3337601 | 3065893 | 3066867 |
| 3627 | BPSL3415 | 1 | 3027536 | 3028417 | 2925455 | 2926336 | 2941197 | 2942078 | 3013781 | 3014662 | 3225152 | 3224271 | 1650372 | 1649491 | 2953641 | 2954522 | 2849435 | 2850316 | 3339456 | 3338575 | 3065012 | 3065893 |
| 3628 | BPSL3416 | 1 | 3026200 | 3027393 | 2924119 | 2925312 | 2939861 | 2941054 | 3012445 | 3013638 | 3226488 | 3225295 | 1651706 | 1651671 | 2952307 | 2952342 | 2848101 | 2848136 | 3340792 | 3339599 | 3063676 | 3064869 |
| 3629 | BPSL3417 | 1 | 3025377 | 3026129 | 2923296 | 2924048 | 2939308 | 2939790 | 3011622 | 3012374 | 3227311 | 3226559 | 1652529 | 1651777 | 2951484 | 2952236 | 2847278 | 2848030 | 3341615 | 3340863 | 3062853 | 3063605 |
| 3630 | BPSL3418 | 1 | 3024601 | 3025377 | 2922520 | 2923296 | 2938262 | 2939038 | 3010846 | 3011622 | 3228087 | 3227311 | 1653305 | 1652529 | 2950708 | 2951484 | 2846502 | 2847278 | 3342391 | 3341615 | 3062077 | 3062853 |
| 3631 | BPSL3419 | 1 | 3022416 | 3024098 | 2920335 | 2922017 | 2936077 | 2937759 | 3008661 | 3010343 | 3230272 | 3228590 | 1655490 | 1653808 | 2948523 | 2950205 | 2844317 | 2845999 | 3344576 | 3342894 | 3059892 | 3061574 |
| 3632 | BPSL3420 | 1 | 3020715 | 3022238 | 2918634 | 2920157 | 2934376 | 2935899 | 3006960 | 3008483 | 3231973 | 3230450 | 1657191 | 1655668 | 2946822 | 2948345 | 2842616 | 2844139 | 3346277 | 3344754 | 3058191 | 3059714 |
| 3633 | BPSL3421 | 1 | 3020574 | 3019678 | 2918493 | 2917597 | 2934235 | 2933339 | 3006819 | 3005923 | 3232114 | 3233010 | 1657332 | 1658228 | 2946681 | 2945785 | 2842475 | 2841579 | 3346418 | 3347314 | 3058050 | 3057154 |
| 3634 | BPSL3422 | 1 | 3019284 | 3018757 | 2917203 | 2916676 | 2932945 | 2932418 | 3005529 | 3005002 | 3233404 | 3233931 | 1658622 | 1659149 | 2945391 | 2944864 | 2841185 | 2840658 | 3347708 | 3348235 | 3056760 | 3056233 |
| 3635 | BPSL3423 | 1 | 3018102 | 3018650 | 2916021 | 2916569 | 2931763 | 2932311 | 3004347 | 3004895 | 3234586 | 3234038 | 1659804 | 1659256 | 2944209 | 2944757 | 2840003 | 2840551 | 3348890 | 3348342 | 3055578 | 3056126 |
| 3636 | BPSL3424 | 1 | 3018018 | 3017128 | 2915937 | 2915047 | 2931679 | 2930789 | 3004263 | 3003373 | 3234670 | 3235560 | 1659888 | 1660778 | 2944125 | 2943235 | 2839919 | 2839029 | 3348974 | 3349864 | 3055494 | 3054604 |
| 3637 | BPSL3425 | 1 | 3017041 | 3016739 | 2914960 | 2914658 | 2930702 | 2930400 | 3003286 | 3002984 | 3235647 | 3235949 | 1660865 | 1661167 | 2943148 | 2942846 | 2838942 | 2838640 | 3349951 | 3350253 | 3054517 | 3054215 |
| 3638 | BPSL3426 | 1 | 3016301 | 3015612 | 2914220 | 2913531 | 2929962 | 2929273 | 3002546 | 3001857 | 3236387 | 3237076 | 1661605 | 1662294 | 2942408 | 2941719 | 2838202 | 2837513 | 3350691 | 3351380 | 3053777 | 3053088 |
| 3639 | BPSL3427 | 1 | 3015502 | 3014018 | 2913421 | 2911937 | 2929163 | 2927679 | 3001747 | 3000263 | 3237186 | 3238670 | 1662404 | 1663885 | 2941609 | 2940128 | 2837403 | 2835922 | 3351490 | 3352971 | 3052978 | 3051497 |
| 3640 | BPSL3428 | 1 | 3013061 | 3013570 | 2910980 | 2911489 | 2926722 | 2927231 | 2999306 | 2999815 | 3239627 | 3239118 | 1664842 | 1664333 | 2939171 | 2939680 | 2834965 | 2835474 | 3353928 | 3353419 | 3050540 | 3051049 |
| 3641 | BPSL3429 | 1 | 3011966 | 3012748 | 2909663 | 2909890 | 2925405 | 2925632 | 2997989 | 2998216 | 3240944 | 3240717 | 1666159 | 1665932 | 2937854 | 2938081 | 2833648 | 2833875 | 3355245 | 3355018 | 3049223 | 3049450 |
| 3642 | BPSL3430 | 1 | 3010807 | 3011514 | 2908726 | 2909433 | 2924468 | 2925175 | 2997052 | 2997759 | 3241881 | 3241174 | 1667096 | 1666389 | 2936917 | 2937624 | 2832711 | 2833418 | 3356182 | 3355475 | 3048286 | 3048993 |
| 3643 | BPSL3431 | 1 | 3010126 | 3010764 | 2908045 | 2908683 | 2923787 | 2924425 | 2996371 | 2997009 | 3242562 | 3241924 | 1667777 | 1667139 | 2936236 | 2936874 | 2832030 | 2832668 | 3356863 | 3356225 | 3047605 | 3048243 |

**Chromosome 2**

|    |          |   |       |       |       |       |       |       |       |       |       |       |         |         |       |      |         |         |         |         |       |       |
|----|----------|---|-------|-------|-------|-------|-------|-------|-------|-------|-------|-------|---------|---------|-------|------|---------|---------|---------|---------|-------|-------|
| 1  | BPSS0001 | 1 | 1139  | 2323  | 10653 | 11837 | 10601 | 11785 | 1092  | 2276  | 9524  | 10708 | 1496454 | 1497638 | 1139  | 2323 | 1780428 | 1779244 | 1165330 | 1166514 | 32271 | 33455 |
| 2  | BPSS0002 | 1 | 3463  | 2423  | 12977 | 11937 | 12925 | 11885 | 3416  | 2376  | 11848 | 10808 | 1498778 | 1497738 | 3463  | 2423 | 1778104 | 1779144 | 1167654 | 1166614 | 34595 | 33555 |
| 3  | BPSS0003 | 1 | 4057  | 3641  | 13571 | 13155 | 13519 | 13103 | 4010  | 3594  | 12442 | 12026 | 1499372 | 1498956 | 4057  | 3641 | 1777510 | 1777926 | 1168248 | 1167832 | 35189 | 34773 |
| 4  | BPSS0004 | 1 | 4694  | 4089  | 14208 | 13603 | 14156 | 13551 | 4647  | 4042  | 13079 | 12474 | 1500009 | 1499404 | 4694  | 4089 | 1776873 | 1777478 | 1168885 | 1168280 | 35826 | 35221 |
| 5  | BPSS0005 | 1 | 4862  | 6058  | 14376 | 15572 | 14324 | 15520 | 4815  | 6011  | 13247 | 14443 | 1500177 | 1501373 | 4862  | 6058 | 1776705 | 1775509 | 1169053 | 1170249 | 35994 | 37190 |
| 6  | BPSS0006 | 1 | 6074  | 7102  | 15588 | 16616 | 15536 | 16564 | 6027  | 7055  | 14459 | 15487 | 1501389 | 1502417 | 6074  | 7102 | 1775493 | 1774465 | 1170265 | 1171293 | 37206 | 38234 |
| 7  | BPSS0007 | 1 | 8093  | 7443  | 17607 | 16957 | 17555 | 16905 | 8046  | 7396  | 16478 | 15828 | 1503408 | 1502758 | 8093  | 7443 | 1773474 | 1774124 | 1172284 | 1171634 | 39225 | 38575 |
| 8  | BPSS0008 | 1 | 8183  | 8797  | 17697 | 18311 | 17645 | 18259 | 8136  | 8750  | 16568 | 17182 | 1503498 | 1504112 | 8183  | 8797 | 1773384 | 1772770 | 1172374 | 1172988 | 39315 | 39929 |
| 9  | BPSS0009 | 1 | 8901  | 9377  | 18415 | 18891 | 18363 | 18839 | 8854  | 9330  | 17286 | 17762 | 1504216 | 1504692 | 8901  | 9377 | 1772666 | 1772190 | 1173092 | 1173568 | 40033 | 40509 |
| 10 | BPSS0010 | 1 | 10618 | 9605  | 20132 | 19119 | 20080 | 19067 | 10571 | 9558  | 19003 | 17990 | 1505933 | 1504920 | 10618 | 9605 | 1770949 | 1771962 | 1174809 | 1173796 | 41750 | 40737 |
| 11 | BPSS0011 | 1 | 12006 | 10924 | 21520 | 20438 | 21468 | 20386 | 11959 | 10877 | 20391 | 19309 | 1507321 | 1506239 | 12006 | 1    |         |         |         |         |       |       |



|    |                 |   |       |       |       |       |       |       |       |       |         |         |         |         |       |       |         |         |         |         |       |       |
|----|-----------------|---|-------|-------|-------|-------|-------|-------|-------|-------|---------|---------|---------|---------|-------|-------|---------|---------|---------|---------|-------|-------|
| 13 | BPSS0013        | 1 | 13578 | 14252 | 23092 | 23766 | 23040 | 23714 | 13531 | 14205 | 22012   | 22686   | 1508935 | 1509609 | 13599 | 14273 | 1767982 | 1767335 | 1177790 | 1178464 | 44738 | 45412 |
| 14 | BPSS0014        | 1 | 14470 | 15090 | 23984 | 24604 | 23932 | 24552 | 14423 | 15043 | 22894   | 23514   | 1509807 | 1510427 | 14471 | 15091 | 1767230 | 1766610 | 1178662 | 1179282 | 45610 | 46230 |
| 15 | BPSS0015        | 1 | 15992 | 15531 | 25506 | 25045 | 25454 | 24993 | 15945 | 15484 | 24416   | 23955   | 1511329 | 1510868 | 15993 | 15532 | 1765708 | 1766169 | 1180184 | 1179723 | 47132 | 46671 |
| 16 | BPSS0016        | 1 | 17244 | 16075 | 26758 | 25589 | 26706 | 25537 | 17197 | 16028 | 25668   | 24499   | 1512581 | 1511412 | 17245 | 16076 | 1764456 | 1765625 | 1181436 | 1180267 | 48384 | 47215 |
| 17 | BPSS0017        | 1 | 18092 | 17310 | 27606 | 26824 | 27554 | 26772 | 18045 | 17263 | 26516   | 25734   | 1513429 | 1512647 | 18093 | 17311 | 1763608 | 1764390 | 1182284 | 1181502 | 49232 | 48450 |
| 18 | BPSS0018        | 1 | 18879 | 18142 | 28393 | 27656 | 28341 | 27604 | 18832 | 18095 | 27303   | 26566   | 1514216 | 1513479 | 18880 | 18143 | 1762821 | 1763558 | 1183071 | 1182334 | 50019 | 49282 |
| 19 | BPSS0019        | 1 | 19338 | 19931 | 28852 | 29445 | 28800 | 29393 | 19291 | 19884 | 27762   | 28355   | 1514675 | 1515268 | 19339 | 19932 | 1762362 | 1761769 | 1183530 | 1184123 | 50478 | 51071 |
| 20 | BPSS0020        | 1 | 20250 | 19960 | 29764 | 29474 | 29712 | 29422 | 20203 | 19913 | 28674   | 28384   | 1515587 | 1515297 | 20251 | 19961 | 1761450 | 1761740 | 1184442 | 1184152 | 51390 | 51100 |
| 21 | BPSS0021        | 1 | 21786 | 20962 | 31300 | 30476 | 31248 | 30424 | 21739 | 20915 | 30210   | 29386   | 1517123 | 1516299 | 21787 | 20963 | 1759914 | 1760738 | 1185978 | 1185154 | 52926 | 52102 |
| 22 | BPSS0022        | 1 | 22533 | 21829 | 32047 | 31343 | 31995 | 31291 | 22486 | 21782 | 30957   | 30253   | 1517870 | 1517166 | 22534 | 21830 | 1759167 | 1759871 | 1186725 | 1186021 | 53673 | 52969 |
| 23 | BPSS0023        | 1 | 22941 | 24344 | 32455 | 33858 | 32403 | 33806 | 22894 | 24297 | 31365   | 32768   | 1518278 | 1519681 | 22942 | 24345 | 1758759 | 1757356 | 1187133 | 1188536 | 54081 | 55484 |
| 24 | BPSS0024        | 1 | 24497 | 24694 | 34011 | 34208 | 33959 | 34156 | 24450 | 24647 | 32921   | 33118   | 1519834 | 1520031 | 24498 | 24695 | 1757203 | 1757006 | 1188689 | 1188886 | 55637 | 55834 |
| 25 | BPSS0025        | 1 | 24871 | 25719 | 34385 | 35233 | 34333 | 35181 | 24824 | 25672 | 33295   | 34143   | 1520208 | 1521056 | 24872 | 25720 | 1756829 | 1755981 | 1189063 | 1189911 | 56011 | 56859 |
| 26 | BPSS0026        | 1 | 25719 | 26549 | 35233 | 36063 | 35181 | 36011 | 25672 | 26502 | 34143   | 34973   | 1521056 | 1521886 | 25720 | 26550 | 1755981 | 1755151 | 1189911 | 1190741 | 56859 | 57689 |
| 27 | BPSS0027        | 1 | 26549 | 28489 | 36063 | 38003 | 36011 | 37951 | 26502 | 28442 | 34973   | 36913   | 1521886 | 1523826 | 26550 | 28490 | 1755151 | 1753211 | 1190741 | 1192681 | 57689 | 59629 |
| 28 | BPSS0028        | 1 | 28506 | 29492 | 38020 | 39006 | 37968 | 38954 | 28459 | 29445 | 36930   | 37916   | 1523843 | 1524829 | 28507 | 29493 | 1753194 | 1752208 | 1192698 | 1193684 | 59646 | 60632 |
| 29 | BPSS0029        | 1 | 30287 | 29670 | 39801 | 39184 | 39749 | 39132 | 30240 | 29623 | 38711   | 38094   | 1525624 | 1525007 | 30288 | 29671 | 1751413 | 1752030 | 1194479 | 1193862 | 61427 | 60810 |
| 30 | BPSS0030        | 1 | 30395 | 31285 | 39909 | 40799 | 39857 | 40747 | 30348 | 31238 | 38819   | 39709   | 1525732 | 1526622 | 30396 | 31286 | 1751305 | 1750877 | 1194587 | 1195477 | 61535 | 62425 |
| 31 | BPSS0031        | 1 | 32090 | 31338 | 41604 | 40852 | 41552 | 40800 | 32043 | 31291 | 40514   | 39762   | 1527427 | 1526675 | 32091 | 31339 | 1749522 | 1750274 | 1196282 | 1195530 | 63230 | 62478 |
| 32 | BPSS0032        | 1 | 32707 | 32243 | 42221 | 41757 | 42169 | 41705 | 32660 | 32196 | 41131   | 40667   | 1528044 | 1527580 | 32708 | 32244 | 1748905 | 1749369 | 1196899 | 1196435 | 63847 | 63383 |
| 33 | BPSS0033        | 1 | 33095 | 33358 | 42609 | 42872 | 42557 | 42820 | 33048 | 33311 | 41519   | 41782   | 1528432 | 1528695 | 33096 | 33359 | 1748517 | 1748254 | 1197287 | 1197550 | 64235 | 64498 |
| 34 | BPSS0034        | 1 | 34127 | 35704 | 43641 | 45218 | 43589 | 45166 | 34080 | 35657 | 42551   | 44128   | 1529464 | 1531041 | 34128 | 35705 | 1747485 | 1745908 | 1198319 | 1199896 | 65267 | 66844 |
| 35 | BPSS0035        | 1 | 35704 | 36651 | 45218 | 46165 | 45166 | 46113 | 35657 | 36604 | 44128   | 45075   | 1531041 | 1531433 | 35705 | 36097 | 1744278 | 1743721 | 1199896 | 1200843 | 66844 | 67791 |
| 36 | Chr2_1_IS407A_B | 1 |       |       |       |       |       |       |       |       |         |         | 1531434 | 1532669 | 36098 | 37333 | 1744280 | 1745515 |         |         |       |       |
| 37 | BPSS0036        | 1 | 37848 | 37435 | 47362 | 46949 | 47310 | 46897 | 37801 | 37388 | 46272   | 45859   | 1534417 | 1534004 | 39137 | 38724 | 1742532 | 1742945 | 1202048 | 1201635 | 68988 | 68575 |
| 38 | BPSS0037        | 1 | 38103 | 38348 | 47617 | 47862 | 47565 | 47810 | 38056 | 38301 | 46527   | 46772   | 1534672 | 1534917 | 39392 | 39637 | 1742277 | 1742032 | 1202303 | 1202548 | 69243 | 69488 |
| 39 | BPSS0038        | 1 | 38475 | 39395 | 47989 | 48909 | 47937 | 48857 | 38428 | 39348 | 46899   | 47819   | 1535044 | 1535964 | 39764 | 40684 | 1741905 | 1740985 | 1202675 | 1203595 | 69615 | 70535 |
| 40 | BPSS0039        | 1 | 40390 | 39590 | 49911 | 49111 | 49859 | 49059 | 40343 | 39543 | 48877   | 48077   | 1537001 | 1536201 | 41770 | 40970 | 1740004 | 1740804 | 1204625 | 1203825 | 71516 | 70716 |
| 41 | BPSS0040        | 1 | 40945 | 40394 | 50466 | 49915 | 50414 | 49863 | 40898 | 40347 | 49432   | 48881   | 1537556 | 1537005 | 42325 | 41774 | 1739449 | 1740000 | 1205180 | 1204629 | 72071 | 71520 |
| 42 | BPSS0041        | 1 | 42183 | 41260 | 51704 | 50781 | 51652 | 50729 | 42136 | 41213 | 50670   | 49747   | 1538794 | 1537871 | 43563 | 42640 | 1738211 | 1739134 | 1206418 | 1205495 | 73309 | 72386 |
| 43 | BPSS0042        | 1 | 42297 | 43517 | 51818 | 53038 | 51766 | 52986 | 42250 | 43470 | 50784   | 52004   | 1538908 | 1540128 | 43677 | 44897 | 1738097 | 1736877 | 1206532 | 1207752 | 73423 | 74643 |
| 44 | BPSS0043        | 1 | 43728 | 44438 | 53249 | 53959 | 53197 | 53907 | 43681 | 44391 | 52215   | 52925   | 1540339 | 1541049 | 45108 | 45818 | 1736666 | 1735956 | 1207963 | 1208673 | 74854 | 75564 |
| 45 | BPSS0044        | 1 | 44460 | 45113 | 53981 | 54634 | 53929 | 54582 | 44413 | 45066 | 52947   | 53600   | 1541071 | 1541724 | 45840 | 46493 | 1735934 | 1735281 | 1208695 | 1209348 | 75586 | 76239 |
| 46 | BPSS0045        | 1 | 45213 | 46607 | 54734 | 56128 | 54682 | 56076 | 45166 | 46560 | 53700   | 55094   | 1541824 | 1543218 | 46593 | 47987 | 1735181 | 1733787 | 1209448 | 1210842 | 76339 | 77733 |
| 47 | BPSS0046        | 1 | 46623 | 47405 | 56144 | 56926 | 56092 | 56874 | 46576 | 47358 | 55110   | 55892   | 1543234 | 1544016 | 48003 | 48785 | 1733771 | 1732989 | 1210858 | 1211640 | 77749 | 78531 |
| 48 | BPSS0047        | 1 | 47424 | 47807 | 56945 | 57328 | 56893 | 57276 | 47377 | 47760 | 55911   | 56294   | 1544035 | 1544418 | 48804 | 49187 | 1732970 | 1732587 | 1211659 | 1212042 | 78550 | 78933 |
| 49 | BPSS0048        | 1 | 47989 | 49341 | 57510 | 58862 | 57458 | 58810 | 47942 | 49294 | 56487   | 57839   | 1544589 | 1545941 | 49358 | 50710 | 1732416 | 1731064 | 1212224 | 1213576 | 79115 | 80467 |
| 50 | BPSS0049        | 1 | 49660 | 49415 | 59181 | 58936 | 59129 | 58884 | 49613 | 49368 | 58158   | 57913   | 1546260 | 1546015 | 51029 | 50784 | 1730745 | 1730990 | 1213895 | 1213650 | 80786 | 80541 |
| 51 | BPSS0050        | 1 | 50378 | 49764 | 59899 | 59285 | 59847 | 59233 | 50331 | 49717 | 58876   | 58262   | 1546978 | 1546364 | 51747 | 51133 | 1730027 | 1730641 | 1214613 | 1213999 | 81504 | 80890 |
| 52 | BPSS0051        | 1 | 51829 | 50576 | 61350 | 60097 | 61298 | 60045 | 51782 | 50529 | 60327   | 59074   | 1548429 | 1547176 | 53198 | 51945 | 1728576 | 1729829 | 1216064 | 1214811 | 82955 | 81702 |
| 53 | BPSS0052        | 1 | 52244 | 51819 | 61765 | 61340 | 61713 | 61288 | 52197 | 51772 | 60742   | 60317   | 1548844 | 1548419 | 53613 | 53188 | 1728161 | 1728586 | 1216479 | 1216054 | 83370 | 82945 |
| 54 | BPSS0053        | 1 | 53836 | 52649 | 63357 | 62170 | 63305 | 62118 | 53789 | 52602 | 62334   | 61147   | 1550436 | 1549249 | 55205 | 54018 | 1726569 | 1727756 | 1218071 | 1216884 | 84962 | 83775 |
| 55 | BPSS0054        | 1 | 54828 | 53836 | 64349 | 63357 | 64297 | 63305 | 54781 | 53789 | 63326   | 62334   | 1551428 | 1550436 | 56197 | 55205 | 1725577 | 1726569 | 1219063 | 1218071 | 85954 | 84962 |
| 56 | BPSS0055        | 1 | 55803 | 56348 | 65324 | 65869 | 65272 | 65817 | 55756 | 56301 | 64289   | 64834   | 1552391 | 1552936 | 57184 | 57729 | 1724602 | 1724057 | 1220002 | 1220547 | 86893 | 87438 |
| 57 | BPSS0056        | 1 | 56404 | 56703 | 65925 | 66224 | 65873 | 66172 | 56357 | 56656 | 64890   | 65189   | 1552992 | 1553291 | 57785 | 58084 | 1724001 | 1723702 | 1220603 | 1220902 | 87494 | 87793 |
| 58 | BPSS0057        | 1 | 56742 | 57407 | 66263 | 66928 | 66211 | 66876 | 56695 | 57360 | 65228   | 65893   | 1553330 | 1553995 | 58123 | 58788 | 1723663 | 1722998 | 1220941 | 1221606 | 87832 | 88497 |
| 59 | BPSS0058        | 1 | 57887 | 63796 | 67408 | 73317 | 67356 | 73265 | 57840 | 63749 | 66373   | 72282   | 1554475 | 1560384 | 59268 | 65177 | 1722518 | 1716609 | 1222086 | 1227995 | 88977 | 94886 |
| 60 | BPSS0059        | 1 | 65093 | 64836 | 74614 | 74357 | 74562 | 74305 | 65046 | 64789 | 73579   | 73322   | 1561681 | 1561424 | 66474 | 66217 | 1715312 | 1715569 | 1229292 | 1229035 | 96183 | 95926 |
| 61 | BPSS0060        | 1 | 65736 | 66005 | 75257 | 75526 | 75205 | 75474 | 65689 | 65958 | 74222   | 74491   | 1562324 | 1562593 | 67117 | 67386 | 1714669 | 1714400 | 1229935 | 1230204 | 96826 | 97095 |
| 62 | BPSS0060A       | 1 | 66195 | 66635 | 75675 | 75860 | 75646 | 75846 | 66148 | 66588 | 74681   | 75046   | 1562783 | 1563223 | 67576 | 68016 | 1714210 | 1713770 | 1230394 | 1230234 | 97285 | 97725 |
| 63 | BPSS0061        | 1 | 67140 | 68489 | 76365 | 77714 | 76698 | 77453 | 67093 | 68442 | 2330556 | 2329207 | 1563716 | 1565065 | 68509 | 69858 | 1713277 | 1712648 | 1231339 | 1231626 | 98230 | 98517 |



|     |                 |         |         |         |         |         |         |         |         |         |         |         |         |         |         |         |         |         |        |         |         |         |
|-----|-----------------|---------|---------|---------|---------|---------|---------|---------|---------|---------|---------|---------|---------|---------|---------|---------|---------|---------|--------|---------|---------|---------|
| 115 | BPSS0111        |         |         |         |         |         |         |         |         |         |         |         |         |         |         |         |         |         |        |         |         |         |
| 116 | BPSS0112        |         |         |         |         |         |         |         |         |         |         |         |         |         |         |         |         |         |        |         |         |         |
| 117 | BPSS0113        |         |         |         |         |         |         |         |         |         |         |         |         |         |         |         |         |         |        |         |         |         |
| 118 | BPSS0114        |         |         |         |         |         |         |         |         |         |         |         |         |         |         |         |         |         |        |         |         |         |
| 119 | BPSS0115        |         |         |         |         |         |         |         |         |         |         |         |         |         |         |         |         |         |        |         |         |         |
| 120 | BPSS0116        |         |         |         |         |         |         |         |         |         |         |         |         |         |         |         |         |         |        |         |         |         |
| 121 | BPSS0117        |         |         |         |         |         |         |         |         |         |         |         |         |         |         |         |         |         |        |         |         |         |
| 122 | BPSS0118        |         |         |         |         |         |         |         |         |         |         |         |         |         |         |         |         |         |        |         |         |         |
| 123 | BPSS0119        |         |         |         |         |         |         |         |         |         |         |         |         |         |         |         |         |         |        |         |         |         |
| 124 | BPSS0120        |         |         |         |         |         |         |         |         |         |         |         |         |         |         |         |         |         |        |         |         |         |
| 125 | BPSS0121        |         |         |         |         |         |         |         |         |         |         |         |         |         |         |         |         |         |        |         |         |         |
| 126 | BPSS0122        |         |         |         |         |         |         |         |         |         |         |         |         |         |         |         |         |         |        |         |         |         |
| 127 | BPSS0123        |         |         |         |         |         |         |         |         |         |         |         |         |         |         |         |         |         |        |         |         |         |
| 128 | BPSS0124        |         |         |         |         |         |         |         |         |         |         |         |         |         |         |         |         |         |        |         |         |         |
| 129 | BPSS0125        |         |         |         |         |         |         |         |         |         |         |         |         |         |         |         |         |         |        |         |         |         |
| 130 | BPSS0126        |         |         |         |         |         |         |         |         |         |         |         |         |         |         |         |         |         |        |         |         |         |
| 131 | BPSS0127        |         |         |         |         |         |         |         |         |         |         |         |         |         |         |         |         |         |        |         |         |         |
| 132 | BPSS0128        |         |         |         |         |         |         |         |         |         |         |         |         |         |         |         |         |         |        |         |         |         |
| 133 | BPSS0129        |         |         |         |         |         |         |         |         |         |         |         |         |         |         |         |         |         |        |         |         |         |
| 134 | BPSS0130        |         |         |         |         |         |         |         |         |         |         |         |         |         |         |         |         |         |        |         |         |         |
| 135 | BPSS0131        |         |         |         |         |         |         |         |         |         |         |         |         |         |         |         |         |         |        |         |         |         |
| 136 | BPSS0132        |         |         |         |         |         |         |         |         |         |         |         |         |         |         |         |         |         |        |         |         |         |
| 137 | BPSS0133        |         |         |         |         |         |         |         |         |         |         |         |         |         |         |         |         |         |        |         |         |         |
| 138 | BPSS0134        |         |         |         |         |         |         |         |         |         |         |         |         |         |         |         |         |         |        |         |         |         |
| 139 | BPSS0135        |         |         |         |         |         |         |         |         |         |         |         |         |         |         |         |         |         |        |         |         |         |
| 140 | BPSS0136        |         |         |         |         |         |         |         |         |         |         |         |         |         |         |         |         |         |        |         |         |         |
| 141 | BPSS0137        |         |         |         |         |         |         |         |         |         |         |         |         |         |         |         |         |         |        |         |         |         |
| 142 | BPSS0138        |         |         |         |         |         |         |         |         |         |         |         |         |         |         |         |         |         |        |         |         |         |
| 143 | BPSS0139        |         |         |         |         |         |         |         |         |         |         |         |         |         |         |         |         |         |        |         |         |         |
| 144 | BPSS0140        |         |         |         |         |         |         |         |         |         |         |         |         |         |         |         |         |         |        |         |         |         |
| 145 | BPSS0141        |         |         |         |         |         |         |         |         |         |         |         |         |         |         |         |         |         |        |         |         |         |
| 146 | BPSS0142        |         |         |         |         |         |         |         |         |         |         |         |         |         |         |         |         |         |        |         |         |         |
| 147 | BPSS0143        |         |         |         |         |         |         |         |         |         |         |         |         |         |         |         |         |         |        |         |         |         |
| 148 | Chr2_3_IS407A_A | 2135943 | 2137178 | 2173035 | 2174270 | 2146619 | 2147854 | 2128166 | 2129401 | 2097872 | 2099107 | 1307203 | 1308438 | 2164773 | 2166008 | 2030650 | 2031885 | 977425  | 978660 | 1972722 | 1973957 |         |
| 149 | BPSS0144        | 2       |         | 2172880 | 2173035 | 2146464 | 2146619 | 2128011 | 2128166 | 2097717 | 2097872 |         |         |         |         |         |         | 977270  | 977425 | 1972567 | 1972722 |         |
| 150 | BPSS0145        | 2       | 2133495 | 2134889 | 2170587 | 2171981 | 2144171 | 2145565 | 2125718 | 2127112 | 2095410 | 2096804 | 1305814 | 1307202 | 2163384 | 2164772 | 2029261 | 2030649 | 974956 | 976350  | 1970260 | 1971654 |
| 151 | BPSS0146        | 2       | 2132672 | 2133298 | 2169764 | 2170390 | 2143348 | 2143974 |         |         | 2094587 | 2095213 | 1304991 | 1305617 | 2162561 | 2163187 | 2028438 | 2029064 | 974133 | 974759  | 1969437 | 1970063 |
| 152 | BPSS0147        | 2       | 2131325 | 2131837 | 2168417 | 2168929 | 2142001 | 2142513 | 2123587 | 2124099 | 2093240 | 2093752 | 1303644 | 1304156 | 2161214 | 2161726 | 2027091 | 2027603 | 972786 | 973298  | 1968090 | 1968602 |
| 153 | BPSS0148        | 2       | 2130094 | 2131281 | 2167186 | 2168373 | 2140770 | 2141957 | 2122356 | 2123543 | 2092009 | 2093196 | 1302413 | 1303600 | 2159983 | 2161170 | 2025860 | 2027047 | 971555 | 972742  | 1966859 | 1968046 |
| 154 | BPSS0149        | 2       | 2129914 | 2129015 | 2167006 | 2166107 | 2140590 | 2139691 | 2122176 | 2121277 | 2091829 | 2090930 | 1302233 | 1301334 | 2159803 | 2158904 | 2025680 | 2024781 | 971375 | 970476  | 1966679 | 1965780 |
| 155 | BPSS0150        | 2       | 2127861 | 2128667 | 2164953 | 2165759 | 2138537 | 2139343 | 2120123 | 2120929 | 2089776 | 2090582 | 1300180 | 1300986 | 2157750 | 2158556 | 2023627 | 2024433 | 969322 | 970128  | 1964626 | 1965432 |
| 156 | BPSS0151        | 2       | 2127666 | 2126503 | 2164758 | 2163595 | 2138342 | 2137179 | 2119928 | 2118765 | 2089572 | 2088409 | 1299976 | 1298813 | 2157537 | 2156374 | 2023432 | 2022269 | 969127 | 967964  | 1964431 | 1963268 |
| 157 | BPSS0152        | 2       | 2125998 | 2125561 | 2163090 | 2162653 | 2136674 | 2136237 | 2118260 | 2117823 |         |         | 1298308 | 1297871 | 2155869 | 2155432 | 2021764 | 2021327 | 967469 | 967032  | 1962773 | 1962336 |
| 158 | BPSS0153        | 2       | 2124053 | 2124949 | 2161145 | 2162041 | 2134729 | 2135625 | 2116315 | 2117211 | 2086049 | 2086945 | 1296350 | 1297246 | 2153937 | 2154833 | 2019812 | 2020708 | 965505 | 966401  | 1960784 | 1961680 |
| 159 | BPSS0154        | 2       | 2122642 | 2123886 | 2159734 | 2160978 | 2133318 | 2134562 | 2114904 | 2116148 | 2084638 | 2085882 | 1294939 | 1296183 | 2152526 | 2153770 | 2018401 | 2019645 | 964094 | 965338  | 1959373 | 1960617 |
| 160 | BPSS0155        | 2       | 2121557 | 2122486 | 2158649 | 2159578 | 2132233 | 2133162 | 2113819 | 2114748 | 2083553 | 2084482 | 1293854 | 1294783 | 2151441 | 2152370 | 2017316 | 2018245 | 963009 | 963938  | 1958288 | 1959217 |
| 161 | BPSS0156        | 2       | 2120251 | 2121009 | 2157343 | 2158101 | 2130927 | 2131685 | 2112513 | 2113271 | 2082247 | 2083005 | 1292548 | 1293306 | 2150135 | 2150893 | 2016010 | 2016768 | 961703 | 962461  | 1956982 | 1957740 |
| 162 | BPSS0157        | 2       | 2119882 | 2119466 | 2156974 | 2156558 | 2130558 | 2130142 | 2112144 | 2111728 | 2081878 | 2081462 | 1292179 | 1291763 | 2149766 | 2149350 | 2015641 | 2015225 | 961334 | 960918  | 1956613 | 1956197 |
| 163 | BPSS0158        | 2       | 2119021 | 2117108 | 2156113 | 2154200 | 2129697 | 2127784 | 2111283 | 2109370 | 2081017 | 2079104 | 1291318 | 1289405 | 2148905 | 2146992 | 2014780 | 2012867 | 960473 | 958560  | 1955752 | 1953839 |
| 164 | BPSS0159        | 2       | 2116830 | 2113936 | 2153922 | 2151028 | 2127506 | 2124612 | 2109092 | 2106198 | 2078826 | 2075932 | 1289127 | 1286233 | 2146714 | 2143820 | 2012589 | 2009695 | 958282 | 955388  | 1953561 | 1950667 |
| 165 | Chr2_4_ISBma1_B | 2       |         |         |         |         |         |         |         |         |         |         | 1284442 | 1285746 | 2142029 | 2143333 | 2007904 | 2009208 |        |         |         |         |

|     |          |   |         |         |         |         |         |         |         |         |         |         |         |         |         |         |         |         |        |        |         |         |
|-----|----------|---|---------|---------|---------|---------|---------|---------|---------|---------|---------|---------|---------|---------|---------|---------|---------|---------|--------|--------|---------|---------|
| 166 | BPSS0160 | 2 | 2113331 | 2112276 | 2150423 | 2149368 | 2124007 | 2122952 | 2105593 | 2104538 | 2075327 | 2074272 | 1284315 | 1283260 | 2141902 | 2140847 | 2007777 | 2006722 | 954783 | 953728 | 1950062 | 1949007 |
| 167 | BPSS0161 | 2 | 2112276 | 2111383 | 2149368 | 2148475 | 2122952 | 2122059 | 2104538 | 2103645 | 2074272 | 2073379 | 1283260 | 1282367 | 2140847 | 2139954 | 2006722 | 2005829 | 953728 | 952835 | 1949007 | 1948114 |
| 168 | BPSS0162 | 2 | 2111372 | 2109870 | 2148464 | 2146962 | 2122048 | 2120546 | 2103634 | 2102132 | 2073368 | 2071866 | 1282356 | 1280854 | 2139943 | 2138441 | 2005818 | 2004316 | 952824 | 951322 | 1948103 | 1946601 |
| 169 | BPSS0163 | 2 | 2109821 | 2107956 | 2146913 | 2145048 | 2120497 | 2118632 | 2102083 | 2100218 | 2071817 | 2069952 | 1280805 | 1278940 | 2138392 | 2136527 | 2004267 | 2002402 | 951273 | 949408 | 1946552 | 1944687 |
| 170 | BPSS0164 | 2 | 2107924 | 2106956 | 2145016 | 2144048 | 2118600 | 2117632 | 2100186 | 2099218 | 2069920 | 2068952 | 1278908 | 1277940 | 2136495 | 2135527 | 2002370 | 2001402 | 949376 | 948408 | 1944655 | 1943687 |
| 171 | BPSS0165 | 2 | 2106898 | 2105975 | 2143990 | 2143067 | 2117574 | 2116651 | 2099160 | 2098237 | 2068894 | 2067971 | 1277882 | 1276959 | 2135469 | 2134546 | 2001344 | 2000421 | 948350 | 947427 | 1943629 | 1942706 |
| 172 | BPSS0166 | 2 | 2104767 | 2105726 | 2141859 | 2142818 | 2115443 | 2116402 | 2097029 | 2097988 | 2066763 | 2067722 | 1275751 | 1276710 | 2133338 | 2134297 | 1999213 | 2000172 | 946219 | 947178 | 1941498 | 1942457 |
| 173 | BPSS0167 | 2 | 2101988 | 2103544 | 2136564 | 2139191 | 2109594 | 2110364 | 2091734 | 2094361 | 2061468 | 2064095 | 1270456 | 1273083 | 2128043 | 2130670 | 1993918 | 1996545 | 940924 | 943551 | 1936203 | 1938830 |
| 174 | BPSS0168 | 2 | 2098178 | 2099440 | 2135270 | 2136532 | 2108300 | 2109562 | 2090440 | 2091702 | 2060174 | 2061436 | 1269162 | 1270424 | 2126749 | 2128011 | 1992624 | 1993886 | 939630 | 940892 | 1934909 | 1936171 |
| 175 | BPSS0169 | 2 | 2096743 | 2098086 | 2133835 | 2135178 | 2106865 | 2108208 | 2089005 | 2090348 | 2058739 | 2060082 | 1267727 | 1269070 | 2125314 | 2126657 | 1991189 | 1992532 | 938195 | 939538 | 1933474 | 1934817 |
| 176 | BPSS0170 | 2 | 2096209 | 2096718 | 2133301 | 2133810 | 2106331 | 2106840 | 2088471 | 2088980 | 2058205 | 2058714 | 1267193 | 1267702 | 2124780 | 2125289 | 1990655 | 1991164 | 937661 | 938170 | 1932940 | 1933449 |
| 177 | BPSS0171 | 2 | 2095626 | 2096108 | 2132718 | 2133200 | 2105748 | 2106230 | 2087888 | 2088370 | 2057622 | 2058104 | 1266610 | 1267092 | 2124197 | 2124679 | 1990072 | 1990554 | 937078 | 937560 | 1932357 | 1932839 |
| 178 | BPSS0172 | 2 | 2094010 | 2095506 | 2131102 | 2132598 | 2104132 | 2105628 | 2086272 | 2087768 | 2056006 | 2057502 | 1264994 | 1266490 | 2122581 | 2124077 | 1988456 | 1989952 | 935462 | 936958 | 1930741 | 1932237 |
| 179 | BPSS0173 | 2 | 2093394 | 2093972 | 2130486 | 2131064 | 2103516 | 2104094 | 2085656 | 2086234 | 2055390 | 2055968 | 1264378 | 1264956 | 2121965 | 2122543 | 1987840 | 1988418 | 934846 | 935424 | 1930125 | 1930703 |
| 180 | BPSS0174 | 2 | 2090435 | 2091040 | 2127527 | 2128132 | 2100557 | 2101162 | 2082697 | 2083302 | 2052431 | 2053036 | 1261419 | 1262024 | 2119006 | 2119611 | 1984881 | 1985486 | 931887 | 932492 | 1927166 | 1927771 |
| 181 | BPSS0175 | 2 | 2089902 | 2089186 | 2126994 | 2126278 | 2100024 | 2099308 | 2082164 | 2081448 | 2051898 | 2051182 | 1260886 | 1260170 | 2118473 | 2117757 | 1984348 | 1983632 | 931354 | 930638 | 1926633 | 1925917 |
| 182 | BPSS0176 | 2 | 2089186 | 2088224 | 2126278 | 2125316 | 2099308 | 2098346 | 2081448 | 2080486 | 2051182 | 2050220 | 1260170 | 1259208 | 2117757 | 2116795 | 1983632 | 1982670 | 930638 | 929676 | 1925917 | 1924955 |
| 183 | BPSS0177 | 2 | 2088180 | 2087656 | 2125272 | 2124748 | 2098302 | 2097778 | 2080442 | 2079918 | 2050176 | 2049652 | 1259164 | 1258640 | 2116751 | 2116227 | 1982626 | 1982102 | 929632 | 929108 | 1924911 | 1924387 |
| 184 | BPSS0178 | 2 | 2087622 | 2085736 | 2124714 | 2122828 | 2097744 | 2095858 | 2079884 | 2077998 | 2049618 | 2047732 | 1258606 | 1256720 | 2116193 | 2114307 | 1982068 | 1980182 | 929074 | 927188 | 1924353 | 1923467 |
| 185 | BPSS0179 | 2 | 2085686 | 2084652 | 2122813 | 2121743 | 2095843 | 2094773 | 2077983 | 2076913 | 2047717 | 2046647 | 1256705 | 1255635 | 2114292 | 2113222 | 1980167 | 1979097 | 927173 | 926103 | 1922452 | 1921382 |
| 186 | BPSS0180 | 2 | 2084652 | 2083552 | 2121743 | 2120643 | 2094773 | 2093673 | 2076913 | 2075813 | 2046647 | 2045547 | 1255635 | 1254535 | 2113222 | 2112122 | 1979097 | 1977997 | 926103 | 925003 | 1921382 | 1920282 |
| 187 | BPSS0181 | 2 | 2083477 | 2081153 | 2120568 | 2118244 | 2093598 | 2091274 | 2075738 | 2073414 | 2045472 | 2043148 | 1254460 | 1252136 | 2112047 | 2109723 | 1977922 | 1975598 | 924928 | 922604 | 1920207 | 1917883 |
| 188 | BPSS0182 | 2 | 2081118 | 2078644 | 2118209 | 2115735 | 2091239 | 2088765 | 2073379 | 2070905 | 2043113 | 2040639 | 1252101 | 1249627 | 2109688 | 2107214 | 1975563 | 1973089 | 922569 | 920095 | 1917848 | 1915374 |
| 189 | BPSS0183 | 2 | 2078644 | 2077565 | 2115735 | 2114656 | 2088765 | 2087686 | 2070905 | 2069826 | 2040639 | 2039560 | 1249627 | 1248548 | 2107214 | 2106135 | 1973089 | 1972010 | 920095 | 919016 | 1915374 | 1914295 |
| 190 | BPSS0184 | 2 | 2077380 | 2076724 | 2114471 | 2113815 | 2087501 | 2086845 | 2069641 | 2068985 | 2039375 | 2038719 | 1248363 | 1247707 | 2105950 | 2105294 | 1971825 | 1971169 | 918831 | 918175 | 1914110 | 1913454 |
| 191 | BPSS0185 | 2 | 2076674 | 2076303 | 2113765 | 2113394 | 2086795 | 2086424 | 2068935 | 2068564 | 2038669 | 2038298 | 1247657 | 1247286 | 2105244 | 2104873 | 1971119 | 1970748 | 918125 | 917754 | 1913404 | 1913033 |
| 192 | BPSS0186 | 2 | 2075364 | 2075577 | 2110755 | 2112668 | 2083785 | 2085698 | 2065925 | 2067838 | 2035671 | 2037584 | 1244641 | 1246554 | 2102246 | 2104159 | 1968121 | 1970034 | 915133 | 917046 | 1910412 | 1912325 |
| 193 | BPSS0187 | 2 | 2072431 | 2073321 | 2109522 | 2110412 | 2082552 | 2083442 | 2064692 | 2065582 | 2034438 | 2035328 | 1243408 | 1244298 | 2101013 | 2101903 | 1966888 | 1967778 | 913900 | 914790 | 1909179 | 1910069 |
| 194 | BPSS0188 | 2 | 2072335 | 2071562 | 2109426 | 2108653 | 2082456 | 2081683 | 2064596 | 2063823 | 2034342 | 2033569 | 1243312 | 1242539 | 2100917 | 2100144 | 1966792 | 1966019 | 913804 | 913031 | 1909083 | 1908310 |
| 195 | BPSS0189 | 2 | 2071533 | 2071096 | 2108624 | 2108187 | 2081654 | 2081217 | 2063794 | 2063357 | 2033540 | 2033103 | 1242510 | 1242073 | 2100115 | 2099678 | 1965990 | 1965553 | 913002 | 912565 | 1908281 | 1907844 |
| 196 | BPSS0190 | 2 | 2069264 | 2070556 | 2106355 | 2107647 | 2079385 | 2080677 | 2061525 | 2062817 | 2031271 | 2032563 | 1240241 | 1241533 | 2097846 | 2099138 | 1963721 | 1965013 | 910733 | 912025 | 1906012 | 1907304 |
| 197 | BPSS0191 | 2 | 2068590 | 2068979 | 2105681 | 2106070 | 2078711 | 2079100 | 2060851 | 2061240 | 2030597 | 2030986 | 1239567 | 1239956 | 2097172 | 2097561 | 1963047 | 1963436 | 910059 | 910448 | 1905338 | 1905727 |
| 198 | BPSS0192 | 2 | 2067409 | 2068251 | 2104500 | 2105342 | 2077530 | 2078372 | 2059670 | 2060512 | 2029416 | 2030258 | 1238386 | 1239228 | 2095991 | 2096833 | 1961866 | 1962708 | 908878 | 909720 | 1904157 | 1904999 |
| 199 | BPSS0193 | 2 | 2065360 | 2066712 | 2102451 | 2103803 | 2075481 | 2076833 | 2057621 | 2058973 | 2027367 | 2028719 | 1236344 | 1237696 | 2093942 | 2095294 | 1959817 | 1961169 | 906829 | 908181 | 1902108 | 1903460 |
| 200 | BPSS0194 | 2 | 2064169 | 2065170 | 2101260 | 2102261 | 2074290 | 2075291 | 2056430 | 2057431 | 2026176 | 2027177 | 1235153 | 1236154 | 2092751 | 2093752 | 1958626 | 1959627 | 905638 | 906639 | 1900917 | 1901918 |
| 201 | BPSS0195 | 2 | 2063304 | 2064176 | 2100395 | 2101267 | 2073425 | 2074297 | 2055565 | 2056437 | 2025311 | 2026183 | 1234288 | 1235160 | 2091886 | 2092758 | 1957761 | 1958633 | 904773 | 905645 | 1900052 | 1900924 |
| 202 | BPSS0196 | 2 | 2061862 | 2063304 | 2098953 | 2100395 | 2071983 | 2073425 | 2054123 | 2055565 | 2023869 | 2025311 | 1232846 | 1234288 | 2090444 | 2091886 | 1956319 | 1957761 | 903331 | 904773 | 1898610 | 1900052 |
| 203 | BPSS0197 | 2 | 2061590 | 2061853 | 2098681 | 2098944 | 2071711 | 2071974 | 2053851 | 2054114 | 2023597 | 2023860 | 1232574 | 1232837 | 2090172 | 2090435 | 1956047 | 1956310 | 903059 | 903322 | 1898338 | 1898601 |
| 204 | BPSS0198 | 2 | 2060800 | 2061597 | 2097891 | 2098688 | 2070921 | 2071178 | 2053061 | 2053858 | 2022807 | 2023604 | 1231784 | 1232581 | 2089382 | 2090179 | 1955257 | 1956054 | 902269 | 903066 | 1897548 | 1898345 |
| 205 | BPSS0199 | 2 | 2060532 | 2059621 | 2097623 | 2096712 | 2070653 | 2069742 | 2052793 | 2051882 | 2022539 | 2021628 | 1231516 | 1230605 | 2089114 | 2088203 | 1954989 | 1954078 | 902001 | 901090 | 1897280 | 1896369 |
| 206 | BPSS0200 | 2 | 2058812 | 2056302 | 2095903 | 2093393 | 2068933 | 2066423 | 2051073 | 2048563 | 2020839 | 2018329 | 1229852 | 1227342 | 2087492 | 2084982 | 1953188 | 1950678 | 900343 | 897833 | 1895469 | 1892959 |
| 207 | BPSS0201 | 2 | 2055912 | 2054977 | 2093003 | 2092068 | 2066033 | 2065098 | 2048173 | 2047238 | 2017939 | 2017004 | 1226952 | 1226107 | 2084592 | 2083657 | 1950288 | 1949353 | 897443 | 896508 | 1892569 | 1891634 |
| 208 | BPSS0202 | 2 | 2054813 | 2053923 | 2091904 | 2091014 | 2064934 | 2064044 | 2047074 | 2046184 | 2016840 | 2015950 | 1225853 | 1224963 | 2083493 | 2082603 | 1949189 | 1948299 | 896344 | 895454 | 1891470 | 1890580 |
| 209 | BPSS0203 | 2 | 2051815 | 2053824 | 2088906 | 2090915 | 2061936 | 2063945 | 2044076 | 2046085 | 2013842 | 2015851 | 1222855 | 1224864 | 2080495 | 2082504 | 1946191 | 1948200 | 893346 | 895355 | 1888472 | 1890481 |
| 210 | BPSS0204 | 2 | 2049207 | 2050832 | 2086298 | 2087923 | 2059328 | 2060953 | 2041475 | 2043100 | 2011227 | 2012852 | 1220163 | 1221788 | 2077894 | 2079519 | 1943527 | 1945152 | 890745 | 892370 | 1885934 | 1887559 |
| 211 | BPSS0205 | 2 | 2046773 | 2048854 | 2083864 | 2085945 | 2056894 | 2058975 | 2039041 | 2041122 | 2008793 | 2010874 | 1217729 | 1219810 | 2075460 | 2077541 | 1941093 | 1943174 | 888311 | 890392 | 1883500 | 1885581 |
| 212 | BPSS0206 |   |         |         |         |         |         |         |         |         |         |         |         |         |         |         |         |         |        |        |         |         |

|     |                                         |   |         |          |         |         |         |         |         |         |         |         |         |         |         |          |         |         |        |        |         |         |
|-----|-----------------------------------------|---|---------|----------|---------|---------|---------|---------|---------|---------|---------|---------|---------|---------|---------|----------|---------|---------|--------|--------|---------|---------|
| 217 | BPSS0211                                | 2 | 2038255 | 2038067  | 2075040 | 2074852 | 2048377 | 2048189 | 2030509 | 2030321 | 2000528 | 2000340 | 1209625 | 1209437 | 2067237 | 2067049  | 1933234 | 1933046 | 880193 | 880005 | 1875315 | 1875127 |
| 218 | BPSS0212                                | 2 | 2037971 | 2037336  | 2074756 | 2074121 | 2048093 | 2047458 | 2030225 | 2029590 | 2000244 | 1999609 | 1209341 | 1208706 | 2066953 | 2066318  | 1932950 | 1932315 | 879909 | 879274 | 1875031 | 1874396 |
| 219 | BPSS0213                                | 2 | 2037280 | 2036693  | 2074065 | 2073478 | 2047402 | 2046815 | 2029534 | 2028947 | 1999553 | 1999966 | 1208650 | 1208063 | 2066262 | 2065675  | 1932259 | 1931672 | 879218 | 878631 | 1874340 | 1873753 |
| 220 | BPSS0214                                | 2 | 2036611 | 2035139  | 2073396 | 2071924 | 2046733 | 2045261 | 2028865 | 2027393 | 1998884 | 1997412 | 1207981 | 1206509 | 2065593 | 2064121  | 1931590 | 1930118 | 878549 | 877077 | 1873671 | 1872199 |
| 221 | BPSS0215                                | 2 | 2034964 | 2033354  | 2071749 | 2070142 | 2045086 | 2043476 | 2027218 | 2025608 | 1997237 | 1995627 | 1206334 | 1204724 | 2063946 | 2062336  | 1929943 | 1928333 | 876902 | 875292 | 1872024 | 1870414 |
| 222 | BPSS0216                                | 2 | 2031526 | 2032062  | 2068309 | 2068845 | 2041648 | 2042184 | 2023780 | 2024316 | 1993799 | 1994335 | 1202896 | 1203432 | 2060508 | 2061044  | 1926505 | 1927041 | 873464 | 874000 | 1868586 | 1869122 |
| 223 | BPSS0217                                | 2 | 2031397 | 2030534  | 2068180 | 2067317 | 2041519 | 2040656 | 2023651 | 2022788 | 1993670 | 1992807 | 1202767 | 1201904 | 2060379 | 2059516  | 1926376 | 1925513 | 873335 | 872472 | 1868457 | 1867594 |
| 224 | BPSS0218                                | 2 | 2029345 | 2030445  | 2066128 | 2067228 | 2039467 | 2040567 | 2021599 | 2022699 | 1991618 | 1992718 | 1200715 | 1201815 | 2058327 | 2059427  | 1924324 | 1925424 | 871283 | 872383 | 1866714 | 1867364 |
| 225 | BPSS0219                                | 2 | 2029233 | 2028541  | 2066016 | 2065324 | 2039355 | 2038663 | 2021487 | 2020795 | 1991506 | 1990814 | 1200603 | 1199911 | 2058215 | 2057523  | 1924212 | 1923520 | 871171 | 870479 | 1866602 | 1865910 |
| 226 | BPSS0220                                | 2 | 2028218 | 2026971  | 2064658 | 2063780 | 2038340 | 2037093 | 2020472 | 2019225 | 1990491 | 1989244 | 1199588 | 1198341 | 2057200 | 2055947  | 1923197 | 1921938 | 870156 | 868897 | 1865587 | 1865351 |
| 227 | BPSS0221                                | 2 | 2026771 | 2026619  | 2063580 | 2063428 | 2036893 | 2036741 | 2019025 | 2018873 | 1989044 | 1988892 | 1198141 | 1197989 | 2055747 | 2055595  | 1921738 | 1921586 | 868697 | 868545 | 1864328 | 1864176 |
| 228 | BPSS0222                                | 2 | 2025611 | 2025144  | 2062420 | 2061953 | 2035733 | 2035266 | 2017865 | 2017398 | 1987884 | 1987417 | 1196981 | 1196514 | 2054587 | 2054120  | 1920578 | 1920111 | 867537 | 867070 | 1863168 | 1862701 |
| 229 | BPSS0223                                | 2 | 2024495 | 2024935  | 2061304 | 2061744 | 2034617 | 2035057 | 2016749 | 2017189 | 1986768 | 1987208 | 1195865 | 1196305 | 2053471 | 2053911  | 1919462 | 1919902 | 866421 | 866861 | 1862052 | 1862492 |
| 230 | BPSS0224                                | 2 | 2020864 | 2021793  | 2057673 | 2058602 | 2030986 | 2031915 | 2013118 | 2014047 | 1983151 | 1984080 | 1192227 | 1193156 | 2049835 | 2050764  | 1915866 | 1916795 | 862804 | 863733 | 1858428 | 1859357 |
| 231 | BPSS0225                                | 2 | 2020260 | 20219436 | 2057069 | 2056245 | 2030382 | 2029558 | 2012514 | 2011690 | 1982517 | 1981693 | 1191611 | 1190787 | 2049255 | 2048431  | 1915250 | 1914426 | 862158 | 861334 | 1857758 | 1857531 |
| 232 | BPSS0226                                | 2 | 2018659 | 2017241  | 2055317 | 2053899 | 2027978 | 2026560 | 2010882 | 2009464 | 1980801 | 1979383 | 1190010 | 1188592 | 2047654 | 2046236  | 1913622 | 1912204 | 860557 | 859139 | 1856156 | 1854738 |
| 233 | BPSS0227                                | 2 | 2017083 | 2013163  | 2053741 | 2049821 | 2026402 | 2025149 | 2009306 | 2007690 | 1979225 | 1975305 | 1188434 | 1184514 | 2046078 | 2042158  | 1912046 | 1908126 | 858981 | 855061 | 1854580 | 1851992 |
| 234 | BPSS0228                                | 2 | 2012771 | 2013031  | 2049429 | 2049689 | 2021811 | 2022071 | 2005088 | 2005348 | 1974913 | 1975173 | 1184122 | 1184382 | 2041766 | 2042026  | 1907734 | 1907994 | 854669 | 854929 |         |         |
| 235 | BPSS0229                                | 2 | 2010784 | 2012442  | 2047442 | 2049100 | 2019824 | 2021482 | 2003101 | 2004759 | 1972926 | 1974584 | 1182135 | 1183793 | 2039779 | 2041437  | 1905747 | 1907405 | 852682 | 854340 | 1848532 | 1850190 |
| 236 | BPSS0230                                | 2 | 2009811 | 2010200  | 2046252 | 2046641 | 2018851 | 2019240 | 2002128 | 2002517 | 1971953 | 1972342 | 1181162 | 1181551 | 2038806 | 2039195  | 1904774 | 1905163 | 851709 | 852098 | 1847559 | 1847948 |
| 237 | BPSS0231                                | 2 | 2009402 | 2009683  | 2045843 | 2046124 | 2018442 | 2018723 | 2001719 | 2002000 | 1971544 | 1971825 | 1180753 | 1181034 | 2038397 | 2038678  | 1904365 | 1904646 | 851300 | 851581 | 1847150 | 1847431 |
| 238 | BPSS0232                                | 2 | 2009233 | 2008166  | 2045674 | 2044607 | 2018273 | 2017206 | 2001550 | 2000483 | 1971375 | 1970308 | 1180584 | 1179517 | 2038228 | 2037161  | 1904196 | 1903129 | 851131 | 850064 | 1846981 | 1845914 |
| 239 | BPSS0233_LysR-family regulatory protein | 2 |         |          |         |         |         |         |         |         |         |         |         |         |         |          |         |         |        |        |         |         |
| 240 | BPSS0233a                               | 2 | 2007310 | 2007119  | 2043751 | 2043560 | 2016350 | 2016159 | 1999627 | 1999436 | 1969452 | 1969261 | 1178661 | 1178470 | 2036305 | 2036114  | 1902273 | 1902082 | 849208 | 849017 | 1845058 | 1844867 |
| 241 | BPSS0234                                | 2 | 2005626 | 2006630  | 2042067 | 2043071 | 2014666 | 2015670 | 1997943 | 1998947 | 1967768 | 1968772 | 1176977 | 1177981 | 2034621 | 2035625  | 1900589 | 1901593 | 847524 | 848528 | 1843374 | 1844378 |
| 242 | BPSS0235                                | 2 | 2004178 | 2005587  | 2040619 | 2042028 | 2013218 | 2014627 | 1996495 | 1997904 | 1966320 | 1967729 | 1175529 | 1176938 | 2033173 | 2034582  | 1899141 | 1900550 | 846076 | 847485 | 1841926 | 1843335 |
| 243 | BPSS0236                                | 2 | 2003582 | 2002572  | 2039938 | 2038928 | 2011789 | 2010779 | 1995899 | 1994889 | 1965723 | 1964713 | 1174933 | 1173923 | 2032578 | 2031568  | 1898545 | 1897535 | 845480 | 844470 | 1841322 | 1840312 |
| 244 | BPSS0237                                | 2 | 2001623 | 2002597  | 2037979 | 2038953 | 2009830 | 2010804 | 1993940 | 1994914 | 1963780 | 1964688 | 1172974 | 1173948 | 2030619 | 2031593  | 1896586 | 1897560 | 843539 | 844495 | 1839381 | 1840337 |
| 245 | BPSS0238                                | 2 | 2001467 | 1999308  | 2037823 | 2035871 | 2009674 | 2007515 | 1993784 | 1991625 | 1963624 | 1961465 | 1172818 | 1170659 | 2030463 | 2028613  | 1896430 | 1894580 | 843383 | 841224 | 1839225 | 1837066 |
| 246 | BPSS0239                                | 2 | 1999292 | 1998687  | 2035515 | 2034910 | 2007499 | 2006894 | 1991609 | 1991004 | 1961449 | 1960844 | 1170643 | 1170038 | 2028263 | 2027658  | 1894230 | 1893625 | 841208 | 840603 | 1837050 | 1836445 |
| 247 | BPSS0240                                | 2 | 1997817 | 1998632  | 2034040 | 2034855 | 2006024 | 2006839 | 1990134 | 1990949 | 1959974 | 1960789 | 1169168 | 1169983 | 2026788 | 2027603  | 1892755 | 1893570 | 839733 | 840548 | 1835575 | 1836390 |
| 248 | BPSS0241                                | 2 | 1996289 | 1997407  | 2032512 | 2033630 | 2004496 | 2005614 | 1988606 | 1989724 | 1958410 | 1959528 | 1167526 | 1168644 |         |          | 1891239 | 1892357 | 838202 | 839320 | 1834026 | 1835144 |
| 249 | BPSS0242                                | 2 | 1995094 | 1996017  | 2031317 | 2032240 | 2003301 | 2004224 | 1987411 | 1988334 | 1957224 | 1958147 | 1166322 | 1167245 | 2024080 | 2025003  | 1889990 | 1890913 | 837016 | 837939 | 1832840 | 1833763 |
| 250 | BPSS0243                                | 2 | 1993946 | 1995094  | 2030169 | 2031317 | 2002153 | 2003301 | 1986263 | 1987411 | 1956706 | 1957224 | 1165174 | 1166322 | 2022932 | 2024080  | 1888842 | 1889990 | 835868 | 837016 | 1831692 | 1832840 |
| 251 | BPSS0244                                | 2 | 1991586 | 1993886  | 2027809 | 2030109 | 1999793 | 2002093 | 1983903 | 1986203 | 1953716 | 1956016 | 1162814 | 1165114 | 2020572 | 2022872  | 1886482 | 1888782 | 833508 | 835808 | 1829332 | 1831632 |
| 252 | BPSS0245                                | 2 | 1990883 | 1991107  | 2027106 | 2027330 | 1999090 | 1999314 | 1983200 | 1983424 | 1953013 | 1953237 | 1162111 | 1162335 | 2019869 | 2020093  | 1885779 | 1886003 | 832805 | 833029 | 1828629 | 1828853 |
| 253 | BPSS0246                                | 2 | 1989825 | 1990718  | 2026048 | 2026941 | 1998032 | 1998925 | 1982142 | 1983035 | 1951955 | 1952848 | 1161053 | 1161946 | 2018811 | 2019704  | 1884721 | 1885614 | 831747 | 832640 | 1827571 | 1828464 |
| 254 | BPSS0247                                | 2 | 1989658 | 1988813  | 2025881 | 2025036 | 1997865 | 1997020 | 1981975 | 1981130 | 1951788 | 1950943 | 1160886 | 1160041 | 2018644 | 2017799  | 1884554 | 1883709 | 831580 | 830735 | 1827404 | 1826559 |
| 255 | BPSS0248                                | 2 | 1988805 | 1987765  | 2025028 | 2023988 | 1997012 | 1995972 | 1981122 | 1980082 | 1950935 | 1949895 | 1160033 | 1158993 | 2017791 | 2016751  | 1883701 | 1882661 | 830727 | 829687 | 1826551 | 1825511 |
| 256 | BPSS0249                                | 2 | 1987735 | 1986650  | 2023958 | 2022873 | 1995942 | 1994857 | 1980052 | 1978967 | 1949865 | 1948780 | 1158963 | 1157878 | 2016721 | 2015636  | 1882631 | 1881546 | 829657 | 828572 | 1825481 | 1824396 |
| 257 | BPSS0250                                | 2 | 1986657 | 1985812  | 2022880 | 2022035 | 1994864 | 1994019 | 1978974 | 1978129 | 1948787 | 1947942 | 1157885 | 1157040 | 2015643 | 2014798  | 1881553 | 1880708 | 828579 | 827734 | 1824403 | 1823558 |
| 258 | BPSS0251                                | 2 | 1985795 | 1985286  | 2022018 | 2021509 | 1994002 | 1993493 | 1978112 | 1977603 | 1947925 | 1947416 | 1157023 | 1156514 | 2014781 | 2014272  | 1880691 | 1880182 | 827717 | 827208 | 1823541 | 1823032 |
| 259 | BPSS0252                                | 2 | 1985216 | 1984020  | 2021439 | 2020243 | 1993423 | 1992227 | 1977533 | 1976337 | 1947346 | 1946150 | 1156444 | 1155248 | 2014202 | 2013006  | 1880112 | 1878916 | 827138 | 825942 | 1822962 | 1821766 |
| 260 | BPSS0253                                | 2 | 1982999 | 1983958  | 2019222 | 2020181 | 1991206 | 1992165 | 1975316 | 1976275 | 1945129 | 1946088 | 1154227 | 1155186 | 2011985 | 2012944  | 1877895 | 1878854 | 824921 | 825880 | 1820745 | 1821704 |
| 261 | BPSS0254                                | 2 | 1982470 | 1982961  | 2018693 | 2019184 | 1990677 | 1991168 | 1974787 | 1975278 | 1944600 | 1945091 | 1153698 | 1154189 | 2011456 | 20111947 | 1877366 | 1877857 | 824392 | 824883 | 1820216 | 1820707 |
| 262 | BPSS0255                                | 2 | 1982231 | 1980717  | 2018454 | 2016940 | 1990438 | 1988924 | 1974548 | 1973034 | 1944361 | 1942847 | 1153459 | 1151945 | 2011217 | 2009703  | 1877127 | 1875613 | 824153 | 822639 | 1819977 | 1818463 |
| 263 | BPSS0256                                | 2 | 1980705 | 1980004  | 2016928 | 2016227 | 1988912 | 1988211 | 1973022 | 1972321 | 1942835 | 1942134 | 1151933 | 1151232 | 2009691 | 2008990  | 1       |         |        |        |         |         |



|     |                                         |   |         |         |         |         |         |         |         |         |         |         |         |         |         |         |         |         |        |        |         |         |
|-----|-----------------------------------------|---|---------|---------|---------|---------|---------|---------|---------|---------|---------|---------|---------|---------|---------|---------|---------|---------|--------|--------|---------|---------|
| 268 | BPSS0261                                | 2 | 1975760 | 1975104 | 2011983 | 2011327 | 1983967 | 1983311 | 1968077 | 1967421 | 1937890 | 1937234 | 1146988 | 1146332 | 2004746 | 2004090 | 1870645 | 1869989 | 817682 | 817026 | 1813506 | 1812850 |
| 269 | BPSS0262                                | 2 | 1974594 | 1975064 | 2010817 | 2011287 | 1982801 | 1983271 | 1966911 | 1967381 | 1936724 | 1937194 | 1145822 | 1146292 | 2003580 | 2004050 | 1869479 | 1869949 | 816516 | 816986 | 1812340 | 1812810 |
| 270 | BPSS0263                                | 2 | 1974142 | 1974594 | 2010365 | 2010817 | 1982349 | 1982801 | 1966459 | 1966911 | 1936272 | 1936724 | 1145370 | 1145822 | 2003128 | 2003580 | 1869027 | 1869479 | 816064 | 816516 | 1811888 | 1812340 |
| 271 | BPSS0264                                | 2 | 1973461 | 1973718 | 2009684 | 2009941 | 1981668 | 1981925 | 1965778 | 1966035 | 1935591 | 1935848 | 1144689 | 1144946 | 2002447 | 2002704 | 1868346 | 1868603 | 815383 | 815640 | 1811207 | 1811464 |
| 272 | Chr2_5a_ISBma2_A                        |   | 1971717 | 1973289 | 2007940 | 2009512 | 1979924 | 1981496 | 1964034 | 1965606 | 1933847 | 1935419 | 1142945 | 1144517 | 2000703 | 2002275 | 1866602 | 1868174 | 813639 | 815211 | 1809463 | 1811035 |
| 273 | Chr2_5b_ISBma2_A                        |   | 1638049 | 1639625 | 1668531 | 1670107 | 1632858 | 1634434 | 1631568 | 1633144 |         |         | 2146943 | 2148516 | 719172  | 720746  | 1189961 | 1191534 |        |        | 1506314 | 1507887 |
| 274 | BPSS0265_putative porin-related protein | 3 | 1637546 | 1637986 | 1668028 | 1668468 | 1632355 | 1632795 | 1631065 | 1631505 |         |         | 2149019 | 2148579 | 721249  | 720809  | 1189458 | 1189898 |        |        | 1505811 | 1506251 |
| 275 | Chr2_6_IS407A_A                         | 3 | 1636309 | 1637544 | 1666791 | 1668026 | 1631118 | 1632353 | 1629828 | 1631063 |         |         | 2149021 | 2150256 | 721251  | 722486  | 1188221 | 1189456 |        |        | 1504574 | 1505809 |
| 276 | BPSS0265_putative porin-related protein | 3 | 1635601 | 1636308 | 1666083 | 1666790 | 1630410 | 1631117 | 1629120 | 1629827 |         |         | 2150964 | 2150257 | 723194  | 722487  | 1187513 | 1188220 |        |        | 1503866 | 1504573 |
| 277 | BPSS0266                                | 3 | 1635288 | 1634491 | 1665770 | 1664973 | 1630097 | 1629300 | 1628807 | 1628010 |         |         | 2151277 | 2152074 | 723507  | 724304  | 1187200 | 1186403 |        |        | 1503553 | 1502756 |
| 278 | BPSS0267                                | 3 | 1632900 | 1634012 | 1663382 | 1664494 | 1627709 | 1628821 | 1626419 | 1627531 |         |         | 2153665 | 2152553 | 725895  | 724783  | 1184812 | 1185924 |        |        | 1501165 | 1502277 |
| 279 | BPSS0268                                | 3 | 1632628 | 1630517 | 1663110 | 1660999 | 1627437 | 1625326 | 1626147 | 1624036 |         |         | 2153937 | 2156048 | 726167  | 728278  | 1184540 | 1182429 |        |        | 1500893 | 1498782 |
| 280 | BPSS0269                                | 3 | 1629416 | 1630195 | 1659898 | 1660677 | 1624225 | 1625004 | 1622935 | 1623714 |         |         | 2157149 | 2156370 | 729379  | 728600  | 1181328 | 1182107 |        |        | 1497699 | 1498478 |
| 281 | BPSS0270                                | 3 | 1628283 | 1629179 | 1658765 | 1659661 | 1623092 | 1623988 | 1621802 | 1622698 |         |         | 2158282 | 2157386 | 730512  | 729616  | 1180195 | 1181091 |        |        | 1496566 | 1497462 |
| 282 | BPSS0271                                | 3 | 1628147 | 1626963 | 1658629 | 1657445 | 1622956 | 1621772 | 1621666 | 1620482 |         |         | 2158418 | 2159602 | 730648  | 731832  | 1180059 | 1178875 |        |        | 1496430 | 1495246 |
| 283 | Chr2_7_ISBma2_C                         | 3 |         |         |         |         |         |         |         |         | 1600353 | 1601926 |         |         |         |         |         |         |        |        |         |         |
| 284 | BPSS0272                                | 3 | 1626686 | 1625373 | 1657168 | 1655855 | 1621495 | 1620182 | 1620205 | 1618892 | 1600164 | 1598851 | 2159879 | 2161192 | 732109  | 733422  | 1178598 | 1177285 |        |        | 1494969 | 1493656 |
| 285 | BPSS0273                                | 3 | 1624102 | 1624818 | 1654584 | 1655300 | 1618911 | 1619627 | 1617621 | 1618337 | 1597580 | 1598296 | 2162463 | 2161747 | 734693  | 733977  | 1176014 | 1176730 |        |        | 1492385 | 1493101 |
| 286 | BPSS0274                                | 3 | 1622884 | 1623738 | 1653366 | 1654220 | 1617693 | 1618547 | 1616403 | 1617257 | 1596362 | 1597216 | 2163681 | 2162827 | 735911  | 735057  | 1174796 | 1175650 |        |        | 1491167 | 1492021 |
| 287 | BPSS0275                                | 3 | 1622719 | 1621520 | 1653201 | 1652002 | 1617528 | 1616329 | 1616238 | 1615039 | 1596197 | 1595004 | 2163846 | 2165045 | 736076  | 737275  | 1174631 | 1173432 |        |        | 1491002 | 1489803 |
| 288 | BPSS0276                                | 3 | 1620732 | 1619191 | 1651214 | 1649673 | 1615541 | 1614000 | 1614251 | 1612710 | 1594216 | 1592675 | 2165833 | 2167374 | 738063  | 739604  | 1172644 | 1171103 |        |        | 1489015 | 1487474 |
| 289 | BPSS0277                                | 3 | 1618084 | 1619097 | 1648566 | 1649579 | 1612893 | 1613906 | 1611603 | 1612616 | 1591568 | 1592581 | 2168481 | 2167468 | 740711  | 739698  | 1169996 | 1171009 |        |        | 1486367 | 1487380 |
| 290 | BPSS0278                                | 3 | 1616626 | 1617663 | 1647108 | 1648145 | 1611435 | 1612472 | 1610145 | 1611182 | 1590110 | 1591147 | 2169939 | 2168902 | 742169  | 741132  | 1168538 | 1169575 |        |        | 1484909 | 1485946 |
| 291 | BPSS0279                                | 3 | 1615682 | 1616626 | 1646164 | 1647108 | 1610491 | 1611435 | 1609201 | 1610145 | 1589166 | 1590110 | 2170883 | 2169939 | 743113  | 742169  | 1167594 | 1168538 |        |        | 1483965 | 1484909 |
| 292 | BPSS0280                                | 3 | 1612461 | 1613927 | 1642943 | 1644409 | 1607270 | 1608736 | 1605980 | 1607446 | 1585945 | 1587411 | 2174104 | 2172638 | 746334  | 744868  | 1164373 | 1165839 |        |        | 1480744 | 1482210 |
| 293 | BPSS0281                                | 3 | 1611120 | 1612400 | 1641602 | 1642882 | 1605929 | 1607209 | 1604639 | 1605919 | 1584604 | 1585884 | 2175445 | 2174165 | 747675  | 746395  | 1163032 | 1164312 |        |        | 1479403 | 1480683 |
| 294 | BPSS0282                                | 3 | 1610978 | 1609290 | 1641460 | 1639772 | 1605787 | 1604150 | 1604497 | 1604225 | 1584462 | 1582771 | 2175587 | 2177278 | 747817  | 749508  | 1162890 | 1161199 |        |        | 1479261 | 1477570 |
| 295 | BPSS0283                                | 3 | 1607876 | 1609318 | 1638358 | 1639800 | 1602685 | 1604127 | 1601460 | 1602902 | 1581306 | 1582748 | 2178743 | 2177301 | 750973  | 749531  | 1159734 | 1161176 |        |        | 1476105 | 1477547 |
| 296 | BPSS0284                                | 3 | 1607058 | 1607822 | 1637540 | 1638304 | 1601867 | 1602631 | 1600642 | 1601406 | 1580488 | 1581252 | 2179570 | 2178806 | 751791  | 751027  | 1158916 | 1159680 |        |        | 1475287 | 1476051 |
| 297 | BPSS0285                                | 3 | 1606153 | 1607058 | 1636635 | 1637540 | 1600962 | 1601867 | 1599737 | 1600642 | 1579583 | 1580488 | 2180475 | 2179570 | 752696  | 751791  | 1158011 | 1158916 |        |        | 1474382 | 1475287 |
| 298 | BPSS0285A_putative outer membrane pc    | 3 |         |         |         |         |         |         |         |         |         |         |         |         |         |         |         |         |        |        |         |         |
| 299 | BPSS0286                                | 3 | 1604404 | 1605234 | 1634886 | 1635716 | 1599213 | 1600043 | 1597988 | 1598818 | 1577834 | 1578664 | 2182224 | 2181394 | 754445  | 753615  | 1156262 | 1157092 |        |        | 1472633 | 1473463 |
| 300 | BPSS0287                                | 3 | 1604186 | 1603125 | 1634668 | 1633607 | 1598995 | 1597934 | 1597770 | 1596709 | 1577616 | 1576555 | 2182442 | 2183503 | 754663  | 755724  | 1156044 | 1154983 |        |        | 1472415 | 1471354 |
| 301 | BPSS0288                                | 3 | 1601763 | 1600705 | 1632245 | 1631187 | 1596572 | 1595514 | 1595347 | 1594289 | 1575193 | 1574135 | 2184865 | 2185923 | 757086  | 758144  | 1153621 | 1152563 |        |        | 1469992 | 1468934 |
| 302 | BPSS0289                                | 3 | 1600169 | 1600459 | 1630651 | 1630941 | 1594978 | 1595268 | 1593753 | 1594043 | 1573599 | 1573889 | 2186459 | 2186169 | 758680  | 758390  | 1152027 | 1152317 |        |        | 1468398 | 1468688 |
| 303 | BPSS0290                                | 3 | 1598240 | 1599241 | 1628722 | 1629723 | 1593049 | 1594050 | 1591824 | 1592825 | 1571678 | 1572679 | 2188436 | 2187435 | 760617  | 759616  | 1150090 | 1151091 |        |        | 1466461 | 1467462 |
| 304 | BPSS0291                                | 3 | 1598147 | 1597200 | 1628629 | 1627682 | 1592956 | 1592009 | 1591731 | 1590784 | 1571585 | 1570638 | 2188529 | 2189476 | 760710  | 761657  | 1149997 | 1149050 |        |        | 1466368 | 1465421 |
| 305 | BPSS0292                                | 3 | 1597147 | 1595921 | 1627629 | 1626403 | 1591956 | 1590730 | 1590731 | 1589505 | 1570585 | 1569359 | 2189529 | 2190755 | 761710  | 762936  | 1148997 | 1147771 |        |        | 1465368 | 1464142 |
| 306 | BPSS0293                                | 3 | 1595856 | 1592674 | 1626338 | 1623156 | 1590665 | 1587483 | 1589440 | 1586258 | 1569294 | 1566112 | 2190820 | 2194002 | 763001  | 766183  | 1147706 | 1144524 |        |        | 1464077 | 1460895 |
| 307 | BPSS0294                                | 3 | 1592660 | 1591131 | 1623142 | 1621613 | 1587469 | 1585940 | 1586244 | 1584715 | 1566098 | 1564569 | 2194016 | 2195545 | 766197  | 767726  | 1144510 | 1142981 |        |        | 1460881 | 1459352 |
| 308 | BPSS0295                                | 3 | 1589001 | 1590239 | 1619483 | 1620721 | 1583810 | 1585048 | 1582585 | 1583823 | 1562439 | 1563677 | 2197739 | 2196501 | 769920  | 768682  | 1140819 | 1142057 |        |        | 1457190 | 1458428 |
| 309 | BPSS0296                                | 3 | 1588358 | 1589014 | 1618840 | 1619496 | 1583167 | 1583823 | 1581942 | 1582598 | 1561796 | 1562452 | 2198382 | 2197726 | 770563  | 769907  | 1140176 | 1140832 |        |        | 1456547 | 1457203 |
| 310 | BPSS0297                                | 3 | 1588202 | 1587735 | 1618684 | 1618217 | 1583011 | 1582544 | 1581786 | 1581319 | 1561640 | 1561173 | 2198538 | 2199005 | 770719  | 771186  | 1140020 | 1139553 |        |        | 1456391 | 1455924 |
| 311 | BPSS0298                                | 3 | 1586645 | 1587541 | 1617127 | 1618023 | 1581454 | 1582350 | 1580229 | 1581125 | 1560083 | 1560979 | 2200095 | 2199199 | 772276  | 771380  | 1138463 | 1139359 |        |        | 1454834 | 1455730 |
| 312 | BPSS0299                                | 3 | 1584327 | 1586189 | 1614809 | 1616671 | 1579136 | 1580998 | 1577905 | 1579773 | 1557747 | 1559609 | 2202431 | 2200569 | 774612  | 772750  | 1136121 | 1137983 |        |        | 1452528 | 1454390 |
| 313 | BPSS0300                                | 3 | 1583411 | 1584307 | 1613893 | 1614789 | 1578220 | 1579116 | 1576989 | 1577885 | 1556831 | 1557727 | 2203347 | 2202451 | 775528  | 774632  | 1135205 | 1136101 |        |        | 1451612 | 1452508 |
| 314 | BPSS0301                                | 3 | 1582979 | 1583407 | 1613461 | 1613889 | 1577788 | 1578216 | 1576557 | 1576985 | 1556399 | 1556827 | 2203779 | 2203351 | 775960  | 775532  | 1134773 | 1135201 |        |        | 1451180 | 1451608 |
| 315 | BPSS0302                                | 3 | 1581052 | 1582908 | 1611534 | 1613390 | 1575861 | 1577717 | 1574630 | 1576486 | 1554472 | 1556328 | 2205706 | 2203850 | 777887  | 776031  | 1132846 | 1134702 |        |        | 1449253 | 1451109 |
| 316 | BPSS0303                                | 3 | 1579763 | 1581019 | 1610245 | 1611501 | 1574572 | 1575828 | 1573341 | 1574597 | 1553183 | 1554439 | 2206995 | 2205739 | 779176  | 777920  | 1131557 | 1132813 |        |        | 1447964 | 1449220 |
| 317 | BPSS0304                                | 3 | 1578285 | 1579763 | 1608767 | 1610245 | 1572309 | 1573010 | 1571863 | 1573341 | 1551705 | 1553183 | 2208473 | 2206995 | 780654  | 779176  | 1130346 | 1130882 |        |        | 1446521 | 1446796 |
| 318 | BPSS0305                                | 3 | 1577389 | 1577850 | 1607871 |         |         |         |         |         |         |         |         |         |         |         |         |         |        |        |         |         |

|     |                                       |   |         |         |         |         |         |         |         |         |         |         |         |         |        |        |         |         |         |         |
|-----|---------------------------------------|---|---------|---------|---------|---------|---------|---------|---------|---------|---------|---------|---------|---------|--------|--------|---------|---------|---------|---------|
| 319 | BPSS0306                              | 3 | 1565126 | 1570378 | 1595608 | 1600860 | 1557961 | 1558176 | 1558704 | 1563956 | 1538546 | 1543798 | 2221623 | 2216380 | 793804 | 788561 | 1117196 | 1122439 | 1434049 | 1435902 |
| 320 | BPSS0307                              | 3 | 1563669 | 1565078 | 1594151 | 1595560 | 1565604 | 1557913 | 1557237 | 1557509 | 1537089 | 1538498 | 2223080 | 2221671 | 795261 | 793852 | 1115739 | 1117148 | 1432592 | 1434001 |
| 321 | BPSS0308                              | 3 | 1562254 | 1563672 | 1592736 | 1594154 | 1554201 | 1554956 | 1555822 | 1557240 | 1535674 | 1537092 | 2224495 | 2223077 | 796676 | 795258 | 1114324 | 1115742 | 1431177 | 1432595 |
| 322 | BPSS0309                              | 3 | 1561166 | 1562242 | 1591648 | 1592724 | 1553113 | 1554189 | 1554734 | 1555810 | 1534586 | 1535662 | 2225583 | 2224507 | 797764 | 796688 | 1113236 | 1114312 | 1430089 | 1431165 |
| 323 | BPSS0310                              | 3 | 1559676 | 1560191 | 1590158 | 1590673 | 1551623 | 1552138 | 1553244 | 1553759 | 1533064 | 1533579 | 2227050 | 2226535 | 799244 | 798729 | 1111762 | 1112277 | 1428608 | 1429123 |
| 324 | BPSS0311                              | 3 | 1551048 | 1559573 | 1580630 | 1582630 | 1541942 | 1546162 | 1544752 | 1551855 | 1524436 | 1532961 | 2235678 | 2227153 | 807873 | 807355 | 1103320 | 1110051 | 1420193 | 1424377 |
| 325 | Chr2_8_IS407A_C                       | 3 |         |         |         |         |         |         |         |         | 1523165 | 1524400 |         |         |        |        |         |         |         |         |
| 326 | BPSS0312                              | 3 | 1549854 | 1549153 | 1579436 | 1578735 | 1540748 | 1540047 | 1543558 | 1542857 | 1522002 | 1521301 | 2236872 | 2237573 | 809067 | 809768 | 1102126 | 1101425 | 1418999 | 1418298 |
| 327 | BPSS0313                              | 3 | 1548820 | 1547984 | 1578402 | 1577566 | 1539714 | 1538878 | 1542524 | 1541688 | 1520968 | 1520132 | 2237906 | 2238742 | 810101 | 810937 | 1101092 | 1100256 | 1417964 | 1417128 |
| 328 | BPSS0314                              | 3 | 1547963 | 1546572 | 1577545 | 1576154 | 1538857 | 1537466 | 1541667 | 1540276 | 1520111 | 1518720 | 2238763 | 2240154 | 810958 | 812349 | 1100235 | 1098844 | 1417107 | 1415716 |
| 329 | BPSS0315                              | 3 | 1546500 | 1545361 | 1576082 | 1575351 | 1537394 | 1536255 | 1540204 | 1539065 | 1518648 | 1517509 | 2240226 | 2241365 | 812421 | 813560 | 1098772 | 1097633 | 1415644 | 1414505 |
| 330 | BPSS0316                              | 3 | 1545365 | 1544712 | 1574414 | 1573761 | 1536259 | 1535606 | 1539069 | 1538416 | 1517513 | 1516860 | 2241361 | 2242014 | 813556 | 814209 | 1097637 | 1096984 | 1414509 | 1413856 |
| 331 | BPSS0317                              | 3 | 1543953 | 1542775 | 1573002 | 1571824 | 1534847 | 1533669 | 1537657 | 1536479 | 1516101 | 1514923 | 2242785 | 2243963 | 814980 | 816158 | 1096195 | 1095017 | 1413097 | 1411919 |
| 332 | BPSS0318                              | 3 | 1541843 | 1542667 | 1570892 | 1571716 | 1532737 | 1533561 | 1535547 | 1536371 | 1513991 | 1514815 | 2244895 | 2244071 | 817090 | 816266 | 1094085 | 1094909 | 1410987 | 1411811 |
| 333 | BPSS0319                              | 3 | 1540948 | 1541544 | 1569997 | 1570593 | 1531842 | 1532438 | 1534652 | 1535248 | 1513096 | 1513692 | 2245790 | 2245194 | 817985 | 817389 | 1093190 | 1093786 | 1410092 | 1410688 |
| 334 | BPSS0320                              | 3 | 1540208 | 1540924 | 1569257 | 1569973 | 1531102 | 1531818 | 1533912 | 1534628 | 1512356 | 1513072 | 2246530 | 2245814 | 818725 | 818009 | 1092448 | 1093113 | 1409352 | 1410068 |
| 335 | BPSS0321                              | 3 | 1539806 | 1539003 | 1568855 | 1568052 | 1530700 | 1529897 | 1533510 | 1532707 | 1511954 | 1511151 | 2246922 | 2247725 | 819117 | 819920 | 1092056 | 1091253 | 1408940 | 1408137 |
| 336 | BPSS0322                              | 3 | 1539003 | 1537558 | 1568052 | 1566607 | 1529897 | 1528452 | 1532707 | 1531262 | 1511151 | 1509706 | 2247725 | 2249170 | 819920 | 821365 | 1091253 | 1089808 | 1408137 | 1406692 |
| 337 | BPSS0323                              | 3 | 1537558 | 1536836 | 1566607 | 1565885 | 1528452 | 1527730 | 1531262 | 1530540 | 1509706 | 1508984 | 2249170 | 2249892 | 821365 | 822087 | 1089808 | 1089086 | 1406692 | 1405970 |
| 338 | BPSS0324                              | 3 | 1536465 | 1534750 | 1565514 | 1564699 | 1527359 | 1526547 | 1530169 | 1528454 | 1508613 | 1506898 | 2250263 | 2251978 | 822458 | 824173 | 1088715 | 1087000 | 1405529 | 1404753 |
| 339 | BPSS0325                              | 3 | 1534418 | 1533984 | 1563018 | 1562584 | 1524778 | 1524344 | 1528122 | 1527688 | 1506566 | 1506132 | 2252310 | 2252744 | 824505 | 824939 | 1086668 | 1086234 | 1404421 | 1403987 |
| 340 | BPSS0326                              | 3 | 1532250 | 1533782 | 1560850 | 1562382 | 1522610 | 1524142 | 1525954 | 1527486 | 1504398 | 1505930 | 2254478 | 2252946 | 826673 | 825141 | 1084500 | 1086032 | 1402253 | 1403785 |
| 341 | BPSS0327                              | 3 | 1530690 | 1531979 | 1558865 | 1560154 | 1521050 | 1522339 | 1524394 | 1525683 | 1502838 | 1504127 | 2256038 | 2254749 | 828233 | 826944 | 1082940 | 1084229 | 1400767 | 1401762 |
| 342 | BPSS0328                              | 3 | 1529314 | 1530345 | 1557489 | 1558520 | 1519674 | 1520705 | 1523018 | 1524049 | 1501462 | 1502493 | 2257414 | 2256383 | 829609 | 828578 | 1081564 | 1082595 | 1399391 | 1400422 |
| 343 | BPSS0329                              | 3 | 1527729 | 1529318 | 1555904 | 1557493 | 1518089 | 1519678 | 1521433 | 1523022 | 1499877 | 1501466 | 2258999 | 2257410 | 831194 | 829605 | 1079979 | 1081568 | 1397806 | 1399395 |
| 344 | BPSS0330                              | 3 | 1526937 | 1527650 | 1554629 | 1555126 | 1516454 | 1517311 | 1519798 | 1520655 | 1498242 | 1499099 | 2260634 | 2259777 | 832829 | 831972 | 1078344 | 1079201 | 1396171 | 1397028 |
| 345 | BPSS0331                              | 3 | 1524713 | 1525630 | 1552503 | 1553420 | 1514817 | 1515734 | 1518416 | 1519333 | 1496861 | 1497778 | 2262015 | 2261098 | 834210 | 833293 | 1076963 | 1077880 | 1394790 | 1395707 |
| 346 | BPSS0332                              | 3 | 1524462 | 1523533 | 1552252 | 1551323 | 1514566 | 1513637 | 1518165 | 1517236 | 1496610 | 1495681 | 2262266 | 2263195 | 834461 | 835390 | 1076712 | 1075783 | 1394539 | 1393610 |
| 347 | BPSS0333                              | 3 | 1523533 | 1522394 | 1551323 | 1550709 | 1513637 | 1512498 | 1517236 | 1516097 | 1495681 | 1494542 | 2263195 | 2264334 | 835390 | 836538 | 1075783 | 1074644 | 1393610 | 1392471 |
| 348 | BPSS0334                              | 3 | 1522394 | 1522164 | 1550198 | 1549968 | 1512498 | 1512268 | 1516097 | 1515867 | 1494542 | 1494312 | 2264334 | 2264564 | 836538 | 836768 | 1074644 | 1074414 | 1392471 | 1392241 |
| 349 | BPSS0335                              | 3 | 1522164 | 1520875 | 1549968 | 1549291 | 1512268 | 1511996 | 1515867 | 1514578 | 1494312 | 1493023 | 2264564 | 2265853 | 836768 | 838057 | 1074414 | 1073125 | 1392241 | 1391330 |
| 350 | BPSS0336                              | 3 | 1520680 | 1519967 | 1547983 | 1547270 | 1509972 | 1509259 | 1514383 | 1513670 | 1492828 | 1492115 | 2266048 | 2266761 | 838252 | 838965 | 1072930 | 1072217 | 1390901 | 1390344 |
| 351 | BPSS0337                              | 3 | 1519497 | 1519763 | 1546800 | 1547066 | 1508789 | 1509055 | 1513200 | 1513466 | 1491645 | 1491911 | 2267231 | 2266965 | 839435 | 839169 | 1071747 | 1072013 | 748509  | 748243  |
| 352 | Chr2_9a_IS407A_A                      |   | 1517607 | 1518842 | 1544910 | 1546145 | 1506899 | 1508134 | 1511310 | 1512545 | 1489755 | 1490990 | 2267886 | 2269121 | 840090 | 841325 | 1069857 | 1071092 | 749164  | 750399  |
| 353 | Chr2_9b_IS407A_A                      |   | 869730  | 870965  | 883719  | 884954  | 944285  | 945520  | 865037  | 866272  | 1236549 | 1237784 |         |         |        |        | 1718700 | 1719935 | 845139  | 846374  |
| 354 | BPSS0338                              | 4 | 871763  | 870966  | 885752  | 884955  | 946318  | 945521  | 867070  | 866273  | 1235751 | 1236548 | 2269919 | 2269122 | 842123 | 841326 | 1069059 | 1069856 | 1720733 | 1719936 |
| 355 | BPSS0339                              | 4 | 873973  | 871922  | 887962  | 885911  | 948528  | 946477  | 869280  | 867229  | 1233541 | 1235592 | 2272129 | 2270078 | 844333 | 842282 | 1066849 | 1068900 | 1722943 | 1720892 |
| 356 | BPSS0340                              | 4 | 874233  | 874685  | 888222  | 888674  | 948788  | 949240  | 869540  | 869992  | 1233281 | 1232829 | 2272389 | 2272841 | 844593 | 845045 | 1066589 | 1066137 | 1723203 | 1723655 |
| 357 | BPSS0341                              | 4 | 874685  | 875536  | 888674  | 889525  | 949240  | 950091  | 869992  | 870843  | 1232829 | 1231978 | 2272841 | 2273692 | 845045 | 845896 | 1066137 | 1065286 | 1723655 | 1724506 |
| 358 | BPSS0342                              | 4 | 875587  | 876930  | 889576  | 890919  | 950142  | 951485  | 870894  | 872237  | 1231927 | 1230584 | 2273743 | 2275086 | 845947 | 847290 | 1065235 | 1064114 | 1724557 | 1725900 |
| 359 | BPSS0343                              | 4 | 878296  | 877190  | 892285  | 891179  | 952851  | 951745  | 873603  | 872497  | 1229218 | 1230324 | 2276600 | 2275494 | 848804 | 847698 | 1062683 | 1063789 | 1727266 | 1726160 |
| 360 | BPSS0344                              | 4 | 878534  | 879613  | 893223  | 893602  | 953089  | 954168  | 873878  | 874957  | 1228980 | 1227901 | 2276838 | 2277917 | 849042 | 850121 | 1062445 | 1061366 | 1727504 | 1728583 |
| 361 | BPSS0345                              | 4 | 879673  | 880767  | 893662  | 894756  | 954228  | 955322  | 875017  | 876111  | 1227841 | 1226747 | 2277977 | 2279071 | 850181 | 851275 | 1061306 | 1060212 | 1728643 | 1729737 |
| 362 | BPSS0346                              | 4 | 880748  | 881692  | 894737  | 895681  | 955303  | 956079  | 876092  | 877036  | 1226766 | 1225822 | 2279052 | 2279996 | 851256 | 852200 | 1060231 | 1059287 | 1729718 | 1730662 |
| 363 | BPSS0347                              | 4 | 881685  | 882542  | 895674  | 896531  | 956835  | 957692  | 877029  | 877886  | 1225829 | 1224972 | 2279989 | 2280846 | 852193 | 853050 | 1059294 | 1058437 | 1730655 | 1731512 |
| 364 | BPSS0348                              | 4 | 882589  | 883857  | 896578  | 897846  | 957739  | 959007  | 877933  | 879201  | 1224925 | 1223657 | 2280893 | 2282161 | 853097 | 854365 | 1058390 | 1057122 | 1731559 | 1732827 |
| 365 | BPSS0349                              | 4 | 883866  | 885308  | 897855  | 899297  | 959016  | 960458  | 879210  | 880652  | 1223648 | 1222206 | 2282170 | 2283612 | 854374 | 855816 | 1057113 | 1055671 | 1732836 | 1734278 |
| 366 | BPSS0350                              | 4 | 885316  | 885864  | 899305  | 899853  | 960466  | 961014  | 880660  | 881208  | 1222198 | 1221650 | 2283620 | 2284093 | 855824 | 856372 | 1055663 | 1055115 | 1734286 | 1734834 |
| 367 | BPSS0351_putative copper-related MerR | 4 |         |         |         |         |         |         |         |         |         |         |         |         |        |        |         |         |         |         |
| 368 | Chr2_10a_IS407A_A                     |   | 891974  | 893209  | 905698  | 906933  | 967328  | 968563  | 887110  | 888345  | 1214324 | 1215557 | 6183    | 7418    | 862482 | 863717 | 1052451 | 1053615 | 6022    | 7257    |
| 369 | Chr2_10b_IS407A_A                     |   |         |         |         |         |         |         |         |         |         |         | 20142   | 21377   | 876441 | 877676 | 106411  | 107646  |         |         |













|     |                  |    |        |        |        |        |        |        |        |        |         |         |       |       |         |         |        |        |  |        |        |
|-----|------------------|----|--------|--------|--------|--------|--------|--------|--------|--------|---------|---------|-------|-------|---------|---------|--------|--------|--|--------|--------|
| 625 | BPSS0582         |    |        |        |        |        |        |        |        |        |         |         |       |       |         |         |        |        |  |        |        |
| 626 | BPSS0583         |    |        |        |        |        |        |        |        |        |         |         |       |       |         |         |        |        |  |        |        |
| 627 | BPSS0584         |    |        |        |        |        |        |        |        |        |         |         |       |       |         |         |        |        |  |        |        |
| 628 | BPSS0585         |    |        |        |        |        |        |        |        |        |         |         |       |       |         |         |        |        |  |        |        |
| 629 | BPSS0586         |    |        |        |        |        |        |        |        |        |         |         |       |       |         |         |        |        |  |        |        |
| 630 | BPSS0587         |    |        |        |        |        |        |        |        |        |         |         |       |       |         |         |        |        |  |        |        |
| 631 | BPSS0588         |    |        |        |        |        |        |        |        |        |         |         |       |       |         |         |        |        |  |        |        |
| 632 | BPSS0589         |    |        |        |        |        |        |        |        |        |         |         |       |       |         |         |        |        |  |        |        |
| 633 | BPSS0590         |    |        |        |        |        |        |        |        |        |         |         |       |       |         |         |        |        |  |        |        |
| 634 | BPSS0591         |    |        |        |        |        |        |        |        |        |         |         |       |       |         |         |        |        |  |        |        |
| 635 | BPSS0592         |    |        |        |        |        |        |        |        |        |         |         |       |       |         |         |        |        |  |        |        |
| 636 | BPSS0593         |    |        |        |        |        |        |        |        |        |         |         |       |       |         |         |        |        |  |        |        |
| 637 | BPSS0594         |    |        |        |        |        |        |        |        |        |         |         |       |       |         |         |        |        |  |        |        |
| 638 | BPSS0595         |    |        |        |        |        |        |        |        |        |         |         |       |       |         |         |        |        |  |        |        |
| 639 | BPSS0596         |    |        |        |        |        |        |        |        |        |         |         |       |       |         |         |        |        |  |        |        |
| 640 | BPSS0597         |    |        |        |        |        |        |        |        |        |         |         |       |       |         |         |        |        |  |        |        |
| 641 | BPSS0598         |    |        |        |        |        |        |        |        |        |         |         |       |       |         |         |        |        |  |        |        |
| 642 | BPSS0599         |    |        |        |        |        |        |        |        |        |         |         |       |       |         |         |        |        |  |        |        |
| 643 | BPSS0600         |    |        |        |        |        |        |        |        |        |         |         |       |       |         |         |        |        |  |        |        |
| 644 | BPSS0601         |    |        |        |        |        |        |        |        |        |         |         |       |       |         |         |        |        |  |        |        |
| 645 | BPSS0602         |    |        |        |        |        |        |        |        |        |         |         |       |       |         |         |        |        |  |        |        |
| 646 | BPSS0603         |    |        |        |        |        |        |        |        |        |         |         |       |       |         |         |        |        |  |        |        |
| 647 | BPSS0604         |    |        |        |        |        |        |        |        |        |         |         |       |       |         |         |        |        |  |        |        |
| 648 | BPSS0605         |    |        |        |        |        |        |        |        |        |         |         |       |       |         |         |        |        |  |        |        |
| 649 | BPSS0606         |    |        |        |        |        |        |        |        |        |         |         |       |       |         |         |        |        |  |        |        |
| 650 | BPSS0607         |    |        |        |        |        |        |        |        |        |         |         |       |       |         |         |        |        |  |        |        |
| 651 | BPSS0608         |    |        |        |        |        |        |        |        |        |         |         |       |       |         |         |        |        |  |        |        |
| 652 | BPSS0609         |    |        |        |        |        |        |        |        |        |         |         |       |       |         |         |        |        |  |        |        |
| 653 | BPSS0610         |    |        |        |        |        |        |        |        |        |         |         |       |       |         |         |        |        |  |        |        |
| 654 | BPSS0611         |    |        |        |        |        |        |        |        |        |         |         |       |       |         |         |        |        |  |        |        |
| 655 | BPSS0612         |    |        |        |        |        |        |        |        |        |         |         |       |       |         |         |        |        |  |        |        |
| 656 | BPSS0613         |    |        |        |        |        |        |        |        |        |         |         |       |       |         |         |        |        |  |        |        |
| 657 | BPSS0614         |    |        |        |        |        |        |        |        |        |         |         |       |       |         |         |        |        |  |        |        |
| 658 | BPSS0615         |    |        |        |        |        |        |        |        |        |         |         |       |       |         |         |        |        |  |        |        |
| 659 | BPSS0616         |    |        |        |        |        |        |        |        |        |         |         |       |       |         |         |        |        |  |        |        |
| 660 | BPSS0617         |    |        |        |        |        |        |        |        |        |         |         |       |       |         |         |        |        |  |        |        |
| 661 | BPSS0618         |    |        |        |        |        |        |        |        |        |         |         |       |       |         |         |        |        |  |        |        |
| 662 | BPSS0619         |    |        |        |        |        |        |        |        |        |         |         |       |       |         |         |        |        |  |        |        |
| 663 | BPSS0620         |    |        |        |        |        |        |        |        |        |         |         |       |       |         |         |        |        |  |        |        |
| 664 | BPSS0621         |    |        |        |        |        |        |        |        |        |         |         |       |       |         |         |        |        |  |        |        |
| 665 | BPSS0622         |    |        |        |        |        |        |        |        |        |         |         |       |       |         |         |        |        |  |        |        |
| 666 | BPSS0623         |    |        |        |        |        |        |        |        |        |         |         |       |       |         |         |        |        |  |        |        |
| 667 | BPSS0624         |    |        |        |        |        |        |        |        |        |         |         |       |       |         |         |        |        |  |        |        |
| 668 | BPSS0625         |    |        |        |        |        |        |        |        |        |         |         |       |       |         |         |        |        |  |        |        |
| 669 | BPSS0626         |    |        |        |        |        |        |        |        |        |         |         |       |       |         |         |        |        |  |        |        |
| 670 | Chr2_24_IS407A_A |    | 838658 | 839893 | 852556 | 853791 | 881257 | 882492 | 836729 | 837964 | 1438414 | 1439649 | 22152 | 23387 | 1533196 | 1534431 | 382829 | 384064 |  | 749164 | 750399 |
| 671 | BPSS0627         | 11 | 839895 | 840005 | 853793 | 853903 | 882494 | 882604 | 837966 | 838076 | 1439651 | 1439761 | 23389 | 23499 | 1533194 | 1533084 | 384066 | 384176 |  | 750401 | 750511 |
| 672 | BPSS0628         | 11 | 841443 | 840532 | 855341 | 854430 | 884042 | 883131 | 839514 | 838603 | 1441181 | 1440270 | 24910 | 23999 | 1531673 | 1532584 | 385587 | 384676 |  | 751922 | 751011 |
| 673 | BPSS0629         | 11 |        |        |        |        |        |        |        |        | 1441226 | 1441333 |       |       | 1531628 | 1531521 | 385632 | 385964 |  |        |        |
| 674 | BPSS0630         | 11 | 841982 | 842689 | 855880 | 856587 | 884581 | 885288 | 840053 | 840760 | 1441765 | 1442472 | 25431 | 26138 | 1531116 | 1530409 | 386090 | 386797 |  | 752434 | 753141 |
| 675 | BPSS0631         | 11 | 843080 | 844192 | 856978 | 858090 | 885679 | 886791 | 841151 | 842263 | 1442864 | 1443976 | 26529 | 27641 | 1530018 | 1528906 | 387188 | 388300 |  | 753532 | 754644 |

|               |                                |    |         |         |         |         |         |         |         |         |         |         |       |       |         |         |        |        |  |  |        |        |
|---------------|--------------------------------|----|---------|---------|---------|---------|---------|---------|---------|---------|---------|---------|-------|-------|---------|---------|--------|--------|--|--|--------|--------|
| 676 BPSS0632  |                                | 11 | 846844  | 844535  | 860742  | 858433  | 889443  | 887134  | 844915  | 842606  | 1446628 | 1444319 | 30293 | 27984 | 1526254 | 1528563 | 390952 | 388643 |  |  | 757149 | 754987 |
| 677 BPSS0633  |                                | 11 | 847630  | 848691  | 861528  | 862589  | 890229  | 891290  | 845701  | 846762  | 1447486 | 1448547 | 31115 | 32176 | 1525444 | 1524383 | 391750 | 392811 |  |  | 758090 | 759151 |
| 678 BPSS0634  |                                | 11 | 849191  | 849778  | 863089  | 863676  | 891790  | 892377  | 847262  | 847849  | 1449047 | 1449634 | 32676 | 33263 | 1523883 | 1523296 | 393311 | 393898 |  |  | 759651 | 760238 |
| 679 BPSS0635  |                                | 11 | 850074  | 852200  | 863972  | 866098  | 892673  | 894019  | 848145  | 848621  | 1449930 | 1451363 | 33568 | 35694 | 1522991 | 1520865 | 394203 | 395543 |  |  | 760534 | 760887 |
| 680 BPSS0636  |                                | 11 | 852299  | 852559  | 866197  | 866457  | 926854  | 927114  | 850259  | 850519  | 1452356 | 1452589 | 35793 | 36053 | 1520766 | 1520506 | 396302 | 396562 |  |  | 761724 | 761984 |
| 681 BPSS0637  |                                | 11 | 853785  | 852799  | 867683  | 866697  | 928340  | 927354  |         |         | 1453588 | 1452692 | 37279 | 36293 | 1519280 | 1520266 | 397788 | 396802 |  |  | 763210 | 762224 |
| 682 BPSS0639  |                                | 11 | 854150  | 854623  | 868048  | 868521  | 928705  | 929178  | 851160  | 851321  | 1453953 | 1454426 | 37644 | 38117 | 1518915 | 1518442 |        |        |  |  | 763575 | 764048 |
| 683 BPSS0640  |                                | 11 | 854925  | 855581  | 869559  | 870215  | 929480  | 930136  | 851623  | 852279  |         |         | 38419 | 39075 | 1518140 | 1517484 | 398271 | 398774 |  |  | 764350 | 765006 |
| 684 BPSS0641  |                                | 11 | 855625  | 856332  | 870259  | 870696  | 930180  | 930887  | 852323  | 852940  | 1454565 | 1455272 | 39119 | 39826 | 1517440 | 1516733 | 398818 | 399525 |  |  | 765050 | 765757 |
| 685 BPSS0642  |                                | 11 | 859594  | 858218  | 873583  | 872207  | 934149  | 932773  | 854901  | 853525  | 1310016 | 1311392 | 43116 | 41740 | 1513457 | 1514833 | 402613 | 401237 |  |  | 769012 | 767636 |
| 686 BPSS0643  |                                | 11 | 860253  | 859594  | 874242  | 873583  | 934808  | 934149  | 855560  | 854901  | 1309357 | 1310016 | 43775 | 43116 | 1512798 | 1513457 | 403272 | 402613 |  |  | 769671 | 769012 |
| 687 BPSS0644  |                                | 11 | 860414  | 861271  | 874403  | 875260  | 934969  | 935826  | 855721  | 856578  | 1309196 | 1308339 | 43936 | 44793 | 1512637 | 1511780 | 403433 | 404290 |  |  | 769832 | 770689 |
| 688 BPSS0645  |                                | 11 | 861660  | 861926  | 875649  | 875915  | 936215  | 936481  | 856967  | 857233  | 1307950 | 1307684 | 45182 | 45448 | 1511391 | 1511125 | 404679 | 404945 |  |  | 771078 | 771344 |
| 689 BPSS0646  |                                | 11 | 862484  | 862149  | 876473  | 876138  | 937039  | 936704  | 857791  | 857456  | 1307126 | 1307461 | 46006 | 45671 | 1510567 | 1510902 | 405503 | 405168 |  |  | 771902 | 771567 |
| 690 BPSS0647  |                                | 11 | 863041  | 862577  | 877030  | 876566  | 937596  | 937132  | 858348  | 857884  | 1306569 | 1307033 | 46563 | 46099 | 1510010 | 1510474 | 406060 | 405596 |  |  | 772459 | 771995 |
| 691 BPSS0648  |                                | 11 | 863148  | 864101  | 877137  | 878090  | 937703  | 938656  | 858455  | 859408  | 1306462 | 1305509 | 46670 | 47623 | 1509903 | 1508950 | 406167 | 407120 |  |  | 772566 | 773519 |
| 692 BPSS0649  |                                | 11 | 864692  | 865153  | 878681  | 879142  | 939247  | 939708  | 859999  | 860460  | 1304928 | 1304467 | 48194 | 48655 | 1508379 | 1507918 | 407691 | 408152 |  |  | 774090 | 774551 |
| 693 BPSS0650  |                                | 11 | 865220  | 866668  | 879209  | 880657  | 939775  | 941223  | 860527  | 861975  | 1304400 | 1302952 | 48722 | 50170 | 1507851 | 1506403 | 408219 | 409667 |  |  | 774618 | 776066 |
| 694 BPSS0651  |                                | 11 | 866781  | 867146  | 880770  | 881135  | 941336  | 941701  | 862088  | 862453  | 1302839 | 1302474 | 50283 | 50648 | 1506290 | 1505925 | 409780 | 410145 |  |  | 776179 | 776544 |
| 695 BPSS0652  |                                | 11 | 867676  | 868251  | 881665  | 882240  | 942231  | 942806  | 862983  | 863558  | 1301944 | 1301369 | 51178 | 51753 | 1505395 | 1504820 | 410675 | 411250 |  |  | 777074 | 777649 |
| 696           | Chr2_25_IS407A_C               | 11 |         |         |         |         |         |         |         |         |         |         |       |       |         |         |        |        |  |  | 778318 | 779533 |
| 697 BPSS0652a |                                | 11 | 869058  | 869363  |         |         |         |         |         |         |         |         | 52611 | 52850 | 1503962 | 1503723 | 412108 | 412347 |  |  |        |        |
| 698 BPSS0653  | transposase (partial_IS407A or | 11 | 869345  | 869563  | 883334  | 883552  | 943900  | 944118  | 864652  | 864870  | 1300275 | 1300057 | 52835 | 53053 | 1503738 | 1503520 | 412332 | 412550 |  |  | 779983 | 780201 |
| 699 BPSS0654  |                                | 11 |         |         |         |         |         |         |         |         |         |         | 53470 | 55203 | 1503103 | 1501370 | 412967 | 414700 |  |  | 780618 | 782351 |
| 700 BPSS0655  |                                | 11 |         |         |         |         |         |         |         |         |         |         | 55460 | 56518 | 1501113 | 1499452 | 414957 | 416618 |  |  | 782608 | 783042 |
| 701 BPSS0656  |                                | 11 |         |         |         |         |         |         |         |         |         |         |       |       | 1499417 | 1499043 | 416653 | 417027 |  |  |        |        |
| 702 BPSS0657  | transposase (partial_IS407A or | 11 | 869345  | 869563  | 883334  | 883552  | 943900  | 944118  | 864652  | 864870  | 1300275 | 1300057 | 52835 | 53053 | 1503738 | 1503520 | 412332 | 412550 |  |  | 779983 | 780201 |
| 703           | Chr2_26_IS407A_A               |    | 869730  | 870965  | 883719  | 884954  | 944285  | 945520  | 865037  | 866272  | 1298656 | 1299890 | 56520 | 57755 | 1497556 | 1498791 | 418100 | 419335 |  |  | 783043 | 784278 |
| 704 BPSS0658  | GI14                           |    |         |         |         |         |         |         |         |         |         |         |       |       |         |         |        |        |  |  |        |        |
| 705 BPSS0659  | GI14                           |    |         |         |         |         |         |         |         |         |         |         |       |       |         |         |        |        |  |  |        |        |
| 706 BPSS0660  | GI14                           |    |         |         |         |         |         |         |         |         |         |         |       |       |         |         |        |        |  |  |        |        |
| 707 BPSS0661  | GI14                           |    |         |         |         |         |         |         |         |         |         |         |       |       |         |         |        |        |  |  |        |        |
| 708 BPSS0663  | GI14                           |    |         |         |         |         |         |         |         |         |         |         |       |       |         |         |        |        |  |  |        |        |
| 709 BPSS0664  | GI14                           |    |         |         |         |         |         |         |         |         |         |         |       |       |         |         |        |        |  |  |        |        |
| 710 BPSS0664a | GI14                           |    |         |         |         |         |         |         |         |         |         |         |       |       |         |         |        |        |  |  |        |        |
| 711 BPSS0665  | GI14                           |    |         |         |         |         |         |         |         |         |         |         |       |       |         |         |        |        |  |  |        |        |
| 712           | Chr2_27_IS407A_A               |    | 1225576 | 1226811 | 1246300 | 1247535 | 1310457 | 1311650 | 1219713 | 1220948 | 1298656 | 1299890 | 56520 | 57755 | 1497556 | 1498791 | 418100 | 419335 |  |  | 783043 | 784278 |
| 713 BPSS0666  |                                | 12 | 1224944 | 1225576 | 1245668 | 1246300 | 1309825 | 1310457 | 1219081 | 1219713 | 1298024 | 1298656 | 58387 | 57755 | 1496924 | 1497556 | 419967 | 419335 |  |  | 784910 | 784278 |
| 714 BPSS0667  | acetyltransferase (GNAT) famil | 12 |         |         |         |         |         |         |         |         |         |         |       |       |         |         |        |        |  |  |        |        |
| 715 BPSS0668  |                                | 12 | 1224200 | 1223985 | 1244924 | 1244709 | 1309081 | 1308866 | 1218337 | 1218122 | 1297280 | 1297065 | 59131 | 59346 | 1496180 | 1495965 | 420711 | 420926 |  |  | 785654 | 785869 |
| 716 BPSS0669  |                                | 12 | 1222561 | 1223787 | 1243285 | 1244511 | 1307442 | 1308668 | 1216698 | 1217924 | 1295641 | 1296867 | 60770 | 59544 | 1494541 | 1495767 | 422350 | 421124 |  |  | 787293 | 786067 |
| 717 BPSS0670  |                                | 12 | 1220747 | 1222141 | 1241471 | 1242865 | 1305628 | 1307022 | 1214884 | 1216278 | 1293827 | 1295221 | 62584 | 61190 | 1492727 | 1494121 | 424164 | 422770 |  |  | 789107 | 787713 |
| 718 BPSS0671  |                                | 12 | 1220069 | 1218378 | 1240050 | 1238575 | 1304634 | 1302943 | 1214206 | 1212515 | 1293149 | 1291458 | 63262 | 64953 | 1492049 | 1490358 | 424842 | 426533 |  |  | 789785 | 791476 |
| 719 BPSS0672  |                                | 12 | 1217974 | 1217165 | 1238171 | 1237362 | 1302539 | 1301730 | 1212111 | 1211302 | 1291054 | 1290245 | 65357 | 66166 | 1489954 | 1489145 | 426937 | 427746 |  |  | 791880 | 792689 |
| 720 BPSS0673  |                                | 12 | 1217097 | 1216507 | 1237294 | 1236704 | 1301662 | 1301072 | 1211234 | 1210644 | 1290177 | 1289587 | 66234 | 66824 | 1489077 | 1488487 | 427814 | 428404 |  |  | 792757 | 793347 |
| 721 BPSS0674  |                                | 12 | 1216482 | 1216183 | 1236679 | 1236380 | 1301047 | 1300748 | 1210619 | 1210320 | 1289562 | 1289263 | 66849 | 67148 | 1488462 | 1488163 | 428429 | 428728 |  |  | 793372 | 793671 |
| 722 BPSS0675  |                                | 12 | 1215198 | 1216085 | 1235395 | 1236282 | 1299763 | 1300650 | 1209335 | 1210222 | 1288278 | 1289165 | 68133 | 67246 | 1487178 | 1488065 | 429713 | 428826 |  |  | 794656 | 793769 |
| 723 BPSS0676  |                                | 12 | 1214674 | 1213853 | 1234871 | 1234050 | 1299239 | 1298418 | 1208811 | 1207990 | 1287754 | 1286933 | 68657 | 69478 | 1486654 | 1485833 | 430237 | 431058 |  |  | 795180 | 796001 |
| 724 BPSS0677  |                                | 12 | 1213632 | 1211665 | 1233829 | 1231862 | 1298197 | 1296230 | 1207769 | 1205802 | 1286712 | 1284745 | 69699 | 71666 | 1485612 | 1483645 | 431279 | 433246 |  |  | 796222 | 798189 |
| 725 BPSS0678  |                                | 12 | 1211356 | 1211607 | 1231553 | 1231804 | 1295921 | 1296172 | 1205493 | 1205744 | 1284436 | 1284687 | 71975 | 71724 | 1483336 | 1483587 | 433555 | 433304 |  |  | 798498 | 798247 |
| 726 BPSS0679  |                                | 12 | 1208290 | 1210518 | 1228155 | 1230383 | 1292170 | 1292589 | 1202680 | 1204458 | 1281370 | 1283598 | 75041 | 72813 | 1480270 | 1482498 | 436621 | 434393 |  |  | 801564 | 799336 |

|                                   |                   |     |         |         |         |         |         |         |         |         |         |         |        |        |         |         |        |        |        |        |
|-----------------------------------|-------------------|-----|---------|---------|---------|---------|---------|---------|---------|---------|---------|---------|--------|--------|---------|---------|--------|--------|--------|--------|
| 727 BPSS0680                      |                   | 12  | 1207826 | 1208284 | 1227691 | 1228149 | 1291706 | 1292164 | 1202216 | 1202674 | 1280906 | 1281364 | 75505  | 75047  | 1479806 | 1480264 | 437085 | 436627 | 802028 | 801570 |
| 728 BPSS0681                      |                   | 12  | 1207625 | 1206645 | 1227490 | 1226597 | 1291505 | 1290525 | 1202015 | 1201035 | 1280705 | 1279725 | 75706  | 76686  | 1479605 | 1478625 | 437286 | 438266 | 802229 | 803209 |
| 729 BPSS0682                      |                   | 12  | 1206421 | 1206026 | 1226318 | 1225923 | 1290301 | 1289906 | 1200811 | 1200416 | 1279501 | 1279106 | 76910  | 77305  | 1478401 | 1478006 | 438490 | 438885 | 803433 | 803828 |
| 730 BPSS0683                      |                   | 12  | 1205235 | 1205588 | 1225132 | 1225485 | 1289115 | 1289468 | 1199625 | 1199978 | 1278315 | 1278668 | 78096  | 77743  | 1477215 | 1477568 | 439676 | 439323 | 804619 | 804266 |
| 731 BPSS0684                      |                   | 12  | 1204830 | 1203595 | 1224727 | 1223492 | 1288710 | 1287475 | 1199220 | 1197985 | 1277910 | 1276675 | 78501  | 79736  | 1476810 | 1475575 | 440081 | 441316 | 805024 | 806259 |
| 732 BPSS0685                      |                   | 12  | 1203587 | 1202376 | 1223484 | 1222273 | 1287467 | 1286256 | 1197977 | 1196766 | 1276667 | 1275456 | 79744  | 80955  | 1475567 | 1474356 | 441324 | 442535 | 806267 | 807478 |
| 733 BPSS0686                      |                   | 12  | 1202285 | 1200885 | 1222182 | 1220782 | 1286165 | 1284765 | 1196675 | 1195275 | 1275365 | 1273965 | 81046  | 82446  | 1474265 | 1472865 | 442626 | 444026 | 807569 | 808969 |
| 734 BPSS0686a                     |                   | 12  | 1200885 | 1200799 | 1220767 | 1220696 | 1284765 | 1284679 | 1195275 | 1195189 | 1273965 | 1273879 | 82446  | 82532  | 1472865 | 1472779 | 444026 | 444112 | 808969 | 809055 |
| 735 BPSS0687                      |                   | 12  | 1199278 | 1200603 | 1218706 | 1219728 | 1283158 | 1284483 | 1193668 | 1194993 | 1272358 | 1273683 | 84053  | 82728  | 1471258 | 1472583 | 445633 | 444308 | 810576 | 809251 |
| 736 BPSS0688                      |                   | 12  | 1198555 | 1199274 | 1217983 | 1218702 | 1282435 | 1283154 | 1192945 | 1193664 | 1271635 | 1272354 | 84776  | 84057  | 1470535 | 1471254 | 446356 | 445637 | 811299 | 810580 |
| 737 BPSS0689                      |                   | 12  | 1198347 | 1197571 | 1217775 | 1216999 | 1282227 | 1281451 | 1192737 | 1191961 | 1271427 | 1270651 | 84984  | 85760  | 1470327 | 1469551 | 446564 | 447340 | 811507 | 812283 |
| 738 BPSS0690                      |                   | 12  | 1197544 | 1196360 | 1216972 | 1215788 | 1281424 | 1280240 | 1191934 | 1190750 | 1270624 | 1269440 | 85787  | 86971  | 1469524 | 1468340 | 447367 | 448551 | 812310 | 813494 |
| 739 BPSS0691                      |                   | 12  | 1195876 | 1196310 | 1215304 | 1215738 | 1279756 | 1280190 | 1190266 | 1190700 | 1268956 | 1269390 | 87455  | 87021  | 1467856 | 1468290 | 449035 | 448601 | 813978 | 813544 |
| 740 BPSS0692                      |                   | 12  | 1195710 | 1195024 | 1215138 | 1214452 | 1279590 | 1278904 | 1190100 | 1189414 | 1268790 | 1268104 | 87621  | 88307  | 1467690 | 1467004 | 449201 | 449887 | 814144 | 814830 |
| 741 BPSS0693                      |                   | 12  | 1195024 | 1194263 | 1214452 | 1213691 | 1278904 | 1278143 | 1189414 | 1188653 | 1268104 | 1267343 | 88307  | 89068  | 1467004 | 1466243 | 449887 | 450648 | 814830 | 815591 |
| 742 BPSS0694                      |                   | 12  | 1194236 | 1192776 | 1213664 | 1212204 | 1278116 | 1276656 | 1188626 | 1187166 | 1267316 | 1265856 | 89095  | 90555  | 1466216 | 1464756 | 450675 | 452135 | 815618 | 817078 |
| 743 BPSS0695                      |                   | 12  | 1192703 | 1191858 | 1212131 | 1211286 | 1276583 | 1275738 | 1187093 | 1186248 | 1265783 | 1264938 | 90628  | 91473  | 1464683 | 1463838 | 452208 | 453053 | 817151 | 817996 |
| 744 BPSS0696                      |                   | 12  | 1191797 | 1191408 | 1211225 | 1210836 | 1275677 | 1275288 | 1186187 | 1185798 | 1264877 | 1264488 | 91534  | 91923  | 1463777 | 1463388 | 453114 | 453503 | 818057 | 818446 |
| 745 BPSS0697                      |                   | 12  | 1191382 | 1190582 | 1210810 | 1210010 | 1275262 | 1274462 | 1185744 | 1185061 | 1264462 | 1263662 | 91949  | 92749  | 1463362 | 1462562 | 453529 | 454329 | 818472 | 819272 |
| 746 BPSS0698                      |                   | 12  | 1190205 | 1189825 | 1209997 | 1209611 | 1274449 | 1274063 | 1185048 | 1184662 | 1263649 | 1263263 | 92762  | 93148  | 1462549 | 1462163 | 454342 | 454728 | 819285 | 819671 |
| 747 BPSS0699                      |                   | 12  | 1188985 | 1189824 | 1208413 | 1209252 | 1272865 | 1273704 | 1183464 | 1184303 | 1262065 | 1262904 | 94346  | 93507  | 1460965 | 1461804 | 455926 | 455087 | 820869 | 820030 |
| 748 BPSS0700                      |                   | 12  | 1188708 | 1187746 | 1208136 | 1207174 | 1272588 | 1271626 | 1183187 | 1182225 | 1261788 | 1260826 | 94623  | 95585  | 1460688 | 1459726 | 456203 | 457165 | 821146 | 822108 |
| 749 BPSS0701                      |                   | 12  | 1186559 | 1187647 | 1205987 | 1207075 | 1270439 | 1271527 | 1181038 | 1182126 | 1259639 | 1260727 | 96772  | 95684  | 1458539 | 1459627 | 458352 | 457264 | 823295 | 822207 |
| 750 BPSS0702                      |                   | 12  | 1185014 | 1186078 | 1204442 | 1205506 | 1268894 | 1269958 | 1179493 | 1180557 | 1258094 | 1259158 | 98324  | 97260  | 1456980 | 1458044 | 459918 | 458854 | 824833 | 823769 |
| 751 BPSS0703                      |                   | 12  | 1184737 | 1185018 | 1202682 | 1204196 | 1267134 | 1268648 | 1177733 | 1179247 | 1256334 | 1257848 | 100084 | 98570  | 1455220 | 1456734 | 461678 | 460164 | 826593 | 825079 |
| 752 BPSS0704                      |                   | 12  | 1182065 | 1183150 | 1201494 | 1202579 | 1265946 | 1267031 | 1176545 | 1177630 | 1255146 | 1256231 | 101272 | 100187 | 1454032 | 1455117 | 462866 | 461781 | 827781 | 826696 |
| 753 BPSS0705                      |                   | 12  | 1181936 | 1181268 | 1201365 | 1200697 | 1265817 | 1265149 | 1176416 | 1175748 | 1255017 | 1254349 | 101401 | 102069 | 1453903 | 1453235 | 462995 | 463663 | 827910 | 828578 |
| 754 BPSS0706                      |                   | 12  | 1181268 | 1179766 | 1200697 | 1199195 | 1265149 | 1263647 | 1175748 | 1174246 | 1254349 | 1252847 | 102069 | 103571 | 1453235 | 1451733 | 463663 | 465165 | 828578 | 830080 |
| 755 BPSS0707                      |                   | 12  | 1178265 | 1179131 | 1197694 | 1198560 | 1262146 | 1263012 | 1172745 | 1173611 | 1251346 | 1252212 | 104988 | 104206 | 1450316 | 1451098 | 466582 | 465800 | 831581 | 830715 |
| 756                               | Chr2_28_IS407A_B  | 12  |         |         |         |         |         |         |         |         |         |         | 104943 | 106178 | 1449126 | 1450361 | 466537 | 467772 |        |        |
| 757                               | Chr2_29_ISBma1_B  | 12  | 1175066 | 1176372 | 1194495 | 1195801 | 1258947 | 1260253 | 1169546 | 1170852 |         |         |        |        |         |         |        |        |        |        |
| 758 BPSS0708                      |                   | 12  | 1175037 | 1173838 | 1194466 | 1193267 | 1258918 | 1257719 | 1169517 | 1168318 | 1249424 | 1248225 |        |        |         |         |        |        | 833503 | 834702 |
| 759 BPSS0709                      | Chr2_30_ISBma2_A  | 12  | 1172245 | 1173705 | 1191674 | 1193134 | 1256126 | 1257586 | 1166725 | 1168185 | 1246632 | 1248092 |        |        |         |         |        |        | 836295 | 834835 |
| 760 BPSS0710                      |                   | 13  |         |         |         |         |         |         |         |         | 1245161 | 1244379 |        |        |         |         |        |        | 837778 | 838560 |
| 761 BPSS0711                      |                   | 13  |         |         |         |         |         |         |         |         | 1242929 | 1244050 |        |        |         |         |        |        | 839985 | 838864 |
| 762 BPSS0712                      |                   | 13  |         |         |         |         |         |         |         |         | 1242400 | 1242023 |        |        |         |         |        |        | 840514 | 840891 |
| 763 BPSS0713                      |                   | 13  |         |         |         |         |         |         |         |         | 1241855 | 1240623 |        |        |         |         |        |        | 841059 | 842291 |
| 764 BPSS0714                      |                   | 13  |         |         |         |         |         |         |         |         | 1240615 | 1239644 |        |        |         |         |        |        | 842299 | 843270 |
| 765 BPSS0715                      |                   | 13  |         |         |         |         |         |         |         |         | 1238889 | 1239419 |        |        |         |         |        |        | 844025 | 843495 |
| 766 BPSS0716_hypothetical protein |                   | 13  |         |         |         |         |         |         |         |         | 1237808 | 1238641 |        |        |         |         |        |        | 845115 | 844282 |
| 767                               | Chr2_31a_IS407A_A |     |         |         |         |         |         |         |         |         | 1236549 | 1237784 |        |        |         |         |        |        | 845139 | 846374 |
| 768                               | Chr2_31b_IS407A_A |     | 1517607 | 1518842 | 1544910 | 1546145 | 1506899 | 1508134 | 1511310 | 1512545 | 1198234 | 1199469 | 104943 | 106178 | 1449126 | 1450361 | 466537 | 467772 | 535045 | 536280 |
| 769 BPSS0717                      |                   | 14a | 1516341 | 1517606 | 1543644 | 1544909 | 1505633 | 1506898 | 1510044 | 1511309 | 1196968 | 1198233 | 107444 | 106179 | 1447860 | 1449125 | 469038 | 467773 | 533779 | 535044 |
| 770 BPSS0718                      |                   | 14a | 1515355 | 1514714 | 1542658 | 1542458 | 1504647 | 1504006 | 1509058 | 1508417 | 1195954 | 1195313 | 108421 | 109062 | 1446874 | 1446233 | 470068 | 470709 | 532766 | 532125 |
| 771 BPSS0719                      |                   | 14a | 1514166 | 1513489 | 1540945 | 1540268 | 1503458 | 1502781 | 1507869 | 1507192 | 1194765 | 1194088 | 109610 | 110287 | 1445685 | 1445008 | 471257 | 471934 | 531577 | 530900 |
| 772 BPSS0720                      |                   | 14a | 1513197 | 1512103 | 1539976 | 1538882 | 1502489 | 1501395 | 1506900 | 1505806 | 1193796 | 1192702 | 110579 | 111673 | 1444716 | 1443622 | 472226 | 473320 | 530608 | 529514 |
| 773 BPSS0721                      |                   | 14a | 1511128 | 1510370 | 1537907 | 1537149 | 1500420 | 1499662 | 1504831 | 1504073 | 1191727 | 1190969 | 112648 | 113406 | 1442647 | 1441889 | 474295 | 475053 | 528539 | 527781 |
| 774 BPSS0721a                     |                   | 14a | 1510124 | 1509636 | 1536903 | 1536415 | 1499416 | 1498928 | 1503827 | 1503339 | 1190743 | 1190255 | 113643 | 114131 | 1441652 | 1441164 | 475290 | 475778 | 527511 | 527023 |
| 775 BPSS0723                      |                   | 14a | 1509486 | 1508419 | 1536265 | 1535198 | 1498778 | 1497711 | 1503189 | 1502122 | 1190105 | 1189038 | 114281 | 115348 | 1441014 | 1439947 | 475928 | 476995 | 526873 | 525806 |
| 776 BPSS0724                      |                   | 14a | 1508290 | 1507898 | 1535066 | 1534677 | 1497582 | 1497190 | 1501993 | 1501601 | 1188909 | 1188517 | 115477 | 115869 | 1439818 | 1439426 | 477124 | 477516 | 525677 | 525285 |
| 777 BPSS0725                      |                   | 14a | 1506823 | 1507614 | 1533602 | 1534393 | 1496115 | 1496906 | 1500526 | 1501317 | 1187424 | 1188215 | 116953 | 116162 | 1438342 | 1439133 | 478600 | 477809 | 524201 | 524992 |
|                                   |                   |     |         |         |         |         |         |         |         |         |         |         |        |        |         |         |        |        | 738965 | 738174 |



|     |                               |     |         |         |         |         |         |         |         |         |         |         |        |        |         |         |        |        |        |        |        |        |
|-----|-------------------------------|-----|---------|---------|---------|---------|---------|---------|---------|---------|---------|---------|--------|--------|---------|---------|--------|--------|--------|--------|--------|--------|
| 778 | BPSS0726                      | 14a | 1504972 | 1506477 | 1531751 | 1533256 | 1494264 | 1495769 | 1498675 | 1500180 | 1185573 | 1187078 | 118804 | 117299 | 1436491 | 1437996 | 480451 | 478946 | 522359 | 523864 | 740807 | 739302 |
| 779 | BPSS0727                      | 14a | 1504868 | 1504152 | 1531647 | 1530931 | 1494160 | 1493444 | 1498571 | 1497855 | 1185469 | 1184753 | 118908 | 119624 | 1436387 | 1435671 | 480555 | 481271 | 522255 | 521539 | 740911 | 741627 |
| 780 | BPSS0728                      | 14a | 1502975 | 1503664 | 1529754 | 1530443 | 1492267 | 1492956 | 1496678 | 1497367 | 1183576 | 1184265 | 120793 | 120104 | 1434494 | 1435183 | 482448 | 481759 | 520362 | 521051 | 742812 | 742123 |
| 781 | BPSS0730                      | 14a | 1502156 | 1502857 | 1528935 | 1529636 | 1491448 | 1492149 | 1495859 | 1496560 | 1182757 | 1183458 | 121612 | 120911 | 1433675 | 1434376 | 483267 | 482566 | 519543 | 520244 | 743631 | 742930 |
| 782 | BPSS0731                      | 14a | 1501854 | 1500196 | 1528633 | 1526975 | 1491146 | 1489488 | 1495557 | 1493899 | 1182455 | 1180797 | 121914 | 123572 | 1433373 | 1431715 | 483569 | 485227 | 519241 | 517583 | 743942 | 745600 |
| 783 | BPSS0732_hypothetical protein | 14a |         |         |         |         |         |         |         |         |         |         |        |        |         |         |        |        |        |        |        |        |
| 784 | BPSS0733                      | 14a | 1499450 | 1499872 | 1524547 | 1526301 | 1487060 | 1488814 | 1491471 | 1493225 | 1178369 | 1180123 | 125998 | 123896 | 1429287 | 1431041 | 487655 | 485901 | 515155 | 516909 | 747962 | 746274 |
| 785 | Chr2_32a_IS407A_C             |     |         |         |         |         |         |         |         |         |         |         |        |        |         |         |        |        |        |        | 749164 | 750399 |
| 786 | Chr2_32b_IS407A_C             |     |         |         |         |         |         |         |         |         |         |         |        |        |         |         |        |        |        |        | 878187 | 878956 |
| 787 | BPSS0734                      | 14b | 1495567 | 1497423 | 1522346 | 1524202 | 1484859 | 1486715 | 1489270 | 1491126 | 1176168 | 1178024 | 128199 | 126343 | 1427086 | 1428942 | 489856 | 488000 | 512954 | 514810 | 880932 | 879076 |
| 788 | BPSS0735                      | 14b | 1493542 | 1495506 | 1520321 | 1522285 | 1482834 | 1484798 | 1487245 | 1489209 | 1174142 | 1176007 | 130224 | 128260 | 1425061 | 1427025 | 491881 | 489917 | 510929 | 512893 | 882957 | 880993 |
| 789 | BPSS0736                      | 14b | 1492214 | 1493536 | 1518993 | 1520315 | 1481506 | 1482828 | 1485917 | 1487239 | 1172814 | 1174136 | 131552 | 130230 | 1423733 | 1425055 | 493209 | 491887 | 509601 | 510923 | 884285 | 882963 |
| 790 | BPSS0737                      | 14b | 1490660 | 1490752 | 1517439 | 1517531 | 1479952 | 1480044 | 1484363 | 1484455 | 1171260 | 1171352 | 133106 | 133014 | 1422179 | 1422271 | 494763 | 494671 | 508047 | 508139 | 885839 | 885747 |
| 791 | BPSS0738                      | 14b | 1489622 | 1489296 | 1516401 | 1516075 | 1478914 | 1478588 | 1483325 | 1482999 | 1170222 | 1169896 | 134144 | 134470 | 1421141 | 1420815 | 495801 | 496127 | 507009 | 506683 | 886877 | 887203 |
| 792 | BPSS0739                      | 14b | 1487914 | 1488405 | 1514693 | 1515184 | 1476329 | 1476820 | 1481617 | 1482108 | 1168505 | 1168996 | 135870 | 135379 | 1419415 | 1419906 | 497554 | 497063 | 505283 | 505774 | 888603 | 888112 |
| 793 | BPSS0740                      | 14b | 1486978 | 1487760 | 1513757 | 1514539 | 1475393 | 1476175 | 1480681 | 1481463 | 1167569 | 1168351 | 136806 | 136024 | 1418479 | 1419261 | 498490 | 497708 | 504347 | 505129 | 889539 | 888757 |
| 794 | BPSS0741                      | 14b | 1485074 | 1486021 | 1511853 | 1512800 | 1473489 | 1474436 | 1478777 | 1479724 | 1165686 | 1166633 | 138703 | 137756 | 1416589 | 1417536 | 500394 | 499447 | 502457 | 503404 | 891428 | 890481 |
| 795 | BPSS0742                      | 14b | 1484970 | 1483618 | 1511749 | 1510397 | 1473385 | 1472033 | 1478673 | 1477321 | 1165582 | 1164230 | 138807 | 140159 | 1416485 | 1415133 | 500498 | 501850 | 502353 | 501001 | 891532 | 892884 |
| 796 | BPSS0743                      | 14b | 1483404 | 1481890 | 1510183 | 1508669 | 1471819 | 1470305 | 1477107 | 1475593 | 1164016 | 1162502 | 140373 | 141887 | 1414919 | 1413405 | 502064 | 503578 | 500787 | 499273 | 893098 | 894612 |
| 797 | Chr2_33_IS407A_A              |     | 1480359 | 1481594 | 1507138 | 1508373 | 1468774 | 1470009 | 1474062 | 1475297 | 1160971 | 1162206 | 142183 | 143418 | 1411874 | 1413109 | 503874 | 505109 | 497742 | 498977 | 894908 | 896143 |
| 798 | BPSS0744                      |     |         |         |         |         |         |         |         |         |         |         |        |        |         |         |        |        |        |        |        |        |
| 799 | BPSS0745                      |     |         |         |         |         |         |         |         |         |         |         |        |        |         |         |        |        |        |        |        |        |
| 800 | Chr2_34_IS407A_A              |     | 592085  | 593320  | 603189  | 604424  | 631977  | 633212  | 590631  | 591866  | 547403  | 548638  | 924390 | 925625 | 1782102 | 1783337 | 134525 | 135760 |        |        |        |        |
| 801 | BPSS0746                      | 15  | 594435  | 593305  | 605539  | 604409  | 634327  | 633197  | 592981  | 591851  | 549753  | 548623  | 923275 | 924405 | 1780987 | 1782117 | 136875 | 135745 |        |        |        |        |
| 802 | BPSS0747                      | 15  | 594954  | 596048  | 606058  | 607152  | 634846  | 635940  | 593500  | 594594  | 550272  | 551366  | 922756 | 921662 | 1780468 | 1779374 | 137394 | 138488 |        |        |        |        |
| 803 | BPSS0748                      | 15  | 597041  | 596673  | 608145  | 607777  | 636933  | 636565  | 595587  | 595219  | 552359  | 551991  | 920669 | 921037 | 1778381 | 1778749 | 139481 | 139113 |        |        |        |        |
| 804 | BPSS0749                      | 15  | 598008  | 597211  | 609112  | 608315  | 637900  | 637103  | 596554  | 595757  | 553326  | 552529  | 919702 | 920499 | 1777414 | 1778211 | 140448 | 139651 |        |        |        |        |
| 805 | BPSS0750                      | 15  | 598130  | 599536  | 609234  | 610640  | 638022  | 639428  | 596676  | 598082  | 553448  | 554854  | 919580 | 918174 | 1777292 | 1775886 | 140570 | 141976 |        |        |        |        |
| 806 | BPSS0751                      | 15  | 599581  | 600708  | 610685  | 611812  | 639473  | 640600  | 598127  | 599254  | 554899  | 556026  | 918129 | 917002 | 1775841 | 1774714 | 142021 | 143148 |        |        |        |        |
| 807 | BPSS0752                      | 15  | 602348  | 600705  | 613452  | 611809  | 642240  | 640597  | 600894  | 599251  | 557666  | 556023  | 915362 | 917005 | 1773074 | 1774717 | 144788 | 143145 |        |        |        |        |
| 808 | BPSS0753                      | 15  | 602843  | 602526  | 613947  | 613630  | 642735  | 642418  | 601389  | 601072  | 558161  | 557844  | 914867 | 915184 | 1772579 | 1772896 | 145283 | 144966 |        |        |        |        |
| 809 | BPSS0754                      | 15  | 605105  | 602871  | 616209  | 613975  | 644997  | 642763  | 603651  | 601417  | 560423  | 558189  | 912605 | 914839 | 1770317 | 1772551 | 147545 | 145311 |        |        |        |        |
| 810 | BPSS0755                      | 15  | 605316  | 606323  | 616420  | 617427  | 645208  | 646215  | 603862  | 604869  | 560634  | 561641  | 912394 | 911387 | 1770106 | 1769099 | 147756 | 148763 |        |        |        |        |
| 811 | BPSS0756                      | 15  | 607131  | 606832  | 618235  | 617936  | 647023  | 646724  | 605677  | 605378  | 562449  | 562150  | 910579 | 910878 | 1768291 | 1768590 | 149571 | 149272 |        |        |        |        |
| 812 | BPSS0757                      | 15  | 607450  | 608601  | 618554  | 619705  | 647342  | 648493  | 605996  | 607147  | 562768  | 563919  | 910260 | 909109 | 1767972 | 1766821 | 149890 | 151041 |        |        |        |        |
| 813 | BPSS0758                      | 15  | 608718  | 609179  | 619822  | 620283  | 648610  | 649071  | 607264  | 607725  | 564036  | 564497  | 908992 | 908531 | 1766704 | 1766243 | 151158 | 151619 |        |        |        |        |
| 814 | BPSS0759                      | 15  | 609732  | 610991  | 620836  | 622095  | 649624  | 650883  | 608278  | 609537  | 565050  | 566309  | 907978 | 906719 | 1765690 | 1764431 | 152172 | 153431 |        |        |        |        |
| 815 | BPSS0760                      | 15  | 610999  | 612228  | 622103  | 623332  | 650891  | 652120  | 609545  | 610774  | 566317  | 567546  | 906711 | 905482 | 1764423 | 1763194 | 153439 | 154668 |        |        |        |        |
| 816 | BPSS0761                      | 15  | 612231  | 613484  | 623335  | 624588  | 652123  | 653376  | 610777  | 612030  | 567549  | 568802  | 905479 | 904226 | 1763191 | 1761938 | 154671 | 155924 |        |        |        |        |
| 817 | BPSS0762                      | 15  | 614891  | 613557  | 625995  | 624661  | 654783  | 653449  | 613437  | 612103  | 570209  | 568875  | 902805 | 904139 | 1760524 | 1761858 | 157338 | 156004 |        |        |        |        |
| 818 | BPSS0763                      | 15  | 616019  | 615090  | 627123  | 626194  | 655911  | 654982  | 614565  | 613636  | 571337  | 570408  | 901677 | 902606 | 1759396 | 1760325 | 158466 | 157537 |        |        |        |        |
| 819 | BPSS0764                      | 15  | 616858  | 616064  | 627962  | 627168  | 656750  | 655956  | 615404  | 614610  | 572176  | 571382  | 900838 | 901632 | 1758557 | 1759351 | 159305 | 158511 |        |        |        |        |
| 820 | BPSS0765                      | 15  | 617689  | 616976  | 628793  | 628080  | 657581  | 656868  | 616235  | 615522  | 573007  | 572294  | 900007 | 900720 | 1757726 | 1758439 | 160136 | 159423 |        |        |        |        |
| 821 | BPSS0766                      | 15  | 618036  | 619379  | 629140  | 630483  | 657928  | 659271  | 616582  | 617925  | 573354  | 574697  | 899660 | 898317 | 1757379 | 1756036 | 160483 | 161826 |        |        |        |        |
| 822 | BPSS0767                      | 15  | 620029  | 619709  | 631133  | 630813  | 659921  | 659601  | 618575  | 618255  | 575347  | 575027  | 897667 | 897987 | 1755386 | 1755706 | 162476 | 162156 |        |        |        |        |
| 823 | BPSS0768                      | 15  | 624166  | 624128  | 635270  | 635232  | 664058  | 664020  | 620698  | 620501  | 577470  | 577273  | 893488 | 893526 | 1751228 | 1751266 | 164599 | 164402 |        |        |        |        |
| 824 | BPSS0769                      | 15  | 625168  | 624191  | 636272  | 635295  | 665060  | 664083  | 623721  | 622744  | 580493  | 579516  | 892486 | 893463 | 1750226 | 1751203 | 167601 | 166624 |        |        |        |        |
| 825 | BPSS0770                      | 15  | 626342  | 625707  | 637446  | 636811  | 666234  | 665599  | 624895  | 624260  | 581667  | 581032  | 891312 | 891947 | 1749052 | 1749687 | 168775 | 168140 |        |        |        |        |
| 826 | BPSS0771                      | 15  | 627517  | 627735  | 638621  | 638839  | 667409  | 667627  | 626070  | 626288  | 582842  | 583060  | 890137 | 889919 | 1747877 | 1747659 | 169950 | 170168 |        |        |        |        |
| 827 | BPSS0772                      | 15  | 628340  | 628819  | 639444  | 639923  | 668232  | 668711  | 626893  | 627372  | 583665  | 584144  | 889314 | 888835 | 1747054 | 1746575 | 170773 | 171252 |        |        |        |        |
| 828 | BPSS0773                      | 15  | 629647  | 629123  | 640751  | 640227  | 669539  | 669015  | 628200  | 627676  | 584972  | 584448  | 888007 | 888531 | 1745747 | 1746271 | 172080 | 171556 |        |        |        |        |

|              |    |        |        |        |        |        |        |        |        |        |        |        |        |         |         |        |        |        |        |
|--------------|----|--------|--------|--------|--------|--------|--------|--------|--------|--------|--------|--------|--------|---------|---------|--------|--------|--------|--------|
| 829 BPSS0774 | 15 | 629655 | 630395 | 640759 | 641499 | 669547 | 670287 | 628208 | 628948 | 584980 | 585720 | 887999 | 887259 | 1745739 | 1744999 | 172088 | 172828 |        |        |
| 830 BPSS0776 | 15 | 630663 | 631595 | 641767 | 642699 | 670555 | 671487 | 629216 | 630148 | 585988 | 586920 | 886991 | 886059 | 1744731 | 1743799 | 173096 | 174028 |        |        |
| 831 BPSS0777 | 15 | 632286 | 632699 | 643390 | 643803 | 672178 | 672591 | 630845 | 631258 | 587584 | 587997 | 885356 | 884943 | 1743131 | 1742718 | 174678 | 175091 |        |        |
| 832 BPSS0778 | 15 | 633228 | 632791 | 644332 | 643895 | 673120 | 672683 | 631787 | 631350 | 588526 | 588089 | 884414 | 884851 | 1742189 | 1742626 | 175620 | 175183 |        |        |
| 833 BPSS0779 | 15 | 635023 | 635847 | 646127 | 646951 | 674915 | 675739 | 633582 | 634406 | 590321 | 591145 | 882619 | 881795 | 1740394 | 1739570 | 177415 | 178239 |        |        |
| 834 BPSS0780 | 15 | 636017 | 637462 | 647121 | 647528 | 675909 | 677354 | 634576 | 636021 | 591315 | 592760 | 881625 | 880180 | 1739400 | 1737955 | 178409 | 179854 |        |        |
| 835 BPSS0781 | 15 | 638073 | 638459 | 648787 | 649392 | 677375 | 677980 | 636042 | 636647 | 592781 | 593386 | 880159 | 879554 | 1737934 | 1737329 | 179875 | 180480 |        |        |
| 836 BPSS0782 | 15 | 639559 | 640761 | 650863 | 652065 | 679451 | 680653 | 638118 | 639320 | 594857 | 596059 | 878083 | 876881 | 1735858 | 1734656 | 181951 | 183153 |        |        |
| 837 BPSS0783 | 15 | 641298 | 642434 | 652602 | 653738 | 681190 | 682326 | 639857 | 640993 | 596684 | 597820 | 876176 | 875040 | 1733839 | 1732703 | 183674 | 184810 |        |        |
| 838 BPSS0784 | 15 | 642510 | 644231 | 653814 | 655535 | 682402 | 684123 | 641069 | 642790 | 597896 | 599617 | 874964 | 873243 | 1732627 | 1730906 | 184886 | 186607 |        |        |
| 839 BPSS0785 | 15 | 645323 | 644502 | 656627 | 655806 | 685215 | 684394 | 643882 | 643061 | 600709 | 599888 | 872151 | 872972 | 1729814 | 1730635 | 187699 | 186878 |        |        |
| 840 BPSS0786 | 15 | 645512 | 646522 | 656816 | 657826 | 685404 | 686414 | 644071 | 645081 | 600898 | 601908 | 871962 | 870952 | 1729625 | 1728615 | 187888 | 188898 |        |        |
| 841 BPSS0787 | 15 | 646522 | 648075 | 657826 | 659379 | 686414 | 687967 | 645081 | 646634 | 601908 | 603461 | 870952 | 869399 | 1728615 | 1727062 | 188898 | 190451 |        |        |
| 842 BPSS0788 | 15 | 648068 | 649090 | 659372 | 660394 | 687960 | 688982 | 646627 | 647649 | 603454 | 604476 | 869406 | 868384 | 1727069 | 1726047 | 190444 | 191268 |        |        |
| 843 BPSS0789 | 15 | 649090 | 649407 | 660394 | 660711 | 688982 | 689299 | 647649 | 647966 | 604476 | 604793 | 868384 | 868067 | 1726047 | 1725730 | 191468 | 191785 |        |        |
| 844 BPSS0790 | 15 | 649445 | 650764 | 660749 | 662068 | 689337 | 690656 | 648004 | 649323 | 604831 | 606150 | 868029 | 866710 | 1725692 | 1724373 | 191823 | 193142 |        |        |
| 845 BPSS0791 | 15 | 651039 | 651875 | 662591 | 663388 | 690931 | 691767 | 649598 | 650434 | 606425 | 607261 | 866435 | 865599 | 1724098 | 1723262 | 193417 | 194253 |        |        |
| 846 BPSS0792 | 15 | 652018 | 652758 | 663531 | 664271 | 691910 | 692650 | 650577 | 651317 | 607404 | 608144 | 865456 | 864716 | 1723119 | 1722379 | 194396 | 195136 |        |        |
| 847 BPSS0793 | 15 | 652837 | 653676 | 665189 | 665189 | 692729 | 693568 | 651396 | 652235 | 608223 | 609062 | 864637 | 863798 | 1722300 | 1721461 | 195215 | 196054 |        |        |
| 848 BPSS0794 | 15 | 653831 | 654604 | 665344 | 666117 | 693723 | 694496 | 652390 | 653163 | 609217 | 609990 | 863643 | 862870 | 1721306 | 1720533 | 196209 | 196982 |        |        |
| 849 BPSS0795 | 15 | 654643 | 654978 | 666156 | 666491 | 694535 | 694870 | 653202 | 653537 | 610029 | 610364 | 862831 | 862496 | 1720494 | 1720159 | 197021 | 197356 |        |        |
| 850          |    | 656707 | 657942 | 668220 | 669455 | 696599 | 697834 | 655266 | 656501 | 612093 | 613328 | 859532 | 860767 | 1717195 | 1718430 | 199085 | 200320 | 545708 | 546943 |
| 851 BPSS0796 | 16 | 665118 | 664381 | 676631 | 675894 | 705010 | 704273 | 663677 | 662940 | 620504 | 619767 | 851840 | 852577 | 1709503 | 1710240 | 208012 | 207275 | 554119 | 553382 |
| 852 BPSS0797 | 16 | 665697 | 665236 | 677210 | 676749 | 705589 | 705128 | 664256 | 663795 | 621083 | 620622 | 851261 | 851722 | 1708924 | 1709385 | 208591 | 208130 | 554698 | 554237 |
| 853 BPSS0798 | 16 | 666933 | 665716 | 678446 | 677229 | 706825 | 705608 | 665492 | 664275 | 622319 | 621102 | 850025 | 851242 | 1707688 | 1708905 | 209827 | 208610 | 555934 | 554717 |
| 854 BPSS0799 | 16 | 668424 | 667813 | 679937 | 679326 | 708316 | 707705 | 666983 | 666372 | 623810 | 623199 | 848534 | 849145 | 1706197 | 1706808 | 211318 | 210707 | 557425 | 556814 |
| 855 BPSS0800 | 16 | 668539 | 668973 | 680052 | 680486 | 708431 | 708865 | 667098 | 667532 | 623925 | 624359 | 848419 | 847985 | 1706082 | 1705648 | 211433 | 211867 | 557540 | 557974 |
| 856 BPSS0801 | 16 | 669125 | 670264 | 680638 | 681777 | 709017 | 710156 | 667684 | 668823 | 624511 | 625650 | 847833 | 846694 | 1705496 | 1704357 | 212019 | 213158 | 558126 | 559265 |
| 857 BPSS0802 | 16 | 670729 | 671361 | 682242 | 682874 | 710621 | 711253 | 669288 | 669920 | 626115 | 626747 | 846229 | 845597 | 1703892 | 1703260 | 213623 | 214255 | 559734 | 560366 |
| 858 BPSS0803 | 16 | 671799 | 671425 | 683312 | 682938 | 711691 | 711317 | 670358 | 669984 | 627185 | 626811 | 845159 | 845533 | 1702822 | 1703196 | 214693 | 214319 | 560804 | 560430 |
| 859 BPSS0804 | 16 | 674501 | 672438 | 686014 | 683951 | 714393 | 712330 | 673060 | 670997 | 629887 | 627824 | 842457 | 844520 | 1700120 | 1702183 | 217395 | 215332 | 563506 | 561443 |
| 860 BPSS0805 | 16 | 675295 | 674831 | 686808 | 686344 | 715187 | 714723 | 673854 | 673390 | 630681 | 630217 | 841663 | 842127 | 1699326 | 1699790 | 218189 | 217725 | 564300 | 563836 |
| 861 BPSS0806 | 16 | 675628 | 677010 | 687141 | 688523 | 715520 | 716902 | 674187 | 675569 | 631014 | 632396 | 841330 | 839948 | 1698993 | 1697611 | 218522 | 219904 | 564633 | 566015 |
| 862 BPSS0807 | 16 | 677045 | 678244 | 688558 | 689757 | 716937 | 718136 | 675604 | 676803 | 632431 | 633630 | 839913 | 838714 | 1697576 | 1696377 | 219939 | 221138 | 566050 | 567249 |
| 863 BPSS0808 | 16 | 678579 | 678965 | 690092 | 690478 | 718471 | 718857 | 677138 | 677524 | 633965 | 634351 | 838379 | 837993 | 1696042 | 1695656 | 221473 | 221859 | 567601 | 567987 |
| 864 BPSS0809 | 16 | 680112 | 680723 | 691625 | 692236 | 720004 | 720615 | 678671 | 679282 | 635498 | 636109 | 836846 | 836235 | 1694509 | 1693898 | 223006 | 223617 | 569134 | 569745 |
| 865 BPSS0810 | 16 | 681625 | 680894 | 693138 | 692407 | 721517 | 720786 | 680184 | 679453 | 637011 | 636280 | 835333 | 836064 | 1692996 | 1693727 | 224519 | 223788 | 570647 | 569916 |
| 866 BPSS0811 | 16 | 683085 | 682966 | 694598 | 694479 | 722977 | 722858 | 681644 | 681525 | 638471 | 638352 | 833873 | 833992 | 1691536 | 1691655 | 225979 | 225860 | 572107 | 571988 |
| 867 BPSS0812 | 16 | 684661 | 686073 | 696174 | 697586 | 724553 | 725965 | 683220 | 684632 | 640047 | 641459 | 832273 | 830861 | 1689941 | 1688529 | 227573 | 228985 | 573695 | 575107 |
| 868 BPSS0813 | 16 | 686087 | 686452 | 697600 | 697965 | 725979 | 726344 | 684646 | 685011 | 641473 | 641838 | 830847 | 830482 | 1688515 | 1688150 | 228999 | 229364 | 575121 | 575486 |
| 869 BPSS0814 | 16 | 686439 | 687056 | 697952 | 698569 | 726331 | 726948 | 684998 | 685615 | 641825 | 642442 | 830495 | 829878 | 1688163 | 1687546 | 229351 | 229968 | 575473 | 576090 |
| 870 BPSS0815 | 16 | 689640 | 687097 | 701714 | 701652 | 729532 | 726989 | 688199 | 685656 | 645026 | 642483 | 827296 | 829449 | 1684964 | 1687117 | 232547 | 230397 | 578656 | 576131 |
| 871 BPSS0816 | 16 | 696097 | 689933 | 708171 | 702007 | 735989 | 729825 | 694656 | 688492 | 651525 | 645367 | 820827 | 826991 | 1678489 | 1684659 | 239031 | 232867 | 585113 | 578949 |
| 872 BPSS0817 | 16 | 696650 | 697108 | 708724 | 709182 | 736542 | 737000 | 695209 | 695667 | 652094 | 652552 | 820282 | 819824 | 1677944 | 1677486 | 239576 | 240034 | 585862 | 586140 |
| 873 BPSS0818 | 16 | 698271 | 698738 | 710345 | 710812 | 738163 | 738630 | 696830 | 697297 | 653724 | 654191 | 818661 | 818194 | 1676323 | 1675856 | 241197 | 241664 | 587312 | 587779 |
| 874 BPSS0819 | 16 | 700242 | 700937 | 710812 | 711879 | 738630 | 739787 | 697297 | 698817 | 654191 | 655711 | 818194 | 816674 | 1675856 | 1674336 | 241664 | 243184 | 587779 | 589170 |
| 875 BPSS0820 | 16 | 700937 | 701854 | 713540 | 714457 | 740830 | 741747 | 699496 | 700413 | 656390 | 657307 | 815995 | 815078 | 1673657 | 1672740 | 243863 | 244780 | 589945 | 590862 |
| 876 BPSS0821 | 16 | 701860 | 702759 | 714463 | 715362 | 741753 | 742652 | 700419 | 701318 | 657313 | 658212 | 815072 | 814173 | 1672734 | 1671835 | 244786 | 245685 | 590868 | 591767 |
| 877 BPSS0822 | 16 | 702759 | 704369 | 715362 | 716972 | 742652 | 744262 | 701318 | 702928 | 658212 | 659822 | 814173 | 812563 | 1671835 | 1670225 | 245685 | 247295 | 591767 | 593377 |
| 878 BPSS0823 | 16 | 704365 | 705255 | 716968 | 717858 | 744258 | 745148 | 702924 | 703814 | 659818 | 660708 | 812567 | 811677 | 1670229 | 1669339 | 247291 | 248181 | 593373 | 594263 |

|     |                                      |    |         |         |         |         |         |         |         |         |         |         |        |        |         |         |         |         |        |        |         |         |
|-----|--------------------------------------|----|---------|---------|---------|---------|---------|---------|---------|---------|---------|---------|--------|--------|---------|---------|---------|---------|--------|--------|---------|---------|
| 880 | BPSS0825                             | 16 | 705929  | 705225  | 718532  | 717828  | 745822  | 745118  | 704488  | 703784  | 661382  | 660678  | 811003 | 811707 | 1668665 | 1669369 | 248855  | 248151  |        |        | 594937  | 594233  |
| 881 | BPSS0826                             | 16 | 705941  | 707095  | 718544  | 719698  | 745834  | 746988  | 704500  | 705654  | 661394  | 662548  | 810991 | 809837 | 1668653 | 1667499 | 248867  | 250021  |        |        | 594949  | 596103  |
| 882 | BPSS0827                             | 16 | 708108  | 710042  | 720711  | 722645  | 748001  | 749935  | 706667  | 708601  | 663561  | 665495  | 808838 | 806904 | 1666500 | 1664566 | 251020  | 252954  |        |        | 597102  | 599036  |
| 883 | BPSS0828                             | 16 | 710672  | 710337  | 723008  | 722940  | 750565  | 750230  | 709231  | 708896  | 666125  | 665790  | 806274 | 806609 | 1666396 | 1664271 | 253584  | 253249  |        |        | 599666  | 599331  |
| 884 | BPSS0829                             | 16 | 712484  | 711321  | 725310  | 724147  | 752377  | 751214  | 711043  | 709880  | 667937  | 666774  | 804462 | 805625 | 1662124 | 1663287 | 255396  | 254233  |        |        | 601478  | 600315  |
| 885 | BPSS0830                             | 16 | 713825  | 713085  | 726651  | 725911  | 753718  | 752978  | 712384  | 711644  | 669278  | 668538  | 803121 | 803861 | 1660783 | 1661523 | 256737  | 255997  |        |        | 602819  | 602079  |
| 886 | BPSS0831                             | 16 | 714197  | 714382  | 727023  | 727208  | 754090  | 754275  | 712756  | 712941  | 669650  | 669835  | 802749 | 802564 | 1660411 | 1660226 | 257109  | 257294  |        |        | 603162  | 603347  |
| 887 | BPSS0832                             | 16 | 715131  | 714646  | 727957  | 727472  | 755024  | 754539  | 713690  | 713205  | 670584  | 670099  | 801815 | 802300 | 1659477 | 1659962 | 258043  | 257558  |        |        | 604096  | 603611  |
| 888 | BPSS0833                             | 16 | 715321  | 715608  | 728147  | 728434  | 755214  | 755501  | 713880  | 714167  | 670774  | 671061  | 801625 | 801338 | 1659287 | 1659000 | 258233  | 258520  |        |        | 604286  | 604573  |
| 889 | BPSS0834                             | 16 | 715673  | 715906  | 728499  | 728732  | 755566  | 755799  | 714232  | 714465  | 671126  | 671359  | 801273 | 801040 | 1658935 | 1658702 | 258585  | 258818  |        |        | 604638  | 604871  |
| 890 | BPSS0835                             | 16 | 716635  | 715991  | 729461  | 728817  | 756528  | 755884  | 715194  | 714550  | 672088  | 671444  | 800311 | 800955 | 1657973 | 1658617 | 259547  | 258903  |        |        | 605600  | 604956  |
| 891 | BPSS0836                             | 16 | 717197  | 717652  | 730023  | 730478  | 757090  | 757545  | 715756  | 716211  | 672650  | 673105  | 799749 | 799294 | 1657411 | 1656956 | 260109  | 260564  |        |        | 606162  | 606617  |
| 892 | Chr2_36_ISBma2_B                     | 16 |         |         |         |         |         |         |         |         |         |         | 797475 | 799047 | 1655136 | 1656709 | 260811  | 262383  |        |        |         |         |
| 893 | BPSS0837                             | 16 | 718861  | 718025  | 731687  | 730851  | 758754  | 757918  | 717420  | 716584  | 674314  | 673478  | 796487 | 797095 | 1654148 | 1654756 | 263370  | 262534  |        |        | 607826  | 606990  |
| 894 | BPSS0838                             | 16 | 719352  | 718861  | 732178  | 731687  | 759245  | 758754  | 717911  | 717420  | 674805  | 674314  | 795996 | 796487 | 1653657 | 1654148 | 263861  | 263370  |        |        | 608317  | 607826  |
| 895 | BPSS0839                             | 16 | 720373  | 719537  | 733199  | 732363  | 760266  | 759430  | 718932  | 718096  | 675826  | 674990  | 794975 | 795811 | 1652636 | 1653472 | 264882  | 264046  |        |        | 609338  | 608502  |
| 896 | BPSS0840                             | 16 | 720623  | 721660  | 733449  | 734486  | 760516  | 761553  | 719182  | 720219  | 676076  | 677113  | 794725 | 793688 | 1652386 | 1651349 | 265132  | 266169  |        |        | 609588  | 610625  |
| 897 | BPSS0841                             | 16 | 722144  | 723187  | 734970  | 736013  | 762037  | 763080  | 720703  | 721746  | 677583  | 678626  | 793218 | 792175 | 1650879 | 1649836 | 266639  | 267682  |        |        | 611095  | 612138  |
| 898 | BPSS0842                             | 16 | 723379  | 724584  | 736205  | 737410  | 763272  | 764477  | 721938  | 723143  | 678818  | 680023  | 791983 | 790778 | 1649644 | 1648439 | 267874  | 269079  |        |        | 612330  | 613535  |
| 899 | BPSS0843                             | 16 | 725007  | 725765  | 737833  | 738591  | 764900  | 765658  | 723566  | 724324  | 680446  | 681204  | 790355 | 789597 | 1648016 | 1647258 | 269502  | 270260  |        |        | 613958  | 614716  |
| 900 | BPSS0844                             | 16 | 725784  | 726650  | 738610  | 739476  | 765677  | 766543  | 724343  | 725209  | 681223  | 682089  | 789578 | 788712 | 1647239 | 1646373 | 270279  | 271145  |        |        | 614735  | 615601  |
| 901 | BPSS0845                             | 16 | 727563  | 728945  | 740389  | 741771  | 767456  | 768838  | 726122  | 727504  | 683002  | 684384  | 787793 | 786411 | 1645460 | 1644078 | 272058  | 273440  |        |        | 616514  | 617896  |
| 902 | BPSS0845a                            | 16 | 729744  | 729505  | 742570  | 742331  | 769637  | 769398  | 728303  | 728064  | 685183  | 684944  | 785612 | 785851 | 1643279 | 1643518 | 274239  | 274000  |        |        | 618695  | 618456  |
| 903 | BPSS0846                             | 16 | 729889  | 730182  | 742715  | 743008  | 769782  | 770075  | 728448  | 728741  | 685328  | 685621  | 785467 | 785174 | 1643134 | 1642841 | 274384  | 274677  |        |        | 618840  | 619133  |
| 904 | BPSS0847                             | 16 | 731895  | 730582  | 744721  | 743408  | 771788  | 770475  | 730454  | 729141  | 687334  | 686021  | 783461 | 784774 | 1641128 | 1642441 | 276391  | 275465  |        |        | 620846  | 619533  |
| 905 | BPSS0848                             | 16 | 732814  | 732320  | 745640  | 745146  | 772707  | 772213  | 731373  | 730879  | 688253  | 687759  | 782542 | 783036 | 1640209 | 1640703 | 277310  | 276816  |        |        | 621765  | 621271  |
| 906 | BPSS0849                             | 16 | 733852  | 732935  | 746678  | 745761  | 773745  | 772828  | 732411  | 731494  | 689291  | 688374  | 781504 | 782421 | 1639171 | 1640088 | 278348  | 277431  |        |        | 622803  | 621886  |
| 907 | Chr2_37_IS407A_A                     |    | 733880  | 735115  | 746706  | 747941  | 773773  | 775008  | 732439  | 733674  | 689319  | 690554  | 780241 | 781476 | 1637908 | 1639143 | 278376  | 279611  |        |        | 622831  | 624066  |
| 908 | BPSS0850                             |    |         |         |         |         |         |         |         |         |         |         |        |        |         |         |         |         |        |        |         |         |
| 909 | BPSS0851                             |    |         |         |         |         |         |         |         |         |         |         |        |        |         |         |         |         |        |        |         |         |
| 910 | BPSS0852                             |    |         |         |         |         |         |         |         |         |         |         |        |        |         |         |         |         |        |        |         |         |
| 911 | BPSS0853                             |    |         |         |         |         |         |         |         |         |         |         |        |        |         |         |         |         |        |        |         |         |
| 912 | BPSS0854                             |    |         |         |         |         |         |         |         |         |         |         |        |        |         |         |         |         |        |        |         |         |
| 913 | BPSS0855                             |    |         |         |         |         |         |         |         |         |         |         |        |        |         |         |         |         |        |        |         |         |
| 914 | Chr2_38_IS407A_A                     |    | 1480359 | 1481594 | 1507138 | 1508373 | 1468774 | 1470009 | 1474062 | 1475297 | 1160971 | 1162206 | 675587 | 676822 | 878410  | 879645  | 1036615 | 1037850 | 379739 | 380974 | 1013932 | 1015167 |
| 915 | BPSS0856                             | 17 | 1480357 | 1478750 | 1507136 | 1505529 | 1468772 | 1467165 | 1474060 | 1472453 | 1160969 | 1159362 | 675585 | 673978 | 879647  | 881254  | 1036613 | 1035006 | 379737 | 378130 | 1015169 | 1016776 |
| 916 | BPSS0857                             | 17 | 1478712 | 1478089 | 1505491 | 1504868 | 1467127 | 1466504 | 1472415 | 1471792 | 1159324 | 1158044 | 673940 | 672660 | 881292  | 882572  | 1034968 | 1033688 | 378092 | 376812 | 1016814 | 1018094 |
| 917 | BPSS0858_N-carbamoyl-L-amino acid hy | 17 |         |         |         |         |         |         |         |         |         |         |        |        |         |         |         |         |        |        |         |         |
| 918 | BPSS0860                             | 17 | 1476659 | 1475139 | 1503438 | 1501918 | 1465074 | 1463554 | 1470362 | 1468842 | 1157266 | 1155746 | 671882 | 670362 | 883350  | 884870  | 1032910 | 1031390 | 376034 | 374514 | 1018872 | 1020392 |
| 919 | BPSS0861                             | 17 | 1473840 | 1474736 | 1500619 | 1501515 | 1462255 | 1463151 | 1467543 | 1468439 | 1154447 | 1155343 | 669063 | 669959 | 886169  | 885273  | 1030091 | 1030987 | 373215 | 374111 | 1021691 | 1020795 |
| 920 | BPSS0862                             | 17 | 1473750 | 1473055 | 1500529 | 1499834 | 1462165 | 1461470 | 1467453 | 1466758 | 1154357 | 1153662 | 668973 | 668278 | 886259  | 886954  | 1030001 | 1029306 | 373125 | 372430 | 1021781 | 1022476 |
| 921 | BPSS0863                             | 17 | 1473076 | 1472756 | 1499855 | 1499535 | 1461491 | 1461171 | 1466779 | 1466459 | 1153683 | 1153363 | 668299 | 667979 | 886933  | 887253  | 1029327 | 1029007 | 372451 | 372131 | 1022455 | 1022742 |
| 922 | Chr2_39_IS407A_C                     | 17 |         |         |         |         |         |         |         |         |         |         |        |        |         |         |         |         |        |        | 1023389 | 1024624 |
| 923 | BPSS0864                             | 17 | 1472422 | 1471478 | 1499201 | 1498257 | 1460837 | 1459893 | 1466125 | 1465181 | 1153029 | 1152085 | 667645 | 666701 | 887587  | 888531  | 1028673 | 1027729 | 371797 | 370853 | 1390218 | 1389274 |
| 924 | BPSS0865                             | 17 | 1470993 | 1470130 | 1497773 | 1496910 | 1459408 | 1458545 | 1464696 | 1463833 | 1151591 | 1150728 | 666189 | 665326 | 888998  | 889861  | 1027226 | 1026363 | 370269 | 369406 | 1388834 | 1387971 |
| 925 | BPSS0866                             | 17 | 1470052 | 1469300 | 1496832 | 1496080 | 1458467 | 1457715 | 1463755 | 1463003 | 1150650 | 1149898 | 665248 | 664496 | 889939  | 890691  | 1026285 | 1025533 | 369328 | 368576 | 1387893 | 1387141 |
| 926 | BPSS0867                             | 17 | 1468854 | 1468150 | 1495634 | 1494930 | 1457269 | 1456565 | 1462557 | 1461853 | 1149452 | 1148748 | 664050 | 663346 | 891116  | 891820  | 1025108 | 1024404 | 368123 | 367419 | 1386688 | 1385984 |
| 927 | BPSS0868                             | 17 | 1467890 | 1466391 | 1494670 | 1493171 | 1456305 | 1454806 | 1461593 | 1460094 | 1148488 | 1146989 | 663086 | 661587 | 892080  | 893579  | 1024144 | 1022645 | 367159 | 365660 | 1385724 | 1385248 |
| 928 | BPSS0869                             | 17 | 1466350 | 1465004 | 1493130 | 1491784 | 1454765 | 1453419 | 1460053 | 1458707 | 1146948 | 1145602 | 661546 | 660200 | 893620  | 894966  | 1022604 | 1021258 | 365619 | 364273 | 1384481 | 1383135 |
| 929 | BPSS0870                             | 17 | 1464792 | 1463305 | 1491572 | 1490085 | 1453207 | 1451720 | 1458495 | 1457008 | 1145390 | 1143954 | 659988 | 658501 | 895178  | 896665  | 1021046 | 1019559 | 364061 | 362574 | 1382923 | 1381436 |
| 930 | BPSS0871                             | 17 | 1463305 | 1462688 | 1490085 | 1489468 | 1451720 | 1451103 | 1457008 | 1456391 | 1143851 | 1143408 | 658501 | 657884 | 896665  | 897282  | 1019559 | 1018942 | 362574 | 361957 | 1381436 | 1380819 |

|     |          |    |         |         |         |         |         |         |         |         |         |         |        |        |        |        |         |         |        |        |         |         |
|-----|----------|----|---------|---------|---------|---------|---------|---------|---------|---------|---------|---------|--------|--------|--------|--------|---------|---------|--------|--------|---------|---------|
| 931 | BPSS0872 | 17 | 1462688 | 1461672 | 1489468 | 1488452 | 1451103 | 1450087 | 1456391 | 1455375 | 1143408 | 1142392 | 657884 | 656868 | 897282 | 898298 | 1018942 | 1017926 | 361957 | 360941 | 1380819 | 1379803 |
| 932 | BPSS0873 | 17 | 1461439 | 1460240 | 1488219 | 1487020 | 1449854 | 1448655 | 1455142 | 1453943 | 1142159 | 1140960 | 656635 | 655436 | 898531 | 899730 | 1017693 | 1016494 | 360708 | 359509 | 1379570 | 1378371 |
| 933 | BPSS0874 | 17 | 1459973 | 1459773 | 1486753 | 1486553 | 1448388 | 1448188 | 1453676 | 1453476 | 1140693 | 1140493 | 655169 | 654969 | 899997 | 900197 | 1016227 | 1016027 | 359242 | 359042 | 1378104 | 1377904 |
| 934 | BPSS0875 | 17 | 1458946 | 1459554 | 1485726 | 1486334 | 1447361 | 1447969 | 1452649 | 1453257 | 1139666 | 1140274 | 654142 | 654750 | 901024 | 900416 | 1015200 | 1015808 | 358215 | 358823 | 1377077 | 1377685 |
| 935 | BPSS0876 | 17 | 1458774 | 1458298 | 1485554 | 1485078 | 1447189 | 1446713 | 1452477 | 1452001 | 1139494 | 1139018 | 653970 | 653494 | 901196 | 901672 | 1015028 | 1014552 | 358043 | 357567 | 1376905 | 1376429 |
| 936 | BPSS0877 | 17 | 1457093 | 1458151 | 1483873 | 1484931 | 1445508 | 1446566 | 1450796 | 1451854 | 1137813 | 1138871 | 652289 | 653347 | 902877 | 901819 | 1013347 | 1014405 | 356362 | 357420 | 1375224 | 1376282 |
| 937 | BPSS0878 | 17 | 1456738 | 1457040 | 1483518 | 1483820 | 1445153 | 1445455 | 1450441 | 1450743 | 1137458 | 1137760 | 651934 | 652236 | 903232 | 902930 | 1012992 | 1013294 | 356007 | 356309 | 1374869 | 1375171 |
| 938 | BPSS0879 | 17 | 1455408 | 1454281 | 1482188 | 1481061 | 1443823 | 1443551 | 1449111 | 1447984 | 1136128 | 1135001 | 650604 | 649477 | 904562 | 905689 | 1011662 | 1010535 | 354677 | 353550 | 1373539 | 1372412 |
| 939 | BPSS0880 | 17 | 1453650 | 1454057 | 1480430 | 1480837 | 1442066 | 1442473 | 1447353 | 1447760 | 1134370 | 1134777 | 648846 | 649253 | 906320 | 905913 | 1009904 | 1010311 | 352919 | 353326 | 1371781 | 1372188 |
| 940 | BPSS0881 | 17 | 1453142 | 1452804 | 1479922 | 1479584 | 1441558 | 1441220 | 1446845 | 1446507 | 1133862 | 1133524 | 648338 | 648000 | 906828 | 907166 | 1009396 | 1009058 | 352411 | 352073 | 1371273 | 1370935 |
| 941 | BPSS0882 | 17 | 1452132 | 1452593 | 1478912 | 1479373 | 1440548 | 1441009 | 1445835 | 1446296 | 1132852 | 1133313 | 647328 | 647789 | 907838 | 907377 | 1008386 | 1008847 | 351401 | 351862 | 1370263 | 1370724 |
| 942 | BPSS0883 | 17 | 1451955 | 1451305 | 1478735 | 1478085 | 1440371 | 1439721 | 1445658 | 1445008 | 1132675 | 1132025 | 647151 | 646501 | 908015 | 908665 | 1008209 | 1007559 | 351224 | 350574 | 1370086 | 1369436 |
| 943 | BPSS0884 | 17 | 1450491 | 1451336 | 1477271 | 1478116 | 1438907 | 1439752 | 1444194 | 1445039 | 1131211 | 1132056 | 645687 | 646532 | 909479 | 908634 | 1006745 | 1007590 | 349760 | 350605 | 1368622 | 1369467 |
| 944 | BPSS0885 | 17 | 1449818 | 1450426 | 1476598 | 1477206 | 1438234 | 1438842 | 1443521 | 1444129 | 1130538 | 1131146 | 645014 | 645622 | 910152 | 909544 | 1006072 | 1006680 | 349087 | 349695 | 1367949 | 1368557 |
| 945 | BPSS0886 | 17 | 1449150 | 1449590 | 1475930 | 1476370 | 1437566 | 1438006 | 1442853 | 1443293 | 1129870 | 1130310 | 644346 | 644786 | 910380 | 910380 | 1005404 | 1005844 | 348419 | 348859 | 1367281 | 1367721 |
| 946 | BPSS0887 | 17 | 1449076 | 1448360 | 1475856 | 1475140 | 1437492 | 1436776 | 1442779 | 1442063 | 1129796 | 1129080 | 644272 | 643556 | 910894 | 911610 | 1005330 | 1004614 | 348345 | 347629 | 1367207 | 1366491 |
| 947 | BPSS0888 | 17 | 1447605 | 1448318 | 1474385 | 1475098 | 1436021 | 1436734 | 1441308 | 1442021 | 1128325 | 1129038 | 642801 | 643514 | 912365 | 911652 | 1003859 | 1004572 | 346874 | 347587 | 1365736 | 1366449 |
| 948 | BPSS0889 | 17 | 1445706 | 1446908 | 1472486 | 1473688 | 1434122 | 1435324 | 1439409 | 1440611 | 1126118 | 1127320 | 640916 | 642118 | 914313 | 913111 | 1001897 | 1003099 | 344856 | 346058 | 1363648 | 1364850 |
| 949 | BPSS0890 | 17 | 1445060 | 1445641 | 1471840 | 1472421 | 1433476 | 1434057 | 1438763 | 1439344 | 1125472 | 1126053 | 640270 | 640851 | 914959 | 914378 | 1001251 | 1001832 | 344210 | 344698 | 1363002 | 1363583 |
| 950 | BPSS0891 | 17 | 1444927 | 1444304 | 1471707 | 1471084 | 1433343 | 1432720 | 1438630 | 1438007 | 1125339 | 1124716 | 640137 | 639514 | 915092 | 915715 | 1001118 | 1000495 | 344077 | 343454 | 1362869 | 1362246 |
| 951 | BPSS0892 | 17 | 1444214 | 1443267 | 1470994 | 1470047 | 1432630 | 1431683 | 1437917 | 1436970 | 1124626 | 1123679 | 639424 | 638477 | 915805 | 916752 | 1000405 | 999458  | 343364 | 342417 | 1362156 | 1361209 |
| 952 | BPSS0893 | 17 | 1441868 | 1442953 | 1468648 | 1469733 | 1430284 | 1431369 | 1435571 | 1436656 | 1122280 | 1123365 | 637078 | 638163 | 918151 | 917066 | 998059  | 999144  | 341018 | 342103 | 1359810 | 1360895 |
| 953 | BPSS0894 | 17 | 1441433 | 1441119 | 1468213 | 1467899 | 1429849 | 1429535 | 1435136 | 1434822 | 1121845 | 1121531 | 636643 | 636329 | 918586 | 918900 | 997624  | 997310  | 340583 | 340269 | 1359375 | 1359061 |
| 954 | BPSS0895 | 17 | 1441114 | 1440806 | 1467894 | 1467586 | 1429530 | 1429222 | 1434817 | 1434509 | 1121526 | 1121218 | 636324 | 636016 | 918905 | 919213 | 997305  | 996997  | 340264 | 339956 | 1359056 | 1358748 |
| 955 | BPSS0896 | 17 | 1440768 | 1439704 | 1467548 | 1466484 | 1429184 | 1428120 | 1434471 | 1433407 | 1121180 | 1120116 | 635978 | 634914 | 919251 | 920315 | 996959  | 995895  | 339918 | 338854 | 1358710 | 1357646 |
| 956 | BPSS0897 | 17 | 1439692 | 1438937 | 1466472 | 1465717 | 1428108 | 1427353 | 1433395 | 1432640 | 1120104 | 1119349 | 634902 | 634147 | 920327 | 921082 | 995883  | 995128  | 338842 | 338087 | 1357634 | 1356879 |
| 957 | BPSS0898 | 17 | 1438910 | 1438371 | 1465690 | 1465151 | 1427326 | 1426787 | 1432613 | 1432074 | 1119322 | 1118783 | 634120 | 633581 | 921109 | 921648 | 995101  | 994562  | 338060 | 337521 | 1356852 | 1356313 |
| 958 | BPSS0899 | 17 | 1438351 | 1437449 | 1465131 | 1464229 | 1426767 | 1425865 | 1432054 | 1431152 | 1118763 | 1117861 | 633561 | 632659 | 921668 | 922570 | 994542  | 993640  | 337501 | 336599 | 1356293 | 1355391 |
| 959 | BPSS0900 | 17 | 1437449 | 1436598 | 1464229 | 1463378 | 1425865 | 1425014 | 1431152 | 1430301 | 1117861 | 1117010 | 632659 | 631808 | 922570 | 923421 | 993640  | 992789  | 336599 | 335748 | 1355391 | 1354540 |
| 960 | BPSS0901 | 17 | 1436598 | 1435804 | 1463378 | 1462584 | 1425014 | 1424220 | 1430301 | 1429507 | 1117010 | 1116216 | 631808 | 631014 | 923421 | 924215 | 992789  | 991995  | 335748 | 334954 | 1354540 | 1353746 |
| 961 | BPSS0902 | 17 | 1435808 | 1434126 | 1462588 | 1460906 | 1424224 | 1422542 | 1429511 | 1427829 | 1116220 | 1114526 | 631018 | 629348 | 924211 | 925881 | 991999  | 990329  | 334958 | 333276 | 1353299 | 1352067 |
| 962 | BPSS0903 | 17 | 1434130 | 1433318 | 1460910 | 1460098 | 1422546 | 1421734 | 1427833 | 1427021 | 1114530 | 1113718 | 629352 | 628540 | 925877 | 926689 | 990333  | 989521  | 333280 | 332468 | 1352071 | 1351259 |
| 963 | BPSS0904 | 17 | 1433289 | 1431802 | 1460069 | 1458582 | 1421705 | 1420218 | 1426992 | 1425505 | 1113689 | 1112202 | 628511 | 627024 | 926718 | 928205 | 989492  | 988005  | 332439 | 330952 | 1351230 | 1349743 |
| 964 | BPSS0905 | 17 | 1431782 | 1430820 | 1458562 | 1457600 | 1420198 | 1419236 | 1425485 | 1424523 | 1112182 | 1111220 | 627004 | 626042 | 928225 | 929187 | 987985  | 987023  | 330932 | 329970 | 1349723 | 1348761 |
| 965 | BPSS0906 | 17 | 1430791 | 1429580 | 1457571 | 1456360 | 1419207 | 1417996 | 1424494 | 1423283 | 1111191 | 1109980 | 626013 | 624802 | 929216 | 930427 | 986994  | 985783  | 329941 | 328730 | 1348732 | 1347521 |
| 966 | BPSS0907 | 17 | 1429542 | 1428139 | 1456322 | 1454919 | 1417958 | 1416555 | 1423245 | 1421842 | 1109942 | 1108539 | 624764 | 623361 | 930465 | 931868 | 985745  | 984342  | 328692 | 327289 | 1347483 | 1346080 |
| 967 | BPSS0908 | 17 | 1427431 | 1425119 | 1454211 | 1451899 | 1415847 | 1413535 | 1421134 | 1418822 | 1107831 | 1105519 | 622653 | 620341 | 932576 | 934888 | 983634  | 981322  | 326581 | 324269 | 1345372 | 1343060 |
| 968 | BPSS0909 | 17 | 1425057 | 1424230 | 1451837 | 1451010 | 1413473 | 1412646 | 1418760 | 1417933 | 1105457 | 1104630 | 620279 | 619452 | 934950 | 935777 | 981260  | 980433  | 324207 | 323380 | 1342998 | 1342171 |
| 969 | BPSS0910 | 17 | 1423632 | 1424063 | 1450412 | 1450843 | 1412048 | 1412479 | 1417335 | 1417766 | 1104032 | 1104463 | 618854 | 619285 | 936375 | 935944 | 979835  | 980266  | 322782 | 323213 | 1341573 | 1342004 |
| 970 | BPSS0911 | 17 | 1423098 | 1421608 | 1449878 | 1448388 | 1411514 | 1410024 | 1416801 | 1415311 | 1103498 | 1102008 | 618320 | 616830 | 936909 | 938399 | 979301  | 977811  | 322257 | 320767 | 1341039 | 1339549 |
| 971 | BPSS0912 | 17 | 1420958 | 1421437 | 1447738 | 1448217 | 1409374 | 1409853 | 1414661 | 1415140 | 1101358 | 1101837 | 616180 | 616659 | 939049 | 938570 | 977161  | 977640  | 320117 | 320596 | 1338899 | 1339378 |
| 972 | BPSS0913 | 17 | 1420770 | 1419472 | 1447550 | 1446252 | 1409186 | 1407888 | 1414473 | 1413175 | 1101170 | 1099872 | 615992 | 614694 | 939237 | 940535 | 976973  | 975675  | 319929 | 318631 | 1338711 | 1337413 |
| 973 | BPSS0914 | 17 | 1419077 | 1419298 | 1445857 | 1446078 | 1407493 | 1407714 | 1412780 | 1413001 | 1099477 | 1099698 | 614299 | 614520 | 940930 | 940709 | 975280  | 975501  | 318236 | 318457 | 1337018 | 1337239 |
| 974 | BPSS0915 | 17 | 1418640 | 1417942 | 1445420 | 1444722 | 1407056 | 1406358 | 1412343 | 1411645 | 1099040 | 1098342 | 613862 | 613164 | 941367 | 942065 | 974843  | 974145  | 317799 | 317101 | 1336581 | 1335883 |
| 975 | BPSS0916 | 17 | 1417822 | 1416953 | 1444602 | 1443733 | 1406238 | 1405369 | 1411525 | 1410656 | 1098222 | 1097353 | 613044 | 612175 | 942185 | 943054 | 974025  | 973156  | 316981 | 316112 | 1335763 | 1334894 |
| 976 | BPSS0917 | 17 | 1416654 | 1416100 | 1443434 | 1442880 | 1405070 | 1404516 | 1410357 | 1409803 | 1097054 | 1096500 | 611876 | 611322 | 943353 | 943907 | 972857  | 972303  | 315813 | 315259 | 1334595 | 1334041 |
| 977 | BPSS0918 | 17 | 1415516 | 1415974 | 1442296 | 1442754 | 1403932 | 1404390 | 1409219 | 1409677 | 1095916 | 1096374 | 610738 | 611196 | 944491 | 944033 | 971719  | 9       |        |        |         |         |

|               |                  |    |         |         |         |         |         |         |         |         |         |         |        |        |         |         |        |        |         |         |         |         |
|---------------|------------------|----|---------|---------|---------|---------|---------|---------|---------|---------|---------|---------|--------|--------|---------|---------|--------|--------|---------|---------|---------|---------|
| 982 BPSS0922  |                  | 17 |         |         |         |         |         |         |         |         | 607937  | 606687  | 947292 | 948542 | 968918  | 967668  |        |        |         |         |         |         |
| 983 BPSS0923  |                  | 17 |         |         |         |         |         |         |         |         | 605150  | 606100  | 950079 | 949129 | 966131  | 967081  |        |        |         |         |         |         |
| 984 BPSS0924  |                  | 17 |         |         |         |         |         |         |         |         | 604224  | 605135  | 951005 | 950094 | 965205  | 966116  |        |        |         |         |         |         |
| 985 BPSS0925  |                  | 17 |         |         |         |         |         |         |         |         | 603301  | 604224  | 951928 | 951005 | 964282  | 965205  |        |        |         |         |         |         |
| 986           | Chr2_41_IS407A_B | 17 | 1412717 | 1413952 | 1439497 | 1440732 | 1401133 | 1402368 | 1406420 | 1407655 | 1093117 | 1094352 |        |        |         |         | 311876 | 313111 | 1330658 | 1331893 |         |         |
| 987 BPSS0926  |                  | 17 | 1412128 | 1412715 | 1438908 | 1439495 | 1400544 | 1401131 | 1405831 | 1406418 | 1092528 | 1093115 | 601684 | 603270 | 953545  | 951959  | 962665 | 964251 | 311287  | 311874  | 1330069 | 1330656 |
| 988 BPSS0927  |                  | 17 | 1411232 | 1411879 | 1438012 | 1438659 | 1399648 | 1400295 | 1404935 | 1405582 | 1091632 | 1092279 | 600788 | 601435 | 954441  | 953794  | 961769 | 962416 | 310391  | 311038  | 1329173 | 1329820 |
| 989 BPSS0928  |                  | 17 | 1410062 | 1411042 | 1436842 | 1437822 | 1398478 | 1399458 | 1403765 | 1404745 | 1090462 | 1091442 | 599618 | 600598 | 955611  | 954631  | 960599 | 961579 | 309221  | 310201  | 1328003 | 1328983 |
| 990 BPSS0929  |                  | 17 | 1409131 | 1409934 | 1435911 | 1436714 | 1397547 | 1398350 | 1402834 | 1403637 | 1089531 | 1090334 | 598687 | 599490 | 956542  | 955739  | 959668 | 960471 | 308290  | 309093  | 1327072 | 1327875 |
| 991 BPSS0930  |                  | 17 | 1408486 | 1409049 | 1435266 | 1435829 | 1396902 | 1397465 | 1402189 | 1402752 | 1088886 | 1089449 | 598042 | 598605 | 957187  | 956624  | 959023 | 959586 | 307645  | 308208  | 1326427 | 1326990 |
| 992 BPSS0931  |                  | 17 | 1407765 | 1406971 | 1434143 | 1433349 | 1396181 | 1395387 | 1401468 | 1400674 | 1088165 | 1087371 | 597321 | 596527 | 957908  | 958702  | 958302 | 957508 | 306924  | 306130  | 1325706 | 1324912 |
| 993 BPSS0932  |                  | 17 | 1405419 | 1406930 | 1431797 | 1433308 | 1393835 | 1395346 | 1399122 | 1400633 | 1085819 | 1087330 | 594975 | 596486 | 960254  | 958743  | 955956 | 957467 | 304578  | 306089  | 1323360 | 1324871 |
| 994 BPSS0933  |                  | 17 | 1405169 | 1403628 | 1431547 | 1430006 | 1393585 | 1392044 | 1398872 | 1397331 | 1085569 | 1084028 | 594725 | 593184 | 960504  | 962045  | 955706 | 954165 | 304328  | 302787  | 1323110 | 1321569 |
| 995 BPSS0934  |                  | 17 | 1401728 | 1403389 | 1428106 | 1429767 | 1390144 | 1391805 | 1395403 | 1397064 | 1082128 | 1083789 | 591284 | 592945 | 963945  | 962284  | 952265 | 953926 | 300887  | 302548  | 1319669 | 1321330 |
| 996 BPSS0935  |                  | 17 | 1400177 | 1401082 | 1426555 | 1427460 | 1388593 | 1389498 | 1393852 | 1394757 | 1080577 | 1081482 | 589733 | 590638 | 965496  | 964591  | 950714 | 951619 | 299336  | 300241  | 1318118 | 1319023 |
| 997 BPSS0936  |                  | 17 | 1399998 | 1398673 | 1426376 | 1425051 | 1388414 | 1388217 | 1393673 | 1392348 | 1080398 | 1079073 | 589554 | 588229 | 965675  | 967000  | 950535 | 949210 | 299157  | 297832  | 1317939 | 1316614 |
| 998 BPSS0937  |                  | 17 | 1398402 | 1397296 | 1424780 | 1423674 | 1386817 | 1385711 | 1392077 | 1390971 | 1078802 | 1077696 | 587958 | 586852 | 967271  | 968377  | 948939 | 947833 | 297561  | 296455  | 1316343 | 1315237 |
| 999 BPSS0938  |                  | 17 | 1396349 | 1397236 | 1422727 | 1423614 | 1384764 | 1385651 | 1390024 | 1390911 | 1076749 | 1077636 | 585905 | 586792 | 969324  | 968437  | 946886 | 947773 | 295508  | 296395  | 1314431 | 1314787 |
| 1000 BPSS0939 |                  | 17 | 1395966 | 1395571 | 1422344 | 1422087 | 1384381 | 1383986 | 1389641 | 1389246 | 1076366 | 1075971 | 585522 | 585127 | 969707  | 970102  | 946503 | 946108 | 295125  | 294203  | 1314048 | 1313689 |
| 1001 BPSS0940 |                  | 17 | 1394952 | 1394008 | 1420470 | 1419526 | 1383345 | 1382413 | 1388627 | 1387683 | 1075424 | 1074966 | 584524 | 583580 | 970705  | 971649  | 945465 | 944521 | 294055  | 293111  | 1313202 | 1312258 |
| 1002 BPSS0941 |                  | 17 | 1393161 | 1394030 | 1418679 | 1419548 | 1381566 | 1382435 | 1386836 | 1387705 | 1073668 | 1074537 | 582733 | 583602 | 972496  | 971627  | 943674 | 944543 | 292264  | 293133  | 1311411 | 1312280 |
| 1003 BPSS0942 |                  | 17 | 1391969 | 1393120 | 1417487 | 1418638 | 1380374 | 1381525 | 1385644 | 1386795 | 1072476 | 1073627 | 581541 | 582692 | 973688  | 972537  | 942482 | 943633 | 291072  | 292223  | 1310219 | 1311370 |
| 1004 BPSS0943 |                  | 17 | 1391548 | 1390397 | 1417066 | 1415915 | 1379953 | 1378802 | 1385223 | 1384072 | 1072055 | 1070904 | 581120 | 579969 | 974109  | 975260  | 942061 | 940910 | 290651  | 289500  | 1309798 | 1308647 |
| 1005 BPSS0944 |                  | 17 | 1388981 | 1389889 | 1414499 | 1415407 | 1377386 | 1378294 | 1382656 | 1383564 | 1069488 | 1070396 | 578553 | 579461 | 976676  | 975768  | 939635 | 940543 | 288084  | 288992  | 1307231 | 1308139 |
| 1006 BPSS0945 |                  | 17 | 1388363 | 1387419 | 1413881 | 1413366 | 1376768 | 1375824 | 1382038 | 1381094 | 1068870 | 1067926 | 577935 | 576991 | 977294  | 978238  | 939017 | 938073 | 287466  | 286522  | 1306613 | 1305669 |
| 1007 BPSS0946 |                  | 17 | 1387241 | 1386357 | 1412636 | 1411743 | 1375646 | 1374762 | 1380916 | 1380032 | 1067748 | 1066864 | 576813 | 575929 | 978416  | 979300  | 937895 | 937011 | 286344  | 285460  | 1305490 | 1304606 |
| 1008 BPSS0948 |                  | 17 | 1385623 | 1384754 | 1411017 | 1410148 | 1373303 | 1372434 | 1379298 | 1378429 | 1066130 | 1065261 | 575195 | 574326 | 980034  | 980903  | 936277 | 935408 | 284726  | 283857  | 1303872 | 1303003 |
| 1009 BPSS0949 |                  | 17 | 1384306 | 1384638 | 1409700 | 1410032 | 1371986 | 1372318 | 1377981 | 1378313 | 1064813 | 1065145 | 573878 | 574210 | 981351  | 981019  | 934960 | 935292 | 283409  | 283741  | 1302555 | 1302887 |
| 1010 BPSS0950 |                  | 17 | 1382676 | 1383461 | 1408070 | 1408855 | 1370356 | 1371141 | 1376351 | 1377136 | 1063183 | 1063968 | 572248 | 573033 | 982981  | 982196  | 933330 | 934115 | 281779  | 282564  | 1300925 | 1301710 |
| 1011 BPSS0951 |                  | 17 | 1381819 | 1382685 | 1407213 | 1408079 | 1369499 | 1370365 | 1375494 | 1376360 | 1062326 | 1063192 | 571391 | 572257 | 983838  | 982972  | 932473 | 933339 | 280922  | 281788  | 1300068 | 1300934 |
| 1012 BPSS0952 |                  | 17 | 1380876 | 1381814 | 1406270 | 1407208 | 1368556 | 1369494 | 1374551 | 1375489 | 1061383 | 1062321 | 570448 | 571386 | 984781  | 983843  | 931530 | 932468 | 279979  | 280917  | 1299125 | 1300063 |
| 1013 BPSS0953 |                  | 17 | 1379763 | 1380830 | 1405157 | 1406224 | 1367443 | 1368510 | 1373438 | 1374505 | 1060270 | 1061337 | 569335 | 570402 | 985894  | 984827  | 930417 | 931484 | 278866  | 279933  | 1298012 | 1299079 |
| 1014 BPSS0954 |                  | 17 | 1378141 | 1379739 | 1403535 | 1405133 | 1365821 | 1367419 | 1371816 | 1373414 | 1058648 | 1060246 | 567713 | 569311 | 987516  | 985918  | 928795 | 930393 | 277244  | 278842  | 1296390 | 1297988 |
| 1015 BPSS0955 |                  | 17 | 1377423 | 1377989 | 1402817 | 1403383 | 1365103 | 1365669 | 1371098 | 1371664 | 1057930 | 1058496 | 566995 | 567561 | 988234  | 987668  | 928077 | 928643 | 276526  | 277092  | 1295672 | 1296238 |
| 1016 BPSS0956 |                  | 17 | 1376513 | 1377400 | 1401907 | 1402794 | 1364193 | 1365080 | 1370188 | 1371075 | 1057020 | 1057907 | 566085 | 566972 | 989144  | 988257  | 927167 | 928054 | 275616  | 276503  | 1294762 | 1295649 |
| 1017 BPSS0957 |                  | 17 | 1374311 | 1375519 | 1399705 | 1400913 | 1361991 | 1363199 | 1368108 | 1369316 | 1054818 | 1056026 | 563883 | 565091 | 991346  | 990138  | 924965 | 926173 | 273414  | 274622  | 1292571 | 1293779 |
| 1018 BPSS0958 |                  | 17 | 1374021 | 1372039 | 1399415 | 1397433 | 1361701 | 1359719 | 1367818 | 1365836 | 1054528 | 1052546 | 563593 | 561611 | 991636  | 993618  | 924675 | 922693 | 273124  | 271142  | 1292281 | 1290299 |
| 1019 BPSS0959 |                  | 17 | 1371944 | 1371513 | 1397338 | 1396907 | 1359624 | 1359193 | 1365741 | 1365310 | 1052451 | 1052020 | 561516 | 561085 | 993713  | 994144  | 922598 | 922167 | 271047  | 270616  | 1290204 | 1289773 |
| 1020 BPSS0960 |                  | 17 | 1371458 | 1366836 | 1396852 | 1392230 | 1359138 | 1354516 | 1365255 | 1360633 | 1051965 | 1047343 | 561030 | 565408 | 994199  | 998821  | 922112 | 917490 | 270561  | 265939  | 1289718 | 1285096 |
| 1021 BPSS0961 |                  | 17 | 1366826 | 1366350 | 1392220 | 1391744 | 1354506 | 1354030 | 1360623 | 1360147 | 1047333 | 1046857 | 556398 | 555922 | 998831  | 999307  | 917480 | 917004 | 265929  | 265453  | 1285086 | 1284610 |
| 1022 BPSS0962 |                  | 17 | 1365304 | 1361912 | 1390698 | 1387306 | 1352984 | 1349592 | 1359101 | 1355709 | 1045811 | 1042419 | 554876 | 551484 | 1000353 | 1003745 | 915958 | 912566 | 264407  | 261015  | 1283564 | 1280172 |
| 1023 BPSS0963 |                  | 17 | 1361863 | 1361186 | 1387257 | 1386580 | 1349543 | 1348866 | 1355660 | 1354983 | 1042370 | 1041693 | 551435 | 550758 | 1003794 | 1004471 | 912517 | 911840 | 260966  | 260289  | 1280123 | 1279446 |
| 1024 BPSS0964 |                  | 17 | 1359395 | 1360984 | 1384789 | 1386378 | 1347075 | 1348664 | 1353192 | 1354781 | 1039902 | 1041491 | 548967 | 550556 | 1006262 | 1004673 | 910049 | 911638 | 258498  | 260087  | 1277655 | 1279244 |
| 1025 BPSS0965 |                  | 17 | 1359109 | 1357850 | 1384503 | 1383244 | 1346789 | 1345530 | 1352906 | 1351647 | 1039616 | 1038357 | 548681 | 547422 | 1006548 | 1007807 | 909763 | 908504 | 258212  | 256953  | 1277369 | 1276110 |
| 1026 BPSS0966 |                  | 17 | 1357730 | 1356438 | 1383124 | 1381832 | 1345410 | 1344118 | 1351527 | 1350235 | 1038237 | 1036945 | 547302 | 546010 | 1007927 | 1009219 | 908384 | 907092 | 256833  | 255541  | 1275990 | 1274698 |
| 1027 BPSS0967 |                  | 17 | 1355547 | 1355996 | 1380941 | 1381390 | 1343227 | 1343676 | 1349344 | 1349793 | 1036054 | 1036503 | 545119 | 545568 | 1010110 | 1009661 | 906201 | 906650 | 254650  | 255099  | 1273807 | 1274256 |
| 1028 BPSS0968 |                  | 17 | 1354390 | 1355295 | 1379784 | 1380689 | 1342070 | 1342975 | 1348187 | 1349092 | 1034897 | 1035802 | 543962 | 544867 | 1011267 | 1010362 | 905044 | 905949 | 253493  | 254398  | 1272650 | 1273555 |
| 1029 BPSS0969 |                  | 17 | 1352053 | 1354374 | 1377447 | 1379768 | 1339733 | 1342054 | 1345850 | 1348171 | 1032560 | 1034881 | 541625 | 543946 | 1013604 | 1011283 | 902707 | 905028 | 251156  | 253477  | 1270313 | 1272634 |
| 1030 BPSS0970 |                  | 17 | 1351874 | 1350459 | 1377268 | 1375853 | 1339554 | 1338139 | 1345671 | 1344256 | 1032381 | 1030966 | 541446 | 540031 | 1013783 | 1015198 | 902528 | 901113 | 250977  | 249562  |         |         |



|               |                                             |         |         |         |         |         |         |         |         |         |         |        |        |         |         |        |        |        |        |         |         |
|---------------|---------------------------------------------|---------|---------|---------|---------|---------|---------|---------|---------|---------|---------|--------|--------|---------|---------|--------|--------|--------|--------|---------|---------|
| 1033 BPSS0973 | 17                                          | 1346262 | 1349045 | 1371656 | 1374439 | 1333242 | 1336025 | 1340129 | 1342912 | 1026769 | 1029552 | 535834 | 538617 | 1019395 | 1016612 | 896916 | 899699 | 245365 | 248148 | 1264428 | 1267211 |
| 1034 BPSS0974 | 17                                          | 1343903 | 1345519 | 1369297 | 1370913 | 1330883 | 1332499 | 1337770 | 1339386 | 1024410 | 1026026 | 533475 | 535091 | 1021754 | 1020138 | 894557 | 896173 | 243006 | 244622 | 1262069 | 1263685 |
| 1035 BPSS0975 | 17                                          | 1342362 | 1341850 | 1367756 | 1367244 | 1329342 | 1328830 | 1336229 | 1335717 | 1022869 | 1022357 | 531934 | 531422 | 1023295 | 1023807 | 893016 | 892504 | 241465 | 240953 | 1260528 | 1260016 |
| 1036 BPSS0976 | 17                                          | 1341847 | 1340237 | 1367241 | 1365631 | 1328827 | 1327217 | 1335714 | 1334104 | 1022354 | 1020744 | 531419 | 529809 | 1023810 | 1025420 | 892501 | 890891 | 240950 | 239340 | 1260013 | 1258403 |
| 1037 BPSS0977 | 17                                          | 1340189 | 1338879 | 1365583 | 1364273 | 1327169 | 1325859 | 1334056 | 1332746 | 1020696 | 1019386 | 529761 | 528451 | 1025468 | 1026778 | 890843 | 889533 | 239292 | 237982 | 1258355 | 1257045 |
| 1038 BPSS0978 | 17                                          | 1338684 | 1338274 | 1364078 | 1363668 | 1325664 | 1325254 | 1332551 | 1332141 | 1019191 | 1018781 | 528256 | 527846 | 1026973 | 1027383 | 889338 | 888928 | 237787 | 237377 | 1256850 | 1256440 |
| 1039 BPSS0979 | 17                                          | 1338218 | 1337106 | 1363612 | 1362500 | 1325198 | 1324086 | 1332085 | 1330973 | 1018725 | 1017613 | 527790 | 526678 | 1027439 | 1028551 | 888872 | 887760 | 237321 | 236209 | 1256384 | 1255272 |
| 1040 BPSS0980 | 17                                          | 1336101 | 1336901 | 1361495 | 1362295 | 1323081 | 1323881 | 1329968 | 1330768 | 1016608 | 1017408 | 525673 | 526473 | 1029556 | 1028756 | 886755 | 887555 | 235204 | 236004 | 1254267 | 1255067 |
| 1041 BPSS0981 | 17                                          | 1335634 | 1334948 | 1361028 | 1360342 | 1322614 | 1321928 | 1329501 | 1328815 | 1016141 | 1015455 | 525206 | 524520 | 1030023 | 1030709 | 886288 | 885602 | 234737 | 234051 | 1253800 | 1253114 |
| 1042 BPSS0982 | 17                                          | 1334948 | 1334238 | 1360342 | 1359632 | 1321928 | 1321218 | 1328815 | 1328105 | 1015455 | 1014745 | 524520 | 523810 | 1030709 | 1031419 | 885602 | 884892 | 234051 | 233341 | 1253114 | 1252404 |
| 1043 BPSS0983 | 17                                          | 1334166 | 1333402 | 1359560 | 1358796 | 1321146 | 1320382 | 1328033 | 1327269 | 1014673 | 1013909 | 523738 | 522974 | 1031491 | 1032255 | 884820 | 884056 | 232629 | 232505 | 1252332 | 1251568 |
| 1044 BPSS0984 | 17                                          | 1332034 | 1333332 | 1357192 | 1358490 | 1319009 | 1320307 | 1325900 | 1327198 | 1012539 | 1013837 | 521605 | 522903 | 1033624 | 1032326 | 882687 | 883985 | 231136 | 232434 | 1250198 | 1251496 |
| 1045 BPSS0985 | 17                                          | 1331793 | 1331302 | 1356951 | 1356460 | 1318768 | 1318277 | 1325659 | 1325168 | 1012298 | 1011807 | 521364 | 520873 | 1033865 | 1034356 | 882446 | 881958 | 230895 | 230404 | 1249957 | 1249466 |
| 1046 BPSS0986 | 17                                          | 1331045 | 1330299 | 1356203 | 1355457 | 1318020 | 1317274 | 1324911 | 1324165 | 1011550 | 1010804 | 520616 | 519870 | 1034613 | 1035359 | 881701 | 880955 | 230147 | 229401 | 1249209 | 1248463 |
| 1047 BPSS0987 | 17                                          | 1329834 | 1330175 | 1354992 | 1355333 | 1316809 | 1317150 | 1323700 | 1324041 | 1010339 | 1010680 | 519405 | 519746 | 1035824 | 1035483 | 880490 | 880831 | 228936 | 229277 | 1247998 | 1248339 |
| 1048 BPSS0988 | 17                                          | 1329199 | 1327943 | 1354357 | 1353101 | 1316174 | 1314918 | 1323065 | 1322385 | 1009704 | 1008448 | 518770 | 517514 | 1036459 | 1037715 | 879855 | 878599 | 228301 | 227045 | 1247363 | 1246107 |
| 1049 BPSS0989 | 17                                          | 1327353 | 1327892 | 1352511 | 1353050 | 1314328 | 1314867 | 1321196 | 1321735 | 1007858 | 1008397 | 516924 | 517463 | 1038305 | 1037766 | 878009 | 878548 | 226455 | 226994 | 1245517 | 1246056 |
| 1050 BPSS0990 | 17                                          | 1326758 | 1325742 | 1351916 | 1350900 | 1313733 | 1312717 | 1320601 | 1319585 | 1007263 | 1006247 | 516336 | 515320 | 1038893 | 1039909 | 877421 | 876405 | 225867 | 224851 | 1244929 | 1243913 |
| 1051          | Chr2_42_IS407A_A                            | 1324421 | 1325656 | 1349579 | 1350814 | 1311687 | 1312631 | 1318264 | 1319499 | 1004926 | 1006161 | 513999 | 515234 | 1039995 | 1041230 | 875084 | 876319 | 223530 | 224765 | 1242592 | 1243827 |
| 1052 BPSS0991 | 17                                          | 1324109 | 1323768 | 1349267 | 1348926 |         |         | 1317952 | 1317611 | 1004614 | 1004273 | 513687 | 513346 | 1041542 | 1041883 | 874772 | 874431 | 223218 | 222877 | 1242280 | 1241939 |
| 1053 BPSS0993 | 17                                          | 1323452 | 1321938 | 1348610 | 1347096 |         |         | 1317295 | 1315781 | 1003957 | 1002443 | 513030 | 511744 | 1042199 | 1043485 | 874115 | 872829 | 222561 | 221047 | 1241623 | 1240109 |
| 1054 BPSS0994 | 17                                          | 1320007 | 1321467 | 1344800 | 1346248 |         |         | 1313876 | 1315315 | 1000520 | 1001980 | 509622 | 511082 | 1045599 | 1044139 | 870699 | 872159 | 219140 | 220600 | 1238307 | 1239605 |
| 1055 BPSS0995 | 17                                          | 1318264 | 1319820 | 1343057 | 1344613 |         |         | 1312133 | 1313689 | 998777  | 1000333 | 507879 | 509435 | 1047342 | 1045786 | 868956 | 870512 | 217397 | 218953 | 1236564 | 1238120 |
| 1056 BPSS0996 | 17                                          | 1317093 | 1318094 | 1341886 | 1342887 |         |         | 1310962 | 1311963 | 997606  | 998607  | 506708 | 507709 | 1048513 | 1047512 | 867785 | 868786 | 216226 | 217227 | 1235393 | 1236394 |
| 1057 BPSS0997 | 17                                          | 1316505 | 1316924 | 1340107 | 1341411 |         |         | 1309183 | 1310487 | 995827  | 997131  | 504929 | 506233 | 1050292 | 1048988 | 866606 | 867310 | 214447 | 215751 | 1233614 | 1234918 |
| 1058 BPSS0998 | 17                                          | 1314028 | 1315269 | 1338821 | 1340062 |         |         | 1307897 | 1309138 | 994541  | 995782  | 503643 | 504884 | 1051578 | 1050337 | 864720 | 865961 | 213161 | 214402 | 1232328 | 1233569 |
| 1059 BPSS0999 | 17                                          | 1313802 | 1314038 | 1338595 | 1338831 |         |         | 1307671 | 1307907 | 994315  | 994551  | 503417 | 503653 | 1051804 | 1051568 | 864494 | 864730 | 212935 | 213171 | 1232102 | 1232338 |
| 1060 BPSS1000 | 17                                          | 1313002 | 1313745 | 1337795 | 1338538 |         |         | 1306871 | 1307614 | 993515  | 994258  | 502617 | 503360 | 1052604 | 1051861 | 863694 | 864437 | 212135 | 212878 | 1231302 | 1232045 |
| 1061 BPSS1001 | 17                                          | 1312195 | 1312962 | 1336988 | 1337755 |         |         | 1306064 | 1306831 | 992708  | 993475  | 501810 | 502577 | 1053411 | 1052644 | 862887 | 863654 | 211328 | 212095 | 1230495 | 1231262 |
| 1062          | Chr2_43_ISBma1_A                            | 1310749 | 1312053 | 1335542 | 1336846 |         |         | 1304618 | 1305922 | 991262  | 992566  | 500364 | 501668 | 1053553 | 1054857 | 861441 | 862745 | 209882 | 211186 | 1229130 | 1230350 |
| 1063 BPSS1002 | Chr2_42_IS407A_A<br>fragmentation by ISBma1 | 1309629 | 1310747 | 1334422 | 1335540 |         |         | 1303498 | 1304616 | 990142  | 991260  | 499244 | 500362 | 1055977 | 1054859 | 860321 | 861439 | 208762 | 209880 | 1227929 | 1229047 |
| 1064 BPSS1003 | 17                                          | 1309179 | 1309514 | 1333972 | 1334307 |         |         | 1303048 | 1303383 | 989692  | 990027  | 498794 | 499129 | 1056427 | 1056092 | 859871 | 860206 | 208312 | 208647 | 1227479 | 1227814 |
| 1065 BPSS1004 | 17                                          | 1307052 | 1308233 | 1331845 | 1333026 |         |         | 1300921 | 1302102 | 987565  | 988746  | 496667 | 497848 | 1058554 | 1057373 | 857744 | 858925 | 206185 | 207366 | 1225512 | 1226414 |
| 1066 BPSS1005 | 17                                          | 1305438 | 1306667 | 1330231 | 1331460 |         |         | 1299307 | 1300536 | 985951  | 987180  | 495053 | 496282 | 1060168 | 1058939 | 856130 | 857359 | 204571 | 205800 | 1223898 | 1225127 |
| 1067 BPSS1006 | 17                                          | 1304815 | 1300589 | 1329608 | 1325382 |         |         | 1298684 | 1294458 | 985328  | 981102  | 494430 | 490204 | 1060791 | 1065017 | 855507 | 853555 | 203948 | 199722 | 1223275 | 1219436 |
| 1068 BPSS1007 | 17                                          | 1278214 | 1277519 | 1314533 | 1311342 |         |         | 1275196 | 1272002 | 971661  | 962575  | 467772 | 467077 | 1087982 | 1091938 | 835815 | 832633 | 190272 | 181165 | 1209292 | 1200653 |
| 1069 BPSS1008 | 17                                          | 1273752 | 1270264 | 1297363 | 1293875 |         |         | 1267845 | 1264357 | 954275  | 952482  | 463286 | 459798 | 1091938 | 1095426 | 824445 | 822781 | 172951 | 169463 | 1192535 | 1189047 |
| 1070 BPSS1009 | 17                                          | 1259134 | 1254494 | 1280241 | 1275601 |         |         | 1253227 | 1248587 | 939631  | 934991  | 448614 | 443947 | 1106574 | 1111241 | 810182 | 805524 | 158315 | 153666 | 1178380 | 1173731 |
| 1071 BPSS1010 | 17                                          | 1254471 | 1252753 | 1275578 | 1273860 |         |         | 1248564 | 1246846 | 934968  | 933250  | 443924 | 442206 | 1111264 | 1112982 | 805501 | 803783 | 153643 | 151925 | 1173708 | 1171990 |
| 1072 BPSS1011 | 17                                          | 1252667 | 1251234 | 1273774 | 1272341 |         |         | 1246760 | 1245327 | 933164  | 931731  | 442120 | 440687 | 1113068 | 1114501 | 803697 | 802264 | 151839 | 150406 | 1171904 | 1170471 |
| 1073 BPSS1012 | 17                                          | 1248692 | 1250593 | 1269799 | 1271700 |         |         | 1242785 | 1244866 | 929189  | 931090  | 438145 | 440046 | 1117054 | 1115153 | 799711 | 801612 | 147864 | 149765 | 1167929 | 1169830 |
| 1074 BPSS1013 | 17                                          | 1248244 | 1248654 | 1269351 | 1269761 |         |         | 1242337 | 1242747 | 928741  | 929151  | 437697 | 438107 | 1117502 | 1117092 | 799263 | 799673 | 147416 | 147826 | 1167481 | 1167891 |
| 1075 BPSS1014 | 17                                          | 1246910 | 1248100 | 1268017 | 1269207 |         |         | 1241003 | 1242193 | 927407  | 928597  | 436363 | 437553 | 1118836 | 1117646 | 797929 | 799119 | 146082 | 147272 | 1166147 | 1167337 |
| 1076 BPSS1015 | 17                                          | 1246557 | 1245589 | 1267664 | 1266696 |         |         | 1240650 | 1239682 | 927054  | 926086  | 436010 | 435042 | 1119189 | 1120157 | 797576 | 796608 | 145729 | 144761 | 1165794 | 1164826 |
| 1077 BPSS1016 | 17                                          | 1243922 | 1245061 | 1265029 | 1266168 |         |         | 1238015 | 1239154 | 924419  | 925558  | 433375 | 434514 | 1121824 | 1120685 | 794941 | 796080 | 143094 | 144233 | 1163159 | 1164298 |
| 1078 BPSS1017 | 17                                          | 1243258 | 1242497 | 1264365 | 1263604 |         |         | 1237351 | 1236590 | 923755  | 922994  | 432711 | 431950 | 1122488 | 1123249 | 794277 | 793516 | 142430 | 141669 | 1162495 | 1161734 |
| 1079 BPSS1018 | 17                                          | 1241239 | 1242144 | 1262346 | 1263251 |         |         | 1235308 | 1236213 | 921736  | 922641  | 430692 | 431597 | 1124507 | 1123602 | 792258 | 793163 | 140411 | 141316 | 1160476 | 1161381 |
| 1080 BPSS1019 | 17                                          | 1240359 | 1241060 | 1261466 | 1262167 |         |         | 1234428 | 1235129 | 920856  | 921557  | 429812 | 430513 | 1125387 | 1124686 | 791378 | 792079 | 139531 | 140232 | 1159596 | 1160297 |
| 1081 BPSS1020 | 17                                          | 1239149 | 1240174 | 1260256 | 1261281 |         |         | 1233225 | 1234250 | 919646  | 920671  | 428602 | 429627 | 1126597 | 1125572 | 790168 | 791193 | 138321 | 139346 | 1158400 | 1159395 |
| 1082 BPSS1021 | 17                                          | 1238455 | 1238300 | 1259532 | 1259    |         |         |         |         |         |         |        |        |         |         |        |        |        |        |         |         |







|      |                  |    |         |         |         |         |         |         |         |         |        |        |        |        |         |         |        |        |         |         |         |         |
|------|------------------|----|---------|---------|---------|---------|---------|---------|---------|---------|--------|--------|--------|--------|---------|---------|--------|--------|---------|---------|---------|---------|
| 1237 | BPSS1174         |    |         |         |         |         |         |         |         |         |        |        |        |        |         |         |        |        |         |         |         |         |
| 1238 | BPSS1175         |    |         |         |         |         |         |         |         |         |        |        |        |        |         |         |        |        |         |         |         |         |
| 1239 | BPSS1176         |    |         |         |         |         |         |         |         |         |        |        |        |        |         |         |        |        |         |         |         |         |
| 1240 | BPSS1177         |    |         |         |         |         |         |         |         |         |        |        |        |        |         |         |        |        |         |         |         |         |
| 1241 | BPSS1178         |    |         |         |         |         |         |         |         |         |        |        |        |        |         |         |        |        |         |         |         |         |
| 1242 | BPSS1179         |    |         |         |         |         |         |         |         |         |        |        |        |        |         |         |        |        |         |         |         |         |
| 1243 | BPSS1180         |    |         |         |         |         |         |         |         |         |        |        |        |        |         |         |        |        |         |         |         |         |
| 1244 | BPSS1181         |    |         |         |         |         |         |         |         |         |        |        |        |        |         |         |        |        |         |         |         |         |
| 1245 | BPSS1182         |    |         |         |         |         |         |         |         |         |        |        |        |        |         |         |        |        |         |         |         |         |
| 1246 | BPSS1183         |    |         |         |         |         |         |         |         |         |        |        |        |        |         |         |        |        |         |         |         |         |
| 1247 | BPSS1184         |    |         |         |         |         |         |         |         |         |        |        |        |        |         |         |        |        |         |         |         |         |
| 1248 | BPSS1185         |    |         |         |         |         |         |         |         |         |        |        |        |        |         |         |        |        |         |         |         |         |
| 1249 | BPSS1185a        |    |         |         |         |         |         |         |         |         |        |        |        |        |         |         |        |        |         |         |         |         |
| 1250 | BPSS1187         |    |         |         |         |         |         |         |         |         |        |        |        |        |         |         |        |        |         |         |         |         |
| 1251 | BPSS1188         |    |         |         |         |         |         |         |         |         |        |        |        |        |         |         |        |        |         |         |         |         |
| 1252 | BPSS1190         |    |         |         |         |         |         |         |         |         |        |        |        |        |         |         |        |        |         |         |         |         |
| 1253 | BPSS1191         |    |         |         |         |         |         |         |         |         |        |        |        |        |         |         |        |        |         |         |         |         |
| 1254 | BPSS1192         |    |         |         |         |         |         |         |         |         |        |        |        |        |         |         |        |        |         |         |         |         |
| 1255 | BPSS1193         |    |         |         |         |         |         |         |         |         |        |        |        |        |         |         |        |        |         |         |         |         |
| 1256 | BPSS1194         |    |         |         |         |         |         |         |         |         |        |        |        |        |         |         |        |        |         |         |         |         |
| 1257 | BPSS1195         |    |         |         |         |         |         |         |         |         |        |        |        |        |         |         |        |        |         |         |         |         |
| 1258 | BPSS1196         |    |         |         |         |         |         |         |         |         |        |        |        |        |         |         |        |        |         |         |         |         |
| 1259 | BPSS1197         |    |         |         |         |         |         |         |         |         |        |        |        |        |         |         |        |        |         |         |         |         |
| 1260 | BPSS1198         |    |         |         |         |         |         |         |         |         |        |        |        |        |         |         |        |        |         |         |         |         |
| 1261 | BPSS1199         |    |         |         |         |         |         |         |         |         |        |        |        |        |         |         |        |        |         |         |         |         |
| 1262 | BPSS1200         |    |         |         |         |         |         |         |         |         |        |        |        |        |         |         |        |        |         |         |         |         |
| 1263 | BPSS1201         |    |         |         |         |         |         |         |         |         |        |        |        |        |         |         |        |        |         |         |         |         |
| 1264 | BPSS1202         |    |         |         |         |         |         |         |         |         |        |        |        |        |         |         |        |        |         |         |         |         |
| 1265 | BPSS1203         |    |         |         |         |         |         |         |         |         |        |        |        |        |         |         |        |        |         |         |         |         |
| 1266 | BPSS1204         |    |         |         |         |         |         |         |         |         |        |        |        |        |         |         |        |        |         |         |         |         |
| 1267 | BPSS1205         |    |         |         |         |         |         |         |         |         |        |        |        |        |         |         |        |        |         |         |         |         |
| 1268 | BPSS1206         |    |         |         |         |         |         |         |         |         |        |        |        |        |         |         |        |        |         |         |         |         |
| 1269 | BPSS1207         |    |         |         |         |         |         |         |         |         |        |        |        |        |         |         |        |        |         |         |         |         |
| 1270 | BPSS1208         |    |         |         |         |         |         |         |         |         |        |        |        |        |         |         |        |        |         |         |         |         |
| 1271 | BPSS1209         |    |         |         |         |         |         |         |         |         |        |        |        |        |         |         |        |        |         |         |         |         |
| 1272 | BPSS1210         |    |         |         |         |         |         |         |         |         |        |        |        |        |         |         |        |        |         |         |         |         |
| 1273 | BPSS1211         |    |         |         |         |         |         |         |         |         |        |        |        |        |         |         |        |        |         |         |         |         |
| 1274 | BPSS1212         |    |         |         |         |         |         |         |         |         |        |        |        |        |         |         |        |        |         |         |         |         |
| 1275 | BPSS1213         |    |         |         |         |         |         |         |         |         |        |        |        |        |         |         |        |        |         |         |         |         |
| 1276 | BPSS1214         |    |         |         |         |         |         |         |         |         |        |        |        |        |         |         |        |        |         |         |         |         |
| 1277 | BPSS1215         |    |         |         |         |         |         |         |         |         |        |        |        |        |         |         |        |        |         |         |         |         |
| 1278 | BPSS1216         |    |         |         |         |         |         |         |         |         |        |        |        |        |         |         |        |        |         |         |         |         |
| 1279 | BPSS1217         |    |         |         |         |         |         |         |         |         |        |        |        |        |         |         |        |        |         |         |         |         |
| 1280 | BPSS1218         |    |         |         |         |         |         |         |         |         |        |        |        |        |         |         |        |        |         |         |         |         |
| 1281 | Chr2_45_IS407A_B | 18 | 1096730 | 1097965 | 1115369 | 1116604 | 1178167 | 1179402 | 1091459 | 1092694 | 828859 | 830094 |        |        |         |         | 41016  | 42251  | 1057806 | 1059041 |         |         |
| 1282 | BPSS1219         | 18 | 1098143 | 1099960 | 1116782 | 1118599 | 1179580 | 1181397 | 1092872 | 1094689 | 830272 | 832089 | 374178 | 372361 | 1181021 | 1182838 | 735738 | 733921 | 42429   | 44246   | 1059219 | 1061036 |
| 1283 | BPSS1220         | 18 | 1100359 | 1101357 | 1118998 | 1119996 | 1181796 | 1182794 | 1095088 | 1096086 | 832481 | 833479 | 371955 | 370957 | 1183237 | 1184235 | 733536 | 732538 | 44638   | 45636   | 1061428 | 1062426 |
| 1284 | BPSS1221         | 18 | 1101419 | 1102189 | 1120058 | 1120828 | 1182856 | 1183626 | 1096148 | 1096918 | 833541 | 834311 | 370895 | 370125 | 1184297 | 1185067 | 732476 | 731706 | 45698   | 46468   | 1062488 | 1063258 |
| 1285 | BPSS1222         | 18 | 1103960 | 1102230 | 1122599 | 1120869 | 1185397 | 1183667 | 1098689 | 1096959 | 836082 | 834352 | 368354 | 370084 | 1186838 | 1185108 | 729935 | 731665 | 48239   | 46509   | 1065029 | 1063299 |
| 1286 | BPSS1223         | 18 | 1105197 | 1106096 | 1123836 | 1124735 | 1186634 | 1187533 | 1099926 | 1100825 | 837319 | 838218 | 367117 | 366218 | 1188075 | 1188974 | 728698 | 727799 | 49476   | 50375   | 1066266 | 1067165 |
| 1287 | BPSS1224         | 18 | 1106200 | 1108170 | 1124839 | 1126782 | 1187637 | 1189607 | 1100929 | 1102899 | 838322 | 840292 | 366114 | 364144 | 1189078 | 1191048 | 727695 | 725725 | 50479   | 52449   | 1067269 | 1069239 |



|      |                                        |     |         |         |         |         |         |         |         |         |         |         |        |        |         |         |        |        |         |         |         |         |
|------|----------------------------------------|-----|---------|---------|---------|---------|---------|---------|---------|---------|---------|---------|--------|--------|---------|---------|--------|--------|---------|---------|---------|---------|
| 1288 | BPSS1225                               | 18  | 1108187 | 1108540 | 1126827 | 1126955 | 1189624 | 1189977 | 1102916 | 1103269 | 840309  | 840662  | 364127 | 363774 | 1191065 | 1191418 | 725708 | 725355 | 52466   | 52819   | 1069256 | 1069609 |
| 1289 | BPSS1226                               | 18  | 1108780 | 1109055 | 1127573 | 1127848 | 1190217 | 1190492 | 1103509 | 1103784 | 840902  | 841177  | 363534 | 363259 | 1191650 | 1191925 | 725115 | 724840 | 53059   | 53334   | 1069849 | 1070124 |
| 1290 | BPSS1227                               | 18  | 1109689 | 1109219 | 1128482 | 1128012 | 1191126 | 1190656 | 1104418 | 1103948 | 841811  | 841341  | 362625 | 363095 | 1192559 | 1192089 | 724206 | 724676 | 53968   | 53498   | 1070758 | 1070288 |
| 1291 | BPSS1228                               | 18  | 1110867 | 1109848 | 1129660 | 1128641 | 1192304 | 1191285 | 1105596 | 1104577 | 842989  | 841970  | 361447 | 362466 | 1193737 | 1192718 | 723028 | 724047 | 55146   | 54127   | 1071936 | 1070917 |
| 1292 | BPSS1229                               | 18  | 1111380 | 1112159 | 1130173 | 1130952 | 1192817 | 1193596 | 1106109 | 1106888 | 843502  | 844281  | 360934 | 360155 | 1194250 | 1195029 | 722515 | 721736 | 55659   | 56438   | 1072449 | 1073228 |
| 1293 | BPSS1230                               | 18  | 1112175 | 1113329 | 1130968 | 1132122 | 1193612 | 1194766 | 1106904 | 1108058 | 844297  | 845451  | 360139 | 358985 | 1195045 | 1196199 | 721720 | 720566 | 56454   | 57608   | 1073244 | 1074398 |
| 1294 | BPSS1231                               | 18  | 1114211 | 1113744 | 1133004 | 1132537 | 1195648 | 1195181 | 1108940 | 1108473 | 846277  | 845810  | 358117 | 358584 | 1197060 | 1196593 | 719670 | 720137 | 58469   | 58002   | 1075238 | 1074771 |
| 1295 | BPSS1232                               | 18  | 1114988 | 1116271 | 1133781 | 1135064 | 1196425 | 1197708 | 1109717 | 1111000 | 847054  | 848337  | 357340 | 356063 | 1197837 | 1199114 | 718893 | 717616 | 59246   | 60523   | 1076015 | 1077292 |
| 1296 | BPSS1233                               | 18  | 1116470 | 1117345 | 1135263 | 1136138 | 1197907 | 1198782 | 1111199 | 1112074 | 848536  | 849411  | 355891 | 355016 | 1199286 | 1200161 | 717453 | 716578 | 60704   | 61579   | 1077482 | 1078357 |
| 1297 | BPSS1234                               | 18  | 1117336 | 1118145 | 1136129 | 1136938 | 1198773 | 1199582 | 1112065 | 1112874 | 849402  | 850211  | 355025 | 354216 | 1200152 | 1200961 | 716587 | 715778 | 61570   | 62379   | 1078348 | 1079157 |
| 1298 | BPSS1235                               | 18  | 1118170 | 1119201 | 1136963 | 1137994 | 1199607 | 1200638 | 1112899 | 1113930 | 850236  | 851267  | 354191 | 353160 | 1200986 | 1202017 | 715753 | 714722 | 62404   | 63435   | 1079182 | 1080213 |
| 1299 | BPSS1236                               | 18  | 1119232 | 1120398 | 1138025 | 1139191 | 1200669 | 1201835 | 1113961 | 1115127 | 851298  | 852464  | 353129 | 351963 | 1202048 | 1203214 | 714691 | 713525 | 63466   | 64632   | 1080244 | 1081410 |
| 1300 | BPSS1237                               | 18  | 1120398 | 1121393 | 1139191 | 1140186 | 1201835 | 1202830 | 1115127 | 1116122 | 852464  | 853459  | 351963 | 350968 | 1203214 | 1204209 | 713525 | 712530 | 64632   | 65627   | 1081410 | 1082405 |
| 1301 | BPSS1238                               | 18  | 1121393 | 1122817 | 1140186 | 1141610 | 1202830 | 1204254 | 1116122 | 1117546 | 853459  | 854883  | 350968 | 349544 | 1204209 | 1205633 | 712530 | 711106 | 65627   | 67051   | 1082405 | 1083829 |
| 1302 | BPSS1239                               | 18  | 1123437 | 1124435 | 1142230 | 1143228 | 1204874 | 1205872 | 1118166 | 1119164 | 855503  | 856501  | 348923 | 347925 | 1206254 | 1207252 | 710486 | 709488 | 67671   | 68654   | 1084449 | 1085432 |
| 1303 | BPSS1240                               | 18  | 1124760 | 1126514 | 1143553 | 1145307 | 1206197 | 1206391 | 1119489 | 1121243 | 856826  | 858580  | 347600 | 345846 | 1207577 | 1209331 | 709163 | 707409 | 68762   | 70516   | 1085540 | 1087234 |
| 1304 | BPSS1241                               | 18  | 1131331 | 1127093 | 1150124 | 1145886 | 1213317 | 1209079 | 1126060 | 1121822 | 863389  | 859151  | 341037 | 345275 | 1214140 | 1209902 | 702592 | 706548 | 75325   | 71087   | 1091239 | 1087679 |
| 1305 | Chr2_46_IS407A_C                       | 18  |         |         |         |         |         |         |         |         |         |         |        |        |         |         |        |        |         |         | 1091241 | 1092476 |
| 1306 | BPSS1242                               | 18  | 1131740 | 1131393 | 1150533 | 1150186 | 1213726 | 1213379 | 1126469 | 1126122 | 863798  | 863451  | 340628 | 340975 | 1214549 | 1214202 | 702183 | 702530 | 75734   | 75387   | 1093566 | 1093219 |
| 1307 | BPSS1243                               | 18  | 1134360 | 1131781 | 1153153 | 1150574 | 1216346 | 1213767 | 1129089 | 1126510 | 866418  | 863839  | 338008 | 340587 | 1217169 | 1214590 | 699563 | 702142 | 78354   | 75775   | 1096186 | 1093607 |
| 1308 | BPSS1244                               | 18  | 1135702 | 1134380 | 1154495 | 1153173 | 1217688 | 1216366 | 1130431 | 1129109 | 867760  | 866438  | 336666 | 337988 | 1218511 | 1217189 | 698221 | 699543 | 79696   | 78374   | 1097528 | 1096206 |
| 1309 | BPSS1245                               | 18  | 1136577 | 1137518 | 1155541 | 1156482 | 1219085 | 1220026 | 1131058 | 1131999 | 868643  | 869584  | 335791 | 334850 | 1219386 | 1220327 | 697346 | 696405 | 80579   | 81520   | 1098109 | 1098861 |
| 1310 | BPSS1246                               | 18  | 1137623 | 1138216 | 1156587 | 1157180 | 1220131 | 1220724 | 1132104 | 1132697 | 869689  | 870282  | 334745 | 334152 | 1220432 | 1221025 | 696300 | 695707 | 81625   | 82218   | 1098966 | 1099559 |
| 1311 | BPSS1247                               | 18  | 1138216 | 1139295 | 1157180 | 1158259 | 1220724 | 1221803 | 1132697 | 1133776 | 870282  | 871361  | 334152 | 333073 | 1221025 | 1222104 | 695707 | 694628 | 82218   | 83297   | 1099559 | 1100638 |
| 1312 | BPSS1248                               | 18  | 1140200 | 1139571 | 1159164 | 1158535 | 1222708 | 1222079 | 1134681 | 1134052 | 872266  | 871637  | 332168 | 332797 | 1223009 | 1222380 | 693723 | 694352 | 84202   | 83573   | 1101543 | 1100914 |
| 1313 | BPSS1249                               | 18  | 1141765 | 1143954 | 1160729 | 1162918 | 1224273 | 1226462 | 1136246 | 1138435 | 873831  | 876020  | 330603 | 328414 | 1224574 | 1226763 | 692174 | 689985 | 85767   | 87956   | 1103108 | 1105297 |
| 1314 | BPSS1250                               | 18  | 1145523 | 1144504 | 1164487 | 1163468 | 1228031 | 1227012 | 1140004 | 1138985 | 877589  | 876570  | 326845 | 327864 | 1228332 | 1227313 | 688416 | 689435 | 89525   | 88506   | 1106866 | 1105847 |
| 1315 | BPSS1251                               | 18  | 1146933 | 1145557 | 1165897 | 1164521 | 1229441 | 1228065 | 1141414 | 1140038 | 878999  | 877623  | 325435 | 326811 | 1229742 | 1228366 | 687006 | 688382 | 90935   | 89559   | 1108276 | 1106900 |
| 1316 | BPSS1252                               | 18  | 1148292 | 1146961 | 1167256 | 1165925 | 1230800 | 1229469 | 1142773 | 1141442 | 880358  | 879027  | 324076 | 325407 | 1231101 | 1229770 | 685647 | 686978 | 92294   | 90963   | 1109635 | 1108304 |
| 1317 | BPSS1253                               | 18  | 1148481 | 1148561 | 1167445 | 1167525 | 1230989 | 1231069 | 1142962 | 1143042 | 880547  | 880627  | 323887 | 323807 | 1231290 | 1231370 | 685458 | 685378 | 92483   | 92563   | 1109824 | 1109904 |
| 1318 | BPSS1254                               | 18  | 1149978 | 1149559 | 1168942 | 1168523 | 1232486 | 1232067 | 1144459 | 1144040 | 882044  | 881625  | 322390 | 322809 | 1232787 | 1232368 | 683961 | 684380 | 93980   | 93561   | 1111321 | 1110902 |
| 1319 | BPSS1255                               | 18  | 1150140 | 1150027 | 1169994 | 1169101 | 1233538 | 1232645 | 1145511 | 1144618 | 883096  | 882203  | 321338 | 322231 | 1233839 | 1232946 | 682909 | 683802 | 95032   | 94139   | 1112373 | 1111480 |
| 1320 | BPSS1256                               | 18  | 1151154 | 1151894 | 1170118 | 1170858 | 1233662 | 1234402 | 1145635 | 1146375 | 883220  | 883960  | 321214 | 320474 | 1233963 | 1234703 | 682785 | 682045 | 95156   | 95896   | 1112497 | 1113237 |
| 1321 | BPSS1257                               | 18  | 1153625 | 1152210 | 1172589 | 1171174 | 1236133 | 1234718 | 1148106 | 1146691 | 885691  | 884276  | 318743 | 320158 | 1236434 | 1235019 | 680314 | 681729 | 97627   | 96212   | 1114968 | 1113553 |
| 1322 | BPSS1258                               | 18  | 1155694 | 1154660 | 1175122 | 1174088 | 1238926 | 1237892 | 1150174 | 1149140 | 887687  | 886653  | 316667 | 317701 | 1238629 | 1237595 | 678088 | 679122 | 99668   | 98634   | 1117402 | 1116368 |
| 1323 | BPSS1259                               | 18  | 1156916 | 1155762 | 1176344 | 1175190 | 1240148 | 1238994 | 1151396 | 1150242 | 888909  | 887755  | 315445 | 316599 | 1239851 | 1238697 | 676866 | 678020 | 100890  | 99736   | 1118624 | 1117470 |
| 1324 | BPSS1260                               | 18  | 1158741 | 1160552 | 1178169 | 1179980 | 1241973 | 1243784 | 1153221 | 1155032 | 890734  | 892545  | 313620 | 311809 | 1241676 | 1243487 | 675041 | 673230 | 102715  | 104526  | 1120449 | 1122260 |
| 1325 | BPSS1261                               | 18  | 1161129 | 1160800 | 1180557 | 1180228 | 1244361 | 1244032 | 1155609 | 1155280 | 893122  | 892793  | 311232 | 311561 | 1244064 | 1243735 | 672653 | 672982 | 105103  | 104774  | 1122837 | 1122508 |
| 1326 | BPSS1262                               | 18  | 1161393 | 1162172 | 1180821 | 1181600 | 1244625 | 1245404 | 1155873 | 1156652 | 893386  | 894165  | 310968 | 310189 | 1244328 | 1245107 | 672389 | 671610 | 105367  | 106146  | 1123101 | 1123880 |
| 1327 | BPSS1263                               | 18  | 1162186 | 1164999 | 1181614 | 1184427 | 1245418 | 1248228 | 1156666 | 1159479 |         |         |        |        |         |         | 106160 | 108973 | 1123894 | 1126707 |         |         |
| 1328 | BPSS1264                               | 18  | 1164999 | 1165643 | 1184427 | 1185071 |         |         | 1159479 | 1160123 | 897232  | 897876  | 307122 | 306478 | 1248174 | 1248818 | 668543 | 667899 | 108973  | 109617  | 1126707 | 1127351 |
| 1329 | BPSS1265_conserved hypothetical protei | 18  |         |         |         |         |         |         |         |         |         |         |        |        |         |         |        |        |         |         |         |         |
| 1330 | BPSS1266                               | 18  | 1169952 | 1166707 | 1189381 | 1187321 | 1253833 | 1250588 | 1164432 | 1161187 | 902185  | 898940  | 302169 | 305414 | 1253127 | 1249882 | 663590 | 666835 | 113926  | 110681  | 1131724 | 1129664 |
| 1331 | BPSS1267                               | 18  | 1170205 | 1170002 | 1189634 | 1189431 | 1254086 | 1253883 | 1164685 | 1164482 | 902438  | 902235  | 301916 | 302119 | 1253380 | 1253177 | 663337 | 663540 | 114179  | 113976  | 1131977 | 1131774 |
| 1332 | BPSS1268                               | 18  | 1171513 | 1170227 | 1190942 | 1189656 | 1255394 | 1254108 | 1165993 | 1164707 | 903746  | 902460  | 300608 | 301894 | 1254688 | 1253402 | 662029 | 663315 | 115487  | 114201  | 1133285 | 1131999 |
| 1333 | BPSS1269_partial                       | 18  | 1172237 | 1171521 | 1191666 | 1190950 | 1256118 | 1255402 | 1166717 | 1166001 | 904470  | 903754  | 299884 | 300600 | 1255430 | 1254696 | 661305 | 662021 | 116211  | 115495  | 1134009 | 1133293 |
| 1334 | Chr2_47_ISBma2_A                       |     | 1172191 | 1173763 | 1191620 | 1193192 | 1256072 | 1257644 | 1166671 | 1168243 | 904424  | 905996  | 298358 | 299930 | 1255366 | 1256940 | 659779 | 661351 | 116165  | 117737  | 1133963 | 1135535 |
| 1335 | Chr2_48_IS407A_A                       |     | 1061754 | 1062989 | 1080393 | 1081628 | 1143190 | 1144425 | 1056512 | 1057747 | 1438414 | 1439649 | 297003 | 298238 | 1257060 | 1258295 | 658424 | 659659 |         |         | 1135654 | 1136889 |
| 1336 | BPSS1270                               | 19a | 1048735 | 1049730 | 1067374 | 1068369 | 1130171 | 1131166 |         |         |         |         |        |        |         |         |        |        |         |         |         |         |



|                |                  |        |        |        |        |         |         |        |        |         |         |        |        |         |         |        |        |        |        |        |        |
|----------------|------------------|--------|--------|--------|--------|---------|---------|--------|--------|---------|---------|--------|--------|---------|---------|--------|--------|--------|--------|--------|--------|
| 1390 BPSS1320  | 19b              | 975395 | 976249 | 992159 | 993013 | 1052194 | 1053048 | 970412 | 971266 | 1351164 | 1352018 | 208059 | 208913 | 1347199 | 1346345 | 569479 | 570333 | 433471 | 432617 | 960472 | 961326 |
| 1391 BPSS1321  | 19b              | 974289 | 975368 | 991053 | 992132 | 1051088 | 1052167 | 969306 | 970385 | 1350059 | 1351156 | 206954 | 208051 | 1348304 | 1347207 | 568374 | 569471 | 434576 | 433479 | 959367 | 960464 |
| 1392 BPSS1322  | 19b              | 973553 | 972684 | 990317 | 989448 | 1050352 | 1049483 | 968570 | 967701 | 1349323 | 1348454 | 206218 | 205349 | 1349040 | 1349909 | 567638 | 566769 | 435312 | 436181 | 958631 | 957762 |
| 1393 BPSS1323  | 19b              | 971528 | 972484 | 988292 | 989248 | 1048327 | 1049283 | 966545 | 967501 | 1347298 | 1348254 | 204193 | 205149 | 1351065 | 1350109 | 565613 | 566569 | 437337 | 436381 | 956606 | 957562 |
| 1394 BPSS1324  | 19b              | 970271 | 971284 | 987035 | 988048 | 1047070 | 1048083 | 965288 | 966301 | 1346041 | 1347054 | 202936 | 203949 | 1352322 | 1351309 | 564356 | 565369 | 438594 | 437581 | 955349 | 956362 |
| 1395 BPSS1325  | 19b              | 970078 | 969572 | 986842 | 986336 | 1046877 | 1046371 | 965095 | 964589 | 1345848 | 1345342 | 202743 | 202237 | 1352515 | 1353021 | 564163 | 563657 | 438787 | 439293 | 955156 | 954650 |
| 1396 BPSS1326  | 19b              | 969139 | 967682 | 985903 | 984446 | 1045938 | 1044481 | 964156 | 962699 | 1344909 | 1343452 | 201804 | 200347 | 1353454 | 1354911 | 563224 | 561767 | 439726 | 441183 | 954217 | 952760 |
| 1397 BPSS1327  | 19b              | 726717 | 726746 | 982888 | 984228 | 1042923 | 1044263 | 961141 | 962481 | 1341894 | 1343234 | 198789 | 200129 | 1356469 | 1355129 | 560209 | 561549 | 442741 | 441401 | 951202 | 952542 |
| 1398 BPSS1328  | 19b              | 966016 | 965294 | 982780 | 982058 | 1042815 | 1042093 | 961033 | 960311 | 1341786 | 1341064 | 198681 | 197959 | 1356577 | 1357299 | 560101 | 559379 | 442849 | 443571 | 951094 | 950372 |
| 1399 BPSS1329  | 19b              | 965231 | 963810 | 981995 | 980574 | 1042030 | 1040609 | 960248 | 958827 | 1341001 | 1339580 | 197896 | 196475 | 1357362 | 1358783 | 559316 | 557895 | 443634 | 445055 | 950309 | 948888 |
| 1400 BPSS1330  | 19b              | 963755 | 962868 | 980519 | 979632 | 1040554 | 1039667 | 958772 | 957885 | 1339525 | 1338638 | 196420 | 195533 | 1358838 | 1359725 | 557840 | 556953 | 445110 | 445997 | 948833 | 947946 |
| 1401 BPSS1331  | 19b              | 962519 | 960975 | 979283 | 977739 | 1039318 | 1037774 | 957536 | 955992 | 1338289 | 1336745 | 195184 | 193640 | 1360074 | 1361618 | 556604 | 555060 | 446346 | 447890 | 947597 | 946053 |
| 1402 BPSS1332  | 19b              | 960975 | 959356 | 977739 | 976120 | 1037774 | 1037664 | 955992 | 954373 | 1336745 | 1335126 | 193640 | 192021 | 1361618 | 1363237 | 555060 | 553441 | 447890 | 449509 | 946053 | 944434 |
| 1403 BPSS1333  | 19b              | 959174 | 958317 | 975938 | 975081 | 1035972 | 1035115 | 954191 | 953334 | 1334944 | 1334087 | 191839 | 190982 | 1363419 | 1364276 | 553259 | 552402 | 449691 | 450548 | 944252 | 943395 |
| 1404 BPSS1334  | 19b              | 957637 | 957356 | 974401 | 974120 | 1034435 | 1034154 | 952654 | 952373 | 1333609 | 1333126 | 190302 | 190021 | 1364956 | 1365237 | 551722 | 551441 | 451228 | 451509 | 942715 | 942434 |
| 1405 BPSS1335  | 19b              | 956998 | 956789 | 973762 | 973553 | 1033796 | 1033587 | 952015 | 951806 | 1332768 | 1332559 | 189663 | 189454 | 1365595 | 1365804 | 551083 | 550874 | 451867 | 452076 | 942076 | 941867 |
| 1406 BPSS1336  | 19b              | 955892 | 956452 | 972656 | 973216 | 1032690 | 1033250 | 950909 | 951469 | 1331662 | 1332222 | 188557 | 189117 | 1366701 | 1366141 | 549977 | 550537 | 452973 | 452413 | 940970 | 941530 |
| 1407 BPSS1337  | 19b              | 955438 | 955848 | 972202 | 972612 | 1032236 | 1032646 | 950455 | 950865 | 1331208 | 1331618 | 188103 | 188513 | 1367155 | 1366745 | 549523 | 549933 | 453427 | 453017 | 940516 | 940926 |
| 1408 BPSS1338  | 19b              | 954993 | 955424 | 971757 | 972188 | 1031791 | 1032222 | 950010 | 950441 | 1330763 | 1331194 | 187658 | 188089 | 1367600 | 1367169 | 549078 | 549509 | 453872 | 453441 | 940071 | 940502 |
| 1409 BPSS1339  | 19b              | 954683 | 955000 | 971447 | 971764 | 1031481 | 1031798 | 949700 | 950017 | 1330453 | 1330770 | 187348 | 187665 | 1367910 | 1367593 | 548768 | 549085 | 454182 | 453865 | 939761 | 940078 |
| 1410 BPSS1340  | 19b              | 954142 | 953612 | 970906 | 970376 | 1030940 | 1030410 | 949159 | 948629 | 1329912 | 1329382 | 186807 | 186277 | 1368451 | 1368981 | 548227 | 547697 | 454723 | 455253 | 939220 | 938690 |
| 1411 BPSS1341  | 19b              | 951344 | 953323 | 968108 | 970087 | 1028142 | 1030121 | 946361 | 948340 | 1327114 | 1329093 | 184009 | 185988 | 1371249 | 1369270 | 545429 | 547408 | 457521 | 455542 | 936422 | 938401 |
| 1412 BPSS1342  | 19b              | 950320 | 951333 | 967084 | 968097 | 1027118 | 1028131 | 945337 | 946350 | 1326090 | 1327103 | 182985 | 183998 | 1372273 | 1371260 | 544405 | 545418 | 458545 | 457532 | 935398 | 936411 |
| 1413 BPSS1343  | 19b              | 949999 | 950280 | 966763 | 967044 | 1026797 | 1027078 | 945016 | 945297 | 1325769 | 1326050 | 182664 | 182945 | 1372594 | 1372313 | 544084 | 544365 | 458866 | 458585 | 935077 | 935358 |
| 1414 BPSS1344  | 19b              | 949013 | 949999 | 965777 | 966763 | 1025811 | 1026797 | 944030 | 945016 | 1324783 | 1325769 | 181678 | 182664 | 1373580 | 1372594 | 543098 | 544084 | 459852 | 458866 | 934091 | 935077 |
| 1415 BPSS1345  | 19b              | 948431 | 948895 | 965195 | 965659 | 1025229 | 1025693 | 943448 | 943912 | 1324201 | 1324665 | 181096 | 181560 | 1374162 | 1373698 | 542516 | 542980 | 460434 | 459970 | 933509 | 933973 |
| 1416 BPSS1346  | 19b              | 948082 | 945968 | 964846 | 962732 | 1024880 | 1022766 | 943099 | 940985 | 1323852 | 1321738 | 180747 | 178633 | 1374511 | 1376625 | 542167 | 540053 | 460783 | 462897 | 933160 | 931046 |
| 1417 BPSS1347  | 19b              | 944052 | 945302 | 960816 | 962066 | 1020850 | 1022100 | 939069 | 940319 | 1457289 | 1456039 | 176757 | 178007 | 1378541 | 1377291 | 538431 | 539403 | 464781 | 463531 | 929098 | 930348 |
| 1418 BPSS1348  | 19b              | 941976 | 943568 | 477769 | 479361 | 1018774 | 1020366 | 936993 | 938585 | 1459350 | 1457773 | 174693 | 176273 | 1380617 | 1379025 | 536355 | 537947 | 466857 | 465265 | 927022 | 928614 |
| 1419 BPSS1349  | 19b              | 940676 | 941668 | 955734 | 956726 | 1017474 | 1018466 | 935693 | 936685 | 1460679 | 1459687 | 173393 | 174385 | 1381917 | 1380925 | 535055 | 536047 | 468157 | 467165 | 925722 | 926714 |
| 1420 BPSS1350  | 19b              | 938825 | 940408 | 474681 | 476201 | 1015623 | 1017206 | 933961 | 934008 | 1462542 | 1460959 | 171500 | 173083 | 1383792 | 1382209 | 533192 | 534775 | 470008 | 468425 | 923877 | 925460 |
| 1421 BPSS1351  | 19b              | 937434 | 938825 | 951595 | 952986 | 1014232 | 1015623 | 932570 | 933961 | 1463933 | 1462542 | 170109 | 171500 | 1385183 | 1383792 | 531801 | 533192 | 471399 | 470008 | 922486 | 923877 |
| 1422 BPSS1352  | 19b              | 936388 | 937284 | 950549 | 951445 | 1013186 | 1014082 | 931524 | 932420 | 1464979 | 1464083 | 169063 | 169959 | 1386229 | 1385333 | 530755 | 531651 | 472445 | 471549 | 921440 | 922336 |
| 1423           | Chr2_52_IS407A_A | 935032 | 936267 | 949193 | 950428 | 1011830 | 1013065 | 930168 | 931403 | 1465100 | 1466335 | 167708 | 168943 | 1386349 | 1387584 | 529400 | 530635 | 472566 | 473801 | 920084 | 921319 |
| 1424 BPSS1353  | 19b              | 934742 | 934158 | 948903 | 948319 | 1011540 | 1010956 | 929878 | 929294 | 1466625 | 1467209 | 167418 | 166834 | 1387874 | 1388458 | 529110 | 528526 | 474091 | 474675 | 919794 | 919210 |
| 1425 BPSS1354  | 19b              | 934112 | 932646 | 948273 | 946807 | 1010910 | 1009444 | 929248 | 927782 | 1467255 | 1468721 | 166788 | 165322 | 1388504 | 1389970 | 528479 | 527013 | 474721 | 476187 | 919164 | 917698 |
| 1426 BPSS1355  | 19b              | 932623 | 930929 | 946784 | 945090 | 1009421 | 1007727 | 927759 | 926065 | 1468744 | 1470438 | 165299 | 163605 | 1389993 | 1391687 | 526990 | 525296 | 476210 | 477904 | 917675 | 915981 |
| 1427 BPSS1356  | 19b              | 929846 | 926472 | 944007 | 940633 | 1006644 | 1003270 | 924982 | 921608 | 1471521 | 1474895 | 162522 | 159148 | 1392770 | 1396144 | 524213 | 520839 | 478987 | 482361 | 914898 | 911524 |
| 1428 BPSS1357  | 19b              | 926244 | 924811 | 940405 | 938972 | 1002481 | 1001048 | 921380 | 919947 | 1475123 | 1476556 | 158920 | 157487 | 1396372 | 1397805 | 520611 | 519178 | 482589 | 484022 | 911296 | 909863 |
| 1429 BPSS1358  | 19b              | 923249 | 924724 | 937410 | 938885 | 999486  | 1000961 | 918385 | 919860 | 1478118 | 1476643 | 155925 | 157400 | 1399367 | 1397892 | 517616 | 519091 | 485584 | 484109 | 908301 | 909776 |
| 1430 BPSS1359  | 19b              | 922800 | 923249 | 936961 | 937410 | 999037  | 999486  | 917936 | 918385 | 1478567 | 1478118 | 155476 | 155925 | 1399816 | 1399367 | 517167 | 517616 | 486033 | 485584 | 907852 | 908301 |
| 1431 BPSS1360  | 19b              | 920583 | 922793 | 934744 | 936954 | 996820  | 999030  | 915719 | 917929 | 1480784 | 1478574 | 153259 | 155469 | 1402033 | 1399823 | 514950 | 517160 | 488250 | 486040 | 905635 | 907845 |
| 1432 BPSS1361  | 19b              | 919552 | 920034 | 933713 | 934195 | 995789  | 996271  | 914688 | 915170 | 1481815 | 1481333 | 152228 | 152710 | 1403064 | 1402582 | 513919 | 514401 | 489281 | 488799 | 904604 | 905086 |
| 1433 BPSS1362  | 19b              | 918530 | 919510 | 932691 | 933671 | 994767  | 995747  | 913666 | 914646 | 1482837 | 1481857 | 151206 | 152186 | 1404086 | 1403106 | 512897 | 513877 | 490303 | 489323 | 903582 | 904562 |
| 1434 BPSS1363  | 19b              | 917821 | 917393 | 931982 | 931554 | 994058  | 993630  | 912957 | 912529 | 1483546 | 1483974 | 150497 | 150069 | 1404795 | 1405223 | 512188 | 511760 | 491012 | 491440 | 902873 | 902445 |
| 1435 BPSS1364  | 19b              | 916409 | 916609 | 930570 | 930770 | 992646  | 992846  | 911545 | 911745 | 1484958 | 1484758 | 149085 | 149285 | 1406207 | 1406007 | 510776 | 510976 | 492424 | 492224 | 901461 | 901661 |
| 1436 BPSS1364a | 19b              | 915756 | 915547 | 929917 | 929708 | 991993  | 991784  | 910892 | 910683 | 1485611 | 1485820 | 148432 | 148223 | 1406860 | 1407069 | 510123 | 509914 | 493077 | 493286 | 900808 | 900599 |
| 1437 BPSS1365  | 19b              | 914445 | 914903 | 928606 | 929064 | 990682  | 991140  | 909581 | 910039 | 1486922 | 1486464 | 147121 | 147579 | 1408171 | 1407713 | 508812 | 509270 | 494388 | 493930 | 899497 | 899955 |
| 1438 BPSS1366  | 19b              | 914239 | 914442 | 927975 | 928409 | 990051  | 990485  | 908950 | 909384 | 1487553 | 1487119 | 146490 | 146924 | 140880  |         |        |        |        |        |        |        |

|      |                  |        |        |        |        |        |        |        |        |         |         |        |        |         |         |         |        |        |        |        |        |  |
|------|------------------|--------|--------|--------|--------|--------|--------|--------|--------|---------|---------|--------|--------|---------|---------|---------|--------|--------|--------|--------|--------|--|
| 1441 | Chr2_53_IS407A_A | 909856 | 911091 | 924017 | 925252 | 986093 | 987328 | 904992 | 906227 | 1489755 | 1490990 | 142183 | 143418 | 1411874 | 1413109 | 503874  | 505109 | 497742 | 498977 | 894908 | 896143 |  |
| 1442 | BPSS1369         |        |        |        |        |        |        |        |        |         |         |        |        |         |         |         |        |        |        |        |        |  |
| 1443 | BPSS1370         |        |        |        |        |        |        |        |        |         |         |        |        |         |         |         |        |        |        |        |        |  |
| 1444 | BPSS1371         |        |        |        |        |        |        |        |        |         |         |        |        |         |         |         |        |        |        |        |        |  |
| 1445 | BPSS1372         |        |        |        |        |        |        |        |        |         |         |        |        |         |         |         |        |        |        |        |        |  |
| 1446 | BPSS1373         |        |        |        |        |        |        |        |        |         |         |        |        |         |         |         |        |        |        |        |        |  |
| 1447 | BPSS1374         |        |        |        |        |        |        |        |        |         |         |        |        |         |         |         |        |        |        |        |        |  |
| 1448 | BPSS1375         |        |        |        |        |        |        |        |        |         |         |        |        |         |         |         |        |        |        |        |        |  |
| 1449 | BPSS1376         |        |        |        |        |        |        |        |        |         |         |        |        |         |         |         |        |        |        |        |        |  |
| 1450 | BPSS1377         |        |        |        |        |        |        |        |        |         |         |        |        |         |         |         |        |        |        |        |        |  |
| 1451 | BPSS1378         |        |        |        |        |        |        |        |        |         |         |        |        |         |         |         |        |        |        |        |        |  |
| 1452 | BPSS1379         |        |        |        |        |        |        |        |        |         |         |        |        |         |         |         |        |        |        |        |        |  |
| 1453 | BPSS1380         |        |        |        |        |        |        |        |        |         |         |        |        |         |         |         |        |        |        |        |        |  |
| 1454 | BPSS1381         |        |        |        |        |        |        |        |        |         |         |        |        |         |         |         |        |        |        |        |        |  |
| 1455 | BPSS1382         |        |        |        |        |        |        |        |        |         |         |        |        |         |         |         |        |        |        |        |        |  |
| 1456 | BPSS1383         |        |        |        |        |        |        |        |        |         |         |        |        |         |         |         |        |        |        |        |        |  |
| 1457 | BPSS1383a        |        |        |        |        |        |        |        |        |         |         |        |        |         |         |         |        |        |        |        |        |  |
| 1458 | BPSS1384         |        |        |        |        |        |        |        |        |         |         |        |        |         |         |         |        |        |        |        |        |  |
| 1459 | BPSS1384a        |        |        |        |        |        |        |        |        |         |         |        |        |         |         |         |        |        |        |        |        |  |
| 1460 | BPSS1385         |        |        |        |        |        |        |        |        |         |         |        |        |         |         |         |        |        |        |        |        |  |
| 1461 | BPSS1386         |        |        |        |        |        |        |        |        |         |         |        |        |         |         |         |        |        |        |        |        |  |
| 1462 | BPSS1387         |        |        |        |        |        |        |        |        |         |         |        |        |         |         |         |        |        |        |        |        |  |
| 1463 | BPSS1388         |        |        |        |        |        |        |        |        |         |         |        |        |         |         |         |        |        |        |        |        |  |
| 1464 | BPSS1389         |        |        |        |        |        |        |        |        |         |         |        |        |         |         |         |        |        |        |        |        |  |
| 1465 | BPSS1390         |        |        |        |        |        |        |        |        |         |         |        |        |         |         |         |        |        |        |        |        |  |
| 1466 | BPSS1391         |        |        |        |        |        |        |        |        |         |         |        |        |         |         |         |        |        |        |        |        |  |
| 1467 | BPSS1392         |        |        |        |        |        |        |        |        |         |         |        |        |         |         |         |        |        |        |        |        |  |
| 1468 | BPSS1393         |        |        |        |        |        |        |        |        |         |         |        |        |         |         |         |        |        |        |        |        |  |
| 1469 | BPSS1394         |        |        |        |        |        |        |        |        |         |         |        |        |         |         |         |        |        |        |        |        |  |
| 1470 | BPSS1395         |        |        |        |        |        |        |        |        |         |         |        |        |         |         |         |        |        |        |        |        |  |
| 1471 | BPSS1396         |        |        |        |        |        |        |        |        |         |         |        |        |         |         |         |        |        |        |        |        |  |
| 1472 | BPSS1397         |        |        |        |        |        |        |        |        |         |         |        |        |         |         |         |        |        |        |        |        |  |
| 1473 | BPSS1398         |        |        |        |        |        |        |        |        |         |         |        |        |         |         |         |        |        |        |        |        |  |
| 1474 | BPSS1399         |        |        |        |        |        |        |        |        |         |         |        |        |         |         |         |        |        |        |        |        |  |
| 1475 | BPSS1400         |        |        |        |        |        |        |        |        |         |         |        |        |         |         |         |        |        |        |        |        |  |
| 1476 | BPSS1401         |        |        |        |        |        |        |        |        |         |         |        |        |         |         |         |        |        |        |        |        |  |
| 1477 | BPSS1402         |        |        |        |        |        |        |        |        |         |         |        |        |         |         |         |        |        |        |        |        |  |
| 1478 | BPSS1403         |        |        |        |        |        |        |        |        |         |         |        |        |         |         |         |        |        |        |        |        |  |
| 1479 | BPSS1404         |        |        |        |        |        |        |        |        |         |         |        |        |         |         |         |        |        |        |        |        |  |
| 1480 | BPSS1405         |        |        |        |        |        |        |        |        |         |         |        |        |         |         |         |        |        |        |        |        |  |
| 1481 | BPSS1406         |        |        |        |        |        |        |        |        |         |         |        |        |         |         |         |        |        |        |        |        |  |
| 1482 | BPSS1407         |        |        |        |        |        |        |        |        |         |         |        |        |         |         |         |        |        |        |        |        |  |
| 1483 | BPSS1408         |        |        |        |        |        |        |        |        |         |         |        |        |         |         |         |        |        |        |        |        |  |
| 1484 | BPSS1409         |        |        |        |        |        |        |        |        |         |         |        |        |         |         |         |        |        |        |        |        |  |
| 1485 | BPSS1410         |        |        |        |        |        |        |        |        |         |         |        |        |         |         |         |        |        |        |        |        |  |
| 1486 | Chr2_54_IS407A_A | 592085 | 593320 | 603189 | 604424 | 631977 | 633212 | 590631 | 591866 | 547403  | 548638  | 924390 | 925625 | 1782102 | 1783337 | 134525  | 135760 |        |        |        |        |  |
| 1487 | BPSS1411         | 20     | 591873 | 590761 | 602977 | 601865 | 631765 | 630653 | 590419 | 589307  | 547191  | 546079 | 925837 | 926949  | 1783549 | 1784661 | 134313 | 133201 |        |        |        |  |
| 1488 | BPSS1412         | 20     | 589849 | 590328 | 600953 | 601432 | 629741 | 630220 | 588395 | 588874  | 545167  | 545646 | 927861 | 927382  | 1785573 | 1785094 | 132289 | 132768 |        |        |        |  |
| 1489 | BPSS1413         | 20     | 589101 | 589751 | 600205 | 600855 | 628993 | 629643 | 587647 | 588297  | 544419  | 545069 | 928609 | 927959  | 1786321 | 1785671 | 131541 | 132191 |        |        |        |  |
| 1490 | BPSS1414         | 20     | 588949 | 588248 | 600053 | 599352 | 628841 | 628140 | 587495 | 586794  | 544267  | 543566 | 928761 | 929462  | 1786473 | 1787174 | 131389 | 130688 |        |        |        |  |
| 1491 | BPSS1415         | 20     | 588166 | 587279 | 599270 | 598383 | 628058 | 627171 | 586712 | 585825  | 543484  | 542597 | 929544 | 930431  | 1787256 | 1788143 | 130606 | 129719 |        |        |        |  |





|                                    |    |                   |         |         |         |         |         |         |         |         |         |         |         |         |         |         |         |         |        |         |         |         |
|------------------------------------|----|-------------------|---------|---------|---------|---------|---------|---------|---------|---------|---------|---------|---------|---------|---------|---------|---------|---------|--------|---------|---------|---------|
| 1543 BPSS1470                      | 21 | 796530            | 795232  | 810073  | 808775  | 838023  | 836725  | 794892  | 793594  | 751859  | 750561  | 718955  | 720253  | 1576597 | 1577895 | 340924  | 339626  | 578188  | 579486 | 684899  | 683601  |         |
| 1544 BPSS1471                      | 21 | 795176            | 794481  | 808719  | 808024  | 836669  | 835974  | 793538  | 792843  | 750505  | 749810  | 720309  | 721004  | 1577951 | 1578646 | 339570  | 338875  | 579542  | 580237 | 683545  | 682850  |         |
| 1545 BPSS1472_transposase          | 21 |                   |         |         |         |         |         |         |         |         |         |         |         |         |         |         |         |         |        |         |         |         |
| 1546 BPSS1473                      | 21 | 792218            | 794008  | 805761  | 807551  | 833711  | 835501  | 790580  | 792370  | 747547  | 749337  | 723266  | 721476  | 1580908 | 1579118 | 336613  | 338403  | 582500  | 580710 | 680587  | 682377  |         |
| 1547 BPSS1474                      | 21 | 790733            | 791488  | 804276  | 805031  | 832226  | 832981  | 789095  | 789850  | 746062  | 746817  | 724751  | 723996  | 1582393 | 1581638 | 335128  | 335883  | 583985  | 583230 | 679102  | 679857  |         |
| 1548 BPSS1475                      | 21 | 788759            | 790111  | 801571  | 802140  | 829389  | 829763  | 787121  | 788473  | 744088  | 745440  | 726725  | 725373  | 1584367 | 1583015 | 333154  | 334506  | 585959  | 584607 | 677128  | 678480  |         |
| 1549 BPSS1476                      | 21 | 786977            | 788443  | 799789  | 801255  | 827607  | 829073  | 785339  | 786805  | 742306  | 743772  | 728507  | 727041  | 1586149 | 1584683 | 331372  | 332838  | 587741  | 586275 | 675346  | 676812  |         |
| 1550 BPSS1477                      | 21 | 786805            | 786080  | 799617  | 798892  | 827435  | 826710  | 785167  | 784442  | 742134  | 741409  | 728679  | 729404  | 1586321 | 1587046 | 331200  | 330475  | 587913  | 588638 | 675174  | 674449  |         |
| 1551 BPSS1478                      | 21 | 786055            | 784850  | 798867  | 797662  | 826685  | 825480  | 784417  | 783212  | 741384  | 740179  | 729429  | 730634  | 1587071 | 1588276 | 330450  | 329245  | 588663  | 589868 | 674424  | 673219  |         |
| 1552 BPSS1479                      | 21 | 784798            | 783770  | 797610  | 796582  | 825428  | 824400  | 783160  | 782132  | 740127  | 739099  | 730686  | 731714  | 1588328 | 1589356 | 329193  | 328165  | 589920  | 590948 | 673167  | 672139  |         |
| 1553 BPSS1480                      | 21 | 782814            | 782632  | 795626  | 795444  | 823444  | 823262  | 781176  | 780994  | 738158  | 737976  | 732657  | 732839  | 1590299 | 1590481 | 327217  | 327035  | 591905  | 592087 | 671182  | 671000  |         |
| 1554 BPSS1481                      | 21 | 782516            | 781641  | 795328  | 794453  | 823146  | 822271  | 780878  | 780018  | 737860  | 736985  | 732955  | 733830  | 1590597 | 1591472 | 326919  | 326044  | 592203  | 593078 | 670884  | 670009  |         |
| 1555 BPSS1482                      | 21 | 781193            | 780342  | 794005  | 793154  | 821823  | 820972  | 779779  | 778928  | 736544  | 735693  | 734278  | 735129  | 1591934 | 1592785 | 325624  | 324773  | 593554  | 594405 | 669582  | 668731  |         |
| 1556 BPSS1483                      | 21 | 779059            | 780081  | 791871  | 792893  | 819689  | 820711  | 777645  | 778667  | 734410  | 735432  | 736403  | 735390  | 1594059 | 1593046 | 323394  | 324221  | 595688  | 594666 | 667401  | 668417  |         |
| 1557 BPSS1484                      | 21 | 778947            | 777733  | 791759  | 790545  | 819577  | 818363  | 777533  | 776319  | 734298  | 733084  | 736515  | 737729  | 1594171 | 1595385 | 323282  | 322068  | 595800  | 597014 | 667289  | 666075  |         |
| 1558 BPSS1485                      | 21 | 777733            | 776888  | 790545  | 789700  | 818363  | 817518  | 776319  | 775474  | 733084  | 732239  | 737729  | 738574  | 1595385 | 1596230 | 322068  | 321223  | 597014  | 597859 | 666075  | 665230  |         |
| 1559 BPSS1486                      | 21 | 776839            | 776402  | 789651  | 789214  | 817469  | 817032  | 775425  | 774988  | 732190  | 731753  | 738623  | 739060  | 1596279 | 1596716 | 321174  | 320737  | 597908  | 598345 | 665181  | 664744  |         |
| 1560 BPSS1487                      | 21 | 775991            | 774432  | 788803  | 787244  | 816621  | 815062  | 774577  | 773018  | 731342  | 729783  | 739471  | 741030  | 1597127 | 1598686 | 320322  | 318763  | 598756  | 600315 | 664333  | 662774  |         |
| 1561 BPSS1488                      | 21 | 774404            | 773571  | 787216  | 786383  | 815034  | 814201  | 772990  | 772157  | 729755  | 728922  | 741058  | 741891  | 1598714 | 1599547 | 318735  | 317902  | 600343  | 601176 | 662646  | 661972  |         |
| 1562 BPSS1489                      | 21 | 773571            | 772960  | 786383  | 785772  | 814201  | 813590  | 772157  | 771546  | 728922  | 728311  | 741891  | 742502  | 1599547 | 1600158 | 317902  | 317291  | 601176  | 601787 | 661972  | 661361  |         |
| 1563 BPSS1490                      | 21 | 771918            | 770896  | 784730  | 783708  | 812548  | 811526  | 770504  | 769482  | 727269  | 726247  | 743544  | 744566  | 1601200 | 1602222 | 316249  | 315227  | 602829  | 603851 | 660319  | 659297  |         |
| 1564 BPSS1491                      | 21 | 770605            | 769391  | 783417  | 782203  | 811235  | 810021  | 769191  | 767977  | 725956  | 724742  | 744857  | 746071  | 1602513 | 1603727 | 314936  | 313722  | 604142  | 605356 | 659006  | 657792  |         |
| 1565 BPSS1492_hypothetical protein | 21 |                   |         |         |         |         |         |         |         |         |         |         |         |         |         |         |         |         |        |         |         |         |
| 1566 BPSS1493                      | 21 | 765507            | 767429  | 778333  | 780255  | 806137  | 808059  | 764093  | 766015  | 721472  | 722749  | 749941  | 748037  | 1607624 | 1605675 | 309856  | 311760  | 608655  | 607366 | 654479  | 655768  |         |
| 1567 BPSS1494                      | 21 | 764773            | 765507  | 777599  | 778333  | 805403  | 806137  | 763359  | 764093  | 720138  | 720872  | 750675  | 749941  | 1608358 | 1607624 | 309122  | 309856  | 609986  | 609252 | 653148  | 653882  |         |
| 1568 BPSS1495                      | 21 | 762932            | 764773  | 775758  | 777599  | 803562  | 805403  | 761518  | 763359  | 718297  | 720138  | 752519  | 750675  | 1610199 | 1608358 | 307281  | 309122  | 611827  | 609986 | 651307  | 653148  |         |
| 1569 BPSS1496                      | 21 | 762672            | 762181  | 775498  | 775007  | 803302  | 802811  | 761258  | 760767  | 718037  | 717546  | 752779  | 753270  | 1610459 | 1610950 | 307021  | 306530  | 612087  | 612578 | 651047  | 650556  |         |
| 1570 BPSS1497                      | 21 | 762154            | 760658  | 774980  | 773484  | 802784  | 801288  | 760740  | 759244  | 717519  | 716023  | 753297  | 754793  | 1610977 | 1612473 | 306503  | 305007  | 612605  | 614101 | 650529  | 649033  |         |
| 1571 BPSS1498                      | 21 | 760435            | 759929  | 773261  | 772755  | 801065  | 800559  | 759021  | 758515  | 715800  | 715294  | 755016  | 755522  | 1612696 | 1613202 | 304784  | 304278  | 614324  | 614830 | 648810  | 648304  |         |
| 1572 BPSS1499                      | 21 | 759933            | 759475  | 772759  | 772301  | 800563  | 800105  | 758519  | 758061  | 715298  | 714840  | 755518  | 755976  | 1613198 | 1613656 | 304282  | 303824  | 614826  | 615284 | 648308  | 647850  |         |
| 1573 BPSS1500                      | 21 | 759435            | 757696  | 772261  | 770522  | 800065  | 798326  | 758021  | 756282  | 714800  | 713061  | 756016  | 757755  | 1613696 | 1615435 | 303784  | 302045  | 615324  | 617063 | 647810  | 646071  |         |
| 1574 BPSS1501                      | 21 | 757705            | 756686  | 770531  | 769512  | 798335  | 797505  | 756291  | 755272  | 713070  | 712051  | 757746  | 758765  | 1615426 | 1616445 | 302054  | 301035  | 617054  | 618073 | 646080  | 645061  |         |
| 1575 BPSS1502                      | 21 | 756696            | 753655  | 769522  | 766481  | 797183  | 794142  | 755282  | 752214  | 712061  | 709020  | 758755  | 761805  | 1616435 | 1619479 | 301045  | 298004  | 618063  | 621104 | 645071  | 645006  |         |
| 1576 BPSS1503                      | 21 | 753586            | 750566  | 766412  | 763392  | 794073  | 791053  | 752145  | 749125  | 708888  | 705868  | 761865  | 764885  | 1619509 | 1622529 | 297962  | 294942  | 621182  | 624202 | 642061  | 639041  |         |
| 1577 BPSS1504                      | 21 | 750537            | 747898  | 763363  | 760724  | 791024  | 788385  | 749096  | 746457  | 705839  | 703200  | 764914  | 767553  | 1622558 | 1625197 | 294913  | 292274  | 624231  | 626870 | 639012  | 636373  |         |
| 1578 BPSS1505                      | 21 | 747877            | 746816  | 760703  | 759642  | 788364  | 787303  | 746436  | 745375  | 703179  | 702118  | 767574  | 768635  | 1625218 | 1626279 | 292253  | 291192  | 626891  | 627952 | 636352  | 635291  |         |
| 1579 BPSS1506                      | 21 | 746816            | 746058  | 759642  | 758884  | 787303  | 786545  | 745375  | 744617  | 702118  | 701360  | 768635  | 769393  | 1626279 | 1627037 | 291192  | 290434  | 627952  | 628710 | 635291  | 634533  |         |
| 1580 BPSS1507                      | 21 | 746026            | 745637  | 758852  | 758463  | 786513  | 786124  | 744585  | 744196  | 701328  | 700939  | 769425  | 769814  | 1627069 | 1627458 | 290402  | 290013  | 628742  | 629131 | 634501  | 634112  |         |
| 1581 BPSS1508                      | 21 | 745504            | 744830  | 758330  | 757656  | 785991  | 785317  | 744063  | 743389  | 700806  | 700132  | 769947  | 770621  | 1627591 | 1628265 | 289880  | 289206  | 629264  | 629938 | 633979  | 633305  |         |
| 1582 BPSS1509                      | 21 | 744830            | 743400  | 757656  | 756226  | 785317  | 783887  | 743389  | 741959  | 700132  | 698702  | 770621  | 772051  | 1628265 | 1629695 | 289206  | 287776  | 629938  | 631368 | 633305  | 631875  |         |
| 1583 BPSS1510                      | 21 | 743382            | 742738  | 756208  | 755564  | 783869  | 783225  | 741941  | 741297  | 698684  | 698040  | 772069  | 772713  | 1629713 | 1630357 | 287758  | 287114  | 631386  | 632030 | 631857  | 631213  |         |
| 1584 BPSS1511                      | 21 | 740992            | 738695  | 753818  | 751521  | 783210  | 781831  | 739551  | 737254  | 698025  | 694078  | 772728  | 776693  | 1630372 | 1634328 | 287099  | 283143  | 633875  | 636109 | 631198  | 630812  |         |
| 1585 BPSS1512                      | 21 | 737589            | 736738  | 750415  | 749564  | 777482  | 776631  | 736148  | 735297  | 693028  | 692177  | 777767  | 778618  | 1635434 | 1636285 | 282085  | 281234  | 637199  | 638050 | 626540  | 625689  |         |
| 1586 BPSS1513                      | 21 | 736571            | 736281  | 749397  | 749107  | 776464  | 776174  | 735130  | 734840  | 692010  | 691720  | 778785  | 779075  | 1636452 | 1636742 | 281067  | 280777  | 638217  | 638507 | 625522  | 625232  |         |
| 1587 BPSS1514                      | 21 | 736273            | 735644  | 749099  | 748470  | 776166  | 775537  | 734832  | 734203  | 691712  | 691083  | 779083  | 779712  | 1636750 | 1637379 | 280769  | 280140  | 638515  | 639144 | 625244  | 624595  |         |
| 1588 BPSS1515                      | 21 | 735527            | 735225  | 748353  | 748051  | 775420  | 775118  | 734086  | 733784  | 690966  | 690664  | 779829  | 780131  | 1637496 | 1637798 | 280023  | 279721  | 639261  | 639563 | 624478  | 624176  |         |
| 1589                               |    | Chr2_57a_IS407A_A | 733880  | 735115  | 746706  | 747941  | 773773  | 775008  | 732439  | 733674  | 689319  | 690554  | 780241  | 781476  | 1637908 | 1639143 | 278376  | 279611  | 639673 | 640908  | 622831  | 624066  |
| 1590                               |    | Chr2_57b_IS407A_A | 1643058 | 1644293 | 1673540 | 1674775 | 1637867 | 1639102 | 1636577 | 1637812 | 1605359 | 1606594 | 2142275 | 2143510 | 714504  | 715739  | 1194967 | 1196202 |        |         | 1511320 | 1512555 |
| 1591 BPSS1516                      | 22 |                   |         |         |         |         |         |         |         | 1607916 | 1606546 | 2140953 | 2142275 | 713182  | 714504  | 1197524 | 1196202 |         |        | 1513877 | 1512555 |         |
| 1592 BPSS1517                      | 22 | 1645619           | 1645179 | 1676101 | 1675661 | 1640428 | 1639988 | 1639138 | 1638698 | 1608511 | 1608071 | 2140358 | 2140798 | 712587  | 713027  | 1198119 | 1197679 |         |        | 1514472 | 1514032 |         |
| 1593 BPSS1518                      | 22 | 1645979           | 1645701 | 1676461 | 1676183 | 1640788 | 1640510 | 1639498 | 1639220 | 1608871 | 1608593 | 2139998 | 2140276 | 712227  | 712505  | 1198479 | 1198201 |         |        |         |         |         |

|               |    |         |         |         |         |         |         |         |         |         |         |         |         |        |        |         |         |         |         |
|---------------|----|---------|---------|---------|---------|---------|---------|---------|---------|---------|---------|---------|---------|--------|--------|---------|---------|---------|---------|
| 1594 BPSS1519 | 22 | 1645897 | 1646445 | 1676379 | 1676927 | 1640706 | 1641254 | 1639416 | 1639964 | 1608789 | 1609337 | 2140080 | 2139532 | 712309 | 711761 | 1198397 | 1198945 | 1514750 | 1515298 |
| 1595 BPSS1520 | 22 | 1647593 | 1646535 | 1678075 | 1677017 | 1642402 | 1641344 | 1641112 | 1640054 | 1610485 | 1609427 | 2138384 | 2139442 | 710613 | 711671 | 1200093 | 1199035 | 1516446 | 1515388 |
| 1596 BPSS1521 | 22 | 1648419 | 1647979 | 1678901 | 1678461 | 1644000 | 1643560 | 1641938 | 1641498 | 1611332 | 1610892 | 2137544 | 2137984 | 709779 | 710219 | 1200926 | 1200486 | 1517287 | 1516847 |
| 1597 BPSS1522 | 22 | 1649346 | 1648678 | 1679828 | 1679160 | 1644927 | 1644259 | 1642865 | 1642197 | 1612259 | 1611591 | 2136617 | 2137285 | 708852 | 709520 | 1201853 | 1201185 | 1518214 | 1517546 |
| 1598 BPSS1523 | 22 | 1650045 | 1649593 | 1680527 | 1680075 | 1645626 | 1645174 | 1643564 | 1643112 | 1612958 | 1612506 | 2135918 | 2136370 | 708153 | 708605 | 1202552 | 1202100 | 1518913 | 1518461 |
| 1599 BPSS1524 | 22 | 1651735 | 1650200 | 1682217 | 1680682 | 1647316 | 1645781 | 1645254 | 1643719 | 1614648 | 1613113 | 2134228 | 2135763 | 706463 | 707998 | 1204424 | 1202707 | 1520603 | 1519068 |
| 1600 BPSS1525 | 22 | 1652361 | 1653143 | 1682843 | 1683625 | 1647942 | 1648724 | 1645880 | 1646662 | 1615274 | 1616056 | 2133602 | 2132820 | 705837 | 705055 | 1204799 | 1205581 | 1521229 | 1522011 |
| 1601 BPSS1526 | 22 | 1654160 | 1653600 | 1684642 | 1684082 | 1649741 | 1649181 | 1647679 | 1647119 | 1617064 | 1616504 | 2131749 | 2132309 | 703948 | 704508 | 1206661 | 1206101 | 1523172 | 1522612 |
| 1602 BPSS1527 | 22 | 1654438 | 1654160 | 1684920 | 1684642 | 1650019 | 1649741 | 1647957 | 1647679 | 1617342 | 1617064 | 2131471 | 2131749 | 703670 | 703948 | 1206939 | 1206661 | 1523450 | 1523172 |
| 1603 BPSS1528 | 22 | 1657128 | 1654555 | 1687815 | 1687132 | 1652673 | 1650136 | 1650647 | 1648074 | 1620041 | 1617522 | 2128787 | 2131471 | 700995 | 703670 | 1209623 | 1206939 | 1526140 | 1525229 |
| 1604 BPSS1529 | 22 | 1658162 | 1657233 | 1688849 | 1687920 | 1654156 | 1653227 | 1651681 | 1650752 | 1621075 | 1620146 | 2127753 | 2128682 | 699961 | 700890 | 1210657 | 1209728 | 1527174 | 1526245 |
| 1605 BPSS1530 | 22 | 1658526 | 1658227 | 1689213 | 1688914 | 1654520 | 1654221 | 1652045 | 1651746 | 1621439 | 1621140 | 2127389 | 2127688 | 699597 | 699896 | 1211021 | 1210722 | 1527538 | 1527239 |
| 1606 BPSS1531 | 22 | 1659907 | 1658651 | 1690826 | 1690296 | 1655901 | 1654645 | 1653426 | 1652170 | 1622820 | 1621564 | 2126008 | 2127264 | 698216 | 699472 | 1212402 | 1211146 | 1528919 | 1527663 |
| 1607 BPSS1532 | 22 | 1661811 | 1659952 | 1692730 | 1690871 | 1657805 | 1655946 | 1655330 | 1653471 | 1624724 | 1622865 | 2124104 | 2125963 | 696312 | 698171 | 1214306 | 1212447 | 1530823 | 1528964 |
| 1608 BPSS1533 | 22 | 1662345 | 1661833 | 1693264 | 1692752 | 1658339 | 1657827 | 1658339 | 1655352 | 1625258 | 1624746 | 2123570 | 2124082 | 695778 | 696290 | 1214840 | 1214328 | 1531357 | 1530845 |
| 1609 BPSS1534 | 22 | 1663706 | 1662474 | 1694625 | 1693393 | 1659700 | 1658468 | 1657225 | 1655993 | 1626619 | 1625387 | 2122209 | 2123441 | 694417 | 695649 | 1216201 | 1214969 | 1532718 | 1531486 |
| 1610 BPSS1535 | 22 | 1664465 | 1663713 | 1695384 | 1694632 | 1660459 | 1659707 | 1657984 | 1657232 | 1627378 | 1626626 | 2121450 | 2122202 | 693658 | 694410 | 1216960 | 1216208 | 1533477 | 1532725 |
| 1611 BPSS1536 | 22 | 1664753 | 1664502 | 1695672 | 1695421 | 1660747 | 1660496 | 1658272 | 1658021 | 1627666 | 1627415 | 2121162 | 2121413 | 693370 | 693621 | 1217248 | 1216997 | 1533765 | 1533514 |
| 1612 BPSS1537 | 22 | 1665469 | 1664792 | 1696388 | 1695711 | 1661463 | 1660786 | 1658988 | 1658311 | 1628382 | 1627705 | 2120446 | 2121123 | 692654 | 693331 | 1217964 | 1217287 | 1534481 | 1533804 |
| 1613 BPSS1538 | 22 | 1666442 | 1665462 | 1697361 | 1696381 | 1662436 | 1661456 | 1659961 | 1658981 | 1629355 | 1628375 | 2119449 | 2120453 | 691657 | 692661 | 1218961 | 1217957 | 1535466 | 1534474 |
| 1614 BPSS1539 | 22 | 1667686 | 1666442 | 1698605 | 1697361 | 1662849 | 1662436 |         |         | 1630599 | 1629355 | 2118205 | 2119449 | 690413 | 691657 |         |         | 1535819 | 1535466 |
| 1615 BPSS1540 | 22 | 1668128 | 1667667 | 1699047 | 1698586 | 1664899 | 1664438 | 1661601 | 1661140 | 1631041 | 1630580 | 2117763 | 2118224 | 689971 | 690432 | 1220647 | 1220186 | 1536790 | 1536329 |
| 1616 BPSS1541 | 22 | 1669435 | 1668128 | 1700354 | 1699047 | 1666206 | 1664899 | 1662908 | 1661601 | 1632348 | 1631041 | 2116456 | 2117763 | 688664 | 689971 | 1221954 | 1220647 | 1538097 | 1536790 |
| 1617 BPSS1542 | 22 | 1669839 | 1669435 | 1700758 | 1700354 | 1666610 | 1666206 | 1663312 | 1662908 | 1632752 | 1632348 | 2116052 | 2116456 | 688260 | 688664 | 1222358 | 1221954 | 1538501 | 1538097 |
| 1618 BPSS1543 | 22 | 1671923 | 1669854 | 1702842 | 1700773 | 1668694 | 1666625 | 1665396 | 1663327 | 1634836 | 1632767 | 2113968 | 2116037 | 686176 | 688245 | 1224442 | 1222373 | 1540585 | 1538516 |
| 1619 BPSS1544 | 22 | 1673080 | 1671962 | 1703999 | 1702881 | 1669851 | 1668733 | 1666553 | 1665435 | 1635993 | 1634875 | 2112811 | 2113929 | 685019 | 686137 | 1225599 | 1224481 | 1541742 | 1540624 |
| 1620 BPSS1545 | 22 | 1674954 | 1673080 | 1706387 | 1706145 | 1672352 | 1671861 | 1666553 | 1666553 | 1637867 | 1635993 | 2110937 | 2112811 | 683145 | 685019 | 1227473 | 1225599 | 1543489 | 1543424 |
| 1621 BPSS1546 | 22 | 1675609 | 1674971 | 1707042 | 1706404 | 1673007 | 1672369 | 1669082 | 1668444 | 1638522 | 1637884 | 2110282 | 2110920 | 682490 | 683128 | 1228128 | 1227490 | 1544144 | 1543506 |
| 1622 BPSS1547 | 22 | 1676120 | 1677403 | 1707553 | 1708176 | 1673518 | 1674801 | 1669593 | 1670876 | 1639033 | 1640316 | 2109771 | 2108488 | 681979 | 680696 | 1228639 | 1229922 | 1544655 | 1545938 |
| 1623 BPSS1548 | 22 | 1677403 | 1677669 | 1709078 | 1709344 | 1674801 | 1675067 | 1670876 | 1671142 | 1640316 | 1640582 | 2108488 | 2108222 | 680696 | 680430 | 1229922 | 1230188 | 1545938 | 1546204 |
| 1624 BPSS1549 | 22 | 1677727 | 1678026 | 1709402 | 1709701 | 1675125 | 1675424 | 1671200 | 1671499 | 1640640 | 1640939 | 2108164 | 2107865 | 680372 | 680073 | 1230246 | 1230545 | 1546262 | 1546561 |
| 1625 BPSS1550 | 22 | 1678034 | 1678981 | 1709709 | 1710434 | 1675432 | 1676022 | 1671507 | 1672379 | 1640947 | 1641903 | 2107857 | 2106910 | 680065 | 679118 | 1230553 | 1231434 | 1546569 | 1547195 |
| 1626 BPSS1551 | 22 | 1678981 | 1679565 | 2357503 | 2357745 | 1677391 | 1677975 | 1672397 | 1672981 | 1641895 | 1642479 | 2106910 | 2106326 | 679118 | 678534 | 1231575 | 1232159 | 1547298 | 1547825 |
| 1627 BPSS1552 | 22 | 1679537 | 1680328 | 2357717 | 2358301 | 1677947 | 1678561 | 1672953 | 1673744 | 1642451 | 1643242 | 2106354 | 2105563 | 678562 | 677771 | 1232131 | 1232922 | 1547797 | 1548588 |
| 1628 BPSS1553 | 22 | 1681325 | 1682293 | 1712424 | 1713392 | 1679727 | 1680656 | 1674741 | 1675709 | 1644239 | 1645207 | 2104571 | 2103603 | 676779 | 675811 | 1233914 | 1234882 | 1549585 | 1550553 |
| 1629 BPSS1554 | 22 | 1682308 | 1682745 | 1713407 | 1713844 | 1680985 | 1681323 | 1675724 | 1676161 | 1645222 | 1645659 | 2103588 | 2103151 | 675796 | 675359 | 1234897 | 1235334 | 1550568 | 1551005 |
| 1630 BPSS1555 | 22 | 1683758 | 1685452 | 1714857 | 1716551 | 1682336 | 1684030 | 1677174 | 1678868 | 1646672 | 1648366 | 2102138 | 2100444 | 674346 | 672652 | 1236347 | 1238077 | 1552018 | 1553712 |
| 1631 BPSS1556 | 22 | 1687049 | 1686564 | 1718184 | 1717663 | 1685627 | 1685142 | 1680465 | 1679980 | 1649963 | 1649478 | 2098847 | 2099332 | 671055 | 671540 | 1239674 | 1239189 | 1555309 | 1554824 |
| 1632 BPSS1557 | 22 | 1687376 | 1687831 | 1718475 | 1718930 | 1685954 | 1686409 | 1680792 | 1681247 | 1650290 | 1650745 | 2098520 | 2098065 | 670728 | 670273 | 1240001 | 1240456 | 1555636 | 1556091 |
| 1633 BPSS1558 | 22 | 1688398 | 1689714 | 1719497 | 1720813 | 1686976 | 1688292 | 1681814 | 1683130 | 1651312 | 1652628 | 2097498 | 2096182 | 669706 | 668390 | 1241023 | 1242339 | 1556658 | 1557974 |
| 1634 BPSS1559 | 22 | 1690965 | 1690081 | 1722064 | 1721180 | 1689543 | 1688659 | 1684381 | 1683497 | 1653879 | 1652995 | 2094931 | 2095815 | 667139 | 668023 | 1243590 | 1242706 | 1559225 | 1558341 |
| 1635 BPSS1560 | 22 | 1691066 | 1692286 | 1722165 | 1723385 | 1689644 | 1690864 | 1684482 | 1685702 | 1653980 | 1655200 | 2094830 | 2093610 | 667038 | 665818 | 1243691 | 1244911 | 1559326 | 1560546 |
| 1636 BPSS1561 | 22 | 1694077 | 1692416 | 1725176 | 1723515 | 1692655 | 1690994 | 1687493 | 1685832 | 1656991 | 1655330 | 2091819 | 2093480 | 664027 | 665688 | 1246702 | 1245041 | 1562337 | 1560676 |
| 1637 BPSS1562 | 22 | 1696408 | 1694837 | 1727507 | 1725936 | 1694986 | 1693415 | 1689824 | 1688253 | 1659295 | 1657724 | 2089518 | 2091104 | 661663 | 663249 | 1249076 | 1247490 | 1564650 | 1563079 |
| 1638 BPSS1563 | 22 | 1697453 | 1696842 | 1728552 | 1727941 | 1696301 | 1695420 | 1690869 | 1690258 | 1663040 | 1659729 | 2088473 | 2089084 | 660618 | 661229 | 1250121 | 1249510 | 1565695 | 1565084 |
| 1639 BPSS1564 | 22 | 1697587 | 1698048 | 1728686 | 1729147 | 1696165 | 1696626 | 1691003 | 1691464 | 1660474 | 1660935 | 2088339 | 2087878 | 660484 | 660023 | 1250255 | 1250716 | 1565829 | 1566290 |
| 1640 BPSS1565 | 22 | 1698378 | 1698776 | 1729477 | 1729875 | 1696956 | 1697354 | 1691794 | 1692192 | 1661265 | 1661663 | 2087516 | 2087118 | 659653 | 659255 | 1251118 | 1251516 | 1566620 | 1567018 |
| 1641 BPSS1566 | 22 | 1699173 | 1700756 | 1730272 | 1731855 | 1697751 | 1699334 | 1692589 | 1694172 | 1662060 | 1663643 | 2086721 | 2085138 | 658858 | 657275 | 1251913 | 1253496 | 1567415 | 1568998 |
| 1642 BPSS1567 | 22 | 1700909 | 1701688 | 1732008 | 1732787 | 1699487 | 1700266 | 1694325 | 1695104 | 1663796 | 1664575 | 2084985 | 2084206 | 657122 | 656343 | 1253649 | 1254428 | 1569151 | 1569930 |
| 1643 BPSS1568 | 22 | 1702271 | 1703875 | 1733370 | 1734974 | 1700849 | 1702453 | 1695687 | 1697291 | 1665158 | 1666762 | 2083623 | 2082019 | 655760 | 654156 | 1255011 | 1256615 | 1570513 | 1572117 |
| 1644 BPSS1569 | 22 | 1704646 | 1705335 | 1735745 | 1736434 | 1703224 | 1703913 | 1698062 | 1698751 | 1667533 | 1668222 | 2081248 | 2080559 | 653385 | 652696 | 1257386 | 1258075 | 1572888 | 1573577 |

|                |    |         |         |         |         |         |         |         |         |         |         |         |         |        |        |         |         |         |         |
|----------------|----|---------|---------|---------|---------|---------|---------|---------|---------|---------|---------|---------|---------|--------|--------|---------|---------|---------|---------|
| 1645 BPSS1570  | 22 | 1705664 | 1706269 | 1736763 | 1737368 | 1704242 | 1704847 | 1699080 | 1699685 | 1668551 | 1669156 | 2080230 | 2079625 | 652367 | 651762 | 1258404 | 1259009 | 1573906 | 1574511 |
| 1646 BPSS1571  | 22 | 1706566 | 1707927 | 1737665 | 1739026 | 1705144 | 1706379 | 1699982 | 1701343 | 1669453 | 1670814 | 2079328 | 2077967 | 651465 | 650104 | 1259306 | 1260667 | 1574808 | 1576169 |
| 1647 BPSS1572  | 22 | 1709133 | 1708279 | 1740232 | 1739378 | 1708638 | 1707784 | 1702549 | 1701695 | 1672020 | 1671166 | 2076761 | 2077615 | 648898 | 649752 | 1261873 | 1261019 | 1577375 | 1576521 |
| 1648 BPSS1573  | 22 | 1709912 | 1709133 | 1741011 | 1740232 | 1709417 | 1708638 | 1703328 | 1702549 | 1672799 | 1672020 | 2075982 | 2076761 | 648119 | 648898 | 1262652 | 1261873 | 1578154 | 1577375 |
| 1649 BPSS1574  | 22 | 1710682 | 1709936 | 1741781 | 1741035 | 1710187 | 1709441 | 1704098 | 1703352 | 1673569 | 1672823 | 2075212 | 2075958 | 647349 | 648095 | 1263422 | 1262676 | 1578924 | 1578178 |
| 1650 BPSS1575  | 22 | 1710630 | 1710932 | 1741729 | 1742031 | 1710135 | 1710437 | 1704046 | 1704348 | 1673517 | 1673819 | 2075264 | 2074962 | 647401 | 647099 | 1263370 | 1263672 | 1578872 | 1579174 |
| 1651 BPSS1576  | 22 | 1712924 | 1711371 | 1744023 | 1742470 | 1712429 | 1710876 | 1706340 | 1704787 | 1675811 | 1674258 | 2072970 | 2074523 | 645107 | 646660 | 1265664 | 1264111 | 1581166 | 1579613 |
| 1652 BPSS1577  | 22 | 1715504 | 1712961 | 1746603 | 1744060 | 1715009 | 1712466 | 1708910 | 1708137 | 1678379 | 1675848 | 2070390 | 2072933 | 642527 | 645070 | 1268244 | 1265701 | 1583733 | 1583443 |
| 1653 BPSS1578  | 22 | 1716364 | 1715504 | 1747463 | 1746603 | 1715869 | 1715009 | 1709770 | 1708910 | 1679239 | 1678379 | 2069530 | 2070390 | 641667 | 642527 | 1269104 | 1268244 | 1584593 | 1583733 |
| 1654 BPSS1579  | 22 | 1718819 | 1716573 | 1749918 | 1747672 | 1719108 | 1717303 | 1712225 | 1709979 | 1681694 | 1679448 | 2067075 | 2069321 | 639212 | 641458 | 1271559 | 1269313 | 1586992 | 1586927 |
| 1655 BPSS1580  | 22 | 1723287 | 1718848 | 1752646 | 1749947 | 1723576 | 1719137 | 1716693 | 1712254 | 1686157 | 1687304 | 2062607 | 2067046 | 634744 | 639183 | 1276027 | 1271588 |         |         |
| 1656 BPSS1581  | 22 | 1724861 | 1723569 | 1756220 | 1756149 | 1725927 | 1725853 | 1718066 | 1716975 | 1687734 | 1686439 | 2061033 | 2062325 | 633170 | 634462 | 1277451 | 1276309 | 1591456 | 1590323 |
| 1657 BPSS1582  | 22 | 1727268 | 1725118 | 1758627 | 1756477 | 1728334 | 1726184 | 1720607 | 1718457 | 1690141 | 1687991 | 2058644 | 2060794 | 630781 | 632931 | 1280187 | 1278037 | 1594164 | 1592014 |
| 1658 BPSS1582a | 22 | 1727858 | 1728418 | 1759237 | 1759797 | 1729663 | 1730223 | 1721197 | 1721757 | 1690731 | 1691291 | 2058054 | 2057494 | 630191 | 629631 | 1280777 | 1281337 | 1594754 | 1595314 |
| 1659 BPSS1583  | 22 | 1728577 | 1738978 | 1759596 | 1760357 | 1730382 | 1730783 | 1721916 | 1722317 | 1691450 | 1691851 | 2057335 | 2056934 | 629472 | 629071 | 1281496 | 1281897 | 1595473 | 1595874 |
| 1660 BPSS1584  | 22 | 1728978 | 1730327 | 1760357 | 1761706 | 1730783 | 1732132 | 1722317 | 1723666 | 1691851 | 1693200 | 2056934 | 2055585 | 629071 | 627722 | 1281897 | 1283246 | 1595874 | 1597223 |
| 1661 BPSS1585  | 22 | 1730939 | 1730490 | 1762318 | 1761869 | 1732744 | 1732295 | 1724278 | 1723829 | 1693845 | 1693396 | 2054962 | 2055411 | 627099 | 627548 | 1283869 | 1283420 | 1597846 | 1597397 |
| 1662 BPSS1586  | 22 | 1732263 | 1731352 | 1763642 | 1762731 | 1734068 | 1733157 | 1725602 | 1724691 | 1695169 | 1694258 | 2053617 | 2054528 | 625754 | 626665 | 1285200 | 1284289 | 1599163 | 1598252 |
| 1663 BPSS1587  | 22 | 1732430 | 1733380 | 1763809 | 1764759 | 1734235 | 1735185 | 1725769 | 1726719 | 1695336 | 1696286 | 2053450 | 2052500 | 625587 | 624637 | 1285367 | 1286317 | 1599330 | 1600280 |
| 1664 BPSS1588  | 22 | 1733994 | 1735391 | 1765373 | 1766770 | 1736632 | 1738029 | 1727333 | 1728730 | 1696900 | 1698297 | 2051886 | 2050489 | 624023 | 622626 | 1286931 | 1288328 | 1600894 | 1602291 |
| 1665 BPSS1589  | 22 | 1736740 | 1737537 | 1768119 | 1768916 | 1739378 | 1740175 | 1730079 | 1730876 | 1699645 | 1700442 | 2049149 | 2048352 | 621295 | 620498 | 1289675 | 1290472 | 1603646 | 1604443 |
| 1666 BPSS1590  | 22 | 1737795 | 1738013 | 1769174 | 1769392 | 1740433 | 1740651 | 1731134 | 1731352 | 1700700 | 1700918 | 2048094 | 2047876 | 620240 | 620022 | 1290730 | 1290948 | 1604701 | 1604919 |
| 1667 BPSS1591  | 22 | 1738167 | 1739048 | 1769546 | 1770427 | 1740805 | 1741686 | 1731506 | 1732387 | 1701072 | 1701953 | 2047722 | 2046841 | 619868 | 618987 | 1291102 | 1291983 | 1605073 | 1605954 |
| 1668 BPSS1592  | 22 | 1740918 | 1739122 | 1772297 | 1770501 | 1743556 | 1741760 | 1734277 | 1733639 | 1703823 | 1702027 | 2044971 | 2046767 | 617117 | 618913 | 1293853 | 1292057 | 1607824 | 1606028 |
| 1669 BPSS1593  | 22 | 1742706 | 1741048 | 1774085 | 1772427 | 1745344 | 1743686 | 1736065 | 1734407 | 1705611 | 1703953 | 2043183 | 2044841 | 615329 | 616987 | 1295641 | 1293983 | 1609612 | 1607954 |
| 1670 BPSS1594  | 22 | 1743194 | 1742718 | 1774573 | 1774097 | 1745832 | 1745356 | 1736553 | 1736077 | 1706099 | 1705623 | 2042695 | 2043171 | 614841 | 615317 | 1296129 | 1295653 | 1610100 | 1609624 |
| 1671 BPSS1595  | 22 | 1743788 | 1743237 | 1775167 | 1774616 | 1746426 | 1745875 | 1737147 | 1736596 | 1706693 | 1706142 | 2042101 | 2042652 | 614247 | 614798 | 1296723 | 1296172 | 1610694 | 1610143 |
| 1672 BPSS1596  | 22 | 1744897 | 1743824 | 1776276 | 1775203 | 1747535 | 1746462 | 1738256 | 1737183 | 1707802 | 1706729 | 2040992 | 2042065 | 613138 | 614211 | 1297832 | 1296759 | 1611803 | 1610730 |
| 1673 BPSS1597  | 22 | 1746497 | 1744890 | 1777876 | 1776269 | 1749135 | 1747528 | 1739856 | 1738249 | 1709402 | 1707795 | 2039392 | 2040999 | 611538 | 613145 | 1299432 | 1297825 | 1613349 | 1611796 |
| 1674 BPSS1598  | 22 | 1746997 | 1746497 | 1778376 | 1777876 | 1749635 | 1749135 | 1740356 | 1739856 | 1709902 | 1709402 | 2038892 | 2039392 | 611038 | 611538 | 1299932 | 1299432 | 1613713 | 1613453 |
| 1675 BPSS1599  | 22 | 1748306 | 1747011 | 1779685 | 1778390 | 1750944 | 1749649 | 1741665 | 1740370 | 1711211 | 1709916 | 2037583 | 2038878 | 609729 | 611024 | 1301241 | 1299946 | 1614945 | 1614625 |
| 1676 BPSS1600  | 22 | 1750090 | 1748321 | 1782134 | 1781664 | 1752728 | 1750959 | 1743302 | 1743039 | 1712997 | 1712965 | 2035799 | 2037568 | 607945 | 609714 | 1303025 | 1301256 | 1616729 | 1614960 |
| 1677 BPSS1601  | 22 | 1750659 | 1750093 | 1782564 | 1782334 | 1754001 | 1753735 | 1743871 | 1743305 | 1713566 | 1713000 | 2035230 | 2035796 | 607376 | 607942 | 1303594 | 1303028 | 1617298 | 1616732 |
| 1678 BPSS1602  | 22 | 1750976 | 1752079 | 1782881 | 1783984 | 1754318 | 1755421 | 1744188 | 1745045 | 1713883 | 1714986 | 2034913 | 2033810 | 607059 | 605956 | 1303911 | 1305014 | 1617615 | 1618718 |
| 1679 BPSS1603  | 22 | 1754093 | 1752306 | 1786200 | 1784863 | 1758263 | 1757406 | 1747251 | 1745464 | 1716257 | 1715475 | 2031796 | 2033583 | 603942 | 605729 | 1307028 | 1305241 | 1620732 | 1618945 |
| 1680 BPSS1604  | 22 | 1754839 | 1754093 | 1786946 | 1786200 | 1759009 | 1758263 | 1747997 | 1747251 | 1717003 | 1716257 | 2031050 | 2031796 | 603196 | 603942 | 1307774 | 1307028 | 1621478 | 1620732 |
| 1681 BPSS1605  | 22 | 1755975 | 1754893 | 1788082 | 1787000 | 1760145 | 1759063 | 1749133 | 1748051 | 1718139 | 1717057 | 2029914 | 2030996 | 602060 | 603142 | 1308910 | 1307828 | 1622614 | 1621532 |
| 1682 BPSS1606  | 22 | 1756747 | 1756106 | 1788854 | 1788213 | 1760917 | 1760276 | 1749905 | 1749264 | 1718911 | 1718270 | 2029142 | 2029783 | 601288 | 601929 | 1309682 | 1309041 | 1623386 | 1622745 |
| 1683 BPSS1607  | 22 | 1756956 | 1757441 | 1789063 | 1789548 | 1761126 | 1761611 | 1750114 | 1750599 | 1719120 | 1719605 | 2028933 | 2028448 | 601079 | 600594 | 1309891 | 1310376 | 1623595 | 1624080 |
| 1684 BPSS1608  | 22 | 1758630 | 1757971 | 1790737 | 1790078 | 1762800 | 1762141 | 1751788 | 1751129 | 1720794 | 1720135 | 2027259 | 2027918 | 599405 | 600064 | 1311565 | 1310906 | 1625262 | 1624603 |
| 1685 BPSS1609  | 22 | 1758839 | 1759075 | 1790946 | 1791182 | 1763009 | 1763245 | 1751997 | 1752233 | 1721003 | 1721239 | 2027050 | 2026814 | 599196 | 598960 | 1311774 | 1312010 | 1625471 | 1625707 |
| 1686 BPSS1610  | 22 | 1761465 | 1760035 | 1793572 | 1792142 | 1765635 | 1764205 | 1754623 | 1753193 | 1723629 | 1722199 | 2024424 | 2025854 | 596570 | 598000 | 1314400 | 1312970 | 1628097 | 1626667 |
| 1687 BPSS1611  | 22 | 1762132 | 1761680 | 1794239 | 1793787 | 1766302 | 1765850 | 1755290 | 1754838 | 1724296 | 1723844 | 2023757 | 2024209 | 595903 | 596355 | 1315067 | 1314615 | 1628764 | 1628312 |
| 1688 BPSS1612  | 22 | 1762413 | 1762228 | 1794520 | 1794335 | 1766583 | 1766398 | 1755571 | 1755386 | 1724577 | 1724392 | 2023476 | 2023661 | 595622 | 595807 | 1315348 | 1315163 | 1629045 | 1628860 |
| 1689 BPSS1613  | 22 | 1762828 | 1762580 | 1795493 | 1795245 | 1772558 | 1772310 | 1755984 | 1755736 | 1724993 | 1724745 | 2023061 | 2023309 | 595207 | 595455 | 1315763 | 1315515 | 1629494 | 1629246 |
| 1690 BPSS1614  | 22 | 1763834 | 1763436 | 1796499 | 1796101 | 1768526 | 1768128 | 1769690 | 1765692 | 1725999 | 1725601 | 2022055 | 2022453 | 594201 | 594599 | 1316769 | 1316371 |         |         |
| 1691 BPSS1615  | 22 | 1764899 | 1764033 | 1797564 | 1796698 | 1769591 | 1768725 | 1758055 | 1757189 | 1727064 | 1726198 | 2020990 | 2021856 | 593136 | 594002 | 1317834 | 1316968 | 1631576 | 1630710 |
| 1692 BPSS1616  | 22 | 1765159 | 1764899 | 1797824 | 1797564 | 1769851 | 1769591 | 1758315 | 1758055 | 1727324 | 1727064 | 2020730 | 2020990 | 592876 | 593136 | 1318094 | 1317834 | 1631836 | 1631576 |
| 1693 BPSS1617  | 22 | 1765850 | 1765203 | 1798515 | 1797868 | 1770542 | 1769895 | 1759006 | 1758359 | 1728015 | 1727368 | 2020039 | 2020866 | 592185 | 592832 | 1318785 | 1318138 | 1632527 | 1631880 |
| 1694 BPSS1618  | 22 | 1767135 | 1765840 | 1800052 | 1799891 | 1771827 | 1770532 | 1760056 | 1759514 | 1729300 | 1728005 | 2018754 | 2020049 | 590900 | 592195 | 1320070 | 1318775 | 1633704 | 1632952 |
| 1695 BPSS1619  | 22 | 1767380 | 1767168 | 1800691 | 1800287 | 1772072 | 1771860 | 1760695 | 1760291 | 1729939 | 1729535 | 2018115 | 2018519 | 590261 | 590665 | 1320709 | 1320305 | 1634343 | 1633939 |





|                                             |    |         |         |         |         |         |         |         |         |         |         |         |         |        |        |         |         |         |         |         |         |
|---------------------------------------------|----|---------|---------|---------|---------|---------|---------|---------|---------|---------|---------|---------|---------|--------|--------|---------|---------|---------|---------|---------|---------|
| 1747 BPSS1672                               | 23 | 1846106 | 1844787 | 1880257 | 1878938 | 1852442 | 1851123 | 1838984 | 1837665 | 1808332 | 1807013 | 1939793 | 1941112 | 511833 | 513152 | 1399085 | 1397766 | 1651690 | 1653009 | 1712559 | 1711240 |
| 1748 BPSS1673                               | 23 | 1847163 | 1846165 | 1881314 | 1880316 | 1853499 | 1852501 | 1840041 | 1839043 | 1809389 | 1808391 | 1938736 | 1939734 | 510776 | 511774 | 1400142 | 1399144 | 1650633 | 1651631 | 1713616 | 1712618 |
| 1749 BPSS1674                               | 23 | 1848419 | 1847469 | 1882570 | 1881620 | 1854755 | 1853805 | 1841268 | 1840318 | 1810662 | 1809712 | 1937463 | 1938413 | 509503 | 510453 | 1401415 | 1400465 | 1649360 | 1650310 | 1714889 | 1713939 |
| 1750 BPSS1675                               | 23 | 1849056 | 1848508 | 1883207 | 1882659 | 1855392 | 1854844 | 1841905 | 1841357 | 1811299 | 1810751 | 1936826 | 1937374 | 508866 | 509414 | 1402052 | 1401504 | 1648723 | 1649271 | 1715526 | 1714978 |
| 1751 BPSS1676                               | 23 | 1851112 | 1850084 | 1885263 | 1884235 | 1857448 | 1856420 | 1843961 | 1842933 | 1813235 | 1812207 | 1934777 | 1935805 | 506804 | 507832 | 1404056 | 1403028 | 1646947 | 1647975 | 1717494 | 1716466 |
| 1752 BPSS1677                               | 23 | 1851793 | 1852023 | 1885944 | 1885973 | 1858129 | 1858359 | 1844635 | 1844865 | 1813948 | 1814178 | 1934094 | 1933864 | 506130 | 505900 | 1404732 | 1404962 | 1646294 | 1646064 | 1718180 | 1718410 |
| 1753 BPSS1678                               | 23 | 1852286 | 1853206 | 1886954 | 1887874 | 1858622 | 1859542 | 1845128 | 1846048 | 1814441 | 1815361 | 1933601 | 1932681 | 505637 | 504717 | 1405225 | 1406145 | 1645801 | 1644881 | 1718673 | 1719593 |
| 1754 BPSS1679                               | 23 | 1853667 | 1854818 | 1888335 | 1889486 | 1860003 | 1861154 | 1846509 | 1847660 | 1815822 | 1816973 | 1932220 | 1931069 | 504256 | 503105 | 1406606 | 1407757 | 1644420 | 1643269 | 1720054 | 1721205 |
| 1755 BPSS1680                               | 23 | 1857021 | 1856602 | 1891689 | 1891270 | 1863357 | 1862938 | 1849863 | 1849444 | 1819176 | 1818757 | 1928851 | 1929270 | 500894 | 501313 | 1409968 | 1409549 | 1641066 | 1641485 | 1723408 | 1722989 |
| 1756 BPSS1681                               | 23 | 1857317 | 1858441 | 1891985 | 1893109 | 1863653 | 1864777 | 1850159 | 1851283 | 1819472 | 1820596 | 1928555 | 1927431 | 500598 | 499474 | 1410264 | 1411388 | 1640770 | 1639646 | 1723704 | 1724828 |
| 1757 BPSS1682                               | 23 | 1859862 | 1858978 | 1894530 | 1893646 | 1866198 | 1865314 | 1866039 | 1858606 | 1822017 | 1821133 | 1926010 | 1926894 | 498053 | 498937 | 1412809 | 1411925 | 1638225 | 1639106 | 1726249 | 1725365 |
| 1758 BPSS1683                               | 23 | 1861299 | 1861670 | 1895183 | 1895965 | 1866851 | 1867633 | 1853357 | 1854139 | 1822670 | 1823452 | 1925357 | 1924575 | 497400 | 496618 | 1413462 | 1414244 | 1637572 | 1636790 | 1726902 | 1727684 |
| 1759 BPSS1684                               | 23 | 1864111 | 1861790 | 1898779 | 1896458 | 1870821 | 1868803 | 1856953 | 1854632 | 1826266 | 1823945 | 1921761 | 1924082 | 493804 | 496125 | 1417058 | 1414737 | 1633976 | 1636297 | 1730498 | 1728177 |
| 1760 BPSS1685                               | 23 | 1865712 | 1862449 | 1900380 | 1898917 | 1872422 | 1870959 | 1858554 | 1857091 | 1827867 | 1826404 | 1920160 | 1921223 | 492203 | 493666 | 1418659 | 1417196 | 1632375 | 1633838 | 1732099 | 1730366 |
| 1761 BPSS1686                               | 23 | 1867197 | 1865764 | 1901865 | 1900432 | 1873907 | 1872474 | 1860039 | 1858606 | 1829352 | 1827919 | 1918675 | 1920108 | 490718 | 492151 | 1420144 | 1418711 | 1630890 | 1632323 | 1733584 | 1732151 |
| 1762 BPSS1687                               | 23 | 1868342 | 1869397 | 1903010 | 1904065 | 1875052 | 1876107 | 1861184 | 1862239 | 1830470 | 1831525 | 1917530 | 1916475 | 489573 | 488518 | 1421289 | 1422344 | 1629745 | 1628690 | 1734729 | 1735784 |
| 1763 BPSS1688                               | 23 | 1869436 | 1870476 | 1904104 | 1905144 | 1876146 | 1877186 | 1862278 | 1863318 | 1831564 | 1832604 | 1916436 | 1915396 | 488479 | 487439 | 1422383 | 1423423 | 1628651 | 1627611 | 1735823 | 1736863 |
| 1764 BPSS1689                               | 23 | 1871317 | 1871424 | 1905134 | 1906021 | 1877176 | 1878063 | 1863308 | 1864195 | 1832594 | 1833481 | 1915406 | 1914519 | 487449 | 486562 | 1423413 | 1424300 | 1627621 | 1626734 | 1736853 | 1737740 |
| 1765 BPSS1690                               | 23 | 1871792 | 1871415 | 1906460 | 1906083 | 1878502 | 1878125 | 1864634 | 1864257 | 1833920 | 1833543 | 1914080 | 1914457 | 486123 | 486500 | 1424739 | 1424362 | 1626295 | 1626672 | 1738179 | 1737802 |
| 1766 BPSS1691                               | 23 | 1873311 | 1872097 | 1907979 | 1906765 | 1880021 | 1878807 | 1866153 | 1864939 | 1835439 | 1834225 | 1912481 | 1913695 | 484524 | 485738 | 1426328 | 1425114 | 1624706 | 1625920 | 1739768 | 1738554 |
| 1767 BPSS1692                               | 23 | 1875075 | 1873543 | 1909743 | 1908211 | 1881785 | 1880253 | 1867917 | 1866385 | 1837203 | 1835671 | 1910717 | 1912249 | 482760 | 484292 | 1428092 | 1426560 | 1622942 | 1624474 | 1741532 | 1740000 |
| 1768 BPSS1693                               | 23 | 1875622 | 1875131 | 1910290 | 1909799 | 1882332 | 1881841 | 1868464 | 1867973 | 1837750 | 1837259 | 1910170 | 1910661 | 482213 | 482704 | 1428639 | 1428148 | 1622395 | 1622886 | 1742079 | 1741588 |
| 1769 BPSS1694                               | 23 | 1876369 | 1875632 | 1911037 | 1910300 | 1883079 | 1882342 | 1869211 | 1868474 | 1838497 | 1837760 | 1909423 | 1910160 | 481466 | 482203 | 1429386 | 1428649 | 1621648 | 1622856 | 1742826 | 1742089 |
| 1770 BPSS1695                               | 23 | 1877787 | 1876477 | 1912455 | 1911145 | 1884497 | 1883187 | 1870629 | 1869319 | 1839915 | 1838605 | 1908005 | 1909315 | 480048 | 481358 | 1430804 | 1429494 | 1620230 | 1621540 | 1744244 | 1742934 |
| 1771 BPSS1696                               | 23 | 1878771 | 1877902 | 1913439 | 1912570 | 1885481 | 1884612 | 1871613 | 1870744 | 1840899 | 1840030 | 1907021 | 1907890 | 479064 | 479933 | 1431788 | 1430919 | 1619246 | 1620115 | 1745228 | 1744359 |
| 1772 BPSS1697                               | 23 | 1879666 | 1878854 | 1914334 | 1913522 | 1886376 | 1885564 | 1872508 | 1871696 | 1841794 | 1840982 | 1906126 | 1906938 | 478169 | 478981 | 1432683 | 1431871 | 1618351 | 1619163 | 1746123 | 1745311 |
| 1773 BPSS1698                               | 23 | 1880558 | 1879713 | 1915226 | 1914381 | 1887268 | 1886423 | 1873400 | 1872555 | 1842686 | 1841841 | 1905234 | 1906079 | 477277 | 478122 | 1433575 | 1432730 | 1617459 | 1618304 | 1747015 | 1746170 |
| 1774 BPSS1699                               | 23 | 1881761 | 1880571 | 1916429 | 1915239 | 1888471 | 1887281 | 1874603 | 1873413 | 1843889 | 1842699 | 1904031 | 1905221 | 476074 | 477264 | 1434778 | 1433588 | 1616256 | 1617446 | 1748218 | 1747028 |
| 1775 BPSS1700                               | 23 | 1882597 | 1881836 | 1917265 | 1916504 | 1889307 | 1888546 | 1875439 | 1874678 | 1844725 | 1843964 | 1903195 | 1903956 | 475238 | 475999 | 1435614 | 1434853 | 1615420 | 1616181 | 1749054 | 1748293 |
| 1776 BPSS1701                               | 23 | 1883409 | 1882597 | 1918077 | 1917265 | 1890119 | 1889307 | 1876251 | 1875439 | 1845537 | 1844725 | 1902383 | 1903195 | 474426 | 475238 | 1436426 | 1435614 | 1614608 | 1615420 | 1749866 | 1749054 |
| 1777 BPSS1702                               | 23 | 1884538 | 1884032 | 1919207 | 1918077 | 1891033 | 1890119 | 1877381 | 1876251 | 1846667 | 1845537 | 1901253 | 1902383 | 473296 | 474426 | 1437556 | 1436426 | 1613478 | 1614608 | 1750761 | 1750300 |
| 1778 BPSS1703                               | 23 |         |         | 1920089 | 1919367 |         |         | 1877657 | 1877541 |         |         |         |         |        |        |         |         |         |         | 1751259 | 1750921 |
| 1779 BPSS1704                               | 23 | 1887289 | 1886171 | 1922562 | 1921444 | 1894986 | 1893868 | 1879845 | 1878727 | 1849418 | 1848300 | 1898502 | 1899620 | 470545 | 471663 | 1440307 | 1439189 | 1610727 | 1611845 | 430270  | 431388  |
| 1780 BPSS1705                               | 23 | 1888698 | 1887634 | 1923971 | 1922907 | 1896395 | 1895331 | 1881254 | 1880190 | 1850827 | 1849763 | 1897093 | 1898157 | 469136 | 470200 | 1441716 | 1440652 | 1609318 | 1610382 | 428861  | 429925  |
| 1781 BPSS1706                               | 23 | 1889397 | 1888750 | 1924670 | 1924023 | 1897094 | 1896447 | 1881953 | 1881306 | 1851526 | 1850879 | 1896394 | 1897041 | 468437 | 469084 | 1442415 | 1441768 | 1608619 | 1609266 | 428162  | 428809  |
| 1782 BPSS1706a                              | 23 | 1889618 | 1889478 | 1924891 | 1924751 | 1897315 | 1897175 | 1882174 | 1882034 | 1851747 | 1851607 | 1896173 | 1896313 | 468216 | 468356 | 1442636 | 1442496 | 1608398 | 1608538 | 427941  | 428081  |
| 1783 BPSS1707                               | 23 | 1891030 | 1889624 | 1926303 | 1924897 | 1898727 | 1897321 | 1883586 | 1882180 | 1853159 | 1851753 | 1894761 | 1896167 | 466804 | 468210 | 1444048 | 1442642 | 1606986 | 1608392 | 426529  | 427935  |
| 1784 BPSS1708                               | 23 | 1892717 | 1891425 | 1927990 | 1926698 | 1900414 | 1899122 | 1885273 | 1883981 | 1854846 | 1853554 | 1893074 | 1894366 | 465117 | 466409 | 1445735 | 1444443 | 1605299 | 1606591 | 424842  | 426134  |
| 1785 BPSS1709                               | 23 | 1893387 | 1892713 | 1928660 | 1927986 | 1901084 | 1900410 | 1885943 | 1885269 | 1855516 | 1854842 | 1892404 | 1893078 | 464447 | 465121 | 1446405 | 1445731 | 1604629 | 1605303 | 424172  | 424846  |
| 1786 BPSS1710                               | 23 | 1894904 | 1894380 | 1930177 | 1929653 | 1902601 | 1902077 | 1887460 | 1886936 | 1857033 | 1856509 | 1890887 | 1891411 | 462930 | 463454 | 1447922 | 1447398 | 1603112 | 1603636 | 422655  | 423179  |
| 1787 BPSS1711                               | 23 | 1895065 | 1897785 | 1930338 | 1930742 | 1902762 | 1905482 | 1887621 | 1890341 | 1857194 | 1859914 | 1890726 | 1888006 | 462769 | 460049 | 1448083 | 1450803 | 1602951 | 1600231 | 422494  | 419774  |
| 1788 BPSS1712                               | 23 | 1899284 | 1898043 | 1935507 | 1934413 | 1906981 | 1905740 | 1891840 | 1890599 | 1861413 | 1860172 | 1886507 | 1887748 | 458550 | 459791 | 1452302 | 1451061 | 1598732 | 1599973 | 418275  | 419516  |
| 1789 BPSS1713_conserved hypothetical protei | 23 | 1901770 | 1901666 | 1937993 | 1937889 | 1909467 | 1909363 | 1892982 | 1892701 | 1862555 | 1862274 | 1884021 | 1884125 | 456064 | 456168 | 1453444 | 1453163 | 1596246 | 1596350 | 417133  | 417414  |
| 1790                                        | 23 | 1900428 | 1901663 | 1936651 | 1937886 | 1908125 | 1909360 | 1892984 | 1894219 | 1862557 | 1863793 | 1884128 | 1885363 | 456171 | 457406 | 1453446 | 1454681 | 1596353 | 1597588 | 415896  | 417131  |
| 1791 BPSS1714                               | 23 | 1901846 | 1902817 | 1938069 | 1939040 | 1909543 | 1910514 | 1894402 | 1894776 | 1863976 | 1864947 | 1883945 | 1882974 | 455988 | 455017 | 1454864 | 1455835 | 1596170 | 1595199 | 415713  | 414742  |
| 1792 BPSS1715                               | 23 | 1904218 | 1902920 | 1940441 | 1939143 | 1911915 | 1910617 | 1896535 | 1895924 | 1866348 | 1865050 | 1881573 | 1882871 | 453616 | 454914 | 1457236 | 1455938 | 1593798 | 1593096 | 413341  | 414639  |
| 1793 BPSS1716                               | 23 | 1904543 | 1904274 | 1940766 | 1940497 | 1912240 | 1911971 | 1896860 | 1896591 | 1866673 | 1866404 | 1881248 | 1881517 | 453291 | 453560 | 1457561 | 1457292 | 1593473 | 1593742 | 413016  | 413285  |
| 1794 BPSS1717                               | 23 | 1905    |         |         |         |         |         |         |         |         |         |         |         |        |        |         |         |         |         |         |         |



|      |                   |    |         |         |         |         |         |         |         |         |         |         |         |         |        |        |         |         |         |         |        |        |
|------|-------------------|----|---------|---------|---------|---------|---------|---------|---------|---------|---------|---------|---------|---------|--------|--------|---------|---------|---------|---------|--------|--------|
| 1798 | BPSS1721          | 23 | 1908837 | 1908040 | 1945060 | 1944263 | 1916534 | 1915737 | 1901154 | 1900357 | 1870967 | 1870170 | 1876954 | 1877751 | 448997 | 449794 | 1461855 | 1461058 | 1589179 | 1589976 | 408722 | 409519 |
| 1799 | BPSS1722          | 23 | 1909136 | 1910116 | 1945359 | 1946339 | 1916833 | 1917813 | 1901453 | 1902433 | 1871266 | 1872246 | 1876655 | 1875675 | 448698 | 447718 | 1462154 | 1463134 | 1588880 | 1587900 | 408423 | 407443 |
| 1800 | BPSS1723          | 23 | 1910341 | 1911333 | 1946564 | 1947556 | 1918038 | 1919030 | 1902658 | 1903650 | 1872471 | 1873463 | 1875450 | 1874458 | 447493 | 446501 | 1463359 | 1464351 | 1587675 | 1586683 | 407218 | 406226 |
| 1801 | BPSS1724          | 23 | 1911493 | 1911999 | 1947716 | 1948222 | 1919190 | 1919696 | 1903810 | 1904316 | 1873623 | 1874129 | 1874298 | 1873792 | 446341 | 445835 | 1464511 | 1465017 | 1586523 | 1586017 | 406066 | 405560 |
| 1802 | BPSS1725          | 23 | 1912079 | 1913527 | 1948302 | 1949750 | 1919776 | 1921224 | 1904396 | 1905844 | 1874209 | 1875657 | 1873712 | 1872264 | 445755 | 444307 | 1465097 | 1466545 | 1585937 | 1584489 | 405480 | 404032 |
| 1803 | BPSS1726          | 23 | 1913578 | 1916292 | 1949801 | 1952515 | 1921275 | 1923989 | 1905895 | 1908609 | 1875708 | 1878422 | 1872213 | 1869499 | 444256 | 441542 | 1466596 | 1469310 | 1584438 | 1581724 | 403981 | 401267 |
| 1804 | BPSS1727          | 23 | 1919277 | 1916545 | 1955500 | 1952768 | 1926974 | 1924242 | 1911594 | 1908862 | 1881407 | 1878675 | 1866514 | 1869246 | 438557 | 441289 | 1472295 | 1469563 | 1578739 | 1581471 | 398282 | 401014 |
| 1805 | BPSS1728          | 23 | 1921051 | 1919363 | 1957274 | 1955586 | 1928748 | 1927060 | 1913368 | 1911680 | 1883181 | 1881493 | 1864740 | 1866428 | 436783 | 438471 | 1474069 | 1472381 | 1576965 | 1578653 | 396508 | 398196 |
| 1806 | Chr2_60_IS407A_A  |    | 1921548 | 1922783 | 1957771 | 1959006 | 1929245 | 1930480 | 1913865 | 1915100 | 1883678 | 1884913 | 1863008 | 1864243 | 435051 | 436286 | 1474566 | 1475801 | 1575233 | 1576468 | 394776 | 396011 |
| 1807 | BPSS1729          |    |         |         |         |         |         |         |         |         |         |         |         |         |        |        |         |         |         |         |        |        |
| 1808 | BPSS1730          |    |         |         |         |         |         |         |         |         |         |         |         |         |        |        |         |         |         |         |        |        |
| 1809 | BPSS1731          |    |         |         |         |         |         |         |         |         |         |         |         |         |        |        |         |         |         |         |        |        |
| 1810 | BPSS1732          |    |         |         |         |         |         |         |         |         |         |         |         |         |        |        |         |         |         |         |        |        |
| 1811 | BPSS1733          |    |         |         |         |         |         |         |         |         |         |         |         |         |        |        |         |         |         |         |        |        |
| 1812 | Chr2_61_IS407A_A  |    | 432859  | 434094  | 442944  | 444179  | 472071  | 473306  | 431867  | 433102  | 387487  | 388722  | 1863008 | 1864243 | 435051 | 436286 | 1474566 | 1475801 |         |         | 394776 | 396011 |
| 1813 | BPSS1734          | 24 | 432863  | 432429  | 442948  | 442514  | 472075  | 471641  | 431871  | 431437  | 387491  | 387057  | 1863012 | 1862578 | 435055 | 434621 | 1475797 | 1476231 |         |         | 394780 | 394346 |
| 1814 | BPSS1735          | 24 | 431969  | 432328  | 441590  | 442054  | 470717  | 471181  | 430513  | 430977  | 386133  | 386597  | 1861654 | 1862118 | 433697 | 434161 | 1477155 | 1476691 |         |         | 393422 | 393886 |
| 1815 | BPSS1736          | 24 | 430206  | 431471  | 440291  | 441556  | 469418  | 470683  | 429214  | 430479  | 384834  | 386099  | 1860355 | 1861620 | 432398 | 433663 | 1478454 | 1477189 |         |         | 392123 | 393388 |
| 1816 | BPSS1737          | 24 | 429068  | 430111  | 439153  | 440196  | 468280  | 469323  | 428076  | 429119  | 383696  | 384739  | 1859217 | 1860260 | 431260 | 432303 | 1479592 | 1478549 |         |         | 390985 | 392028 |
| 1817 | BPSS1738          | 24 | 427893  | 428990  | 437978  | 439075  | 467105  | 468202  | 426901  | 427998  | 382521  | 383618  | 1858042 | 1859139 | 430085 | 431182 | 1480767 | 1479670 |         |         | 389810 | 390907 |
| 1818 | BPSS1739          | 24 | 427784  | 426258  | 437869  | 436343  | 466996  | 465470  | 426792  | 425266  | 382412  | 380886  | 1857933 | 1856407 | 429976 | 428450 | 1480876 | 1482402 |         |         | 389701 | 388175 |
| 1819 | BPSS1740          | 24 | 425119  | 426150  | 435204  | 436235  | 464331  | 465362  | 424127  | 425158  | 379747  | 380778  | 1855268 | 1856299 | 427311 | 428342 | 1483541 | 1482510 |         |         | 387036 | 388067 |
| 1820 | BPSS1741          | 24 | 425005  | 425112  | 434107  | 435090  | 463234  | 464217  | 423030  | 424013  | 378650  | 379633  | 1854171 | 1855154 | 426214 | 427197 | 1484638 | 1483655 |         |         | 385939 | 386922 |
| 1821 | BPSS1742          | 24 | 421605  | 423695  | 431690  | 433780  | 460817  | 462907  | 420613  | 422703  | 376233  | 378323  | 1851754 | 1853844 | 423797 | 425887 | 1487055 | 1484965 |         |         | 383522 | 385612 |
| 1822 | BPSS1743          | 24 | 420978  | 421370  | 431063  | 431455  | 460190  | 460582  | 419986  | 420378  | 375606  | 375998  | 1851127 | 1851519 | 423170 | 423562 | 1487682 | 1487290 |         |         | 382895 | 383287 |
| 1823 | BPSS1744          | 24 | 420281  | 420814  | 430366  | 430899  | 459493  | 460026  | 419289  | 419822  | 374909  | 375442  | 1850430 | 1850963 | 422473 | 423006 | 1488379 | 1487846 |         |         | 382198 | 382731 |
| 1824 | BPSS1745          | 24 | 420012  | 419380  | 430097  | 429465  | 459224  | 458592  | 419020  | 418388  | 374640  | 374008  | 1850161 | 1849529 | 422204 | 421572 | 1488648 | 1489280 |         |         | 381929 | 381297 |
| 1825 | BPSS1746          | 24 | 418482  | 419243  | 428637  | 429104  | 457694  | 458455  | 417490  | 418251  | 373110  | 373871  | 1848631 | 1849392 | 420674 | 421435 | 1490178 | 1489417 |         |         | 380399 | 381160 |
| 1826 | BPSS1747          | 24 | 417886  | 418200  | 428041  | 428355  | 457098  | 457412  | 416894  | 417208  | 372514  | 372828  | 1848035 | 1848349 | 420078 | 420392 | 1490774 | 1490460 |         |         | 379803 | 380117 |
| 1827 | BPSS1748          | 24 | 417109  | 417444  | 427264  | 427599  | 456321  | 456656  | 416117  | 416452  | 371737  | 372072  | 1847258 | 1847593 | 419301 | 419636 | 1491551 | 1491216 |         |         | 379026 | 379361 |
| 1828 | BPSS1749          | 24 | 415501  | 416913  | 425656  | 427068  | 454713  | 456125  | 414509  | 415921  | 370129  | 371541  | 1845650 | 1847062 | 417693 | 419105 | 1493159 | 1491747 |         |         | 377418 | 378830 |
| 1829 | BPSS1750          | 24 | 414431  | 415042  | 424586  | 425197  | 453643  | 454254  | 413439  | 414050  | 369059  | 369670  | 1844580 | 1845191 | 416623 | 417234 | 1494229 | 1493618 |         |         | 376348 | 376959 |
| 1830 | BPSS1751          | 24 | 413467  | 414402  | 423622  | 424557  | 452679  | 453614  | 412475  | 413410  | 368095  | 369030  | 1843616 | 1844551 | 415659 | 416594 | 1495193 | 1494258 |         |         | 375384 | 376319 |
| 1831 | BPSS1752          | 24 | 412046  | 413467  | 422201  | 423622  | 451258  | 452679  | 411054  | 412475  | 366674  | 368095  | 1842195 | 1843616 | 414238 | 415659 | 1496614 | 1495193 |         |         | 373963 | 375384 |
| 1832 | BPSS1753          | 24 | 411409  | 410552  | 421564  | 420707  | 450621  | 449764  | 410417  | 409560  | 366037  | 365180  | 1841558 | 1840701 | 413601 | 412744 | 1497251 | 1498108 |         |         | 373326 | 372469 |
| 1833 | BPSS1754          | 24 | 410485  | 409943  | 420640  | 420098  | 449697  | 449155  | 409493  | 408951  | 365113  | 364571  | 1840634 | 1840092 | 412677 | 412135 | 1498175 | 1498717 |         |         | 372402 | 371860 |
| 1834 | Chr2_62a_IS407A_A |    | 408708  | 409943  | 418863  | 420098  | 447920  | 449155  | 407716  | 408951  | 363336  | 364571  | 1838857 | 1840092 | 410900 | 412135 | 1498717 | 1499952 |         |         | 370625 | 371860 |
| 1835 | Chr2_62b_IS407A_A |    | 329696  | 330729  | 339193  | 340226  | 367812  | 368845  | 328902  | 329935  | 284510  | 285543  | 1759985 | 1761018 | 332069 | 333102 | 1577349 | 1578382 | 1496137 | 1497372 | 292289 | 293524 |
| 1836 | Chr2_63_IS8ma2_B  |    |         |         |         |         |         |         |         |         |         |         |         |         |        |        |         |         | 1493768 | 1495340 | 289920 | 291492 |
| 1837 | BPSS1755          | 25 | 327125  | 329164  | 336622  | 338661  | 365241  | 367280  | 326331  | 328370  | 281939  | 283978  | 1757414 | 1759453 | 329498 | 331537 | 1580953 | 1578914 | 1491340 | 1493379 | 287492 | 289531 |
| 1838 | BPSS1756          | 25 | 324807  | 326678  | 334304  | 336175  | 362923  | 364794  | 324013  | 325884  | 279621  | 281492  | 1755096 | 1756967 | 327180 | 329051 | 1583271 | 1581400 | 1489022 | 1490893 | 285174 | 287045 |
| 1839 | BPSS1757          | 25 | 324266  | 324709  | 333763  | 334206  | 362382  | 362825  | 323472  | 323915  | 279080  | 279523  | 1754555 | 1754998 | 326639 | 327082 | 1583812 | 1583369 | 1488481 | 1488924 | 284633 | 285076 |
| 1840 | BPSS1758          | 25 | 323887  | 324096  | 333384  | 333593  | 362003  | 362212  | 323093  | 323302  | 278701  | 278910  | 1754178 | 1754294 | 326260 | 326469 | 1584191 | 1583982 | 1488102 | 1488311 | 284254 | 284463 |
| 1841 | BPSS1759          | 25 | 322584  | 323804  | 332081  | 333301  | 360700  | 361920  | 321790  | 323010  | 277398  | 278618  | 1752875 | 1754095 | 324957 | 326177 | 1585494 | 1584274 | 1486799 | 1488019 | 282951 | 284171 |
| 1842 | BPSS1760          | 25 | 322444  | 321407  | 331941  | 330904  | 360560  | 359523  | 321650  | 320613  | 277258  | 276221  | 1752735 | 1751698 | 324817 | 323780 | 1585634 | 1586671 | 1486659 | 1485622 | 282811 | 281774 |
| 1843 | Chr2_64_IS8ma2_B  |    | 319482  | 321054  | 328979  | 330551  | 357598  | 359170  | 318688  | 320260  | 274296  | 275868  |         |         |        |        |         |         |         |         |        |        |
| 1844 | BPSS1761          | 25 | 318608  | 319414  | 328105  | 328911  | 356724  | 357530  | 317814  | 318620  | 273422  | 274228  | 1750495 | 1751301 | 322577 | 323383 | 1587874 | 1587068 | 1484419 | 1485225 | 280571 | 281377 |
| 1845 | BPSS1762          | 25 | 316553  | 318454  | 326050  | 327951  | 354669  | 356570  | 315759  | 317660  | 271367  | 273268  | 1748440 | 1750341 | 320522 | 322423 | 1589929 | 1588028 | 1482364 | 1484265 | 278516 | 280417 |
| 1846 | BPSS1763          | 25 | 315585  | 316466  | 325082  | 325963  | 353701  | 354582  | 314791  | 315672  | 270399  | 271280  | 1747472 | 1748353 | 319554 | 320435 | 1590897 | 1590016 | 1481396 | 1482277 | 277548 | 278429 |
| 1847 | BPSS1764          | 25 | 315295  | 315585  | 324792  | 325082  | 353411  | 353701  | 314501  | 314791  | 270109  | 270399  | 1747182 | 1747472 | 319264 | 319554 | 1591187 | 1590897 | 1481106 | 1481396 | 277258 | 277548 |
| 1848 | BPSS1765          | 25 | 315031  | 313922  | 324528  | 323419  | 353147  | 352038  | 314237  | 313128  | 269845  | 268736  | 1746918 | 1745809 | 319000 | 317891 | 1591451 | 1592560 | 1480842 | 1479733 | 276994 | 275885 |



|      |                  |        |        |        |        |        |        |        |        |        |        |         |         |         |        |        |  |         |         |         |        |        |
|------|------------------|--------|--------|--------|--------|--------|--------|--------|--------|--------|--------|---------|---------|---------|--------|--------|--|---------|---------|---------|--------|--------|
| 1900 | BPSS1813         |        |        |        |        |        |        |        |        |        |        |         |         |         |        |        |  |         |         |         |        |        |
| 1901 | BPSS1814         |        |        |        |        |        |        |        |        |        |        |         |         |         |        |        |  |         |         |         |        |        |
| 1902 | BPSS1815         |        |        |        |        |        |        |        |        |        |        |         |         |         |        |        |  |         |         |         |        |        |
| 1903 | BPSS1816         |        |        |        |        |        |        |        |        |        |        |         |         |         |        |        |  |         |         |         |        |        |
| 1904 | BPSS1817         |        |        |        |        |        |        |        |        |        |        |         |         |         |        |        |  |         |         |         |        |        |
| 1905 | BPSS1818         |        |        |        |        |        |        |        |        |        |        |         |         |         |        |        |  |         |         |         |        |        |
| 1906 | BPSS1819         |        |        |        |        |        |        |        |        |        |        |         |         |         |        |        |  |         |         |         |        |        |
| 1907 | BPSS1820         |        |        |        |        |        |        |        |        |        |        |         |         |         |        |        |  |         |         |         |        |        |
| 1908 | BPSS1821         |        |        |        |        |        |        |        |        |        |        |         |         |         |        |        |  |         |         |         |        |        |
| 1909 | BPSS1822         |        |        |        |        |        |        |        |        |        |        |         |         |         |        |        |  |         |         |         |        |        |
| 1910 | BPSS1823         |        |        |        |        |        |        |        |        |        |        |         |         |         |        |        |  |         |         |         |        |        |
| 1911 | BPSS1824         |        |        |        |        |        |        |        |        |        |        |         |         |         |        |        |  |         |         |         |        |        |
| 1912 | BPSS1825         |        |        |        |        |        |        |        |        |        |        |         |         |         |        |        |  |         |         |         |        |        |
| 1913 | BPSS1826         |        |        |        |        |        |        |        |        |        |        |         |         |         |        |        |  |         |         |         |        |        |
| 1914 | BPSS1827         |        |        |        |        |        |        |        |        |        |        |         |         |         |        |        |  |         |         |         |        |        |
| 1915 | BPSS1828         |        |        |        |        |        |        |        |        |        |        |         |         |         |        |        |  |         |         |         |        |        |
| 1916 | BPSS1829         |        |        |        |        |        |        |        |        |        |        |         |         |         |        |        |  |         |         |         |        |        |
| 1917 | BPSS1830         |        |        |        |        |        |        |        |        |        |        |         |         |         |        |        |  |         |         |         |        |        |
| 1918 | BPSS1831         |        |        |        |        |        |        |        |        |        |        |         |         |         |        |        |  |         |         |         |        |        |
| 1919 | BPSS1832         |        |        |        |        |        |        |        |        |        |        |         |         |         |        |        |  |         |         |         |        |        |
| 1920 | BPSS1833         |        |        |        |        |        |        |        |        |        |        |         |         |         |        |        |  |         |         |         |        |        |
| 1921 | Chr2_68_IS407A_A | 268389 | 269624 | 277886 | 279121 | 306238 | 307473 | 267595 | 268830 | 223244 | 224479 | 1697435 | 1698670 | 269548  | 270783 |        |  | 1432613 | 1433848 | 228919  | 230154 |        |
| 1922 | BPSS1834         | 25     | 267312 | 268388 | 276809 | 277885 | 305161 | 306237 | 266518 | 267594 | 222167 | 223243  | 1696358 | 1697434 | 268471 | 269547 |  |         | 1431536 | 1432612 | 227842 | 228918 |
| 1923 | BPSS1835         | 25     | 266856 | 265390 | 276353 | 274887 | 304705 | 303239 | 266062 | 264596 | 221711 | 220245  | 1695902 | 1694436 | 268015 | 266549 |  |         | 1431080 | 1429614 | 227386 | 225920 |
| 1924 | BPSS1836         | 25     | 264310 | 265311 | 273807 | 274808 | 302159 | 303160 | 263516 | 264517 | 219165 | 220166  | 1693356 | 1694357 | 265469 | 266470 |  |         | 1428534 | 1429535 | 224840 | 225841 |
| 1925 | BPSS1837         | 25     | 263176 | 263730 | 272673 | 273227 | 301025 | 301579 | 262382 | 262936 | 218031 | 218585  | 1692222 | 1692776 | 264335 | 264889 |  |         | 1427400 | 1427954 | 223706 | 224260 |
| 1926 | BPSS1838         | 25     | 261789 | 263123 | 271286 | 272620 | 299638 | 300972 | 260995 | 262329 | 216644 | 217978  | 1690835 | 1692169 | 262948 | 264282 |  |         | 1426013 | 1427347 | 222319 | 223653 |
| 1927 | BPSS1839         | 25     | 261255 | 261674 | 270751 | 271170 | 299104 | 299523 | 260461 | 260880 | 216110 | 216529  | 1690301 | 1690720 | 262414 | 262833 |  |         | 1425479 | 1425898 | 221785 | 222204 |
| 1928 | BPSS1840         | 25     | 259944 | 260981 | 269440 | 270477 | 297793 | 298830 | 259150 | 260187 | 214799 | 215836  | 1688990 | 1690027 | 261103 | 262140 |  |         | 1424168 | 1425205 | 220474 | 221511 |
| 1929 | BPSS1841         | 25     | 258131 | 259396 | 267627 | 268892 | 295980 | 297245 | 257337 | 258602 | 212986 | 214251  | 1687177 | 1688442 | 259290 | 260555 |  |         | 1422355 | 1423620 | 218661 | 219926 |
| 1930 | BPSS1842         | 25     | 257595 | 258131 | 267091 | 267627 | 295444 | 295980 | 256801 | 257337 | 212450 | 212986  | 1686641 | 1687177 | 258754 | 259290 |  |         | 1421819 | 1422355 | 218125 | 218661 |
| 1931 | BPSS1843         | 25     | 257160 | 257570 | 266656 | 267066 | 295009 | 295419 | 256366 | 256776 | 212015 | 212425  | 1686206 | 1686616 | 258319 | 258729 |  |         | 1421384 | 1421794 | 217690 | 218100 |
| 1932 | BPSS1844         | 25     | 256640 | 256990 | 266136 | 266486 | 294489 | 294839 | 255846 | 256196 | 211495 | 211845  | 1685686 | 1686036 | 257799 | 258149 |  |         | 1420864 | 1421214 | 217171 | 217326 |
| 1933 | BPSS1845         | 25     | 256279 | 254408 | 265775 | 263904 | 294128 | 292257 | 255485 | 253614 | 211134 | 209263  | 1685325 | 1683454 | 257438 | 255567 |  |         | 1420503 | 1418632 | 216810 | 215146 |
| 1934 | BPSS1846         | 25     | 253627 | 253250 | 263123 | 262746 | 291476 | 291099 | 252833 | 252456 | 208482 | 208105  | 1682673 | 1682296 | 254786 | 254409 |  |         | 1417851 | 1417474 | 214666 | 214289 |
| 1935 | BPSS1847         | 25     | 253198 | 252617 | 262694 | 262113 | 291047 | 290466 | 252404 | 251823 | 208053 | 207472  | 1682244 | 1681663 | 254357 | 253776 |  |         | 1417422 | 1416841 | 214237 | 213656 |
| 1936 | BPSS1848         | 25     | 252422 | 251331 | 261918 | 260827 | 290271 | 289180 | 251628 | 250537 | 207277 | 206186  | 1681468 | 1680377 | 253581 | 252490 |  |         | 1416646 | 1415555 | 213461 | 212370 |
| 1937 | BPSS1849         | 25     | 250636 | 251109 | 260132 | 260605 | 288485 | 288958 | 249842 | 250315 | 205491 | 205964  | 1679682 | 1680155 | 251795 | 252268 |  |         | 1414860 | 1415333 | 211675 | 212148 |
| 1938 | BPSS1850         | 25     | 248417 | 250510 | 257913 | 260006 | 286266 | 288359 | 247623 | 249716 | 203272 | 205365  | 1677463 | 1679556 | 249576 | 251669 |  |         | 1412641 | 1414734 | 209456 | 211549 |
| 1939 | BPSS1851         | 25     | 247950 | 246748 | 257446 | 256244 | 285799 | 284597 | 247156 | 245954 | 202805 | 201603  | 1676996 | 1675794 | 249109 | 247907 |  |         | 1412174 | 1410972 | 208989 | 207787 |
| 1940 | BPSS1852         | 25     | 245081 | 246094 | 254577 | 255590 | 282930 | 283943 | 244287 | 245300 | 199936 | 200949  | 1674136 | 1675149 | 246240 | 247253 |  |         | 1409296 | 1410309 | 206111 | 207124 |
| 1941 | BPSS1853         | 25     | 243894 | 244688 | 253390 | 254184 | 281743 | 282537 | 243100 | 243894 | 198791 | 199585  | 1672879 | 1673673 | 245032 | 245826 |  |         | 1408165 | 1408959 | 204924 | 205718 |
| 1942 | BPSS1854         | 25     | 242902 | 243669 | 252398 | 253165 | 280751 | 281518 | 242108 | 242875 | 197799 | 198566  | 1671887 | 1672654 | 244040 | 244807 |  |         | 1407173 | 1407940 | 203932 | 204699 |
| 1943 | BPSS1855         | 25     | 242179 | 242865 | 251675 | 252361 | 280028 | 280714 | 241385 | 242071 | 197076 | 197762  | 1671164 | 1671850 | 243317 | 244003 |  |         | 1406450 | 1407136 | 203209 | 203895 |
| 1944 | BPSS1856         | 25     | 241106 | 242179 | 250602 | 251675 | 278955 | 280028 | 240312 | 241385 | 196003 | 197076  | 1670091 | 1671164 | 242244 | 243317 |  |         | 1405377 | 1406450 | 202136 | 203209 |
| 1945 | BPSS1857         | 25     | 239877 | 241106 | 249373 | 250602 | 277726 | 278955 | 239083 | 240312 | 194774 | 196003  | 1668862 | 1670091 | 241015 | 242244 |  |         | 1404148 | 1405377 | 200907 | 202136 |
| 1946 | BPSS1858         | 25     | 239479 | 238556 | 248968 | 248045 | 277328 | 276405 | 238685 | 237762 | 194306 | 193383  | 1668513 | 1667590 | 240624 | 239701 |  |         | 1403666 | 1402743 | 200530 | 199607 |
| 1947 | BPSS1859         | 25     | 238461 | 238063 | 247950 | 247552 | 276310 | 275912 | 237667 | 237269 | 193288 | 192890  | 1667495 | 1667109 | 239606 | 239220 |  |         | 1402648 | 1402250 | 199512 | 199114 |
| 1948 | BPSS1860         | 25     | 236733 | 237917 | 246222 | 247406 | 274582 | 275766 | 235939 | 237123 | 191560 | 192744  | 1665779 | 1666963 | 237890 | 239074 |  |         | 1400920 | 1402104 | 197784 | 198968 |
| 1949 | BPSS1861         | 25     | 234959 | 235837 | 244448 | 245326 | 272808 | 273686 | 234165 | 235043 | 189786 | 190664  | 1664005 | 1664883 | 236116 | 236994 |  |         | 1399146 | 1400024 | 196010 | 196888 |
| 1950 | BPSS1862         | 25     | 234268 | 232262 | 243757 | 241751 | 272117 | 270111 | 233474 | 231468 | 189095 | 187089  | 1663314 | 1661308 | 235425 | 233419 |  |         | 1398455 | 1396449 | 195319 | 193313 |

|               |    |        |        |         |        |        |        |        |        |        |        |         |         |        |        |         |         |         |         |        |        |
|---------------|----|--------|--------|---------|--------|--------|--------|--------|--------|--------|--------|---------|---------|--------|--------|---------|---------|---------|---------|--------|--------|
| 1951 BPSS1863 | 25 | 231192 | 231917 | 240681  | 241406 | 269041 | 269766 | 230398 | 231123 | 186019 | 186744 | 1660238 | 1660963 | 232349 | 233074 | 1395379 | 1396104 | 192243  | 192968  |        |        |
| 1952 BPSS1864 | 25 | 231113 | 230076 | 240602  | 239565 | 268962 | 267925 | 230319 | 229282 | 185940 | 184903 | 1660159 | 1659122 | 232270 | 231233 | 1395300 | 1394263 | 192164  | 191127  |        |        |
| 1953 BPSS1865 | 25 | 229619 | 228582 | 239108  | 238071 | 267468 | 266431 | 228825 | 227788 | 184446 | 183409 | 1658677 | 1657640 | 230788 | 229751 | 1393812 | 1392775 | 190670  | 189633  |        |        |
| 1954 BPSS1866 | 25 | 228095 | 227442 | 237584  | 236931 | 265944 | 265291 | 227301 | 226648 | 182908 | 182255 | 1657153 | 1656500 | 229257 | 228604 | 1392281 | 1391628 | 189132  | 188479  |        |        |
| 1955 BPSS1867 | 25 | 226589 | 225648 | 236078  | 235137 | 264438 | 263497 | 225795 | 224854 | 181402 | 180461 | 1655647 | 1654706 | 227751 | 226810 | 1390775 | 1389834 | 187626  | 186685  |        |        |
| 1956 BPSS1868 | 25 | 224159 | 225439 | 233648  | 234928 | 262008 | 263288 | 223546 | 224277 | 178972 | 180252 | 1653217 | 1654497 | 225231 | 226601 | 1388345 | 1389265 | 185196  | 186476  |        |        |
| 1957 BPSS1869 | 25 | 222748 | 223806 | 232237  | 233295 | 260597 | 261655 | 222135 | 223193 | 177561 | 178619 | 1651806 | 1652864 | 223910 | 224968 | 1386934 | 1387992 | 183785  | 184843  |        |        |
| 1958 BPSS1870 | 25 | 221668 | 222693 | 231157  | 232182 | 259517 | 260542 | 221055 | 222080 | 176481 | 177506 | 1650726 | 1651751 | 222830 | 223855 | 1385854 | 1386879 | 182705  | 183730  |        |        |
| 1959 BPSS1871 | 25 | 219067 | 221658 | 228556  | 231147 | 256662 | 257168 | 218454 | 221045 | 173880 | 176471 | 1648125 | 1650716 | 220229 | 222820 | 1383253 | 1385844 | 180104  | 182695  |        |        |
| 1960 BPSS1872 | 25 | 218336 | 219067 | 227825  | 228556 | 255931 | 256662 | 217723 | 218454 | 173149 | 173880 | 1647394 | 1648125 | 219498 | 220229 | 1382522 | 1383253 | 179373  | 180104  |        |        |
| 1961 BPSS1873 | 25 | 216301 | 218352 | 225790  | 227841 | 253373 | 254386 | 217114 | 217316 | 171114 | 173165 | 1645359 | 1647410 | 217463 | 219514 | 1380487 | 1382538 | 177868  | 178764  |        |        |
| 1962 BPSS1874 | 25 | 215762 | 216301 | 225251  | 225790 | 252834 | 253373 | 215455 | 215994 | 170575 | 171114 | 1644820 | 1645359 | 216924 | 217463 | 1379948 | 1380487 | 177329  | 177868  |        |        |
| 1963 BPSS1875 | 25 | 214075 | 215748 | 223564  | 225237 | 251147 | 252820 | 213768 | 215441 | 168888 | 170561 | 1643133 | 1644806 | 215237 | 216910 | 1378261 | 1379934 | 175642  | 177315  |        |        |
| 1964 BPSS1876 | 25 | 212807 | 213901 | 222296  | 223390 | 249879 | 250973 | 212500 | 213594 | 167620 | 168714 | 1641865 | 1642959 | 213969 | 215063 | 1376993 | 1378087 | 174374  | 175468  |        |        |
| 1965 BPSS1877 | 25 | 211991 | 211659 | 221480  | 221148 | 249063 | 248731 | 211684 | 211352 | 166804 | 166472 | 1641049 | 1640717 | 213153 | 212821 | 1376177 | 1375845 | 173558  | 173226  |        |        |
| 1966 BPSS1878 | 25 | 209943 | 211373 | 219432  | 220862 | 247015 | 248445 | 209636 | 211066 | 164756 | 166186 | 1639001 | 1640431 | 211105 | 212535 | 1374129 | 1375559 | 171510  | 172940  |        |        |
| 1967 BPSS1879 | 25 | 208211 | 209848 | 217700  | 219337 | 245283 | 246920 | 207904 | 209541 | 163024 | 164661 | 1637269 | 1638906 | 209373 | 211010 | 1372397 | 1374034 | 169778  | 171415  |        |        |
| 1968 BPSS1880 | 25 | 206284 | 207900 | 215773  | 217389 | 243356 | 244972 | 205977 | 207593 | 161097 | 162713 | 1635342 | 1636958 | 207446 | 209062 | 1370740 | 1372086 | 167851  | 169467  |        |        |
| 1969 BPSS1881 | 25 | 205521 | 206120 | 214325  | 215047 | 241908 | 242630 | 204529 | 205251 | 159649 | 160371 | 1633894 | 1634616 | 205998 | 206720 | 1369022 | 1375946 | 166403  | 167125  |        |        |
| 1970 BPSS1882 | 25 | 204371 | 204532 | 213860  | 214021 | 241443 | 241604 | 204064 | 204225 | 159184 | 159345 | 1633429 | 1633590 | 205533 | 205694 | 1368557 | 1368718 | 165938  | 166099  |        |        |
| 1971 BPSS1883 | 25 | 204095 | 202446 | 213584  | 212919 | 241167 | 239518 | 203788 | 202139 | 158908 | 157259 | 1633153 | 1631504 | 205257 | 203608 | 1368281 | 1366632 | 165662  | 164013  |        |        |
| 1972 BPSS1884 | 25 | 201957 | 202373 | 211457  | 211873 | 239029 | 239445 | 201650 | 202066 | 156770 | 157186 | 1631015 | 1631431 | 203119 | 203535 | 1366143 | 1366559 | 163524  | 163940  |        |        |
| 1973 BPSS1885 | 25 | 200514 | 201752 | 2110014 | 211252 | 237586 | 238824 | 200207 | 201445 | 155327 | 156565 | 1629572 | 1630810 | 201676 | 202914 | 1364700 | 1365938 | 162081  | 163319  |        |        |
| 1974 BPSS1886 | 25 | 200198 | 200524 | 209698  | 210024 | 237270 | 237596 | 199891 | 200217 | 155011 | 155337 | 1629256 | 1629582 | 201360 | 201686 | 1364384 | 1364710 | 161765  | 162091  |        |        |
| 1975 BPSS1887 | 25 | 199661 | 200173 | 209161  | 209673 | 236733 | 237245 | 199354 | 199866 | 154474 | 154986 | 1628719 | 1629231 | 200823 | 201335 | 1363847 | 1364359 | 161228  | 161740  |        |        |
| 1976 BPSS1888 | 25 | 198408 | 199661 | 207908  | 209161 | 235480 | 236733 | 198101 | 199354 | 153221 | 154474 | 1627466 | 1628719 | 199570 | 200823 | 1362594 | 1363847 | 159975  | 161228  |        |        |
| 1977 BPSS1889 | 25 | 198208 | 197171 | 207708  | 206671 | 235280 | 234243 | 197901 | 196864 | 153021 | 151984 | 1627266 | 1626229 | 199370 | 198333 | 1362394 | 1361357 | 159775  | 158738  |        |        |
| 1978 BPSS1890 | 25 | 196231 | 197115 | 205731  | 206615 | 233303 | 234187 | 195924 | 196808 | 151044 | 151928 | 1625289 | 1626173 | 197393 | 198277 | 1360417 | 1361301 | 157798  | 158682  |        |        |
| 1979 BPSS1891 | 25 | 196141 | 195011 | 205641  | 204511 | 233213 | 232083 | 195834 | 194704 | 150954 | 149824 | 1625199 | 1624069 | 197303 | 196173 | 1360327 | 1359197 | 157708  | 156578  |        |        |
| 1980 BPSS1892 | 25 | 194973 | 194074 | 204473  | 203574 | 232045 | 231146 | 194666 | 193767 | 149786 | 148887 | 1624031 | 1623132 | 196135 | 195236 | 1359159 | 1358260 | 156540  | 155641  |        |        |
| 1981 BPSS1893 | 25 | 194033 | 193746 | 203533  | 203246 | 231105 | 230818 | 193726 | 193439 | 148846 | 148559 | 1623091 | 1622804 | 195195 | 194908 | 1358219 | 1357932 | 155600  | 155313  |        |        |
| 1982 BPSS1894 | 25 | 193291 | 193620 | 202791  | 203120 | 230363 | 230692 | 192984 | 193313 | 148104 | 148433 | 1622349 | 1622678 | 194453 | 194782 | 1357477 | 1357806 | 154858  | 155187  |        |        |
| 1983 BPSS1895 | 25 | 192697 | 193287 | 202197  | 202787 | 229769 | 230359 | 192390 | 192980 | 147510 | 148100 | 1621755 | 1622345 | 193859 | 194449 | 1356883 | 1357473 | 154264  | 154854  |        |        |
| 1984 BPSS1896 | 25 | 190676 | 192679 | 200176  | 202179 | 227748 | 229751 | 190369 | 192372 | 145489 | 147492 | 1619734 | 1621737 | 191838 | 193841 | 1354862 | 1356865 | 152243  | 152426  |        |        |
| 1985 BPSS1897 | 25 | 189786 | 190670 | 199286  | 200170 | 226858 | 227742 | 189479 | 190363 | 144599 | 145483 | 1618844 | 1619728 | 190948 | 191832 | 1353972 | 1354856 | 151353  | 152237  |        |        |
| 1986 BPSS1898 | 25 | 187028 | 189058 | 196528  | 198558 | 224100 | 226130 | 186721 | 188751 | 141841 | 143871 | 1616086 | 1618116 | 188190 | 190220 | 1351214 | 1353244 | 148595  | 150625  |        |        |
| 1987 BPSS1899 | 25 | 186878 | 185829 | 196378  | 195329 | 223950 | 222901 | 186571 | 185522 | 141691 | 140642 | 1615936 | 1614887 | 188040 | 186991 | 1351064 | 1350015 | 148445  | 147396  |        |        |
| 1988 BPSS1900 | 25 | 184925 | 185869 | 194425  | 195369 | 221997 | 222941 | 184618 | 185562 | 139738 | 140682 | 1613983 | 1614927 | 186087 | 187031 | 1349111 | 1350055 | 146492  | 147436  |        |        |
| 1989 BPSS1901 | 25 | 184830 | 183835 | 194330  | 193335 | 221902 | 220907 | 184523 | 183528 | 139643 | 138648 | 1613888 | 1612893 | 185992 | 184997 | 1349016 | 1348021 | 146397  | 145402  |        |        |
| 1990 BPSS1902 | 25 | 182740 | 183651 | 192240  | 193151 | 219812 | 220723 | 182433 | 183344 | 137553 | 138464 | 1611798 | 1612709 | 183902 | 184813 | 1346926 | 1347837 | 144307  | 145218  |        |        |
| 1991 BPSS1903 | 25 | 182516 | 181152 | 192016  | 190652 | 219588 | 218224 | 182209 | 180845 | 137329 | 135965 | 1611574 | 1610210 | 183678 | 182314 | 1346702 | 1345338 | 144083  | 142719  |        |        |
| 1992 BPSS1904 | 25 | 181152 | 180664 | 190652  | 190164 | 218224 | 217736 | 180845 | 180357 | 135965 | 135477 | 1610210 | 1609722 | 182314 | 181826 | 1345338 | 1344850 | 142719  | 142231  |        |        |
| 1993 BPSS1905 | 25 | 180617 | 179601 | 190117  | 189101 | 217689 | 216673 | 180310 | 179294 | 135430 | 134414 | 1609675 | 1608659 | 181779 | 180763 | 1344803 | 1343787 | 142184  | 141168  |        |        |
| 1994 BPSS1906 | 25 | 179601 | 178810 | 189101  | 188310 | 216673 | 215882 | 179294 | 178503 | 134414 | 133623 | 1608659 | 1607868 | 180763 | 179972 | 1343787 | 1342996 | 141168  | 140377  |        |        |
| 1995 BPSS1907 | 25 | 177885 | 178760 | 187385  | 188260 | 214957 | 215832 | 177578 | 178453 | 132698 | 133573 | 1606943 | 1607818 | 179047 | 179922 | 1342071 | 1342946 | 139452  | 140327  |        |        |
| 1996 BPSS1908 | 25 | 177482 | 177000 | 186982  | 186500 | 214554 | 214072 | 177175 | 176693 | 132295 | 131813 | 1606540 | 1606058 | 178644 | 178162 | 1341668 | 1341186 | 139049  | 138567  |        |        |
| 1997 BPSS1909 | 25 | 177000 | 176431 | 186500  | 185931 | 214072 | 213503 | 176693 | 176124 | 131813 | 131244 | 1606058 | 1605489 | 178162 | 177593 | 1341186 | 1340617 | 138567  | 137998  |        |        |
| 1998 BPSS1910 | 25 | 176405 | 175356 | 185905  | 184856 | 213477 | 212428 | 176098 | 175049 | 131218 | 130169 | 1605463 | 1604414 | 177567 | 176518 | 1340591 | 1339542 | 137972  | 137451  |        |        |
| 1999 BPSS1911 | 25 | 174726 | 173245 | 184226  | 182745 | 211798 | 210317 | 174419 | 172938 | 129539 | 128058 | 1603784 | 1602303 | 175888 | 174407 | 1338912 | 1337431 | 136297  | 134816  |        |        |
| 2000 BPSS1912 | 25 | 171828 | 173071 | 181328  | 182571 | 208900 | 210143 | 171521 | 172764 | 126655 | 127898 | 1600893 | 1602136 | 172990 | 174233 | 1336007 | 1337250 | 133392  | 134635  |        |        |
| 2001          |    | 170594 | 171829 | 180094  | 181329 | 207666 | 208901 | 170287 | 171522 | 125421 | 126656 | 1599659 | 1600894 | 171756 | 172991 | 1608602 | 1609837 | 1334773 | 1336008 | 132158 | 133393 |

|      |          |                    |    |        |        |        |        |        |        |        |        |         |         |        |        |         |         |         |         |
|------|----------|--------------------|----|--------|--------|--------|--------|--------|--------|--------|--------|---------|---------|--------|--------|---------|---------|---------|---------|
| 2002 | BPSS1912 | Chr2_69-1_ISBma1_A | 26 | 170527 | 170594 | 180027 | 180094 | 207599 | 207666 | 170220 | 170747 | 125354  | 125421  | 171689 | 171756 | 1609838 | 1609906 | 1334706 | 1334773 |
| 2003 | BPSS1913 |                    | 26 | 168879 | 170438 | 178379 | 179938 | 205951 | 207510 | 168572 | 170131 | 123706  | 125265  | 170041 | 171600 | 1611552 | 1609993 | 1333058 | 1334617 |
| 2004 |          | Chr2_71a_ISBma2_A  | 26 |        |        |        |        |        |        |        |        | 121539  | 123111  |        |        |         |         |         |         |
| 2005 |          | Chr2_71b_ISBma2_A  | 26 | 166712 | 168284 | 176212 | 177784 | 203784 | 205356 | 166405 | 167977 | 2229185 | 2230757 | 167874 | 169446 | 1612147 | 1613720 | 1330891 | 1332463 |
| 2006 | BPSS1914 |                    | 26 | 165754 | 166641 | 175254 | 176141 | 202826 | 203713 | 165447 | 166334 | 2231715 | 2230828 | 166916 | 167803 | 1614678 | 1613791 | 1329933 | 1330820 |
| 2007 | BPSS1915 |                    | 26 | 165040 | 163664 | 174540 | 173164 | 202112 | 200736 | 164733 | 163357 | 2232429 | 2233805 | 166202 | 164826 | 1615392 | 1616768 | 1329219 | 1327843 |
| 2008 | BPSS1916 |                    | 26 | 162321 | 163064 | 171821 | 172564 | 199393 | 200136 | 162014 | 162757 | 2235148 | 2234405 | 163483 | 164226 | 1618111 | 1617368 | 1326500 | 1327243 |
| 2009 | BPSS1917 |                    | 26 | 161656 | 160877 | 171156 | 170377 | 198728 | 197949 | 161349 | 160570 | 2235813 | 2236592 | 162818 | 162039 | 1618776 | 1619555 | 1325835 | 1325056 |
| 2010 | BPSS1918 |                    | 26 | 159682 | 160665 | 169182 | 170165 | 196754 | 197737 | 159375 | 160358 | 2237787 | 2236804 | 160844 | 161827 | 1620750 | 1619767 | 1323861 | 1324844 |
| 2011 | BPSS1919 |                    | 26 | 159455 | 159679 | 168955 | 169179 | 196527 | 196751 | 159148 | 159372 | 2238014 | 2237790 | 160617 | 160841 | 1620977 | 1620753 | 1323634 | 1323858 |
| 2012 | BPSS1920 |                    | 26 | 158696 | 158271 | 168196 | 167771 | 195768 | 195343 | 158389 | 157964 | 2238766 | 2239191 | 159851 | 159426 | 1621743 | 1622168 | 1322875 | 1322450 |
| 2013 | BPSS1921 |                    | 26 | 157559 | 157879 | 167059 | 167379 | 194631 | 194951 | 157252 | 157572 | 2239903 | 2239583 | 158714 | 159034 | 1622880 | 1622560 | 1321738 | 1322058 |
| 2014 | BPSS1922 |                    | 26 | 157198 | 156323 | 166698 | 165823 | 194270 | 193395 | 156891 | 156016 | 2240264 | 2241139 | 158353 | 157478 | 1623241 | 1624116 | 1321377 | 1320502 |
| 2015 | BPSS1923 |                    | 26 | 155993 | 155607 | 165493 | 165107 | 193065 | 192679 | 155686 | 155300 | 2241469 | 2241855 | 157148 | 156762 | 1624446 | 1624832 | 1320172 | 1319786 |
| 2016 | BPSS1924 |                    | 26 | 154352 | 154999 | 163852 | 164499 | 165407 | 166054 | 154237 | 154863 | 2243116 | 2242463 | 155507 | 156154 | 1626087 | 1625440 | 1318531 | 1319178 |
| 2017 | BPSS1925 |                    | 26 | 152859 | 154010 | 162359 | 163510 | 163914 | 165065 | 152744 | 153895 | 2244631 | 2243480 | 154007 | 155158 | 1627594 | 1626443 | 1316996 | 1318147 |
| 2018 | BPSS1926 |                    | 26 | 151917 | 152558 | 161417 | 162058 | 162972 | 163613 | 151802 | 152443 | 2245573 | 2244932 | 153065 | 153706 | 1628536 | 1627895 | 1316054 | 1316695 |
| 2019 | BPSS1927 |                    | 26 | 149976 | 151673 | 159476 | 161173 | 161031 | 162728 | 149861 | 151558 | 2247514 | 2245817 | 151124 | 152821 | 1630477 | 1628780 | 1314113 | 1315810 |
| 2020 | BPSS1928 |                    | 26 | 149085 | 148147 | 158585 | 157647 | 160140 | 159202 | 148970 | 148032 | 2248405 | 2249343 | 150233 | 149295 | 1631368 | 1632306 | 1313222 | 1312284 |
| 2021 | BPSS1929 |                    | 26 | 146641 | 147951 | 156141 | 157451 | 157696 | 159006 | 146526 | 147836 | 2250849 | 2249539 | 147789 | 149099 | 1633812 | 1632502 | 1310778 | 1312088 |
| 2022 | BPSS1930 |                    | 26 | 145578 | 146660 | 155078 | 156160 | 156633 | 157715 | 145463 | 146545 | 2251912 | 2250830 | 146726 | 147808 | 1634875 | 1633793 | 1309715 | 1310797 |
| 2023 | BPSS1931 |                    | 26 | 144883 | 145578 | 154383 | 155078 | 155938 | 156633 | 144768 | 145463 | 2252607 | 2251912 | 146031 | 146726 | 1635570 | 1634875 | 1309020 | 1309715 |
| 2024 | BPSS1932 |                    | 26 | 143744 | 144877 | 153244 | 154377 | 154799 | 155932 | 143629 | 144762 | 2253746 | 2252613 | 144892 | 146025 | 1636709 | 1635576 | 1307881 | 1309014 |
| 2025 | BPSS1933 |                    | 26 | 143496 | 143744 | 152996 | 153244 | 154551 | 154799 | 143381 | 143629 | 2253994 | 2253746 | 144644 | 144892 | 1636957 | 1636709 | 1307633 | 1307881 |
| 2026 | BPSS1934 |                    | 26 | 142993 | 143460 | 152493 | 152960 | 154048 | 154515 | 142878 | 143345 | 2254497 | 2254030 | 144141 | 144608 | 1637460 | 1636993 | 1307130 | 1307597 |
| 2027 | BPSS1935 |                    | 26 | 141911 | 142774 | 151411 | 152274 | 152966 | 153829 | 141796 | 142659 | 2255579 | 2254716 | 143059 | 143922 | 1638542 | 1637679 | 1306048 | 1306911 |
| 2028 | BPSS1936 |                    | 26 | 141644 | 140121 | 151144 | 149621 | 152699 | 151176 | 141529 | 140006 | 2255846 | 2257369 | 142792 | 141269 | 1638809 | 1640290 | 1305781 | 1304258 |
| 2029 | BPSS1937 |                    | 26 | 140121 | 139636 | 149621 | 149136 | 151176 | 150691 | 140006 | 139521 | 2257369 | 2257854 | 141269 | 140784 | 1640327 | 1640812 | 1304258 | 1303773 |
| 2030 | BPSS1938 |                    | 26 | 139055 | 135843 | 148555 | 145343 | 150110 | 146898 | 138940 | 135728 | 2258435 | 2261647 | 140203 | 136967 | 1641393 | 1644629 | 1303192 | 1299980 |
| 2031 | BPSS1939 |                    | 26 | 135837 | 134716 | 145337 | 144216 | 146892 | 145771 | 135722 | 134601 | 2261653 | 2262774 | 136961 | 135840 | 1644635 | 1645756 | 1299974 | 1298853 |
| 2032 | BPSS1940 |                    | 26 | 134563 | 132731 | 144063 | 142231 | 145618 | 143786 | 134448 | 132616 | 2262927 | 2264759 | 135687 | 133855 | 1645909 | 1647717 | 1298700 | 1296868 |
| 2033 | BPSS1941 |                    | 26 | 130822 | 132381 | 140322 | 141881 | 141877 | 143436 | 130707 | 132266 | 2266668 | 2265109 | 131946 | 133505 | 1649675 | 1648116 | 1294953 | 1296512 |
| 2034 | BPSS1942 |                    | 26 | 130278 | 129772 | 139778 | 139272 | 141333 | 140827 | 130163 | 129657 | 2267212 | 2267718 | 131402 | 130896 | 1650219 | 1650725 | 1294409 | 1293903 |
| 2035 | BPSS1943 |                    | 26 | 129208 | 129708 | 138708 | 139208 | 140263 | 140763 | 129093 | 129593 | 2268282 | 2267782 | 130332 | 130832 | 1651289 | 1650789 | 1293339 | 1293839 |
| 2036 | BPSS1944 |                    | 26 | 128106 | 129128 | 137606 | 138628 | 139161 | 140183 | 127991 | 129013 | 2269384 | 2268362 | 129230 | 130252 | 1652391 | 1651369 | 1292237 | 1293259 |
| 2037 | BPSS1945 |                    | 26 | 127043 | 127888 | 136543 | 137388 | 138098 | 138943 | 126928 | 127773 | 2270447 | 2269602 | 128167 | 129012 | 1653454 | 1652609 | 1291174 | 1292019 |
| 2038 | BPSS1946 |                    | 26 | 125034 | 127043 | 134534 | 136543 | 135412 | 135978 | 124919 | 126928 | 2272456 | 2270447 | 126158 | 128167 | 1655463 | 1653454 | 1289165 | 1291174 |
| 2039 | BPSS1947 |                    | 26 | 124301 | 125047 | 133801 | 134547 |        |        | 124186 | 124932 | 2273189 | 2272443 | 125425 | 126171 | 1656196 | 1655450 | 1288432 | 1289178 |
| 2040 | BPSS1948 |                    | 26 | 124039 | 124284 | 133539 | 133784 | 134431 | 134676 | 123924 | 124169 | 2273451 | 2273206 | 125163 | 125408 | 1656458 | 1656213 | 1288167 | 1288415 |
| 2041 | BPSS1949 |                    | 26 | 123341 | 124039 | 132841 | 133539 | 133733 | 134431 | 123226 | 123924 | 2274149 | 2273451 | 124465 | 125163 | 1657156 | 1656458 | 1287469 | 1288167 |
| 2042 | BPSS1950 |                    | 26 | 123045 | 123341 | 132545 | 132841 | 133437 | 133733 | 122930 | 123226 | 2274445 | 2274149 | 124169 | 124465 | 1657452 | 1657156 | 1287173 | 1287469 |
| 2043 | BPSS1951 |                    | 26 | 122582 | 123040 | 132082 | 132540 | 132974 | 133432 | 122467 | 122925 | 2274908 | 2274450 | 123706 | 124164 | 1657915 | 1657457 | 1286710 | 1287168 |
| 2044 | BPSS1952 |                    | 26 | 122100 | 122552 | 131600 | 132052 | 132492 | 132944 | 122079 | 122357 | 2275390 | 2274938 | 123224 | 123676 | 1658397 | 1657945 | 1286228 | 1286680 |
| 2045 | BPSS1953 |                    | 26 | 120587 | 122107 | 130087 | 131607 | 130979 | 132499 | 120566 | 122086 | 2276903 | 2275383 | 121711 | 123231 | 1659910 | 1658390 | 1284715 | 1286235 |
| 2046 | BPSS1954 |                    | 26 | 120145 | 118355 | 129645 | 127855 | 130537 | 128747 | 120124 | 118334 | 2277345 | 2279135 | 121269 | 119479 | 1660352 | 1662142 | 1284273 | 1282483 |
| 2047 | BPSS1955 |                    | 26 | 118341 | 116941 | 127841 | 126441 | 128733 | 127333 | 118320 | 116920 | 2279149 | 2280549 | 119465 | 118065 | 1662156 | 1663556 | 1282469 | 1281069 |
| 2048 | BPSS1956 |                    | 26 | 116941 | 115766 | 126441 | 125266 | 127333 | 126158 | 116920 | 115745 | 2280549 | 2281724 | 118065 | 116890 | 1663556 | 1664731 | 1281069 | 1279894 |
| 2049 | BPSS1957 |                    | 26 | 114189 | 115127 | 123689 | 124627 | 124581 | 125519 | 114168 | 115106 | 2283301 | 2282363 | 115313 | 116251 | 1666308 | 1665370 | 1278317 | 1279255 |
| 2050 | BPSS1958 |                    | 26 | 112951 | 113595 | 122465 | 123109 | 123343 | 123987 | 112930 | 113574 | 2284679 | 2284035 | 114243 | 114887 | 1667441 | 1666797 | 1277086 | 1277730 |
| 2051 | BPSS1959 |                    | 26 | 112033 | 112422 | 121547 | 121936 | 122425 | 122814 | 112012 | 112401 | 2285624 | 2285235 | 113334 | 113723 | 1668359 | 1667970 | 1276177 | 1276566 |
| 2052 | BPSS1960 |                    | 26 | 110433 | 111761 | 119658 | 120542 | 120825 | 122153 | 110412 | 111740 | 2287232 | 2285904 | 111734 | 113062 | 1669959 | 1668631 | 1274577 | 1275905 |







|      |           |                 |        |        |        |        |        |        |        |        |        |        |         |         |        |        |         |         |         |         |        |        |
|------|-----------|-----------------|--------|--------|--------|--------|--------|--------|--------|--------|--------|--------|---------|---------|--------|--------|---------|---------|---------|---------|--------|--------|
| 2155 | BPSS2061  | GI16            |        |        |        |        |        |        |        |        |        |        |         |         |        |        |         |         |         |         |        |        |
| 2156 | BPSS2061A | GI16            |        |        |        |        |        |        |        |        |        |        |         |         |        |        |         |         |         |         |        |        |
| 2157 | BPSS2062  | GI16            |        |        |        |        |        |        |        |        |        |        |         |         |        |        |         |         |         |         |        |        |
| 2158 | BPSS2063  | GI16            |        |        |        |        |        |        |        |        |        |        |         |         |        |        |         |         |         |         |        |        |
| 2159 | BPSS2064  | GI16            |        |        |        |        |        |        |        |        |        |        |         |         |        |        |         |         |         |         |        |        |
| 2160 | BPSS2065  | GI16            |        |        |        |        |        |        |        |        |        |        |         |         |        |        |         |         |         |         |        |        |
| 2161 | BPSS2066  | GI16            |        |        |        |        |        |        |        |        |        |        |         |         |        |        |         |         |         |         |        |        |
| 2162 | BPSS2067  | GI16            |        |        |        |        |        |        |        |        |        |        |         |         |        |        |         |         |         |         |        |        |
| 2163 | BPSS2068  | GI16            |        |        |        |        |        |        |        |        |        |        |         |         |        |        |         |         |         |         |        |        |
| 2164 | BPSS2069  | GI16            |        |        |        |        |        |        |        |        |        |        |         |         |        |        |         |         |         |         |        |        |
| 2165 | BPSS2070  | GI16            |        |        |        |        |        |        |        |        |        |        |         |         |        |        |         |         |         |         |        |        |
| 2166 | BPSS2071  | GI16            |        |        |        |        |        |        |        |        |        |        |         |         |        |        |         |         |         |         |        |        |
| 2167 | BPSS2072  | GI16            |        |        |        |        |        |        |        |        |        |        |         |         |        |        |         |         |         |         |        |        |
| 2168 | BPSS2073  | GI16            |        |        |        |        |        |        |        |        |        |        |         |         |        |        |         |         |         |         |        |        |
| 2169 | BPSS2074  | GI16            |        |        |        |        |        |        |        |        |        |        |         |         |        |        |         |         |         |         |        |        |
| 2170 | BPSS2074a | GI16            |        |        |        |        |        |        |        |        |        |        |         |         |        |        |         |         |         |         |        |        |
| 2171 | BPSS2075  | GI16            |        |        |        |        |        |        |        |        |        |        |         |         |        |        |         |         |         |         |        |        |
| 2172 | BPSS2076  | GI16            |        |        |        |        |        |        |        |        |        |        |         |         |        |        |         |         |         |         |        |        |
| 2173 | BPSS2078  | GI16            |        |        |        |        |        |        |        |        |        |        |         |         |        |        |         |         |         |         |        |        |
| 2174 | BPSS2079  | GI16            |        |        |        |        |        |        |        |        |        |        |         |         |        |        |         |         |         |         |        |        |
| 2175 | BPSS2080  | GI16            |        |        |        |        |        |        |        |        |        |        |         |         |        |        |         |         |         |         |        |        |
| 2176 | BPSS2081  | GI16            |        |        |        |        |        |        |        |        |        |        |         |         |        |        |         |         |         |         |        |        |
| 2177 | BPSS2082  | GI16            |        |        |        |        |        |        |        |        |        |        |         |         |        |        |         |         |         |         |        |        |
| 2178 | BPSS2083  | GI16            |        |        |        |        |        |        |        |        |        |        |         |         |        |        |         |         |         |         |        |        |
| 2179 | BPSS2084  | GI16            |        |        |        |        |        |        |        |        |        |        |         |         |        |        |         |         |         |         |        |        |
| 2180 | BPSS2085  | GI16            |        |        |        |        |        |        |        |        |        |        |         |         |        |        |         |         |         |         |        |        |
| 2181 | BPSS2086  | GI16            |        |        |        |        |        |        |        |        |        |        |         |         |        |        |         |         |         |         |        |        |
| 2182 | BPSS2087  | GI16            |        |        |        |        |        |        |        |        |        |        |         |         |        |        |         |         |         |         |        |        |
| 2183 | BPSS2088  | GI16            |        |        |        |        |        |        |        |        |        |        |         |         |        |        |         |         |         |         |        |        |
| 2184 | BPSS2089  | GI16            |        |        |        |        |        |        |        |        |        |        |         |         |        |        |         |         |         |         |        |        |
| 2185 | BPSS2090  | GI16            |        |        |        |        |        |        |        |        |        |        |         |         |        |        |         |         |         |         |        |        |
| 2186 |           | Chr_74_IS407A_A | 408708 | 409943 | 418863 | 420098 | 447920 | 449155 | 407716 | 408951 | 363336 | 364571 | 1838857 | 1840092 | 410900 | 412135 | 1498717 | 1499952 | 1575233 | 1576468 | 370625 | 371860 |
| 2187 | BPSS2091  | 28              | 407753 | 408310 | 417908 | 418465 | 446965 | 447522 | 406761 | 407318 | 362381 | 362938 | 1837902 | 1838459 | 409945 | 410502 | 1500907 | 1500350 | 1574278 | 1574835 | 369670 | 370227 |
| 2188 | BPSS2092  | 28              | 407027 | 407119 | 417182 | 417274 | 446239 | 446331 | 406035 | 406127 | 361655 | 361747 | 1837176 | 1837268 | 409219 | 409311 | 1501633 | 1501541 | 1573552 | 1573644 | 368944 | 369036 |
| 2189 | BPSS2093  | 28              | 404807 | 407008 | 414962 | 417163 | 444019 | 446220 | 403815 | 406016 | 359435 | 361636 | 1834956 | 1837157 | 406999 | 409200 | 1503853 | 1501652 | 1571332 | 1573533 | 366724 | 368925 |
| 2190 | BPSS2094  | 28              | 402174 | 404807 | 412329 | 414962 | 441386 | 444019 | 401182 | 403815 | 356802 | 359435 | 1832323 | 1834956 | 404366 | 406999 | 1506486 | 1503853 | 1568699 | 1571332 | 364091 | 366724 |
| 2191 | BPSS2095  | 28              | 400687 | 402174 | 410842 | 412329 | 439899 | 441386 | 399695 | 401182 | 355327 | 356802 | 1830848 | 1832323 | 402891 | 404366 | 1507961 | 1506486 | 1567224 | 1568699 | 362616 | 364091 |
| 2192 | BPSS2096  | 28              | 398819 | 400687 | 408974 | 410842 | 438031 | 439899 | 397827 | 399695 | 353459 | 355327 | 1828980 | 1830848 | 401023 | 402891 | 1509829 | 1507961 | 1565356 | 1567224 | 360751 | 362616 |
| 2193 | BPSS2097  | 28              | 398287 | 398811 | 408442 | 408966 | 437499 | 438023 | 397295 | 397819 | 352927 | 353451 | 1828448 | 1828972 | 400491 | 401015 | 1510361 | 1509837 | 1564824 | 1565348 | 360219 | 360743 |
| 2194 | BPSS2098  | 28              | 397744 | 398232 | 407899 | 408387 | 436956 | 437444 | 396752 | 397240 | 352384 | 352872 | 1827905 | 1828393 | 399948 | 400436 | 1510904 | 1510416 | 1564281 | 1564769 | 359676 | 360164 |
| 2195 | BPSS2099  | 28              | 396176 | 397681 | 406331 | 407836 | 435388 | 436893 | 395184 | 396689 | 350816 | 352321 | 1826337 | 1827842 | 398380 | 399885 | 1512472 | 1510967 | 1562713 | 1564218 | 358108 | 359613 |
| 2196 | BPSS2100  | 28              | 395605 | 396180 | 405760 | 406335 | 434817 | 435392 | 394613 | 395188 | 350245 | 350820 | 1825766 | 1826341 | 397809 | 398384 | 1513043 | 1512468 | 1562142 | 1562717 | 357537 | 358112 |
| 2197 | BPSS2101  | 28              | 394463 | 395539 | 404618 | 405694 | 433675 | 434751 | 393471 | 394547 | 349103 | 350179 | 1824624 | 1825700 | 396667 | 397743 | 1514185 | 1513109 | 1561000 | 1562076 | 356395 | 357471 |
| 2198 | BPSS2102  | 28              | 391813 | 394407 | 402038 | 403321 | 431025 | 433619 | 390821 | 393415 | 346453 | 349047 | 1821974 | 1824568 | 394017 | 396611 | 1516835 | 1514241 | 1558359 | 1560944 | 353930 | 355639 |
| 2199 | BPSS2103  | 28              |        |        |        |        |        |        |        |        |        |        | 1820858 | 1821760 | 392901 | 393803 | 1517951 | 1517049 |         |         |        |        |
| 2200 | BPSS2104  | 28              | 387061 | 390687 | 397286 | 400912 | 426273 | 429899 | 386069 | 389695 | 341701 | 345327 | 1817232 | 1820858 | 389275 | 392901 | 1521577 | 1517951 | 1553607 | 1557233 | 349178 | 352804 |
| 2201 | BPSS2105  | 28              | 385742 | 387055 | 395967 | 397280 | 424954 | 426267 | 384750 | 386063 | 340382 | 341695 | 1815913 | 1817226 | 387956 | 389269 | 1522896 | 1521583 | 1552288 | 1553601 | 347859 | 349172 |
| 2202 | BPSS2106  | 28              | 384338 | 385723 | 394563 | 395948 | 423550 | 424935 | 383346 | 384731 | 338978 | 340363 | 1814509 | 1815894 | 386552 | 387937 | 1524300 | 1522915 | 1550884 | 1552269 | 346455 | 347840 |
| 2203 | BPSS2107  | 28              | 383808 | 384323 | 394033 | 394548 | 423020 | 423535 | 382816 | 383331 | 338448 | 338963 | 1813979 | 1814494 | 386022 | 386537 | 1524830 | 1524315 | 1550354 | 1550869 | 345925 | 346440 |
| 2204 | BPSS2108  | 28              | 383117 | 382770 | 393342 | 392995 | 422329 | 421982 | 382125 | 381778 | 337757 | 337410 | 1813288 | 1812941 | 385331 | 384984 | 1525521 | 1525868 | 1549663 | 1549316 | 345234 | 344887 |
| 2205 | BPSS2109  | 28              | 382712 | 381279 | 392937 | 391504 | 421924 | 420491 | 381720 | 380287 | 337352 | 335919 | 1812883 | 1811450 | 384926 | 383493 | 1525926 | 1527359 | 1549258 | 1547825 | 344829 | 343396 |

|                |                  |         |         |         |         |         |         |         |         |         |         |         |         |         |         |         |         |         |         |         |         |  |
|----------------|------------------|---------|---------|---------|---------|---------|---------|---------|---------|---------|---------|---------|---------|---------|---------|---------|---------|---------|---------|---------|---------|--|
| 2206 BPSS2110  | 28               | 379335  | 381230  | 389560  | 391455  | 418547  | 420442  | 378343  | 380238  | 333975  | 335870  | 1809506 | 1811401 | 381549  | 383444  | 1529303 | 1527408 | 1545881 | 1547776 | 341452  | 343347  |  |
| 2207 BPSS2111  | 28               | 378907  | 378857  | 389132  | 389082  | 418119  | 418069  | 377915  | 377865  | 333547  | 333497  | 1809078 | 1809028 | 381121  | 381071  | 1529731 | 1529781 | 1545453 | 1545403 | 341024  | 340974  |  |
| 2208 BPSS2112  | 28               | 377312  | 376998  | 387537  | 387223  | 416524  | 416210  | 376320  | 376006  | 331952  | 331638  | 1807483 | 1807169 | 379526  | 379212  | 1531326 | 1531640 | 1543858 | 1543544 | 339429  | 339115  |  |
| 2209 BPSS2113  | 28               | 376946  | 376773  | 387171  | 386998  | 416158  | 415985  | 375954  | 375781  | 331586  | 331413  | 1807117 | 1806944 | 379160  | 378987  | 1531692 | 1531865 | 1543492 | 1543319 | 339063  | 338890  |  |
| 2210 BPSS2114  | 28               | 375504  | 376205  | 385729  | 386430  | 414716  | 415417  | 374512  | 375213  | 330174  | 330875  | 1805745 | 1806446 | 377798  | 378499  | 1533084 | 1532383 | 1542090 | 1542791 | 337701  | 338402  |  |
| 2211 BPSS2115  | 28               | 375337  | 374411  | 385562  | 384636  | 414549  | 413623  | 374345  | 373419  | 330007  | 329081  | 1805578 | 1804652 | 377631  | 376705  | 1533251 | 1534177 | 1541923 | 1540997 | 337534  | 336608  |  |
| 2212 BPSS2116  | 28               | 372922  | 373377  | 383147  | 383602  | 412134  | 412589  | 371930  | 372385  | 327592  | 328047  | 1803175 | 1803630 | 375228  | 375683  | 1535654 | 1535199 | 1539508 | 1539963 | 335119  | 335574  |  |
| 2213 BPSS2117  | 28               | 372825  | 371887  | 383050  | 382112  | 412037  | 411099  | 371833  | 370895  | 327495  | 326557  | 1803078 | 1802140 | 375131  | 374193  | 1535751 | 1536689 | 1539411 | 1538473 | 335022  | 334084  |  |
| 2214 BPSS2118  | 28               | 370196  | 370885  | 380421  | 381110  | 409408  | 410097  | 369204  | 369893  | 324866  | 325555  | 1800449 | 1801138 | 372502  | 373191  | 1538395 | 1537706 | 1536782 | 1537471 | 332393  | 333082  |  |
| 2215 BPSS2119  | 28               | 370141  | 369404  | 380366  | 379629  | 409353  | 408616  | 369149  | 368412  | 324811  | 324074  | 1800394 | 1799657 | 372447  | 371710  | 1538450 | 1539187 | 1536727 | 1535990 | 332338  | 331601  |  |
| 2216 BPSS2120  | 28               | 369396  | 368158  | 379621  | 378383  | 408608  | 407370  | 368404  | 367166  | 324066  | 322828  | 1799649 | 1798411 | 371702  | 370464  | 1539195 | 1540433 | 1535982 | 1534744 | 331593  | 330355  |  |
| 2217 BPSS2121  | 28               | 368108  | 366990  | 378333  | 377215  | 407320  | 406202  | 367116  | 365998  | 322778  | 321660  | 1798361 | 1797243 | 370414  | 369296  | 1540483 | 1541601 | 1534694 | 1533576 | 330305  | 329187  |  |
| 2218 BPSS2122  | 28               | 366098  | 366493  | 376323  | 376718  | 405310  | 405705  | 365106  | 365501  | 320768  | 321163  | 1796351 | 1796746 | 368404  | 368799  | 1542493 | 1542098 | 1532684 | 1533079 | 328295  | 328690  |  |
| 2219 BPSS2123  | 28               | 365594  | 364314  | 375819  | 374539  | 404806  | 403526  | 364602  | 363322  | 320264  | 318984  | 1795847 | 1794567 | 367900  | 366620  | 1542997 | 1544277 | 1532180 | 1530900 | 327791  | 326511  |  |
| 2220 BPSS2124  | 28               | 363545  | 362625  | 373762  | 372842  | 402749  | 401829  | 362561  | 361641  | 318262  | 317342  | 1793846 | 1792926 | 365930  | 365010  | 1544952 | 1545872 | 1530185 | 1529265 | 325763  | 324843  |  |
| 2221 BPSS2125  | 28               | 362557  | 361418  | 372774  | 371635  | 401761  | 400622  | 361573  | 360434  | 317274  | 316135  | 1792858 | 1791719 | 364942  | 363803  | 1545940 | 1547079 | 1529197 | 1528058 | 324775  | 323636  |  |
| 2222 BPSS2126  | 28               | 360383  | 361228  | 370600  | 371445  | 399587  | 400432  | 359399  | 360244  | 315100  | 315945  | 1790684 | 1791529 | 362768  | 363613  | 1548114 | 1547269 | 1527023 | 1527868 | 322601  | 323446  |  |
| 2223 BPSS2127  | 28               | 359872  | 359051  | 370089  | 369268  | 399076  | 398255  | 358888  | 358067  | 314589  | 313768  | 1790173 | 1789352 | 362257  | 361436  |         |         | 1526512 | 1525691 | 322090  | 321269  |  |
| 2224 BPSS2128  | 28               | 358757  | 357357  | 368716  | 367316  | 397684  | 396284  | 357858  | 356458  | 313474  | 312074  | 1789058 | 1787658 | 361142  | 359742  | 1549076 | 1550476 | 1525397 | 1523997 | 320907  | 319507  |  |
| 2225 BPSS2129  | 28               | 357168  | 356620  | 367127  | 366579  | 396095  | 395547  | 356269  | 355721  | 311885  | 311337  | 1787469 | 1786921 | 359553  | 359005  | 1550794 | 1551219 | 1523808 | 1523260 | 319318  | 318770  |  |
| 2226 BPSS2130  | 28               | 353701  | 356109  | 363660  | 366068  | 392628  | 395036  | 352951  | 354423  | 308418  | 310826  | 1784002 | 1786410 | 356086  | 358494  | 1554146 | 1554057 | 1520341 | 1522749 | 315851  | 318259  |  |
| 2227 BPSS2131  | 28               | 351917  | 352204  | 361414  | 361701  | 390033  | 390320  | 351123  | 351410  | 306634  | 306921  | 1782218 | 1782505 | 354302  | 354589  | 1556133 | 1555846 | 1518557 | 1518844 | 314239  | 314526  |  |
| 2228 BPSS2131a | 28               | 350902  | 351456  | 360399  | 360953  | 389018  | 389572  | 350108  | 350662  | 305619  | 306173  | 1781203 | 1781757 | 353287  | 353841  | 1557148 | 1556594 | 1517542 | 1518096 | 313224  | 313778  |  |
| 2229 BPSS2132  | 28               | 349087  | 350604  | 358584  | 360101  | 387203  | 388720  | 348293  | 349810  | 303901  | 305418  | 1779388 | 1780905 | 351472  | 352989  | 1558963 | 1557446 | 1515727 | 1517244 | 311879  | 312583  |  |
| 2230 BPSS2133  | 28               | 348743  | 347382  | 358240  | 356879  | 386859  | 385498  | 347949  | 346588  | 303557  | 302196  | 1779044 | 1777683 | 351128  | 349767  | 1559308 | 1560669 | 1515383 | 1514022 | 311535  | 310174  |  |
| 2231 BPSS2134  | 28               | 347021  | 346779  | 356518  | 356276  | 385137  | 384895  | 346227  | 345985  | 301835  | 301593  | 1777322 | 1777080 | 349406  | 349164  | 1561030 | 1561272 | 1513661 | 1513419 | 309813  | 309571  |  |
| 2232 BPSS2135  | 28               | 346621  | 345632  | 356118  | 355129  | 384737  | 383748  | 345827  | 344838  | 301435  | 300446  | 1776922 | 1775933 | 349006  | 348017  | 1561430 | 1562422 | 1513261 | 1512272 | 309413  | 308424  |  |
| 2233 BPSS2136  | 28               | 343855  | 345294  | 353352  | 354791  | 381971  | 383410  | 343061  | 344500  | 298669  | 300108  | 1774156 | 1775595 | 346240  | 347679  | 1564210 | 1562771 | 1510495 | 1511934 | 306647  | 308086  |  |
| 2234 BPSS2137  | 28               | 342546  | 343676  | 352043  | 353173  | 380662  | 381792  | 341752  | 342882  | 297360  | 298490  | 1772847 | 1773977 | 344931  | 346061  | 1565520 | 1564519 | 1509186 | 1510316 | 305338  | 306468  |  |
| 2235 BPSS2138  | 28               | 341560  | 342546  | 351057  | 352043  | 379676  | 380662  | 340766  | 341752  | 296374  | 297360  | 1771861 | 1772847 | 343945  | 344931  | 1566506 | 1565520 | 1508200 | 1509186 | 304352  | 305338  |  |
| 2236 BPSS2139  | 28               | 340656  | 341555  | 350153  | 351052  | 378772  | 379671  | 339862  | 340761  | 295470  | 296369  | 1770957 | 1771856 | 343041  | 343940  | 1567410 | 1566511 | 1507296 | 1508195 | 303448  | 304347  |  |
| 2237 BPSS2140  | 28               | 339706  | 340641  | 349203  | 350138  | 377822  | 378757  | 338912  | 339847  | 294520  | 295455  | 1770007 | 1770942 | 342091  | 343026  | 1568360 | 1567425 | 1506346 | 1507281 | 302498  | 303433  |  |
| 2238 BPSS2141  | 28               | 338024  | 339685  | 347521  | 349182  | 376140  | 377801  | 337230  | 338891  | 292838  | 294499  | 1768325 | 1769986 | 340409  | 342070  | 1570042 | 1568381 | 1504664 | 1506325 | 300816  | 302477  |  |
| 2239 BPSS2142  | 28               | 337307  | 337885  | 346804  | 347382  | 375423  | 376001  | 336513  | 337091  | 292121  | 292699  | 1767608 | 1768186 | 339692  | 340270  | 1570759 | 1570181 | 1503947 | 1504525 | 300099  | 300677  |  |
| 2240 BPSS2143  | 28               | 336671  | 335172  | 346168  | 344669  | 374787  | 373288  | 335877  | 334378  | 291485  | 289986  | 1766972 | 1765473 | 339056  | 337557  | 1571395 | 1572894 | 1503311 | 1501812 | 299463  | 297964  |  |
| 2241 BPSS2144  | 28               | 334730  | 334530  | 344227  | 344027  | 372846  | 372646  | 333936  | 333736  | 289544  | 289344  | 1765031 | 1764831 | 337115  | 336915  | 1573336 | 1573536 | 1501370 | 1501170 | 297522  | 297322  |  |
| 2242 BPSS2145  | 28               | 332777  | 334453  | 342274  | 343950  | 370893  | 372569  | 331983  | 333659  | 287591  | 289267  | 1763066 | 1764754 | 335150  | 336838  | 1575301 | 1573613 | 1499417 | 1501093 | 295569  | 297245  |  |
| 2243 BPSS2146  | 28               | 331485  | 332495  | 340982  | 341992  | 369601  | 370611  | 330691  | 331701  | 286299  | 287309  | 1761774 | 1762784 | 333858  | 334868  | 1576593 | 1575583 | 1498125 | 1499135 | 294277  | 295287  |  |
| 2244 BPSS2147  | 28               | 331030  | 331281  | 340527  | 340778  | 369146  | 369397  | 330236  | 330487  | 285844  | 286095  | 1761319 | 1761570 | 333403  | 333654  | 1577048 | 1576797 | 1497670 | 1497921 | 293822  | 294073  |  |
| 2245 BPSS2148  | 28               | 330730  | 330876  | 340227  | 340373  | 368846  | 368992  | 329936  | 330082  | 285544  | 285690  | 1761019 | 1761165 | 333103  | 333249  | 1577348 | 1577202 | 1497373 | 1497516 | 1795287 | 1795592 |  |
| 2246           | Chr2_75_IS407A_A | 329696  | 330729  | 339193  | 340226  | 367812  | 368845  | 328902  | 329935  | 284510  | 285543  | 1759985 | 1761018 | 332069  | 333102  | 1577349 | 1578382 | 1496137 | 1497372 | 291658  | 292532  |  |
| 2247 BPSS2148a |                  |         |         |         |         |         |         |         |         |         |         |         |         |         |         |         |         |         |         |         |         |  |
| 2248 BPSS2149  |                  |         |         |         |         |         |         |         |         |         |         |         |         |         |         |         |         |         |         |         |         |  |
| 2249 BPSS2150  |                  |         |         |         |         |         |         |         |         |         |         |         |         |         |         |         |         |         |         |         |         |  |
| 2250 BPSS2151  |                  |         |         |         |         |         |         |         |         |         |         |         |         |         |         |         |         |         |         |         |         |  |
| 2251 BPSS2152  |                  |         |         |         |         |         |         |         |         |         |         |         |         |         |         |         |         |         |         |         |         |  |
| 2252 BPSS2153  |                  |         |         |         |         |         |         |         |         |         |         |         |         |         |         |         |         |         |         |         |         |  |
| 2253 BPSS2154  |                  |         |         |         |         |         |         |         |         |         |         |         |         |         |         |         |         |         |         |         |         |  |
| 2254 BPSS2155  |                  |         |         |         |         |         |         |         |         |         |         |         |         |         |         |         |         |         |         |         |         |  |
| 2255           | Chr2_76_IS407A_A | 2135943 | 2137178 | 2173035 | 2174270 | 2146619 | 2147854 | 2128166 | 2129401 | 2097872 | 2099107 | 1307203 | 1308438 | 2164773 | 2166008 | 2030650 | 2031885 | 977425  | 978660  | 132158  | 133393  |  |
| 2256 BPSS2156  | 29               | 2137922 | 2137281 | 2175014 | 2174373 | 2148598 | 2147957 | 2130145 | 2129504 | 2099851 | 2099210 | 1309182 | 1308541 | 2166752 | 2166111 | 2032630 | 2032088 | 979404  | 978763  | 131414  | 132055  |  |







|      |          |    |         |         |         |         |         |         |         |         |         |         |         |         |         |         |         |         |         |         |
|------|----------|----|---------|---------|---------|---------|---------|---------|---------|---------|---------|---------|---------|---------|---------|---------|---------|---------|---------|---------|
| 2359 | BPSS2256 | 29 | 2181246 | 2180626 | 2218865 | 2218245 | 2193872 | 2193252 | 2173242 | 2172622 | 2143166 | 2142546 | 1352497 | 1351877 | 2210058 | 2209438 | 1022736 | 1022116 | 2019815 | 2019195 |
| 2360 | BPSS2257 | 29 | 2182000 | 2181248 | 2221969 | 2218867 | 2194626 | 2193874 | 2173996 | 2173244 | 2143920 | 2143168 | 1353251 | 1352499 | 2210812 | 2210060 | 1023490 | 1022738 | 2020569 | 2019817 |
| 2361 | BPSS2258 | 29 | 2182707 | 2182216 | 2220326 | 2219835 | 2195333 | 2194842 | 2174703 | 2174212 | 2144627 | 2144136 | 1353958 | 1353467 | 2211519 | 2211028 | 1024197 | 1023706 | 2021276 | 2020785 |
| 2362 | BPSS2259 | 29 | 2185637 | 2183133 | 2223256 | 2220752 | 2198263 | 2195759 | 2177633 | 2175129 | 2147568 | 2144605 | 1356899 | 1353936 | 2214460 | 2211497 | 1027138 | 1024175 | 2024217 | 2021254 |
| 2363 | BPSS2260 | 29 | 2186802 | 2185738 | 2224421 | 2223357 | 2200272 | 2200048 | 2178798 | 2177734 | 2148733 | 2147669 | 1358064 | 1357000 | 2215625 | 2214561 | 1028303 | 1027239 | 2025382 | 2024318 |
| 2364 | BPSS2261 | 29 | 2188793 | 2187495 | 2226750 | 2225452 | 2202263 | 2200965 | 2180797 | 2179499 | 2150839 | 2149541 | 1360068 | 1358770 | 2217629 | 2216331 | 1030307 | 1029009 | 2027852 | 2026554 |
| 2365 | BPSS2262 | 29 | 2189662 | 2188958 | 2227619 | 2226915 | 2203132 | 2202428 | 2181666 | 2180962 | 2151708 | 2151004 | 1360937 | 1360233 | 2218498 | 2217794 | 1031176 | 1030472 | 2028721 | 2028017 |
| 2366 | BPSS2263 | 29 | 2189990 | 2189748 | 2227947 | 2227705 | 2203460 | 2203218 | 2181994 | 2181752 | 2152036 | 2151794 | 1361265 | 1361023 | 2218826 | 2218584 | 1031504 | 1031262 | 2029049 | 2028807 |
| 2367 | BPSS2264 | 29 | 2191197 | 2190313 | 2229154 | 2228270 | 2204667 | 2203783 | 2183201 | 2182317 | 2153259 | 2152375 | 1362464 | 1361580 | 2220025 | 2219141 | 1032703 | 1031819 | 2030248 | 2029364 |
| 2368 | BPSS2265 | 29 | 2192687 | 2191341 | 2230644 | 2229298 | 2206157 | 2204811 | 2184691 | 2183345 | 2154749 | 2153403 | 1363954 | 1362608 | 2221515 | 2220169 | 1034193 | 1032847 | 2031738 | 2030392 |
| 2369 | BPSS2266 | 29 | 2193783 | 2192971 | 2231740 | 2230928 | 2207253 | 2206441 | 2185787 | 2184975 | 2155845 | 2155033 | 1365050 | 1364238 | 2222611 | 2221799 | 1035289 | 1034477 | 2032834 | 2032022 |
| 2370 | BPSS2267 | 29 | 2195254 | 2194004 | 2233211 | 2231961 | 2208724 | 2207474 | 2187258 | 2186008 | 2157316 | 2156066 | 1366521 | 1365271 | 2224082 | 2222832 | 1036760 | 1035510 | 2034305 | 2033055 |
| 2371 | BPSS2268 | 29 | 2196090 | 2195620 | 2234047 | 2233577 | 2209560 | 2209090 | 2188094 | 2187624 | 2158152 | 2157682 | 1367357 | 1366887 | 2224918 | 2224448 | 1037596 | 1037126 | 2035141 | 2034671 |
| 2372 | BPSS2269 | 29 | 2198139 | 2196985 | 2236096 | 2234942 | 2211609 | 2210455 | 2190143 | 2188989 | 2160201 | 2159047 | 1369406 | 1368252 | 2226967 | 2225813 | 1039645 | 1038491 | 2037190 | 2036036 |
| 2373 | BPSS2270 | 29 | 2200192 | 2198795 | 2238149 | 2236752 | 2213662 | 2212265 | 2192196 | 2190799 | 2162254 | 2160857 | 1371459 | 1370062 | 2229020 | 2227623 | 1041698 | 1040301 | 2039243 | 2037846 |
| 2374 | BPSS2271 | 29 | 2201648 | 2200200 | 2239605 | 2238157 | 2215118 | 2213670 | 2193652 | 2192204 | 2163710 | 2162262 | 1372915 | 1371467 | 2230476 | 2229028 | 1043154 | 1041706 | 2040699 | 2039251 |
| 2375 | BPSS2272 | 29 | 2202693 | 2201653 | 2240650 | 2239610 | 2216163 | 2215123 | 2194697 | 2193657 | 2164755 | 2163715 | 1373960 | 1372920 | 2231521 | 2230481 | 1044199 | 1043159 | 2041744 | 2040704 |
| 2376 | BPSS2273 | 29 | 2203931 | 2202702 | 2241888 | 2240659 | 2217401 | 2216172 | 2195935 | 2194706 | 2165993 | 2164764 | 1375198 | 1373969 | 2232759 | 2231530 | 1045437 | 1044208 | 2042982 | 2041753 |
| 2377 | BPSS2274 | 29 | 2205184 | 2205621 | 2243141 | 2243578 | 2218654 | 2219013 | 2197188 | 2197625 | 2167246 | 2167683 | 1376451 | 1376888 | 2234012 | 2234449 | 1046690 | 1045127 | 2044235 | 2044672 |
| 2378 | BPSS2275 | 29 | 2207074 | 2205962 | 2245031 | 2243919 | 2221033 | 2219921 | 2199078 | 2197966 | 2169136 | 2168024 | 1378341 | 1377229 | 2235902 | 2234790 | 1048580 | 1047468 | 2046125 | 2045013 |
| 2379 | BPSS2276 | 29 | 2207372 | 2208304 | 2245329 | 2246261 | 2221331 | 2222263 | 2199376 | 2200308 | 2169434 | 2170366 | 1378639 | 1379571 | 2236200 | 2237132 | 1048878 | 1049810 | 2046423 | 2047355 |
| 2380 | BPSS2277 | 29 | 2208489 | 2208917 | 2246446 | 2246874 | 2222448 | 2222876 | 2200493 | 2200921 | 2170551 | 2170979 | 1379756 | 1380184 | 2237317 | 2237745 | 1049995 | 1050423 | 2047540 | 2047968 |
| 2381 | BPSS2278 | 29 | 2209211 | 2210875 | 2247168 | 2248832 | 2223170 | 2224834 | 2201215 | 2202879 | 2171273 | 2172937 | 1380478 | 1382142 | 2238039 | 2239703 | 1050717 | 1052381 | 2048262 | 2049926 |
| 2382 | BPSS2279 | 29 | 2213462 | 2211192 | 2251419 | 2249149 | 2227421 | 2225151 | 2205466 | 2203196 | 2175524 | 2173254 | 1384729 | 1382459 | 2242290 | 2240020 | 1054968 | 1052698 | 2052513 | 2050243 |
| 2383 | BPSS2280 | 29 | 2213990 | 2213598 | 2251947 | 2251555 | 2227949 | 2227557 | 2205994 | 2205602 | 2176052 | 2175660 | 1385257 | 1384865 | 2242818 | 2242426 | 1055496 | 1055104 | 2053041 | 2052649 |
| 2384 | BPSS2281 | 29 | 2215357 | 2216619 | 2253314 | 2254576 | 2229316 | 2230578 | 2207361 | 2208623 | 2177439 | 2178701 | 1386634 | 1387857 | 2244200 | 2245423 | 1056883 | 1058145 | 2054418 | 2055680 |
| 2385 | BPSS2282 | 29 | 2216871 | 2218709 | 2254828 | 2256666 | 2230830 | 2232668 | 2208875 | 2210713 | 2178953 | 2180791 | 1388145 | 1389983 | 2245711 | 2247549 | 1058397 | 1060235 | 2055932 | 2057770 |
| 2386 | BPSS2283 | 29 | 2218889 | 2220586 | 2256846 | 2256920 | 2232848 | 2234545 | 2210893 | 2212590 | 2180971 | 2182668 | 1390163 | 1391860 | 2247729 | 2249426 | 1060415 | 1062112 | 2057950 | 2059647 |
| 2387 | BPSS2284 | 29 | 2221117 | 2222145 | 2260414 | 2261442 | 2235076 | 2236104 | 2213121 | 2214149 | 2183200 | 2184228 | 1392386 | 1393414 | 2249952 | 2250980 | 1062644 | 1063672 | 2060179 | 2061207 |
| 2388 | BPSS2285 | 29 | 2222145 | 2223974 | 2261442 | 2263271 | 2236104 | 2237933 | 2214149 | 2215978 | 2184228 | 2186057 | 1393414 | 1395243 | 2250980 | 2252809 | 1063672 | 1065501 | 2061207 | 2063036 |
| 2389 | BPSS2286 | 29 | 2224875 | 2224360 | 2264172 | 2263657 | 2238834 | 2238319 | 2216879 | 2216364 | 2186958 | 2186443 | 1396144 | 1395629 | 2253710 | 2253195 | 1066402 | 1065887 | 2063730 | 2063422 |
| 2390 | BPSS2287 | 29 | 2225260 | 2225910 | 2264557 | 2265207 | 2239219 | 2239869 | 2217264 | 2217914 | 2187343 | 2187993 | 1396529 | 1397179 | 2254095 | 2254745 | 1066787 | 1067437 | 2064226 | 2064876 |
| 2391 | BPSS2288 | 29 | 2226415 | 2225984 | 2265712 | 2265281 | 2240374 | 2239943 | 2218419 | 2217988 | 2188498 | 2188067 | 1397684 | 1397253 | 2255250 | 2254819 | 1067942 | 1067511 | 2065381 | 2064950 |
| 2392 | BPSS2289 | 29 | 2227948 | 2226824 | 2267245 | 2266121 | 2241907 | 2240783 | 2219952 | 2218828 | 2190031 | 2188907 | 1399217 | 1398903 | 2256783 | 2255659 | 1069475 | 1068351 | 2066914 | 2065790 |
| 2393 | BPSS2290 | 29 | 2229833 | 2228031 | 2269130 | 2267328 | 2243792 | 2241990 | 2221837 | 2220035 | 2191916 | 2190114 | 1401102 | 1399300 | 2258668 | 2256866 | 1071360 | 1069558 | 2068799 | 2066997 |
| 2394 | BPSS2291 | 29 | 2232899 | 2230149 | 2272196 | 2269446 | 2246858 | 2244108 | 2224903 | 2222153 | 2194982 | 2192232 | 1404168 | 1401418 | 2261734 | 2258984 | 1074426 | 1071676 | 2071865 | 2069115 |
| 2395 | BPSS2292 | 29 | 2233063 | 2234121 | 2272360 | 2272713 | 2247022 | 2247234 | 2225067 | 2226125 | 2195146 | 2196204 | 1404332 | 1405390 | 2261898 | 2262956 | 1074590 | 1075648 | 2072029 | 2072208 |
| 2396 | BPSS2293 | 29 | 2234227 | 2235207 | 2274169 | 2275149 | 2248805 | 2249785 | 2226231 | 2227211 | 2196310 | 2197290 | 1405496 | 1406476 | 2263062 | 2264042 | 1075754 | 1076734 | 2073100 | 2074080 |
| 2397 | BPSS2294 | 29 | 2235212 | 2236057 | 2275154 | 2275999 | 2249790 | 2250635 | 2227216 | 2228061 | 2197295 | 2198140 | 1406481 | 1407326 | 2264047 | 2264892 | 1076739 | 1077584 | 2074085 | 2074930 |
| 2398 | BPSS2295 | 29 | 2236159 | 2237175 | 2276101 | 2277117 | 2250737 | 2251753 | 2228163 | 2229179 | 2198242 | 2199258 | 1407428 | 1408444 | 2264994 | 2266010 | 1077686 | 1078702 | 2075032 | 2076048 |
| 2399 | BPSS2296 | 29 | 2237345 | 2238667 | 2277287 | 2278609 | 2251923 | 2253245 | 2229349 | 2230671 | 2199428 | 2200750 | 1408614 | 1409936 | 2266180 | 2267502 | 1078872 | 1080194 | 2076218 | 2077540 |
| 2400 | BPSS2297 | 29 | 2238693 | 2239034 | 2278635 | 2278976 | 2253271 | 2253612 | 2230697 | 2231038 | 2200776 | 2201369 | 1409962 | 1410555 | 2267528 | 2268121 | 1080220 | 1080813 | 2077566 | 2078159 |
| 2401 | BPSS2298 | 29 |         |         |         |         |         |         |         |         |         |         | 1410555 | 1410590 |         |         | 1080813 | 1080848 |         |         |
| 2402 | BPSS2299 | 29 | 2239991 | 2242864 | 2279933 | 2282806 | 2254569 | 2257442 | 2231995 | 2234868 | 2202073 | 2204946 | 1411259 | 1414132 | 2268832 | 2271705 | 1081517 | 1084390 | 2078863 | 2081736 |
| 2403 | BPSS2300 | 29 | 2242881 | 2243675 | 2282823 | 2283617 | 2257459 | 2258253 | 2234885 | 2235679 | 2204963 | 2205757 | 1414149 | 1414943 | 2271722 | 2272516 | 1084407 | 1085201 | 2081753 | 2082547 |
| 2404 | BPSS2301 | 29 | 2243736 | 2244683 | 2283678 | 2284625 | 2258314 | 2259261 | 2235740 | 2236687 | 2205818 | 2206765 | 1415004 | 1415951 | 2272577 | 2273524 | 1085262 | 1086209 | 2082608 | 2083555 |
| 2405 | BPSS2302 | 29 | 2245817 | 2246701 | 2285759 | 2286643 | 2260395 | 2261279 | 2237821 | 2238705 | 2207913 | 2208797 | 1417076 | 1417960 | 2274595 | 2275479 | 1087424 | 1088308 | 2084785 | 2085669 |
| 2406 | BPSS2303 | 29 | 2247180 | 2248568 | 2287122 | 2288510 | 2261758 | 2263146 | 2239184 | 2240572 | 2209276 | 2210664 | 1418439 | 1419827 | 2275958 | 2277346 | 1088787 | 1090175 | 2086148 | 2087536 |
| 2407 | BPSS2304 | 29 | 2251273 | 2248757 | 2291215 | 2288699 | 2265851 | 2266335 | 2243277 | 2240761 | 2213369 | 2210853 | 1422532 | 1420016 | 2280051 | 2277535 | 1092880 | 1090364 | 2090241 | 2087725 |
| 2408 | BPSS2305 | 29 | 2253539 | 2251974 | 2293952 | 2292387 | 2268716 | 2267151 | 2245504 | 2243939 | 2215765 | 2214326 | 1424856 | 1423291 | 2282303 | 2280738 | 1095170 | 1093605 | 2092508 | 2091525 |
| 2409 | BPSS2306 | 29 | 2255406 | 2254237 | 22      |         |         |         |         |         |         |         |         |         |         |         |         |         |         |         |

|      |                     |    |         |         |         |         |         |         |         |         |         |         |         |         |         |         |         |         |         |         |         |         |
|------|---------------------|----|---------|---------|---------|---------|---------|---------|---------|---------|---------|---------|---------|---------|---------|---------|---------|---------|---------|---------|---------|---------|
| 2410 | BPSS2307            | 29 | 2257317 | 2255734 | 2297730 | 2296147 | 2272494 | 2270911 | 2249282 | 2247699 | 2219543 | 2217960 | 1428634 | 1427051 | 2286081 | 2284498 |         |         | 1098948 | 1097365 | 2096342 | 2094759 |
| 2411 | BPSS2308            | 29 | 2257832 | 2258152 | 2298245 | 2298565 | 2273009 | 2273329 | 2249787 | 2250107 | 2220008 | 2220328 | 1429149 | 1429469 | 2286536 | 2286856 |         |         | 1099603 | 1099923 | 2096877 | 2097197 |
| 2412 | BPSS2309            | 29 | 2258922 | 2258350 | 2299335 | 2298763 | 2274099 | 2273527 | 2250877 | 2250305 | 2221098 | 2220526 | 1430239 | 1429667 | 2287626 | 2287054 |         |         | 1100693 | 1100121 | 2097967 | 2097395 |
| 2413 | BPSS2310            | 29 | 2259476 | 2258922 | 2299889 | 2299335 | 2274653 | 2274099 | 2251431 | 2250877 | 2221652 | 2221098 | 1430793 | 1430239 | 2288180 | 2287626 |         |         | 1101247 | 1100693 | 2098521 | 2097967 |
| 2414 | BPSS2311            | 29 | 2260842 | 2259484 | 2301255 | 2299897 | 2276019 | 2274661 | 2252797 | 2251439 | 2223018 | 2221660 | 1432159 | 1430801 | 2289546 | 2288188 |         |         | 1102613 | 1101255 | 2099887 | 2098529 |
| 2415 | BPSS2312            | 29 | 2262275 | 2260845 | 2302688 | 2301258 | 2277452 | 2276022 | 2254230 | 2252800 | 2224451 | 2223021 | 1433592 | 1432162 | 2290979 | 2289549 |         |         | 1104046 | 1102616 | 2101320 | 2099890 |
| 2416 | BPSS2313            | 29 | 2262618 | 2262271 | 2303031 | 2302684 | 2277795 | 2277448 | 2254573 | 2254226 | 2224794 | 2224447 | 1433935 | 1433588 | 2291322 | 2290975 |         |         | 1104389 | 1104042 | 2101663 | 2101316 |
| 2417 | BPSS2314            | 29 | 2263491 | 2264888 | 2303904 | 2305301 | 2278668 | 2280065 | 2255446 | 2256843 | 2225667 | 2227064 | 1434808 | 1436205 | 2292195 | 2293592 |         |         | 1105262 | 1106659 | 2102536 | 2103933 |
| 2418 | BPSS2315            | 29 | 2264888 | 2265532 | 2305301 | 2305945 | 2280065 | 2280709 | 2256843 | 2257487 | 2227064 | 2227708 | 1436205 | 1436849 | 2293592 | 2294236 |         |         | 1106659 | 1107303 | 2103933 | 2104577 |
| 2419 | Chr2_79_ISBma1_A    | 29 | 2265680 | 2266984 | 2306093 | 2307397 | 2280857 | 2282161 | 2257635 | 2258939 | 2227856 | 2229160 | 1436997 | 1438301 | 2294384 | 2295688 |         |         | 1107451 | 1108755 | 2104725 | 2106029 |
| 2420 | Chr2_80a_ISBma2_A   |    | 2267009 | 2267068 | 2307422 | 2307481 | 2282186 | 2282245 | 2258964 | 2259023 | 2229185 | 2230757 | 1438326 | 1439898 | 2295713 | 2297285 | 2051909 | 2053481 | 1108780 | 1110352 | 2106054 | 2107626 |
| 2421 | Chr2_81_IS407A_B    |    | 2267062 | 2268297 | 2307475 | 2308710 | 2282239 | 2283474 | 2259017 | 2260252 |         |         |         |         |         |         |         |         |         |         |         |         |
| 2422 | Chr2_80a-1_ISBma2_A |    | 2268298 | 2269821 | 2308711 | 2310234 | 2283475 | 2284998 | 2260253 | 2261776 |         |         |         |         |         |         |         |         |         |         |         |         |
| 2423 | Chr2_80b_ISBma2_A   |    |         |         |         |         |         |         |         |         | 121539  | 123111  |         |         |         |         |         |         |         |         |         |         |
| 2424 | BPSS2316            | 1  | 2270469 | 2269876 | 2310882 | 2310289 | 2285646 | 2285053 | 2262424 | 2261831 | 120891  | 121484  | 1440546 | 1439953 | 2297933 | 2297340 | 2054129 | 2053536 | 1111000 | 1110407 | 2108274 | 2107681 |
| 2425 | BPSS2317            | 1  | 2271526 | 2270765 | 2311939 | 2311178 | 2286703 | 2285942 | 2263481 | 2262720 | 119834  | 120595  | 1441603 | 1440842 | 2298990 | 2298229 | 2055186 | 2054425 | 1112057 | 1111296 | 2109331 | 2108570 |
| 2426 | BPSS2318            | 1  | 2273977 | 2271539 | 2314390 | 2311952 | 2289154 | 2286716 | 2265932 | 2263494 | 117383  | 119821  | 1444054 | 1441616 | 2301441 | 2299003 | 2057637 | 2055199 | 1114508 | 1112070 | 2111782 | 2109344 |
| 2427 | BPSS2319            | 1  | 2275364 | 2274297 | 2315777 | 2314710 | 2290541 | 2289474 | 2267319 | 2266252 | 115996  | 117063  | 1445441 | 1444374 | 2302828 | 2301761 | 2059024 | 2057957 | 1115895 | 1114828 | 2112884 | 2112102 |
| 2428 | BPSS2320            | 1  | 2276186 | 2275494 | 2316599 | 2315907 | 2291363 | 2290671 | 2268141 | 2267449 | 115174  | 115866  | 1446263 | 1445571 | 2303650 | 2302958 | 2059846 | 2059154 | 1116717 | 1116025 | 2113472 | 2112987 |
| 2429 | BPSS2321            | 1  | 2276717 | 2276322 | 2317130 | 2316735 | 2291894 | 2291499 | 2268672 | 2268277 | 114643  | 115038  | 1446794 | 1446399 | 2304181 | 2303786 | 2060377 | 2059982 | 1117248 | 1116853 | 2114003 | 2113608 |
| 2430 | BPSS2322            | 1  | 2278055 | 2276760 | 2318468 | 2317173 | 2293232 | 2291937 | 2270010 | 2268715 | 113305  | 114600  | 1448132 | 1446837 | 2305519 | 2304224 | 2061715 | 2060420 | 1118586 | 1117291 | 2115341 | 2114046 |
| 2431 | BPSS2323            | 1  | 2278834 | 2278055 | 2319247 | 2318468 | 2294011 | 2293232 | 2270789 | 2270010 | 112526  | 113305  | 1448911 | 1448132 | 2306298 | 2305519 | 2062494 | 2061715 | 1119365 | 1118586 | 2116120 | 2115341 |
| 2432 | BPSS2324            | 1  | 2280318 | 2278894 | 2320731 | 2319307 | 2295495 | 2294071 | 2272273 | 2270849 | 111042  | 112466  | 1450395 | 1448971 | 2307782 | 2306358 | 2063978 | 2062554 | 1120849 | 1119425 | 2117604 | 2116180 |
| 2433 | BPSS2325            | 1  | 2281019 | 2280321 | 2321432 | 2320734 | 2296196 | 2295498 | 2272974 | 2272276 | 110341  | 111039  | 1451096 | 1450398 | 2308483 | 2307785 | 2064679 | 2063981 | 1121550 | 1120852 | 2118305 | 2117607 |
| 2434 | BPSS2326            | 1  | 2282500 | 2281022 | 2322913 | 2321435 | 2297677 | 2296199 | 2274455 | 2272977 | 108857  | 110338  | 1452580 | 1451099 | 2309967 | 2308486 | 2066163 | 2064682 | 1123034 | 1121553 | 2119789 | 2118308 |
| 2435 | BPSS2327            | 1  | 2286645 | 2282527 | 2327494 | 2325938 | 2302590 | 2301028 | 2278610 | 2276979 | 104712  | 108830  | 1456725 | 1452607 | 2314112 | 2309994 | 2070308 | 2066190 | 1127179 | 1123061 | 2123553 | 2122474 |
| 2436 | BPSS2328            | 1  | 2293658 | 2292318 | 2334807 | 2333872 | 2309603 | 2308263 | 2281657 | 2278610 | 97741   | 99081   | 1463609 | 1459494 | 2320972 | 2314112 | 2077216 | 2073077 | 1134078 | 1132738 | 1023    | 1       |
| 2437 | BPSS2329            | 1  | 2295408 | 2293765 | 2336557 | 2334914 | 2311353 | 2309710 | 2287299 | 2285656 | 95991   | 97634   | 1465359 | 1463716 | 2322722 | 2321079 | 2078966 | 2077323 | 1135828 | 1134185 | 2773    | 1130    |
| 2438 | BPSS2330            | 1  | 2296004 | 2298634 | 2337153 | 2339783 | 2311949 | 2314579 | 2287895 | 2290525 | 95395   | 92765   | 1465955 | 1468585 | 2323318 | 2325948 | 2079562 | 2082192 | 1136424 | 1139054 | 3369    | 5999    |
| 2439 | BPSS2331            | 1  | 2298630 | 2299619 | 2339779 | 2340768 | 2314575 | 2315564 | 2290521 | 2291510 | 92769   | 91780   | 1468581 | 1469570 | 2325944 | 2326942 | 2082188 | 2083177 | 1139050 | 1140039 | 5995    | 6984    |
| 2440 | BPSS2332            | 1  | 2300409 | 2299864 | 2341558 | 2341013 | 2316354 | 2315809 | 2292300 | 2291755 | 90990   | 91535   | 1470360 | 1469815 | 2327732 | 2327187 | 2083967 | 2083422 | 1140829 | 1140284 | 7774    | 7229    |
| 2441 | BPSS2333            | 1  | 2301799 | 2300456 | 2342948 | 2341605 | 2317744 | 2316401 | 2293690 | 2292347 | 89600   | 90943   | 1471750 | 1470407 | 2329122 | 2327779 | 2085357 | 2084014 | 1142219 | 1140876 | 9164    | 7821    |
| 2442 | BPSS2334            | 1  | 2302866 | 2301799 | 2344015 | 2342948 | 2318811 | 2317744 | 2294757 | 2293690 | 88533   | 89600   | 1472817 | 1471750 | 2330189 | 2329122 | 2086424 | 2085357 | 1143286 | 1142219 | 10231   | 9164    |
| 2443 | BPSS2335            | 1  | 2303607 | 2302882 | 2344756 | 2344031 | 2319552 | 2318827 | 2295498 | 2294773 | 87792   | 88517   | 1473558 | 1472837 | 2330930 | 2330205 | 2087165 | 2086440 | 1144027 | 1143302 | 10972   | 10247   |
| 2444 | BPSS2336            | 1  | 2304260 | 2303607 | 2345409 | 2344756 | 2320205 | 2319552 | 2296151 | 2295498 | 87139   | 87792   | 1474211 | 1473558 | 2331583 | 2330930 | 2087818 | 2087165 | 1144680 | 1144027 | 11625   | 10972   |
| 2445 | BPSS2337            | 1  | 2305077 | 2304328 | 2346226 | 2345477 | 2321022 | 2320273 | 2296968 | 2296219 | 86322   | 87071   | 1475028 | 1474279 | 2332400 | 2331651 | 2088635 | 2087886 | 1145497 | 1144748 | 12442   | 11693   |
| 2446 | BPSS2338            | 1  | 2306232 | 2305528 | 2347381 | 2346677 | 2322177 | 2321473 | 2298123 | 2297419 | 85167   | 85871   | 1476183 | 1475479 | 2333555 | 2332851 | 2089790 | 2089086 | 1146652 | 1145948 | 13597   | 12893   |
| 2447 | BPSS2339            | 1  | 2308212 | 2306242 | 2349361 | 2347391 | 2324157 | 2322187 | 2300103 | 2298133 | 83187   | 85157   | 1478163 | 1476193 | 2335535 | 2335565 | 2091770 | 2089800 | 1148632 | 1146662 | 15577   | 13607   |
| 2448 | BPSS2340            | 1  | 2309388 | 2308543 | 2350537 | 2349692 | 2325333 | 2324488 | 2301279 | 2300434 | 82011   | 82856   | 1479339 | 1478494 | 2336711 | 2335866 | 2092946 | 2092101 | 1149808 | 1148963 | 16753   | 15908   |
| 2449 | BPSS2341            | 1  | 2309933 | 2310835 | 2351082 | 2351984 | 2325878 | 2326780 | 2302170 | 2302676 | 81466   | 80564   | 1479884 | 1480786 | 2337256 | 2338158 | 2093491 | 2094393 | 1150353 | 1151255 | 17298   | 18200   |
| 2450 | BPSS2342            | 1  | 2311820 | 2310888 | 2352969 | 2352037 | 2327765 | 2326833 | 2303661 | 2302729 | 79579   | 80511   | 1481771 | 1480839 | 2339143 | 2338211 | 2095378 | 2094446 | 1152240 | 1151308 | 19185   | 18253   |
| 2451 | BPSS2343            | 1  | 2312428 | 2311820 | 2353577 | 2352969 | 2328373 | 2327765 | 2304269 | 2303661 | 78971   | 79579   | 1482379 | 1481771 | 2339751 | 2339143 | 2095986 | 2095378 | 1152848 | 1152240 | 19793   | 19185   |
| 2452 | BPSS2344            | 1  | 2312801 | 2312436 | 2353950 | 2353585 | 2328746 | 2328381 | 2304642 | 2304277 | 78598   | 78963   | 1482752 | 1482387 | 2340124 | 2339759 | 2096359 | 2095994 | 1153221 | 1152856 | 20166   | 19801   |
| 2453 | BPSS2345            | 1  | 2313307 | 2315586 | 2354456 | 2356735 | 2329252 | 2331531 | 2305148 | 2306680 | 78092   | 75813   | 1483258 | 1485537 | 2340630 | 2342909 | 2096865 | 2099144 | 1153727 | 1156006 | 20672   | 22951   |
| 2454 | BPSS2346            | 1  | 2316411 | 2315857 |         |         | 2332356 | 2331802 |         |         | 75084   | 75542   | 1486362 | 1485808 | 2343734 | 2343180 | 2099820 | 2099416 | 1156824 | 1156270 | 23769   | 23215   |
| 2455 | BPSS2347            | 1  | 2316775 | 2317377 | 678     | 1280    | 77      | 679     | 2306842 | 2307444 | 148     | 750     | 1486726 | 1487328 | 2344098 | 2344700 | 1789589 | 1788987 | 1157188 | 1157790 | 24133   | 24735   |
| 2456 | BPSS2347a           | 1  | 2317361 | 2317555 | 1264    | 1458    | 663     | 857     | 2307428 | 2307622 | 734     | 928     | 1487312 | 1487506 | 2344684 | 2344878 | 1789003 | 1788809 | 1157774 | 1157968 | 24719   | 24913   |
| 2457 | BPSS2348            | 1  | 2318245 | 2317892 | 2148    | 1795    | 1547    | 1194    | 2308312 | 2307959 | 1618    | 1265    | 1488202 | 1487849 | 2345580 | 2345227 | 1788113 | 1788466 | 1158664 | 1158311 | 25603   | 25250   |
| 2458 | BPSS2349            | 1  | 2318674 | 2319333 | 2577    | 3236    | 1976    | 2635    | 2308741 | 2309    |         |         |         |         |         |         |         |         |         |         |         |         |
