# Supplementary material for: The Early Stage of Bacterial Genome-Reductive Evolution in the Host
Source: PubMed Central journal article supplement (PMC2877748; doi:10.1371/journal.ppat.1000922), 2010-05-27
Supplement: ppat.1000922.s005.pdf [file ppat.1000922.s005.pdf]

Table S3. Specifics of the IS elements IS407 A, ISBma 1, and ISBma 2 in the *B. mallei* strains.

| IS element                                              | Role | Strain      | Strain | position        | homologous IS type |               |                  |                                       |                   |                  |                  |         |       |       |               |
|---------------------------------------------------------|------|-------------|--------|-----------------|--------------------|---------------|------------------|---------------------------------------|-------------------|------------------|------------------|---------|-------|-------|---------------|
| Chromosome 1                                            |      |             |        |                 |                    |               |                  |                                       |                   |                  |                  |         |       |       |               |
| IS 407 A                                                |      |             |        |                 |                    | 5'-ext        | 5'-IR            | orfA                                  | intergenic region | orfB             | 3'-IR            | 3'-ext  | 5'-DR | 3'-DR | Δ duplication |
|                                                         |      |             |        |                 |                    | TGACCTGCCCCCT |                  |                                       | AGGGGGCAGGTCA     |                  |                  |         |       |       |               |
| 2*Chr1_89_IS407A_A                                      | N    | fmh         | 2      | 1003118-1004353 | Chr1 IS407A        | GCCCC         | TGACCTGCCCCCTACA | ATGAAGAAGCGCTTTACGCGCCCGCAAGCCAAACGCG | TGTTGGCC          | AGGGACTTTGCTAGAA | GCGCGGA          | CCAG    | GCGC  | N     |               |
| 7*Chr1_76_IS407A_7*Chr1_84b_IS407A_A                    | D-R  | NCTC_10247  | 7      | 1003311-1004546 | Chr1 IS407A        | CGGGA         | TGACCTGCCCCCTACA | ATGAAGAAGCGCTTTACGCGCCCGCAAGCCAAACGCG | TGTTGGCC          | AGGGACTTTGCTAGAA | GTCGGGC          | GCCG    | GTCG  | N     |               |
| 2*Chr1_91_IS407A_B                                      | N    | fmh         | 2      | 1006858-1008093 | Chr1 IS407A        | GACGC         | TGACCTGCCCCCTACA | ATGAAGAAGCGCTTTACGCGCCCGCAAGCCAAACGCG | TGTTGGCC          | AGGGACTTTGCTAGAA | GTCGACC          | TGTC    | TGTC  | Y     |               |
| 5*Chr1_96_IS407A_5*Chr1_97_IS407A_A                     | D    | ATCC_10399  | 5      | 1008495-1009730 | Chr1 IS407A        | GGCAC         | TGACCTGCCCCCTACA | ATGAAGAAGCGCTTTACGCGCCCGCAAGCCAAACGCG | TGTTGGCC          | AGGGACTTTGCTAGAA | ACCGCCC          | CCCC    | ACCG  | N     |               |
| 3*Chr1_89_IS407A_A                                      | N    | JHU         | 3      | 1011927-1013162 | Chr1 IS407A        | GCCCC         | TGACCTGCCCCCTACA | ATGAAGAAGCGCTTTACGCGCCCGCAAGCCAAACGCG | TGTTGGCC          | AGGGACTTTGCTAGAA | GCGCGGA          | CCAG    | GCGC  | N     |               |
| 3*Chr1_91_IS407A_B                                      | N    | JHU         | 3      | 1015667-1016902 | Chr1 IS407A        | GACGC         | TGACCTGCCCCCTACA | ATGAAGAAGCGCTTTACGCGCCCGCAAGCCAAACGCG | TGTTGGCC          | AGGGACTTTGCTAGAA | GTCGACC          | TGTC    | TGTC  | Y     |               |
| 6*Chr1_126a_IS407A_A                                    | R    | NCTC_10229  | 6      | 1024057-1025292 | Chr1 IS407A        | TGCCG         | TGACCTGCCCCCTACA | ATGAAGAAGCGCTTTACGCGCCCGCAAGCCAAACGCG | TGTTGGCC          | AGGGACTTTGCTAGAA | CCTGCGA          | AAAA    | CCTG  | N     |               |
| 8*Chr1_78_IS407A_A                                      | N    | 2002721280  | 8      | 1024801-1026036 | Chr1 IS407A        | CAGCA         | TGACCTGCCCCCTACA | ATGAAGAAGCGCTTTACGCGCCCGCAAGCCAAACGCG | TGTTGGCC          | AGGGACTTTGCTAGAA | GTAGCTG          | GTAG    | GTAG  | Y     |               |
| 6*Chr1_43b_IS407A_A                                     | D-R  | NCTC_10229  | 6      | 1026593-1027828 | Chr1 IS407A        | AAAAA         | TGACCTGCCCCCTACA | ATGAAGAAGCGCTTTACGCGCCCGCAAGCCAAACGCG | TGTTGGCC          | AGGGACTTTGCTAGAA | CGGGCG           | AAGC    | GCGG  | N     |               |
| 10*Chr1_89_IS407A_A                                     | N    | PRL20       | 10     | 1031797-1033032 | Chr1 IS407A        | GAGCC         | TGACCTGCCCCCTACA | ATGAAGAAGCGCTTTACGCGCCCGCAAGCCAAACGCG | TGTTGGCC          | AGGGACTTTGCTAGAA | CTGGATG          | CGCA    | CTGG  | N     |               |
| 10*Chr1_92_IS407A_C                                     | N    | PRL20       | 10     | 1037784-1039019 | Chr1 IS407A        | CGCGC         | TGACCTGCCCCCTACA | ATGAAGAAGCGCTTTACGCGCCCGCAAGCCAAACGCG | TGTTGGCC          | AGGGACTTTGCTAGAA | TTCTGGC          | TTGC    | TTGC  | Y     |               |
| 2*Chr1_77_IS407A_2*Chr1_94a_IS407A_A                    | D-R  | fmh         | 2      | 1040287-1041522 | Chr1 IS407A        | ATGAT         | TGACCTGCCCCCTACA | ATGAAGAAGCGCTTTACGCGCCCGCAAGCCAAACGCG | TGTTGGCC          | AGGGACTTTGCTAGAA | AACCGAT          | AGGT    | AACC  | N     |               |
| 7*Chr1_71_IS407A_7*Chr1_87a_IS407A_A                    | D-R  | NCTC_10247  | 7      | 1044544-1045779 | Chr1 IS407A        | GAGCG         | TGACCTGCCCCCTACA | ATGAAGAAGCGCTTTACGCGCCCGCAAGCCAAACGCG | TGTTGGCC          | AGGGACTTTGCTAGAA | TCGCTTCT         | GAGC    | TCGC  | N     |               |
| 3*Chr1_77_IS407A_3*Chr1_94a_IS407A_A                    | D-R  | JHU         | 3      | 1049331-1050566 | Chr1 IS407A        | ATGAT         | TGACCTGCCCCCTACA | ATGAAGAAGCGCTTTACGCGCCCGCAAGCCAAACGCG | TGTTGGCC          | AGGGACTTTGCTAGAA | AACCGAT          | AGGT    | AACC  | N     |               |
| 5*Chr1_95_IS407A_A                                      | N    | ATCC_10399  | 5      | 1051433-1052668 | Chr1 IS407A        | GCGCG         | TGACCTGCCCCCTACA | ATGAAGAAGCGCTTTACGCGCCCGCAAGCCAAACGCG | TGTTGGCC          | AGGGACTTTGCTAGAA | GCCCGCC          | GATG    | GCCC  | N     |               |
| 6*Chr1_42b_IS407A_6*Chr1_43a_IS407A_6*Chr1_45b_IS407A_D | D-R  | NCTC_10229  | 6      | 1053882-1055117 | Chr1 IS407A        | GGCCT         | TGACCTGCCCCCTACA | ATGAAGAAGCGCTTTACGCGCCCGCAAGCCAAACGCG | TGTTGGCC          | AGGGACTTTGCTAGAA | GCGGTGC          | TGCG    | GCGG  | N     |               |
| 6*Chr1_136_IS407A_6*Chr1_45a_IS407A_A                   | D-R  | NCTC_10229  | 6      | 1067579-1068814 | Chr1 IS407A        | GATCG         | TGACCTGCCCCCTACA | ATGAAGAAGCGCTTTACGCGCCCGCAAGCCAAACGCG | TGTTGGCC          | AGGGACTTTGCTAGAA | GATGCTC          | GAAC    | GATG  | N     |               |
| 10*Chr1_77_IS407A_10*Chr1_94a_IS407A_A                  | D-R  | PRL20       | 10     | 1068513-1069748 | Chr1 IS407A        | TCAGA         | TGACCTGCCCCCTACA | ATGAAGAAGCGCTTTACGCGCCCGCAAGCCAAACGCG | TGTTGGCC          | AGGGACTTTGCTAGAA | ACCTGTCA         | GGTT    | ACCT  | N     |               |
| 4*Chr1_74_IS407A_4*Chr1_75_IS407A_A                     | D    | gb8_horse_4 | 4      | 1073497-1074418 | Chr1 IS407A        | #ISBma        | ~~~~~            | ~~~~~                                 | GCCCATGCCACGCAGCA | CGAGATG          | AGGGACTTTGCTAGAA | GTCATGC | #     | GGTC  | N.D.          |
| 4*Chr1_76_IS407A_4*Chr1_87b_IS407A_A                    | D-R  | gb8_horse_4 | 4      | 1078636-1079871 | Chr1 IS407A        | CGGGA         | TGACCTGCCCCCTACA | ATGAAGAAGCGCTTTACGCGCCCGCAAGCCAAACGCG | TGTTGGCC          | AGGGACTTTGCTAGAA | CGAGCGC          | GCCG    | CGAG  | N     |               |
| 1*Chr1_74_IS407A_1*Chr1_75_IS407A_A                     | D    | ATCC_23344  | 1      | 1080184-1081105 | Chr1 IS407A        | #ISBma        | ~~~~~            | ~~~~~                                 | GCCCATGCCACGCAGCA | CGAGATG          | AGGGACTTTGCTAGAA | GTCATGC | #     | GGTC  | N.D.          |
| 1*Chr1_76_IS407A_1*Chr1_87b_IS407A_A                    | D-R  | ATCC_23344  | 1      | 1085323-1086558 | Chr1 IS407A        | CGGGA         | TGACCTGCCCCCTACA | ATGAAGAAGCGCTTTACGCGCCCGCAAGCCAAACGCG | TGTTGGCC          | AGGGACTTTGCTAGAA | CGAGCGC          | GCCG    | CGAG  | N     |               |
| 5*Chr1_69_IS407A_5*Chr1_94b_IS407A_A                    | D-R  | ATCC_10399  | 5      | 1109938-1111173 | Chr1 IS407A        | GGCGA         | TGACCTGCCCCCTACA | ATGAAGAAGCGCTTTACGCGCCCGCAAGCCAAACGCG | TGTTGGCC          | AGGGACTTTGCTAGAA | TGACGTTG         | CTGG    | TGAG  | N     |               |
| 4*Chr1_89_IS407A_A                                      | N    | gb8_horse_4 | 4      | 1116480-1117715 | Chr1 IS407A        | GCCCC         | TGACCTGCCCCCTACA | ATGAAGAAGCGCTTTACGCGCCCGCAAGCCAAACGCG | TGTTGGCC          | AGGGACTTTGCTAGAA | GCGCGGA          | CCAG    | GCGC  | N     |               |
| 4*Chr1_91_IS407A_B                                      | N    | gb8_horse_4 | 4      | 1120220-1121455 | Chr1 IS407A        | GACGC         | TGACCTGCCCCCTACA | ATGAAGAAGCGCTTTACGCGCCCGCAAGCCAAACGCG | TGTTGGCC          | AGGGACTTTGCTAGAA | GTCGACC          | TGTC    | TGTC  | Y     |               |
| 1*Chr1_89_IS407A_A                                      | N    | ATCC_23344  | 1      | 1123337-1124572 | Chr1 IS407A        | GCCCC         | TGACCTGCCCCCTACA | ATGAAGAAGCGCTTTACGCGCCCGCAAGCCAAACGCG | TGTTGGCC          | AGGGACTTTGCTAGAA | GTCGACC          | CCAG    | GCGC  | N     |               |
| 1*Chr1_91_IS407A_B                                      | N    | ATCC_23344  | 1      | 1127077-1128312 | Chr1 IS407A        | GACGC         | TGACCTGCCCCCTACA | ATGAAGAAGCGCTTTACGCGCCCGCAAGCCAAACGCG | TGTTGGCC          | AGGGACTTTGCTAGAA | GTCGACC          | TGTC    | TGTC  | Y     |               |
| 8*Chr1_77_IS407A_8*Chr1_94a_IS407A_A                    | D-R  | 2002721280  | 8      | 1132308-1133543 | Chr1 IS407A        | ATGAT         | TGACCTGCCCCCTACA | ATGAAGAAGCGCTTTACGCGCCCGCAAGCCAAACGCG | TGTTGGCC          | AGGGACTTTGCTAGAA | AACCGAT          | AGGT    | AACC  | N     |               |
| 2*Chr1_78_IS407A_2*Chr1_80_IS407A_A                     | D    | fmh         | 2      | 1150542-1151777 | Chr1 IS407A        | GGGAC         | TGACCTGCCCCCTACA | ATGAAGAAGCGCTTTACGCGCCCGCAAGCCAAACGCG | TGTTGGCC          | AGGGACTTTGCTAGAA | GTAGCTG          | GTCA    | GTAG  | N     |               |
| 6*Chr1_71_IS407A_6*Chr1_87a_IS407A_A                    | D-R  | NCTC_10229  | 6      | 115281-116516   | Chr1 IS407A        | GAGCG         | TGACCTGCCCCCTACA | ATGAAGAAGCGCTTTACGCGCCCGCAAGCCAAACGCG | TGTTGGCC          | AGGGACTTTGCTAGAA | TCGCTTCT         | GAGC    | TCGC  | N     |               |
| 4*Chr1_77_IS407A_4*Chr1_94a_IS407A_A                    | D-R  | gb8_horse_4 | 4      | 1153315-1154550 | Chr1 IS407A        | ATGAT         | TGACCTGCCCCCTACA | ATGAAGAAGCGCTTTACGCGCCCGCAAGCCAAACGCG | TGTTGGCC          | AGGGACTTTGCTAGAA | AACCGAT          | AGGT    | AACC  | N     |               |
| 1*Chr1_77_IS407A_1*Chr1_94a_IS407A_A                    | D-R  | ATCC_23344  | 1      | 1160172-1161407 | Chr1 IS407A        | GCAAG         | TGACCTGCCCCCTACA | ATGAAGAAGCGCTTTACGCGCCCGCAAGCCAAACGCG | TGTTGGCC          | AGGGACTTTGCTAGAA | AACCGAT          | AGGT    | AACC  | N     |               |
| 2*Chr1_81_IS407A_B                                      | N    | fmh         | 2      | 1160942-1162177 | Chr1 IS407A        | GCAAG         | TGACCTGCCCCCTACA | ATGAAGAAGCGCTTTACGCGCCCGCAAGCCAAACGCG | TGTTGGCC          | AGGGACTTTGCTAGAA | GGGCCAT          | GGGC    | GGGC  | Y     |               |
| 3*Chr1_78_IS407A_3*Chr1_80_IS407A_A                     | D    | JHU         | 3      | 1161038-1162273 | Chr1 IS407A        | GGGAC         | TGACCTGCCCCCTACA | ATGAAGAAGCGCTTTACGCGCCCGCAAGCCAAACGCG | TGTTGGCC          | AGGGACTTTGCTAGAA | GTAGCTG          | GTCA    | GTAG  | N     |               |
| 7*Chr1_68_IS407A_7*Chr1_69_IS407A_A                     | D    | NCTC_10247  | 7      | 1163594-1164829 | Chr1 IS407A        | CCTAA         | TGACCTGCCCCCTACA | ATGAAGAAGCGCTTTACGCGCCCGCAAGCCAAACGCG | TGTTGGCC          | AGGGACTTTGCTAGAA | CAGTTTGT         | ACGT    | CAGT  | N     |               |
| 8*Chr1_89_IS407A_A                                      | N    | 2002721280  | 8      | 1167906-1169141 | Chr1 IS407A        | GCGAA         | TGACCTGCCCCCTACA | ATGAAGAAGCGCTTTACGCGCCCGCAAGCCAAACGCG | TGTTGGCC          | AGGGACTTTGCTAGAA | CTGGATG          | CCCG    | CTGG  | N     |               |
| 3*Chr1_81_IS407A_B                                      | N    | JHU         | 3      | 1171909-1173144 | Chr1 IS407A        | GCAAG         | TGACCTGCCCCCTACA | ATGAAGAAGCGCTTTACGCGCCCGCAAGCCAAACGCG | TGTTGGCC          | AGGGACTTTGCTAGAA | GGGCCAT          | GGGC    | GGGC  | Y     |               |
| 10*Chr1_78_IS407A_10*Chr1_80_IS407A_A                   | D    | PRL20       | 10     | 1172927-1174162 | Chr1 IS407A        | CAGCA         | TGACCTGCCCCCTACA | ATGAAGAAGCGCTTTACGCGCCCGCAAGCCAAACGCG | TGTTGGCC          | AGGGACTTTGCTAGAA | GTAGCTG          | GTAG    | GTAG  | Y     |               |
| 2*Chr1_83_IS407A_A                                      | N    | fmh         | 2      | 1174009-1175244 | Chr1 IS407A        | CAAGT         | TGACCTGCCCCCTACA | ATGAAGAAGCGCTTTACGCGCCCGCAAGCCAAACGCG | TGTTGGCC          | AGGGACTTTGCTAGAA | ATCAGGC          | GGAT    | ATCA  | N     |               |
| 9*Chr1_64a_IS407A_A                                     | N    | SAVP1       | 9      | 1180766-1182001 | Chr1 IS407A        | CCAGA         | TGACCTGCCCCCTACA | ATGAAGAAGCGCTTTACGCGCCCGCAAGCCAAACGCG | TGTTGGCC          | AGGGACTTTGCTAGAA | TCGCTTCT         | CTTG    | TCGC  | N     |               |
| 5*Chr1_20_IS407A_5*Chr1_21_IS407A_A                     | D    | ATCC_10399  | 5      | 118297-119532   | Chr1 IS407A        | ATGTC         | TGACCTGCCCCCTACA | ATGAAGAAGCGCTTTACGCGCCCGCAAGCCAAACGCG | TGTTGGCC          | AGGGACTTTGCTAGAA | GTCACCG          | CCGG    | GTCC  | N     |               |
| 3*Chr1_83_IS407A_A                                      | N    | JHU         | 3      | 1185197-1186432 | Chr1 IS407A        | CAAGT         | TGACCTGCCCCCTACA | ATGAAGAAGCGCTTTACGCGCCCGCAAGCCAAACGCG | TGTTGGCC          | AGGGACTTTGCTAGAA | ATCAGGC          | GGAT    | ATCA  | N     |               |
| 2*Chr1_84a_IS407A_A                                     | N    | fmh         | 2      | 1189127-1190362 | Chr1 IS407A        | GTCGC         | TGACCTGCCCCCTACA | ATGAAGAAGCGCTTTACGCGCCCGCAAGCCAAACGCG | TGTTGGCC          | AGGGACTTTGCTAGAA | GTCGGGC          | AAAG    | GTCG  | N     |               |
| 10*Chr1_83_IS407A_A                                     | N    | PRL20       | 10     | 1192001-1193236 | Chr1 IS407A        | TTACG         | TGACCTGCCCCCTACA | ATGAAGAAGCGCTTTACGCGCCCGCAAGCCAAACGCG | TGTTGGCC          | AGGGACTTTGCTAGAA | ATCCACCC         | TGAT    | ATCC  | N     |               |
| 3*Chr1_84a_IS407A_A                                     | N    | JHU         | 3      | 1200315-1201550 | Chr1 IS407A        | GTGCC         | TGACCTGCCCCCTACA | ATGAAGAAGCGCTTTACGCGCCCGCAAGCCAAACGCG | TGTTGGCC          | AGGGACTTTGCTAGAA | GTCGGGC          | AAAG    | GTCG  | N     |               |
| 8*Chr1_75_IS407A_A                                      | D-R  | 2002721280  | 8      | 1205181-1206102 | Chr1 IS407A        | #ISBma        | ~~~~~            | ~~~~~                                 | GCCCATGCCACGCAGCA | CGAGATG          | AGGGACTTTGCTAGAA | CCATGGC | #     | CCAT  | N.D.          |
| 10*Chr1_84a_IS407A_A                                    | N    | PRL20       | 10     | 1209165-1210140 | Chr1 IS407A        | CGCGT         | TGACCTGCCCCCTACA | ATGAAGAAGCGCTTTACGCGCCCGCAAGCCAAACGCG | TGTTGGCC          | #                | #contig_br       | CGAC    | #con  | N     |               |
| 8*Chr1_76_IS407A_8*Chr1_84b_IS407A_8*Chr1_87b_IS407A_D  | D-R  | 2002721280  | 8      | 1210321-1211556 | Chr1 IS407A        | CGGGA         | TGACCTGCCCCCTACA | ATGAAGAAGCGCTTTACGCGCCCGCAAGCCAAACGCG | TGTTGGCC          | AGGGACTTTGCTAGAA | GTCGGGC          | GCCG    | GTCG  | N     |               |
| 5*Chr1_71_IS407A_5*Chr1_87a_IS407A_A                    | D-R  | ATCC_10399  | 5      | 1229015-1230250 | Chr1 IS407A        | TTGAT         | TGACCTGCCCCCTACA | ATGAAGAAGCGCTTTACGCGCCCGCAAGCCAAACGCG | TGTTGGCC          | AGGGACTTTGCTAGAA | GCTCGAC          | GCGA    | GCTC  | N     |               |

|                      |                      |     |             |    |                 |      |        |                                                                                                 |      |      |   |
|----------------------|----------------------|-----|-------------|----|-----------------|------|--------|-------------------------------------------------------------------------------------------------|------|------|---|
| 7*Chr1_99_IS407A     | 7*Chr1_67_IS407A_A   | D-R | NCTC_10247  | 7  | 1230358-1231593 | Chr1 | IS407A | TTCATATGACCTGCCCCCTACA ATGAAGAAGCGCTTTACGCGCCCGCAAGCCAAACGCG; TGTTGGCCAGGGACTTTGCTAGAA(GATCGAGI | GTGG | GATC | N |
| 2*Chr1_71_IS407A     | 2*Chr1_87a_IS407A_A  | D-R | fmh         | 2  | 1233629-1234864 | Chr1 | IS407A | TTCGATGACCTGCCCCCTACA ATGAAGAAGCGCTTTACGCGCCCGCAAGCCAAACGCG; TGTTGGCCAGGGACTTTGCTAGAA(GCTCGAC   | GCGA | GCTC | N |
| 4*Chr1_21_IS407A     | 4*Chr1_8_IS407A_A    | D-R | gb8_horse_4 | 4  | 123374-124609   | Chr1 | IS407A | GGCGC TGACCTGCCCCCTACA ATGAAGAAGCGCTTTACGCGCCCGCAAGCCAAACGCG; TGTTGGCCAGGGACTTTGCTAGAA(GTCCACG1 | GACG | GTCC | N |
| 1*Chr1_21_IS407A     | 1*Chr1_8_IS407A_A    | D-R | ATCC_23344  | 1  | 123747-124982   | Chr1 | IS407A | GGGCG TGACCTGCCCCCTACA ATGAAGAAGCGCTTTACGCGCCCGCAAGCCAAACGCG; TGTTGGCCAGGGACTTTGCTAGAA(GTCCACG1 | GACG | GTCC | N |
| 3*Chr1_71_IS407A     | 3*Chr1_87a_IS407A_A  | D-R | JHU         | 3  | 1241561-1242796 | Chr1 | IS407A | TTCGATGACCTGCCCCCTACA ATGAAGAAGCGCTTTACGCGCCCGCAAGCCAAACGCG; TGTTGGCCAGGGACTTTGCTAGAA(GTCCGAC   | GCGA | GCTC | N |
| 9*Chr1_65a_IS407A_A  |                      | N   | SAVP1       | 9  | 1242873-1244108 | Chr1 | IS407A | GCGAC TGACCTGCCCCCTACA ATGAAGAAGCGCTTTACGCGCCCGCAAGCCAAACGCG; TGTTGGCCAGGGACTTTGCTAGAA(GGGGGCA  | GAAT | GGGG | N |
| 10*Chr1_71_IS407A    | 10*Chr1_87a_IS407A_A | D-R | PRL20       | 10 | 1249788-1251023 | Chr1 | IS407A | TTCGATGACCTGCCCCCTACA ATGAAGAAGCGCTTTACGCGCCCGCAAGCCAAACGCG; TGTTGGCCAGGGACTTTGCTAGAA(GCTCGAC   | GCGA | GCTC | N |
| 8*Chr1_71_IS407A     | 8*Chr1_87a_IS407A_A  | D-R | 2002721280  | 8  | 1250846-1252081 | Chr1 | IS407A | GAGCG TGACCTGCCCCCTACA ATGAAGAAGCGCTTTACGCGCCCGCAAGCCAAACGCG; TGTTGGCCAGGGACTTTGCTAGAA(TGCTCTT  | GAGC | TCGC | N |
| 4*Chr1_78_IS407A     | 4*Chr1_80_IS407A_A   | D   | gb8_horse_4 | 4  | 1259592-1260734 | Chr1 | IS407A | GGGAC TGACCTGCCCCCTACA ATGAAGAAGCGCTTTACGCGCCCGCAAGCCAAACGCG; TGTTGGCCAGGGACTTTGCTAGAA(GTAGCTG  | GTCA | GTAG | N |
| 6*Chr1_143a_IS407A_B |                      | N   | NCTC_10229  | 6  | 1262978-1264213 | Chr1 | IS407A | TTCGCTGACCTGCCCCCTACA ATGAAGAAGCGCTTTACGCGCCCGCAAGCCAAACGCG; TGTTGGCCAGGGACTTTGCTAGAA(ATCAAGC   | ATCA | ATCA | Y |
| 1*Chr1_78_IS407A     | 1*Chr1_80_IS407A_A   | D   | ATCC_23344  | 1  | 1267713-1268948 | Chr1 | IS407A | GGGAC TGACCTGCCCCCTACA ATGAAGAAGCGCTTTACGCGCCCGCAAGCCAAACGCG; TGTTGGCCAGGGACTTTGCTAGAA(GTAGCTG  | GTCA | GTAG | N |
| 4*Chr1_81_IS407A_B   |                      | N   | gb8_horse_4 | 4  | 1269471-1270706 | Chr1 | IS407A | GCAAG TGACCTGCCCCCTACA ATGAAGAAGCGCTTTACGCGCCCGCAAGCCAAACGCG; TGTTGGCCAGGGACTTTGCTAGAA(GGGCCAT  | GGGC | GGGC | Y |
| 5*Chr1_84a_IS407A_A  |                      | N   | ATCC_10399  | 5  | 1270273-1271508 | Chr1 | IS407A | GTGCC TGACCTGCCCCCTACA ATGAAGAAGCGCTTTACGCGCCCGCAAGCCAAACGCG; TGTTGGCCAGGGACTTTGCTAGAA(GTCCGGC  | AAAG | GTCC | N |
| 1*Chr1_81_IS407A_B   |                      | N   | ATCC_23344  | 1  | 1277696-1278931 | Chr1 | IS407A | GCAAG TGACCTGCCCCCTACA ATGAAGAAGCGCTTTACGCGCCCGCAAGCCAAACGCG; TGTTGGCCAGGGACTTTGCTAGAA(GGGCCAT  | GGGC | GGGC | Y |
| 4*Chr1_83_IS407A_A   |                      | N   | gb8_horse_4 | 4  | 1282759-1283994 | Chr1 | IS407A | CAAGT TGACCTGCCCCCTACA ATGAAGAAGCGCTTTACGCGCCCGCAAGCCAAACGCG; TGTTGGCCAGGGACTTTGCTAGAA(ATCAGGC  | GGAT | ATCA | N |
| 5*Chr1_83_IS407A_A   |                      | N   | ATCC_10399  | 5  | 1285391-1286626 | Chr1 | IS407A | CAAGT TGACCTGCCCCCTACA ATGAAGAAGCGCTTTACGCGCCCGCAAGCCAAACGCG; TGTTGGCCAGGGACTTTGCTAGAA(ATCAGGC  | GGAT | ATCA | N |
| 1*Chr1_83_IS407A_A   |                      | N   | ATCC_23344  | 1  | 1290984-1292219 | Chr1 | IS407A | CAAGT TGACCTGCCCCCTACA ATGAAGAAGCGCTTTACGCGCCCGCAAGCCAAACGCG; TGTTGGCCAGGGACTTTGCTAGAA(ATCAGGC  | GGAT | ATCA | N |
| 9*Chr1_98_IS407A     | 9*Chr1_66_IS407A_A   | D-R | SAVP1       | 9  | 1293994-1295229 | Chr1 | IS407A | CTCGT TGACCTGCCCCCTACA ATGAAGAAGCGCTTTACGCGCCCGCAAGCCAAACGCG; TGTTGGCCAGGGACTTTGCTAGAA(GTAGGCA  | CCCG | GTAG | N |
| 4*Chr1_84a_IS407A_A  |                      | N   | gb8_horse_4 | 4  | 1297816-1299051 | Chr1 | IS407A | GTGCC TGACCTGCCCCCTACA ATGAAGAAGCGCTTTACGCGCCCGCAAGCCAAACGCG; TGTTGGCCAGGGACTTTGCTAGAA(GTCCGGC  | AAAG | GTCC | N |
| 5*Chr1_81_IS407A_B   |                      | N   | ATCC_10399  | 5  | 1298670-1299905 | Chr1 | IS407A | GCAAG TGACCTGCCCCCTACA ATGAAGAAGCGCTTTACGCGCCCGCAAGCCAAACGCG; TGTTGGCCAGGGACTTTGCTAGAA(GGGCCAT  | GGGC | GGGC | Y |
| 1*Chr1_84a_IS407A_A  |                      | N   | ATCC_23344  | 1  | 1306102-1307337 | Chr1 | IS407A | GTGCC TGACCTGCCCCCTACA ATGAAGAAGCGCTTTACGCGCCCGCAAGCCAAACGCG; TGTTGGCCAGGGACTTTGCTAGAA(GTCCGGC  | AAAG | GTCC | N |
| 5*Chr1_79_IS407A     | 5*Chr1_80_IS407A_A   | D   | ATCC_10399  | 5  | 1308729-1309964 | Chr1 | IS407A | GGGAC TGACCTGCCCCCTACA ATGAAGAAGCGCTTTACGCGCCCGCAAGCCAAACGCG; TGTTGGCCAGGGACTTTGCTAGAA(CAAGCAG  | GTCA | CAAG | N |
| 6*Chr1_145_IS407A_A  |                      | N   | NCTC_10229  | 6  | 1331417-1332652 | Chr1 | IS407A | AAGCC TGACCTGCCCCCTACA ATGAAGAAGCGCTTTACGCGCCCGCAAGCCAAACGCG; TGTTGGCCAGGGACTTTGCTAGAA(GGCTTCG  | ATAG | GGCT | N |
| 4*Chr1_71_IS407A     | 4*Chr1_87a_IS407A_A  | D-R | gb8_horse_4 | 4  | 1338734-1339969 | Chr1 | IS407A | TTCGATGACCTGCCCCCTACA ATGAAGAAGCGCTTTACGCGCCCGCAAGCCAAACGCG; TGTTGGCCAGGGACTTTGCTAGAA(GCTCGAC   | GCGA | GCTC | N |
| 7*Chr1_43b_IS407A_A  |                      | R   | NCTC_10247  | 7  | 134379-135614   | Chr1 | IS407A | AAAAA TGACCTGCCCCCTACA ATGAAGAAGCGCTTTACGCGCCCGCAAGCCAAACGCG; TGTTGGCCAGGGACTTTGCTAGAA(CGGCGCG  | AAGC | CGGG | N |
| 1*Chr1_71_IS407A     | 1*Chr1_87a_IS407A_A  | D-R | ATCC_23344  | 1  | 1347348-1348583 | Chr1 | IS407A | TTCGATGACCTGCCCCCTACA ATGAAGAAGCGCTTTACGCGCCCGCAAGCCAAACGCG; TGTTGGCCAGGGACTTTGCTAGAA(GCTCGAC   | GCGA | GCTC | N |
| 5*Chr1_78_IS407A_A   |                      | N   | ATCC_10399  | 5  | 1351723-1352958 | Chr1 | IS407A | CAGCA TGACCTGCCCCCTACA ATGAAGAAGCGCTTTACGCGCCCGCAAGCCAAACGCG; TGTTGGCCAGGGACTTTGCTAGAA(GTAGCTG  | GTAG | GTAG | Y |
| 9*Chr1_96_IS407A     | 9*Chr1_97_IS407A_A   | D   | SAVP1       | 9  | 1352573-1353808 | Chr1 | IS407A | GGCAC TGACCTGCCCCCTACA ATGAAGAAGCGCTTTACGCGCCCGCAAGCCAAACGCG; TGTTGGCCAGGGACTTTGCTAGAA(ACGGCCC  | CCCC | CCCT | N |
| 2*Chr1_68_IS407A     | 2*Chr1_69_IS407A_A   | D   | fmh         | 2  | 1353867-1355102 | Chr1 | IS407A | CCTAA TGACCTGCCCCCTACA ATGAAGAAGCGCTTTACGCGCCCGCAAGCCAAACGCG; TGTTGGCCAGGGACTTTGCTAGAA(CCAGTTT  | ACGT | CCAG | N |
| 3*Chr1_68_IS407A     | 3*Chr1_69_IS407A_A   | D   | JHU         | 3  | 1363269-1364504 | Chr1 | IS407A | CCTAA TGACCTGCCCCCTACA ATGAAGAAGCGCTTTACGCGCCCGCAAGCCAAACGCG; TGTTGGCCAGGGACTTTGCTAGAA(CCAGTTT  | ACGT | CCAG | N |
| 7*Chr1_126a_IS407A_A |                      | R   | NCTC_10247  | 7  | 136915-138150   | Chr1 | IS407A | TGCCG TGACCTGCCCCCTACA ATGAAGAAGCGCTTTACGCGCCCGCAAGCCAAACGCG; TGTTGGCCAGGGACTTTGCTAGAA(CCTGGCA  | AAAA | CTCT | N |
| 8*Chr1_68_IS407A     | 8*Chr1_69_IS407A_A   | D   | 2002721280  | 8  | 1369943-1371178 | Chr1 | IS407A | CCTAA TGACCTGCCCCCTACA ATGAAGAAGCGCTTTACGCGCCCGCAAGCCAAACGCG; TGTTGGCCAGGGACTTTGCTAGAA(CCAGTTT  | ACGT | CCAG | N |
| 9*Chr1_95_IS407A_A   |                      | N   | SAVP1       | 9  | 1395694-1396929 | Chr1 | IS407A | GGCGC TGACCTGCCCCCTACA ATGAAGAAGCGCTTTACGCGCCCGCAAGCCAAACGCG; TGTTGGCCAGGGACTTTGCTAGAA(GCCCGCC  | GATG | GCCC | N |
| 4*Chr1_10_IS407A_A   |                      | N   | gb8_horse_4 | 4  | 140426-141661   | Chr1 | IS407A | TCCGT TGACCTGCCCCCTACA ATGAAGAAGCGCTTTACGCGCCCGCAAGCCAAACGCG; TGTTGGCCAGGGACTTTGCTAGAA(CCCTATG  | ACAT | CCCT | N |
| 10*Chr1_68_IS407A    | 10*Chr1_72_IS407A_A  | D-R | PRL20       | 10 | 1412924-1414159 | Chr1 | IS407A | CCAGA TGACCTGCCCCCTACA ATGAAGAAGCGCTTTACGCGCCCGCAAGCCAAACGCG; TGTTGGCCAGGGACTTTGCTAGAA(ACGTGTG  | CGCG | ACGT | N |
| 1*Chr1_10_IS407A_A   |                      | N   | ATCC_23344  | 1  | 141323-142558   | Chr1 | IS407A | TCCGT TGACCTGCCCCCTACA ATGAAGAAGCGCTTTACGCGCCCGCAAGCCAAACGCG; TGTTGGCCAGGGACTTTGCTAGAA(CCCTATG  | ACAT | CCCT | N |
| 3*Chr1_10_IS407A_A   |                      | N   | JHU         | 3  | 14148-15383     | Chr1 | IS407A | TCCGT TGACCTGCCCCCTACA ATGAAGAAGCGCTTTACGCGCCCGCAAGCCAAACGCG; TGTTGGCCAGGGACTTTGCTAGAA(CCCTATG  | ACAT | CCCT | N |
| 2*Chr1_99_IS407A     | 2*Chr1_67_IS407A_A   | D-R | fmh         | 2  | 1420660-1421895 | Chr1 | IS407A | TTCATATGACCTGCCCCCTACA ATGAAGAAGCGCTTTACGCGCCCGCAAGCCAAACGCG; TGTTGGCCAGGGACTTTGCTAGAA(GATCGAGI | GTGG | GATC | N |
| 3*Chr1_99_IS407A     | 3*Chr1_67_IS407A_A   | D-R | JHU         | 3  | 1430062-1431297 | Chr1 | IS407A | TTCATATGACCTGCCCCCTACA ATGAAGAAGCGCTTTACGCGCCCGCAAGCCAAACGCG; TGTTGGCCAGGGACTTTGCTAGAA(GATCGAGI | GTGG | GATC | N |
| 8*Chr1_99_IS407A     | 8*Chr1_67_IS407A_A   | D-R | 2002721280  | 8  | 1436504-1437739 | Chr1 | IS407A | TTCATATGACCTGCCCCCTACA ATGAAGAAGCGCTTTACGCGCCCGCAAGCCAAACGCG; TGTTGGCCAGGGACTTTGCTAGAA(ACGTGAT  | GTGG | ACTT | N |
| 8*Chr1_10_IS407A_A   |                      | N   | 2002721280  | 8  | 14396-15631     | Chr1 | IS407A | CGCCA TGACCTGCCCCCTACA ATGAAGAAGCGCTTTACGCGCCCGCAAGCCAAACGCG; TGTTGGCCAGGGACTTTGCTAGAA(CCTATG   | CCCT | CCCT | Y |
| 9*Chr1_75_IS407A     | 9*Chr1_94b_IS407A_A  | D-R | SAVP1       | 9  | 1454166-1455087 | Chr1 | IS407A | #ISBma~~~~~ GCCCATGCCACGAGCA(CGAGATG)AGGGACTTTGCTAGAA(ACGTGTGCT #                               | ACGT | N.D. |   |
| 4*Chr1_68_IS407A     | 4*Chr1_69_IS407A_A   | D   | gb8_horse_4 | 4  | 1456856-1458091 | Chr1 | IS407A | CCTAA TGACCTGCCCCCTACA ATGAAGAAGCGCTTTACGCGCCCGCAAGCCAAACGCG; TGTTGGCCAGGGACTTTGCTAGAA(CCAGTTT  | ACGT | CCAG | N |
| 2*Chr1_10_IS407A_A   |                      | N   | fmh         | 2  | 14571-15806     | Chr1 | IS407A | TCCGT TGACCTGCCCCCTACA ATGAAGAAGCGCTTTACGCGCCCGCAAGCCAAACGCG; TGTTGGCCAGGGACTTTGCTAGAA(CCCTATG  | ACAT | CCCT | N |
| 5*Chr1_77_IS407A     | 5*Chr1_94a_IS407A_A  | D-R | ATCC_10399  | 5  | 1459172-1460407 | Chr1 | IS407A | ATGAT TGACCTGCCCCCTACA ATGAAGAAGCGCTTTACGCGCCCGCAAGCCAAACGCG; TGTTGGCCAGGGACTTTGCTAGAA(AACGGAT  | AGGT | AACC | N |
| 9*Chr1_76_IS407A     | 9*Chr1_87b_IS407A_A  | D-R | SAVP1       | 9  | 1459306-1460541 | Chr1 | IS407A | AATGT TGACCTGCCCCCTACA ATGAAGAAGCGCTTTACGCGCCCGCAAGCCAAACGCG; TGTTGGCCAGGGACTTTGCTAGAA(CGGCAGC  | CTCG | CGGC | N |
| 9*Chr1_158_IS407A_A  |                      | D-R | SAVP1       | 9  | 14627-15862     | Chr1 | IS407A | AGCGA TGACCTGCCCCCTACA ATGAAGAAGCGCTTTACGCGCCCGCAAGCCAAACGCG; TGTTGGCCAGGGACTTTGCTAGAA(AATCCAC  | TGTT | AATC | N |
| 1*Chr1_68_IS407A     | 1*Chr1_69_IS407A_A   | D   | ATCC_23344  | 1  | 1466275-1467510 | Chr1 | IS407A | CCTAA TGACCTGCCCCCTACA ATGAAGAAGCGCTTTACGCGCCCGCAAGCCAAACGCG; TGTTGGCCAGGGACTTTGCTAGAA(CCGATTT  | ACGT | CCAG | N |
| 5*Chr1_10_IS407A_A   |                      | N   | ATCC_10399  | 5  | 14735-15970     | Chr1 | IS407A | CGCCA TGACCTGCCCCCTACA ATGAAGAAGCGCTTTACGCGCCCGCAAGCCAAACGCG; TGTTGGCCAGGGACTTTGCTAGAA(CCCTATG  | CCCT | CCCT | Y |
| 10*Chr1_99_IS407A    | 10*Chr1_67_IS407A_A  | D-R | PRL20       | 10 | 1479698-1480933 | Chr1 | IS407A | TTCATATGACCTGCCCCCTACA ATGAAGAAGCGCTTTACGCGCCCGCAAGCCAAACGCG; TGTTGGCCAGGGACTTTGCTAGAA(GATCGAGI | GTGG | GATC | N |
| 5*Chr1_91_IS407A_B   |                      | N   | ATCC_10399  | 5  | 1492267-1493502 | Chr1 | IS407A | GAGCG TGACCTGCCCCCTACA ATGAAGAAGCGCTTTACGCGCCCGCAAGCCAAACGCG; TGTTGGCCAGGGACTTTGCTAGAA(GTGCAGC  | TGTC | GTCT | Y |
| 5*Chr1_91_IS407A_A   |                      | N   | ATCC_10399  | 5  | 1496007-1497242 | Chr1 | IS407A | GCCCC TGACCTGCCCCCTACA ATGAAGAAGCGCTTTACGCGCCCGCAAGCCAAACGCG; TGTTGGCCAGGGACTTTGCTAGAA(GGCGCGG  | CCAG | GGGC | N |
| 9*Chr1_89_IS407A_A   |                      | N   | SAVP1       | 9  | 1497321-1498556 | Chr1 | IS407A | GAGCC TGACCTGCCCCCTACA ATGAAGAAGCGCTTTACGCGCCCGCAAGCCAAACGCG; TGTTGGCCAGGGACTTTGCTAGAA(CTGGATG  | CGCA | CTGG | N |
| 9*Chr1_93_IS407A_C   |                      | N   | SAVP1       | 9  | 1503308-1504543 | Chr1 | IS407A | CGCGC TGACCTGCCCCCTACA ATGAAGAAGCGCTTTACGCGCCCGCAAGCCAAACGCG; TGTTGGCCAGGGACTTTGCTAGAA(TTCGTGCC | TTCC | TTCC | Y |
| 4*Chr1_99_IS407A     | 4*Chr1_67_IS407A_A   | D-R | gb8_horse_4 | 4  | 1523634-1524869 | Chr1 | IS407A | TTCATATGACCTGCCCCCTACA ATGAAGAAGCGCTTTACGCGCCCGCAAGCCAAACGCG; TGTTGGCCAGGGACTTTGCTAGAA(GATCGAGI | GTGG | GATC | N |
| 1*Chr1_99_IS407A     | 1*Chr1_67_IS407A_A   | D-R | ATCC_23344  | 1  | 1533068-1534303 | Chr1 | IS407A | TTCATATGACCTGCCCCCTACA ATGAAGAAGCGCTTTACGCGCCCGCAAGCCAAACGCG; TGTTGGCCAGGGACTTTGCTAGAA(GATCGAGI | GTGG | GATC | N |
| 5*Chr1_76_IS407A     | 5*Chr1_87b_IS407A_A  | D-R | ATCC_10399  | 5  | 1534024-1535259 | Chr1 | IS407A | CGGGA TGACCTGCCCCCTACA ATGAAGAAGCGCTTTACGCGCCCGCAAGCCAAACGCG; TGTTGGCCAGGGACTTTGCTAGAA(CGAGGCG  | GCCC | CGAG | N |
| 9*Chr1_77_IS407A     | 9*Chr1_94a_IS407A_A  | D-R | SAVP1       | 9  | 1534145-1535380 | Chr1 | IS407A | ATGAT TGACCTGCCCCCTACA ATGAAGAAGCGCTTTACGCGCCCGCAAGCCAAACGCG; TGTTGGCCAGGGACTTTGCTAGAA(AACCGAT  | AGGT | AACC | N |

|                     |                      |      |             |    |                 |      |        |        |                   |                    |                    |          |                  |          |      |
|---------------------|----------------------|------|-------------|----|-----------------|------|--------|--------|-------------------|--------------------|--------------------|----------|------------------|----------|------|
| 5*Chr1_74_IS407A    | 5*Chr1_75_IS407A_A   | D    | ATCC_10399  | 5  | 1539476-1540397 | Chr1 | IS407A | #ISBma | GCCCATGCCACGACGAC | CGAGATG            | AGGGACTTTGCTAGAA   | GGTCA    | #                | GGTC     | N.D. |
| 7*Chr1_111_IS407A   | 7*Chr1_56_IS407A_A   | D-R  | NCTC_10247  | 7  | 1544024-1545259 | Chr1 | IS407A | TGGAA  | TGACCTGCCCCCTACA  | ATGAAGAAGCGCTTTACG | GCCCGCAAGCCAAACGCG | TGTTGGCC | AGGGACTTTGCTAGAA | CAGGCGC  | GCGG |
| 7*Chr1_54_IS407A    | 7*Chr1_55_IS407A_A   | D    | NCTC_10247  | 7  | 1557548-1558783 | Chr1 | IS407A | ATCAC  | TGACCTGCCCCCTACA  | ATGAAGAAGCGCTTTACG | GCCCGCAAGCCAAACGCG | TGTTGGCC | AGGGACTTTGCTAGAA | GCGGGTC  | CGCT |
| 6*Chr1_162_IS407A   | 6*Chr1_29_IS407A_A   | D-R  | NCTC_10229  | 6  | 1564428-1565663 | Chr1 | IS407A | ATTTAT | TGACCTGCCCCCTACA  | ATGAAGAAGCGCTTTACG | GCCCGCAAGCCAAACGCG | TGTTGGCC | AGGGACTTTGCTAGAA | ATCAGCA  | CATT |
| 6*Chr1_75_IS407A    | 6*Chr1_84b_IS407A_A  | D-R  | NCTC_10229  | 6  | 156544-157465   | Chr1 | IS407A | #ISBma | GCCCATGCCACGACGAC | CGAGATG            | AGGGACTTTGCTAGAA   | GTCGGGC  | #                | GTCC     | N.D. |
| 3*Chr1_33_IS407A    | 3*Chr1_34_IS407A_A   | D    | JHU         | 3  | 157735-158970   | Chr1 | IS407A | CCGCA  | TGACCTGCCCCCTACA  | ATGAAGAAGCGCTTTACG | GCCCGCAAGCCAAACGCG | TGTTGGCC | AGGGACTTTGCTAGAA | GCAACGG  | CAAT |
| 2*Chr1_33_IS407A    | 2*Chr1_34_IS407A_A   | D    | fmh         | 2  | 157737-158972   | Chr1 | IS407A | CCGCA  | TGACCTGCCCCCTACA  | ATGAAGAAGCGCTTTACG | GCCCGCAAGCCAAACGCG | TGTTGGCC | AGGGACTTTGCTAGAA | GCAACGG  | CAAT |
| 8*Chr1_33_IS407A    | 8*Chr1_35a_IS407A_A  | D-R  | 2002721280  | 8  | 158042-159277   | Chr1 | IS407A | CCGCA  | TGACCTGCCCCCTACA  | ATGAAGAAGCGCTTTACG | GCCCGCAAGCCAAACGCG | TGTTGGCC | AGGGACTTTGCTAGAA | GCGGGCAG | CAAT |
| 6*Chr1_76_IS407A    | 6*Chr1_87b_IS407A_A  | D-R  | NCTC_10229  | 6  | 161685-162920   | Chr1 | IS407A | CGGGA  | TGACCTGCCCCCTACA  | ATGAAGAAGCGCTTTACG | GCCCGCAAGCCAAACGCG | TGTTGGCC | AGGGACTTTGCTAGAA | CCATGGC  | GCCG |
| 5*Chr1_68_IS407A    | 5*Chr1_72_IS407A_A   | D-R  | ATCC_10399  | 5  | 1619910-1621145 | Chr1 | IS407A | CCAGA  | TGACCTGCCCCCTACA  | ATGAAGAAGCGCTTTACG | GCCCGCAAGCCAAACGCG | TGTTGGCC | AGGGACTTTGCTAGAA | TGACGTT  | CGCG |
| 9*Chr1_27_IS407A_B  |                      | N    | SAVP1       | 9  | 162059-163294   | Chr1 | IS407A | ATGGG  | TGACCTGCCCCCTACA  | ATGAAGAAGCGCTTTACG | GCCCGCAAGCCAAACGCG | TGTTGGCC | AGGGACTTTGCTAGAA | GTCGGCC  | GGTG |
| 5*Chr1_18b_IS407A   | 5*Chr1_30_IS407A_A   | D-R  | ATCC_10399  | 5  | 163047-164282   | Chr1 | IS407A | CGTGC  | TGACCTGCCCCCTACA  | ATGAAGAAGCGCTTTACG | GCCCGCAAGCCAAACGCG | TGTTGGCC | AGGGACTTTGCTAGAA | GCCCGCA  | CACC |
| 9*Chr1_78_IS407A_A  |                      | N    | SAVP1       | 9  | 1641740-1642975 | Chr1 | IS407A | CAGCA  | TGACCTGCCCCCTACA  | ATGAAGAAGCGCTTTACG | GCCCGCAAGCCAAACGCG | TGTTGGCC | AGGGACTTTGCTAGAA | GTAGCTGC | GTAG |
| 7*Chr1_112_IS407A   | 7*Chr1_49_IS407A_A   | D-R  | NCTC_10247  | 7  | 1661173-1662408 | Chr1 | IS407A | GCCCT  | TGACCTGCCCCCTACA  | ATGAAGAAGCGCTTTACG | GCCCGCAAGCCAAACGCG | TGTTGGCC | AGGGACTTTGCTAGAA | TTGACGC  | GCCC |
| 6*Chr1_160a_IS407A  | 6*Chr1_161_IS407A_A  | D-R  | NCTC_10229  | 6  | 1685235-1686470 | Chr1 | IS407A | TACGA  | TGACCTGCCCCCTACA  | ATGAAGAAGCGCTTTACG | GCCCGCAAGCCAAACGCG | TGTTGGCC | AGGGACTTTGCTAGAA | GTCGGGG  | TTTT |
| 9*Chr1_79_IS407A    | 9*Chr1_80_IS407A_A   | D    | SAVP1       | 9  | 1685609-1686844 | Chr1 | IS407A | GGGAC  | TGACCTGCCCCCTACA  | ATGAAGAAGCGCTTTACG | GCCCGCAAGCCAAACGCG | TGTTGGCC | AGGGACTTTGCTAGAA | CAAGCAG  | GTCA |
| 5*Chr1_99_IS407A    | 5*Chr1_67_IS407A_A   | D-R  | ATCC_10399  | 5  | 1686724-1687959 | Chr1 | IS407A | TTCAT  | TGACCTGCCCCCTACA  | ATGAAGAAGCGCTTTACG | GCCCGCAAGCCAAACGCG | TGTTGGCC | AGGGACTTTGCTAGAA | GATCGAG  | GTGG |
| 9*Chr1_83_IS407A_A  |                      | N    | SAVP1       | 9  | 1707634-1708869 | Chr1 | IS407A | TTACG  | TGACCTGCCCCCTACA  | ATGAAGAAGCGCTTTACG | GCCCGCAAGCCAAACGCG | TGTTGGCC | AGGGACTTTGCTAGAA | ATCCACC  | TGAT |
| 9*Chr1_84a_IS407A_A |                      | N    | SAVP1       | 9  | 1722752-1723987 | Chr1 | IS407A | GTGCC  | TGACCTGCCCCCTACA  | ATGAAGAAGCGCTTTACG | GCCCGCAAGCCAAACGCG | TGTTGGCC | AGGGACTTTGCTAGAA | GTCGGGC  | AAAG |
| 7*Chr1_113_IS407A_A |                      | N    | NCTC_10247  | 7  | 1731002-1732237 | Chr1 | IS407A | TTTGT  | TGACCTGCCCCCTACA  | ATGAAGAAGCGCTTTACG | GCCCGCAAGCCAAACGCG | TGTTGGCC | AGGGACTTTGCTAGAA | ATCTACT  | CCTC |
| 9*Chr1_86_IS407A_C  |                      | N    | SAVP1       | 9  | 1733018-1734253 | Chr1 | IS407A | CGCGT  | TGACCTGCCCCCTACA  | ATGAAGAAGCGCTTTACG | GCCCGCAAGCCAAACGCG | TGTTGGCC | AGGGACTTTGCTAGAA | GTCGCCG  | GTCC |
| 2*Chr1_111_IS407A   | 2*Chr1_64a_IS407A_A  | D-R  | fmh         | 2  | 1740034-1741269 | Chr1 | IS407A | CTTGT  | TGACCTGCCCCCTACA  | ATGAAGAAGCGCTTTACG | GCCCGCAAGCCAAACGCG | TGTTGGCC | AGGGACTTTGCTAGAA | CTGCTGC  | TCGC |
| 7*Chr1_114_IS407A_A |                      | N    | NCTC_10247  | 7  | 1744605-1745840 | Chr1 | IS407A | TGATT  | TGACCTGCCCCCTACA  | ATGAAGAAGCGCTTTACG | GCCCGCAAGCCAAACGCG | TGTTGGCC | AGGGACTTTGCTAGAA | GATCCGG  | GAAG |
| 10*Chr1_20_IS407A   | 10*Chr1_21_IS407A_A  | D    | RL20        | 10 | 174762-175997   | Chr1 | IS407A | ATGTC  | TGACCTGCCCCCTACA  | ATGAAGAAGCGCTTTACG | GCCCGCAAGCCAAACGCG | TGTTGGCC | AGGGACTTTGCTAGAA | GTCACCA  | CCGG |
| 6*Chr1_149_IS407A   | 6*Chr1_160b_IS407A_A | D-R  | NCTC_10229  | 6  | 1749741-1750976 | Chr1 | IS407A | CGCGC  | TGACCTGCCCCCTACA  | ATGAAGAAGCGCTTTACG | GCCCGCAAGCCAAACGCG | TGTTGGCC | AGGGACTTTGCTAGAA | CCTCACG  | GTCC |
| 8*Chr1_111_IS407A   | 8*Chr1_56_IS407A_A   | D-R  | 2002721280  | 8  | 1749933-1751168 | Chr1 | IS407A | TGGAA  | TGACCTGCCCCCTACA  | ATGAAGAAGCGCTTTACG | GCCCGCAAGCCAAACGCG | TGTTGGCC | AGGGACTTTGCTAGAA | CAGGCGC  | GCGG |
| 3*Chr1_35a_IS407A_A |                      | N    | JHU         | 3  | 175095-176330   | Chr1 | IS407A | GTGAA  | TGACCTGCCCCCTACA  | ATGAAGAAGCGCTTTACG | GCCCGCAAGCCAAACGCG | TGTTGGCC | AGGGACTTTGCTAGAA | CCGGAAC  | GATT |
| 2*Chr1_35a_IS407A_A |                      | N    | fmh         | 2  | 175097-176332   | Chr1 | IS407A | TGAA   | TGACCTGCCCCCTACA  | ATGAAGAAGCGCTTTACG | GCCCGCAAGCCAAACGCG | TGTTGGCC | AGGGACTTTGCTAGAA | CCGGAAC  | GATT |
| 3*Chr1_111_IS407A   | 3*Chr1_64a_IS407A_A  | D-R  | JHU         | 3  | 1752139-1753374 | Chr1 | IS407A | CTTGT  | TGACCTGCCCCCTACA  | ATGAAGAAGCGCTTTACG | GCCCGCAAGCCAAACGCG | TGTTGGCC | AGGGACTTTGCTAGAA | CTGCTGC  | TCGC |
| 8*Chr1_34_IS407A    | 8*Chr1_35b_IS407A_A  | D-R  | 2002721280  | 8  | 176042-177277   | Chr1 | IS407A | GTGAA  | TGACCTGCCCCCTACA  | ATGAAGAAGCGCTTTACG | GCCCGCAAGCCAAACGCG | TGTTGGCC | AGGGACTTTGCTAGAA | GGGGAT   | GATT |
| 8*Chr1_54_IS407A    | 8*Chr1_55_IS407A_A   | D    | 2002721280  | 8  | 1763457-1764692 | Chr1 | IS407A | ATCAC  | TGACCTGCCCCCTACA  | ATGAAGAAGCGCTTTACG | GCCCGCAAGCCAAACGCG | TGTTGGCC | AGGGACTTTGCTAGAA | GTCGGTC  | GCGT |
| 9*Chr1_71_IS407A    | 9*Chr1_87a_IS407A_A  | D-R  | SAVP1       | 9  | 1765215-1766450 | Chr1 | IS407A | TTGCA  | TGACCTGCCCCCTACA  | ATGAAGAAGCGCTTTACG | GCCCGCAAGCCAAACGCG | TGTTGGCC | AGGGACTTTGCTAGAA | GCTCGAC  | GCGA |
| 6*Chr1_158_IS407A_A |                      | D-R  | NCTC_10229  | 6  | 1794681-1795916 | Chr1 | IS407A | AACCC  | TGACCTGCCCCCTACA  | ATGAAGAAGCGCTTTACG | GCCCGCAAGCCAAACGCG | TGTTGGCC | AGGGACTTTGCTAGAA | ATCCACT  | ATGG |
| 10*Chr1_111_IS407A  | 10*Chr1_53a_IS407A_B | D-R  | RL20        | 10 | 1798541-1799776 | Chr1 | IS407A | GAAGG  | TGACCTGCCCCCTACA  | ATGAAGAAGCGCTTTACG | GCCCGCAAGCCAAACGCG | TGTTGGCC | AGGGACTTTGCTAGAA | CTGCTGC  | ACGG |
| 7*Chr1_115a_IS407A  | 7*Chr1_132b_IS407A_A | R    | NCTC_10247  | 7  | 1815700-1816935 | Chr1 | IS407A | TTGCT  | TGACCTGCCCCCTACA  | ATGAAGAAGCGCTTTACG | GCCCGCAAGCCAAACGCG | TGTTGGCC | AGGGACTTTGCTAGAA | GGACGGG  | GATG |
| 2*Chr1_61_IS407A_B  |                      | N    | fmh         | 2  | 1821443-1822678 | Chr1 | IS407A | TTTGT  | TGACCTGCCCCCTACA  | ATGAAGAAGCGCTTTACG | GCCCGCAAGCCAAACGCG | TGTTGGCC | AGGGACTTTGCTAGAA | CCCGCAC  | CCCC |
| 7*Chr1_122_IS407A_A |                      | N    | NCTC_10247  | 7  | 182349-183584   | Chr1 | IS407A | GCGCA  | TGACCTGCCCCCTACA  | ATGAAGAAGCGCTTTACG | GCCCGCAAGCCAAACGCG | TGTTGGCC | AGGGACTTTGCTAGAA | GTGCTGC  | GAAG |
| 3*Chr1_61_IS407A_B  |                      | N    | JHU         | 3  | 1835549-1836784 | Chr1 | IS407A | TTTGT  | TGACCTGCCCCCTACA  | ATGAAGAAGCGCTTTACG | GCCCGCAAGCCAAACGCG | TGTTGGCC | AGGGACTTTGCTAGAA | CCCGCAC  | CCCC |
| 4*Chr1_111_IS407A   | 4*Chr1_64a_IS407A_A  | D-R  | gb8_horse_4 | 4  | 1838521-1839756 | Chr1 | IS407A | CTTGT  | TGACCTGCCCCCTACA  | ATGAAGAAGCGCTTTACG | GCCCGCAAGCCAAACGCG | TGTTGGCC | AGGGACTTTGCTAGAA | CTGCTGC  | TCGC |
| 1*Chr1_111_IS407A   | 1*Chr1_64a_IS407A_A  | D-R  | ATCC_23344  | 1  | 1849090-1850325 | Chr1 | IS407A | CTTGT  | TGACCTGCCCCCTACA  | ATGAAGAAGCGCTTTACG | GCCCGCAAGCCAAACGCG | TGTTGGCC | AGGGACTTTGCTAGAA | CTGCTGC  | TCGC |
| 6*Chr1_150_IS407A   | 6*Chr1_5_IS407A_A    | D-R  | NCTC_10229  | 6  | 1857854-1859089 | Chr1 | IS407A | ATCGC  | TGACCTGCCCCCTACA  | ATGAAGAAGCGCTTTACG | GCCCGCAAGCCAAACGCG | TGTTGGCC | AGGGACTTTGCTAGAA | GTCGGCC  | CAAG |
| 8*Chr1_112_IS407A   | 8*Chr1_49_IS407A_A   | D-R  | 2002721280  | 8  | 1867070-1868305 | Chr1 | IS407A | GCCCT  | TGACCTGCCCCCTACA  | ATGAAGAAGCGCTTTACG | GCCCGCAAGCCAAACGCG | TGTTGGCC | AGGGACTTTGCTAGAA | TTGACGC  | GCCC |
| 9*Chr1_68_IS407A    | 9*Chr1_69_IS407A_A   | D    | SAVP1       | 9  | 1884073-1885308 | Chr1 | IS407A | CCTAA  | TGACCTGCCCCCTACA  | ATGAAGAAGCGCTTTACG | GCCCGCAAGCCAAACGCG | TGTTGGCC | AGGGACTTTGCTAGAA | ATCAGCC  | ACGT |
| 7*Chr1_134_IS407A_B |                      | N    | NCTC_10247  | 7  | 1892663-1893898 | Chr1 | IS407A | CCTAT  | TGACCTGCCCCCTACA  | ATGAAGAAGCGCTTTACG | GCCCGCAAGCCAAACGCG | TGTTGGCC | AGGGACTTTGCTAGAA | GCAAGCC  | GCAC |
| 6*Chr1_2a_IS407A_A  |                      | null | NCTC_10229  | 6  | 1904335-1905570 | Chr1 | IS407A | GATGC  | TGACCTGCCCCCTACA  | ATGAAGAAGCGCTTTACG | GCCCGCAAGCCAAACGCG | TGTTGGCC | AGGGACTTTGCTAGAA | AGCAGCT  | GACG |
| 4*Chr1_61_IS407A_B  |                      | N    | gb8_horse_4 | 4  | 1918701-1919936 | Chr1 | IS407A | TTTGT  | TGACCTGCCCCCTACA  | ATGAAGAAGCGCTTTACG | GCCCGCAAGCCAAACGCG | TGTTGGCC | AGGGACTTTGCTAGAA | CCCGCAC  | CCCC |
| 7*Chr1_126b_IS407A  | 7*Chr1_135_IS407A_A  | D-R  | NCTC_10247  | 7  | 1927000-1928235 | Chr1 | IS407A | CTGGA  | TGACCTGCCCCCTACA  | ATGAAGAAGCGCTTTACG | GCCCGCAAGCCAAACGCG | TGTTGGCC | AGGGACTTTGCTAGAA | CCGGAAG  | ATCG |
| 1*Chr1_61_IS407A_B  |                      | N    | ATCC_23344  | 1  | 1930663-1931898 | Chr1 | IS407A | TTTGT  | TGACCTGCCCCCTACA  | ATGAAGAAGCGCTTTACG | GCCCGCAAGCCAAACGCG | TGTTGGCC | AGGGACTTTGCTAGAA | CCCGCAC  | CCCC |
| 6*Chr1_152a_IS407A  | 6*Chr1_154a_IS407A_A | R    | NCTC_10229  | 6  | 1936574-1937809 | Chr1 | IS407A | CGCAG  | TGACCTGCCCCCTACA  | ATGAAGAAGCGCTTTACG | GCCCGCAAGCCAAACGCG | TGTTGGCC | AGGGACTTTGCTAGAA | GGGACGC  | CTGT |
| 8*Chr1_113_IS407A_A |                      | N    | 2002721280  | 8  | 1937018-1938253 | Chr1 | IS407A | TTTGT  | TGACCTGCCCCCTACA  | ATGAAGAAGCGCTTTACG | GCCCGCAAGCCAAACGCG | TGTTGGCC | AGGGACTTTGCTAGAA | ATCTACT  | CCTC |
| 2*Chr1_48_IS407A    | 2*Chr1_58b_IS407A_A  | D-R  | fmh         | 2  | 1944299-1945534 | Chr1 | IS407A | CTGCG  | TGACCTGCCCCCTACA  | ATGAAGAAGCGCTTTACG | GCCCGCAAGCCAAACGCG | TGTTGGCC | AGGGACTTTGCTAGAA | GAAAGTG  | GTGA |
| 8*Chr1_114_IS407A_A |                      | N    | 2002721280  | 8  | 1950627-1951862 | Chr1 | IS407A | TGATT  | TGACCTGCCCCCTACA  | ATGAAGAAGCGCTTTACG | GCCCGCAAGCCAAACGCG | TGTTGGCC | AGGGACTTTGCTAGAA | GATCCGG  | GAAG |
| 9*Chr1_99_IS407A    | 9*Chr1_67_IS407A_A   | D-R  | SAVP1       | 9  | 1950881-1952116 | Chr1 | IS407A | TTCAT  | TGACCTGCCCCCTACA  | ATGAAGAAGCGCTTTACG | GCCCGCAAGCCAAACGCG | TGTTGGCC | AGGGACTTTGCTAGAA | GATCGAG  | GTGG |
| 3*Chr1_48_IS407A    | 3*Chr1_58b_IS407A_A  | D-R  | JHU         | 3  | 1959751-1960986 | Chr1 | IS407A | CGTGC  | TGACCTGCCCCCTACA  | ATGAAGAAGCGCTTTACG | GCCCGCAAGCCAAACGCG | TGTTGGCC | AGGGACTTTGCTAGAA | GAAAGTG  | GTGA |
| 2*Chr1_132b_IS407A  | 2*Chr1_47b_IS407A_A  | R    | fmh         | 2  | 1963199-1964434 | Chr1 | IS407A | TGAGG  | TGACCTGCCCCCTACA  | ATGAAGAAGCGCTTTACG | GCCCGCAAGCCAAACGCG | TGTTGGCC | AGGGACTTTGCTAGAA | GGACGGG  | CCTT |
| 3*Chr1_132b_IS407A  | 3*Chr1_47b_IS407A_A  | R    | JHU         | 3  | 1978651-1979886 | Chr1 | IS407A | TGAGG  | TGACCTGCCCCCTACA  | ATGAAGAAGCGCTTTACG | GCCCGCAAGCCAAACGCG | TGTTGGCC | AGGGACTTTGCTAGAA | GGACGGG  | CCTT |
| 6*Chr1_152b_IS407A  | 6*Chr1_157_IS407A_A  | D-R  | NCTC_10229  | 6  | 1984096-1985331 | Chr1 | IS407A | GAAAC  | TGACCTGCCCCCTACA  | ATGAAGAAGCGCTTTACG | GCCCGCAAGCCAAACGCG | TGTTGGCC | AGGGACTTTGCTAGAA | GATGCCT  | GGTC |
| 6*Chr1_89_IS407A_A  |                      | N    | NCTC_10229  | 6  | 198950-200185   | Chr1 | IS407A | GCGAA  | TGACCTGCCCCCTACA  | ATGAAGAAGCGCTTTACG | GCCCGCAAGCCAAACGCG | TGTTGGCC | AGGGACTTTGCTAGAA | CTGGATG  | CCCG |

|                                        |     |             |    |                  |      |        |                                                                                                                 |
|----------------------------------------|-----|-------------|----|------------------|------|--------|-----------------------------------------------------------------------------------------------------------------|
| 10*Chr1_54_IS407;10*Chr1_58b_IS407A_A  | D-R | PRL20       | 10 | 1994927-1996162  | Chr1 | IS407A | CGTCG/TGACCTGCCCCCTACA ATGAAGAAGCGCTTTACGCGCCCGCAAGCCAAACGCG; TGTTGGCCAGGGACTTTGCTAGAA( CGAACAG; GTGA CGAA N    |
| 5*Chr1_111_IS407;5*Chr1_64a_IS407A_A   | D-R | ATCC_10399  | 5  | 2000844-2002079  | Chr1 | IS407A | CTTGTT/TGACCTGCCCCCTACA ATGAAGAAGCGCTTTACGCGCCCGCAAGCCAAACGCG; TGTTGGCCAGGGACTTTGCTAGAA( CTGCTGCC TCGC CTGC N   |
| 10*Chr1_53b_IS40 10*Chr1_56_IS407A_A   | D-R | PRL20       | 10 | 2000800-2009315  | Chr1 | IS407A | TGGAA/TGACCTGCCCCCTACA ATGAAGAAGCGCTTTACGCGCCCGCAAGCCAAACGCG; TGTTGGCCAGGGACTTTGCTAGAA( ACGGCGA; GCGG ACGG N    |
| 6*Chr1_154b_IS407A_A                   | R   | NCTC_10229  | 6  | 2019764-2020999  | Chr1 | IS407A | CGCGC/TGACCTGCCCCCTACA ATGAAGAAGCGCTTTACGCGCCCGCAAGCCAAACGCG; TGTTGGCCAGGGACTTTGCTAGAA( AACCTCC GCTT AAC N      |
| 8*Chr1_115a_IS407;8*Chr1_132b_IS407A_A | R   | 2002721280  | 8  | 2021618-2022853  | Chr1 | IS407A | TTCCG/TGACCTGCCCCCTACA ATGAAGAAGCGCTTTACGCGCCCGCAAGCCAAACGCG; TGTTGGCCAGGGACTTTGCTAGAA( GGACGGG GATG GGAC N     |
| 10*Chr1_48_IS407;10*Chr1_55_IS407A_A   | D-R | PRL20       | 10 | 2021618-2022853  | Chr1 | IS407A | ATCAC/TGACCTGCCCCCTACA ATGAAGAAGCGCTTTACGCGCCCGCAAGCCAAACGCG; TGTTGGCCAGGGACTTTGCTAGAA( TTCCGGCC GCGG TTCC N    |
| 5*Chr1_62_IS407A_C                     | N   | ATCC_10399  | 5  | 2032228-2033345  | Chr1 | IS407A | #contig ~~~~~~ ACTTAATTAATTAAGTGTGTCGCCCGCAAGCCAAACGCG; TGTTGGCCAGGGACTTTGCTAGAA( GTGTGTFN # #contig_break N.D. |
| 7*Chr1_132a_IS407;7*Chr1_58a_IS407A_A  | R   | NCTC_10247  | 7  | 2032685-2033920  | Chr1 | IS407A | ACGCT/TGACCTGCCCCCTACA ATGAAGAAGCGCTTTACGCGCCCGCAAGCCAAACGCG; TGTTGGCCAGGGACTTTGCTAGAA( GTTCCGTC GGAC GTTC N    |
| 4*Chr1_48_IS407A 4*Chr1_58b_IS407A_A   | D-R | gb8_horse_4 | 4  | 2039586-2040821  | Chr1 | IS407A | CGTCG/TGACCTGCCCCCTACA ATGAAGAAGCGCTTTACGCGCCCGCAAGCCAAACGCG; TGTTGGCCAGGGACTTTGCTAGAA( GAAGTGG GTGA GAAG N     |
| 10*Chr1_132b_IS40 10*Chr1_47b_IS407A_A | R   | PRL20       | 10 | 2040335-2041570  | Chr1 | IS407A | TGAGG/TGACCTGCCCCCTACA ATGAAGAAGCGCTTTACGCGCCCGCAAGCCAAACGCG; TGTTGGCCAGGGACTTTGCTAGAA( GGACGGG CTTT GGAC N     |
| 1*Chr1_48_IS407A 1*Chr1_58b_IS407A_A   | D-R | ATCC_23344  | 1  | 2051541-2052776  | Chr1 | IS407A | CGTCG/TGACCTGCCCCCTACA ATGAAGAAGCGCTTTACGCGCCCGCAAGCCAAACGCG; TGTTGGCCAGGGACTTTGCTAGAA( GAAGTGG GTGA GAAG N     |
| 6*Chr1_20_IS407A 6*Chr1_21_IS407A_A    | D   | NCTC_10229  | 6  | 2052526-2053761  | Chr1 | IS407A | ATGTC/TGACCTGCCCCCTACA ATGAAGAAGCGCTTTACGCGCCCGCAAGCCAAACGCG; TGTTGGCCAGGGACTTTGCTAGAA( GTCCACG1 CCGG GTCC N    |
| 4*Chr1_132b_IS40 4*Chr1_47b_IS407A_A   | R   | gb8_horse_4 | 4  | 2058486-2059721  | Chr1 | IS407A | TGAGG/TGACCTGCCCCCTACA ATGAAGAAGCGCTTTACGCGCCCGCAAGCCAAACGCG; TGTTGGCCAGGGACTTTGCTAGAA( GGACGGG CTTT GGAC N     |
| 7*Chr1_47a_IS407;7*Chr1_57_IS407A_A    | D-R | NCTC_10247  | 7  | 2060132-2061367  | Chr1 | IS407A | TCCGC/TGACCTGCCCCCTACA ATGAAGAAGCGCTTTACGCGCCCGCAAGCCAAACGCG; TGTTGGCCAGGGACTTTGCTAGAA( CGTGGAC AAGG CGTG N     |
| 1*Chr1_132b_IS40 1*Chr1_47b_IS407A_A   | R   | ATCC_23344  | 1  | 2070441-2071676  | Chr1 | IS407A | TGAGG/TGACCTGCCCCCTACA ATGAAGAAGCGCTTTACGCGCCCGCAAGCCAAACGCG; TGTTGGCCAGGGACTTTGCTAGAA( GGACGGG CTTT GGAC N     |
| 2*Chr1_126b_IS40 2*Chr1_135_IS407A_A   | D-R | fmh         | 2  | 2072203-2073438  | Chr1 | IS407A | TGGAC/TGACCTGCCCCCTACA ATGAAGAAGCGCTTTACGCGCCCGCAAGCCAAACGCG; TGTTGGCCAGGGACTTTGCTAGAA( CAATCAG1 TCGC CAAT N    |
| 5*Chr1_61_IS407A_B                     | N   | ATCC_10399  | 5  | 2078643-2079878  | Chr1 | IS407A | TTTGT/TGACCTGCCCCCTACA ATGAAGAAGCGCTTTACGCGCCCGCAAGCCAAACGCG; TGTTGGCCAGGGACTTTGCTAGAA( CCCCAC1 CCCC CCCC Y     |
| 7*Chr1_43a_IS407;7*Chr1_45b_IS407A_A   | R   | NCTC_10247  | 7  | 2084226-2085461  | Chr1 | IS407A | TTCTG/TGACCTGCCCCCTACA ATGAAGAAGCGCTTTACGCGCCCGCAAGCCAAACGCG; TGTTGGCCAGGGACTTTGCTAGAA( CATTTGCC CCGC CATT N    |
| 3*Chr1_126b_IS40 3*Chr1_135_IS407A_A   | D-R | JHU         | 3  | 2087663-2088898  | Chr1 | IS407A | TGGAC/TGACCTGCCCCCTACA ATGAAGAAGCGCTTTACGCGCCCGCAAGCCAAACGCG; TGTTGGCCAGGGACTTTGCTAGAA( CAATCAG1 TCGC CAAT N    |
| 6*Chr1_18a_IS407A_A                    | N   | NCTC_10229  | 6  | 2097220-2098455  | Chr1 | IS407A | CGTCG/TGACCTGCCCCCTACA ATGAAGAAGCGCTTTACGCGCCCGCAAGCCAAACGCG; TGTTGGCCAGGGACTTTGCTAGAA( CACCGG1 CACC CACC Y     |
| 8*Chr1_134_IS407A_B                    | N   | 2002721280  | 8  | 2098656-2099891  | Chr1 | IS407A | CTTAT/TGACCTGCCCCCTACA ATGAAGAAGCGCTTTACGCGCCCGCAAGCCAAACGCG; TGTTGGCCAGGGACTTTGCTAGAA( GCACGGG GCAC GCAC Y     |
| 7*Chr1_42b_IS407A_A                    | N   | NCTC_10247  | 7  | 2105147-2106382  | Chr1 | IS407A | GCGCT/TGACCTGCCCCCTACA ATGAAGAAGCGCTTTACGCGCCCGCAAGCCAAACGCG; TGTTGGCCAGGGACTTTGCTAGAA( CCCCAC1 TGCG CCCC N     |
| 7*Chr1_136_IS407;7*Chr1_45a_IS407A_A   | D-R | NCTC_10247  | 7  | 2118845-2120080  | Chr1 | IS407A | GATCG/TGACCTGCCCCCTACA ATGAAGAAGCGCTTTACGCGCCCGCAAGCCAAACGCG; TGTTGGCCAGGGACTTTGCTAGAA( GATGTC1 GAAC GATG N     |
| 8*Chr1_126b_IS40 8*Chr1_135_IS407A_A   | D-R | 2002721280  | 8  | 2132568-2133803  | Chr1 | IS407A | CTGGA/TGACCTGCCCCCTACA ATGAAGAAGCGCTTTACGCGCCCGCAAGCCAAACGCG; TGTTGGCCAGGGACTTTGCTAGAA( CCGGAAG ATCG CCGG N     |
| 2*Chr1_37_IS407A_A                     | N   | fmh         | 2  | 214482-215717    | Chr1 | IS407A | CGTCG/TGACCTGCCCCCTACA ATGAAGAAGCGCTTTACGCGCCCGCAAGCCAAACGCG; TGTTGGCCAGGGACTTTGCTAGAA( GACCCGG CCAG GACC N     |
| 8*Chr1_37_IS407A_A                     | N   | 2002721280  | 8  | 214855-216090    | Chr1 | IS407A | CGCGA/TGACCTGCCCCCTACA ATGAAGAAGCGCTTTACGCGCCCGCAAGCCAAACGCG; TGTTGGCCAGGGACTTTGCTAGAA( GGTGCG1 CCGG GGTC N     |
| 10*Chr1_126b_IS40 10*Chr1_135_IS407A_A | D-R | PRL20       | 10 | 2149515-2150750  | Chr1 | IS407A | GCTCG/TGACCTGCCCCCTACA ATGAAGAAGCGCTTTACGCGCCCGCAAGCCAAACGCG; TGTTGGCCAGGGACTTTGCTAGAA( CGATGTG1 GATT CGAT N    |
| 3*Chr1_37_IS407A_A                     | N   | JHU         | 3  | 215326-216561    | Chr1 | IS407A | CGTCG/TGACCTGCCCCCTACA ATGAAGAAGCGCTTTACGCGCCCGCAAGCCAAACGCG; TGTTGGCCAGGGACTTTGCTAGAA( GACCCGG CCAG GACC N     |
| 10*Chr1_7_IS407A 10*Chr1_8_IS407A_A    | D   | PRL20       | 10 | 21550-22785      | Chr1 | IS407A | GGCGC/TGACCTGCCCCCTACA ATGAAGAAGCGCTTTACGCGCCCGCAAGCCAAACGCG; TGTTGGCCAGGGACTTTGCTAGAA( TTTCCAGT GACG TTTC N    |
| 4*Chr1_126b_IS40 4*Chr1_135_IS407A_A   | D-R | gb8_horse_4 | 4  | 2167514-2168749  | Chr1 | IS407A | TGGAC/TGACCTGCCCCCTACA ATGAAGAAGCGCTTTACGCGCCCGCAAGCCAAACGCG; TGTTGGCCAGGGACTTTGCTAGAA( CAATCAG1 TCGC CAAT N    |
| 2*Chr1_132a_IS407;2*Chr1_57_IS407A_A   | D-R | fmh         | 2  | 2174629-2175864  | Chr1 | IS407A | ACGCC/TGACCTGCCCCCTACA ATGAAGAAGCGCTTTACGCGCCCGCAAGCCAAACGCG; TGTTGGCCAGGGACTTTGCTAGAA( CGTGGAC1 GGAC CGTG N    |
| 1*Chr1_126b_IS40 1*Chr1_135_IS407A_A   | D-R | ATCC_23344  | 1  | 2179445-2180680  | Chr1 | IS407A | TGGAC/TGACCTGCCCCCTACA ATGAAGAAGCGCTTTACGCGCCCGCAAGCCAAACGCG; TGTTGGCCAGGGACTTTGCTAGAA( CAATCAG1 TCGC CAAT N    |
| 3*Chr1_132a_IS40 3*Chr1_57_IS407A_A    | D-R | JHU         | 3  | 2190089-2191324  | Chr1 | IS407A | ACGCC/TGACCTGCCCCCTACA ATGAAGAAGCGCTTTACGCGCCCGCAAGCCAAACGCG; TGTTGGCCAGGGACTTTGCTAGAA( CGTGGAC1 GGAC CGTG N    |
| 5*Chr1_48_IS407A 5*Chr1_58b_IS407A_A   | D-R | ATCC_10399  | 5  | 2200925-2202160  | Chr1 | IS407A | GCGCA/TGACCTGCCCCCTACA ATGAAGAAGCGCTTTACGCGCCCGCAAGCCAAACGCG; TGTTGGCCAGGGACTTTGCTAGAA( GAAGTGG CCCC GAAG N     |
| 2*Chr1_47a_IS407;2*Chr1_58a_IS407A_A   | R   | fmh         | 2  | 2201933-2203168  | Chr1 | IS407A | GAGTT/TGACCTGCCCCCTACA ATGAAGAAGCGCTTTACGCGCCCGCAAGCCAAACGCG; TGTTGGCCAGGGACTTTGCTAGAA( CCTTGGCC AACG CCTT N    |
| 3*Chr1_47a_IS407;3*Chr1_58a_IS407A_A   | R   | JHU         | 3  | 2217393-2218628  | Chr1 | IS407A | GAGTT/TGACCTGCCCCCTACA ATGAAGAAGCGCTTTACGCGCCCGCAAGCCAAACGCG; TGTTGGCCAGGGACTTTGCTAGAA( CCTTGGCC AACG CCTT N    |
| 5*Chr1_132b_IS40 5*Chr1_47b_IS407A_A   | R   | ATCC_10399  | 5  | 22219825-2221060 | Chr1 | IS407A | TGAGG/TGACCTGCCCCCTACA ATGAAGAAGCGCTTTACGCGCCCGCAAGCCAAACGCG; TGTTGGCCAGGGACTTTGCTAGAA( GGACGGG CTTT GGAC N     |
| 5*Chr1_133_IS407A_C                    | N   | ATCC_10399  | 5  | 2224765-2226000  | Chr1 | IS407A | CCCGA/TGACCTGCCCCCTACA ATGAAGAAGCGCTTTACGCGCCCGCAAGCCAAACGCG; TGTTGGCCAGGGACTTTGCTAGAA( GCGGGCA GCGG GCGG Y     |
| 2*Chr1_43a_IS407;2*Chr1_45b_IS407A_A   | R   | fmh         | 2  | 2226033-2227268  | Chr1 | IS407A | GGTTG/TGACCTGCCCCCTACA ATGAAGAAGCGCTTTACGCGCCCGCAAGCCAAACGCG; TGTTGGCCAGGGACTTTGCTAGAA( GCGGTGC CCGG GCGG Y     |
| 7*Chr1_20_IS407A 7*Chr1_21_IS407A_A    | D   | NCTC_10247  | 7  | 2231283-2232518  | Chr1 | IS407A | ATGTC/TGACCTGCCCCCTACA ATGAAGAAGCGCTTTACGCGCCCGCAAGCCAAACGCG; TGTTGGCCAGGGACTTTGCTAGAA( GTCCACG1 CCGG GTCC N    |
| 8*Chr1_132a_IS40 8*Chr1_58a_IS407A_A   | R   | 2002721280  | 8  | 2238334-2239569  | Chr1 | IS407A | ACGCC/TGACCTGCCCCCTACA ATGAAGAAGCGCTTTACGCGCCCGCAAGCCAAACGCG; TGTTGGCCAGGGACTTTGCTAGAA( GTTCCGTC GGAC GTTC N    |
| 3*Chr1_43a_IS407;3*Chr1_45b_IS407A_A   | R   | JHU         | 3  | 2241493-2242728  | Chr1 | IS407A | GGTTG/TGACCTGCCCCCTACA ATGAAGAAGCGCTTTACGCGCCCGCAAGCCAAACGCG; TGTTGGCCAGGGACTTTGCTAGAA( GCGGTGC CCGG GCGG Y     |
| 2*Chr1_42b_IS407A_A                    | N   | fmh         | 2  | 2246967-2248202  | Chr1 | IS407A | GCGCT/TGACCTGCCCCCTACA ATGAAGAAGCGCTTTACGCGCCCGCAAGCCAAACGCG; TGTTGGCCAGGGACTTTGCTAGAA( CCCCAC1 TGCG CCCC N     |
| 6*Chr1_31_IS407A_C                     | N   | NCTC_10229  | 6  | 2252754-2253989  | Chr1 | IS407A | GCTAT/TGACCTGCCCCCTACA ATGAAGAAGCGCTTTACGCGCCCGCAAGCCAAACGCG; TGTTGGCCAGGGACTTTGCTAGAA( CGATGAC1 CGAT CGAT Y    |
| 10*Chr1_132a_IS40 10*Chr1_58a_IS407A_A | R   | PRL20       | 10 | 2255102-2256337  | Chr1 | IS407A | GACCT/TGACCTGCCCCCTACA ATGAAGAAGCGCTTTACGCGCCCGCAAGCCAAACGCG; TGTTGGCCAGGGACTTTGCTAGAA( GTTTCGCT GGAC GTTT N    |
| 2*Chr1_136_IS407;2*Chr1_45a_IS407A_A   | D-R | fmh         | 2  | 2260664-2261899  | Chr1 | IS407A | GATCG/TGACCTGCCCCCTACA ATGAAGAAGCGCTTTACGCGCCCGCAAGCCAAACGCG; TGTTGGCCAGGGACTTTGCTAGAA( GATGTC1 GAAC GATG N     |
| 6*Chr1_30_IS407A 6*Chr1_6_IS407A_A     | D-R | NCTC_10229  | 6  | 2261519-2262754  | Chr1 | IS407A | TTGAG/TGACCTGCCCCCTACA ATGAAGAAGCGCTTTACGCGCCCGCAAGCCAAACGCG; TGTTGGCCAGGGACTTTGCTAGAA( CCCCAC1 TCGG CCGC N     |
| 3*Chr1_42b_IS407A_A                    | N   | JHU         | 3  | 2262324-2263559  | Chr1 | IS407A | GCGCT/TGACCTGCCCCCTACA ATGAAGAAGCGCTTTACGCGCCCGCAAGCCAAACGCG; TGTTGGCCAGGGACTTTGCTAGAA( CCTTGGCC TGCG CCCC N    |
| 7*Chr1_8_IS407A_A                      | D-R | NCTC_10247  | 7  | 2264036-2265271  | Chr1 | IS407A | GGCGC/TGACCTGCCCCCTACA ATGAAGAAGCGCTTTACGCGCCCGCAAGCCAAACGCG; TGTTGGCCAGGGACTTTGCTAGAA( AACCTCC GACC AAC N      |
| 9*Chr1_111_IS407;9*Chr1_53a_IS407A_B   | D-R | SAVP1       | 9  | 2265201-2266634  | Chr1 | IS407A | GAAGG/TGACCTGCCCCCTACA ATGAAGAAGCGCTTTACGCGCCCGCAAGCCAAACGCG; TGTTGGCCAGGGACTTTGCTAGAA( CTGTGCC ACGG CTGC N     |
| 8*Chr1_47a_IS407;8*Chr1_57_IS407A_A    | D-R | 2002721280  | 8  | 2265797-2267032  | Chr1 | IS407A | TCCGC/TGACCTGCCCCCTACA ATGAAGAAGCGCTTTACGCGCCCGCAAGCCAAACGCG; TGTTGGCCAGGGACTTTGCTAGAA( CGTGGAC AAGG CGTG N     |
| 4*Chr1_132a_IS40 4*Chr1_57_IS407A_A    | D-R | gb8_horse_4 | 4  | 2269939-2271174  | Chr1 | IS407A | ACGCC/TGACCTGCCCCCTACA ATGAAGAAGCGCTTTACGCGCCCGCAAGCCAAACGCG; TGTTGGCCAGGGACTTTGCTAGAA( CGTGGAC1 GGAC CGTG N    |
| 6*Chr1_7_IS407A 6*Chr1_8_IS407A_A      | D   | NCTC_10229  | 6  | 2274369-2275604  | Chr1 | IS407A | GGCGC/TGACCTGCCCCCTACA ATGAAGAAGCGCTTTACGCGCCCGCAAGCCAAACGCG; TGTTGGCCAGGGACTTTGCTAGAA( TGAGAGC1 GACC TGAG N    |
| 3*Chr1_136_IS407;3*Chr1_45a_IS407A_A   | D-R | JHU         | 3  | 2276021-2277256  | Chr1 | IS407A | GATCG/TGACCTGCCCCCTACA ATGAAGAAGCGCTTTACGCGCCCGCAAGCCAAACGCG; TGTTGGCCAGGGACTTTGCTAGAA( GATGTC1 GAAC GATG N     |
| 1*Chr1_132a_IS40 1*Chr1_57_IS407A_A    | D-R | ATCC_23344  | 1  | 2281870-2283105  | Chr1 | IS407A | ACGCC/TGACCTGCCCCCTACA ATGAAGAAGCGCTTTACGCGCCCGCAAGCCAAACGCG; TGTTGGCCAGGGACTTTGCTAGAA( CGTGGAC1 GGAC CGTG N    |
| 10*Chr1_43b_IS40 10*Chr1_57_IS407A_A   | D-R | PRL20       | 10 | 2282474-2283709  | Chr1 | IS407A | CCCGT/TGACCTGCCCCCTACA ATGAAGAAGCGCTTTACGCGCCCGCAAGCCAAACGCG; TGTTGGCCAGGGACTTTGCTAGAA( CGTGGAC1 CCCC CGTG N    |
| 7*Chr1_10_IS407A_A                     | N   | NCTC_10247  | 7  | 2282563-2283798  | Chr1 | IS407A | GGCGC/TGACCTGCCCCCTACA ATGAAGAAGCGCTTTACGCGCCCGCAAGCCAAACGCG; TGTTGGCCAGGGACTTTGCTAGAA( CCTATGCC GACC CCTA N    |
| 8*Chr1_43a_IS407;8*Chr1_45b_IS407A_A   | R   | 2002721280  | 8  | 2289894-2291129  | Chr1 | IS407A | GGCTT/TGACCTGCCCCCTACA ATGAAGAAGCGCTTTACGCGCCCGCAAGCCAAACGCG; TGTTGGCCAGGGACTTTGCTAGAA( GCGGTGC GTGC GCGG N     |

|                                               |     |             |    |                 |      |        |                                                                                                  |      |      |      |
|-----------------------------------------------|-----|-------------|----|-----------------|------|--------|--------------------------------------------------------------------------------------------------|------|------|------|
| 6*Chr1_10_IS407A_A                            | N   | NCTC_10229  | 6  | 2291924-2293159 | Chr1 | IS407A | CGCCA TGACCTGCCCCCTACA ATGAAGAAGCGCTTTACGCGCCCGCAAGCCAAACGCG; TGTTGGCCAGGGACTTTGCTAGAA CCTATGCC  | CCCT | CCTA | N    |
| 4*Chr1_47a_IS407/4*Chr1_58a_IS407A_A          | R   | gb8_horse_4 | 4  | 2297269-2298504 | Chr1 | IS407A | GAGTTTGACCTGCCCCCTACA ATGAAGAAGCGCTTTACGCGCCCGCAAGCCAAACGCG; TGTTGGCCAGGGACTTTGCTAGAA CCTTGGCC   | AACG | CCTT | N    |
| 7*Chr1_11_IS407A_C                            | N   | NCTC_10247  | 7  | 2300118-2301353 | Chr1 | IS407A | CGCCA TGACCTGCCCCCTACA ATGAAGAAGCGCTTTACGCGCCCGCAAGCCAAACGCG; TGTTGGCCAGGGACTTTGCTAGAA CCTATGCC  | CCCT | CCTA | N    |
| 1*Chr1_47a_IS407/1*Chr1_58a_IS407A_A          | R   | ATCC_23344  | 1  | 2309174-2310409 | Chr1 | IS407A | GAGTTTGACCTGCCCCCTACA ATGAAGAAGCGCTTTACGCGCCCGCAAGCCAAACGCG; TGTTGGCCAGGGACTTTGCTAGAA CCTTGGCC   | AACG | CCTT | N    |
| 8*Chr1_42b_IS407A_A                           | N   | 2002721280  | 8  | 2310485-2311720 | Chr1 | IS407A | GCGCT TGACCTGCCCCCTACA ATGAAGAAGCGCTTTACGCGCCCGCAAGCCAAACGCG; TGTTGGCCAGGGACTTTGCTAGAA CCTCAAACT | TGCC | CCCA | N    |
| 10*Chr1_38_IS407A_C                           | N   | PRL20       | 10 | 2311172-2312193 | Chr1 | IS407A | #contig ~~~~~ ATGAAGAAGCGCTTTACGCGCCCGCAAGCCAAACGCG; TGTTGGCCAGGGACTTTGCTAGAA CGTGAACT           | #    | CGTG | N.D. |
| 10*Chr1_40b_IS407A_C                          | R   | PRL20       | 10 | 2312315-2313344 | Chr1 | IS407A | #contig ~~~~~ ATGAAGAAGCGCTTTACGCGCCCGCAAGCCAAACGCG; TGTTGGCC ~~~~~ #contig_br                   | #    | #con | N.D. |
| 10*Chr1_42a_IS40/10*Chr1_43a_IS407A_A         | R   | PRL20       | 10 | 2316739-2317974 | Chr1 | IS407A | GCGCT TGACCTGCCCCCTACA ATGAAGAAGCGCTTTACGCGCCCGCAAGCCAAACGCG; TGTTGGCCAGGGACTTTGCTAGAA CCGGACG   | TGCC | CCGC | N    |
| 4*Chr1_43a_IS407/4*Chr1_45b_IS407A_A          | R   | gb8_horse_4 | 4  | 2321369-2322604 | Chr1 | IS407A | GTTTG; TGACCTGCCCCCTACA ATGAAGAAGCGCTTTACGCGCCCGCAAGCCAAACGCG; TGTTGGCCAGGGACTTTGCTAGAA GCGGTGC  | GCGG | GCGG | Y    |
| 8*Chr1_136_IS407/8*Chr1_45a_IS407A_A          | D-R | 2002721280  | 8  | 2323299-2324534 | Chr1 | IS407A | GATCG; TGACCTGCCCCCTACA ATGAAGAAGCGCTTTACGCGCCCGCAAGCCAAACGCG; TGTTGGCCAGGGACTTTGCTAGAA GATGCTC/ | GAAC | GATG | N    |
| 5*Chr1_126b_IS40/5*Chr1_135_IS407A_A          | D-R | ATCC_10399  | 5  | 2330125-2331360 | Chr1 | IS407A | TGGAC TGACCTGCCCCCTACA ATGAAGAAGCGCTTTACGCGCCCGCAAGCCAAACGCG; TGTTGGCCAGGGACTTTGCTAGAA CCTCGACC  | TCGC | CCTC | N    |
| 1*Chr1_43a_IS407/1*Chr1_45b_IS407A_A          | R   | ATCC_23344  | 1  | 2333274-2334509 | Chr1 | IS407A | GTTTG; TGACCTGCCCCCTACA ATGAAGAAGCGCTTTACGCGCCCGCAAGCCAAACGCG; TGTTGGCCAGGGACTTTGCTAGAA GCGGTGC  | GCGG | GCGG | Y    |
| 10*Chr1_33_IS407/10*Chr1_40a_IS4/10*Chr1_42b_ | D-R | PRL20       | 10 | 2337504-2338663 | Chr1 | IS407A | CCGCA TGACCTGCCCCCTACA ATGAAGAAGCGCTTTACGCGCCCGCAAGCCAAACGCG; TGTTGGCC CACACCGCT #can not f      | CAAT | #can | N.D. |
| 4*Chr1_42b_IS407A_A                           | N   | gb8_horse_4 | 4  | 2342200-2343435 | Chr1 | IS407A | GCGCT TGACCTGCCCCCTACA ATGAAGAAGCGCTTTACGCGCCCGCAAGCCAAACGCG; TGTTGGCCAGGGACTTTGCTAGAA CCCCAACT  | TGCC | CCCA | N    |
| 6*Chr1_77_IS407A/6*Chr1_94a_IS407A_A          | D-R | NCTC_10229  | 6  | 234555-235790   | Chr1 | IS407A | ATGAT TGACCTGCCCCCTACA ATGAAGAAGCGCTTTACGCGCCCGCAAGCCAAACGCG; TGTTGGCCAGGGACTTTGCTAGAA AACCGATC  | AGGT | AACC | N    |
| 10*Chr1_35b_IS40/10*Chr1_45a_IS407A_A         | R   | PRL20       | 10 | 2350565-2351800 | Chr1 | IS407A | GTGAA TGACCTGCCCCCTACA ATGAAGAAGCGCTTTACGCGCCCGCAAGCCAAACGCG; TGTTGGCCAGGGACTTTGCTAGAA GATGCTC/  | GATT | GATG | N    |
| 1*Chr1_42b_IS407A_A                           | N   | ATCC_23344  | 1  | 2354105-2355340 | Chr1 | IS407A | GCGCT TGACCTGCCCCCTACA ATGAAGAAGCGCTTTACGCGCCCGCAAGCCAAACGCG; TGTTGGCCAGGGACTTTGCTAGAA CCCCAACT  | TGCC | CCCA | N    |
| 4*Chr1_136_IS407/4*Chr1_45a_IS407A_A          | D-R | gb8_horse_4 | 4  | 2355846-2357081 | Chr1 | IS407A | GATCG; TGACCTGCCCCCTACA ATGAAGAAGCGCTTTACGCGCCCGCAAGCCAAACGCG; TGTTGGCCAGGGACTTTGCTAGAA GATGCTC/ | GAAC | GATG | N    |
| 9*Chr1_112_IS407/9*Chr1_49_IS407A_A           | D-R | SAVP1       | 9  | 2356417-2357652 | Chr1 | IS407A | TCATC TGACCTGCCCCCTACA ATGAAGAAGCGCTTTACGCGCCCGCAAGCCAAACGCG; TGTTGGCCAGGGACTTTGCTAGAA GGGCTGA   | TCAA | GGGC | N    |
| 1*Chr1_136_IS407/1*Chr1_45a_IS407A_A          | D-R | ATCC_23344  | 1  | 2367803-2369038 | Chr1 | IS407A | GATCG; TGACCTGCCCCCTACA ATGAAGAAGCGCTTTACGCGCCCGCAAGCCAAACGCG; TGTTGGCCAGGGACTTTGCTAGAA GATGCTC/ | GAAC | GATG | N    |
| 10*Chr1_126a_IS407A_A                         | R   | PRL20       | 10 | 2373356-2374591 | Chr1 | IS407A | AAAAA TGACCTGCCCCCTACA ATGAAGAAGCGCTTTACGCGCCCGCAAGCCAAACGCG; TGTTGGCCAGGGACTTTGCTAGAA TTTTTCAT  | AAGC | TTTT | N    |
| 10*Chr1_47a_IS407A_A                          | R   | PRL20       | 10 | 2375892-2377127 | Chr1 | IS407A | TCCGC; TGACCTGCCCCCTACA ATGAAGAAGCGCTTTACGCGCCCGCAAGCCAAACGCG; TGTTGGCCAGGGACTTTGCTAGAA CCTGCCA  | AAGG | CCTG | N    |
| 10*Chr1_34_IS407/10*Chr1_45b_IS407A_A         | D-R | PRL20       | 10 | 2399992-2401227 | Chr1 | IS407A | TTCTG TGACCTGCCCCCTACA ATGAAGAAGCGCTTTACGCGCCCGCAAGCCAAACGCG; TGTTGGCCAGGGACTTTGCTAGAA GGGGGAT   | CCGC | GGGG | N    |
| 7*Chr1_34_IS407A/7*Chr1_35b_IS407A_A          | D-R | NCTC_10247  | 7  | 24007-25242     | Chr1 | IS407A | GTGAA TGACCTGCCCCCTACA ATGAAGAAGCGCTTTACGCGCCCGCAAGCCAAACGCG; TGTTGGCCAGGGACTTTGCTAGAA GGGGGAT   | GATT | GGGG | N    |
| 5*Chr1_131_IS407A_C                           | N   | ATCC_10399  | 5  | 2411631-2412866 | Chr1 | IS407A | CGCCA TGACCTGCCCCCTACA ATGAAGAAGCGCTTTACGCGCCCGCAAGCCAAACGCG; TGTTGGCCAGGGACTTTGCTAGAA GAGGAAG   | GAGG | GAGG | Y    |
| 10*Chr1_136_IS40/10*Chr1_35a_IS407A_A         | D-R | PRL20       | 10 | 2417756-2418991 | Chr1 | IS407A | GATCG; TGACCTGCCCCCTACA ATGAAGAAGCGCTTTACGCGCCCGCAAGCCAAACGCG; TGTTGGCCAGGGACTTTGCTAGAA CCGGAAC  | GAAC | CCGG | N    |
| 9*Chr1_113_IS407/9*Chr1_114_IS407A_A          | D   | SAVP1       | 9  | 2426311-2427456 | Chr1 | IS407A | CGAGC TGACCTGCCCCCTACA ATGAAGAAGCGCTTTACGCGCCCGCAAGCCAAACGCG; TGTTGGCCAGGGACTTTGCTAGAA GATCCGGC  | AGAT | GATC | N    |
| 5*Chr1_132a_IS40/5*Chr1_58a_IS407A_A          | R   | ATCC_10399  | 5  | 2431373-2432608 | Chr1 | IS407A | ACGCC TGACCTGCCCCCTACA ATGAAGAAGCGCTTTACGCGCCCGCAAGCCAAACGCG; TGTTGGCCAGGGACTTTGCTAGAA CGTTCCGT  | GGAC | ACGC | N    |
| 6*Chr1_33_IS407A/6*Chr1_35a_IS407A_A          | D-R | NCTC_10229  | 6  | 2435363-2436598 | Chr1 | IS407A | CCGCA TGACCTGCCCCCTACA ATGAAGAAGCGCTTTACGCGCCCGCAAGCCAAACGCG; TGTTGGCCAGGGACTTTGCTAGAA GGGGCAG   | CAAT | GGGG | N    |
| 7*Chr1_30_IS407A/7*Chr1_33_IS407A_A           | D-R | NCTC_10247  | 7  | 2443334-2444659 | Chr1 | IS407A | CCGCA TGACCTGCCCCCTACA ATGAAGAAGCGCTTTACGCGCCCGCAAGCCAAACGCG; TGTTGGCCAGGGACTTTGCTAGAA CGCCGCA   | CAAT | CGCC | N    |
| 6*Chr1_34_IS407A/6*Chr1_35b_IS407A_A          | D-R | NCTC_10229  | 6  | 2453363-2454598 | Chr1 | IS407A | GTGAA TGACCTGCCCCCTACA ATGAAGAAGCGCTTTACGCGCCCGCAAGCCAAACGCG; TGTTGGCCAGGGACTTTGCTAGAA GGGGGAT   | GATT | GGGG | N    |
| 5*Chr1_47a_IS407/5*Chr1_57_IS407A_A           | D-R | ATCC_10399  | 5  | 2458648-2459883 | Chr1 | IS407A | TCCGC; TGACCTGCCCCCTACA ATGAAGAAGCGCTTTACGCGCCCGCAAGCCAAACGCG; TGTTGGCCAGGGACTTTGCTAGAA CGTGGAC  | AAGG | CGTG | N    |
| 5*Chr1_43a_IS407/5*Chr1_45b_IS407A_A          | R   | ATCC_10399  | 5  | 2482748-2483983 | Chr1 | IS407A | TTCTG TGACCTGCCCCCTACA ATGAAGAAGCGCTTTACGCGCCCGCAAGCCAAACGCG; TGTTGGCCAGGGACTTTGCTAGAA AAGGGGG   | CCGC | AAGG | N    |
| 6*Chr1_37_IS407A_A                            | N   | NCTC_10229  | 6  | 2492041-2493276 | Chr1 | IS407A | CGCGA TGACCTGCCCCCTACA ATGAAGAAGCGCTTTACGCGCCCGCAAGCCAAACGCG; TGTTGGCCAGGGACTTTGCTAGAA GGTGCCC   | CGCC | GGTC | N    |
| 9*Chr1_115a_IS407A_A                          | N   | SAVP1       | 9  | 2497406-2498641 | Chr1 | IS407A | TTCCG TGACCTGCCCCCTACA ATGAAGAAGCGCTTTACGCGCCCGCAAGCCAAACGCG; TGTTGGCCAGGGACTTTGCTAGAA GATGACAI  | GATG | GATG | Y    |
| 5*Chr1_42b_IS407A_A                           | N   | ATCC_10399  | 5  | 2503596-2504831 | Chr1 | IS407A | GCGCT TGACCTGCCCCCTACA ATGAAGAAGCGCTTTACGCGCCCGCAAGCCAAACGCG; TGTTGGCCAGGGACTTTGCTAGAA CCCCAACT  | TGCC | CCCA | N    |
| 8*Chr1_152b_IS40/8*Chr1_157_IS407A_A          | D-R | 2002721280  | 8  | 2512937-2514172 | Chr1 | IS407A | GAAAC TGACCTGCCCCCTACA ATGAAGAAGCGCTTTACGCGCCCGCAAGCCAAACGCG; TGTTGGCCAGGGACTTTGCTAGAA GATGCTC/  | GGTC | GATG | N    |
| 5*Chr1_136_IS407/5*Chr1_45a_IS407A_A          | D-R | ATCC_10399  | 5  | 2517611-2517946 | Chr1 | IS407A | GATCG; TGACCTGCCCCCTACA ATGAAGAAGCGCTTTACGCGCCCGCAAGCCAAACGCG; TGTTGGCCAGGGACTTTGCTAGAA GATGCTC/ | GAAC | GATG | N    |
| 2*Chr1_145_IS407A_A                           | N   | fhm         | 2  | 2523638-2524540 | Chr1 | IS407A | #IS407/ ~~~~~ ACCCGCAAGCCAAACGCG; TGTTGGCCAGGGACTTTGCTAGAA GGCTTCG                               | #    | GGCT | N.D. |
| 7*Chr1_115b_IS40/7*Chr1_47b_IS407A_A          | R   | NCTC_10247  | 7  | 2523711-2523606 | Chr1 | IS407A | GAGCC TGACCTGCCCCCTACA ATGAAGAAGCGCTTTACGCGCCCGCAAGCCAAACGCG; TGTTGGCCAGGGACTTTGCTAGAA GATGACAI  | GAGC | GATG | N    |
| 2*Chr1_146_IS407A_B                           | N   | fhm         | 2  | 2524541-2525776 | Chr1 | IS407A | AAGCC TGACCTGCCCCCTACA ATGAAGAAGCGCTTTACGCGCCCGCAAGCCAAACGCG; TGTTGGCCAGGGACTTTGCTAGAA CCGCAAI   | ATAG | CCCG | N    |
| 5*Chr1_137_IS407A_C                           | N   | ATCC_10399  | 5  | 2538164-2539399 | Chr1 | IS407A | CGGCG TGACCTGCCCCCTACA ATGAAGAAGCGCTTTACGCGCCCGCAAGCCAAACGCG; TGTTGGCCAGGGACTTTGCTAGAA ATACGGT   | ATAC | ATAC | Y    |
| 3*Chr1_145_IS407A_A                           | N   | JHU         | 3  | 2540286-2541188 | Chr1 | IS407A | #IS407/ ~~~~~ ACCCGCAAGCCAAACGCG; TGTTGGCCAGGGACTTTGCTAGAA GGCTTCG                               | #    | GGCT | N.D. |
| 3*Chr1_146_IS407A_B                           | N   | JHU         | 3  | 2541189-2542424 | Chr1 | IS407A | AAGCC TGACCTGCCCCCTACA ATGAAGAAGCGCTTTACGCGCCCGCAAGCCAAACGCG; TGTTGGCCAGGGACTTTGCTAGAA CCGCAAI   | ATAG | CCCG | N    |
| 8*Chr1_152a_IS40/8*Chr1_154a_IS407A_A         | R   | 2002721280  | 8  | 2560366-2561601 | Chr1 | IS407A | GACGC TGACCTGCCCCCTACA ATGAAGAAGCGCTTTACGCGCCCGCAAGCCAAACGCG; TGTTGGCCAGGGACTTTGCTAGAA GGGGAGC   | CCCC | GGGA | N    |
| 6*Chr1_47a_IS407/6*Chr1_57_IS407A_A           | D-R | NCTC_10229  | 6  | 2560595-2561830 | Chr1 | IS407A | TCCGC; TGACCTGCCCCCTACA ATGAAGAAGCGCTTTACGCGCCCGCAAGCCAAACGCG; TGTTGGCCAGGGACTTTGCTAGAA CGTGGAC  | AAGG | CGTG | N    |
| 2*Chr1_154b_IS407A_A                          | R   | fhm         | 2  | 2564570-2565805 | Chr1 | IS407A | GCGCG TGACCTGCCCCCTACA ATGAAGAAGCGCTTTACGCGCCCGCAAGCCAAACGCG; TGTTGGCCAGGGACTTTGCTAGAA AACCTCC   | GCTT | AACC | N    |
| 9*Chr1_122_IS407A_A                           | N   | SAVP1       | 9  | 2567392-2568627 | Chr1 | IS407A | TAATG TGACCTGCCCCCTACA ATGAAGAAGCGCTTTACGCGCCCGCAAGCCAAACGCG; TGTTGGCCAGGGACTTTGCTAGAA CTTCGTGC  | GCAC | CTTC | N    |
| 8*Chr1_160a_IS407A_A                          | R   | 2002721280  | 8  | 2576706-2577325 | Chr1 | IS407A | #contig ~~~~~ AGGGACTTTGCTAGAA GTCCGGG                                                           | #    | GTCC | N.D. |
| 8*Chr1_161_IS407A_A                           | D-R | 2002721280  | 8  | 2577952-2578666 | Chr1 | IS407A | TACGA TGACCTGCCCCCTACA ATGAAGAAGCGCTTTACGCGCCCGCAAGCCAAACGCG; TGTTGGCCAGGGACTTTGCTAGAA GTCCGGG   | TTTT | GTCC | N    |
| 3*Chr1_154b_IS407A_A                          | R   | JHU         | 3  | 2581218-2582453 | Chr1 | IS407A | CGCGC TGACCTGCCCCCTACA ATGAAGAAGCGCTTTACGCGCCCGCAAGCCAAACGCG; TGTTGGCCAGGGACTTTGCTAGAA AACCTCC   | GCCT | AACC | N    |
| 6*Chr1_132a_IS40/6*Chr1_58a_IS407A_A          | R   | NCTC_10229  | 6  | 2588026-2589261 | Chr1 | IS407A | ACGCC TGACCTGCCCCCTACA ATGAAGAAGCGCTTTACGCGCCCGCAAGCCAAACGCG; TGTTGGCCAGGGACTTTGCTAGAA GTTCGCTC  | GGAC | GTTC | N    |
| 2*Chr1_152b_IS40/2*Chr1_157_IS407A_A          | D-R | fhm         | 2  | 2598865-2600100 | Chr1 | IS407A | GAAAC TGACCTGCCCCCTACA ATGAAGAAGCGCTTTACGCGCCCGCAAGCCAAACGCG; TGTTGGCCAGGGACTTTGCTAGAA GCCTGATC  | GGTC | GCCT | N    |
| 9*Chr1_126a_IS407A_A                          | R   | SAVP1       | 9  | 2614152-2615387 | Chr1 | IS407A | AAAAA TGACCTGCCCCCTACA ATGAAGAAGCGCTTTACGCGCCCGCAAGCCAAACGCG; TGTTGGCCAGGGACTTTGCTAGAA TTTTTCAT  | AAGC | TTTT | N    |
| 7*Chr1_143a_IS40/7*Chr1_18b_IS407A_A          | R   | NCTC_10247  | 7  | 2614655-2615890 | Chr1 | IS407A | CGCGC TGACCTGCCCCCTACA ATGAAGAAGCGCTTTACGCGCCCGCAAGCCAAACGCG; TGTTGGCCAGGGACTTTGCTAGAA ATCAAGC   | CACC | ATCA | N    |
| 3*Chr1_152b_IS40/3*Chr1_157_IS407A_A          | D-R | JHU         | 3  | 2615744-2616979 | Chr1 | IS407A | GAAAC TGACCTGCCCCCTACA ATGAAGAAGCGCTTTACGCGCCCGCAAGCCAAACGCG; TGTTGGCCAGGGACTTTGCTAGAA GCCTGATC  | GGTC | GCCT | N    |
| 9*Chr1_47a_IS407A_A                           | R   | SAVP1       | 9  | 2616688-2617923 | Chr1 | IS407A | TCCGC; TGACCTGCCCCCTACA ATGAAGAAGCGCTTTACGCGCCCGCAAGCCAAACGCG; TGTTGGCCAGGGACTTTGCTAGAA CCTGCCA  | AAGG | CCTG | N    |
| 4*Chr1_145_IS407A_A                           | N   | gb8_horse_4 | 4  | 2618181-2619083 | Chr1 | IS407A | #IS407/ ~~~~~ ACCCGCAAGCCAAACGCG; TGTTGGCCAGGGACTTTGCTAGAA GGCTTCG                               | #    | GGCT | N.D. |

|                                           |      |             |    |                 |      |        |                                                                                                  |            |      |      |      |
|-------------------------------------------|------|-------------|----|-----------------|------|--------|--------------------------------------------------------------------------------------------------|------------|------|------|------|
| 4*Chr1_146_IS407A_B                       | N    | gb8_horse_4 | 4  | 2619084-2620319 | Chr1 | IS407A | AAGCC TGACCTGCCCCCTACA ATGAAGAAGCGCTTTACGCGCCCGCAAGCCAAACGCG; TGTTGGCCAGGGACTTTGCTAGAA( CCGCAAI  | ATAG       | CCCG | N    |      |
| 1*Chr1_145_IS407A_A                       | N    | ATCC_23344  | 1  | 2630161-2631063 | Chr1 | IS407A | #IS407) ~~~~~ ACCCGCAAGCCAAACGCG; TGTTGGCCAGGGACTTTGCTAGAA( GGCTTCG                              | #          | GGCT | N.D. |      |
| 1*Chr1_146_IS407A_B                       | N    | ATCC_23344  | 1  | 2631064-2632299 | Chr1 | IS407A | AAGCC TGACCTGCCCCCTACA ATGAAGAAGCGCTTTACGCGCCCGCAAGCCAAACGCG; TGTTGGCCAGGGACTTTGCTAGAA( CCGCAAI  | ATAG       | CCCG | N    |      |
| 9*Chr1_34_IS407A_9*Chr1_45a_IS407A_A      | D-R  | SAVP1       | 9  | 2640788-2642023 | Chr1 | IS407A | CAGAA TGACCTGCCCCCTACA ATGAAGAAGCGCTTTACGCGCCCGCAAGCCAAACGCG; TGTTGGCCAGGGACTTTGCTAGAA( CCGGTGC  | CCCC       | CGCG | N    |      |
| 8*Chr1_160b_IS407A_A                      | R    | 2002721280  | 8  | 2641872-2643107 | Chr1 | IS407A | CGCGC TGACCTGCCCCCTACA ATGAAGAAGCGCTTTACGCGCCCGCAAGCCAAACGCG; TGTTGGCCAGGGACTTTGCTAGAA( ATCCACTC | GTCC       | ATCC | N    |      |
| 2*Chr1_154a_IS407A_2*Chr1_4_IS407A_B      | D-R  | fmh         | 2  | 2647276-2648511 | Chr1 | IS407A | GCAGC TGACCTGCCCCCTACA ATGAAGAAGCGCTTTACGCGCCCGCAAGCCAAACGCG; TGTTGGCCAGGGACTTTGCTAGAA( GACAGGG  | CCCC       | GACA | N    |      |
| 7*Chr1_2a_IS407A_A                        | null | NCTC_10247  | 7  | 2648929-2650164 | Chr1 | IS407A | GATGC TGACCTGCCCCCTACA ATGAAGAAGCGCTTTACGCGCCCGCAAGCCAAACGCG; TGTTGGCCAGGGACTTTGCTAGAA( ACGAGCT  | GACG       | ACGA | N    |      |
| 9*Chr1_33_IS407A_9*Chr1_35a_IS407A_A      | D-R  | SAVP1       | 9  | 2658552-2659787 | Chr1 | IS407A | CGCCA TGACCTGCCCCCTACA ATGAAGAAGCGCTTTACGCGCCCGCAAGCCAAACGCG; TGTTGGCCAGGGACTTTGCTAGAA( AACCCTCC | CAAT       | CCCG | N    |      |
| 4*Chr1_154b_IS407A_A                      | R    | gb8_horse_4 | 4  | 2659248-2660362 | Chr1 | IS407A | CGCGC TGACCTGCCCCCTACA ATGAAGAAGCGCTTTACGCGCCCGCAAGCCAAACGCG; TGTTGGCC#                          | #IS407A o  | GCTT | #IS4 | N.D. |
| 3*Chr1_154a_IS407A_3*Chr1_4_IS407A_B      | D-R  | JHU         | 3  | 2664079-2665314 | Chr1 | IS407A | GCAGC TGACCTGCCCCCTACA ATGAAGAAGCGCTTTACGCGCCCGCAAGCCAAACGCG; TGTTGGCCAGGGACTTTGCTAGAA( GACAGGG  | CCCC       | GACA | N    |      |
| 1*Chr1_154b_IS407A_A                      | R    | ATCC_23344  | 1  | 2671093-2672328 | Chr1 | IS407A | CGCGC TGACCTGCCCCCTACA ATGAAGAAGCGCTTTACGCGCCCGCAAGCCAAACGCG; TGTTGGCCAGGGACTTTGCTAGAA( AACCCTCC | GCTT       | AACC | N    |      |
| 10*Chr1_145_IS407A_A                      | N    | PRL20       | 10 | 2676258-2677493 | Chr1 | IS407A | AAGCC TGACCTGCCCCCTACA ATGAAGAAGCGCTTTACGCGCCCGCAAGCCAAACGCG; TGTTGGCCAGGGACTTTGCTAGAA( GGCTTCG  | ATAG       | GGCT | N    |      |
| 2*Chr1_150_IS407A_2*Chr1_2b_IS407A_A      | D-R  | fmh         | 2  | 2681776-2683011 | Chr1 | IS407A | ATCGC(TGACCTGCCCCCTACA ATGAAGAAGCGCTTTACGCGCCCGCAAGCCAAACGCG; TGTTGGCCAGGGACTTTGCTAGAA( ACGAGCT  | CAAG       | ACGA | N    |      |
| 8*Chr1_149_IS407A_8*Chr1_150_IS407A_A     | D    | 2002721280  | 8  | 2686821-2687644 | Chr1 | IS407A | ATCGC(TGACCTGCCCCCTACA ATGAAGAAGCGCTTTACGCGCCCGCAAGCCAAACGCG; TGTTGGCC#                          | #contig_br | CAAG | #con | N.D. |
| 6*Chr1_126b_IS407A_6*Chr1_135_IS407A_A    | D-R  | NCTC_10229  | 6  | 2690743-2691978 | Chr1 | IS407A | CTGGA(TGACCTGCCCCCTACA ATGAAGAAGCGCTTTACGCGCCCGCAAGCCAAACGCG; TGTTGGCCAGGGACTTTGCTAGAA( CCGGAA   | ATCG       | CCCG | N    |      |
| 4*Chr1_152b_IS407A_4*Chr1_157_IS407A_A    | D-R  | gb8_horse_4 | 4  | 2692936-2694171 | Chr1 | IS407A | GAAAC TGACCTGCCCCCTACA ATGAAGAAGCGCTTTACGCGCCCGCAAGCCAAACGCG; TGTTGGCCAGGGACTTTGCTAGAA( GCCTGATC | GGTC       | GCCT | N    |      |
| 7*Chr1_150_IS407A_7*Chr1_5_IS407A_A       | D-R  | NCTC_10247  | 7  | 2695410-2696645 | Chr1 | IS407A | ATCGC(TGACCTGCCCCCTACA ATGAAGAAGCGCTTTACGCGCCCGCAAGCCAAACGCG; TGTTGGCCAGGGACTTTGCTAGAA( CCGCCG   | CAAG       | CGCG | N    |      |
| 3*Chr1_150_IS407A_3*Chr1_2b_IS407A_A      | D-R  | JHU         | 3  | 2697886-2699121 | Chr1 | IS407A | ATCGC(TGACCTGCCCCCTACA ATGAAGAAGCGCTTTACGCGCCCGCAAGCCAAACGCG; TGTTGGCCAGGGACTTTGCTAGAA( ACGAGCT  | CAAG       | ACGA | N    |      |
| 1*Chr1_152b_IS407A_1*Chr1_157_IS407A_A    | D-R  | ATCC_23344  | 1  | 2705320-2706555 | Chr1 | IS407A | GAAAC TGACCTGCCCCCTACA ATGAAGAAGCGCTTTACGCGCCCGCAAGCCAAACGCG; TGTTGGCCAGGGACTTTGCTAGAA( GCCTGATC | GGTC       | GCCT | N    |      |
| 7*Chr1_48_IS407A_7*Chr1_58b_IS407A_A      | D-R  | NCTC_10247  | 7  | 2706334-271869  | Chr1 | IS407A | CGTCG(TGACCTGCCCCCTACA ATGAAGAAGCGCTTTACGCGCCCGCAAGCCAAACGCG; TGTTGGCCAGGGACTTTGCTAGAA( GAATGG   | GTGA       | GAAG | N    |      |
| 6*Chr1_134_IS407A_B                       | N    | NCTC_10229  | 6  | 2724302-2725537 | Chr1 | IS407A | TTCCG(TGACCTGCCCCCTACA ATGAAGAAGCGCTTTACGCGCCCGCAAGCCAAACGCG; TGTTGGCCAGGGACTTTGCTAGAA( GACAGCG  | ACAC       | GCAC | N    |      |
| 10*Chr1_154b_IS407A_A                     | R    | PRL20       | 10 | 2728534-2729133 | Chr1 | IS407A | #contig ~~~~~ AGGACTTTGCTAGAA( AACCCTCC                                                          | #          | AACC | N.D. |      |
| 4*Chr1_154a_IS407A_4*Chr1_4_IS407A_B      | D-R  | gb8_horse_4 | 4  | 2739471-2740706 | Chr1 | IS407A | GCAGC TGACCTGCCCCCTACA ATGAAGAAGCGCTTTACGCGCCCGCAAGCCAAACGCG; TGTTGGCCAGGGACTTTGCTAGAA( GACAGGG  | CCCC       | GACA | N    |      |
| 2*Chr1_152a_IS407A_2*Chr1_2a_IS407A_A     | R    | fmh         | 2  | 2748524-2749759 | Chr1 | IS407A | GATGC TGACCTGCCCCCTACA ATGAAGAAGCGCTTTACGCGCCCGCAAGCCAAACGCG; TGTTGGCCAGGGACTTTGCTAGAA( GGGACGC  | GACG       | GGGA | N    |      |
| 8*Chr1_158_IS407A_8*Chr1_5_IS407A_A       | D-R  | 2002721280  | 8  | 2749650-2750885 | Chr1 | IS407A | AACCC TGACCTGCCCCCTACA ATGAAGAAGCGCTTTACGCGCCCGCAAGCCAAACGCG; TGTTGGCCAGGGACTTTGCTAGAA( CCGCCG   | ATGG       | CGCA | N    |      |
| 1*Chr1_154a_IS407A_1*Chr1_4_IS407A_B      | D-R  | ATCC_23344  | 1  | 2752854-2754089 | Chr1 | IS407A | GCAGC TGACCTGCCCCCTACA ATGAAGAAGCGCTTTACGCGCCCGCAAGCCAAACGCG; TGTTGGCCAGGGACTTTGCTAGAA( GACAGGG  | CCCC       | GACA | N    |      |
| 10*Chr1_152b_IS407A_10*Chr1_157_IS407A_A  | D-R  | PRL20       | 10 | 2756293-2757528 | Chr1 | IS407A | GAAAC TGACCTGCCCCCTACA ATGAAGAAGCGCTTTACGCGCCCGCAAGCCAAACGCG; TGTTGGCCAGGGACTTTGCTAGAA( GATGCCT  | GGTC       | GATG | N    |      |
| 3*Chr1_152a_IS407A_3*Chr1_2a_IS407A_A     | R    | JHU         | 3  | 2764627-2765862 | Chr1 | IS407A | GATGC TGACCTGCCCCCTACA ATGAAGAAGCGCTTTACGCGCCCGCAAGCCAAACGCG; TGTTGGCCAGGGACTTTGCTAGAA( GGGACGC  | GACG       | GGGA | N    |      |
| 4*Chr1_150_IS407A_4*Chr1_2b_IS407A_A      | D-R  | gb8_horse_4 | 4  | 2773025-2774260 | Chr1 | IS407A | ATCGC(TGACCTGCCCCCTACA ATGAAGAAGCGCTTTACGCGCCCGCAAGCCAAACGCG; TGTTGGCCAGGGACTTTGCTAGAA( ACGAGCT  | CAAG       | ACGA | N    |      |
| 2*Chr1_158_IS407A_A                       | D-R  | fmh         | 2  | 2778339-2779754 | Chr1 | IS407A | AACCC TGACCTGCCCCCTACA ATGAAGAAGCGCTTTACGCGCCCGCAAGCCAAACGCG; TGTTGGCCAGGGACTTTGCTAGAA( ATCCACTC | ATGG       | ATCC | N    |      |
| 5*Chr1_145_IS407A_A                       | N    | ATCC_10399  | 5  | 2780241-2781476 | Chr1 | IS407A | AAGCC TGACCTGCCCCCTACA ATGAAGAAGCGCTTTACGCGCCCGCAAGCCAAACGCG; TGTTGGCCAGGGACTTTGCTAGAA( GCTTCG   | ATAG       | GGCT | N    |      |
| 1*Chr1_150_IS407A_1*Chr1_2b_IS407A_A      | D-R  | ATCC_23344  | 1  | 2786407-2787642 | Chr1 | IS407A | ATCGC(TGACCTGCCCCCTACA ATGAAGAAGCGCTTTACGCGCCCGCAAGCCAAACGCG; TGTTGGCCAGGGACTTTGCTAGAA( ACGAGCT  | CAAG       | ACGA | N    |      |
| 3*Chr1_158_IS407A_A                       | D-R  | JHU         | 3  | 2793466-2794701 | Chr1 | IS407A | AACCC TGACCTGCCCCCTACA ATGAAGAAGCGCTTTACGCGCCCGCAAGCCAAACGCG; TGTTGGCCAGGGACTTTGCTAGAA( ATCCACTC | ATGG       | ATCC | N    |      |
| 8*Chr1_2a_IS407A_A                        | null | 2002721280  | 8  | 2797539-2798774 | Chr1 | IS407A | GATGC TGACCTGCCCCCTACA ATGAAGAAGCGCTTTACGCGCCCGCAAGCCAAACGCG; TGTTGGCCAGGGACTTTGCTAGAA( ACGAGCT  | GACG       | ACGA | N    |      |
| 6*Chr1_115a_IS407A_6*Chr1_132b_IS407A_A   | R    | NCTC_10229  | 6  | 2801289-2802524 | Chr1 | IS407A | TTCCG(TGACCTGCCCCCTACA ATGAAGAAGCGCTTTACGCGCCCGCAAGCCAAACGCG; TGTTGGCCAGGGACTTTGCTAGAA( GGACGG   | GATG       | GGAC | N    |      |
| 9*Chr1_10_IS407A_A                        | N    | SAVP1       | 9  | 2801953-2803188 | Chr1 | IS407A | CGCCA TGACCTGCCCCCTACA ATGAAGAAGCGCTTTACGCGCCCGCAAGCCAAACGCG; TGTTGGCCAGGGACTTTGCTAGAA( CCTATGC  | CCCT       | CCCT | Y    |      |
| 10*Chr1_152a_IS407A_10*Chr1_154a_IS407A_A | R    | PRL20       | 10 | 2803324-2804559 | Chr1 | IS407A | CCTGG(TGACCTGCCCCCTACA ATGAAGAAGCGCTTTACGCGCCCGCAAGCCAAACGCG; TGTTGGCCAGGGACTTTGCTAGAA( GGGACGC  | AAAA       | GGGA | N    |      |
| 9*Chr1_7_IS407A_A_9*Chr1_8_IS407A_A       | D    | SAVP1       | 9  | 2819545-2820780 | Chr1 | IS407A | CGCGC TGACCTGCCCCCTACA ATGAAGAAGCGCTTTACGCGCCCGCAAGCCAAACGCG; TGTTGGCCAGGGACTTTGCTAGAA( TTCCAGT  | GACG       | TTTC | N    |      |
| 5*Chr1_154b_IS407A_A                      | R    | ATCC_10399  | 5  | 2820240-2821475 | Chr1 | IS407A | CGCGC TGACCTGCCCCCTACA ATGAAGAAGCGCTTTACGCGCCCGCAAGCCAAACGCG; TGTTGGCCAGGGACTTTGCTAGAA( AACCCTCC | GCTT       | AACC | N    |      |
| 4*Chr1_33_IS407A_4*Chr1_34_IS407A_A       | D    | gb8_horse_4 | 4  | 282223-283458   | Chr1 | IS407A | CGCCA TGACCTGCCCCCTACA ATGAAGAAGCGCTTTACGCGCCCGCAAGCCAAACGCG; TGTTGGCCAGGGACTTTGCTAGAA( GCAACGG  | CAAT       | GCAA | N    |      |
| 2*Chr1_149_IS407A_2*Chr1_160b_IS407A_A    | D-R  | fmh         | 2  | 2823968-2825203 | Chr1 | IS407A | CGCGC TGACCTGCCCCCTACA ATGAAGAAGCGCTTTACGCGCCCGCAAGCCAAACGCG; TGTTGGCCAGGGACTTTGCTAGAA( CCTCACG  | GTCC       | GTCC | N    |      |
| 10*Chr1_150_IS407A_10*Chr1_2b_IS407A_A    | D-R  | PRL20       | 10 | 2830709-2831944 | Chr1 | IS407A | CGTGC(TGACCTGCCCCCTACA ATGAAGAAGCGCTTTACGCGCCCGCAAGCCAAACGCG; TGTTGGCCAGGGACTTTGCTAGAA( ACGAGCT  | GTCC       | ACGA | N    |      |
| 9*Chr1_30_IS407A_9*Chr1_6_IS407A_A        | D-R  | SAVP1       | 9  | 2832213-2833448 | Chr1 | IS407A | TTGAG(TGACCTGCCCCCTACA ATGAAGAAGCGCTTTACGCGCCCGCAAGCCAAACGCG; TGTTGGCCAGGGACTTTGCTAGAA( GCGCGCA  | TCGG       | CGCC | N    |      |
| 1*Chr1_33_IS407A_1*Chr1_34_IS407A_A       | D    | ATCC_23344  | 1  | 283548-284783   | Chr1 | IS407A | CGCCA TGACCTGCCCCCTACA ATGAAGAAGCGCTTTACGCGCCCGCAAGCCAAACGCG; TGTTGGCCAGGGACTTTGCTAGAA( GCAACGG  | CAAT       | GCAA | N    |      |
| 3*Chr1_149_IS407A_3*Chr1_160b_IS407A_A    | D-R  | JHU         | 3  | 2839030-2840265 | Chr1 | IS407A | CGCGC TGACCTGCCCCCTACA ATGAAGAAGCGCTTTACGCGCCCGCAAGCCAAACGCG; TGTTGGCCAGGGACTTTGCTAGAA( CCTCACG  | GTCC       | CCTC | N    |      |
| 4*Chr1_152a_IS407A_4*Chr1_2a_IS407A_A     | R    | gb8_horse_4 | 4  | 2839656-2840891 | Chr1 | IS407A | GATGC TGACCTGCCCCCTACA ATGAAGAAGCGCTTTACGCGCCCGCAAGCCAAACGCG; TGTTGGCCAGGGACTTTGCTAGAA( GGGACGC  | GACG       | GGGA | N    |      |
| 1*Chr1_152a_IS407A_1*Chr1_2a_IS407A_A     | R    | ATCC_23344  | 1  | 2853155-2854390 | Chr1 | IS407A | GATGC TGACCTGCCCCCTACA ATGAAGAAGCGCTTTACGCGCCCGCAAGCCAAACGCG; TGTTGGCCAGGGACTTTGCTAGAA( GGGACGC  | GACG       | GGGA | N    |      |
| 5*Chr1_152b_IS407A_5*Chr1_157_IS407A_A    | D-R  | ATCC_10399  | 5  | 2855128-2856363 | Chr1 | IS407A | GAAAC TGACCTGCCCCCTACA ATGAAGAAGCGCTTTACGCGCCCGCAAGCCAAACGCG; TGTTGGCCAGGGACTTTGCTAGAA( CCTCATC  | GGTC       | GCCT | N    |      |
| 4*Chr1_158_IS407A_A                       | D-R  | gb8_horse_4 | 4  | 2868523-2869758 | Chr1 | IS407A | AACCC TGACCTGCCCCCTACA ATGAAGAAGCGCTTTACGCGCCCGCAAGCCAAACGCG; TGTTGGCCAGGGACTTTGCTAGAA( ATCCACTC | ATGG       | ATCC | N    |      |
| 6*Chr1_114_IS407A_A                       | N    | NCTC_10229  | 6  | 2872519-2873754 | Chr1 | IS407A | TGATT(TGACCTGCCCCCTACA ATGAAGAAGCGCTTTACGCGCCCGCAAGCCAAACGCG; TGTTGGCCAGGGACTTTGCTAGAA( ATCCCG   | GAAG       | GATC | N    |      |
| 1*Chr1_158_IS407A_A                       | D-R  | ATCC_23344  | 1  | 2881994-2883229 | Chr1 | IS407A | AACCC TGACCTGCCCCCTACA ATGAAGAAGCGCTTTACGCGCCCGCAAGCCAAACGCG; TGTTGGCCAGGGACTTTGCTAGAA( ATCCACTC | ATGG       | ATCC | N    |      |
| 6*Chr1_113_IS407A_A                       | N    | NCTC_10229  | 6  | 2886128-2887363 | Chr1 | IS407A | TTTGT(TGACCTGCCCCCTACA ATGAAGAAGCGCTTTACGCGCCCGCAAGCCAAACGCG; TGTTGGCCAGGGACTTTGCTAGAA( ATCTACCT | CCTC       | ATCT | N    |      |
| 9*Chr1_15_IS407A_C                        | N    | SAVP1       | 9  | 2888034-2889269 | Chr1 | IS407A | CGCCG TGACCTGCCCCCTACA ATGAAGAAGCGCTTTACGCGCCCGCAAGCCAAACGCG; TGTTGGCCAGGGACTTTGCTAGAA( TACTGGC  | TTAC       | TTAC | Y    |      |
| 2*Chr1_160a_IS407A_2*Chr1_161_IS407A_A    | D-R  | fmh         | 2  | 2889155-2890390 | Chr1 | IS407A | TACGA(TGACCTGCCCCCTACA ATGAAGAAGCGCTTTACGCGCCCGCAAGCCAAACGCG; TGTTGGCCAGGGACTTTGCTAGAA( GTCCGG   | TTTT       | GTCC | N    |      |
| 10*Chr1_158_IS407A_A                      | D-R  | PRL20       | 10 | 2898114-2899349 | Chr1 | IS407A | CACCA(TGACCTGCCCCCTACA ATGAAGAAGCGCTTTACGCGCCCGCAAGCCAAACGCG; TGTTGGCCAGGGACTTTGCTAGAA( AATCCACT | CTTC       | AATC | N    |      |
| 5*Chr1_152a_IS407A_5*Chr1_154a_IS407A_A   | R    | ATCC_10399  | 5  | 2902195-2903430 | Chr1 | IS407A | GCAGC TGACCTGCCCCCTACA ATGAAGAAGCGCTTTACGCGCCCGCAAGCCAAACGCG; TGTTGGCCAGGGACTTTGCTAGAA( GGGACGC  | CCCC       | GGGA | N    |      |
| 3*Chr1_160a_IS407A_3*Chr1_161_IS407A_A    | D-R  | JHU         | 3  | 2904664-2905899 | Chr1 | IS407A | TACGA(TGACCTGCCCCCTACA ATGAAGAAGCGCTTTACGCGCCCGCAAGCCAAACGCG; TGTTGGCCAGGGACTTTGCTAGAA( GTCCGG   | TTTT       | GTCC | N    |      |
| 4*Chr1_149_IS407A_4*Chr1_160b_IS407A_A    | D-R  | gb8_horse_4 | 4  | 2913457-2914692 | Chr1 | IS407A | CGCGC TGACCTGCCCCCTACA ATGAAGAAGCGCTTTACGCGCCCGCAAGCCAAACGCG; TGTTGGCCAGGGACTTTGCTAGAA( CCTCACG  | GTCC       | CCTC | N    |      |

|                                        |     |             |    |                 |      |        |        |                  |                                                                          |      |      |   |
|----------------------------------------|-----|-------------|----|-----------------|------|--------|--------|------------------|--------------------------------------------------------------------------|------|------|---|
| 7*Chr1_160a_IS40;7*Chr1_29_IS407A_A    | D-R | NCTC_10247  | 7  | 2917547-2918782 | Chr1 | IS407A | ATTTAT | TGACCTGCCCCCTACA | ATGAAGAAGCGCTTTACGCGCCCGCAAGCCAAACGCG;TGTTGGCCAGGGACTTTGCTAGAA(GTCCGGG)  | CATT | GTCC | N |
| 1*Chr1_149_IS407;1*Chr1_160b_IS407A_A  | D-R | ATCC_23344  | 1  | 2926926-2928161 | Chr1 | IS407A | CGCGC  | TGACCTGCCCCCTACA | ATGAAGAAGCGCTTTACGCGCCCGCAAGCCAAACGCG;TGTTGGCCAGGGACTTTGCTAGAA(CCTCACG)  | GTCC | CCTC | N |
| 8*Chr1_162_IS407;8*Chr1_29_IS407A_A    | D-R | 2002721280  | 8  | 2934200-2935435 | Chr1 | IS407A | ATTTAT | TGACCTGCCCCCTACA | ATGAAGAAGCGCTTTACGCGCCCGCAAGCCAAACGCG;TGTTGGCCAGGGACTTTGCTAGAA(ATCAGCA)  | CATT | ATCA | N |
| 10*Chr1_149_IS40;10*Chr1_160a_IS407A_A | D-R | PRL20       | 10 | 2944666-2945881 | Chr1 | IS407A | CGCCG  | TGACCTGCCCCCTACA | ATGAAGAAGCGCTTTACGCGCCCGCAAGCCAAACGCG;TGTTGGCCAGGGACTTTGCTAGAA(GTCCGGG)  | GTCC | GTCC | Y |
| 6*Chr1_112_IS407;6*Chr1_49_IS407A_A    | D-R | NCTC_10229  | 6  | 2955982-2957217 | Chr1 | IS407A | GCCCT  | TGACCTGCCCCCTACA | ATGAAGAAGCGCTTTACGCGCCCGCAAGCCAAACGCG;TGTTGGCCAGGGACTTTGCTAGAA(TTGACGC)  | CCCC | TTGA | N |
| 5*Chr1_150_IS407;5*Chr1_2b_IS407A_A    | D-R | ATCC_10399  | 5  | 2968933-2970168 | Chr1 | IS407A | ATCGC  | TGACCTGCCCCCTACA | ATGAAGAAGCGCTTTACGCGCCCGCAAGCCAAACGCG;TGTTGGCCAGGGACTTTGCTAGAA(ACGAGCT)  | CAAG | ACGA | N |
| 4*Chr1_160a_IS40;4*Chr1_161_IS407A_A   | D-R | gb8_horse_4 | 4  | 2977682-2978917 | Chr1 | IS407A | TACGA  | TGACCTGCCCCCTACA | ATGAAGAAGCGCTTTACGCGCCCGCAAGCCAAACGCG;TGTTGGCCAGGGACTTTGCTAGAA(GTCCGGG)  | TTTT | GTCC | N |
| 1*Chr1_160a_IS40;1*Chr1_161_IS407A_A   | D-R | ATCC_23344  | 1  | 2991437-2992672 | Chr1 | IS407A | TACGA  | TGACCTGCCCCCTACA | ATGAAGAAGCGCTTTACGCGCCCGCAAGCCAAACGCG;TGTTGGCCAGGGACTTTGCTAGAA(GTCCGGG)  | TTTT | ATCC | N |
| 4*Chr1_35a_IS407A_A                    | N   | gb8_horse_4 | 4  | 299583-300818   | Chr1 | IS407A | GTGAA  | TGACCTGCCCCCTACA | ATGAAGAAGCGCTTTACGCGCCCGCAAGCCAAACGCG;TGTTGGCCAGGGACTTTGCTAGAA(CCGGAAC)  | GATT | CCGG | N |
| 9*Chr1_18a_IS407A_A                    | N   | SAVP1       | 9  | 2998066-2999931 | Chr1 | IS407A | CGTCG  | TGACCTGCCCCCTACA | ATGAAGAAGCGCTTTACGCGCCCGCAAGCCAAACGCG;TGTTGGCCAGGGACTTTGCTAGAA(CACCGGC)  | CACC | CACC | Y |
| 5*Chr1_2a_IS407A;5*Chr1_4_IS407A_B     | D-R | ATCC_10399  | 5  | 3002482-3003717 | Chr1 | IS407A | GATGC  | TGACCTGCCCCCTACA | ATGAAGAAGCGCTTTACGCGCCCGCAAGCCAAACGCG;TGTTGGCCAGGGACTTTGCTAGAA(ATCAGCA)  | GACG | GACA | N |
| 2*Chr1_162_IS407;2*Chr1_55_IS407A_A    | D-R | fmh         | 2  | 3008620-3009855 | Chr1 | IS407A | ATCAC  | TGACCTGCCCCCTACA | ATGAAGAAGCGCTTTACGCGCCCGCAAGCCAAACGCG;TGTTGGCCAGGGACTTTGCTAGAA(ATCAGCA)  | GCGG | ATCA | N |
| 10*Chr1_161_IS40;10*Chr1_2a_IS407A_A   | D-R | PRL20       | 10 | 3008966-3010201 | Chr1 | IS407A | GATGC  | TGACCTGCCCCCTACA | ATGAAGAAGCGCTTTACGCGCCCGCAAGCCAAACGCG;TGTTGGCCAGGGACTTTGCTAGAA(GTGCAAA)  | GACG | GGTC | N |
| 1*Chr1_35a_IS407A_A                    | N   | ATCC_23344  | 1  | 300908-302143   | Chr1 | IS407A | GTGAA  | TGACCTGCCCCCTACA | ATGAAGAAGCGCTTTACGCGCCCGCAAGCCAAACGCG;TGTTGGCCAGGGACTTTGCTAGAA(CGGGAAC)  | GATT | CCGG | N |
| 2*Chr1_56_IS407A;2*Chr1_65a_IS407A_A   | D-R | fmh         | 2  | 3022164-3023399 | Chr1 | IS407A | TGGAA  | TGACCTGCCCCCTACA | ATGAAGAAGCGCTTTACGCGCCCGCAAGCCAAACGCG;TGTTGGCCAGGGACTTTGCTAGAA(CGGGGCA)  | GCGG | ACGG | N |
| 3*Chr1_162_IS407;3*Chr1_55_IS407A_A    | D-R | JHU         | 3  | 3024998-3026233 | Chr1 | IS407A | ATCAC  | TGACCTGCCCCCTACA | ATGAAGAAGCGCTTTACGCGCCCGCAAGCCAAACGCG;TGTTGGCCAGGGACTTTGCTAGAA(ATCAGCA)  | GCGG | ATCA | N |
| 5*Chr1_158_IS407A_A                    | D-R | ATCC_10399  | 5  | 3031244-3032479 | Chr1 | IS407A | AACCC  | TGACCTGCCCCCTACA | ATGAAGAAGCGCTTTACGCGCCCGCAAGCCAAACGCG;TGTTGGCCAGGGACTTTGCTAGAA(ATCCACT)  | ATGG | ATCC | N |
| 7*Chr1_161_IS407;7*Chr1_162_IS407A_A   | D-R | NCTC_10247  | 7  | 3038317-3039552 | Chr1 | IS407A | TACGA  | TGACCTGCCCCCTACA | ATGAAGAAGCGCTTTACGCGCCCGCAAGCCAAACGCG;TGTTGGCCAGGGACTTTGCTAGAA(ATCAGCA)  | TTTT | ATCA | N |
| 3*Chr1_56_IS407A;3*Chr1_65a_IS407A_A   | D-R | JHU         | 3  | 3038542-3039777 | Chr1 | IS407A | TGGAA  | TGACCTGCCCCCTACA | ATGAAGAAGCGCTTTACGCGCCCGCAAGCCAAACGCG;TGTTGGCCAGGGACTTTGCTAGAA(GGGGGCA)  | GCGG | GGGG | N |
| 9*Chr1_20_IS407A;9*Chr1_21_IS407A_A    | D   | SAVP1       | 9  | 3042799-3044034 | Chr1 | IS407A | ATGTC  | TGACCTGCCCCCTACA | ATGAAGAAGCGCTTTACGCGCCCGCAAGCCAAACGCG;TGTTGGCCAGGGACTTTGCTAGAA(GTCCACG)  | CCGG | GTCC | N |
| 6*Chr1_54_IS407A;6*Chr1_155_IS407A_A   | D   | NCTC_10229  | 6  | 3059581-3060816 | Chr1 | IS407A | ATCAC  | TGACCTGCCCCCTACA | ATGAAGAAGCGCTTTACGCGCCCGCAAGCCAAACGCG;TGTTGGCCAGGGACTTTGCTAGAA(GCGGGTC)  | GCGT | GCGG | N |
| 6*Chr1_111_IS407;6*Chr1_56_IS407A_A    | D-R | NCTC_10229  | 6  | 3073105-3074340 | Chr1 | IS407A | TGGAA  | TGACCTGCCCCCTACA | ATGAAGAAGCGCTTTACGCGCCCGCAAGCCAAACGCG;TGTTGGCCAGGGACTTTGCTAGAA(CAGGCGC)  | GCGG | CAGG | N |
| 9*Chr1_154b_IS407A_A                   | R   | SAVP1       | 9  | 3075556-3076791 | Chr1 | IS407A | GGCTT  | TGACCTGCCCCCTACA | ATGAAGAAGCGCTTTACGCGCCCGCAAGCCAAACGCG;TGTTGGCCAGGGACTTTGCTAGAA(AACCTCC)  | GCTT | AACC | N |
| 5*Chr1_149_IS407;5*Chr1_160b_IS407A_A  | D-R | ATCC_10399  | 5  | 3076183-3077418 | Chr1 | IS407A | TCGAA  | TGACCTGCCCCCTACA | ATGAAGAAGCGCTTTACGCGCCCGCAAGCCAAACGCG;TGTTGGCCAGGGACTTTGCTAGAA(GGACCAC)  | GAGG | GGAC | N |
| 2*Chr1_156_IS407A;2*Chr1_64b_IS407A_A  | D-R | fmh         | 2  | 3084797-3086032 | Chr1 | IS407A | ATTTAT | TGACCTGCCCCCTACA | ATGAAGAAGCGCTTTACGCGCCCGCAAGCCAAACGCG;TGTTGGCCAGGGACTTTGCTAGAA(TCGCTTCT) | CATT | TCGC | N |
| 4*Chr1_162_IS407;4*Chr1_55_IS407A_A    | D-R | gb8_horse_4 | 4  | 3096934-3098169 | Chr1 | IS407A | ATCAC  | TGACCTGCCCCCTACA | ATGAAGAAGCGCTTTACGCGCCCGCAAGCCAAACGCG;TGTTGGCCAGGGACTTTGCTAGAA(ATCAGCA)  | GCGG | ATCA | N |
| 3*Chr1_29_IS407A;3*Chr1_64b_IS407A_A   | D-R | JHU         | 3  | 3101880-3103115 | Chr1 | IS407A | ATTTAT | TGACCTGCCCCCTACA | ATGAAGAAGCGCTTTACGCGCCCGCAAGCCAAACGCG;TGTTGGCCAGGGACTTTGCTAGAA(TCGCTTCT) | CATT | TCGC | N |
| 7*Chr1_149_IS407;7*Chr1_160b_IS407A_A  | D-R | NCTC_10247  | 7  | 3102821-3104056 | Chr1 | IS407A | CGCGC  | TGACCTGCCCCCTACA | ATGAAGAAGCGCTTTACGCGCCCGCAAGCCAAACGCG;TGTTGGCCAGGGACTTTGCTAGAA(CCTCACG)  | GATT | CCTC | N |
| 9*Chr1_152b_IS40;9*Chr1_157_IS407A_A   | D-R | SAVP1       | 9  | 3109637-3110872 | Chr1 | IS407A | GAAAC  | TGACCTGCCCCCTACA | ATGAAGAAGCGCTTTACGCGCCCGCAAGCCAAACGCG;TGTTGGCCAGGGACTTTGCTAGAA(GATGCCT)  | GGTC | GATG | N |
| 4*Chr1_56_IS407A;4*Chr1_65a_IS407A_A   | D-R | gb8_horse_4 | 4  | 3110478-3111713 | Chr1 | IS407A | TGGAA  | TGACCTGCCCCCTACA | ATGAAGAAGCGCTTTACGCGCCCGCAAGCCAAACGCG;TGTTGGCCAGGGACTTTGCTAGAA(GGGGGCA)  | GCGG | GGGG | N |
| 1*Chr1_162_IS407;1*Chr1_55_IS407A_A    | D-R | ATCC_23344  | 1  | 3110701-3111936 | Chr1 | IS407A | ATCAC  | TGACCTGCCCCCTACA | ATGAAGAAGCGCTTTACGCGCCCGCAAGCCAAACGCG;TGTTGGCCAGGGACTTTGCTAGAA(ATCAGCA)  | GCGG | ATCA | N |
| 1*Chr1_56_IS407A;1*Chr1_65a_IS407A_A   | D-R | ATCC_23344  | 1  | 3124245-3125480 | Chr1 | IS407A | TGGAA  | TGACCTGCCCCCTACA | ATGAAGAAGCGCTTTACGCGCCCGCAAGCCAAACGCG;TGTTGGCCAGGGACTTTGCTAGAA(GGGGGCA)  | GCGG | GGGG | N |
| 8*Chr1_145_IS407A_A                    | N   | 2002721280  | 8  | 3139134-3140369 | Chr1 | IS407A | CAAGC  | TGACCTGCCCCCTACA | ATGAAGAAGCGCTTTACGCGCCCGCAAGCCAAACGCG;TGTTGGCCAGGGACTTTGCTAGAA(ATATCGCC) | GAAT | CTAT | N |
| 5*Chr1_161_IS407;5*Chr1_162_IS407A_A   | D   | ATCC_10399  | 5  | 3140813-3142048 | Chr1 | IS407A | TACGA  | TGACCTGCCCCCTACA | ATGAAGAAGCGCTTTACGCGCCCGCAAGCCAAACGCG;TGTTGGCCAGGGACTTTGCTAGAA(ATCAGCA)  | TTTT | ATCA | N |
| 7*Chr1_158_IS407A_A                    | D-R | NCTC_10247  | 7  | 3147756-3148991 | Chr1 | IS407A | AACCC  | TGACCTGCCCCCTACA | ATGAAGAAGCGCTTTACGCGCCCGCAAGCCAAACGCG;TGTTGGCCAGGGACTTTGCTAGAA(ATCCACT)  | ATGG | ATCC | N |
| 10*Chr1_162_IS40;10*Chr1_4_IS407A_B    | D-R | PRL20       | 10 | 3148182-3149417 | Chr1 | IS407A | ACGTT  | TGACCTGCCCCCTACA | ATGAAGAAGCGCTTTACGCGCCCGCAAGCCAAACGCG;TGTTGGCCAGGGACTTTGCTAGAA(CGGCAC)   | TGAT | GCGC | N |
| 8*Chr1_7_IS407A;8*Chr1_8_IS407A_A      | D   | 2002721280  | 8  | 3153325-3154560 | Chr1 | IS407A | GGCGC  | TGACCTGCCCCCTACA | ATGAAGAAGCGCTTTACGCGCCCGCAAGCCAAACGCG;TGTTGGCCAGGGACTTTGCTAGAA(TGAGAGC)  | GACG | TGAG | N |
| 9*Chr1_152a_IS40;9*Chr1_154a_IS407A_A  | R   | SAVP1       | 9  | 3157171-3158406 | Chr1 | IS407A | GACG   | TGACCTGCCCCCTACA | ATGAAGAAGCGCTTTACGCGCCCGCAAGCCAAACGCG;TGTTGGCCAGGGACTTTGCTAGAA(GGGAGCC)  | CCCC | GGGA | N |
| 8*Chr1_30_IS407A;8*Chr1_6_IS407A_A     | D-R | 2002721280  | 8  | 3166175-3167410 | Chr1 | IS407A | TTGAG  | TGACCTGCCCCCTACA | ATGAAGAAGCGCTTTACGCGCCCGCAAGCCAAACGCG;TGTTGGCCAGGGACTTTGCTAGAA(CGCGCA)   | TCGG | CGCC | N |
| 4*Chr1_29_IS407A;4*Chr1_64b_IS407A_A   | D-R | gb8_horse_4 | 4  | 3172259-3173494 | Chr1 | IS407A | ATTTAT | TGACCTGCCCCCTACA | ATGAAGAAGCGCTTTACGCGCCCGCAAGCCAAACGCG;TGTTGGCCAGGGACTTTGCTAGAA(TCGCTTCT) | CATT | TCGC | N |
| 1*Chr1_29_IS407A;1*Chr1_64b_IS407A_A   | D-R | ATCC_23344  | 1  | 3186007-3187242 | Chr1 | IS407A | ATTTAT | TGACCTGCCCCCTACA | ATGAAGAAGCGCTTTACGCGCCCGCAAGCCAAACGCG;TGTTGGCCAGGGACTTTGCTAGAA(TCGCTTCT) | CATT | TCGC | N |
| 5*Chr1_33_IS407A;5*Chr1_35a_IS407A_A   | D-R | ATCC_10399  | 5  | 320768-322003   | Chr1 | IS407A | CCGCA  | TGACCTGCCCCCTACA | ATGAAGAAGCGCTTTACGCGCCCGCAAGCCAAACGCG;TGTTGGCCAGGGACTTTGCTAGAA(CCGGAAC)  | CAAT | CCGG | N |
| 10*Chr1_64a_IS407A_A                   | N   | PRL20       | 10 | 3215347-3216582 | Chr1 | IS407A | AAGGA  | TGACCTGCCCCCTACA | ATGAAGAAGCGCTTTACGCGCCCGCAAGCCAAACGCG;TGTTGGCCAGGGACTTTGCTAGAA(CGCTTCT)  | GGGC | CGCT | N |
| 7*Chr1_145_IS407A_A                    | N   | NCTC_10247  | 7  | 3221599-3222834 | Chr1 | IS407A | AAGCC  | TGACCTGCCCCCTACA | ATGAAGAAGCGCTTTACGCGCCCGCAAGCCAAACGCG;TGTTGGCCAGGGACTTTGCTAGAA(GGCTTCC)  | ATAG | GGCT | N |
| 9*Chr1_150_IS407;9*Chr1_2b_IS407A_A    | D-R | SAVP1       | 9  | 3221731-3222966 | Chr1 | IS407A | CGTGC  | TGACCTGCCCCCTACA | ATGAAGAAGCGCTTTACGCGCCCGCAAGCCAAACGCG;TGTTGGCCAGGGACTTTGCTAGAA(ACGAGCT)  | GTCC | ACGA | N |
| 10*Chr1_29_IS407A_A                    | D-R | PRL20       | 10 | 3221885-3223120 | Chr1 | IS407A | ATTTAT | TGACCTGCCCCCTACA | ATGAAGAAGCGCTTTACGCGCCCGCAAGCCAAACGCG;TGTTGGCCAGGGACTTTGCTAGAA(CCTCACG)  | CATT | CCTC | N |
| 9*Chr1_162_IS407;9*Chr1_4_IS407A_B     | D-R | SAVP1       | 9  | 3255150-3256385 | Chr1 | IS407A | ACGTT  | TGACCTGCCCCCTACA | ATGAAGAAGCGCTTTACGCGCCCGCAAGCCAAACGCG;TGTTGGCCAGGGACTTTGCTAGAA(CGGCAC)   | TGAT | GCGC | N |
| 5*Chr1_160a_IS40;5*Chr1_29_IS407A_A    | D-R | ATCC_10399  | 5  | 3260016-3261251 | Chr1 | IS407A | ATTTAT | TGACCTGCCCCCTACA | ATGAAGAAGCGCTTTACGCGCCCGCAAGCCAAACGCG;TGTTGGCCAGGGACTTTGCTAGAA(GTCCGGG)  | CATT | GTCC | N |
| 7*Chr1_143b_IS40;7*Chr1_18a_IS407A_A   | R   | NCTC_10247  | 7  | 3290037-3291272 | Chr1 | IS407A | TTCCG  | TGACCTGCCCCCTACA | ATGAAGAAGCGCTTTACGCGCCCGCAAGCCAAACGCG;TGTTGGCCAGGGACTTTGCTAGAA(CACCGGC)  | ATCA | CACC | N |
| 10*Chr1_27_IS407A_B                    | N   | PRL20       | 10 | 3324203-3325438 | Chr1 | IS407A | ATGGG  | TGACCTGCCCCCTACA | ATGAAGAAGCGCTTTACGCGCCCGCAAGCCAAACGCG;TGTTGGCCAGGGACTTTGCTAGAA(GTGGGCG)  | GGTG | GGTG | Y |
| 8*Chr1_18a_IS407A_A                    | N   | 2002721280  | 8  | 3329244-3330479 | Chr1 | IS407A | CGTCG  | TGACCTGCCCCCTACA | ATGAAGAAGCGCTTTACGCGCCCGCAAGCCAAACGCG;TGTTGGCCAGGGACTTTGCTAGAA(CACGGGC)  | CACC | CACC | Y |
| 2*Chr1_18a_IS407A_A                    | N   | fmh         | 2  | 3361263-3362498 | Chr1 | IS407A | CGTCG  | TGACCTGCCCCCTACA | ATGAAGAAGCGCTTTACGCGCCCGCAAGCCAAACGCG;TGTTGGCCAGGGACTTTGCTAGAA(CACCGGC)  | CACC | CACC | Y |
| 8*Chr1_20_IS407A;8*Chr1_21_IS407A_A    | D   | 2002721280  | 8  | 3371851-3373086 | Chr1 | IS407A | CTGAC  | TGACCTGCCCCCTACA | ATGAAGAAGCGCTTTACGCGCCCGCAAGCCAAACGCG;TGTTGGCCAGGGACTTTGCTAGAA(CCGGGCG)  | GGAC | CCGG | N |
| 9*Chr1_160a_IS407A_A                   | N   | SAVP1       | 9  | 3374307-3375542 | Chr1 | IS407A | CGCGC  | TGACCTGCCCCCTACA | ATGAAGAAGCGCTTTACGCGCCCGCAAGCCAAACGCG;TGTTGGCCAGGGACTTTGCTAGAA(GTCCGGG)  | GTCC | GTCC | Y |
| 3*Chr1_18a_IS407A_A                    | N   | JHU         | 3  | 3379695-3380930 | Chr1 | IS407A | CGTCG  | TGACCTGCCCCCTACA | ATGAAGAAGCGCTTTACGCGCCCGCAAGCCAAACGCG;TGTTGGCCAGGGACTTTGCTAGAA(CACGGGC)  | CACC | CACC | Y |
| 5*Chr1_34_IS407A;5*Chr1_35b_IS407A_A   | D-R | ATCC_10399  | 5  | 338128-339363   | Chr1 | IS407A | GTGAA  | TGACCTGCCCCCTACA | ATGAAGAAGCGCTTTACGCGCCCGCAAGCCAAACGCG;TGTTGGCCAGGGACTTTGCTAGAA(GCAACGG)  | GATT | GCAA | N |
| 4*Chr1_37_IS407A_A                     | N   | gb8_horse_4 | 4  | 338280-339515   | Chr1 | IS407A | CGTCG  | TGACCTGCCCCCTACA | ATGAAGAAGCGCTTTACGCGCCCGCAAGCCAAACGCG;TGTTGGCCAGGGACTTTGCTAGAA(GACCCGG)  | CCAG | GACC | N |
| 6*Chr1_99_IS407A;6*Chr1_67_IS407A_A    | D-R | NCTC_10229  | 6  | 3386673-3387908 | Chr1 | IS407A | TTCA   | TGACCTGCCCCCTACA | ATGAAGAAGCGCTTTACGCGCCCGCAAGCCAAACGCG;TGTTGGCCAGGGACTTTGCTAGAA(GATCGAG)  | GTGG | GATC | N |





|                                       |     |             |    |               |      |        |                                                                                                    |      |      |      |
|---------------------------------------|-----|-------------|----|---------------|------|--------|----------------------------------------------------------------------------------------------------|------|------|------|
| 4*Chr1_115a_IS407A_A                  | N   | gb8_horse_4 | 4  | 526629-527864 | Chr1 | IS407A | TTCCGCTGACCTGCCCCCTACA ATGAAGAAGCGCTTTACGCGCCCGCAAGCCAAACGCG; TGTTGGCCAGGGACTTTGCTAGAA( CCTGCGA1   | GATG | CCTG | N    |
| 1*Chr1_115a_IS407A_A                  | N   | ATCC_23344  | 1  | 528284-529519 | Chr1 | IS407A | TTCCGCTGACCTGCCCCCTACA ATGAAGAAGCGCTTTACGCGCCCGCAAGCCAAACGCG; TGTTGGCCAGGGACTTTGCTAGAA( CCTGCGA1   | GATG | CCTG | N    |
| 7*Chr1_65a_IS407A_A                   | N   | NCTC_10247  | 7  | 533693-534928 | Chr1 | IS407A | GCGAC TGACCTGCCCCCTACA ATGAAGAAGCGCTTTACGCGCCCGCAAGCCAAACGCG; TGTTGGCCAGGGACTTTGCTAGAA( GGGGGCA    | GAAT | GGGG | N    |
| 5*Chr1_126a_IS407A_A                  | R   | ATCC_10399  | 5  | 548676-549911 | Chr1 | IS407A | AAAA TGACCTGCCCCCTACA ATGAAGAAGCGCTTTACGCGCCCGCAAGCCAAACGCG; TGTTGGCCAGGGACTTTGCTAGAA( TTTTTCAT    | AAGC | TTTT | N    |
| 5*Chr1_43b_IS407A_A                   | R   | ATCC_10399  | 5  | 551212-552447 | Chr1 | IS407A | CCCGT( TGACCTGCCCCCTACA ATGAAGAAGCGCTTTACGCGCCCGCAAGCCAAACGCG; TGTTGGCCAGGGACTTTGCTAGAA( CCTGCGA1  | CCCG | CCTG | N    |
| 9*Chr1_136_IS407A;9*Chr1_43a_IS407A_A | D-R | SAVP1       | 9  | 554720-555955 | Chr1 | IS407A | GATCG. TGACCTGCCCCCTACA ATGAAGAAGCGCTTTACGCGCCCGCAAGCCAAACGCG; TGTTGGCCAGGGACTTTGCTAGAA( CCGCAGC1  | GAAC | CCCG | N    |
| 2*Chr1_112_IS407A;2*Chr1_49_IS407A_A  | D-R | fmh         | 2  | 560092-561327 | Chr1 | IS407A | TCATC( TGACCTGCCCCCTACA ATGAAGAAGCGCTTTACGCGCCCGCAAGCCAAACGCG; TGTTGGCCAGGGACTTTGCTAGAA( GGGGTGA   | TCAA | GGGC | N    |
| 3*Chr1_112_IS407A;3*Chr1_49_IS407A_A  | D-R | JHU         | 3  | 563350-564585 | Chr1 | IS407A | TCATC( TGACCTGCCCCCTACA ATGAAGAAGCGCTTTACGCGCCCGCAAGCCAAACGCG; TGTTGGCCAGGGACTTTGCTAGAA( GGGGTGA   | TCAA | GGGC | N    |
| 5*Chr1_115a_IS407A_A                  | N   | ATCC_10399  | 5  | 565315-566550 | Chr1 | IS407A | TTCCGCTGACCTGCCCCCTACA ATGAAGAAGCGCTTTACGCGCCCGCAAGCCAAACGCG; TGTTGGCCAGGGACTTTGCTAGAA( GATGACA1   | GATG | GATG | Y    |
| 4*Chr1_30_IS407A;4*Chr1_6_IS407A_A    | D-R | gb8_horse_4 | 4  | 5679-6914     | Chr1 | IS407A | TTGAG( TGACCTGCCCCCTACA ATGAAGAAGCGCTTTACGCGCCCGCAAGCCAAACGCG; TGTTGGCCAGGGACTTTGCTAGAA( CGCCGCA   | TCGG | CGCC | N    |
| 10*Chr1_114_IS407A_A                  | N   | PRL20       | 10 | 570173-571408 | Chr1 | IS407A | ACGCG TGACCTGCCCCCTACA ATGAAGAAGCGCTTTACGCGCCCGCAAGCCAAACGCG; TGTTGGCCAGGGACTTTGCTAGAA( GATCCGG1   | GCAC | GATC | N    |
| 6*Chr1_98_IS407A;6*Chr1_66_IS407A_A   | D-R | NCTC_10229  | 6  | 575108-576343 | Chr1 | IS407A | CTCGT( TGACCTGCCCCCTACA ATGAAGAAGCGCTTTACGCGCCCGCAAGCCAAACGCG; TGTTGGCCAGGGACTTTGCTAGAA( GTAGGCA1  | CCCC | GTAG | N    |
| 9*Chr1_42b_IS407A_A                   | N   | SAVP1       | 9  | 575340-576499 | Chr1 | IS407A | GCGCT TGACCTGCCCCCTACA ATGAAGAAGCGCTTTACGCGCCCGCAAGCCAAACGCG; TGTTGGCCAGGGACTTTGCTAGAA( #can not f | TGCG | #can | N.D. |
| 10*Chr1_113_IS407A_A                  | N   | PRL20       | 10 | 582185-583420 | Chr1 | IS407A | TGATT( TGACCTGCCCCCTACA ATGAAGAAGCGCTTTACGCGCCCGCAAGCCAAACGCG; TGTTGGCCAGGGACTTTGCTAGAA( ATCTACCT  | GAAG | ATCT | N    |
| 7*Chr1_98_IS407A;7*Chr1_66_IS407A_A   | D-R | NCTC_10247  | 7  | 584779-586014 | Chr1 | IS407A | CTCGT( TGACCTGCCCCCTACA ATGAAGAAGCGCTTTACGCGCCCGCAAGCCAAACGCG; TGTTGGCCAGGGACTTTGCTAGAA( GTAGGCA1  | CCCG | GTAG | N    |
| 9*Chr1_35b_IS407A;9*Chr1_45b_IS407A_A | R   | SAVP1       | 9  | 588962-590197 | Chr1 | IS407A | GTGAA( TGACCTGCCCCCTACA ATGAAGAAGCGCTTTACGCGCCCGCAAGCCAAACGCG; TGTTGGCCAGGGACTTTGCTAGAA( GATGCTC1  | GATT | GATG | N    |
| 4*Chr1_114_IS407A_A                   | N   | gb8_horse_4 | 4  | 594406-595641 | Chr1 | IS407A | TGATT( TGACCTGCCCCCTACA ATGAAGAAGCGCTTTACGCGCCCGCAAGCCAAACGCG; TGTTGGCCAGGGACTTTGCTAGAA( GATCCGG1  | GAAG | GATC | N    |
| 9*Chr1_149_IS407A;9*Chr1_29_IS407A_A  | D-R | SAVP1       | 9  | 59560-60795   | Chr1 | IS407A | ATTTAT TGACCTGCCCCCTACA ATGAAGAAGCGCTTTACGCGCCCGCAAGCCAAACGCG; TGTTGGCCAGGGACTTTGCTAGAA( CCTCAG1   | CATT | CCTC | N    |
| 8*Chr1_64a_IS407A_A                   | N   | 2002721280  | 8  | 597797-599032 | Chr1 | IS407A | CTTGT( TGACCTGCCCCCTACA ATGAAGAAGCGCTTTACGCGCCCGCAAGCCAAACGCG; TGTTGGCCAGGGACTTTGCTAGAA( TCGTTCT   | TCGC | TCGC | Y    |
| 1*Chr1_114_IS407A_A                   | N   | ATCC_23344  | 1  | 599462-600697 | Chr1 | IS407A | TGATT( TGACCTGCCCCCTACA ATGAAGAAGCGCTTTACGCGCCCGCAAGCCAAACGCG; TGTTGGCCAGGGACTTTGCTAGAA( TCGTTCT   | GAAG | GATC | N    |
| 1*Chr1_30_IS407A;1*Chr1_6_IS407A_A    | D-R | ATCC_23344  | 1  | 6007-7242     | Chr1 | IS407A | TTGAG( TGACCTGCCCCCTACA ATGAAGAAGCGCTTTACGCGCCCGCAAGCCAAACGCG; TGTTGGCCAGGGACTTTGCTAGAA( CGCCGCA1  | TCGG | GATC | N    |
| 7*Chr1_35a_IS407A;7*Chr1_6_IS407A_A   | R   | NCTC_10247  | 7  | 6007-7242     | Chr1 | IS407A | TTGAG( TGACCTGCCCCCTACA ATGAAGAAGCGCTTTACGCGCCCGCAAGCCAAACGCG; TGTTGGCCAGGGACTTTGCTAGAA( GGGGCG1   | TCGG | GGGG | N    |
| 4*Chr1_113_IS407A_A                   | N   | gb8_horse_4 | 4  | 608048-609283 | Chr1 | IS407A | TTTGCT TGACCTGCCCCCTACA ATGAAGAAGCGCTTTACGCGCCCGCAAGCCAAACGCG; TGTTGGCCAGGGACTTTGCTAGAA( CAAGCG1   | CCTC | CAAC | N    |
| 1*Chr1_113_IS407A_A                   | N   | ATCC_23344  | 1  | 613104-614339 | Chr1 | IS407A | TTTGCT TGACCTGCCCCCTACA ATGAAGAAGCGCTTTACGCGCCCGCAAGCCAAACGCG; TGTTGGCCAGGGACTTTGCTAGAA( CAAGCG1   | CCTC | CAAC | N    |
| 2*Chr1_51_IS407A_B                    | N   | fmh         | 2  | 625205-626440 | Chr1 | IS407A | ATGGTG TGACCTGCCCCCTACA ATGAAGAAGCGCTTTACGCGCCCGCAAGCCAAACGCG; TGTTGGCCAGGGACTTTGCTAGAA( GATGCG1   | GATG | GATG | Y    |
| 6*Chr1_65a_IS407A_A                   | N   | NCTC_10229  | 6  | 626265-627500 | Chr1 | IS407A | GCGAC TGACCTGCCCCCTACA ATGAAGAAGCGCTTTACGCGCCCGCAAGCCAAACGCG; TGTTGGCCAGGGACTTTGCTAGAA( GGGGGCA    | GAAT | GGGG | N    |
| 7*Chr1_37_IS407A_A                    | N   | NCTC_10247  | 7  | 62646-63881   | Chr1 | IS407A | CGCGA TGACCTGCCCCCTACA ATGAAGAAGCGCTTTACGCGCCCGCAAGCCAAACGCG; TGTTGGCCAGGGACTTTGCTAGAA( GGTGCC1    | CGCG | GGTC | N    |
| 9*Chr1_37_IS407A_A                    | N   | SAVP1       | 9  | 627670-628905 | Chr1 | IS407A | TGGGC TGACCTGCCCCCTACA ATGAAGAAGCGCTTTACGCGCCCGCAAGCCAAACGCG; TGTTGGCCAGGGACTTTGCTAGAA( GACCCGG1   | GACC | CAAC | Y    |
| 3*Chr1_51_IS407A_B                    | N   | JHU         | 3  | 628699-629934 | Chr1 | IS407A | AGGCG TGACCTGCCCCCTACA ATGAAGAAGCGCTTTACGCGCCCGCAAGCCAAACGCG; TGTTGGCCAGGGACTTTGCTAGAA( GATGCG1    | GATG | GATG | Y    |
| 5*Chr1_114_IS407A_A                   | N   | ATCC_10399  | 5  | 635855-637090 | Chr1 | IS407A | TGATT( TGACCTGCCCCCTACA ATGAAGAAGCGCTTTACGCGCCCGCAAGCCAAACGCG; TGTTGGCCAGGGACTTTGCTAGAA( GATCCGG1  | GAAG | GATC | N    |
| 7*Chr1_112_IS407A;7*Chr1_97_IS407A_A  | D   | NCTC_10247  | 7  | 643362-644597 | Chr1 | IS407A | GGCAC TGACCTGCCCCCTACA ATGAAGAAGCGCTTTACGCGCCCGCAAGCCAAACGCG; TGTTGGCCAGGGACTTTGCTAGAA( ACCGCC1    | CCCC | ACCG | N    |
| 5*Chr1_113_IS407A_A                   | N   | ATCC_10399  | 5  | 649478-650713 | Chr1 | IS407A | TTTGCT TGACCTGCCCCCTACA ATGAAGAAGCGCTTTACGCGCCCGCAAGCCAAACGCG; TGTTGGCCAGGGACTTTGCTAGAA( ATCTACCT  | CCTC | ATCT | N    |
| 10*Chr1_112_IS40;10*Chr1_49_IS407A_A  | D-R | PRL20       | 10 | 652265-653500 | Chr1 | IS407A | TCATC( TGACCTGCCCCCTACA ATGAAGAAGCGCTTTACGCGCCCGCAAGCCAAACGCG; TGTTGGCCAGGGACTTTGCTAGAA( GGGGTGA   | TCAA | GGGC | N    |
| 8*Chr1_65a_IS407A_A                   | N   | 2002721280  | 8  | 659479-660714 | Chr1 | IS407A | GCGAC TGACCTGCCCCCTACA ATGAAGAAGCGCTTTACGCGCCCGCAAGCCAAACGCG; TGTTGGCCAGGGACTTTGCTAGAA( GGGGGCA    | GAAT | GGGG | N    |
| 2*Chr1_54_IS407A;2*Chr1_65b_IS407A_A  | D-R | fmh         | 2  | 665167-666402 | Chr1 | IS407A | GCGAC TGACCTGCCCCCTACA ATGAAGAAGCGCTTTACGCGCCCGCAAGCCAAACGCG; TGTTGGCCAGGGACTTTGCTAGAA( GCGGGTC    | GAAT | CGGG | N    |
| 3*Chr1_54_IS407A;3*Chr1_65b_IS407A_A  | D-R | JHU         | 3  | 669375-670610 | Chr1 | IS407A | GCGAC TGACCTGCCCCCTACA ATGAAGAAGCGCTTTACGCGCCCGCAAGCCAAACGCG; TGTTGGCCAGGGACTTTGCTAGAA( GCGGGTC    | GAAT | CGGG | N    |
| 4*Chr1_112_IS407A;4*Chr1_49_IS407A_A  | D-R | gb8_horse_4 | 4  | 678191-679426 | Chr1 | IS407A | TCATC( TGACCTGCCCCCTACA ATGAAGAAGCGCTTTACGCGCCCGCAAGCCAAACGCG; TGTTGGCCAGGGACTTTGCTAGAA( GGGGTGA   | TCAA | GGGC | N    |
| 1*Chr1_112_IS407A;1*Chr1_49_IS407A_A  | D-R | ATCC_23344  | 1  | 683232-684467 | Chr1 | IS407A | TCATC( TGACCTGCCCCCTACA ATGAAGAAGCGCTTTACGCGCCCGCAAGCCAAACGCG; TGTTGGCCAGGGACTTTGCTAGAA( GGGGTGA   | TCAA | GGGC | N    |
| 7*Chr1_95_IS407A_A                    | N   | NCTC_10247  | 7  | 686514-687749 | Chr1 | IS407A | GGCG TGACCTGCCCCCTACA ATGAAGAAGCGCTTTACGCGCCCGCAAGCCAAACGCG; TGTTGGCCAGGGACTTTGCTAGAA( GCCCGC1     | GATG | GCCC | N    |
| 6*Chr1_64a_IS407A_A                   | N   | NCTC_10229  | 6  | 688082-689317 | Chr1 | IS407A | CTTGT( TGACCTGCCCCCTACA ATGAAGAAGCGCTTTACGCGCCCGCAAGCCAAACGCG; TGTTGGCCAGGGACTTTGCTAGAA( TCGTCTC   | TCGC | TCGC | Y    |
| 9*Chr1_43b_IS407A;9*Chr1_57_IS407A_A  | D-R | SAVP1       | 9  | 699385-700620 | Chr1 | IS407A | CCCGT( TGACCTGCCCCCTACA ATGAAGAAGCGCTTTACGCGCCCGCAAGCCAAACGCG; TGTTGGCCAGGGACTTTGCTAGAA( CGTGAGC1  | CCCG | CGTG | N    |
| 8*Chr1_98_IS407A;8*Chr1_66_IS407A_A   | D-R | 2002721280  | 8  | 710666-711901 | Chr1 | IS407A | CTCGT( TGACCTGCCCCCTACA ATGAAGAAGCGCTTTACGCGCCCGCAAGCCAAACGCG; TGTTGGCCAGGGACTTTGCTAGAA( GTAGGCA1  | CCCC | GTAG | N    |
| 2*Chr1_98_IS407A;2*Chr1_66_IS407A_A   | D-R | fmh         | 2  | 717113-718348 | Chr1 | IS407A | CTCGT( TGACCTGCCCCCTACA ATGAAGAAGCGCTTTACGCGCCCGCAAGCCAAACGCG; TGTTGGCCAGGGACTTTGCTAGAA( GTAGGCA1  | CCCC | GTAG | N    |
| 5*Chr1_112_IS407A;5*Chr1_49_IS407A_A  | D-R | ATCC_10399  | 5  | 719456-720691 | Chr1 | IS407A | TCATC( TGACCTGCCCCCTACA ATGAAGAAGCGCTTTACGCGCCCGCAAGCCAAACGCG; TGTTGGCCAGGGACTTTGCTAGAA( GGGGTGA   | TCAA | GGGC | N    |
| 3*Chr1_98_IS407A;3*Chr1_66_IS407A_A   | D-R | JHU         | 3  | 722507-723742 | Chr1 | IS407A | CTCGT( TGACCTGCCCCCTACA ATGAAGAAGCGCTTTACGCGCCCGCAAGCCAAACGCG; TGTTGGCCAGGGACTTTGCTAGAA( GTAGGCA1  | CCCG | GTAG | N    |
| 9*Chr1_132a_IS40;9*Chr1_58a_IS407A_A  | R   | SAVP1       | 9  | 726736-727971 | Chr1 | IS407A | ACGCC TGACCTGCCCCCTACA ATGAAGAAGCGCTTTACGCGCCCGCAAGCCAAACGCG; TGTTGGCCAGGGACTTTGCTAGAA( CGTTCGT    | GGAC | CGTT | N    |
| 10*Chr1_65a_IS407A_A                  | N   | PRL20       | 10 | 740650-741885 | Chr1 | IS407A | GCGAC TGACCTGCCCCCTACA ATGAAGAAGCGCTTTACGCGCCCGCAAGCCAAACGCG; TGTTGGCCAGGGACTTTGCTAGAA( GGGGGCA    | GAAT | GGGG | N    |
| 4*Chr1_51_IS407A_B                    | N   | gb8_horse_4 | 4  | 743068-744303 | Chr1 | IS407A | AGGCG TGACCTGCCCCCTACA ATGAAGAAGCGCTTTACGCGCCCGCAAGCCAAACGCG; TGTTGGCCAGGGACTTTGCTAGAA( GATGCG1    | GATG | GATG | Y    |
| 7*Chr1_84a_IS407A;7*Chr1_94b_IS407A_A | R   | NCTC_10247  | 7  | 745418-746653 | Chr1 | IS407A | GTGCC( TGACCTGCCCCCTACA ATGAAGAAGCGCTTTACGCGCCCGCAAGCCAAACGCG; TGTTGGCCAGGGACTTTGCTAGAA( GTAAAGC   | AAAG | GTAA | N    |
| 1*Chr1_51_IS407A_B                    | N   | ATCC_23344  | 1  | 748097-749332 | Chr1 | IS407A | AGGCG TGACCTGCCCCCTACA ATGAAGAAGCGCTTTACGCGCCCGCAAGCCAAACGCG; TGTTGGCCAGGGACTTTGCTAGAA( GATGCG1    | GATG | GATG | Y    |
| 7*Chr1_83_IS407A_A                    | N   | NCTC_10247  | 7  | 760536-761771 | Chr1 | IS407A | TTACG( TGACCTGCCCCCTACA ATGAAGAAGCGCTTTACGCGCCCGCAAGCCAAACGCG; TGTTGGCCAGGGACTTTGCTAGAA( ATCCACC   | TGAT | GATC | N    |
| 8*Chr1_96_IS407A;8*Chr1_97_IS407A_A   | D   | 2002721280  | 8  | 769257-770492 | Chr1 | IS407A | GGCAC TGACCTGCCCCCTACA ATGAAGAAGCGCTTTACGCGCCCGCAAGCCAAACGCG; TGTTGGCCAGGGACTTTGCTAGAA( ACCGCC1    | CCCC | ACCG | N    |
| 2*Chr1_96_IS407A;2*Chr1_97_IS407A_A   | D   | fmh         | 2  | 776030-777265 | Chr1 | IS407A | GGCAC TGACCTGCCCCCTACA ATGAAGAAGCGCTTTACGCGCCCGCAAGCCAAACGCG; TGTTGGCCAGGGACTTTGCTAGAA( ACCGCC1    | CCCC | ACCG | N    |
| 3*Chr1_96_IS407A;3*Chr1_97_IS407A_A   | D   | JHU         | 3  | 782172-783407 | Chr1 | IS407A | GGCAC TGACCTGCCCCCTACA ATGAAGAAGCGCTTTACGCGCCCGCAAGCCAAACGCG; TGTTGGCCAGGGACTTTGCTAGAA( ACCGCC1    | CCCC | ACCG | N    |
| 7*Chr1_79_IS407A;7*Chr1_80_IS407A_A   | D   | NCTC_10247  | 7  | 782570-783805 | Chr1 | IS407A | GGGAC TGACCTGCCCCCTACA ATGAAGAAGCGCTTTACGCGCCCGCAAGCCAAACGCG; TGTTGGCCAGGGACTTTGCTAGAA( CAAGCAG1   | GTCA | CAAG | N    |
| 4*Chr1_54_IS407A;4*Chr1_65b_IS407A_A  | D-R | gb8_horse_4 | 4  | 783009-784244 | Chr1 | IS407A | GCGAC TGACCTGCCCCCTACA ATGAAGAAGCGCTTTACGCGCCCGCAAGCCAAACGCG; TGTTGGCCAGGGACTTTGCTAGAA( GCGGGTC    | GAAT | CGGG | N    |
| 1*Chr1_54_IS407A;1*Chr1_65b_IS407A_A  | D-R | ATCC_23344  | 1  | 788024-789259 | Chr1 | IS407A | GCGAC TGACCTGCCCCCTACA ATGAAGAAGCGCTTTACGCGCCCGCAAGCCAAACGCG; TGTTGGCCAGGGACTTTGCTAGAA( GCGGGTC    | GAAT | CGGG | N    |
| 10*Chr1_98_IS407A;10*Chr1_66_IS407A_A | D-R | PRL20       | 10 | 791849-793084 | Chr1 | IS407A | CTCGT( TGACCTGCCCCCTACA ATGAAGAAGCGCTTTACGCGCCCGCAAGCCAAACGCG; TGTTGGCCAGGGACTTTGCTAGAA( GTAGGCA1  | CCCC | GTAG | N    |



|                       |   |             |    |                 |      |        |                                                |                    |          |         |      |
|-----------------------|---|-------------|----|-----------------|------|--------|------------------------------------------------|--------------------|----------|---------|------|
| 3*Chr1_82_ISBma1_A    | N | JHU         | 3  | 1184351-1185389 | Chr1 | ISBma1 | CGAAA GGTTCATCGCAGAAAA TTGCTCGATCGCAAGGCAC#    | #IS407A            | TTTCTTTT | #IS407A | N    |
| 3*Chr1_82-1_ISBma1_A  | N | JHU         | 3  | 1186415-1186893 | Chr1 | ISBma1 | #IS407/ ~~~~~ ACC                              | TTTCTTTTC#IS407A   | TTTCTTTT | #IS407A | N.D. |
| 10*Chr1_82_ISBma1_A   | N | PRL20       | 10 | 1191155-1192031 | Chr1 | ISBma1 | CGAAA GGTTCATCGCAGAAAA TTGCTCGATCGCAAGGCAC#    | #IS407A            | TTTCTTTT | #IS407A | N    |
| 10*Chr1_82-1_ISBma1_A | N | PRL20       | 10 | 1193171-1193697 | Chr1 | ISBma1 | #IS407/ ~~~~~ ACC                              | TTTCTTTTC#IS407A   | TTTCTTTT | #IS407A | N.D. |
| 7*Chr1_103_ISBma1_A   | N | NCTC_10247  | 7  | 1266623-1267927 | Chr1 | ISBma1 | AGTCG.GGTTTCATCGCAGAAAA TTGCTCGATCGCAAGGCACACC | CTTTTTTTC#CTTTTTT  | CTTTTTTT | #IS407A | Y    |
| 4*Chr1_82_ISBma1_A    | N | gb8_horse_4 | 4  | 1281913-1282951 | Chr1 | ISBma1 | CGAAA GGTTCATCGCAGAAAA TTGCTCGATCGCAAGGCAC#    | #IS407A            | TTTCTTTT | #IS407A | N    |
| 4*Chr1_82-1_ISBma1_A  | N | gb8_horse_4 | 4  | 1283977-1284455 | Chr1 | ISBma1 | #IS407/ ~~~~~ ACC                              | TTTCTTTTC#IS407A   | TTTCTTTT | #IS407A | N.D. |
| 5*Chr1_82-1_ISBma1_A  | N | ATCC_10399  | 5  | 1284930-1285408 | Chr1 | ISBma1 | #IS407/ ~~~~~ ACC                              | TTTCTTTTC#IS407A   | TTTCTTTT | #IS407A | N.D. |
| 5*Chr1_82_ISBma1_A    | N | ATCC_10399  | 5  | 1286434-1287472 | Chr1 | ISBma1 | CGAAA GGTTCATCGCAGAAAA TTGCTCGATCGCAAGGCAC#    | #IS407A            | TTTCTTTT | #IS407A | N    |
| 1*Chr1_82_ISBma1_A    | N | ATCC_23344  | 1  | 1290138-1291176 | Chr1 | ISBma1 | CGAAA GGTTCATCGCAGAAAA TTGCTCGATCGCAAGGCAC#    | #IS407A            | TTTCTTTT | #IS407A | N    |
| 1*Chr1_82-1_ISBma1_A  | N | ATCC_23344  | 1  | 1292202-1292680 | Chr1 | ISBma1 | #IS407/ ~~~~~ ACC                              | TTTCTTTTC#IS407A   | TTTCTTTT | #IS407A | N.D. |
| 4*Chr1_12_ISBma1_A    | N | gb8_horse_4 | 4  | 141771-143075   | Chr1 | ISBma1 | GAATT(GGTTTCATCGCAGAAAA TTGCTCGATCGCAAGGCACACC | TTTTTCTTT TTTTTCTT | TTTTTCTT | #IS407A | Y    |
| 10*Chr1_12_ISBma1_A   | N | PRL20       | 10 | 1423-2727       | Chr1 | ISBma1 | GAATT(GGTTTCATCGCAGAAAA TTGCTCGATCGCAAGGCACACC | TTTTTCTTT TTTTTCTT | TTTTTCTT | #IS407A | Y    |
| 1*Chr1_12_ISBma1_A    | N | ATCC_23344  | 1  | 142668-143972   | Chr1 | ISBma1 | GAATT(GGTTTCATCGCAGAAAA TTGCTCGATCGCAAGGCACACC | TTTTTCTTT TTTTTCTT | TTTTTCTT | #IS407A | Y    |
| 2*Chr1_103_ISBma1_A   | N | fmh         | 2  | 1458477-1459781 | Chr1 | ISBma1 | AGTCG.GGTTTCATCGCAGAAAA TTGCTCGATCGCAAGGCACACC | CTTTTTTTC#CTTTTTT  | CTTTTTTT | #IS407A | Y    |
| 6*Chr1_26_ISBma1_A    | N | NCTC_10229  | 6  | 1463413-1464719 | Chr1 | ISBma1 | GCGTG GGTTCATCGCAGAAAA TTGCTCGATCGCAAGGCACACC  | ATAAAAA/ATAAAAA    | ATAAAAA/ | #IS407A | Y    |
| 3*Chr1_103_ISBma1_A   | N | JHU         | 3  | 1467796-1469100 | Chr1 | ISBma1 | AGTCG.GGTTTCATCGCAGAAAA TTGCTCGATCGCAAGGCACACC | CTTTTTTTC#CTTTTTT  | CTTTTTTT | #IS407A | Y    |
| 8*Chr1_103_ISBma1_A   | N | 2002721280  | 8  | 1472738-1474042 | Chr1 | ISBma1 | AGTCG.GGTTTCATCGCAGAAAA TTGCTCGATCGCAAGGCACACC | CTTTTTTTC#CTTTTTT  | CTTTTTTT | #IS407A | Y    |
| 7*Chr1_125_ISBma1_A   | N | NCTC_10247  | 7  | 147293-148597   | Chr1 | ISBma1 | AGGCA GGTTCATCGCAGAAAA TTGCTCGATCGCAAGGCACACC  | AATTTTTT(AATTTTTT  | AATTTTTT | #IS407A | Y    |
| 9*Chr1_88_ISBma1_B    | N | SAVP1       | 9  | 1497063-1497359 | Chr1 | ISBma1 | #IS407/ ~~~~~ ACC                              | ATTTTTTTC#IS407A   | ATTTTTTT | #IS407A | N.D. |
| 5*Chr1_88_ISBma1_B    | N | ATCC_10399  | 5  | 1497242-1497500 | Chr1 | ISBma1 | #IS407/ ~~~~~ ACC                              | ATTTTTTTC#IS407A   | ATTTTTTT | #IS407A | N.D. |
| 10*Chr1_103_ISBma1_A  | N | PRL20       | 10 | 1515896-1517200 | Chr1 | ISBma1 | AGTCG.GGTTTCATCGCAGAAAA TTGCTCGATCGCAAGGCACACC | CTTTTTTTC#CTTTTTT  | CTTTTTTT | #IS407A | Y    |
| 3*Chr1_12_ISBma1_A    | N | JHU         | 3  | 15493-16797     | Chr1 | ISBma1 | GAATT(GGTTTCATCGCAGAAAA TTGCTCGATCGCAAGGCACACC | TTTTTCTTT TTTTTCTT | TTTTTCTT | #IS407A | Y    |
| 5*Chr1_73_ISBma1_A    | N | ATCC_10399  | 5  | 1553580-1554884 | Chr1 | ISBma1 | GAGAG GGTTCATCGCAGAAAA TTGCTCGATCGCAAGGCACACC  | AAAAAAA/AAAAAAT    | AAAAAAA/ | #IS407A | Y    |
| 4*Chr1_103_ISBma1_A   | N | gb8_horse_4 | 4  | 1561382-1562686 | Chr1 | ISBma1 | AGTCG.GGTTTCATCGCAGAAAA TTGCTCGATCGCAAGGCACACC | CTTTTTTTC#CTTTTTT  | CTTTTTTT | #IS407A | Y    |
| 1*Chr1_103_ISBma1_A   | N | ATCC_23344  | 1  | 1570802-1572106 | Chr1 | ISBma1 | AGTCG.GGTTTCATCGCAGAAAA TTGCTCGATCGCAAGGCACACC | CTTTTTTTC#CTTTTTT  | CTTTTTTT | #IS407A | Y    |
| 2*Chr1_12_ISBma1_A    | N | fmh         | 2  | 15916-17220     | Chr1 | ISBma1 | GAATT(GGTTTCATCGCAGAAAA TTGCTCGATCGCAAGGCACACC | TTTTTCTTT TTTTTCTT | TTTTTCTT | #IS407A | Y    |
| 9*Chr1_26_ISBma1_A    | N | SAVP1       | 9  | 160477-161783   | Chr1 | ISBma1 | GCGTG GGTTCATCGCAGAAAA TTGCTCGATCGCAAGGCACACC  | ATAAAAA/ATAAAAA    | ATAAAAA/ | #IS407A | Y    |
| 8*Chr1_12_ISBma1_A    | N | 2002721280  | 8  | 16877-18181     | Chr1 | ISBma1 | GAATT(GGTTTCATCGCAGAAAA TTGCTCGATCGCAAGGCACACC | TTTTTCTTT TTTTTCTT | TTTTTCTT | #IS407A | Y    |
| 9*Chr1_82_ISBma1_A    | N | SAVP1       | 9  | 1706788-1707664 | Chr1 | ISBma1 | CGAAA GGTTCATCGCAGAAAA TTGCTCGATCGCAAGGCAC#    | #IS407A            | TTTCTTTT | #IS407A | N.D. |
| 9*Chr1_82-1_ISBma1_A  | N | SAVP1       | 9  | 1708804-1709330 | Chr1 | ISBma1 | #IS407/ ~~~~~ ACC                              | TTTCTTTTC#IS407A   | TTTCTTTT | #IS407A | N.D. |
| 5*Chr1_12_ISBma1_A    | N | ATCC_10399  | 5  | 17216-18520     | Chr1 | ISBma1 | GAATT(GGTTTCATCGCAGAAAA TTGCTCGATCGCAAGGCACACC | TTTTTCTTT TTTTTCTT | TTTTTCTT | #IS407A | Y    |
| 5*Chr1_103_ISBma1_A   | N | ATCC_10399  | 5  | 1724494-1725798 | Chr1 | ISBma1 | AGTCG.GGTTTCATCGCAGAAAA TTGCTCGATCGCAAGGCACACC | CTTTTTTTC#CTTTTTT  | CTTTTTTT | #IS407A | Y    |
| 2*Chr1_60_ISBma1_A    | N | fmh         | 2  | 1842154-1843458 | Chr1 | ISBma1 | CGGTA/ GGTTCATCGCAGAAAA TTGCTCGATCGCAAGGCACACC | AAAAAAT/AAAAAATA   | AAAAAAT/ | #IS407A | Y    |
| 3*Chr1_60_ISBma1_A    | N | JHU         | 3  | 1856886-1858190 | Chr1 | ISBma1 | CGGTA/ GGTTCATCGCAGAAAA TTGCTCGATCGCAAGGCACACC | AAAAAAT/AAAAAATA   | AAAAAAT/ | #IS407A | Y    |
| 10*Chr1_60_ISBma1_A   | N | PRL20       | 10 | 1895357-1896661 | Chr1 | ISBma1 | CGGTA/ GGTTCATCGCAGAAAA TTGCTCGATCGCAAGGCACACC | AAAAAAT/AAAAAATA   | AAAAAAT/ | #IS407A | Y    |
| 2*Chr1_59_ISBma1_A    | N | fmh         | 2  | 1925292-1925696 | Chr1 | ISBma1 | CACCG GGTTCATCGCAGAAAA TTGCTCGATCGCAAGGCACACC  | AAAAAAA/AAAAAAT    | AAAAAAA/ | #IS407A | Y    |
| 7*Chr1_103_ISBma1_A   | N | NCTC_10247  | 7  | 1928819-1930125 | Chr1 | ISBma1 | GCCGC GGTTCATCGCAGAAAA TTGCTCGATCGCAAGGCACACC  | AAAAAAA/AAAAAATA   | AAAAAAA/ | #IS407A | Y    |
| 7*Chr1_129_ISBma1_A   | N | NCTC_10247  | 7  | 1931826-1933130 | Chr1 | ISBma1 | GCCGC GGTTCATCGCAGAAAA TTGCTCGATCGCAAGGCACACC  | TTTTTTTATTTTTTTA   | TTTTTTTA | #IS407A | Y    |
| 4*Chr1_60_ISBma1_A    | N | gb8_horse_4 | 4  | 1939412-1940716 | Chr1 | ISBma1 | CGGTA/ GGTTCATCGCAGAAAA TTGCTCGATCGCAAGGCACACC | AAAAAAT/AAAAAATA   | AAAAAAT/ | #IS407A | Y    |
| 3*Chr1_59_ISBma1_A    | N | JHU         | 3  | 1940744-1942048 | Chr1 | ISBma1 | CACCG GGTTCATCGCAGAAAA TTGCTCGATCGCAAGGCACACC  | AAAAAAA/AAAAAAT    | AAAAAAA/ | #IS407A | Y    |
| 1*Chr1_60_ISBma1_A    | N | ATCC_23344  | 1  | 1951374-1952678 | Chr1 | ISBma1 | CGGTA/ GGTTCATCGCAGAAAA TTGCTCGATCGCAAGGCACACC | AAAAAAT/AAAAAATA   | AAAAAAT/ | #IS407A | Y    |
| 6*Chr1_153_ISBma1_A   | N | NCTC_10229  | 6  | 1952299-1953603 | Chr1 | ISBma1 | CCGAT/ GGTTCATCGCAGAAAA TTGCTCGATCGCAAGGCACACC | TTTTTTTATTTTTTTA   | TTTTTTTA | #IS407A | Y    |
| 10*Chr1_59_ISBma1_A   | N | PRL20       | 10 | 1975920-1977224 | Chr1 | ISBma1 | CACCG GGTTCATCGCAGAAAA TTGCTCGATCGCAAGGCACACC  | AAAAAAA/AAAAAAT    | AAAAAAA/ | #IS407A | Y    |
| 6*Chr1_156_ISBma1_A   | N | NCTC_10229  | 6  | 1985332-1986531 | Chr1 | ISBma1 | CCGCG GGTTCATCGCAGAAAA TTGCTCGATCGCAAGGCAC#    | #IS407A            | AAAAAATA | #IS407A | N.D. |
| 9*Chr1_103_ISBma1_A   | N | SAVP1       | 9  | 1987012-1988316 | Chr1 | ISBma1 | AGTCG.GGTTTCATCGCAGAAAA TTGCTCGATCGCAAGGCACACC | CTTTTTTTC#CTTTTTT  | CTTTTTTT | #IS407A | Y    |
| 4*Chr1_59_ISBma1_A    | N | gb8_horse_4 | 4  | 2020579-2021883 | Chr1 | ISBma1 | CACCG GGTTCATCGCAGAAAA TTGCTCGATCGCAAGGCACACC  | AAAAAAA/AAAAAAT    | AAAAAAA/ | #IS407A | Y    |
| 1*Chr1_59_ISBma1_A    | N | ATCC_23344  | 1  | 2032534-2033838 | Chr1 | ISBma1 | CACCG GGTTCATCGCAGAAAA TTGCTCGATCGCAAGGCACACC  | AAAAAAA/AAAAAAT    | AAAAAAA/ | #IS407A | Y    |
| 2*Chr1_127_ISBma1_A   | N | fmh         | 2  | 2073439-2073769 | Chr1 | ISBma1 | #IS407/ ~~~~~ ACC                              | AAAAAAA/#IS407A    | AAAAAAA/ | #IS407A | N.D. |
| 2*Chr1_129_ISBma1_A   | N | fmh         | 2  | 2075470-2076774 | Chr1 | ISBma1 | GCCGC GGTTCATCGCAGAAAA TTGCTCGATCGCAAGGCACACC  | TTTTTTTATTTTTTTA   | TTTTTTTA | #IS407A | Y    |
| 3*Chr1_127_ISBma1_A   | N | JHU         | 3  | 2088899-2089229 | Chr1 | ISBma1 | #IS407/ ~~~~~ ACC                              | AAAAAAA/#IS407A    | AAAAAAA/ | #IS407A | N.D. |
| 3*Chr1_129_ISBma1_A   | N | JHU         | 3  | 2090930-2092234 | Chr1 | ISBma1 | GCCGC GGTTCATCGCAGAAAA TTGCTCGATCGCAAGGCACACC  | TTTTTTTATTTTTTTA   | TTTTTTTA | #IS407A | Y    |
| 5*Chr1_60_ISBma1_A    | N | ATCC_10399  | 5  | 2100644-2101948 | Chr1 | ISBma1 | CGGTA/ GGTTCATCGCAGAAAA TTGCTCGATCGCAAGGCACACC | AAAAAAT/AAAAAATA   | AAAAAAT/ | #IS407A | Y    |
| 2*Chr1_36_ISBma1_A    | N | fmh         | 2  | 212072-213376   | Chr1 | ISBma1 | GCCGC GGTTCATCGCAGAAAA TTGCTCGATCGCAAGGCACACC  | TTTTTCTTT TTTTTCTT | TTTTTCTT | #IS407A | Y    |
| 8*Chr1_36_ISBma1_A    | N | 2002721280  | 8  | 212567-213871   | Chr1 | ISBma1 | GCCGC GGTTCATCGCAGAAAA TTGCTCGATCGCAAGGCACACC  | TTTTTCTTT TTTTTCTT | TTTTTCTT | #IS407A | Y    |
| 3*Chr1_36_ISBma1_A    | N | JHU         | 3  | 212916-214220   | Chr1 | ISBma1 | GCCGC GGTTCATCGCAGAAAA TTGCTCGATCGCAAGGCACACC  | TTTTTCTTT TTTTTCTT | TTTTTCTT | #IS407A | Y    |
| 8*Chr1_127_ISBma1_A   | N | 2002721280  | 8  | 2134387-2135693 | Chr1 | ISBma1 | GCCGC GGTTCATCGCAGAAAA TTGCTCGATCGCAAGGCACACC  | AAAAAAA/AAAAAAT    | AAAAAAA/ | #IS407A | Y    |
| 8*Chr1_129_ISBma1_A   | N | 2002721280  | 8  | 2137833-2138804 | Chr1 | ISBma1 | ~~~~~ ACC                                      | TTTTTTTAT~~~~~     | TTTTTTTA | #IS407A | N.D. |

|                                     |   |             |    |                 |      |        |                                                |                    |          |      |
|-------------------------------------|---|-------------|----|-----------------|------|--------|------------------------------------------------|--------------------|----------|------|
| 10*Chr1_127_ISBma1_A                | N | PRL20       | 10 | 2150683-2151080 | Chr1 | ISBma1 | #IS407/~~~~~ ACC                               | AAAAAA/#IS407A     | AAAAAA/  | N.D. |
| 10*Chr1_129_ISBma1_A                | N | PRL20       | 10 | 2155991-2157225 | Chr1 | ISBma1 | #IS407/~~~~~CATCGAATCGTTCAACGGCACC             | TTTTTTTAT#IS407A   | TTTTTTTA | N.D. |
| 4*Chr1_127_ISBma1_A                 | N | gb8_horse_4 | 4  | 2168750-2169080 | Chr1 | ISBma1 | #IS407/~~~~~ ACC                               | AAAAAAA/#IS407A    | AAAAAAA/ | N.D. |
| 4*Chr1_129_ISBma1_A                 | N | gb8_horse_4 | 4  | 2170781-2172085 | Chr1 | ISBma1 | CGCGC GGTTCATCGCAGAAAA TTGCTCGATCGCAAGGCACACC  | TTTTTTTATTTTTTTA   | TTTTTTTA | Y    |
| 1*Chr1_127_ISBma1_A                 | N | ATCC_23344  | 1  | 2180681-2181011 | Chr1 | ISBma1 | #IS407/~~~~~ ACC                               | AAAAAAA/#IS407A    | AAAAAAA/ | N.D. |
| 5*Chr1_129_ISBma1_A                 | N | ATCC_10399  | 5  | 2181906-2183210 | Chr1 | ISBma1 | CACCG GGTTCATCGCAGAAAA TTGCTCGATCGCAAGGCACACC  | AAAAAAA'AAAAAAAT   | AAAAAAA' | Y    |
| 1*Chr1_129_ISBma1_A                 | N | ATCC_23344  | 1  | 2182712-2184016 | Chr1 | ISBma1 | CGCGC GGTTCATCGCAGAAAA TTGCTCGATCGCAAGGCACACC  | TTTTTTTATTTTTTTA   | TTTTTTTA | Y    |
| 6*Chr1_14_ISBma1_A                  | N | NCTC_10229  | 6  | 2204564-2205868 | Chr1 | ISBma1 | AAACA GGTTCATCGCAGAAAA TTGCTCGATCGCAAGGCACACC  | TTTTTTTCC(TTTTTTCC | TTTTTTCC | Y    |
| 6*Chr1_12_ISBma1_A                  | N | NCTC_10229  | 6  | 2294405-2295709 | Chr1 | ISBma1 | GAATT(GGTTTCATCGCAGAAAA TTGCTCGATCGCAAGGCACACC | TTTTTCTTT TTTTTCTT | TTTTTCTT | Y    |
| 7*Chr1_12_ISBma1_A                  | N | NCTC_10247  | 7  | 2302599-2303903 | Chr1 | ISBma1 | GAATT(GGTTTCATCGCAGAAAA TTGCTCGATCGCAAGGCACACC | TTTTTCTTT TTTTTCTT | TTTTTCTT | Y    |
| 5*Chr1_127_ISBma5*Chr1_129_ISBma1_A | N | ATCC_10399  | 5  | 2331091-2332356 | Chr1 | ISBma1 | #IS407/CGTCACGCTGAAGTTG ATGCTTAAACGAGCACTGGACC | TTTTTTTAT#IS407A   | TTTTTTTA | N.D. |
| 10*Chr1_125_ISBma1_A                | N | PRL20       | 10 | 2362908-2364212 | Chr1 | ISBma1 | AGGCA GGTTCATCGCAGAAAA TTGCTCGATCGCAAGGCACACC  | AATTTTTT(AATTTTTT  | AATTTTTT | Y    |
| 2*Chr1_142_ISBma1_B                 | N | fhh         | 2  | 2431313-2432619 | Chr1 | ISBma1 | GCGGC GGTTCATCGCAGAAAA TTGCTCGATCGCAAGGCACACC  | AAAAAAA'AAAAAAAT   | AAAAAAA' | Y    |
| 3*Chr1_142_ISBma1_B                 | N | JHU         | 3  | 2447452-2448758 | Chr1 | ISBma1 | GCGGC GGTTCATCGCAGAAAA TTGCTCGATCGCAAGGCACACC  | AAAAAAA'AAAAAAAT   | AAAAAAA' | Y    |
| 6*Chr1_36_ISBma1_A                  | N | NCTC_10229  | 6  | 2489753-2491057 | Chr1 | ISBma1 | GCGGC GGTTCATCGCAGAAAA TTGCTCGATCGCAAGGCACACC  | TTTTTCTTT TTTTTTCT | TTTTTCTT | Y    |
| 8*Chr1_156_ISBma1_A                 | N | 2002721280  | 8  | 2511737-2512936 | Chr1 | ISBma1 | CCGCG GGTTCATCGCAGAAAA TTGCTCGATCGCAAGGCAC#    | #IS407A AAAAAAAA   | #IS407A  | N.D. |
| 4*Chr1_142_ISBma1_B                 | N | gb8_horse_4 | 4  | 2526053-2527359 | Chr1 | ISBma1 | GCGGC GGTTCATCGCAGAAAA TTGCTCGATCGCAAGGCACACC  | AAAAAAA'AAAAAAAT   | AAAAAAA' | Y    |
| 1*Chr1_142_ISBma1_B                 | N | ATCC_23344  | 1  | 2538026-2539332 | Chr1 | ISBma1 | GCGGC GGTTCATCGCAGAAAA TTGCTCGATCGCAAGGCACACC  | AAAAAAA'AAAAAAAT   | AAAAAAA' | Y    |
| 8*Chr1_153_ISBma1_A                 | N | 2002721280  | 8  | 2544560-2545864 | Chr1 | ISBma1 | CCGAT(GGTTTCATCGCAGAAAA TTGCTCGATCGCAAGGCACACC | TTTTTTTATTTTTTTA   | TTTTTTTA | Y    |
| 9*Chr1_124_ISBma1_B                 | N | SAVP1       | 9  | 2568741-2570045 | Chr1 | ISBma1 | TCAGC GGTTCATCGCAGAAAA TTGCTCGATCGCAAGGCACACC  | TTTTTCTTT TTTTTTCT | TTTTTCTT | Y    |
| 10*Chr1_142_ISBma1_B                | N | PRL20       | 10 | 2584163-2585469 | Chr1 | ISBma1 | GCGGC GGTTCATCGCAGAAAA TTGCTCGATCGCAAGGCACACC  | AAAAAAA'AAAAAAAT   | AAAAAAA' | Y    |
| 2*Chr1_156_ISBma1_A                 | N | fhh         | 2  | 2598014-2598869 | Chr1 | ISBma1 | CCGCG GGTTCATCGCAGAAAA TTGCTCGATCGCAAGGCAC#    | #IS407A AAAAAAAA   | #IS407A  | N.D. |
| 9*Chr1_125_ISBma1_A                 | N | SAVP1       | 9  | 2603704-2605008 | Chr1 | ISBma1 | AGGCA GGTTCATCGCAGAAAA TTGCTCGATCGCAAGGCACACC  | AATTTTTT(AATTTTTT  | AATTTTTT | Y    |
| 3*Chr1_153_ISBma3*Chr1_156_ISBma1_A | N | JHU         | 3  | 2614893-2615748 | Chr1 | ISBma1 | CCGCG GGTTCATCGCAGAAAA TTGCTCGATCGCAAGGCAC#    | #IS406A AAAAAAAA   | #IS406A  | N.D. |
| 2*Chr1_153_ISBma1_A                 | N | fhh         | 2  | 2631429-2632733 | Chr1 | ISBma1 | CCGAT(GGTTTCATCGCAGAAAA TTGCTCGATCGCAAGGCACACC | TTTTTTTATTTTTTTA   | TTTTTTTA | Y    |
| 5*Chr1_142_ISBma1_B                 | N | ATCC_10399  | 5  | 2688082-2689388 | Chr1 | ISBma1 | GCGGC GGTTCATCGCAGAAAA TTGCTCGATCGCAAGGCACACC  | AAAAAAA'AAAAAAAT   | AAAAAAA' | Y    |
| 6*Chr1_127_ISBma6*Chr1_129_ISBma1_A | N | NCTC_10229  | 6  | 2688853-2690159 | Chr1 | ISBma1 | GCCGC GGTTCATCGCAGAAAA TTGCTCGATCGCAAGGCACACC  | TTTTTTTATAAAAAAA   | TTTTTTTA | N    |
| 4*Chr1_156_ISBma1_A                 | N | gb8_horse_4 | 4  | 2692085-2692940 | Chr1 | ISBma1 | CCGCG GGTTCATCGCAGAAAA TTGCTCGATCGCAAGGCAC#    | #IS407A AAAAAAAA   | #IS407A  | N.D. |
| 1*Chr1_156_ISBma1_A                 | N | ATCC_23344  | 1  | 2704469-2705324 | Chr1 | ISBma1 | CCGCG GGTTCATCGCAGAAAA TTGCTCGATCGCAAGGCAC#    | #IS407A AAAAAAAA   | #IS407A  | N.D. |
| 4*Chr1_153_ISBma1_A                 | N | gb8_horse_4 | 4  | 2723665-2724969 | Chr1 | ISBma1 | CCGAT(GGTTTCATCGCAGAAAA TTGCTCGATCGCAAGGCACACC | TTTTTTTATTTTTTTA   | TTTTTTTA | Y    |
| 1*Chr1_153_ISBma1_A                 | N | ATCC_23344  | 1  | 2737048-2738352 | Chr1 | ISBma1 | CCGAT(GGTTTCATCGCAGAAAA TTGCTCGATCGCAAGGCACACC | TTTTTTTATTTTTTTA   | TTTTTTTA | Y    |
| 10*Chr1_156_ISBma1_A                | N | PRL20       | 10 | 2755093-2756292 | Chr1 | ISBma1 | CCGCG GGTTCATCGCAGAAAA TTGCTCGATCGCAAGGCAC#    | #IS407A AAAAAAAA   | #IS407A  | N.D. |
| 10*Chr1_153_ISBma1_A                | N | PRL20       | 10 | 2787753-2789057 | Chr1 | ISBma1 | CCGAT(GGTTTCATCGCAGAAAA TTGCTCGATCGCAAGGCACACC | TTTTTTTATTTTTTTA   | TTTTTTTA | Y    |
| 9*Chr1_12_ISBma1_A                  | N | SAVP1       | 9  | 2799403-2800707 | Chr1 | ISBma1 | GAATT(GGTTTCATCGCAGAAAA TTGCTCGATCGCAAGGCACACC | TTTTTCTTT TTTTTTCT | TTTTTCTT | Y    |
| 7*Chr1_26_ISBma1_A                  | N | NCTC_10247  | 7  | 2816595-2817901 | Chr1 | ISBma1 | GCGTG GGTTCATCGCAGAAAA TTGCTCGATCGCAAGGCACACC  | ATAAAAA/ATAAAAA    | ATAAAAA/ | Y    |
| 5*Chr1_156_ISBma1_A                 | N | ATCC_10399  | 5  | 2854277-2855132 | Chr1 | ISBma1 | CCGCG GGTTCATCGCAGAAAA TTGCTCGATCGCAAGGCAC#    | #IS407A AAAAAAAA   | #IS407A  | N.D. |
| 5*Chr1_153_ISBma1_A                 | N | ATCC_10399  | 5  | 2886389-2887693 | Chr1 | ISBma1 | CCGAT(GGTTTCATCGCAGAAAA TTGCTCGATCGCAAGGCACACC | TTTTTTTATTTTTTTA   | TTTTTTTA | Y    |
| 9*Chr1_14_ISBma1_A                  | N | SAVP1       | 9  | 2887865-2888004 | Chr1 | ISBma1 | #IS407/~~~~~ ACC                               | TTTTTTTCC#IS407A   | TTTTTTCC | N.D. |
| 9*Chr1_14-1_ISBma1_A                | N | SAVP1       | 9  | 2889266-2890409 | Chr1 | ISBma1 | AAACA GGTTCATCGCAGAAAA TTGCTCGATCGCAAGGCAC#    | #IS407A TTTTTTCC   | #IS407A  | N.D. |
| 7*Chr1_59_ISBma1_A                  | N | NCTC_10247  | 7  | 2895712-290876  | Chr1 | ISBma1 | CACCG GGTTCATCGCAGAAAA TTGCTCGATCGCAAGGCACACC  | AAAAAAA'AAAAAAAT   | AAAAAAA' | Y    |
| 8*Chr1_26_ISBma1_A                  | N | 2002721280  | 8  | 3035091-3036397 | Chr1 | ISBma1 | GCGTG GGTTCATCGCAGAAAA TTGCTCGATCGCAAGGCACACC  | ATAAAAA/ATAAAAA    | ATAAAAA/ | Y    |
| 9*Chr1_156_ISBma1_A                 | N | SAVP1       | 9  | 3108437-3109636 | Chr1 | ISBma1 | CCGCG GGTTCATCGCAGAAAA TTGCTCGATCGCAAGGCAC#    | #IS407A AAAAAAAA   | #IS407A  | N.D. |
| 9*Chr1_153_ISBma1_A                 | N | SAVP1       | 9  | 3141365-3142669 | Chr1 | ISBma1 | CCGAT(GGTTTCATCGCAGAAAA TTGCTCGATCGCAAGGCACACC | TTTTTTTATTTTTTTA   | TTTTTTTA | Y    |
| 2*Chr1_26_ISBma1_A                  | N | fhh         | 2  | 3186645-3187951 | Chr1 | ISBma1 | GCGTG GGTTCATCGCAGAAAA TTGCTCGATCGCAAGGCACACC  | ATAAAAA/ATAAAAA    | ATAAAAA/ | Y    |
| 3*Chr1_26_ISBma1_A                  | N | JHU         | 3  | 3203538-3204844 | Chr1 | ISBma1 | GCGTG GGTTCATCGCAGAAAA TTGCTCGATCGCAAGGCACACC  | ATAAAAA/ATAAAAA    | ATAAAAA/ | Y    |
| 8*Chr1_14_ISBma1_A                  | N | 2002721280  | 8  | 3221823-3223127 | Chr1 | ISBma1 | AAACA GGTTCATCGCAGAAAA TTGCTCGATCGCAAGGCACACC  | TTTTTTTCC(TTTTTTCC | TTTTTTCC | Y    |
| 2*Chr1_14_ISBma1_A                  | N | fhh         | 2  | 3250236-3251540 | Chr1 | ISBma1 | AAACA GGTTCATCGCAGAAAA TTGCTCGATCGCAAGGCACACC  | TTTTTTTCC(TTTTTTCC | TTTTTTCC | Y    |
| 3*Chr1_14_ISBma1_A                  | N | JHU         | 3  | 3268498-3269802 | Chr1 | ISBma1 | AAACA GGTTCATCGCAGAAAA TTGCTCGATCGCAAGGCACACC  | TTTTTTTCC(TTTTTTCC | TTTTTTCC | Y    |
| 4*Chr1_26_ISBma1_A                  | N | gb8_horse_4 | 4  | 3273197-3274503 | Chr1 | ISBma1 | GCGTG GGTTCATCGCAGAAAA TTGCTCGATCGCAAGGCACACC  | ATAAAAA/ATAAAAA    | ATAAAAA/ | Y    |
| 1*Chr1_26_ISBma1_A                  | N | ATCC_23344  | 1  | 3286945-3288251 | Chr1 | ISBma1 | GCGTG GGTTCATCGCAGAAAA TTGCTCGATCGCAAGGCACACC  | ATAAAAA/ATAAAAA    | ATAAAAA/ | Y    |
| 10*Chr1_26_ISBma1_A                 | N | PRL20       | 10 | 3322621-3323927 | Chr1 | ISBma1 | GCGTG GGTTCATCGCAGAAAA TTGCTCGATCGCAAGGCACACC  | ATAAAAA/ATAAAAA    | ATAAAAA/ | Y    |
| 4*Chr1_14_ISBma1_A                  | N | gb8_horse_4 | 4  | 3336103-3337407 | Chr1 | ISBma1 | AAACA GGTTCATCGCAGAAAA TTGCTCGATCGCAAGGCACACC  | TTTTTTTCC(TTTTTTCC | TTTTTTCC | Y    |
| 1*Chr1_14_ISBma1_A                  | N | ATCC_23344  | 1  | 3349816-3351120 | Chr1 | ISBma1 | AAACA GGTTCATCGCAGAAAA TTGCTCGATCGCAAGGCACACC  | TTTTTTTCC(TTTTTTCC | TTTTTTCC | Y    |
| 6*Chr1_103_ISBma1_A                 | N | NCTC_10229  | 6  | 3350430-3351734 | Chr1 | ISBma1 | AGTCG.GGTTTCATCGCAGAAAA TTGCTCGATCGCAAGGCACACC | CTTTTTTCTTTTTTTT   | CTTTTTTT | Y    |
| 4*Chr1_36_ISBma1_A                  | N | gb8_horse_4 | 4  | 335870-337174   | Chr1 | ISBma1 | GCGGC GGTTCATCGCAGAAAA TTGCTCGATCGCAAGGCACACC  | TTTTTCTTT TTTTTTCT | TTTTTCTT | Y    |
| 5*Chr1_26_ISBma1_A                  | N | ATCC_10399  | 5  | 3360914-3362220 | Chr1 | ISBma1 | GCGTG GGTTCATCGCAGAAAA TTGCTCGATCGCAAGGCACACC  | ATAAAAA/ATAAAAA    | ATAAAAA/ | Y    |
| 1*Chr1_36_ISBma1_A                  | N | ATCC_23344  | 1  | 337256-338560   | Chr1 | ISBma1 | GCGGC GGTTCATCGCAGAAAA TTGCTCGATCGCAAGGCACACC  | TTTTTCTTT TTTTTTCT | TTTTTCTT | Y    |
| 7*Chr1_14_ISBma1_A                  | N | NCTC_10247  | 7  | 3397369-3398673 | Chr1 | ISBma1 | AAACA GGTTCATCGCAGAAAA TTGCTCGATCGCAAGGCACACC  | TTTTTTTCC(TTTTTTCC | TTTTTTCC | Y    |

|                      |   |             |    |                 |      |        |                       |                       |                        |                  |          |          |      |
|----------------------|---|-------------|----|-----------------|------|--------|-----------------------|-----------------------|------------------------|------------------|----------|----------|------|
| 7*Chr1_153_ISBma1_A  | N | NCTC_10247  | 7  | 3421451-3422755 | Chr1 | ISBma1 | CCGATGGTTCATCGCAGAAAA | TTGCTCGATCGCAAGGCACCC | TTTTTTTATTTTTTTA       | TTTTTTTA         | Y        |          |      |
| 2*Chr1_124_ISBma1_B  | N | fhm         | 2  | 342363-343435   | Chr1 | ISBma1 | #IS407/               | ~~~~~ ACC             | TTTTCTTT#IS407A        | TTTTCTT          | N.D.     |          |      |
| 5*Chr1_14_ISBma1_A   | N | ATCC_10399  | 5  | 3424621-3425925 | Chr1 | ISBma1 | AAACA                 | GGTTCATCGCAGAAAA      | TTGCTCGATCGCAAGGCACCC  | TTTTTCC(TTTTTTCC | TTTTTCC  | Y        |      |
| 3*Chr1_124_ISBma1_B  | N | JHU         | 3  | 343967-345039   | Chr1 | ISBma1 | #IS407/               | ~~~~~ ACC             | TTTTCTTT#IS407A        | TTTTCTT          | N        |          |      |
| 7*Chr1_156_ISBma1_A  | N | NCTC_10247  | 7  | 3454484-3455683 | Chr1 | ISBma1 | CCGCG                 | GGTTCATCGCAGAAAA      | TTGCTCGATCGCAAGGCAC#   | #IS407A          | AAAAAAA  | #IS407A  | N.D. |
| 9*Chr1_142_ISBma1_B  | N | SAVP1       | 9  | 348750-350056   | Chr1 | ISBma1 | GCGGC                 | GGTTCATCGCAGAAAA      | TTGCTCGATCGCAAGGCACACC | AAAAAAA'AAAAAAT  | AAAAAAA' | Y        |      |
| 10*Chr1_36_ISBma1_A  | N | PRL20       | 10 | 350249-351553   | Chr1 | ISBma1 | GCGGC                 | GGTTCATCGCAGAAAA      | TTGCTCGATCGCAAGGCACACC | TTTTTCTTTTTTCT   | TTTTTCT  | Y        |      |
| 7*Chr1_60_ISBma1_A   | N | NCTC_10247  | 7  | 370819-372123   | Chr1 | ISBma1 | CGGTA                 | GGTTCATCGCAGAAAA      | TTGCTCGATCGCAAGGCACACC | AAAAAAT/AAAAAATA | AAAAAAT/ | Y        |      |
| 5*Chr1_36_ISBma1_A   | N | ATCC_10399  | 5  | 374206-375510   | Chr1 | ISBma1 | GCGGC                 | GGTTCATCGCAGAAAA      | TTGCTCGATCGCAAGGCACACC | TTTTTCTTTTTTCT   | TTTTTCT  | Y        |      |
| 8*Chr1_125_ISBma1_A  | N | 2002721280  | 8  | 377508-378812   | Chr1 | ISBma1 | AGGCA                 | GGTTCATCGCAGAAAA      | TTGCTCGATCGCAAGGCACACC | AATTTTT(AATTTTTT | AATTTTT  | Y        |      |
| 2*Chr1_125_ISBma1_A  | N | fhm         | 2  | 377515-378819   | Chr1 | ISBma1 | AGGCA                 | GGTTCATCGCAGAAAA      | TTGCTCGATCGCAAGGCACACC | AATTTTT(AATTTTTT | AATTTTT  | Y        |      |
| 3*Chr1_125_ISBma1_A  | N | JHU         | 3  | 378674-379978   | Chr1 | ISBma1 | AGGCA                 | GGTTCATCGCAGAAAA      | TTGCTCGATCGCAAGGCACACC | AATTTTT(AATTTTTT | AATTTTT  | Y        |      |
| 6*Chr1_82_ISBma1_A   | N | NCTC_10229  | 6  | 398477-399353   | Chr1 | ISBma1 | CGAAA                 | GGTTCATCGCAGAAAA      | TTGCTCGATCGCAAGGCAC#   | #IS407A          | TTTTTTT  | #IS407A  | N.D. |
| 6*Chr1_82-1_ISBma1_A | N | NCTC_10229  | 6  | 399914-401019   | Chr1 | ISBma1 | #IS407/               | ~~~~~ ACC             | TTTCTTTT#IS407A        | TTTCTTT          | N.D.     |          |      |
| 8*Chr1_59_ISBma1_A   | N | 2002721280  | 8  | 422225-423530   | Chr1 | ISBma1 | CACCG                 | GGTTCATCGCAGAAAA      | TTGCTCGATCGCAAGGCACACC | AAAAAAA'AAAAAAT  | AAAAAAA' | Y        |      |
| 10*Chr1_124_ISBma1_B | N | PRL20       | 10 | 455910-457214   | Chr1 | ISBma1 | TCAGC                 | GGTTCATCGCAGAAAA      | TTGCTCGATCGCAAGGCACACC | TTTTCTTTTTTTCTT  | TTTTCTT  | Y        |      |
| 4*Chr1_124_ISBma1_B  | N | gb8_horse_4 | 4  | 464802-465874   | Chr1 | ISBma1 | #IS407/               | ~~~~~ ACC             | TTTTCTTT#IS407A        | TTTTCTT          | N.D.     |          |      |
| 1*Chr1_124_ISBma1_B  | N | ATCC_23344  | 1  | 466488-467560   | Chr1 | ISBma1 | #IS407/               | ~~~~~ ACC             | TTTTCTTT#IS407A        | TTTTCTT          | N.D.     |          |      |
| 4*Chr1_125_ISBma1_A  | N | gb8_horse_4 | 4  | 499540-500844   | Chr1 | ISBma1 | AGGCA                 | GGTTCATCGCAGAAAA      | TTGCTCGATCGCAAGGCACACC | AATTTTT(AATTTTTT | AATTTTT  | Y        |      |
| 1*Chr1_125_ISBma1_A  | N | ATCC_23344  | 1  | 501195-502499   | Chr1 | ISBma1 | AGGCA                 | GGTTCATCGCAGAAAA      | TTGCTCGATCGCAAGGCACACC | AATTTTT(AATTTTTT | AATTTTT  | Y        |      |
| 8*Chr1_60_ISBma1_A   | N | 2002721280  | 8  | 502009-502817   | Chr1 | ISBma1 | CGGTA                 | GGTTCATCGCAGAAAA      | TTGCTCGATCGCAAGGCAC#   | #contig_br       | AAAAAATA | #contig_ | N.D. |
| 5*Chr1_124_ISBma1_B  | N | ATCC_10399  | 5  | 503499-504571   | Chr1 | ISBma1 | #IS407/               | ~~~~~ ACC             | TTTTCTTT#IS407A        | TTTTCTT          | N.D.     |          |      |
| 5*Chr1_125_ISBma1_A  | N | ATCC_10399  | 5  | 538228-539532   | Chr1 | ISBma1 | AGGCA                 | GGTTCATCGCAGAAAA      | TTGCTCGATCGCAAGGCACACC | AATTTTT(AATTTTTT | AATTTTT  | Y        |      |
| 7*Chr1_36_ISBma1_A   | N | NCTC_10247  | 7  | 60358-61662     | Chr1 | ISBma1 | GCGGC                 | GGTTCATCGCAGAAAA      | TTGCTCGATCGCAAGGCACACC | TTTTTCTTTTTTCT   | TTTTTCT  | Y        |      |
| 9*Chr1_36_ISBma1_A   | N | SAVP1       | 9  | 625260-626564   | Chr1 | ISBma1 | GCGGC                 | GGTTCATCGCAGAAAA      | TTGCTCGATCGCAAGGCACACC | TTTTTCTTTTTTCT   | TTTTTCT  | Y        |      |
| 7*Chr1_82-1_ISBma1_A | N | NCTC_10247  | 7  | 760075-761180   | Chr1 | ISBma1 | #IS407/               | ~~~~~ ACC             | TTTCTTTT#IS407A        | TTTCTTT          | N.D.     |          |      |
| 7*Chr1_82_ISBma1_A   | N | NCTC_10247  | 7  | 761741-762617   | Chr1 | ISBma1 | CGAAA                 | GGTTCATCGCAGAAAA      | TTGCTCGATCGCAAGGCAC#   | #IS407A          | TTTTTTT  | #IS407A  | N.D. |
| 6*Chr1_60_ISBma1_A   | N | NCTC_10229  | 6  | 788886-790190   | Chr1 | ISBma1 | CGGTA                 | GGTTCATCGCAGAAAA      | TTGCTCGATCGCAAGGCACACC | AAAAAAT/AAAAAATA | AAAAAAT/ | Y        |      |
| 9*Chr1_127_ISBma1    | N | SAVP1       | 9  | 825845-826242   | Chr1 | ISBma1 | #IS407/               | ~~~~~ ACC             | TTTTTTAT#IS407A        | TTTTTTA          | N.D.     |          |      |
| 6*Chr1_59_ISBma1_A   | N | NCTC_10229  | 6  | 870043-871347   | Chr1 | ISBma1 | CACCG                 | GGTTCATCGCAGAAAA      | TTGCTCGATCGCAAGGCACACC | AAAAAAA'AAAAAAT  | AAAAAAA' | Y        |      |
| 10*Chr1_14_ISBma1_A  | N | PRL20       | 10 | 89941-91245     | Chr1 | ISBma1 | AAACA                 | GGTTCATCGCAGAAAA      | TTGCTCGATCGCAAGGCACACC | TTTTTCC(TTTTTTCC | TTTTTCC  | Y        |      |
| 2*Chr1_73_ISBma1_A   | N | fhm         | 2  | 945561-946865   | Chr1 | ISBma1 | GAGAG                 | GGTTCATCGCAGAAAA      | TTGCTCGATCGCAAGGCACACC | AAAAAAA'AAAAAAT  | AAAAAAA' | Y        |      |
| 3*Chr1_73_ISBma1_A   | N | JHU         | 3  | 953135-954439   | Chr1 | ISBma1 | GAGAG                 | GGTTCATCGCAGAAAA      | TTGCTCGATCGCAAGGCACACC | AAAAAAA'AAAAAAT  | AAAAAAA' | Y        |      |
| 8*Chr1_82-1_ISBma1_A | N | 2002721280  | 8  | 966954-968059   | Chr1 | ISBma1 | #IS407/               | ~~~~~ ACC             | TTTCTTTT#IS407A        | TTTCTTT          | N.D.     |          |      |
| 8*Chr1_82_ISBma1     | N | 2002721280  | 8  | 968620-969496   | Chr1 | ISBma1 | CGAAA                 | GGTTCATCGCAGAAAA      | TTGCTCGATCGCAAGGCAC#   | #IS407A          | TTTTTTT  | #IS407A  | N.D. |
| 10*Chr1_73_ISBma1_A  | N | PRL20       | 10 | 974551-975855   | Chr1 | ISBma1 | GAGAG                 | GGTTCATCGCAGAAAA      | TTGCTCGATCGCAAGGCACACC | AAAAAAA'AAAAAAT  | AAAAAAA' | Y        |      |
| 9*Chr1_59_ISBma1_A   | N | SAVP1       | 9  | 999824-1001128  | Chr1 | ISBma1 | CACCG                 | GGTTCATCGCAGAAAA      | TTGCTCGATCGCAAGGCACACC | AAAAAAA'AAAAAAT  | AAAAAAA' | Y        |      |

**IS Bma 2**

|                      |   |             |    |                 |      | 5'-ext | 5'-IR   | ORF                      | 3'-IR                                | 3'-ext                    | 5'-DR            | 3'-DR    | rget | duplicates |
|----------------------|---|-------------|----|-----------------|------|--------|---------|--------------------------|--------------------------------------|---------------------------|------------------|----------|------|------------|
|                      |   |             |    |                 |      |        |         | <b>CAGATTGCTGACAAACC</b> |                                      |                           |                  |          |      |            |
|                      |   |             |    |                 |      |        |         |                          | <b>GGGTTGCTCAGCAGCTG</b>             |                           |                  |          |      |            |
| 2*Chr1_90_ISBma2_A   | N | fhm         | 2  | 1003833-1005047 | Chr1 | ISBma2 | #IS407/ | ~~~~~                    | TCCCAGAAAGACAAAACC                   | AAAGCCC(#IS407A           |                  | AAAGCCC  |      | N.D.       |
| 3*Chr1_90_ISBma2_A   | N | JHU         | 3  | 1012642-1013856 | Chr1 | ISBma2 | #IS407/ | ~~~~~                    | TCCCAGAAAGACAAAACC                   | AAAGCCC(#IS407A           |                  | AAAGCCC  |      | N.D.       |
| 7*Chr1_85_ISBma2_A   | N | NCTC_10247  | 7  | 1012716-1014290 | Chr1 | ISBma2 | GCCTC   | CAGATTGCTGACAAAC         | ATGCTGAAGACGCCATG(TCCCAGAAAGACAAAACC | AGCCAGC' AGCCAGCTTGCCTGGI | AGCCAGC'         | N        |      |            |
| 6*Chr1_44a_ISBma2    | R | NCTC_10229  | 6  | 1031963-1033543 | Chr1 | ISBma2 | ACGGC   | CAGATTGCTGACAAAC         | ATGCTGAAGACGCCATG(TCCCAGAAAGACAAAACC | AAAGCCG'AAACC             | CGGCTGGGAAAGCC   | AAAGCCG' | N    |            |
| 10*Chr1_90_ISBma2_A  | N | PRL20       | 10 | 1032539-1033726 | Chr1 | ISBma2 | #IS407/ | ~~~~~                    | TCCCAGAAAGACAAAACC                   | AAAGCCC(#IS407A           |                  | AAAGCCC  |      | N.D.       |
| 6*Chr1_41_ISBma2_A   | N | NCTC_10229  | 6  | 1055116-1056005 | Chr1 | ISBma2 | AATCA   | (CAGATTGCTGACAAAC        | ATGCTGAAGACGCCATG#                   | #IS407A                   | CCCTCCACTGGAGGGC | #IS407A  |      | N.D.       |
| 6*Chr1_39b_ISBma2    | R | NCTC_10229  | 6  | 1061840-1063411 | Chr1 | ISBma2 | GCAGG   | CAGATTGCTGACAAAC         | ATGCTGAAGACGCCATG(TCCCAGAAAGACAAAACC | AAAAACC                   | CCGCCCCTCGGGGGC  | AAAAACC' | N    |            |
| 9*Chr1_25b_ISBma2    | R | SAVP1       | 9  | 109336-110910   | Chr1 | ISBma2 | CGCCG   | CAGATTGCTGACAAAC         | ATGCTGAAGACGCCATG(TCCCAGAAAGACAAAACC | AGGCCG'CTG                | CGCAGGACGGCC     | AGGCCG'  | N    |            |
| 4*Chr1_90_ISBma2_A   | N | gb8_horse_4 | 4  | 1117195-1118409 | Chr1 | ISBma2 | #IS407/ | ~~~~~                    | TCCCAGAAAGACAAAACC                   | AAAGCCC(#IS407A           |                  | AAAGCCC  |      | N.D.       |
| 1*Chr1_90_ISBma2_A   | N | ATCC_23344  | 1  | 1124052-1125266 | Chr1 | ISBma2 | #IS407/ | ~~~~~                    | TCCCAGAAAGACAAAACC                   | AAAGCCC(#IS407A           |                  | AAAGCCC  |      | N.D.       |
| 6*Chr1_139a_ISBma2   | R | NCTC_10229  | 6  | 1142674-1144265 | Chr1 | ISBma2 | GCCCT   | (CAGATTGCTGACAAAC        | ATGCTGAAGACGCCATG(TCCCAGAAAGACAAAACC | AGCCCGA'                  | CCGGCGCATGGCCCG  | AGCCCGA' | N    |            |
| 8*Chr1_90_ISBma2_A   | N | 2002721280  | 8  | 1167212-1168399 | Chr1 | ISBma2 | #IS407/ | ~~~~~                    | TCCCAGAAAGACAAAACC                   | AAAGCCC(#IS407A           |                  | AAAGCCC  |      | N.D.       |
| 2*Chr1_85_ISBma2_A   | N | fhm         | 2  | 1198532-1200104 | Chr1 | ISBma2 | GCCTC   | CAGATTGCTGACAAAC         | ATGCTGAAGACGCCATG(TCCCAGAAAGACAAAACC | AGCCAGC' AGCCAGCTTGCCTGGI | AGCCAGC'         | Y        |      |            |
| 10*Chr1_23a_ISBma2_A | N | PRL20       | 10 | 120201-121772   | Chr1 | ISBma2 | CGCGC   | CAGATTGCTGACAAAC         | ATGCTGAAGACGCCATG(TCCCAGAAAGACAAAACC | ACCCGAG'ACC               | CGCAGGAAAGGCTG   | ACCCGAG' | Y    |            |
| 3*Chr1_85_ISBma2_A   | N | JHU         | 3  | 1209720-1211292 | Chr1 | ISBma2 | GCCTC   | CAGATTGCTGACAAAC         | ATGCTGAAGACGCCATG(TCCCAGAAAGACAAAACC | AGCCAGC' AGCCAGCTTGCCTGGI | AGCCAGC'         | Y        |      |            |
| 10*Chr1_85_ISBma2_A  | N | PRL20       | 10 | 1218305-1219877 | Chr1 | ISBma2 | GCCTC   | CAGATTGCTGACAAAC         | ATGCTGAAGACGCCATG(TCCCAGAAAGACAAAACC | AGCCAGC' AGCCAGCTTGCCTGGI | AGCCAGC'         | Y        |      |            |

|                                       |     |             |    |                 |      |        |                                                                                          |      |
|---------------------------------------|-----|-------------|----|-----------------|------|--------|------------------------------------------------------------------------------------------|------|
| 8*Chr1_85_ISBma2_A                    | N   | 2002721280  | 8  | 1219726-1221298 | Chr1 | ISBma2 | GCCTCAGATTGCTGACAAACATGCTGAAGACGCCATGCTCCAGAAAGACAAAACCCAGCCAGCAGCCAGCTTGGCTGGIAGCCAGC   | Y    |
| 6*Chr1_139b_ISBrr6*Chr1_141b_ISBma2_A | R   | NCTC_10229  | 6  | 1224724-1226315 | Chr1 | ISBma2 | CCTCCAGATTGCTGACAAACATGCTGAAGACGCCATGCTCCAGAAAGACAAAACCCAGCCCGGCGGAAACAGCGGTTGAGCCCGG    | N    |
| 7*Chr1_101_ISBma7*Chr1_102_ISBma2_A   | D   | NCTC_10247  | 7  | 1257256-1258828 | Chr1 | ISBma2 | GCATCCAGATTGCTGACAAACATGCTGAAGACGCCATGCTCCAGAAAGACAAAACCCAGCCCGGTAGCCCGCCGGAAGCGGGCCGT   | N    |
| 5*Chr1_85_ISBma2_A                    | N   | ATCC_10399  | 5  | 1260531-1262103 | Chr1 | ISBma2 | GCCTCAGATTGCTGACAAACATGCTGAAGACGCCATGCTCCAGAAAGACAAAACCCAGCCAGCAGCCAGCTTGGCTGGIAGCCAGC   | Y    |
| 7*Chr1_39a_ISBma7*Chr1_44a_ISBma2_A   | R   | NCTC_10247  | 7  | 128672-130244   | Chr1 | ISBma2 | ACCTGAGATTGCTGACAAACATGCTGAAGACGCCATGCTCCAGAAAGACAAAACCCAGCCCTCAGCCCGGCTGGAAGCCAGCCCTC   | N    |
| 4*Chr1_85_ISBma2_A                    | N   | gb8_horse_4 | 4  | 1307221-1308793 | Chr1 | ISBma2 | GCCTCAGATTGCTGACAAACATGCTGAAGACGCCATGCTCCAGAAAGACAAAACCCAGCCAGCAGCCAGCTTGGCTGGIAGCCAGC   | Y    |
| 1*Chr1_85_ISBma2_A                    | N   | ATCC_23344  | 1  | 1315507-1317079 | Chr1 | ISBma2 | GCCTCAGATTGCTGACAAACATGCTGAAGACGCCATGCTCCAGAAAGACAAAACCCAGCCAGCAGCCAGCTTGGCTGGIAGCCAGC   | Y    |
| 6*Chr1_144_ISBma2_B                   | N   | NCTC_10229  | 6  | 1324314-1325889 | Chr1 | ISBma2 | GCCGCAGATTGCTGACAAACATGCTGAAGACGCCATGCTCCAGAAAGACAAAACCCAGCCCGGTAGCCCGCCGATTCGCGGAGCCCGC | Y    |
| 7*Chr1_104_ISBma2_A                   | N   | NCTC_10247  | 7  | 1345232-1346804 | Chr1 | ISBma2 | TACCCAGATTGCTGACAAACATGCTGAAGACGCCATGCTCCAGAAAGACAAAACCCAGCCGCGIACCCGCGCATTCCGCGIACCCGCG | Y    |
| 6*Chr1_22b_ISBma6*Chr1_147_ISBma2_A   | D-R | NCTC_10229  | 6  | 1369886-1371461 | Chr1 | ISBma2 | GCCGCAGATTGCTGACAAACATGCTGAAGACGCCATGCTCCAGAAAGACAAAACCCAGCCGCGIACCCGCGGAGACGCGAGCCGCG   | N    |
| 6*Chr1_23a_ISBma2_A                   | N   | NCTC_10229  | 6  | 1403305-1404881 | Chr1 | ISBma2 | CGCGCAGATTGCTGACAAACATGCTGAAGACGCCATGCTCCAGAAAGACAAAACCCAGCCAGIACCCGACGCGAAGCGTACCCGAGI  | Y    |
| 6*Chr1_24_ISBma2_A                    | N   | NCTC_10229  | 6  | 1432886-1432917 | Chr1 | ISBma2 | GGCAAAGATTGCTGACAAACATGCTGAAGACGCCATGCTCCAGAAAGACAAAACCCAGCCCGIACCCGCGCTCGGAGGCAACCCG    | Y    |
| 10*Chr1_22a_ISBma2_A                  | R   | PRL20       | 10 | 1439664-1448000 | Chr1 | ISBma2 | #contig ~~~~~ TCCAGAAAGACAAAACCCAGCCCGIACCCGCGCTCGGAGGCAACCCG                            | N.D. |
| 2*Chr1_100_ISBma2_B                   | N   | fmh         | 2  | 1446086-1447658 | Chr1 | ISBma2 | GCGCGCAGATTGCTGACAAACATGCTGAAGACGCCATGCTCCAGAAAGACAAAACCCAGTGGGCAATGGGCGGAAACCGAATGGG    | Y    |
| 2*Chr1_101_ISBma2*Chr1_102_ISBma2_A   | D   | fmh         | 2  | 1449099-1450671 | Chr1 | ISBma2 | GCATCCAGATTGCTGACAAACATGCTGAAGACGCCATGCTCCAGAAAGACAAAACCCAGCCCGGTAGCCCGCCGGAAGCGGGCCGT   | N    |
| 3*Chr1_100_ISBma2_B                   | N   | JHU         | 3  | 1455405-1456977 | Chr1 | ISBma2 | GCGCGCAGATTGCTGACAAACATGCTGAAGACGCCATGCTCCAGAAAGACAAAACCCAGTGGGCAATGGGCGGAAACCGAATGGG    | Y    |
| 3*Chr1_101_ISBma3*Chr1_102_ISBma2_A   | D   | JHU         | 3  | 1458418-1459990 | Chr1 | ISBma2 | GCATCCAGATTGCTGACAAACATGCTGAAGACGCCATGCTCCAGAAAGACAAAACCCAGCCCGGTAGCCCGCCGGAAGCGGGCCGT   | N    |
| 6*Chr1_25a_ISBma6*Chr1_28a_ISBma2_A   | R   | NCTC_10229  | 6  | 1461808-1463379 | Chr1 | ISBma2 | TCCGAAAGATTGCTGACAAACATGCTGAAGACGCCATGCTCCAGAAAGACAAAACCCAGCCCGIACCCGCGCTCGCGGAGCCGCG    | N    |
| 8*Chr1_101_ISBma8*Chr1_102_ISBma2_A   | D   | 2002721280  | 8  | 1463360-1464932 | Chr1 | ISBma2 | GCATCCAGATTGCTGACAAACATGCTGAAGACGCCATGCTCCAGAAAGACAAAACCCAGCCCGGTAGCCCGCCGGAAGCGGGCCGT   | N    |
| 6*Chr1_85_ISBma2_A                    | N   | NCTC_10229  | 6  | 146802-148374   | Chr1 | ISBma2 | GCCGCAGATTGCTGACAAACATGCTGAAGACGCCATGCTCCAGAAAGACAAAACCCAGCCAGCAGCCAGCTTGGCTGGIAGCCAGC   | N    |
| 7*Chr1_105a_ISBm7*Chr1_107a_ISBma2_A  | R   | NCTC_10247  | 7  | 1482665-1484237 | Chr1 | ISBma2 | TCCGGCAGATTGCTGACAAACATGCTGAAGACGCCATGCTCCAGAAAGACAAAACCCAGCCCGIACCCGCGCTTTCAGCGCAAGCC   | N    |
| 7*Chr1_105b_ISBrr7*Chr1_107b_ISBma2_A | R   | NCTC_10247  | 7  | 1486716-1488288 | Chr1 | ISBma2 | AACGACAGATTGCTGACAAACATGCTGAAGACGCCATGCTCCAGAAAGACAAAACCCAGCCCGIACCCGCGCTTTCAGCGCAAGCC   | N    |
| 5*Chr1_90_ISBma2_A                    | N   | ATCC_10399  | 5  | 1495313-1496527 | Chr1 | ISBma2 | #IS407 ~~~~~ TCCAGAAAGACAAAACCCAGCCCGIACCCGCGCTTTCAGCGCAAGCC                             | N.D. |
| 9*Chr1_90_ISBma2_A                    | N   | SAVP1       | 9  | 1498063-1499250 | Chr1 | ISBma2 | #IS407 ~~~~~ TCCAGAAAGACAAAACCCAGCCCGIACCCGCGCTTTCAGCGCAAGCC                             | N.D. |
| 10*Chr1_101_ISBrr10*Chr1_102_ISBma2_A | D   | PRL20       | 10 | 1506540-1508112 | Chr1 | ISBma2 | GCATCCAGATTGCTGACAAACATGCTGAAGACGCCATGCTCCAGAAAGACAAAACCCAGCCCGGTAGCCCGCCGGAAGCGGGCCGT   | N    |
| 6*Chr1_25b_ISBma6*Chr1_28b_ISBma2_A   | R   | NCTC_10229  | 6  | 1514301-1515875 | Chr1 | ISBma2 | CGCGCAGATTGCTGACAAACATGCTGAAGACGCCATGCTCCAGAAAGACAAAACCCAGCCCGIACCCGCGCTTTCAGCGCAAGCC    | N    |
| 7*Chr1_108_ISBma2_A                   | N   | NCTC_10247  | 7  | 1518121-1519693 | Chr1 | ISBma2 | CGTGCAGATTGCTGACAAACATGCTGAAGACGCCATGCTCCAGAAAGACAAAACCCAGCCCGIACCCGCGCTTTCAGCGCAAGCC    | Y    |
| 2*Chr1_104_ISBma2_A                   | N   | fmh         | 2  | 1537752-1539324 | Chr1 | ISBma2 | TACCCAGATTGCTGACAAACATGCTGAAGACGCCATGCTCCAGAAAGACAAAACCCAGCCCGIACCCGCGCTTTCAGCGCAAGCC    | Y    |
| 7*Chr1_110_ISBma2_A                   | N   | NCTC_10247  | 7  | 1541726-1543298 | Chr1 | ISBma2 | TCCCGCAGATTGCTGACAAACATGCTGAAGACGCCATGCTCCAGAAAGACAAAACCCAGCCCGIACCCGCGCTTTCAGCGCAAGCC   | N    |
| 3*Chr1_104_ISBma2_A                   | N   | JHU         | 3  | 1548943-1550515 | Chr1 | ISBma2 | TACCCAGATTGCTGACAAACATGCTGAAGACGCCATGCTCCAGAAAGACAAAACCCAGCCCGIACCCGCGCTTTCAGCGCAAGCC    | Y    |
| 4*Chr1_100_ISBma2_B                   | N   | gb8_horse_4 | 4  | 1548991-1550563 | Chr1 | ISBma2 | GCGCGCAGATTGCTGACAAACATGCTGAAGACGCCATGCTCCAGAAAGACAAAACCCAGTGGGCAATGGGCGGAAACCGAATGGG    | Y    |
| 8*Chr1_104_ISBma2_A                   | N   | 2002721280  | 8  | 1551398-1552969 | Chr1 | ISBma2 | TACCCAGATTGCTGACAAACATGCTGAAGACGCCATGCTCCAGAAAGACAAAACCCAGCCCGIACCCGCGCTTTCAGCGCAAGCC    | Y    |
| 4*Chr1_101_ISBma4*Chr1_102_ISBma2_A   | D   | gb8_horse_4 | 4  | 1552004-1553576 | Chr1 | ISBma2 | GCATCCAGATTGCTGACAAACATGCTGAAGACGCCATGCTCCAGAAAGACAAAACCCAGCCCGGTAGCCCGCCGGAAGCGGGCCGT   | N    |
| 5*Chr1_19a_ISBma2_A                   | N   | ATCC_10399  | 5  | 155357-156927   | Chr1 | ISBma2 | CACCCAGATTGCTGACAAACATGCTGAAGACGCCATGCTCCAGAAAGACAAAACCCAGCCGAGGGCGTTCGCCCTCCGAGCCGAG    | N    |
| 1*Chr1_100_ISBma2_B                   | N   | ATCC_23344  | 1  | 1558411-1559983 | Chr1 | ISBma2 | GCGCGCAGATTGCTGACAAACATGCTGAAGACGCCATGCTCCAGAAAGACAAAACCCAGTGGGCAATGGGCGGAAACCGAATGGG    | Y    |
| 1*Chr1_101_ISBma1*Chr1_102_ISBma2_A   | D   | ATCC_23344  | 1  | 1561424-1562996 | Chr1 | ISBma2 | GCATCCAGATTGCTGACAAACATGCTGAAGACGCCATGCTCCAGAAAGACAAAACCCAGCCCGGTAGCCCGCCGGAAGCGGGCCGT   | N    |
| 7*Chr1_52_ISBma2_A                    | N   | NCTC_10247  | 7  | 1590531-1592103 | Chr1 | ISBma2 | CCGGAAGATTGCTGACAAACATGCTGAAGACGCCATGCTCCAGAAAGACAAAACCCAGCCCGIACCCGCGCTTTCAGCGCAAGCC    | Y    |
| 6*Chr1_163_ISBma2_A                   | N   | NCTC_10229  | 6  | 1592743-1594343 | Chr1 | ISBma2 | CCTCCAGATTGCTGACAAACATGCTGAAGACGCCATGCTCCAGAAAGACAAAACCCAGTCCGCTCGCGAAGCGGAGTGCTCGC      | Y    |
| 10*Chr1_104_ISBma2_A                  | N   | PRL20       | 10 | 1594486-1596058 | Chr1 | ISBma2 | TACCCAGATTGCTGACAAACATGCTGAAGACGCCATGCTCCAGAAAGACAAAACCCAGCCGCGIACCCGCGCATTCCGCGIACCCGCG | Y    |
| 6*Chr1_164_ISBma2_B                   | N   | NCTC_10229  | 6  | 1625978-1627550 | Chr1 | ISBma2 | ATGCCAGATTGCTGACAAACATGCTGAAGACGCCATGCTCCAGAAAGACAAAACCCAGCCAGIACCCGACGCGGAGGGGAGCGAG    | Y    |
| 9*Chr1_25a_ISBma9*Chr1_28a_ISBma2_A   | R   | SAVP1       | 9  | 163290-164556   | Chr1 | ISBma2 | TCCGAAAGATTGCTGACAAACATGCTGAAGACGCCATGCTCCAGAAAGACAAAACCCAGCCCGIACCCGCGCTTTCAGCGCAAGCC   | N.D. |
| 4*Chr1_104_ISBma2_A                   | N   | gb8_horse_4 | 4  | 1639670-1641242 | Chr1 | ISBma2 | TACCCAGATTGCTGACAAACATGCTGAAGACGCCATGCTCCAGAAAGACAAAACCCAGCCGCGIACCCGCGCATTCCGCGIACCCGCG | Y    |
| 7*Chr1_50_ISBma2_A                    | N   | NCTC_10247  | 7  | 1645048-1646622 | Chr1 | ISBma2 | GCGACAGATTGCTGACAAACATGCTGAAGACGCCATGCTCCAGAAAGACAAAACCCAGCCCGIACCCGCGCTTTCAGCGCAAGCC    | Y    |
| 1*Chr1_104_ISBma2_A                   | N   | ATCC_23344  | 1  | 1649393-1650965 | Chr1 | ISBma2 | TACCCAGATTGCTGACAAACATGCTGAAGACGCCATGCTCCAGAAAGACAAAACCCAGCCGCGIACCCGCGCATTCCGCGIACCCGCG | Y    |
| 6*Chr1_1a_ISBma26*Chr1_159b_ISBma2_A  | R   | NCTC_10229  | 6  | 1674101-1675677 | Chr1 | ISBma2 | AGCTGAGATTGCTGACAAACATGCTGAAGACGCCATGCTCCAGAAAGACAAAACCCAGCCCGIACCCGCGCTTTCAGCGCAAGCC    | N    |
| 2*Chr1_105a_ISBrr2*Chr1_107a_ISBma2_A | R   | fmh         | 2  | 1677003-1678575 | Chr1 | ISBma2 | TCCGGCAGATTGCTGACAAACATGCTGAAGACGCCATGCTCCAGAAAGACAAAACCCAGCCCGIACCCGCGCTTTCAGCGCAAGCC   | N    |
| 2*Chr1_105b_ISBrr2*Chr1_107b_ISBma2_A | R   | fmh         | 2  | 1681054-1682626 | Chr1 | ISBma2 | AACGAAGATTGCTGACAAACATGCTGAAGACGCCATGCTCCAGAAAGACAAAACCCAGCCCGIACCCGCGCTTTCAGCGCAAGCC    | N    |
| 3*Chr1_105a_ISBrr3*Chr1_107a_ISBma2_A | R   | JHU         | 3  | 1688841-1690413 | Chr1 | ISBma2 | TCCGGCAGATTGCTGACAAACATGCTGAAGACGCCATGCTCCAGAAAGACAAAACCCAGCCCGIACCCGCGCTTTCAGCGCAAGCC   | N    |
| 8*Chr1_105a_ISBrr8*Chr1_107a_ISBma2_A | R   | 2002721280  | 8  | 1688922-1690494 | Chr1 | ISBma2 | TCCGGCAGATTGCTGACAAACATGCTGAAGACGCCATGCTCCAGAAAGACAAAACCCAGCCCGIACCCGCGCTTTCAGCGCAAGCC   | N    |
| 3*Chr1_105b_ISBrr3*Chr1_107b_ISBma2_A | R   | JHU         | 3  | 1692892-1694464 | Chr1 | ISBma2 | AACGAAGATTGCTGACAAACATGCTGAAGACGCCATGCTCCAGAAAGACAAAACCCAGCCCGIACCCGCGCTTTCAGCGCAAGCC    | N    |
| 8*Chr1_105b_ISBrr8*Chr1_107b_ISBma2_A | R   | 2002721280  | 8  | 1692973-1694545 | Chr1 | ISBma2 | AACGAAGATTGCTGACAAACATGCTGAAGACGCCATGCTCCAGAAAGACAAAACCCAGCCCGIACCCGCGCTTTCAGCGCAAGCC    | N    |
| 5*Chr1_100_ISBma2_B                   | N   | ATCC_10399  | 5  | 1712081-1713653 | Chr1 | ISBma2 | GCGCGCAGATTGCTGACAAACATGCTGAAGACGCCATGCTCCAGAAAGACAAAACCCAGTGGGCAATGGGCGGAAACCGAATGGG    | Y    |
| 2*Chr1_108_ISBma2_A                   | N   | fmh         | 2  | 1713107-1714679 | Chr1 | ISBma2 | GCGTGAGATTGCTGACAAACATGCTGAAGACGCCATGCTCCAGAAAGACAAAACCCAGCCCGIACCCGCGCTTTCAGCGCAAGCC    | Y    |
| 5*Chr1_101_ISBma5*Chr1_102_ISBma2_A   | D   | ATCC_10399  | 5  | 1715094-1716666 | Chr1 | ISBma2 | GCATCCAGATTGCTGACAAACATGCTGAAGACGCCATGCTCCAGAAAGACAAAACCCAGCCCGGTAGCCCGCCGGAAGCGGGCCGT   | Y    |
| 2*Chr1_109_ISBma2_B                   | N   | fmh         | 2  | 1717544-1719116 | Chr1 | ISBma2 | AGGCAAGATTGCTGACAAACATGCTGAAGACGCCATGCTCCAGAAAGACAAAACCCAGCCCGIACCCGCGCTTTCAGCGCAAGCC    | Y    |
| 8*Chr1_108_ISBma2_A                   | N   | 2002721280  | 8  | 1724386-1725958 | Chr1 | ISBma2 | CGTGGCAGATTGCTGACAAACATGCTGAAGACGCCATGCTCCAGAAAGACAAAACCCAGCCCGIACCCGCGCTTTCAGCGCAAGCC   | Y    |
| 3*Chr1_108_ISBma2_A                   | N   | JHU         | 3  | 1725497-1727069 | Chr1 | ISBma2 | GCGTGAGATTGCTGACAAACATGCTGAAGACGCCATGCTCCAGAAAGACAAAACCCAGCCCGIACCCGCGCTTTCAGCGCAAGCC    | Y    |
| 3*Chr1_109_ISBma2_B                   | N   | JHU         | 3  | 1729934-1731506 | Chr1 | ISBma2 | AGGCAAGATTGCTGACAAACATGCTGAAGACGCCATGCTCCAGAAAGACAAAACCCAGCCCGIACCCGCGCTTTCAGCGCAAGCC    | Y    |

|                                       |     |             |    |                 |      |        |                                                                                              |      |
|---------------------------------------|-----|-------------|----|-----------------|------|--------|----------------------------------------------------------------------------------------------|------|
| 10*Chr1_105a_ISB10*Chr1_107a_ISBma2_A | R   | PRL20       | 10 | 1731413-1732985 | Chr1 | ISBma2 | TCGGG CAGATTGCTGACAAAC ATGCTGAAGACGCCATG(TCCAGAAAGACAAAACCGCCTCC/CCCGCTGGTTTCAGCGCGCGCTCC/   | N    |
| 9*Chr1_85_ISBma2_A                    | N   | SAVP1       | 9  | 1732152-1733022 | Chr1 | ISBma2 | #IS407/~~~~~ TCCAGAAAGACAAAACCGCAGC#IS407A AGCCAGC                                           | N.D. |
| 9*Chr1_85-1_ISBma2_A                  | N   | SAVP1       | 9  | 1733431-1734964 | Chr1 | ISBma2 | GCCTC/CAGATTGCTGACAAAC ATGCTGAAGACGCCATG(ACGCTGCGAAGAACGCCG/#IS407A AGCCAGCTTCCGCTGG/#IS407A | N.D. |
| 10*Chr1_106_ISBma2_C                  | N   | PRL20       | 10 | 1736522-1738094 | Chr1 | ISBma2 | TCAGC/ CAGATTGCTGACAAAC ATGCTGAAGACGCCATG(TCCAGAAAGACAAAACCGAAGCCCC(GCCCGCTCAATACGGG/AAGCCCC | N    |
| 2*Chr1_110_ISBma2_A                   | N   | fmh         | 2  | 1738590-1740041 | Chr1 | ISBma2 | #IS407/~~~~~ TCCAGAAAGACAAAACCGAAGCCCC(#IS407A AAGCCCTC                                      | N.D. |
| 10*Chr1_105b_ISB10*Chr1_107b_ISBma2_A | R   | PRL20       | 10 | 1740573-1742147 | Chr1 | ISBma2 | AACGA CAGATTGCTGACAAAC ATGCTGAAGACGCCATG(TCCAGAAAGACAAAACCGAAGCCCC(CCCGCTGGTTTCAGCGC/AAGCCCC | N    |
| 8*Chr1_110_ISBma2_A                   | N   | 2002721280  | 8  | 1747635-1749207 | Chr1 | ISBma2 | TCCCG/ CAGATTGCTGACAAAC ATGCTGAAGACGCCATG(TCCAGAAAGACAAAACCGAAGCCCT(GCCCTGCGAGTG/CAG/AAGCCCT | N    |
| 3*Chr1_110_ISBma2_A                   | N   | JHU         | 3  | 1750695-1752146 | Chr1 | ISBma2 | #IS407/~~~~~ TCCAGAAAGACAAAACCGAAGCCCTC(#IS407A AAGCCCTC                                     | N.D. |
| 10*Chr1_108_ISBma2_A                  | N   | PRL20       | 10 | 1771866-1773437 | Chr1 | ISBma2 | CGTGG CAGATTGCTGACAAAC ATGCTGAAGACGCCATG(TCCAGAAAGACAAAACCGGGGCGG GGGGCGCTTCCGGCCG GGGGCGC   | Y    |
| 10*Chr1_109_ISBma2_B                  | N   | PRL20       | 10 | 1776302-1777874 | Chr1 | ISBma2 | AGGCA CAGATTGCTGACAAAC ATGCTGAAGACGCCATG(TCCAGAAAGACAAAACCGGACGGG GGACGGCGGGACGCC GGACGGC    | Y    |
| 4*Chr1_105a_ISBm4*Chr1_107a_ISBma2_A  | R   | gb8_horse_4 | 4  | 1776616-1778188 | Chr1 | ISBma2 | TCCGG CAGATTGCTGACAAAC ATGCTGAAGACGCCATG(TCCAGAAAGACAAAACCGAAGCCCT(CCCGCTGGTTTCAGCGC/AAGCCCT | N    |
| 4*Chr1_13a_ISBma4*Chr1_32b_ISBma2_A   | R   | gb8_horse_4 | 4  | 177854-179426   | Chr1 | ISBma2 | GCGAC CAGATTGCTGACAAAC ATGCTGAAGACGCCATG(TCCAGAAAGACAAAACCGAGCGGC GACCGCGTGGCGGTG GAGCGGC    | N    |
| 4*Chr1_105b_ISBm4*Chr1_107b_ISBma2_A  | R   | gb8_horse_4 | 4  | 1780667-1782239 | Chr1 | ISBma2 | AACGA CAGATTGCTGACAAAC ATGCTGAAGACGCCATG(TCCAGAAAGACAAAACCGAAGCCCT(CCCGCTGGTTTCAGCGC/AAGCCCT | N    |
| 1*Chr1_105a_ISBm1*Chr1_107a_ISBma2_A  | R   | ATCC_23344  | 1  | 1786992-1788564 | Chr1 | ISBma2 | TCCGG CAGATTGCTGACAAAC ATGCTGAAGACGCCATG(TCCAGAAAGACAAAACCGAAGCCCT(CCCGCTGGTTTCAGCGC/AAGCCCT | N    |
| 1*Chr1_13a_ISBma1*Chr1_32b_ISBma2_A   | R   | ATCC_23344  | 1  | 178751-180323   | Chr1 | ISBma2 | GCGAC CAGATTGCTGACAAAC ATGCTGAAGACGCCATG(TCCAGAAAGACAAAACCGGACGGG GACCGCGTGGCGGTG GAGCGGC    | N    |
| 6*Chr1_148_ISBma6*Chr1_159a_ISBma2_A  | D-R | NCTC_10229  | 6  | 1787702-1789301 | Chr1 | ISBma2 | GGATT/CAGATTGCTGACAAAC ATGCTGAAGACGCCATG(TCCAGAAAGACAAAACCGAGCCCTC/AGGGCCGATGAAGCGAGGCCCT    | N    |
| 1*Chr1_105b_ISBm1*Chr1_107b_ISBma2_A  | R   | ATCC_23344  | 1  | 1791043-1792615 | Chr1 | ISBma2 | AACGA CAGATTGCTGACAAAC ATGCTGAAGACGCCATG(TCCAGAAAGACAAAACCGAAGCCCT(CCCGCTGGTTTCAGCGC/AAGCCCT | N    |
| 6*Chr1_151a_ISBma2_A                  | R   | NCTC_10229  | 6  | 1796424-1797996 | Chr1 | ISBma2 | ATTTCC/CAGATTGCTGACAAAC ATGCTGAAGACGCCATG(TCCAGAAAGACAAAACCGAAGCCCTC/AGGGCCGATGAAGCGAGGCCCT  | N    |
| 8*Chr1_52_ISBma2_A                    | N   | 2002721280  | 8  | 1796447-1798019 | Chr1 | ISBma2 | CCGGA CAGATTGCTGACAAAC ATGCTGAAGACGCCATG(TCCAGAAAGACAAAACCGACGGCG/ACGGCCGCTC/CAGC/ACGGCCG    | Y    |
| 10*Chr1_110_ISBma2_A                  | N   | PRL20       | 10 | 1797097-1798548 | Chr1 | ISBma2 | #IS407/~~~~~ TCCAGAAAGACAAAACCGAAGCCCTC(#IS407A AAGCCCTC                                     | N.D. |
| 5*Chr1_104_ISBma2_A                   | N   | ATCC_10399  | 5  | 1803108-1804680 | Chr1 | ISBma2 | TACCC/CAGATTGCTGACAAAC ATGCTGAAGACGCCATG(TCCAGAAAGACAAAACCGGGGCG/ACGGCGCATTGCGGCT/ACGGCGC    | Y    |
| 4*Chr1_108_ISBma2_A                   | N   | gb8_horse_4 | 4  | 1812072-1813644 | Chr1 | ISBma2 | GCGTG CAGATTGCTGACAAAC ATGCTGAAGACGCCATG(TCCAGAAAGACAAAACCGGGGCGG GGGGCGCTTCCGGCCG GGGGCGC   | Y    |
| 4*Chr1_109_ISBma2_B                   | N   | gb8_horse_4 | 4  | 1816509-1818081 | Chr1 | ISBma2 | AGGCA CAGATTGCTGACAAAC ATGCTGAAGACGCCATG(TCCAGAAAGACAAAACCGGACGGG GGGACGGCGGGACGG GGGACGG    | Y    |
| 1*Chr1_108_ISBma2_A                   | N   | ATCC_23344  | 1  | 1822448-1824020 | Chr1 | ISBma2 | GCGTG CAGATTGCTGACAAAC ATGCTGAAGACGCCATG(TCCAGAAAGACAAAACCGGGGCGG GGGGCGCTTCCGGCCG GGGGCGC   | Y    |
| 1*Chr1_109_ISBma2_B                   | N   | ATCC_23344  | 1  | 1826885-1828457 | Chr1 | ISBma2 | AGGCA CAGATTGCTGACAAAC ATGCTGAAGACGCCATG(TCCAGAAAGACAAAACCGGGGCGG GGGACGGCGGGACGG GGGACGG    | Y    |
| 7*Chr1_121_ISBma2_A                   | N   | NCTC_10247  | 7  | 183581-183721   | Chr1 | ISBma2 | #IS407/~~~~~ TCCAGAAAGACAAAACCGAAGCCCTC(#IS407A AAGCCCTC                                     | N.D. |
| 4*Chr1_110_ISBma2_A                   | N   | gb8_horse_4 | 4  | 1837077-1838528 | Chr1 | ISBma2 | #IS407/~~~~~ TCCAGAAAGACAAAACCGAAGCCCTC(#IS407A AAGCCCTC                                     | N.D. |
| 1*Chr1_110_ISBma2_A                   | N   | ATCC_23344  | 1  | 1847646-1849097 | Chr1 | ISBma2 | #IS407/~~~~~ TCCAGAAAGACAAAACCGAAGCCCTC(#IS407A AAGCCCTC                                     | N.D. |
| 8*Chr1_50_ISBma2_A                    | N   | 2002721280  | 8  | 1850947-1852519 | Chr1 | ISBma2 | GCGAC CAGATTGCTGACAAAC ATGCTGAAGACGCCATG(TCCAGAAAGACAAAACCGGGGCGG GGGGCGGACGTACTC GGGGCGC    | Y    |
| 6*Chr1_1b_ISBma6*Chr1_151b_ISBma2_A   | R   | NCTC_10229  | 6  | 1930938-1932510 | Chr1 | ISBma2 | AGCCG CAGATTGCTGACAAAC ATGCTGAAGACGCCATG(TCCAGAAAGACAAAACCGAAGCCCTC/AGGGCCGCTTCCGGCC/AGCCCGC | N    |
| 9*Chr1_24_ISBma2_A                    | N   | SAVP1       | 9  | 193441-195012   | Chr1 | ISBma2 | GGCAA CAGATTGCTGACAAAC ATGCTGAAGACGCCATG(TCCAGAAAGACAAAACCGAGCCCTC/AGCCCGCTCGGAGCG/AGCCCGC   | N    |
| 5*Chr1_105a_ISBm5*Chr1_107a_ISBma2_A  | R   | ATCC_10399  | 5  | 1940356-1941928 | Chr1 | ISBma2 | TCCGG CAGATTGCTGACAAAC ATGCTGAAGACGCCATG(TCCAGAAAGACAAAACCGAAGCCCT(CCCGCTGGTTTCAGCGC/AAGCCCT | N    |
| 5*Chr1_105b_ISBm5*Chr1_107b_ISBma2_A  | R   | ATCC_10399  | 5  | 1944407-1945979 | Chr1 | ISBma2 | AACGA CAGATTGCTGACAAAC ATGCTGAAGACGCCATG(TCCAGAAAGACAAAACCGAAGCCCT(CCCGCTGGTTTCAGCGC/AAGCCCT | N    |
| 5*Chr1_108_ISBma2_A                   | N   | ATCC_10399  | 5  | 1975805-1977377 | Chr1 | ISBma2 | CGTG CAGATTGCTGACAAAC ATGCTGAAGACGCCATG(TCCAGAAAGACAAAACCGGGGCGG GGGGCGCTTCCGGCCG GGGGCGC    | Y    |
| 9*Chr1_101_ISBma9*Chr1_102_ISBma2_A   | D   | SAVP1       | 9  | 1977656-1979228 | Chr1 | ISBma2 | GCATC/CAGATTGCTGACAAAC ATGCTGAAGACGCCATG(TCCAGAAAGACAAAACCGGGGCGT/AGCCCGC/GAGCGG/AGCCCGC     | N    |
| 7*Chr1_120_ISBma2_A                   | N   | NCTC_10247  | 7  | 198007-199579   | Chr1 | ISBma2 | AGCCA CAGATTGCTGACAAAC ATGCTGAAGACGCCATG(TCCAGAAAGACAAAACCGGCGCC/GGGCCCGC/CAAGGGG/GGGCCCT    | Y    |
| 6*Chr1_90_ISBma2_A                    | N   | NCTC_10229  | 6  | 199692-200879   | Chr1 | ISBma2 | #IS407/~~~~~ TCCAGAAAGACAAAACCGAAGCCCTC(#IS407A AAGCCCTC                                     | N.D. |
| 7*Chr1_109_ISBma2_B                   | N   | NCTC_10247  | 7  | 1998101-1999674 | Chr1 | ISBma2 | GTTCC/CAGATTGCTGACAAAC ATGCTGAAGACGCCATG(TCCAGAAAGACAAAACCGGCGAT/AGGCGATGCGCGCAG/AGCCGAT     | Y    |
| 5*Chr1_110_ISBma2_A                   | N   | ATCC_10399  | 5  | 1999400-2000851 | Chr1 | ISBma2 | #IS407/~~~~~ TCCAGAAAGACAAAACCGAAGCCCTC(#IS407A AAGCCCTC                                     | N.D. |
| 6*Chr1_155_ISBma2_B                   | N   | NCTC_10229  | 6  | 2001853-2003425 | Chr1 | ISBma2 | CCTTC/CAGATTGCTGACAAAC ATGCTGAAGACGCCATG(TCCAGAAAGACAAAACCGGCTGGA/GGCTGGAATCCGGGGA/GGCTGGA   | Y    |
| 6*Chr1_22a_ISBma2_A                   | R   | NCTC_10229  | 6  | 2020996-2022558 | Chr1 | ISBma2 | ~~~~~AGGGGGCAGGTCAA/ATGCTGAAGACGCCATG(TCCAGAAAGACAAAACCGAGCCCTC/AGCCCATAGCCCTATC/AGCCCGC     | N    |
| 7*Chr1_46a_ISBma2_A                   | N   | NCTC_10247  | 7  | 2062315-2063887 | Chr1 | ISBma2 | GGAAA CAGATTGCTGACAAAC ATGCTGAAGACGCCATG(TCCAGAAAGACAAAACCGAAAAGC/AAAAGCGCGCCCTAGG AAAAGCG   | Y    |
| 9*Chr1_104_ISBma2_A                   | N   | SAVP1       | 9  | 2065693-2067265 | Chr1 | ISBma2 | TACCC/CAGATTGCTGACAAAC ATGCTGAAGACGCCATG(TCCAGAAAGACAAAACCGAGCCG/ACCGCGCATTCCGCGC/ACCGCGC    | Y    |
| 6*Chr1_19a_ISBma2_A                   | N   | NCTC_10229  | 6  | 2089532-2091106 | Chr1 | ISBma2 | GCACG CAGATTGCTGACAAAC ATGCTGAAGACGCCATG(TCCAGAAAGACAAAACCGAGGAG/AGCCGGAGGGCGTCCG/AGCGGAG    | Y    |
| 7*Chr1_41_ISBma2_A                    | N   | NCTC_10247  | 7  | 2106381-2107270 | Chr1 | ISBma2 | AATCA/CAGATTGCTGACAAAC ATGCTGAAGACGCCATG(TCCAGAAAGACAAAACCGAAGCCCTC/AGCCCATGGAGG/AGC/IS407A  | N.D. |
| 7*Chr1_39b_ISBm7*Chr1_44b_ISBma2_A    | R   | NCTC_10247  | 7  | 2113105-2114677 | Chr1 | ISBma2 | GCAGG CAGATTGCTGACAAAC ATGCTGAAGACGCCATG(TCCAGAAAGACAAAACCGAAAAC/CCCGCCGCTCCGGCGG AAAAAC     | N    |
| 9*Chr1_148_ISBma9*Chr1_159a_ISBma2_A  | D-R | SAVP1       | 9  | 21273-22845     | Chr1 | ISBma2 | GGATT/CAGATTGCTGACAAAC ATGCTGAAGACGCCATG(TCCAGAAAGACAAAACCGAGCCCTC/AGGGCCGATGAAGCGAGGCCCT    | N    |
| 10*Chr1_128_ISBma2_C                  | N   | PRL20       | 10 | 2152775-2154347 | Chr1 | ISBma2 | CCCTC/CAGATTGCTGACAAAC ATGCTGAAGACGCCATG(TCCAGAAAGACAAAACCGAAGCCCTC/AGCCCGC/AGGGCCG          | Y    |
| 5*Chr1_32a_ISBma2_A                   | N   | ATCC_10399  | 5  | 215734-217306   | Chr1 | ISBma2 | TGTGT/CAGATTGCTGACAAAC ATGCTGAAGACGCCATG(TCCAGAAAGACAAAACCGAGCGGC/AGAGCGGCCGGAAGGC/GAGCGGC   | N    |
| 7*Chr1_19b_ISBm7*Chr1_139a_ISBma2_A   | R   | NCTC_10247  | 7  | 2193940-2195512 | Chr1 | ISBma2 | GCCCTC/CAGATTGCTGACAAAC ATGCTGAAGACGCCATG(TCCAGAAAGACAAAACCGAGCGG/AGCCCGCGCGATGGC/AGCGGAG    | N    |
| 10*Chr1_13a_ISBm10*Chr1_32b_ISBma2_A  | R   | PRL20       | 10 | 219786-221358   | Chr1 | ISBma2 | GCGAC CAGATTGCTGACAAAC ATGCTGAAGACGCCATG(TCCAGAAAGACAAAACCGAAGCGGC/AGCCCGTGGGGCGTGGCGGC      | N    |
| 9*Chr1_105a_ISBm9*Chr1_107a_ISBma2_A  | R   | SAVP1       | 9  | 2203072-2204644 | Chr1 | ISBma2 | TCCGG CAGATTGCTGACAAAC ATGCTGAAGACGCCATG(TCCAGAAAGACAAAACCGAAGCCCT(CCCGCTGGTTTCAGCGC/AAGCCCT | N    |
| 8*Chr1_130_ISBma2_B                   | N   | 2002721280  | 8  | 2203726-2205299 | Chr1 | ISBma2 | GTCCA/CAGATTGCTGACAAAC ATGCTGAAGACGCCATG(TCCAGAAAGACAAAACCGAGCGAT/AGGCGATGCGCGCAG/AGCGGAT    | Y    |
| 2*Chr1_46a_ISBma2_A                   | N   | fmh         | 2  | 2204119-2205691 | Chr1 | ISBma2 | AATAC/CAGATTGCTGACAAAC ATGCTGAAGACGCCATG(TCCAGAAAGACAAAACCGAAAAGC/AAAAGCGCGCCCTAGG AAAAGCG   | Y    |
| 9*Chr1_105b_ISBm9*Chr1_107b_ISBma2_A  | R   | SAVP1       | 9  | 2207123-2208695 | Chr1 | ISBma2 | AACGA CAGATTGCTGACAAAC ATGCTGAAGACGCCATG(TCCAGAAAGACAAAACCGAAGCCCT(CCCGCTGGTTTCAGCGC/AAGCCCT | N    |
| 6*Chr1_13b_ISBm6*Chr1_32a_ISBma2_A    | R   | NCTC_10229  | 6  | 2207258-2208830 | Chr1 | ISBma2 | TGTGT/CAGATTGCTGACAAAC ATGCTGAAGACGCCATG(TCCAGAAAGACAAAACCGAAGCG/AGAGCGGGCCGGAAGGC/CAAGCGA   | N    |
| 9*Chr1_23a_ISBma2_A                   | N   | SAVP1       | 9  | 221439-223010   | Chr1 | ISBma2 | CGCG CAGATTGCTGACAAAC ATGCTGAAGACGCCATG(TCCAGAAAGACAAAACCGACCGAG/ACCGCAGCAGGAGGCTG/ACCGCAG   | Y    |
| 3*Chr1_46a_ISBma2_A                   | N   | JHU         | 3  | 2219579-2221151 | Chr1 | ISBma2 | AATAC/CAGATTGCTGACAAAC ATGCTGAAGACGCCATG(TCCAGAAAGACAAAACCGAAAAGC/AAAAGCGCGCCCTAGG AAAAGCG   | Y    |

|                                       |     |             |    |                 |      |        |                                                                                          |      |
|---------------------------------------|-----|-------------|----|-----------------|------|--------|------------------------------------------------------------------------------------------|------|
| 9*Chr1_108_ISBma2_A                   | N   | SAVP1       | 9  | 2238551-2240122 | Chr1 | ISBma2 | CGTGG CAGATTGCTGACAAAC ATGCTGAAGACGCCATG(TCCAGAAAGACAAAACCGGGCGCGGGGCGCTTCGGCGCCGGGGCGC  | Y    |
| 9*Chr1_109_ISBma2_B                   | N   | SAVP1       | 9  | 2242987-2244559 | Chr1 | ISBma2 | AGGCA CAGATTGCTGACAAAC ATGCTGAAGACGCCATG(TCCAGAAAGACAAAACCGGACGGC GGACGGCGGGACGCCGGACGGC | Y    |
| 2*Chr1_41_ISBma2_A                    | N   | fmh         | 2  | 2248201-2249090 | Chr1 | ISBma2 | AATCA(CAGATTGCTGACAAAC ATGCTGAAGACGCCATG(#IS407A CCCTCCACTGGAGGGC #IS407A                | N.D. |
| 2*Chr1_39b_ISBme2*Chr1_44b_ISBma2_A   | R   | fmh         | 2  | 2254925-2256496 | Chr1 | ISBma2 | GCAGG CAGATTGCTGACAAAC ATGCTGAAGACGCCATG(TCCAGAAAGACAAAACCGGGCGCTTCGGCGCCGGGGCG          | N    |
| 7*Chr1_22a_ISBma2_A                   | R   | NCTC_10247  | 7  | 2262477-2264039 | Chr1 | ISBma2 | ~~~~~AGGGGGCAGGTCAAAT ATGCTGAAGACGCCATG(TCCAGAAAGACAAAACCGGGCGCAGCCATTGGCCCTATAGCCCGC    | N    |
| 3*Chr1_41_ISBma2_A                    | N   | JHU         | 3  | 2263558-2264447 | Chr1 | ISBma2 | AATCA(CAGATTGCTGACAAAC ATGCTGAAGACGCCATG(#IS407A CCCTCCACTGGAGGGC #IS407A                | N.D. |
| 9*Chr1_110_ISBma2_A                   | N   | SAVP1       | 9  | 2263757-2265208 | Chr1 | ISBma2 | #IS407A~~~~~TCCAGAAAGACAAAACCGGGCGCAGCCCT(#IS407A AAGCCCTC                               | N    |
| 8*Chr1_46a_ISBma2_A                   | N   | 2002721280  | 8  | 2267980-2269552 | Chr1 | ISBma2 | GGAAA CAGATTGCTGACAAAC ATGCTGAAGACGCCATG(TCCAGAAAGACAAAACCGGGCGCAGCCCTAGG AAAAGCG        | Y    |
| 3*Chr1_39b_ISBme3*Chr1_44b_ISBma2_A   | R   | JHU         | 3  | 2270282-2271853 | Chr1 | ISBma2 | GCAGG CAGATTGCTGACAAAC ATGCTGAAGACGCCATG(TCCAGAAAGACAAAACCGGGCGCAGCCCTAGG AAAAGCG        | N    |
| 9*Chr1_52_ISBma2_A                    | N   | SAVP1       | 9  | 2285906-2287478 | Chr1 | ISBma2 | CCGGA CAGATTGCTGACAAAC ATGCTGAAGACGCCATG(TCCAGAAAGACAAAACCGGGCGCAGCCCTAGG AAAAGCG        | Y    |
| 10*Chr1_39a_ISBm10*Chr1_44a_ISBma2_A  | R   | PRL20       | 10 | 2287844-2289416 | Chr1 | ISBma2 | ACGGC CAGATTGCTGACAAAC ATGCTGAAGACGCCATG(TCCAGAAAGACAAAACCGGGCGCAGCCCTAGG AAAAGCG        | N    |
| 4*Chr1_46a_ISBma2_A                   | N   | gb8_horse_4 | 4  | 2299455-2301027 | Chr1 | ISBma2 | AATAC(CAGATTGCTGACAAAC ATGCTGAAGACGCCATG(TCCAGAAAGACAAAACCGGGCGCAGCCCTAGG AAAAGCG        | Y    |
| 1*Chr1_46a_ISBma2_A                   | N   | ATCC_23344  | 1  | 2311360-2312932 | Chr1 | ISBma2 | AATAC(CAGATTGCTGACAAAC ATGCTGAAGACGCCATG(TCCAGAAAGACAAAACCGGGCGCAGCCCTAGG AAAAGCG        | Y    |
| 8*Chr1_41_ISBma2_A                    | N   | 2002721280  | 8  | 2311719-2312608 | Chr1 | ISBma2 | AATCA(CAGATTGCTGACAAAC ATGCTGAAGACGCCATG(#IS407A CCCTCCACTGGAGGGC #IS407A                | N.D. |
| 10*Chr1_41_ISBma2_A                   | N   | PRL20       | 10 | 2315851-2316740 | Chr1 | ISBma2 | AATCA(CAGATTGCTGACAAAC ATGCTGAAGACGCCATG(#IS407A CCCTCCACTGGAGGGC #IS407A                | N.D. |
| 8*Chr1_39b_ISBme8*Chr1_44b_ISBma2_A   | R   | 2002721280  | 8  | 2318443-2320015 | Chr1 | ISBma2 | GCAGG CAGATTGCTGACAAAC ATGCTGAAGACGCCATG(TCCAGAAAGACAAAACCGGGCGCAGCCCTAGG AAAAGCG        | N    |
| 6*Chr1_13a_ISBma6*Chr1_32b_ISBma2_A   | R   | NCTC_10229  | 6  | 2330494-2332086 | Chr1 | ISBma2 | GCGAC CAGATTGCTGACAAAC ATGCTGAAGACGCCATG(TCCAGAAAGACAAAACCGGGCGCAGCCCTAGG AAAAGCG        | N    |
| 2*Chr1_139a_ISBm2*Chr1_141a_ISBma2_A  | R   | fmh         | 2  | 2335759-2337331 | Chr1 | ISBma2 | CCCTC(CAGATTGCTGACAAAC ATGCTGAAGACGCCATG(TCCAGAAAGACAAAACCGGGCGCAGCCCTAGG AAAAGCG        | N    |
| 7*Chr1_13a_ISBma7*Chr1_32b_ISBma2_A   | R   | NCTC_10247  | 7  | 2338546-2340123 | Chr1 | ISBma2 | GCGAC CAGATTGCTGACAAAC ATGCTGAAGACGCCATG(TCCAGAAAGACAAAACCGGGCGCAGCCCTAGG AAAAGCG        | N    |
| 9*Chr1_50_ISBma2_A                    | N   | SAVP1       | 9  | 2340294-2341866 | Chr1 | ISBma2 | AGGCA CAGATTGCTGACAAAC ATGCTGAAGACGCCATG(TCCAGAAAGACAAAACCGGGCGCAGCCCTAGG AAAAGCG        | Y    |
| 4*Chr1_41_ISBma2_A                    | N   | gb8_horse_4 | 4  | 2343434-2344323 | Chr1 | ISBma2 | AATCA(CAGATTGCTGACAAAC ATGCTGAAGACGCCATG(#IS407A CCCTCCACTGGAGGGC #IS407A                | N.D. |
| 10*Chr1_39b_ISBm10*Chr1_44b_ISBma2_A  | R   | PRL20       | 10 | 2344825-2346397 | Chr1 | ISBma2 | GCAGG CAGATTGCTGACAAAC ATGCTGAAGACGCCATG(TCCAGAAAGACAAAACCGGGCGCAGCCCTAGG AAAAGCG        | N    |
| 7*Chr1_118_ISBma2_A                   | N   | NCTC_10247  | 7  | 2345666-2361338 | Chr1 | ISBma2 | CGATC(CAGATTGCTGACAAAC ATGCTGAAGACGCCATG(TCCAGAAAGACAAAACCGGGCGCAGCCCTAGG AAAAGCG        | Y    |
| 4*Chr1_39b_ISBme4*Chr1_44b_ISBma2_A   | R   | gb8_horse_4 | 4  | 2350107-2351678 | Chr1 | ISBma2 | GCAGG CAGATTGCTGACAAAC ATGCTGAAGACGCCATG(TCCAGAAAGACAAAACCGGGCGCAGCCCTAGG AAAAGCG        | N    |
| 3*Chr1_139a_ISBm3*Chr1_141a_ISBma2_A  | R   | JHU         | 3  | 2351116-2352688 | Chr1 | ISBma2 | CCCTC(CAGATTGCTGACAAAC ATGCTGAAGACGCCATG(TCCAGAAAGACAAAACCGGGCGCAGCCCTAGG AAAAGCG        | N    |
| 1*Chr1_41_ISBma2_A                    | N   | ATCC_23344  | 1  | 2355339-2356228 | Chr1 | ISBma2 | AATCA(CAGATTGCTGACAAAC ATGCTGAAGACGCCATG(#IS407A CCCTCCACTGGAGGGC #IS407A                | N.D. |
| 2*Chr1_140_ISBma2_B                   | N   | fmh         | 2  | 2357628-2359200 | Chr1 | ISBma2 | GCGCA CAGATTGCTGACAAAC ATGCTGAAGACGCCATG(TCCAGAAAGACAAAACCGGGCGCAGCCCTAGG AAAAGCG        | Y    |
| 1*Chr1_39b_ISBme1*Chr1_44b_ISBma2_A   | R   | ATCC_23344  | 1  | 2362064-2363635 | Chr1 | ISBma2 | GCAGG CAGATTGCTGACAAAC ATGCTGAAGACGCCATG(TCCAGAAAGACAAAACCGGGCGCAGCCCTAGG AAAAGCG        | N    |
| 3*Chr1_140_ISBma2_B                   | N   | JHU         | 3  | 2372985-2374557 | Chr1 | ISBma2 | GCGCA CAGATTGCTGACAAAC ATGCTGAAGACGCCATG(TCCAGAAAGACAAAACCGGGCGCAGCCCTAGG AAAAGCG        | Y    |
| 10*Chr1_46a_ISBma2_A                  | N   | PRL20       | 10 | 2378078-2379650 | Chr1 | ISBma2 | AATAC(CAGATTGCTGACAAAC ATGCTGAAGACGCCATG(TCCAGAAAGACAAAACCGGGCGCAGCCCTAGG AAAAGCG        | Y    |
| 8*Chr1_139a_ISBm8*Chr1_141a_ISBma2_A  | R   | 2002721280  | 8  | 2398395-2399967 | Chr1 | ISBma2 | CCCTC(CAGATTGCTGACAAAC ATGCTGAAGACGCCATG(TCCAGAAAGACAAAACCGGGCGCAGCCCTAGG AAAAGCG        | N    |
| 2*Chr1_139b_ISBm2*Chr1_141b_ISBma2_A  | R   | fmh         | 2  | 2418316-2419888 | Chr1 | ISBma2 | CCTCC(CAGATTGCTGACAAAC ATGCTGAAGACGCCATG(TCCAGAAAGACAAAACCGGGCGCAGCCCTAGG AAAAGCG        | N    |
| 4*Chr1_139a_ISBm4*Chr1_141a_ISBma2_A  | R   | gb8_horse_4 | 4  | 2430897-2432469 | Chr1 | ISBma2 | GCCCT(CAGATTGCTGACAAAC ATGCTGAAGACGCCATG(TCCAGAAAGACAAAACCGGGCGCAGCCCTAGG AAAAGCG        | N    |
| 3*Chr1_139b_ISBm3*Chr1_141b_ISBma2_A  | R   | JHU         | 3  | 2434455-2436027 | Chr1 | ISBma2 | CCTCC(CAGATTGCTGACAAAC ATGCTGAAGACGCCATG(TCCAGAAAGACAAAACCGGGCGCAGCCCTAGG AAAAGCG        | N    |
| 7*Chr1_117a_ISBma2_A                  | N   | NCTC_10247  | 7  | 243623-245215   | Chr1 | ISBma2 | TGCA(CAGATTGCTGACAAAC ATGCTGAAGACGCCATG(TCCAGAAAGACAAAACCGGGCGCAGCCCTAGG AAAAGCG         | N    |
| 1*Chr1_139a_ISBm1*Chr1_141a_ISBma2_A  | R   | ATCC_23344  | 1  | 2442898-2444470 | Chr1 | ISBma2 | GCCCT(CAGATTGCTGACAAAC ATGCTGAAGACGCCATG(TCCAGAAAGACAAAACCGGGCGCAGCCCTAGG AAAAGCG        | N    |
| 4*Chr1_140_ISBma2_B                   | N   | gb8_horse_4 | 4  | 2452766-2454338 | Chr1 | ISBma2 | GCGCA CAGATTGCTGACAAAC ATGCTGAAGACGCCATG(TCCAGAAAGACAAAACCGGGCGCAGCCCTAGG AAAAGCG        | Y    |
| 5*Chr1_46a_ISBma2_A                   | N   | ATCC_10399  | 5  | 2460834-2462406 | Chr1 | ISBma2 | AATAC(CAGATTGCTGACAAAC ATGCTGAAGACGCCATG(TCCAGAAAGACAAAACCGGGCGCAGCCCTAGG AAAAGCG        | Y    |
| 1*Chr1_140_ISBma2_B                   | N   | ATCC_23344  | 1  | 2464767-2466339 | Chr1 | ISBma2 | GCGCA CAGATTGCTGACAAAC ATGCTGAAGACGCCATG(TCCAGAAAGACAAAACCGGGCGCAGCCCTAGG AAAAGCG        | Y    |
| 8*Chr1_139b_ISBm8*Chr1_141b_ISBma2_A  | R   | 2002721280  | 8  | 2478896-2480470 | Chr1 | ISBma2 | CCTCC(CAGATTGCTGACAAAC ATGCTGAAGACGCCATG(TCCAGAAAGACAAAACCGGGCGCAGCCCTAGG AAAAGCG        | N    |
| 10*Chr1_22b_ISBm10*Chr1_141a_ISBma2_A | R   | PRL20       | 10 | 2490911-2492483 | Chr1 | ISBma2 | CGCCG CAGATTGCTGACAAAC ATGCTGAAGACGCCATG(TCCAGAAAGACAAAACCGGGCGCAGCCCTAGG AAAAGCG        | N    |
| 8*Chr1_155_ISBma2_B                   | N   | 2002721280  | 8  | 2494952-2496499 | Chr1 | ISBma2 | ~CTTC(CAGATTGCTGACAAAC ATGCTGAAGACGCCATG(TCCAGAAAGACAAAACCGGGCGCAGCCCTAGG AAAAGCG        | Y    |
| 7*Chr1_32a_ISBma7*Chr1_141a_ISBma2_A  | R   | NCTC_10247  | 7  | 2496018-2497590 | Chr1 | ISBma2 | TGTGT(CAGATTGCTGACAAAC ATGCTGAAGACGCCATG(TCCAGAAAGACAAAACCGGGCGCAGCCCTAGG AAAAGCG        | N    |
| 5*Chr1_41_ISBma2_A                    | N   | ATCC_10399  | 5  | 2504830-2505719 | Chr1 | ISBma2 | AATCA(CAGATTGCTGACAAAC ATGCTGAAGACGCCATG(#IS407A CCCTCCACTGGAGGGC #IS407A                | N.D. |
| 9*Chr1_117a_ISBma2_A                  | N   | SAVP1       | 9  | 2505752-2507325 | Chr1 | ISBma2 | TTTTG CAGATTGCTGACAAAC ATGCTGAAGACGCCATG(TCCAGAAAGACAAAACCGGGCGCAGCCCTAGG AAAAGCG        | N    |
| 5*Chr1_39b_ISBme5*Chr1_44b_ISBma2_A   | R   | ATCC_10399  | 5  | 2511431-2513003 | Chr1 | ISBma2 | GCAGG CAGATTGCTGACAAAC ATGCTGAAGACGCCATG(TCCAGAAAGACAAAACCGGGCGCAGCCCTAGG AAAAGCG        | N    |
| 4*Chr1_139b_ISBm4*Chr1_141b_ISBma2_A  | R   | gb8_horse_4 | 4  | 2513056-2514628 | Chr1 | ISBma2 | CCTCC(CAGATTGCTGACAAAC ATGCTGAAGACGCCATG(TCCAGAAAGACAAAACCGGGCGCAGCCCTAGG AAAAGCG        | N    |
| 9*Chr1_118_ISBma2_A                   | N   | SAVP1       | 9  | 2514844-2516416 | Chr1 | ISBma2 | CGATC(CAGATTGCTGACAAAC ATGCTGAAGACGCCATG(TCCAGAAAGACAAAACCGGGCGCAGCCCTAGG AAAAGCG        | Y    |
| 1*Chr1_139b_ISBm1*Chr1_141b_ISBma2_A  | R   | ATCC_23344  | 1  | 2525029-2526601 | Chr1 | ISBma2 | CCTCC(CAGATTGCTGACAAAC ATGCTGAAGACGCCATG(TCCAGAAAGACAAAACCGGGCGCAGCCCTAGG AAAAGCG        | N    |
| 9*Chr1_22b_ISBme9*Chr1_141a_ISBma2_A  | R   | SAVP1       | 9  | 254941-256513   | Chr1 | ISBma2 | GCCG CAGATTGCTGACAAAC ATGCTGAAGACGCCATG(TCCAGAAAGACAAAACCGGGCGCAGCCCTAGG AAAAGCG         | N    |
| 9*Chr1_120_ISBma2_A                   | N   | SAVP1       | 9  | 2551397-2552969 | Chr1 | ISBma2 | AGGCA CAGATTGCTGACAAAC ATGCTGAAGACGCCATG(TCCAGAAAGACAAAACCGGGCGCAGCCCTAGG AAAAGCG        | Y    |
| 6*Chr1_39a_ISBma6*Chr1_46b_ISBma2_A   | R   | NCTC_10229  | 6  | 2558075-2559647 | Chr1 | ISBma2 | GGAAA CAGATTGCTGACAAAC ATGCTGAAGACGCCATG(TCCAGAAAGACAAAACCGGGCGCAGCCCTAGG AAAAGCG        | N    |
| 2*Chr1_147_ISBma2_A                   | D-R | fmh         | 2  | 2563010-2564573 | Chr1 | ISBma2 | ~~~~~AGGGGGCAGGTCAAAT ATGCTGAAGACGCCATG(TCCAGAAAGACAAAACCGGGCGCAGCCCTAGG AAAAGCG         | N    |
| 8*Chr1_151b_ISBm8*Chr1_159b_ISBma2_A  | R   | 2002721280  | 8  | 2565718-2567265 | Chr1 | ISBma2 | ~~~~~NNNNNNNNNNNNNNI ATGCTGAAGACGCCATG(TCCAGAAAGACAAAACCGGGCGCAGCCCTAGG AAAAGCG          | N.D. |
| 9*Chr1_121_ISBma2_A                   | N   | SAVP1       | 9  | 2567125-2567395 | Chr1 | ISBma2 | #IS407A~~~~~TCCAGAAAGACAAAACCGGGCGCAGCCCTAGG AAAAGCG                                     | N.D. |
| 10*Chr1_139b_ISB10*Chr1_141b_ISBma2_A | R   | PRL20       | 10 | 2571166-2572738 | Chr1 | ISBma2 | CCTCC(CAGATTGCTGACAAAC ATGCTGAAGACGCCATG(TCCAGAAAGACAAAACCGGGCGCAGCCCTAGG AAAAGCG        | N    |
| 7*Chr1_139b_ISBm7*Chr1_141b_ISBma2_A  | R   | NCTC_10247  | 7  | 2576418-2577992 | Chr1 | ISBma2 | CCTCC(CAGATTGCTGACAAAC ATGCTGAAGACGCCATG(TCCAGAAAGACAAAACCGGGCGCAGCCCTAGG AAAAGCG        | N    |
| 3*Chr1_147_ISBma2_A                   | D-R | JHU         | 3  | 2579658-2581221 | Chr1 | ISBma2 | ~~~~~AGGGGGCAGGTCAAAT ATGCTGAAGACGCCATG(TCCAGAAAGACAAAACCGGGCGCAGCCCTAGG AAAAGCG         | N    |



|                                       |     |             |    |                 |      |        |                                                                                             |      |
|---------------------------------------|-----|-------------|----|-----------------|------|--------|---------------------------------------------------------------------------------------------|------|
| 5*Chr1_139a_ISBm5*Chr1_141a_ISBma2_A  | R   | ATCC_10399  | 5  | 2593046-2594618 | Chr1 | ISBma2 | GCCCTCAGATTGCTGACAAACATGCTGAAGACGCCATGCTCCAGAAAGACAAAACCCAGCCCGA/CCGGCGCATGGCCGGAGCCCGA     | N    |
| 5*Chr1_140_ISBma2_B                   | N   | ATCC_10399  | 5  | 2614915-2616487 | Chr1 | ISBma2 | GCGCA CAGATTGCTGACAAACATGCTGAAGACGCCATGCTCCAGAAAGACAAAACCCAGCCCCC(ACGCCCCGGCCGGGGCAGCCCCC   | Y    |
| 9*Chr1_46a_ISBma2_A                   | N   | SAVP1       | 9  | 2618874-2620446 | Chr1 | ISBma2 | AATAC CAGATTGCTGACAAACATGCTGAAGACGCCATGCTCCAGAAAGACAAAACCCAAAAGCG/AAAAGCGCCCTAGGAAAAGCG     | Y    |
| 7*Chr1_1b_ISBma2*7*Chr1_19a_ISBma2_A  | R   | NCTC_10247  | 7  | 2622004-2623575 | Chr1 | ISBma2 | GCACG CAGATTGCTGACAAACATGCTGAAGACGCCATGCTCCAGAAAGACAAAACCCAACCCGCI/GAGGGCGTCGCCCTCCACCCG    | N    |
| 6*Chr1_130_ISBma2_B                   | N   | NCTC_10229  | 6  | 2622284-2623857 | Chr1 | ISBma2 | GTCAC CAGATTGCTGACAAACATGCTGAAGACGCCATGCTCCAGAAAGACAAAACCCAGGCGAT/GCCGCGCAGCGAGCGGAT        | Y    |
| 8*Chr1_148_ISBma8*Chr1_159a_ISBma2_A  | D-R | 2002721280  | 8  | 2648477-2650049 | Chr1 | ISBma2 | GGATT CAGATTGCTGACAAACATGCTGAAGACGCCATGCTCCAGAAAGACAAAACCCAGGCCCI/AGGGCCGATGAAGCAGAGGCCCI   | N    |
| 4*Chr1_147_ISBma2_A                   | D-R | gb8_horse_4 | 4  | 2657553-2659116 | Chr1 | ISBma2 | ~~~~~AGGGGGCAGGTCAA/ATGCTGAAGACGCCATGCTCCAGAAAGACAAAACCCAGGCCCI/AAGCCATTGGCCCTA/AGGGCC      | N    |
| 1*Chr1_147_ISBma2_A                   | D-R | ATCC_23344  | 1  | 2669533-2671096 | Chr1 | ISBma2 | ~~~~~AGGGGGCAGGTCAA/ATGCTGAAGACGCCATGCTCCAGAAAGACAAAACCCAGGCCCI/AGGCCATTGGCCCTA/AGGGCC      | N    |
| 5*Chr1_139b_ISBm5*Chr1_141b_ISBma2_A  | R   | ATCC_10399  | 5  | 2675065-2676637 | Chr1 | ISBma2 | CCTCC CAGATTGCTGACAAACATGCTGAAGACGCCATGCTCCAGAAAGACAAAACCCAGCCCGI/CCGAACACAGCGTTG/AGCCCG    | N    |
| 10*Chr1_139a_ISB10*Chr1_147_ISBma2_A  | D-R | PRL20       | 10 | 2714631-2716203 | Chr1 | ISBma2 | GCCCTCAGATTGCTGACAAACATGCTGAAGACGCCATGCTCCAGAAAGACAAAACCCAGGCCCI/CCGGCGCATGGCCGGAGCCG       | N    |
| 10*Chr1_138_ISBma2_C                  | N   | PRL20       | 10 | 2727692-2728537 | Chr1 | ISBma2 | ~~~~~AGGGGGCAGGTCAA/ATGCTGAAGACGCCATGCTCCAGAAAGACAAAACCCAGGCCCI/AGGCCATTGGCCCTA/AGGGCC      | N.D. |
| 2*Chr1_151a_ISBma2_A                  | N   | fmh         | 2  | 2742888-2744460 | Chr1 | ISBma2 | AGCCG CAGATTGCTGACAAACATGCTGAAGACGCCATGCTCCAGAAAGACAAAACCCAGCCCG/ AAGCGCCTTTCGGCC(AGCCCG    | N    |
| 8*Chr1_151a_ISBma2_A                  | R   | 2002721280  | 8  | 2747570-2749142 | Chr1 | ISBma2 | ATTTCC CAGATTGCTGACAAACATGCTGAAGACGCCATGCTCCAGAAAGACAAAACCCAACCCGCI/GCCCGCTTCGGCGG AACC     | N    |
| 7*Chr1_23b_ISBm7*Chr1_151a_ISBma2_A   | R   | NCTC_10247  | 7  | 2756502-2758099 | Chr1 | ISBma2 | CGCGC CAGATTGCTGACAAACATGCTGAAGACGCCATGCTCCAGAAAGACAAAACCCAACCCGCI/ACCAGCGAAGGCTGACCCG      | N    |
| 3*Chr1_151a_ISBma2_A                  | N   | JHU         | 3  | 2758991-2760563 | Chr1 | ISBma2 | AGCCG CAGATTGCTGACAAACATGCTGAAGACGCCATGCTCCAGAAAGACAAAACCCAGCCCG/ AAGCGCCTTTCGGCC(AGCCCG    | N    |
| 9*Chr1_13a_ISBma9*Chr1_32b_ISBma2_A   | R   | SAVP1       | 9  | 2763087-2764659 | Chr1 | ISBma2 | GCGAC CAGATTGCTGACAAACATGCTGAAGACGCCATGCTCCAGAAAGACAAAACCCGAGCGG/ GACCCGCTGGCCGGT/ GAGCGG   | N    |
| 2*Chr1_1b_ISBma2_A                    | R   | fmh         | 2  | 2776259-2777831 | Chr1 | ISBma2 | ATTTCC CAGATTGCTGACAAACATGCTGAAGACGCCATGCTCCAGAAAGACAAAACCCAACCCGCI/GCCCGCTTCGGCGG AACC     | N    |
| 7*Chr1_24_ISBma2_A                    | N   | NCTC_10247  | 7  | 2784533-2786105 | Chr1 | ISBma2 | GGCAA CAGATTGCTGACAAACATGCTGAAGACGCCATGCTCCAGAAAGACAAAACCCAACCCGCI/AGCCGCTTCGGCGG AACC      | Y    |
| 2*Chr1_148_ISBma2*Chr1_159a_ISBma2_A  | D-R | fmh         | 2  | 2784984-2786556 | Chr1 | ISBma2 | GGATT CAGATTGCTGACAAACATGCTGAAGACGCCATGCTCCAGAAAGACAAAACCCAGGCCCI/AGGGCCGATGAAGCAGAGGCC     | N    |
| 8*Chr1_3_ISBma2_C                     | N   | 2002721280  | 8  | 2785321-2786893 | Chr1 | ISBma2 | AAAGC CAGATTGCTGACAAACATGCTGAAGACGCCATGCTCCAGAAAGACAAAACCCAGCCCGI/AGCCGCGATGAGCCG AACC      | Y    |
| 3*Chr1_1b_ISBma2_A                    | R   | JHU         | 3  | 2791386-2792958 | Chr1 | ISBma2 | ATTTCC CAGATTGCTGACAAACATGCTGAAGACGCCATGCTCCAGAAAGACAAAACCCAACCCGCI/GCCCGCTTCGGCGG AACC     | N    |
| 2*Chr1_39a_ISBma2*Chr1_117b_ISBma2_A  | R   | fmh         | 2  | 279549-281121   | Chr1 | ISBma2 | TTTCG CAGATTGCTGACAAACATGCTGAAGACGCCATGCTCCAGAAAGACAAAACCCAAGCCCT( AACC                     | N    |
| 3*Chr1_148_ISBma3*Chr1_159a_ISBma2_A  | D-R | JHU         | 3  | 2800111-2801683 | Chr1 | ISBma2 | GGATT CAGATTGCTGACAAACATGCTGAAGACGCCATGCTCCAGAAAGACAAAACCCAGGCCCI/AGGGCCGATGAAGCAGAGGCC     | N    |
| 3*Chr1_39a_ISBma3*Chr1_117b_ISBma2_A  | R   | JHU         | 3  | 280544-282116   | Chr1 | ISBma2 | TTTCG CAGATTGCTGACAAACATGCTGAAGACGCCATGCTCCAGAAAGACAAAACCCAAGCCCT( AACC                     | N    |
| 8*Chr1_39a_ISBma8*Chr1_117b_ISBma2_A  | R   | 2002721280  | 8  | 280947-282519   | Chr1 | ISBma2 | TTGAC CAGATTGCTGACAAACATGCTGAAGACGCCATGCTCCAGAAAGACAAAACCCAGCCCT/ CACCGCTGTTTCAGCG AACC     | N    |
| 7*Chr1_25a_ISBma7*Chr1_28a_ISBma2_A   | R   | NCTC_10247  | 7  | 2814990-2816561 | Chr1 | ISBma2 | TCGAA CAGATTGCTGACAAACATGCTGAAGACGCCATGCTCCAGAAAGACAAAACCCAGCCCG/ CCGCGCTTCGGCGG AACC       | N    |
| 5*Chr1_147_ISBma2_A                   | D-R | ATCC_10399  | 5  | 2818680-2820243 | Chr1 | ISBma2 | ~~~~~AGGGGGCAGGTCAA/ATGCTGAAGACGCCATGCTCCAGAAAGACAAAACCCAGGCCCI/AGGCCATTGGCCCTA/AGGGCC      | N    |
| 8*Chr1_1a_ISBma2_A                    | N   | 2002721280  | 8  | 2824135-2825706 | Chr1 | ISBma2 | AGCTG CAGATTGCTGACAAACATGCTGAAGACGCCATGCTCCAGAAAGACAAAACCCAACCCGCI/CCGCTGTTTCAGCGG AACC     | N    |
| 4*Chr1_151a_ISBma2_A                  | N   | gb8_horse_4 | 4  | 2834020-2835592 | Chr1 | ISBma2 | AGCCG CAGATTGCTGACAAACATGCTGAAGACGCCATGCTCCAGAAAGACAAAACCCAGCCCG/ AAGCGCCTTTCGGCC(AGCCCG    | N    |
| 1*Chr1_151a_ISBma2_A                  | N   | ATCC_23344  | 1  | 2847519-2849091 | Chr1 | ISBma2 | AGCCG CAGATTGCTGACAAACATGCTGAAGACGCCATGCTCCAGAAAGACAAAACCCAGCCCG/ AAGCGCCTTTCGGCC(AGCCCG    | N    |
| 4*Chr1_1b_ISBma2_A                    | R   | gb8_horse_4 | 4  | 2866443-2868015 | Chr1 | ISBma2 | ATTTCC CAGATTGCTGACAAACATGCTGAAGACGCCATGCTCCAGAAAGACAAAACCCAACCCGCI/GCCCGCTTCGGCGG AACC     | N    |
| 7*Chr1_25b_ISBm7*Chr1_28b_ISBma2_A    | R   | NCTC_10247  | 7  | 2867420-2868994 | Chr1 | ISBma2 | CGCCG CAGATTGCTGACAAACATGCTGAAGACGCCATGCTCCAGAAAGACAAAACCCAGGCCCI/CTGTCGAGGACGGG AAGCCG     | N    |
| 8*Chr1_164_ISBma2_B                   | N   | 2002721280  | 8  | 2872259-2873831 | Chr1 | ISBma2 | ATGCC CAGATTGCTGACAAACATGCTGAAGACGCCATGCTCCAGAAAGACAAAACCCAGGCAG/AGGCAGCCGAGGGG AAGCAG      | Y    |
| 4*Chr1_148_ISBma4*Chr1_159a_ISBma2_A  | D-R | gb8_horse_4 | 4  | 2875168-2876717 | Chr1 | ISBma2 | GGATT CAGATTGCTGACAAACATGCTGAAGACGCCATGCTCCAGAAAGACAAAACCCAGGCCCI/AGGGCCGATGAAGCAGAGGCC     | N    |
| 1*Chr1_1b_ISBma2_A                    | R   | ATCC_23344  | 1  | 2879914-2881486 | Chr1 | ISBma2 | ATTTCC CAGATTGCTGACAAACATGCTGAAGACGCCATGCTCCAGAAAGACAAAACCCAACCCGCI/GCCCGCTTCGGCGG AACC     | N    |
| 9*Chr1_13b_ISBm9*Chr1_32a_ISBma2_A    | R   | SAVP1       | 9  | 2884897-2886468 | Chr1 | ISBma2 | TGTGT CAGATTGCTGACAAACATGCTGAAGACGCCATGCTCCAGAAAGACAAAACCCAACGGAC/AGAGGGCCCGAAGGCAACGGA     | N    |
| 2*Chr1_118_ISBma2_A                   | N   | fmh         | 2  | 288595-290167   | Chr1 | ISBma2 | CGATC CAGATTGCTGACAAACATGCTGAAGACGCCATGCTCCAGAAAGACAAAACCCAAGCGCI/ AAGCGCCCGGGCAAC AAGCGC   | Y    |
| 1*Chr1_148_ISBma1*Chr1_159a_ISBma2_A  | D-R | ATCC_23344  | 1  | 2888639-2890211 | Chr1 | ISBma2 | GGATT CAGATTGCTGACAAACATGCTGAAGACGCCATGCTCCAGAAAGACAAAACCCAGGCCCI/AGGGCCGATGAAGCG AAGCC     | N    |
| 10*Chr1_151a_ISBma2_A                 | N   | PRL20       | 10 | 2889009-2890581 | Chr1 | ISBma2 | AGCCG CAGATTGCTGACAAACATGCTGAAGACGCCATGCTCCAGAAAGACAAAACCCAACCCGCI/ AAGCGCCTTTCGGCC( AACC   | N    |
| 10*Chr1_1b_ISBma2_A                   | R   | PRL20       | 10 | 2896600-2898131 | Chr1 | ISBma2 | #IS407/~~~~~GGTCAGAAGCGCCATGCTCCAGAAAGACAAAACCCAACCCGCI/ AACC                               | N.D. |
| 2*Chr1_1a_ISBma2*2*Chr1_159b_ISBma2_A | R   | fmh         | 2  | 2900149-2901721 | Chr1 | ISBma2 | AGCTG CAGATTGCTGACAAACATGCTGAAGACGCCATGCTCCAGAAAGACAAAACCCGGGCGC/ CCGCTGTTTCAGCGG GGGCGC    | N    |
| 8*Chr1_118_ISBma2_A                   | N   | 2002721280  | 8  | 290022-291594   | Chr1 | ISBma2 | CGATC CAGATTGCTGACAAACATGCTGAAGACGCCATGCTCCAGAAAGACAAAACCCAAGCGCI/ AAGCGCCCGGGCAAC AAGCGC   | Y    |
| 3*Chr1_118_ISBma2_A                   | N   | JHU         | 3  | 290199-291771   | Chr1 | ISBma2 | CGATC CAGATTGCTGACAAACATGCTGAAGACGCCATGCTCCAGAAAGACAAAACCCAAGCGCI/ AAGCGCCCGGGCAAC AAGCGC   | Y    |
| 10*Chr1_148_ISBm10*Chr1_159a_ISBma2_A | D-R | PRL20       | 10 | 2904760-2906332 | Chr1 | ISBma2 | GGATT CAGATTGCTGACAAACATGCTGAAGACGCCATGCTCCAGAAAGACAAAACCCAGGCCCI/AGGGCCGATGAAGCAGAGGCC     | N    |
| 8*Chr1_163_ISBma2_A                   | N   | 2002721280  | 8  | 2905615-2907162 | Chr1 | ISBma2 | ~~~~~CAGATTGCTGACAAACATGCTGAAGACGCCATGCTCCAGAAAGACAAAACCCTGCTCGCTTCGGGAAGCGGAG TGCTCG       | Y    |
| 5*Chr1_151a_ISBma2_A                  | N   | ATCC_10399  | 5  | 2907488-2909060 | Chr1 | ISBma2 | AGCCG CAGATTGCTGACAAACATGCTGAAGACGCCATGCTCCAGAAAGACAAAACCCAGCCCG/ AAGCGCCTTTCGGCC(AGCCCG    | N    |
| 3*Chr1_1a_ISBma2*3*Chr1_159b_ISBma2_A | R   | JHU         | 3  | 2915891-2917463 | Chr1 | ISBma2 | AGCTG CAGATTGCTGACAAACATGCTGAAGACGCCATGCTCCAGAAAGACAAAACCCGGGCGC/ CCGCTGTTTCAGCG( GGGCGC    | N    |
| 7*Chr1_1a_ISBma2*7*Chr1_159b_ISBma2_A | R   | NCTC_10247  | 7  | 2928340-2929912 | Chr1 | ISBma2 | AGCTG CAGATTGCTGACAAACATGCTGAAGACGCCATGCTCCAGAAAGACAAAACCCAGGCCCI/ CCGCTGTTTCAGCGG AAGCGC   | N    |
| 9*Chr1_17_ISBma2_C                    | N   | SAVP1       | 9  | 2957135-2958707 | Chr1 | ISBma2 | TGAGC CAGATTGCTGACAAACATGCTGAAGACGCCATGCTCCAGAAAGACAAAACCCAAGCGCI/ AAGCGCCTTCGGCGC AAGCGC   | Y    |
| 6*Chr1_50_ISBma2_A                    | N   | NCTC_10229  | 6  | 2971768-2973340 | Chr1 | ISBma2 | GCGAC CAGATTGCTGACAAACATGCTGAAGACGCCATGCTCCAGAAAGACAAAACCCGGGCGC/ GGGCGCGACGTACT GGGCGC     | Y    |
| 7*Chr1_164_ISBma2_B                   | N   | NCTC_10247  | 7  | 2976463-2978010 | Chr1 | ISBma2 | ~~~~~CAGATTGCTGACAAACATGCTGAAGACGCCATGCTCCAGAAAGACAAAACCCAGCAGCI/AGCAGCCGAGGGAGC AAGCG      | Y    |
| 2*Chr1_163_ISBma2_A                   | N   | fmh         | 2  | 2979940-2981512 | Chr1 | ISBma2 | CGCTT CAGATTGCTGACAAACATGCTGAAGACGCCATGCTCCAGAAAGACAAAACCCTGCTCGCT/ TGCTCGGAAGGGCGAG TGCTCG | Y    |
| 8*Chr1_25b_ISBm8*Chr1_28b_ISBma2_A    | R   | 2002721280  | 8  | 2983988-2985560 | Chr1 | ISBma2 | CGCCG CAGATTGCTGACAAACATGCTGAAGACGCCATGCTCCAGAAAGACAAAACCCAGGCCCI/CTGTCGAGGACGGG AAGCCG     | N    |
| 4*Chr1_1a_ISBma2*4*Chr1_159b_ISBma2_A | R   | gb8_horse_4 | 4  | 2988475-2990047 | Chr1 | ISBma2 | AGCTG CAGATTGCTGACAAACATGCTGAAGACGCCATGCTCCAGAAAGACAAAACCCGGGCGC/ CCGCTGTTTCAGCG( GGGCGC    | N    |
| 3*Chr1_163_ISBma2_A                   | N   | JHU         | 3  | 2996311-2997883 | Chr1 | ISBma2 | CGCTT CAGATTGCTGACAAACATGCTGAAGACGCCATGCTCCAGAAAGACAAAACCCTGCTCGCT/ TGCTCGGAAGGGCGAG TGCTCG | Y    |
| 1*Chr1_1a_ISBma2*1*Chr1_159b_ISBma2_A | R   | ATCC_23344  | 1  | 3002230-3003802 | Chr1 | ISBma2 | AGCTG CAGATTGCTGACAAACATGCTGAAGACGCCATGCTCCAGAAAGACAAAACCCGGGCGC/ CCGCTGTTTCAGCG( GGGCGC    | N    |
| 9*Chr1_19a_ISBma2_A                   | N   | SAVP1       | 9  | 3005415-3006987 | Chr1 | ISBma2 | GCACG CAGATTGCTGACAAACATGCTGAAGACGCCATGCTCCAGAAAGACAAAACCCAGCGGAG/ AGCGGAGGGCGTCCG AAGCGG   | Y    |
| 7*Chr1_163_ISBma2_A                   | N   | NCTC_10247  | 7  | 3009753-3011300 | Chr1 | ISBma2 | ~~~~~CAGATTGCTGACAAACATGCTGAAGACGCCATGCTCCAGAAAGACAAAACCCTGCTCGCT/ TGCTCGGAAGGGCGAG TGCTCG  | Y    |

|                                       |     |             |    |                 |      |        |                                                                                                |   |
|---------------------------------------|-----|-------------|----|-----------------|------|--------|------------------------------------------------------------------------------------------------|---|
| 6*Chr1_52_ISBma2_A                    | N   | NCTC_10229  | 6  | 3026236-3027808 | Chr1 | ISBma2 | CCGGA CAGATTGCTGACAAAC ATGCTGAAGACGCCATG(TCCAGAAAGACAAAACCC ACGCCGGIACGGCCGCGTCAACG ACGGCCG    | Y |
| 5*Chr1_1b_ISBma2_A                    | R   | ATCC_10399  | 5  | 3029164-3030736 | Chr1 | ISBma2 | ATTTC CAGATTGCTGACAAAC ATGCTGAAGACGCCATG(TCCAGAAAGACAAAACCC AACCCCGIACGCCCGCTTCGGCGGG AACCCGC  | N |
| 8*Chr1_25a_ISBma8*Chr1_28a_ISBma2_A   | R   | 2002721280  | 8  | 3036431-3038003 | Chr1 | ISBma2 | TCGAA CAGATTGCTGACAAAC ATGCTGAAGACGCCATG(TCCAGAAAGACAAAACCC AGCCCGC CCGCGCGTTCGGCGGG AGCCCGC   | N |
| 5*Chr1_148_ISBma5*Chr1_159a_ISBma2_A  | D-R | ATCC_10399  | 5  | 3037889-3039461 | Chr1 | ISBma2 | GGATT(CAGATTGCTGACAAAC ATGCTGAAGACGCCATG(TCCAGAAAGACAAAACCC AGGCCCGIACGGCCGATGAAGCGAGCCGCC     | N |
| 10*Chr1_1a_ISBma10*Chr1_159b_ISBma2_A | R   | PRL20       | 10 | 3039719-3041290 | Chr1 | ISBma2 | CGCTT(CAGATTGCTGACAAAC ATGCTGAAGACGCCATG(TCCAGAAAGACAAAACCC AGGCCCGIACGGCCGATGAAGCGAGCCGCC     | N |
| 8*Chr1_23a_ISBma8*Chr1_24_ISBma2_A    | D   | 2002721280  | 8  | 3066888-3068460 | Chr1 | ISBma2 | GGCAA CAGATTGCTGACAAAC ATGCTGAAGACGCCATG(TCCAGAAAGACAAAACCC ACCCGAGIACCCGCTTCGGAGGCG ACCCGAG   | N |
| 4*Chr1_163_ISBma2_A                   | N   | gb8_horse_4 | 4  | 3068266-3069838 | Chr1 | ISBma2 | CGCTT(CAGATTGCTGACAAAC ATGCTGAAGACGCCATG(TCCAGAAAGACAAAACCC TGCTCGCTTCGCTCGGAAGGCGAG TGCTCGCC  | Y |
| 9*Chr1_108_ISBma2_A                   | R   | SAVP1       | 9  | 3073996-3075559 | Chr1 | ISBma2 | ~~~~~CAGATTGCTGACAAAC ATGCTGAAGACGCCATG(TCCAGAAAGACAAAACCC AGCCCGIACCCCATATGGCCCTATCAGCCCGC    | N |
| 6*Chr1_110_ISBma2_A                   | N   | NCTC_10229  | 6  | 3075066-3076638 | Chr1 | ISBma2 | TCCCG CAGATTGCTGACAAAC ATGCTGAAGACGCCATG(TCCAGAAAGACAAAACCC AAGCCCT(GCCCTGCGATGTCAGG AAGCCCT   | N |
| 1*Chr1_163_ISBma2_A                   | N   | ATCC_23344  | 1  | 3082021-3083593 | Chr1 | ISBma2 | CGCTT(CAGATTGCTGACAAAC ATGCTGAAGACGCCATG(TCCAGAAAGACAAAACCC TGCTCGCTTCGCTCGGAAGGCGAG TGCTCGCC  | Y |
| 6*Chr1_108_ISBma2_A                   | N   | NCTC_10229  | 6  | 3098671-3100243 | Chr1 | ISBma2 | CGCTT(CAGATTGCTGACAAAC ATGCTGAAGACGCCATG(TCCAGAAAGACAAAACCC AGGCCCGIACCCCATATGGCCCTATCAGCCCGC  | Y |
| 8*Chr1_22b_ISBma8*Chr1_147_ISBma2_A   | D-R | 2002721280  | 8  | 3100401-3101948 | Chr1 | ISBma2 | GCCGC CAGATTGCTGACAAAC ATGCTGAAGACGCCATG(TCCAGAAAGACAAAACCC AGGCCCGIACGCCCGGAGACGCGG AGGCCGC   | N |
| 10*Chr1_163_ISBma2_A                  | N   | PRL20       | 10 | 3119525-3121095 | Chr1 | ISBma2 | CGCTT(CAGATTGCTGACAAAC ATGCTGAAGACGCCATG(TCCAGAAAGACAAAACCC TGCTCGCTTCGCTCGGAAGGCGAG TGCTCGCC  | Y |
| 6*Chr1_105b_ISBrr6*Chr1_107b_ISBma2_A | R   | NCTC_10229  | 6  | 3130076-3131648 | Chr1 | ISBma2 | AACGA CAGATTGCTGACAAAC ATGCTGAAGACGCCATG(TCCAGAAAGACAAAACCC AAGCCCGIACCCGCTGGTTTCAGCGI AAGCCCG | N |
| 6*Chr1_105a_ISBrr6*Chr1_107a_ISBma2_A | R   | NCTC_10229  | 6  | 3134127-3135699 | Chr1 | ISBma2 | TCCGG CAGATTGCTGACAAAC ATGCTGAAGACGCCATG(TCCAGAAAGACAAAACCC AAGCCCGIACCCGCTGGTTTCAGCGI AAGCCCG | N |
| 2*Chr1_25b_ISBma2*Chr1_28b_ISBma2_A   | R   | fmh         | 2  | 3135195-3136770 | Chr1 | ISBma2 | CGCCG CAGATTGCTGACAAAC ATGCTGAAGACGCCATG(TCCAGAAAGACAAAACCC AGGCCCGIACGCTGCGAGGACGGG AGGCCCG   | N |
| 7*Chr1_148_ISBma7*Chr1_159a_ISBma2_A  | D-R | NCTC_10247  | 7  | 3140775-3142376 | Chr1 | ISBma2 | ~~~~~CAGATTGCTGACAAAC ATGCTGAAGACGCCATG(TCCAGAAAGACAAAACCC AGGCCCGIACGGCCGATGAAGCGAGGCCCG      | N |
| 8*Chr1_144_ISBma2_B                   | N   | 2002721280  | 8  | 3145687-3147259 | Chr1 | ISBma2 | GCCGC CAGATTGCTGACAAAC ATGCTGAAGACGCCATG(TCCAGAAAGACAAAACCC AGGCCCGIACGCCCGGATGCGGG AGGCCCG    | N |
| 7*Chr1_23a_ISBma2_A                   | R   | NCTC_10247  | 7  | 3149499-3151071 | Chr1 | ISBma2 | ATTTC CAGATTGCTGACAAAC ATGCTGAAGACGCCATG(TCCAGAAAGACAAAACCC ACCCGAGIACCCCGCTTCGGCGGG ACCGCG    | N |
| 3*Chr1_25b_ISBma3*Chr1_28b_ISBma2_A   | R   | JHU         | 3  | 3152397-3153972 | Chr1 | ISBma2 | CGCCG CAGATTGCTGACAAAC ATGCTGAAGACGCCATG(TCCAGAAAGACAAAACCC AGGCCCGIACGCTGCGAGGACGGG AGGCCCG   | N |
| 9*Chr1_125a_ISBma2_A                  | N   | SAVP1       | 9  | 3162470-3164042 | Chr1 | ISBma2 | AGCCG CAGATTGCTGACAAAC ATGCTGAAGACGCCATG(TCCAGAAAGACAAAACCC AACCCGCIACCCGCTTCGGCCATCAGCCCGC    | N |
| 5*Chr1_163_ISBma2_A                   | N   | ATCC_10399  | 5  | 3169120-3170692 | Chr1 | ISBma2 | CGCTT(CAGATTGCTGACAAAC ATGCTGAAGACGCCATG(TCCAGAAAGACAAAACCC TGCTCGCTTCGCTCGGAAGGCGAG TGCTCGCC  | Y |
| 7*Chr1_22b_ISBma7*Chr1_147_ISBma2_A   | D-R | NCTC_10247  | 7  | 3182889-3184461 | Chr1 | ISBma2 | GCCGC CAGATTGCTGACAAAC ATGCTGAAGACGCCATG(TCCAGAAAGACAAAACCC AGGCCCGIACGCCCGGAGACGCGG AGGCCCG   | N |
| 2*Chr1_25a_ISBma2*Chr1_28a_ISBma2_A   | R   | fmh         | 2  | 3187985-3189557 | Chr1 | ISBma2 | TCGAA CAGATTGCTGACAAAC ATGCTGAAGACGCCATG(TCCAGAAAGACAAAACCC AGCCCGC CCGCGCGTTCGGCGGG AGCCCGC   | N |
| 3*Chr1_25a_ISBma3*Chr1_28a_ISBma2_A   | R   | JHU         | 3  | 3204878-3206450 | Chr1 | ISBma2 | TCCGA CAGATTGCTGACAAAC ATGCTGAAGACGCCATG(TCCAGAAAGACAAAACCC AGCCCGC CCGCGCTTCGGCGGG AGCCCGC    | N |
| 8*Chr1_13b_ISBma8*Chr1_32a_ISBma2_A   | R   | 2002721280  | 8  | 3218859-3220433 | Chr1 | ISBma2 | TGTGT(CAGATTGCTGACAAAC ATGCTGAAGACGCCATG(TCCAGAAAGACAAAACCC AACGGAGIACGAGCGGCCGGAAGGCAACGGAG   | N |
| 2*Chr1_24_ISBma2_A                    | N   | fmh         | 2  | 3218895-3220466 | Chr1 | ISBma2 | GGCAA CAGATTGCTGACAAAC ATGCTGAAGACGCCATG(TCCAGAAAGACAAAACCC AACCCGCIACCCCGCTTCGGAGG ACCCCGC    | Y |
| 4*Chr1_25b_ISBma4*Chr1_28b_ISBma2_A   | R   | gb8_horse_4 | 4  | 3222056-3223631 | Chr1 | ISBma2 | CGCCG CAGATTGCTGACAAAC ATGCTGAAGACGCCATG(TCCAGAAAGACAAAACCC AGGCCCGIACGCTGCGAGGACGGG AGCCCGC   | N |
| 7*Chr1_144_ISBma2_B                   | N   | NCTC_10247  | 7  | 3228362-3229936 | Chr1 | ISBma2 | GCCGC CAGATTGCTGACAAAC ATGCTGAAGACGCCATG(TCCAGAAAGACAAAACCC AGCCCGIACGCCCGGATGCGGG AGCCCGC     | Y |
| 1*Chr1_25b_ISBma1*Chr1_28b_ISBma2_A   | R   | ATCC_23344  | 1  | 3235804-3237379 | Chr1 | ISBma2 | CGCCG CAGATTGCTGACAAAC ATGCTGAAGACGCCATG(TCCAGAAAGACAAAACCC AGGCCCGIACGCTGCGAGGACGGG AGCCCGC   | Y |
| 3*Chr1_24_ISBma2_A                    | N   | JHU         | 3  | 3236786-3238357 | Chr1 | ISBma2 | GGCAA CAGATTGCTGACAAAC ATGCTGAAGACGCCATG(TCCAGAAAGACAAAACCC AACCCGCIACCCCGCTTCGGAGG ACCCCGC    | Y |
| 2*Chr1_13b_ISBma2*Chr1_23b_ISBma2_A   | R   | fmh         | 2  | 3247169-3248741 | Chr1 | ISBma2 | GCCGC CAGATTGCTGACAAAC ATGCTGAAGACGCCATG(TCCAGAAAGACAAAACCC AACGGAGIACCCGAGCGAAGGCTG AACGGAG   | N |
| 5*Chr1_1a_ISBma25*Chr1_159b_ISBma2_A  | R   | ATCC_10399  | 5  | 3248886-3250457 | Chr1 | ISBma2 | AGCTG CAGATTGCTGACAAAC ATGCTGAAGACGCCATG(TCCAGAAAGACAAAACCC GGGCCGC CCGCTGGTTTCAGCGI GGGCCGC   | N |
| 2*Chr1_120_ISBma2_A                   | N   | fmh         | 2  | 325136-326708   | Chr1 | ISBma2 | AGCCA CAGATTGCTGACAAAC ATGCTGAAGACGCCATG(TCCAGAAAGACAAAACCC GGGCCGCIACCCCGCTTCGGAGG ACCCCGC    | Y |
| 3*Chr1_13b_ISBma3*Chr1_23b_ISBma2_A   | R   | JHU         | 3  | 3265431-3267003 | Chr1 | ISBma2 | GCCGC CAGATTGCTGACAAAC ATGCTGAAGACGCCATG(TCCAGAAAGACAAAACCC AACGGAGIACCCGAGCGAAGGCTG AACGGAG   | N |
| 8*Chr1_120_ISBma2_A                   | N   | 2002721280  | 8  | 326581-328153   | Chr1 | ISBma2 | AGCCA CAGATTGCTGACAAAC ATGCTGAAGACGCCATG(TCCAGAAAGACAAAACCC GGGCCGCIACCCCGCTTCGGAGG ACCCCGC    | Y |
| 3*Chr1_120_ISBma2_A                   | N   | JHU         | 3  | 326740-328312   | Chr1 | ISBma2 | AGCCA CAGATTGCTGACAAAC ATGCTGAAGACGCCATG(TCCAGAAAGACAAAACCC GGGCCGCIACCCCGCTTCGGAGG ACCCCGC    | Y |
| 6*Chr1_104_ISBma2_A                   | N   | NCTC_10229  | 6  | 3271547-3273119 | Chr1 | ISBma2 | TCCCC CAGATTGCTGACAAAC ATGCTGAAGACGCCATG(TCCAGAAAGACAAAACCC ACCGGGCIACCCGCTTCGGAGG ACCCCGC     | Y |
| 10*Chr1_25b_ISBrr10*Chr1_28b_ISBma2_A | R   | PRL20       | 10 | 3271661-3273235 | Chr1 | ISBma2 | CGCCG CAGATTGCTGACAAAC ATGCTGAAGACGCCATG(TCCAGAAAGACAAAACCC AGGCCCGIACGCTGCGAGGACGGG AGGCCCG   | N |
| 4*Chr1_25a_ISBma4*Chr1_28a_ISBma2_A   | R   | gb8_horse_4 | 4  | 3274537-3276109 | Chr1 | ISBma2 | TCGAA CAGATTGCTGACAAAC ATGCTGAAGACGCCATG(TCCAGAAAGACAAAACCC AGCCCGC CCGCGCGTTCGGCGGG AGCCCGC   | N |
| 9*Chr1_163_ISBma2_A                   | N   | SAVP1       | 9  | 3283458-3285029 | Chr1 | ISBma2 | CGCTT(CAGATTGCTGACAAAC ATGCTGAAGACGCCATG(TCCAGAAAGACAAAACCC TGCTCGCTTCGCTCGGAAGGCGAG TGCTCGCC  | Y |
| 1*Chr1_25a_ISBma1*Chr1_28a_ISBma2_A   | R   | ATCC_23344  | 1  | 3288285-3289857 | Chr1 | ISBma2 | TCGAA CAGATTGCTGACAAAC ATGCTGAAGACGCCATG(TCCAGAAAGACAAAACCC AGCCCGC CCGCGCGTTCGGCGGG AGCCCGC   | N |
| 2*Chr1_16_ISBma2_B                    | N   | fmh         | 2  | 3304741-3306313 | Chr1 | ISBma2 | CAAGA CAGATTGCTGACAAAC ATGCTGAAGACGCCATG(TCCAGAAAGACAAAACCC ACCGGAGIACCCGAGCGGAGGCT ACCGGAG    | Y |
| 4*Chr1_24_ISBma2_A                    | N   | gb8_horse_4 | 4  | 3305019-3306590 | Chr1 | ISBma2 | GGCAA CAGATTGCTGACAAAC ATGCTGAAGACGCCATG(TCCAGAAAGACAAAACCC AACCCGCIACCCCGCTTCGGAGG ACCCCGC    | Y |
| 5*Chr1_25b_ISBma5*Chr1_28b_ISBma2_A   | R   | ATCC_10399  | 5  | 3309804-3311376 | Chr1 | ISBma2 | GCCGC CAGATTGCTGACAAAC ATGCTGAAGACGCCATG(TCCAGAAAGACAAAACCC AGGCCCGIACGCTGCGAGGACGGG AGCCCGC   | N |
| 1*Chr1_24_ISBma2_A                    | N   | ATCC_23344  | 1  | 3318742-3320313 | Chr1 | ISBma2 | GGCAA CAGATTGCTGACAAAC ATGCTGAAGACGCCATG(TCCAGAAAGACAAAACCC AACCCGCIACCCCGCTTCGGAGG ACCCCGC    | Y |
| 3*Chr1_16_ISBma2_B                    | N   | JHU         | 3  | 3322942-3324514 | Chr1 | ISBma2 | CAAGA CAGATTGCTGACAAAC ATGCTGAAGACGCCATG(TCCAGAAAGACAAAACCC ACCGGAGIACCCGAGCGGAGGCT ACCGGAG    | Y |
| 10*Chr1_25a_ISBrr10*Chr1_28a_ISBma2_A | R   | PRL20       | 10 | 3325434-3326700 | Chr1 | ISBma2 | TCGAA CAGATTGCTGACAAAC ATGCTGAAGACGCCATG(TCCAGAAAGACAAAACCC AACCCGCIACCCCGCTTCGGAGG ACCCCGC    | N |
| 4*Chr1_13b_ISBma4*Chr1_23b_ISBma2_A   | R   | gb8_horse_4 | 4  | 3333036-3334608 | Chr1 | ISBma2 | GCCGC CAGATTGCTGACAAAC ATGCTGAAGACGCCATG(TCCAGAAAGACAAAACCC AACGGAGIACCCGAGCGAAGGCTG AACGGAG   | N |
| 8*Chr1_19a_ISBma2_A                   | N   | 2002721280  | 8  | 3336593-3338164 | Chr1 | ISBma2 | GCAGC CAGATTGCTGACAAAC ATGCTGAAGACGCCATG(TCCAGAAAGACAAAACCC ACCGGAGIACCCGAGCGGCGCTCC ACCGGAG   | N |
| 1*Chr1_13b_ISBma1*Chr1_23b_ISBma2_A   | R   | ATCC_23344  | 1  | 3346749-3348321 | Chr1 | ISBma2 | GCCGC CAGATTGCTGACAAAC ATGCTGAAGACGCCATG(TCCAGAAAGACAAAACCC AACGGAGIACCCGAGCGAAGGCTG AACGGAG   | N |
| 10*Chr1_24_ISBma2_A                   | N   | PRL20       | 10 | 3356063-3357634 | Chr1 | ISBma2 | GGCAA CAGATTGCTGACAAAC ATGCTGAAGACGCCATG(TCCAGAAAGACAAAACCC AGCCCGCIACCCCGCTTCGGAGG ACCCCGC    | N |
| 9*Chr1_139b_ISBrr9*Chr1_141b_ISBma2_A | R   | SAVP1       | 9  | 335753-337325   | Chr1 | ISBma2 | CCTC1 CAGATTGCTGACAAAC ATGCTGAAGACGCCATG(TCCAGAAAGACAAAACCC GGGCCGCIACCCCGCTTCGGAGG ACCCCGC    | N |
| 6*Chr1_101_ISBma6*Chr1_102_ISBma2_A   | D   | NCTC_10229  | 6  | 3359529-3361101 | Chr1 | ISBma2 | GCTC1 CAGATTGCTGACAAAC ATGCTGAAGACGCCATG(TCCAGAAAGACAAAACCC GGGCCGCTAGGCCCGCAGGCGG GGGCCGT     | N |
| 5*Chr1_25a_ISBma5*Chr1_28a_ISBma2_A   | R   | ATCC_10399  | 5  | 3362254-3363825 | Chr1 | ISBma2 | TCGAA CAGATTGCTGACAAAC ATGCTGAAGACGCCATG(TCCAGAAAGACAAAACCC AGCCCGC CCGCGCTTCGGCGGG AGCCCGC    | N |
| 9*Chr1_1a_ISBma29*Chr1_159b_ISBma2_A  | R   | SAVP1       | 9  | 3363178-3364749 | Chr1 | ISBma2 | AGCTG CAGATTGCTGACAAAC ATGCTGAAGACGCCATG(TCCAGAAAGACAAAACCC GGGCCGC CCGCTGGTTTCAGCGI GGGCCGC   | N |
| 2*Chr1_19a_ISBma2_A                   | N   | fmh         | 2  | 3368613-3370185 | Chr1 | ISBma2 | CACGG CAGATTGCTGACAAAC ATGCTGAAGACGCCATG(TCCAGAAAGACAAAACCC AGCCGAGIACCCGAGGCGGCTGCGI AGCCGAG  | N |
| 3*Chr1_19a_ISBma2_A                   | N   | JHU         | 3  | 3387044-3388616 | Chr1 | ISBma2 | GCAGC CAGATTGCTGACAAAC ATGCTGAAGACGCCATG(TCCAGAAAGACAAAACCC AGCCGAGIACCCGAGGCGGCTGCGI AGCCGAG  | Y |

#15407A CCGCGCGTTCGGCGG #15407A

|                                        |     |             |    |                 |      |        |                                                                                                  |      |
|----------------------------------------|-----|-------------|----|-----------------|------|--------|--------------------------------------------------------------------------------------------------|------|
| 4*Chr1_16_ISBma2_B                     | N   | gb8_horse_4 | 4  | 3388601-3390173 | Chr1 | ISBma2 | CAAGA CAGATTGCTGACAAAC ATGCTGAAGACGCCATGCTCCAGAAAGACAAAACCC ACCGGAGI ACCGGAGCGGAGGCT ACCGGAG     | Y    |
| 5*Chr1_24_ISBma2_A                     | N   | ATCC_10399  | 5  | 3392781-3394352 | Chr1 | ISBma2 | GGCAA CAGATTGCTGACAAAC ATGCTGAAGACGCCATGCTCCAGAAAGACAAAACCC AACCCGC(AACCCGCCTGGAGGC AACCCGC      | Y    |
| 7*Chr1_13b_ISBma2_7*Chr1_151b_ISBma2_A | R   | NCTC_10247  | 7  | 3400063-3401662 | Chr1 | ISBma2 | ~~~~~ CAGATTGCTGACAAAC ATGCTGAAGACGCCATGCTCCAGAAAGACAAAACCC AACGGAC(AAGCCGCCTTTCGGCC(AACGGAC     | N    |
| 1*Chr1_16_ISBma2_B                     | N   | ATCC_23344  | 1  | 3402607-3404179 | Chr1 | ISBma2 | CAAGA CAGATTGCTGACAAAC ATGCTGAAGACGCCATGCTCCAGAAAGACAAAACCC ACCGGAGI ACCGGAGCGGAGGCT ACCGGAG     | Y    |
| 8*Chr1_3054_ISBma2_A                   | R   | 2002721280  | 8  | 3403054-3404616 | Chr1 | ISBma2 | ~~~~~ AGGGGGCAGTCAAAT ATGCTGAAGACGCCATGCTCCAGAAAGACAAAACCC AACCCGC(AAGCCATTTGCCCTATC AACCCGC     | N    |
| 2*Chr1_121_ISBma2_A                    | N   | fmh         | 2  | 340994-341134   | Chr1 | ISBma2 | #IS407/~~~~~ TCCAGAAAGACAAAACCC AAGCCCTT#IS407A                                                  | N.D. |
| 5*Chr1_13b_ISBma2_5*Chr1_23b_ISBma2_A  | R   | ATCC_10399  | 5  | 3421617-3423189 | Chr1 | ISBma2 | CGCGC CAGATTGCTGACAAAC ATGCTGAAGACGCCATGCTCCAGAAAGACAAAACCC AACGGAC(AACCCGCAGGAGGCTG AACGGAC     | N    |
| 8*Chr1_121_ISBma2_A                    | N   | 2002721280  | 8  | 342439-342579   | Chr1 | ISBma2 | #IS407/~~~~~ TCCAGAAAGACAAAACCC AAGCCCTT#IS407A                                                  | N.D. |
| 3*Chr1_121_ISBma2_A                    | N   | JHU         | 3  | 342598-342738   | Chr1 | ISBma2 | #IS407/~~~~~ TCCAGAAAGACAAAACCC AAGCCCTT#IS407A                                                  | N.D. |
| 4*Chr1_19a_ISBma2_A                    | N   | gb8_horse_4 | 4  | 3452144-3453716 | Chr1 | ISBma2 | GCACG CAGATTGCTGACAAAC ATGCTGAAGACGCCATGCTCCAGAAAGACAAAACCC AGCGGAG AGCGGAGGGCGCTCGCC AGCGGAG    | Y    |
| 1*Chr1_19a_ISBma2_A                    | N   | ATCC_23344  | 1  | 3466142-3467714 | Chr1 | ISBma2 | GCACG CAGATTGCTGACAAAC ATGCTGAAGACGCCATGCTCCAGAAAGACAAAACCC AGCGGAG AGCGGAGGGCGCTCGCC AGCGGAG    | Y    |
| 10*Chr1_19a_ISBma2_A                   | N   | PRL20       | 10 | 3468840-3470412 | Chr1 | ISBma2 | GCACG CAGATTGCTGACAAAC ATGCTGAAGACGCCATGCTCCAGAAAGACAAAACCC AGCGGAG AGCGGAGGGCGCTCGCC AGCGGAG    | Y    |
| 7*Chr1_155_ISBma2_B                    | N   | NCTC_10247  | 7  | 3470928-3472505 | Chr1 | ISBma2 | CCTTC CAGATTGCTGACAAAC ATGCTGAAGACGCCATGCTCCAGAAAGACAAAACCC GGCTGGA GGCTGGAATCCGGGA GGCTGGA      | Y    |
| 2*Chr1_23a_ISBma2_2*Chr1_32a_ISBma2_A  | R   | fmh         | 2  | 3472335-3473907 | Chr1 | ISBma2 | TGTGT(CAGATTGCTGACAAAC ATGCTGAAGACGCCATGCTCCAGAAAGACAAAACCC ACCGCAGI AGAGCGGCCCGAAGGC ACCGCAGI   | N    |
| 5*Chr1_16_ISBma2_B                     | N   | ATCC_10399  | 5  | 3477498-3479070 | Chr1 | ISBma2 | CAAGA CAGATTGCTGACAAAC ATGCTGAAGACGCCATGCTCCAGAAAGACAAAACCC ACCGGAGI ACCGGAGCGGAGGCT ACCGGAG     | N    |
| 9*Chr1_1b_ISBma2_A                     | R   | SAVP1       | 9  | 3479600-3481131 | Chr1 | ISBma2 | #IS407/~~~~~ GGTGAGAAGACGCCATGCTCCAGAAAGACAAAACCC AACCCGC#IS407A                                 | N.D. |
| 3*Chr1_23a_ISBma2_3*Chr1_32a_ISBma2_A  | R   | JHU         | 3  | 3492452-3494024 | Chr1 | ISBma2 | TGTGT(CAGATTGCTGACAAAC ATGCTGAAGACGCCATGCTCCAGAAAGACAAAACCC ACCGCAGI AGAGCGGCCCGAAGGC ACCGCAGI   | N    |
| 2*Chr1_22a_ISBma2_A                    | N   | fmh         | 2  | 3507025-3508597 | Chr1 | ISBma2 | GCCGC CAGATTGCTGACAAAC ATGCTGAAGACGCCATGCTCCAGAAAGACAAAACCC AGCCCGC(AAGCCGCGAGACGCCG AGCCCGC     | Y    |
| 3*Chr1_22a_ISBma2_A                    | N   | JHU         | 3  | 3527903-3529475 | Chr1 | ISBma2 | GCCGC CAGATTGCTGACAAAC ATGCTGAAGACGCCATGCTCCAGAAAGACAAAACCC AGCCCGC(AAGCCGCGAGACGCCG AGCCCGC     | Y    |
| 2*Chr1_44a_ISBma2_2*Chr1_117a_ISBma2_A | R   | fmh         | 2  | 393333-394905   | Chr1 | ISBma2 | ACGGC CAGATTGCTGACAAAC ATGCTGAAGACGCCATGCTCCAGAAAGACAAAACCC AACCCGC(AACCCGGCTGGAAGCC AACCCGC     | N    |
| 3*Chr1_44a_ISBma2_3*Chr1_117a_ISBma2_A | R   | JHU         | 3  | 394492-396064   | Chr1 | ISBma2 | ACGGC CAGATTGCTGACAAAC ATGCTGAAGACGCCATGCTCCAGAAAGACAAAACCC AACCCGC(AACCCGGCTGGAAGCC AACCCGC     | N    |
| 8*Chr1_44a_ISBma2_8*Chr1_117a_ISBma2_A | R   | 2002721280  | 8  | 396339-397912   | Chr1 | ISBma2 | ACGGC CAGATTGCTGACAAAC ATGCTGAAGACGCCATGCTCCAGAAAGACAAAACCC AACCCGC(AACCCGGCTGGAAGCC AACCCGC     | N    |
| 10*Chr1_118_ISBma2_A                   | N   | PRL20       | 10 | 400418-401990   | Chr1 | ISBma2 | CGATC(CAGATTGCTGACAAAC ATGCTGAAGACGCCATGCTCCAGAAAGACAAAACCC AAGCGC(AAGCGCCCGGGCAAC AAGCGCC       | Y    |
| 4*Chr1_39a_ISBma2_4*Chr1_117b_ISBma2_A | R   | gb8_horse_4 | 4  | 401987-403559   | Chr1 | ISBma2 | TTTTCG CAGATTGCTGACAAAC ATGCTGAAGACGCCATGCTCCAGAAAGACAAAACCC AAGCCCT(AACCCGGCTGGAAGCC AAGCCCT    | N    |
| 1*Chr1_39a_ISBma2_1*Chr1_117b_ISBma2_A | R   | ATCC_23344  | 1  | 403674-405246   | Chr1 | ISBma2 | TTTTCG CAGATTGCTGACAAAC ATGCTGAAGACGCCATGCTCCAGAAAGACAAAACCC AAGCCCT(AACCCGGCTGGAAGCC AAGCCCT    | N    |
| 4*Chr1_118_ISBma2_A                    | N   | gb8_horse_4 | 4  | 411034-412606   | Chr1 | ISBma2 | CGATC(CAGATTGCTGACAAAC ATGCTGAAGACGCCATGCTCCAGAAAGACAAAACCC AAGCGC(AAGCGCCCGGGCAAC AAGCGCC       | Y    |
| 1*Chr1_118_ISBma2_A                    | N   | ATCC_23344  | 1  | 412720-414292   | Chr1 | ISBma2 | CGATC(CAGATTGCTGACAAAC ATGCTGAAGACGCCATGCTCCAGAAAGACAAAACCC AAGCGC(AAGCGCCCGGGCAAC AAGCGCC       | Y    |
| 10*Chr1_120_ISBma2_A                   | N   | PRL20       | 10 | 436971-438543   | Chr1 | ISBma2 | AGCCA CAGATTGCTGACAAAC ATGCTGAAGACGCCATGCTCCAGAAAGACAAAACCC GGCGCC(GGGCCCGCAGGGGG GGGCCCG        | Y    |
| 5*Chr1_39a_ISBma2_5*Chr1_117b_ISBma2_A | R   | ATCC_10399  | 5  | 440655-442227   | Chr1 | ISBma2 | TTTTCG CAGATTGCTGACAAAC ATGCTGAAGACGCCATGCTCCAGAAAGACAAAACCC AAGCCCT(AACCCGGCTGGAAGCC AAGCCCT    | N    |
| 4*Chr1_120_ISBma2_A                    | N   | gb8_horse_4 | 4  | 447575-449147   | Chr1 | ISBma2 | AGCCA CAGATTGCTGACAAAC ATGCTGAAGACGCCATGCTCCAGAAAGACAAAACCC GGCGCC(GGGCCCGCAGGGGG GGGCCCG        | Y    |
| 1*Chr1_120_ISBma2_A                    | N   | ATCC_23344  | 1  | 449261-450833   | Chr1 | ISBma2 | AGCCA CAGATTGCTGACAAAC ATGCTGAAGACGCCATGCTCCAGAAAGACAAAACCC GGCGCC(GGGCCCGCAGGGGG GGGCCCG        | Y    |
| 5*Chr1_118_ISBma2_A                    | N   | ATCC_10399  | 5  | 449701-451273   | Chr1 | ISBma2 | CGATC(CAGATTGCTGACAAAC ATGCTGAAGACGCCATGCTCCAGAAAGACAAAACCC AAGCGC(AAGCGCCCGGGCAAC AAGCGCC       | Y    |
| 10*Chr1_121_ISBma2_A                   | N   | PRL20       | 10 | 452829-452969   | Chr1 | ISBma2 | #IS407/~~~~~ TCCAGAAAGACAAAACCC AAGCCCTT#IS407A                                                  | N.D. |
| 10*Chr1_123_ISBma2_C                   | N   | PRL20       | 10 | 454308-455880   | Chr1 | ISBma2 | TGGCA CAGATTGCTGACAAAC ATGCTGAAGACGCCATGCTCCAGAAAGACAAAACCC AGCCCGC(AAGCCGCTGGAAGG AGCCCGC       | Y    |
| 4*Chr1_121_ISBma2_A                    | N   | gb8_horse_4 | 4  | 463433-463573   | Chr1 | ISBma2 | #IS407/~~~~~ TCCAGAAAGACAAAACCC AAGCCCTT#IS407A                                                  | N.D. |
| 1*Chr1_121_ISBma2_A                    | N   | ATCC_23344  | 1  | 465119-465259   | Chr1 | ISBma2 | #IS407/~~~~~ TCCAGAAAGACAAAACCC AAGCCCTT#IS407A                                                  | N.D. |
| 9*Chr1_139a_ISBma2_9*Chr1_147_ISBma2_A | D-R | SAVP1       | 9  | 479288-480860   | Chr1 | ISBma2 | GCCCT(CAGATTGCTGACAAAC ATGCTGAAGACGCCATGCTCCAGAAAGACAAAACCC AGCGCC(CCGCGCATGGCGCC AGGGCC         | N    |
| 5*Chr1_120_ISBma2_A                    | N   | ATCC_10399  | 5  | 486272-487844   | Chr1 | ISBma2 | AGCCA CAGATTGCTGACAAAC ATGCTGAAGACGCCATGCTCCAGAAAGACAAAACCC GGCGCC(GGGCCCGCAGGGGG GGGCCCG        | Y    |
| 10*Chr1_117a_ISBma2_A                  | N   | PRL20       | 10 | 489817-491390   | Chr1 | ISBma2 | TTTTCG CAGATTGCTGACAAAC ATGCTGAAGACGCCATGCTCCAGAAAGACAAAACCC AACCCGC(AACCCGGCTGGAAGCC AACCCGC    | N    |
| 5*Chr1_121_ISBma2_A                    | N   | ATCC_10399  | 5  | 502130-502270   | Chr1 | ISBma2 | #IS407/~~~~~ TCCAGAAAGACAAAACCC AAGCCCTT#IS407A                                                  | N.D. |
| 4*Chr1_44a_ISBma2_4*Chr1_117a_ISBma2_A | R   | gb8_horse_4 | 4  | 515358-516930   | Chr1 | ISBma2 | ACGGC CAGATTGCTGACAAAC ATGCTGAAGACGCCATGCTCCAGAAAGACAAAACCC AACCCGC(AACCCGGCTGGAAGCC AACCCGC     | N    |
| 3*Chr1_13a_ISBma2_3*Chr1_32b_ISBma2_A  | R   | JHU         | 3  | 51562-53134     | Chr1 | ISBma2 | GCGAC CAGATTGCTGACAAAC ATGCTGAAGACGCCATGCTCCAGAAAGACAAAACCC GAGCGGC GACCCGCTGGCGGCT GAGCGGC      | N    |
| 1*Chr1_44a_ISBma2_1*Chr1_117a_ISBma2_A | R   | ATCC_23344  | 1  | 517013-518585   | Chr1 | ISBma2 | ACGGC CAGATTGCTGACAAAC ATGCTGAAGACGCCATGCTCCAGAAAGACAAAACCC AACCCGC(AACCCGGCTGGAAGCC AACCCGC     | N    |
| 2*Chr1_13a_ISBma2_2*Chr1_32b_ISBma2_A  | R   | fmh         | 2  | 51985-53557     | Chr1 | ISBma2 | GCGAC CAGATTGCTGACAAAC ATGCTGAAGACGCCATGCTCCAGAAAGACAAAACCC GAGCGGC GACCCGCTGGCGGCT GAGCGGC      | N    |
| 8*Chr1_13a_ISBma2_8*Chr1_32b_ISBma2_A  | R   | 2002721280  | 8  | 52889-54461     | Chr1 | ISBma2 | GCGAC CAGATTGCTGACAAAC ATGCTGAAGACGCCATGCTCCAGAAAGACAAAACCC GAGCGGC GACCCGCTGGCGGCT GAGCGGC      | N    |
| 5*Chr1_13a_ISBma2_5*Chr1_23a_ISBma2_A  | R   | ATCC_10399  | 5  | 53180-54752     | Chr1 | ISBma2 | GCGAC CAGATTGCTGACAAAC ATGCTGAAGACGCCATGCTCCAGAAAGACAAAACCC ACCGCAGI GACCCGCTGGCGGCT ACCGCAGI    | N    |
| 5*Chr1_44a_ISBma2_5*Chr1_117a_ISBma2_A | R   | ATCC_10399  | 5  | 556580-558152   | Chr1 | ISBma2 | GCACG CAGATTGCTGACAAAC ATGCTGAAGACGCCATGCTCCAGAAAGACAAAACCC AACCCGC(AAAACCCGGCTGGAAG AACCCGC     | N    |
| 2*Chr1_50_ISBma2_A                     | N   | fmh         | 2  | 575878-577450   | Chr1 | ISBma2 | GCGAC CAGATTGCTGACAAAC ATGCTGAAGACGCCATGCTCCAGAAAGACAAAACCC GGGCGC(GGGCGCGACTACT GGGCGCG         | Y    |
| 9*Chr1_41_ISBma2_A                     | N   | SAVP1       | 9  | 576498-577387   | Chr1 | ISBma2 | AATCA(CAGATTGCTGACAAAC ATGCTGAAGACGCCATGCT# #IS407A CCCTCCACTGGAGGGC #IS407A                     | N.D. |
| 3*Chr1_50_ISBma2_A                     | N   | JHU         | 3  | 579136-580708   | Chr1 | ISBma2 | GCGAC CAGATTGCTGACAAAC ATGCTGAAGACGCCATGCTCCAGAAAGACAAAACCC GGGCGC(GGGCGCGACTACT GGGCGC          | Y    |
| 9*Chr1_39b_ISBma2_9*Chr1_44b_ISBma2_A  | R   | SAVP1       | 9  | 583222-584794   | Chr1 | ISBma2 | GCGG CAGATTGCTGACAAAC ATGCTGAAGACGCCATGCTCCAGAAAGACAAAACCC AAAAAACCC(CGGCCGCTCCGGGGC AAAAAAC     | N    |
| 4*Chr1_23a_ISBma2_4*Chr1_32a_ISBma2_A  | R   | gb8_horse_4 | 4  | 58363-59935     | Chr1 | ISBma2 | TGTGT(CAGATTGCTGACAAAC ATGCTGAAGACGCCATGCTCCAGAAAGACAAAACCC ACCGCAGI AGAGCGGCCCGAAGGC ACCGCAGI   | N    |
| 1*Chr1_23a_ISBma2_1*Chr1_32a_ISBma2_A  | R   | ATCC_23344  | 1  | 58691-60263     | Chr1 | ISBma2 | TGTGT(CAGATTGCTGACAAAC ATGCTGAAGACGCCATGCTCCAGAAAGACAAAACCC ACCGCAGI AGAGCGGCCCGAAGGC ACCGCAGI   | N    |
| 2*Chr1_52_ISBma2_A                     | N   | fmh         | 2  | 631884-633456   | Chr1 | ISBma2 | CCGGA CAGATTGCTGACAAAC ATGCTGAAGACGCCATGCTCCAGAAAGACAAAACCC ACGCGC(AAGCCGCGCTCACGC ACGCGCG       | Y    |
| 3*Chr1_52_ISBma2_A                     | N   | JHU         | 3  | 635378-636950   | Chr1 | ISBma2 | CCGGA CAGATTGCTGACAAAC ATGCTGAAGACGCCATGCTCCAGAAAGACAAAACCC ACGCGC(AAGCCGCGCTCACGC ACGCGCG       | Y    |
| 10*Chr1_50_ISBma2_A                    | N   | PRL20       | 10 | 668438-670010   | Chr1 | ISBma2 | AGCGA CAGATTGCTGACAAAC ATGCTGAAGACGCCATGCTCCAGAAAGACAAAACCC #contig_br GGGGGCGGACTACT #contig_br | N    |
| 9*Chr1_39a_ISBma2_9*Chr1_44a_ISBma2_A  | R   | SAVP1       | 9  | 693678-695250   | Chr1 | ISBma2 | ACGGC CAGATTGCTGACAAAC ATGCTGAAGACGCCATGCTCCAGAAAGACAAAACCC AGCCCTC(AACCCGGCTGGAAGCC AGCCCTC     | N    |
| 4*Chr1_50_ISBma2_A                     | N   | gb8_horse_4 | 4  | 693979-695542   | Chr1 | ISBma2 | GCGAC CAGATTGCTGACAAAC ATGCTGAAGACGCCATGCTCCAGAAAGACAAAACCC #contig_br GGGGGCGGACTACT #contig_br | N.D. |

|                                       |   |             |    |               |      |        |                                                                                              |      |
|---------------------------------------|---|-------------|----|---------------|------|--------|----------------------------------------------------------------------------------------------|------|
| 1*Chr1_50_ISBma2_A                    | N | ATCC_23344  | 1  | 699018-700590 | Chr1 | ISBma2 | GCGAC CAGATTGCTGACAAAC ATGCTGAAGACGCCATG(TCCAGAAAGACAAAACCC GGGGCGC GGGGCGGACGTACTC GGGGCGC  | Y    |
| 10*Chr1_52_ISBma2_A                   | N | PRL20       | 10 | 722740-724312 | Chr1 | ISBma2 | CCGGA CAGATTGCTGACAAAC ATGCTGAAGACGCCATG(TCCAGAAAGACAAAACCC ACGGCCG(ACGGCCGCTCACGC ACGGCCG   | Y    |
| 5*Chr1_50_ISBma2_A                    | N | ATCC_10399  | 5  | 735242-736814 | Chr1 | ISBma2 | GCGAC CAGATTGCTGACAAAC ATGCTGAAGACGCCATG(TCCAGAAAGACAAAACCC GGGGCGC GGGGCGGACGTACTC GGGGCGC  | Y    |
| 4*Chr1_52_ISBma2_A                    | N | gb8_horse_4 | 4  | 749747-751319 | Chr1 | ISBma2 | CCGGA CAGATTGCTGACAAAC ATGCTGAAGACGCCATG(TCCAGAAAGACAAAACCC ACGGCCG(ACGGCCGCTCACGC ACGGCCG   | Y    |
| 1*Chr1_52_ISBma2_A                    | N | ATCC_23344  | 1  | 754776-756348 | Chr1 | ISBma2 | CCGGA CAGATTGCTGACAAAC ATGCTGAAGACGCCATG(TCCAGAAAGACAAAACCC ACGGCCG(ACGGCCGCTCACGC ACGGCCG   | Y    |
| 5*Chr1_52_ISBma2_A                    | N | ATCC_10399  | 5  | 789822-791394 | Chr1 | ISBma2 | CCGGA CAGATTGCTGACAAAC ATGCTGAAGACGCCATG(TCCAGAAAGACAAAACCC ACGGCCG(ACGGCCGCTCACGC ACGGCCG   | Y    |
| 5*Chr1_22a_ISBma2_A                   | N | ATCC_10399  | 5  | 86761-88333   | Chr1 | ISBma2 | GCCGC CAGATTGCTGACAAAC ATGCTGAAGACGCCATG(TCCAGAAAGACAAAACCC AGCCCG(AGCCCGGAGACGCG AGCCCG     | Y    |
| 10*Chr1_13b_ISBr 10*Chr1_32a_ISBma2_A | R | PRL20       | 10 | 86972-88544   | Chr1 | ISBma2 | TGTGT CAGATTGCTGACAAAC ATGCTGAAGACGCCATG(TCCAGAAAGACAAAACCC AACGGAC(AGAGCGGCCGGAAG AACCGGAC  | N    |
| 6*Chr1_117a_ISBma2_A                  | N | NCTC_10229  | 6  | 915696-917293 | Chr1 | ISBma2 | TCGAC(CAGATTGCTGACAAAC ATGCTGAAGACGCCATG(TCCAGAAAGACAAAACCC AACCCGC(CCCGCTGGTTTACGCG AACCCGC | N    |
| 4*Chr1_22a_ISBma2_A                   | N | gb8_horse_4 | 4  | 91845-93417   | Chr1 | ISBma2 | GCCGC CAGATTGCTGACAAAC ATGCTGAAGACGCCATG(TCCAGAAAGACAAAACCC AGCCCG(AGCCCGGAGACGCG AGCCCG     | Y    |
| 1*Chr1_22a_ISBma2_A                   | N | ATCC_23344  | 1  | 92218-93790   | Chr1 | ISBma2 | GCCGC CAGATTGCTGACAAAC ATGCTGAAGACGCCATG(TCCAGAAAGACAAAACCC AGCCCG(AGCCCGGAGACGCG AGCCCG     | Y    |
| 6*Chr1_118_ISBma2_A                   | N | NCTC_10229  | 6  | 924787-926359 | Chr1 | ISBma2 | CGATC(CAGATTGCTGACAAAC ATGCTGAAGACGCCATG(TCCAGAAAGACAAAACCC AAGCGC(AAGCGCCGCGGCAAC AAGCGC    | Y    |
| 7*Chr1_90_ISBma2_A                    | N | NCTC_10247  | 7  | 960223-961410 | Chr1 | ISBma2 | #IS407/ ~~~~~ TCCAGAAAGACAAAACCC AAAGCCC(#IS407A AAAGCCC                                     | N.D. |
| 6*Chr1_120_ISBma2_A                   | N | NCTC_10229  | 6  | 962586-964158 | Chr1 | ISBma2 | AGCCA CAGATTGCTGACAAAC ATGCTGAAGACGCCATG(TCCAGAAAGACAAAACCC GGGCCCG(GCCGCCCGCAAGGGC GGGCCCG  | Y    |
| 6*Chr1_121_ISBma2_A                   | N | NCTC_10229  | 6  | 978444-978584 | Chr1 | ISBma2 | #IS407/ ~~~~~ TCCAGAAAGACAAAACCC AAGCCCTT#IS407A AAGCCCTT                                    | N.D. |

**Chromosome 2**

**IS 407 A**

|                                       |     |               |    |                 | 5'-ext | 5'-IR         | orfA                                                                                                  | intergenic region | orfB          | 3'-IR | 3'-ext | 5'-DR | 3'-DR | et duplicates |
|---------------------------------------|-----|---------------|----|-----------------|--------|---------------|-------------------------------------------------------------------------------------------------------|-------------------|---------------|-------|--------|-------|-------|---------------|
|                                       |     |               |    |                 |        | TGACCTGCCCCCT |                                                                                                       |                   | AGGGGGCAGGTCA |       |        |       |       |               |
| 10*Chr2_51_IS407A_A                   | N   | Bm_PRL20      | 10 | 1000862-1002097 | Chr2   | IS407A        | CGGCC TGACCTGCCCCC~TAC ATGAAGAAGCGCTTTACGCGCCCGCAAGCCAAACGCG; TGTTGGCCAGGGACTTTGCTAGAA(GGCGGCC GGCG   |                   |               |       |        | GGCG  |       | Y             |
| 5*Chr2_42_IS407A_A                    | N   | Bm_ATCC_1039  | 5  | 1004926-1006161 | Chr2   | IS407A        | ATCGA(TGACCTGCCCCC~TAC ATGAAGAAGCGCTTTACGCGCCCGCAAGCCAAACGCG; TGTTGGCCAGGGACTTTGCTAGAA(CTGCGGCC CTGC  |                   |               |       |        | CTGC  |       | Y             |
| 4*Chr2_51_IS407A_A                    | N   | Bm_gb8_horse_ | 4  | 1009373-1010608 | Chr2   | IS407A        | CGGCC TGACCTGCCCCC~TAC ATGAAGAAGCGCTTTACGCGCCCGCAAGCCAAACGCG; TGTTGGCCAGGGACTTTGCTAGAA(GGCGGCC GGCG   |                   |               |       |        | GGCG  |       | Y             |
| 3*Chr2_52_IS407A_A                    | N   | Bm_JHU        | 3  | 1011830-1013065 | Chr2   | IS407A        | GAATT(TGACCTGCCCCC~TAC ATGAAGAAGCGCTTTACGCGCCCGCAAGCCAAACGCG; TGTTGGCCAGGGACTTTGCTAGAA(CCGTACC GGAT   |                   |               |       |        | CCGT  |       | N             |
| 10*Chr2_38_IS407/10*Chr2_50_IS407A_B  | D-R | Bm_PRL20      | 10 | 1013932-1015167 | Chr2   | IS407A        | GTCCA(TGACCTGCCCCC~TAC ATGAAGAAGCGCTTTACGCGCCCGCAAGCCAAACGCG; TGTTGGCCAGGGACTTTGCTAGAA(CCGGAGA GAAC   |                   |               |       |        | CGCG  |       | N             |
| 1*Chr2_51_IS407A_A                    | N   | Bm_ATCC_2334  | 1  | 1014356-1015591 | Chr2   | IS407A        | CGGCC TGACCTGCCCCC~TAC ATGAAGAAGCGCTTTACGCGCCCGCAAGCCAAACGCG; TGTTGGCCAGGGACTTTGCTAGAA(GGCGGCC GGCG   |                   |               |       |        | GGCG  |       | Y             |
| 6*Chr2_23_IS407A_A                    | D-R | Bm_NCTC_102   | 6  | 1017427-1018662 | Chr2   | IS407A        | GCCGC TGACCTGCCCCC~TAC ATGAAGAAGCGCTTTACGCGCCCGCAAGCCAAACGCG; TGTTGGCCAGGGACTTTGCTAGAA(ATGGATT CGAT   |                   |               |       |        | ATGC  |       | N             |
| 10*Chr2_39_IS407/10*Chr2_44b_IS407A_A | R   | Bm_PRL20      | 10 | 1023389-1024624 | Chr2   | IS407A        | GACAG TGACCTGCCCCC~TAC ATGAAGAAGCGCTTTACGCGCCCGCAAGCCAAACGCG; TGTTGGCCAGGGACTTTGCTAGAA(CATGCGC CGCC   |                   |               |       |        | CATG  |       | N             |
| 4*Chr2_49_IS407A_A                    | N   | Bm_gb8_horse_ | 4  | 1028731-1029966 | Chr2   | IS407A        | CCCAA(TGACCTGCCCCC~TAC ATGAAGAAGCGCTTTACGCGCCCGCAAGCCAAACGCG; TGTTGGCCAGGGACTTTGCTAGAA(AGCGACG CCCA   |                   |               |       |        | AGCG  |       | N             |
| 2*Chr2_51_IS407A_A                    | N   | Bm_fmh        | 2  | 1031221-1032456 | Chr2   | IS407A        | GCCGC TGACCTGCCCCC~TAC ATGAAGAAGCGCTTTACGCGCCCGCAAGCCAAACGCG; TGTTGGCCAGGGACTTTGCTAGAA(GGCGGCC GGCG   |                   |               |       |        | GGCG  |       | Y             |
| 4*Chr2_72_IS407A_A                    | N   | Bm_gb8_horse_ | 4  | 103170-104405   | Chr2   | IS407A        | CACAT(TGACCTGCCCCC~TAC ATGAAGAAGCGCTTTACGCGCCCGCAAGCCAAACGCG; TGTTGGCCAGGGACTTTGCTAGAA(GATGGAT/ GATG  |                   |               |       |        | GATG  |       | Y             |
| 1*Chr2_72_IS407A_A                    | N   | Bm_ATCC_2334  | 1  | 103191-104426   | Chr2   | IS407A        | CACAT(TGACCTGCCCCC~TAC ATGAAGAAGCGCTTTACGCGCCCGCAAGCCAAACGCG; TGTTGGCCAGGGACTTTGCTAGAA(GATGGAT/ GATG  |                   |               |       |        | GATG  |       | Y             |
| 1*Chr2_49_IS407A_A                    | N   | Bm_ATCC_2334  | 1  | 1033957-1035192 | Chr2   | IS407A        | CCCAA(TGACCTGCCCCC~TAC ATGAAGAAGCGCTTTACGCGCCCGCAAGCCAAACGCG; TGTTGGCCAGGGACTTTGCTAGAA(AGCGACG CCCA   |                   |               |       |        | AGCG  |       | N             |
| 8*Chr2_17_IS407A 8*Chr2_38_IS407A_A   | D-R | Bm_200272128  | 8  | 1036615-1037850 | Chr2   | IS407A        | GTCCA(TGACCTGCCCCC~TAC ATGAAGAAGCGCTTTACGCGCCCGCAAGCCAAACGCG; TGTTGGCCAGGGACTTTGCTAGAA( GTGCGTT GAAC  |                   |               |       |        | GTGC  |       | N             |
| 7*Chr2_42_IS407A_A                    | N   | Bm_NCTC_102   | 7  | 1039995-1041230 | Chr2   | IS407A        | ATCGA(TGACCTGCCCCC~TAC ATGAAGAAGCGCTTTACGCGCCCGCAAGCCAAACGCG; TGTTGGCCAGGGACTTTGCTAGAA(CTGCGGCC CTGC  |                   |               |       |        | CTGC  |       | Y             |
| 7*Chr2_72_IS407A_A                    | N   | Bm_NCTC_102   | 7  | 104501-105736   | Chr2   | IS407A        | CACAT(TGACCTGCCCCC~TAC ATGAAGAAGCGCTTTACGCGCCCGCAAGCCAAACGCG; TGTTGGCCAGGGACTTTGCTAGAA(GATGGAT/ GATG  |                   |               |       |        | GATG  |       | Y             |
| 6*Chr2_28_IS407A 6*Chr2_31b_IS407A_A  | D   | Bm_NCTC_102   | 6  | 104943-106178   | Chr2   | IS407A        | GAACG TGACCTGCCCCC~TAC ATGAAGAAGCGCTTTACGCGCCCGCAAGCCAAACGCG; TGTTGGCCAGGGACTTTGCTAGAA(CGATGCT/ GATC  |                   |               |       |        | CGAT  |       | N             |
| 2*Chr2_49_IS407A_A                    | N   | Bm_fmh        | 2  | 1052180-1053415 | Chr2   | IS407A        | CCCAA(TGACCTGCCCCC~TAC ATGAAGAAGCGCTTTACGCGCCCGCAAGCCAAACGCG; TGTTGGCCAGGGACTTTGCTAGAA(AGCGACG CCCA   |                   |               |       |        | AGCG  |       | N             |
| 8*Chr2_10a_IS407/8*Chr2_15b_IS407A_A  | R   | Bm_200272128  | 8  | 1052451-1053615 | Chr2   | IS407A        | #contig ~~~~~ NNNAAAGAAGCGCTTTACGCGCCCGCAAGCCAAACGCG; TGTTGGCCAGGGACTTTGCTAGAA(ACAGTTTT reak          |                   |               |       |        | ACAG  |       | N             |
| 4*Chr2_44b_IS407/4*Chr2_48_IS407A_A   | R   | Bm_gb8_horse_ | 4  | 1056512-1057747 | Chr2   | IS407A        | GACAG TGACCTGCCCCC~TAC ATGAAGAAGCGCTTTACGCGCCCGCAAGCCAAACGCG; TGTTGGCCAGGGACTTTGCTAGAA(CGGACG. CGCC   |                   |               |       |        | CGCC  |       | N             |
| 10*Chr2_45_IS407A_B                   | N   | Bm_PRL20      | 10 | 1057806-1059041 | Chr2   | IS407A        | GCCGC TGACCTGCCCCC~TAC ATGAAGAAGCGCTTTACGCGCCCGCAAGCCAAACGCG; TGTTGGCCAGGGACTTTGCTAGAA(GCCCGC CTTT    |                   |               |       |        | GCCC  |       | N             |
| 1*Chr2_44b_IS407/1*Chr2_48_IS407A_A   | R   | Bm_ATCC_2334  | 1  | 1061754-1062989 | Chr2   | IS407A        | GACAG TGACCTGCCCCC~TAC ATGAAGAAGCGCTTTACGCGCCCGCAAGCCAAACGCG; TGTTGGCCAGGGACTTTGCTAGAA(CGGACG. CGCC   |                   |               |       |        | CGCC  |       | N             |
| 8*Chr2_10b_IS407A_A                   | R   | Bm_200272128  | 8  | 106411-107646   | Chr2   | IS407A        | CGCTC(TGACCTGCCCCC~TAC ATGAAGAAGCGCTTTACGCGCCCGCAAGCCAAACGCG; TGTTGGCCAGGGACTTTGCTAGAA( ITTGCTAG CGCG |                   |               |       |        | TTTG  |       | N             |
| 8*Chr2_9a_IS407A_A                    | N   | Bm_200272128  | 8  | 1069857-1071092 | Chr2   | IS407A        | CATGCTGACCTGCCCCC~TAC ATGAAGAAGCGCTTTACGCGCCCGCAAGCCAAACGCG; TGTTGGCCAGGGACTTTGCTAGAA(CAAGCAG/ CAAG   |                   |               |       |        | CAAG  |       | Y             |
| 2*Chr2_44b_IS407/2*Chr2_48_IS407A_A   | R   | Bm_fmh        | 2  | 1080393-1081628 | Chr2   | IS407A        | GACAG TGACCTGCCCCC~TAC ATGAAGAAGCGCTTTACGCGCCCGCAAGCCAAACGCG; TGTTGGCCAGGGACTTTGCTAGAA(CGGACG. CGCC   |                   |               |       |        | CGCC  |       | N             |
| 8*Chr2_55_IS407A_A                    | D-R | Bm_200272128  | 8  | 108421-109656   | Chr2   | IS407A        | AGCGT(TGACCTGCCCCC~TAC ATGAAGAAGCGCTTTACGCGCCCGCAAGCCAAACGCG; TGTTGGCCAGGGACTTTGCTAGAA(GGAGTT CIGCCC  |                   |               |       |        | GGAG  |       | N             |
| 10*Chr2_46_IS407A_C                   | N   | Bm_PRL20      | 10 | 1091241-1092476 | Chr2   | IS407A        | GCCGA TGACCTGCCCCC~TAC ATGAAGAAGCGCTTTACGCGCCCGCAAGCCAAACGCG; TGTTGGCCAGGGACTTTGCTAGAA(CAGCAGA' CAGC  |                   |               |       |        | CAGC  |       | Y             |
| 4*Chr2_45_IS407A_B                    | N   | Bm_gb8_horse_ | 4  | 1091459-1092694 | Chr2   | IS407A        | GCCGC TGACCTGCCCCC~TAC ATGAAGAAGCGCTTTACGCGCCCGCAAGCCAAACGCG; TGTTGGCCAGGGACTTTGCTAGAA(GAAAGCG GGCG   |                   |               |       |        | GAAA  |       | N             |
| 3*Chr2_51_IS407A_A                    | N   | Bm_JHU        | 3  | 1092993-1094228 | Chr2   | IS407A        | GCCGC TGACCTGCCCCC~TAC ATGAAGAAGCGCTTTACGCGCCCGCAAGCCAAACGCG; TGTTGGCCAGGGACTTTGCTAGAA(GCGGCC GGCG    |                   |               |       |        | GGCG  |       | Y             |
| 5*Chr2_40_IS407A 5*Chr2_41_IS407A_B   | D   | Bm_ATCC_1039  | 5  | 1093117-1094352 | Chr2   | IS407A        | GAAAG TGACCTGCCCCC~TAC ATGAAGAAGCGCTTTACGCGCCCGCAAGCCAAACGCG; TGTTGGCCAGGGACTTTGCTAGAA(GCAACTG AGGC   |                   |               |       |        | CGAA  |       | N             |
| 1*Chr2_45_IS407A_B                    | N   | Bm_ATCC_2334  | 1  | 1096730-1097965 | Chr2   | IS407A        | GCCGC TGACCTGCCCCC~TAC ATGAAGAAGCGCTTTACGCGCCCGCAAGCCAAACGCG; TGTTGGCCAGGGACTTTGCTAGAA(GAAAGCG GGCG   |                   |               |       |        | GAAA  |       | N             |
| 10*Chr2_2_IS407A 10*Chr2_73_IS407A_A  | D-R | Bm_PRL20      | 10 | 111417-112652   | Chr2   | IS407A        | CGTGTGACCTGCCCCC~TAC ATGAAGAAGCGCTTTACGCGCCCGCAAGCCAAACGCG; TGTTGGCCAGGGACTTTGCTAGAA(CAACGCA' GTGT    |                   |               |       |        | CAAC  |       | N             |
| 3*Chr2_49_IS407A_A                    | N   | Bm_JHU        | 3  | 1114839-1116074 | Chr2   | IS407A        | CCCAA(TGACCTGCCCCC~TAC ATGAAGAAGCGCTTTACGCGCCCGCAAGCCAAACGCG; TGTTGGCCAGGGACTTTGCTAGAA(AGCGACG CCCA   |                   |               |       |        | AGCG  |       | N             |
| 2*Chr2_45_IS407A_B                    | N   | Bm_fmh        | 2  | 1115369-1116604 | Chr2   | IS407A        | GCCGC TGACCTGCCCCC~TAC ATGAAGAAGCGCTTTACGCGCCCGCAAGCCAAACGCG; TGTTGGCCAGGGACTTTGCTAGAA(GAAAGCG GGCG   |                   |               |       |        | GAAA  |       | N             |
| 2*Chr2_72_IS407A_A                    | N   | Bm_fmh        | 2  | 112416-113651   | Chr2   | IS407A        | CACAT(TGACCTGCCCCC~TAC ATGAAGAAGCGCTTTACGCGCCCGCAAGCCAAACGCG; TGTTGGCCAGGGACTTTGCTAGAA(GATGGAT/ GATG  |                   |               |       |        | GATG  |       | Y             |
| 6*Chr2_15a_IS407/6*Chr2_18_IS407A_A   | D-R | Bm_NCTC_102   | 6  | 1128849-1130084 | Chr2   | IS407A        | AGACC TGACCTGCCCCC~TAC ATGAAGAAGCGCTTTACGCGCCCGCAAGCCAAACGCG; TGTTGGCCAGGGACTTTGCTAGAA(GGATCAG/ AGAT  |                   |               |       |        | GGAT  |       | N             |
| 10*Chr2_44a_IS40/10*Chr2_48_IS407A_A  | D-R | Bm_PRL20      | 10 | 1135654-1136889 | Chr2   | IS407A        | CGATC(TGACCTGCCCCC~TAC ATGAAGAAGCGCTTTACGCGCCCGCAAGCCAAACGCG; TGTTGGCCAGGGACTTTGCTAGAA(AGGGGTA. GCGG  |                   |               |       |        | AGGG  |       | N             |

|                                       |     |              |    |                 |      |        |                                                                                                         |      |      |
|---------------------------------------|-----|--------------|----|-----------------|------|--------|---------------------------------------------------------------------------------------------------------|------|------|
| 3*Chr2_72_IS407A_A                    | N   | Bm_JHU       | 3  | 113583-114818   | Chr2 | IS407A | CACATGTGACCTGCCCC~TAC ATGAAGAAGCGCTTTACGCGCCCGCAAGCCAAACGCG; TGTTGGCCAGGGACTTTGCTAGAA( GATGGAT/ GATG    | GATG | Y    |
| 3*Chr2_44b_IS407;3*Chr2_48_IS407A_A   | D-R | Bm_JHU       | 3  | 1143190-1144425 | Chr2 | IS407A | GACAG TGACCTGCCCC~TAC ATGAAGAAGCGCTTTACGCGCCCGCAAGCCAAACGCG; TGTTGGCCAGGGACTTTGCTAGAA( CGGCAGC/ CGCC    | CGGC | N    |
| 7*Chr2_44a_IS407A_A                   | N   | Bm_NCTC_102  | 7  | 1145841-1147076 | Chr2 | IS407A | GACAG TGACCTGCCCC~TAC ATGAAGAAGCGCTTTACGCGCCCGCAAGCCAAACGCG; TGTTGGCCAGGGACTTTGCTAGAA( AGGGGTA/ CGCC    | AGGG | N    |
| 5*Chr2_33_IS407A 5*Chr2_38_IS407A_A   | D-R | Bm_ATCC_103  | 5  | 1160971-1162206 | Chr2 | IS407A | GTCCA TGACCTGCCCC~TAC ATGAAGAAGCGCTTTACGCGCCCGCAAGCCAAACGCG; TGTTGGCCAGGGACTTTGCTAGAA( GTCCAGC/ GAAC    | GTCC | N    |
| 3*Chr2_45_IS407A_B                    | N   | Bm_JHU       | 3  | 1178167-1179402 | Chr2 | IS407A | GCCGC TGACCTGCCCC~TAC ATGAAGAAGCGCTTTACGCGCCCGCAAGCCAAACGCG; TGTTGGCCAGGGACTTTGCTAGAA( GAAAGCG/ GGGC    | GAAA | N    |
| 9*Chr2_44a_IS407A_A                   | R   | Bm_SAVP1     | 9  | 117856-119091   | Chr2 | IS407A | CGATG TGACCTGCCCC~TAC ATGAAGAAGCGCTTTACGCGCCCGCAAGCCAAACGCG; TGTTGGCCAGGGACTTTGCTAGAA( AGGGTA/ GCGG     | AGGG | N    |
| 8*Chr2_6_IS407A_A                     | N   | Bm_200272128 | 8  | 1188221-1189456 | Chr2 | IS407A | GCGCA TGACCTGCCCC~TAC ATGAAGAAGCGCTTTACGCGCCCGCAAGCCAAACGCG; TGTTGGCCAGGGACTTTGCTAGAA( CTGGAAC/ CGTG    | CGTG | Y    |
| 8*Chr2_13b_IS407;8*Chr2_57b_IS407A_A  | R   | Bm_200272128 | 8  | 1194967-1196202 | Chr2 | IS407A | CAAGC TGACCTGCCCC~TAC ATGAAGAAGCGCTTTACGCGCCCGCAAGCCAAACGCG; TGTTGGCCAGGGACTTTGCTAGAA( APTTCCCG/ GGTT   | ATCT | N    |
| 5*Chr2_31b_IS407A_A                   | R   | Bm_ATCC_103  | 5  | 1198234-1199469 | Chr2 | IS407A | GAACG TGACCTGCCCC~TAC ATGAAGAAGCGCTTTACGCGCCCGCAAGCCAAACGCG; TGTTGGCCAGGGACTTTGCTAGAA( GGAGTTC/ GATC    | GGAG | N    |
| 5*Chr2_13a_IS407A_A                   | R   | Bm_ATCC_103  | 5  | 1200293-1201483 | Chr2 | IS407A | GAGCC TGACCTGCCCC~TAC ATGAAGAAGCGCTTTACGCGCCCGCAAGCCAAACGCG; TGTTGGCCAGNNNNNNNNNNNN#                    | #    | N.D. |
| 5*Chr2_10a_IS407A_A                   | N   | Bm_ATCC_103  | 5  | 1214324-1215557 | Chr2 | IS407A | CGCGC TGACCTGCCCC~TAC ATGAAGAAGCGCTTTACGCGCCCGCAAGCCAAACGCG; TGTTGGCCAGGGACTTTGCTAGAA( TCAGCC/ GCTT     | TCAC | N    |
| 4*Chr2_27_IS407A 4*Chr2_44a_IS407A_A  | D-R | Bm_gb8_horse | 4  | 1219713-1220948 | Chr2 | IS407A | CTGGC TGACCTGCCCC~TAC ATGAAGAAGCGCTTTACGCGCCCGCAAGCCAAACGCG; TGTTGGCCAGGGACTTTGCTAGAA( AGGGGTA/ CGAG    | AGGG | N    |
| 1*Chr2_27_IS407A 1*Chr2_44a_IS407A_A  | D-R | Bm_ATCC_233  | 1  | 1225576-1226811 | Chr2 | IS407A | CTGGC TGACCTGCCCC~TAC ATGAAGAAGCGCTTTACGCGCCCGCAAGCCAAACGCG; TGTTGGCCAGGGACTTTGCTAGAA( AGGGGTA/ CGAG    | AGGG | N    |
| 5*Chr2_9b_IS407A 5*Chr2_31a_IS407A_A  | R   | Bm_ATCC_103  | 5  | 1236549-1237784 | Chr2 | IS407A | CATGC TGACCTGCCCC~TAC ATGAAGAAGCGCTTTACGCGCCCGCAAGCCAAACGCG; TGTTGGCCAGGGACTTTGCTAGAA( GATCGAG/ CAAG    | GATC | N    |
| 10*Chr2_42_IS407A_A                   | N   | Bm_PRL20     | 10 | 1242592-1243827 | Chr2 | IS407A | ATCGA TGACCTGCCCC~TAC ATGAAGAAGCGCTTTACGCGCCCGCAAGCCAAACGCG; TGTTGGCCAGGGACTTTGCTAGAA( CTGCGGC/ CTGC    | CTGC | Y    |
| 9*Chr2_2_IS407A 9*Chr2_73_IS407A_A    | D-R | Bm_SAVP1     | 9  | 1244526-1245761 | Chr2 | IS407A | CGCTG TGACCTGCCCC~TAC ATGAAGAAGCGCTTTACGCGCCCGCAAGCCAAACGCG; TGTTGGCCAGGGACTTTGCTAGAA( CAACGCA/ GTGT    | CAAC | N    |
| 2*Chr2_27_IS407A 2*Chr2_44a_IS407A_A  | D-R | Bm_fmh       | 2  | 1246300-1247535 | Chr2 | IS407A | CTGGC TGACCTGCCCC~TAC ATGAAGAAGCGCTTTACGCGCCCGCAAGCCAAACGCG; TGTTGGCCAGGGACTTTGCTAGAA( AGGGGTA/ CGAG    | AGGG | N    |
| 5*Chr2_70_IS407A_A                    | N   | Bm_ATCC_103  | 5  | 125421-126656   | Chr2 | IS407A | CAACA TGACCTGCCCC~TAC ATGAAGAAGCGCTTTACGCGCCCGCAAGCCAAACGCG; TGTTGGCCAGGGACTTTGCTAGAA( GTACCC/ GTAC     | GTAC | Y    |
| 7*Chr2_48_IS407A_A                    | N   | Bm_NCTC_102  | 7  | 1257060-1258295 | Chr2 | IS407A | CATTC TGACCTGCCCC~TAC ATGAAGAAGCGCTTTACGCGCCCGCAAGCCAAACGCG; TGTTGGCCAGGGACTTTGCTAGAA( GCCGTC/ CGCC     | GCCG | Y    |
| 9*Chr2_72_IS407A_A                    | N   | Bm_SAVP1     | 9  | 1267326-1268561 | Chr2 | IS407A | CACAT TGACCTGCCCC~TAC ATGAAGAAGCGCTTTACGCGCCCGCAAGCCAAACGCG; TGTTGGCCAGGGACTTTGCTAGAA( GATGTA/ GATG     | GATG | Y    |
| 7*Chr2_49_IS407A_A                    | N   | Bm_NCTC_102  | 7  | 1284838-1286073 | Chr2 | IS407A | GCCGAC TGACCTGCCCC~TAC ATGAAGAAGCGCTTTACGCGCCCGCAAGCCAAACGCG; TGTTGGCCAGGGACTTTGCTAGAA( AGCGAC/ AGCG    | AGCG | Y    |
| 5*Chr2_26_IS407A 5*Chr2_27_IS407A_A   | D   | Bm_ATCC_103  | 5  | 1298656-1299890 | Chr2 | IS407A | CTGGC TGACCTGCCCC~TAC ATGAAGAAGCGCTTTACGCGCCCGCAAGCCAAACGCG; TGTTGGCCAGGGACTTTGCTAGAA( CTGGATA/ CGAG    | CTGG | N    |
| 7*Chr2_51_IS407A_A                    | N   | Bm_NCTC_102  | 7  | 1306894-1308129 | Chr2 | IS407A | CGGCC TGACCTGCCCC~TAC ATGAAGAAGCGCTTTACGCGCCCGCAAGCCAAACGCG; TGTTGGCCAGGGACTTTGCTAGAA( GTCGCGC/ GGCG    | GGCG | Y    |
| 6*Chr2_3_IS407A 6*Chr2_76_IS407A_A    | D-R | Bm_NCTC_102  | 6  | 1307203-1308438 | Chr2 | IS407A | GGGCA TGACCTGCCCC~TAC ATGAAGAAGCGCTTTACGCGCCCGCAAGCCAAACGCG; TGTTGGCCAGGGACTTTGCTAGAA( TCTCCTT/ GATG    | TCTT | N    |
| 3*Chr2_27_IS407A_A                    | D-R | Bm_JHU       | 3  | 1310457-1311650 | Chr2 | IS407A | CTGGC TGACCTGCCCC~TAC ATGAAGAAGCGCTTTACGCGCCCGCAAGCCAAACGCG; TGTTGGCCAGGGACTTTGCTAGAA( #contig_br/ CGAG | #con | N    |
| 3*Chr2_42_IS407A_A                    | D-R | Bm_JHU       | 3  | 1311687-1312631 | Chr2 | IS407A | #contig ~~~~~~ GCCCGCAAGCCAAACGCG; TGTTGGCCAGGGACTTTGCTAGAA( CTGCGGC/ reak                              | CTGC | N    |
| 4*Chr2_42_IS407A_A                    | N   | Bm_gb8_horse | 4  | 1318264-1319499 | Chr2 | IS407A | ATCGA TGACCTGCCCC~TAC ATGAAGAAGCGCTTTACGCGCCCGCAAGCCAAACGCG; TGTTGGCCAGGGACTTTGCTAGAA( CTGCGGC/ CTGC    | CTGC | Y    |
| 10*Chr2_70_IS407A 10*Chr2_76_IS407A_A | D-R | Bm_PRL20     | 10 | 132158-133393   | Chr2 | IS407A | CAACA TGACCTGCCCC~TAC ATGAAGAAGCGCTTTACGCGCCCGCAAGCCAAACGCG; TGTTGGCCAGGGACTTTGCTAGAA( TCTCCTT/ GTAC    | TCTT | N    |
| 1*Chr2_42_IS407A_A                    | N   | Bm_ATCC_233  | 1  | 1324421-1325656 | Chr2 | IS407A | ATCGA TGACCTGCCCC~TAC ATGAAGAAGCGCTTTACGCGCCCGCAAGCCAAACGCG; TGTTGGCCAGGGACTTTGCTAGAA( CTGCGGC/ CTGC    | CTGC | Y    |
| 10*Chr2_40_IS407A 10*Chr2_41_IS407A_B | D   | Bm_PRL20     | 10 | 1330658-1331893 | Chr2 | IS407A | GAAGG TGACCTGCCCC~TAC ATGAAGAAGCGCTTTACGCGCCCGCAAGCCAAACGCG; TGTTGGCCAGGGACTTTGCTAGAA( CGAACTG/ AGCG    | CGAA | N    |
| 9*Chr2_70_IS407A_A                    | N   | Bm_SAVP1     | 9  | 1334773-1336008 | Chr2 | IS407A | CAACA TGACCTGCCCC~TAC ATGAAGAAGCGCTTTACGCGCCCGCAAGCCAAACGCG; TGTTGGCCAGGGACTTTGCTAGAA( ATCCGCA/ GTAC    | GTAC | Y    |
| 8*Chr2_58_IS407A_A                    | N   | Bm_200272128 | 8  | 1343603-1344838 | Chr2 | IS407A | CGCGG TGACCTGCCCC~TAC ATGAAGAAGCGCTTTACGCGCCCGCAAGCCAAACGCG; TGTTGGCCAGGGACTTTGCTAGAA( ATCCGGC/ CGAC    | ATCC | N    |
| 8*Chr2_34_IS407A 8*Chr2_54_IS407A_A   | D-R | Bm_200272128 | 8  | 134525-135760   | Chr2 | IS407A | CGCGG TGACCTGCCCC~TAC ATGAAGAAGCGCTTTACGCGCCCGCAAGCCAAACGCG; TGTTGGCCAGGGACTTTGCTAGAA( GGATAGA/ GAGG    | GGAT | N    |
| 2*Chr2_42_IS407A_A                    | N   | Bm_fmh       | 2  | 1349579-1350814 | Chr2 | IS407A | ATCGA TGACCTGCCCC~TAC ATGAAGAAGCGCTTTACGCGCCCGCAAGCCAAACGCG; TGTTGGCCAGGGACTTTGCTAGAA( CTGCGGC/ CTGC    | CTGC | Y    |
| 7*Chr2_52_IS407A_A                    | N   | Bm_NCTC_102  | 7  | 1386349-1387584 | Chr2 | IS407A | GAAAT TGACCTGCCCC~TAC ATGAAGAAGCGCTTTACGCGCCCGCAAGCCAAACGCG; TGTTGGCCAGGGACTTTGCTAGAA( CGTCAAG/ GGAT    | CGTC | N    |
| 5*Chr2_51_IS407A_A                    | N   | Bm_ATCC_103  | 5  | 1390265-1391500 | Chr2 | IS407A | CGGCC TGACCTGCCCC~TAC ATGAAGAAGCGCTTTACGCGCCCGCAAGCCAAACGCG; TGTTGGCCAGGGACTTTGCTAGAA( GCGCGCC/ GGCG    | GGCG | Y    |
| 3*Chr2_40_IS407A 3*Chr2_41_IS407A_B   | D   | Bm_JHU       | 3  | 1401133-1402368 | Chr2 | IS407A | GAAGG TGACCTGCCCC~TAC ATGAAGAAGCGCTTTACGCGCCCGCAAGCCAAACGCG; TGTTGGCCAGGGACTTTGCTAGAA( CGAACTG/ AGCG    | CGAA | N    |
| 4*Chr2_27_IS407A 4*Chr2_41_IS407A_B   | D   | Bm_gb8_horse | 4  | 1406420-1407655 | Chr2 | IS407A | GAAGG TGACCTGCCCC~TAC ATGAAGAAGCGCTTTACGCGCCCGCAAGCCAAACGCG; TGTTGGCCAGGGACTTTGCTAGAA( CGAACTG/ AGCG    | CGAA | N    |
| 5*Chr2_49_IS407A_A                    | N   | Bm_ATCC_103  | 5  | 1410524-1411759 | Chr2 | IS407A | CCCAA TGACCTGCCCC~TAC ATGAAGAAGCGCTTTACGCGCCCGCAAGCCAAACGCG; TGTTGGCCAGGGACTTTGCTAGAA( AGCGAC/ CCGA     | AGCG | N    |
| 7*Chr2_33_IS407A 7*Chr2_53_IS407A_A   | D-R | Bm_NCTC_102  | 7  | 1411874-1413109 | Chr2 | IS407A | GTGCC TGACCTGCCCC~TAC ATGAAGAAGCGCTTTACGCGCCCGCAAGCCAAACGCG; TGTTGGCCAGGGACTTTGCTAGAA( GTCCAGC/ ACGG    | GTCC | N    |
| 1*Chr2_40_IS407A 1*Chr2_41_IS407A_B   | D   | Bm_ATCC_233  | 1  | 1412717-1413952 | Chr2 | IS407A | GAAAG TGACCTGCCCC~TAC ATGAAGAAGCGCTTTACGCGCCCGCAAGCCAAACGCG; TGTTGGCCAGGGACTTTGCTAGAA( CGAACTG/ AGCG    | CGAA | N    |
| 6*Chr2_33_IS407A 6*Chr2_53_IS407A_A   | D-R | Bm_NCTC_102  | 6  | 142183-143418   | Chr2 | IS407A | GTGCC TGACCTGCCCC~TAC ATGAAGAAGCGCTTTACGCGCCCGCAAGCCAAACGCG; TGTTGGCCAGGGACTTTGCTAGAA( GTCCAGC/ ACGG    | GTCC | N    |
| 9*Chr2_67_IS407A 9*Chr2_68_IS407A_A   | N   | Bm_SAVP1     | 9  | 1432613-1433848 | Chr2 | IS407A | CAGCG TGACCTGCCCC~TAC ATGAAGAAGCGCTTTACGCGCCCGCAAGCCAAACGCG; TGTTGGCCAGGGACTTTGCTAGAA( CCTGCCC/ GGTC    | CCCT | N    |
| 5*Chr2_24_IS407A 5*Chr2_48_IS407A_A   | D-R | Bm_ATCC_103  | 5  | 1438414-1439649 | Chr2 | IS407A | CGGGA TGACCTGCCCC~TAC ATGAAGAAGCGCTTTACGCGCCCGCAAGCCAAACGCG; TGTTGGCCAGGGACTTTGCTAGAA( CGGCAGC/ CCAC    | CGGC | N    |
| 2*Chr2_40_IS407A 2*Chr2_41_IS407A_B   | D   | Bm_fmh       | 2  | 1439497-1440732 | Chr2 | IS407A | GAAGG TGACCTGCCCC~TAC ATGAAGAAGCGCTTTACGCGCCCGCAAGCCAAACGCG; TGTTGGCCAGGGACTTTGCTAGAA( CGAACTG/ AGCG    | CGAA | N    |
| 7*Chr2_28_IS407A 7*Chr2_31b_IS407A_A  | D   | Bm_NCTC_102  | 7  | 1449126-1450361 | Chr2 | IS407A | GAAAG TGACCTGCCCC~TAC ATGAAGAAGCGCTTTACGCGCCCGCAAGCCAAACGCG; TGTTGGCCAGGGACTTTGCTAGAA( CGATGCT/ GATC    | CGAT | N    |
| 8*Chr2_59_IS407A_A                    | N   | Bm_200272128 | 8  | 1453446-1454681 | Chr2 | IS407A | CGCGC TGACCTGCCCC~TAC ATGAAGAAGCGCTTTACGCGCCCGCAAGCCAAACGCG; TGTTGGCCAGGGACTTTGCTAGAA( GCGCGAT/ GTGC    | GGCG | N    |
| 5*Chr2_52_IS407A_A                    | N   | Bm_ATCC_103  | 5  | 1465100-1466335 | Chr2 | IS407A | GAAAT TGACCTGCCCC~TAC ATGAAGAAGCGCTTTACGCGCCCGCAAGCCAAACGCG; TGTTGGCCAGGGACTTTGCTAGAA( CCTCAG/ GGAT     | CCGT | N    |
| 3*Chr2_33_IS407A 3*Chr2_38_IS407A_A   | D-R | Bm_JHU       | 3  | 1468774-1470009 | Chr2 | IS407A | GTCCA TGACCTGCCCC~TAC ATGAAGAAGCGCTTTACGCGCCCGCAAGCCAAACGCG; TGTTGGCCAGGGACTTTGCTAGAA( GTCCAGC/ GAAC    | GTCC | N    |
| 4*Chr2_33_IS407A 4*Chr2_38_IS407A_A   | D-R | Bm_gb8_horse | 4  | 1474062-1475297 | Chr2 | IS407A | GTCCA TGACCTGCCCC~TAC ATGAAGAAGCGCTTTACGCGCCCGCAAGCCAAACGCG; TGTTGGCCAGGGACTTTGCTAGAA( GTCCAGC/ GAAC    | GTCC | N    |
| 8*Chr2_60_IS407A 8*Chr2_61_IS407A_A   | D   | Bm_200272128 | 8  | 1474566-1475801 | Chr2 | IS407A | CGCCG TGACCTGCCCC~TAC ATGAAGAAGCGCTTTACGCGCCCGCAAGCCAAACGCG; TGTTGGCCAGGGACTTTGCTAGAA( CTCAGC/ GTGC     | CGAC | N    |
| 1*Chr2_33_IS407A 1*Chr2_38_IS407A_A   | D-R | Bm_ATCC_233  | 1  | 1480359-1481594 | Chr2 | IS407A | GTCCA TGACCTGCCCC~TAC ATGAAGAAGCGCTTTACGCGCCCGCAAGCCAAACGCG; TGTTGGCCAGGGACTTTGCTAGAA( GTCCAGC/ GAAC    | GTCC | N    |
| 5*Chr2_9a_IS407A 5*Chr2_53_IS407A_A   | D-R | Bm_ATCC_103  | 5  | 1489755-1490990 | Chr2 | IS407A | GCGCA TGACCTGCCCC~TAC ATGAAGAAGCGCTTTACGCGCCCGCAAGCCAAACGCG; TGTTGGCCAGGGACTTTGCTAGAA( CACGAG/ CATC     | CAAG | N    |
| 9*Chr2_62b_IS407;9*Chr2_75_IS407A_A   | D-R | Bm_SAVP1     | 9  | 1496137-1497372 | Chr2 | IS407A | CTAGA TGACCTGCCCC~TAC ATGAAGAAGCGCTTTACGCGCCCGCAAGCCAAACGCG; TGTTGGCCAGGGACTTTGCTAGAA( CACGTC/ GATC     | CACG | N    |
| 7*Chr2_26_IS407A 7*Chr2_27_IS407A_A   | D   | Bm_NCTC_102  | 7  | 1497556-1498791 | Chr2 | IS407A | GGTTT TGACCTGCCCC~TAC ATGAAGAAGCGCTTTACGCGCCCGCAAGCCAAACGCG; TGTTGGCCAGGGACTTTGCTAGAA( CTCGGCC/ GTGC    | CTCG | N    |
| 8*Chr2_62a_IS407;8*Chr2_74_IS407A_A   | D-R | Bm_200272128 | 8  | 1498717-1499952 | Chr2 | IS407A | CCATC TGACCTGCCCC~TAC ATGAAGAAGCGCTTTACGCGCCCGCAAGCCAAACGCG; TGTTGGCCAGGGACTTTGCTAGAA( CGGCTTC/ TGAT    | CGGC | N    |
| 10*Chr2_6_IS407A_A                    | N   | Bm_PRL20     | 10 | 1504574-1505809 | Chr2 | IS407A | GCGCA TGACCTGCCCC~TAC ATGAAGAAGCGCTTTACGCGCCCGCAAGCCAAACGCG; TGTTGGCCAGGGACTTTGCTAGAA( CGTGAAC/ CGTG    | CGTG | Y    |
| 3*Chr2_9a_IS407A 3*Chr2_31b_IS407A_A  | D-R | Bm_JHU       | 3  | 1506899-1508134 | Chr2 | IS407A | GAAAG TGACCTGCCCC~TAC ATGAAGAAGCGCTTTACGCGCCCGCAAGCCAAACGCG; TGTTGGCCAGGGACTTTGCTAGAA( CAAGCAG/ GATC    | CAAG | N    |

|                                         |     |              |    |                 |      |        |                                                                                                    |      |      |
|-----------------------------------------|-----|--------------|----|-----------------|------|--------|----------------------------------------------------------------------------------------------------|------|------|
| 2*Chr2_33_IS407A,2*Chr2_38_IS407A_A     | D-R | Bm_fmh       | 2  | 1507138-1508373 | Chr2 | IS407A | GTCCA TGACCTGCCCC~TAC ATGAAGAAGCGCTTTACGCGCCCGCAAGCCAAACGCG;TGTTGGCCAGGGACTTTGCTAGAA(GTCCAGC GAAC  | GTCC | N    |
| 4*Chr2_9a_IS407A,4*Chr2_31b_IS407A_A    | D-R | Bm_gb8_horse | 4  | 1511310-1512545 | Chr2 | IS407A | GAACG TGACCTGCCCC~TAC ATGAAGAAGCGCTTTACGCGCCCGCAAGCCAAACGCG;TGTTGGCCAGGGACTTTGCTAGAA(CAAGCAG GATC  | CAAG | N    |
| 10*Chr2_13b_IS407A,10*Chr2_57b_IS407A_A | R   | Bm_PRL20     | 10 | 1511320-1512555 | Chr2 | IS407A | CAAGC TGACCTGCCCC~TAC ATGAAGAAGCGCTTTACGCGCCCGCAAGCCAAACGCG;TGTTGGCCAGGGACTTTGCTAGAA(ATCTTCCC GGTT | ATCT | N    |
| 1*Chr2_9a_IS407A,1*Chr2_31b_IS407A_A    | D-R | Bm_ATCC_233  | 1  | 1517607-1518842 | Chr2 | IS407A | GAACG TGACCTGCCCC~TAC ATGAAGAAGCGCTTTACGCGCCCGCAAGCCAAACGCG;TGTTGGCCAGGGACTTTGCTAGAA(CAAGCAG GATC  | CAAG | N    |
| 5*Chr2_8_IS407A_C                       | N   | Bm_ATCC_103  | 5  | 1523165-1524400 | Chr2 | IS407A | CGCAG TGACCTGCCCC~TAC ATGAAGAAGCGCTTTACGCGCCCGCAAGCCAAACGCG;TGTTGGCCAGGGACTTTGCTAGAA(CATTGCC CAT   | CATT | Y    |
| 6*Chr2_1_IS407A_B                       | N   | Bm_NCTC_102  | 6  | 1531434-1532669 | Chr2 | IS407A | CCAGA TGACCTGCCCC~TAC ATGAAGAAGCGCTTTACGCGCCCGCAAGCCAAACGCG;TGTTGGCCAGGGACTTTGCTAGAA(CGGCGAA CGGC  | CGGC | Y    |
| 7*Chr2_24_IS407A,7*Chr2_56_IS407A_A     | D-R | Bm_NCTC_102  | 7  | 1533196-1534431 | Chr2 | IS407A | CGGGA TGACCTGCCCC~TAC ATGAAGAAGCGCTTTACGCGCCCGCAAGCCAAACGCG;TGTTGGCCAGGGACTTTGCTAGAA(CATCGGC CCAC  | CATC | N    |
| 2*Chr2_9a_IS407A,2*Chr2_31b_IS407A_A    | D-R | Bm_fmh       | 2  | 1544910-1546145 | Chr2 | IS407A | GAACG TGACCTGCCCC~TAC ATGAAGAAGCGCTTTACGCGCCCGCAAGCCAAACGCG;TGTTGGCCAGGGACTTTGCTAGAA(CAAGCAG GATC  | CAAG | N    |
| 9*Chr2_60_IS407A,9*Chr2_74_IS407A_A     | D-R | Bm_SAVP1     | 9  | 1575233-1576468 | Chr2 | IS407A | CGCCG TGACCTGCCCC~TAC ATGAAGAAGCGCTTTACGCGCCCGCAAGCCAAACGCG;TGTTGGCCAGGGACTTTGCTAGAA(CGGCTTCC CGTG | CGGC | N    |
| 6*Chr2_2_IS407A,6*Chr2_73_IS407A_A      | D-R | Bm_NCTC_102  | 6  | 1576904-1578139 | Chr2 | IS407A | CGCTG TGACCTGCCCC~TAC ATGAAGAAGCGCTTTACGCGCCCGCAAGCCAAACGCG;TGTTGGCCAGGGACTTTGCTAGAA(CAACGCA GTGT  | CAAC | N    |
| 8*Chr2_62b_IS407A,8*Chr2_75_IS407A_A    | D-R | Bm_200272128 | 8  | 1577349-1578382 | Chr2 | IS407A | #IS407A ~~~~~ GCCCGCAAGCCAAACGCG;TGTTGGCCAGGGACTTTGCTAGAA(GTCCAGC IS407A?                          | GTCC | N.D. |
| 9*Chr2_59_IS407A_A                      | N   | Bm_SAVP1     | 9  | 1596353-1597588 | Chr2 | IS407A | CGCGC TGACCTGCCCC~TAC ATGAAGAAGCGCTTTACGCGCCCGCAAGCCAAACGCG;TGTTGGCCAGGGACTTTGCTAGAA(GCCGGAT GTGC  | GGCG | N    |
| 6*Chr2_70_IS407A,6*Chr2_72_IS407A_A     | D-R | Bm_NCTC_102  | 6  | 1599659-1600894 | Chr2 | IS407A | CAACA TGACCTGCCCC~TAC ATGAAGAAGCGCTTTACGCGCCCGCAAGCCAAACGCG;TGTTGGCCAGGGACTTTGCTAGAA(GATGGAT GTAC  | GATG | N    |
| 5*Chr2_13b_IS407,5*Chr2_57b_IS407A_A    | R   | Bm_ATCC_103  | 5  | 1605359-1606594 | Chr2 | IS407A | TATCG TGACCTGCCCC~TAC ATGAAGAAGCGCTTTACGCGCCCGCAAGCCAAACGCG;TGTTGGCCAGGGACTTTGCTAGAA(AACCCAA AGAT  | AACC | N    |
| 8*Chr2_66_IS407A,8*Chr2_70_IS407A_A     | D-R | Bm_200272128 | 8  | 1608602-1609837 | Chr2 | IS407A | TCAGT TGACCTGCCCC~TAC ATGAAGAAGCGCTTTACGCGCCCGCAAGCCAAACGCG;TGTTGGCCAGGGACTTTGCTAGAA(GTACC CGTG    | GTAC | N    |
| 4*Chr2_6_IS407A_A                       | N   | Bm_gb8_horse | 4  | 1629828-1631063 | Chr2 | IS407A | GCGCA TGACCTGCCCC~TAC ATGAAGAAGCGCTTTACGCGCCCGCAAGCCAAACGCG;TGTTGGCCAGGGACTTTGCTAGAA(CGTGAAC CGTG  | CGTG | Y    |
| 3*Chr2_6_IS407A_A                       | N   | Bm_JHU       | 3  | 1631118-1632353 | Chr2 | IS407A | GCGCA TGACCTGCCCC~TAC ATGAAGAAGCGCTTTACGCGCCCGCAAGCCAAACGCG;TGTTGGCCAGGGACTTTGCTAGAA(CGTGAAC CGTG  | CGTG | Y    |
| 1*Chr2_6_IS407A_A                       | N   | Bm_ATCC_233  | 1  | 1636309-1637544 | Chr2 | IS407A | GCGCA TGACCTGCCCC~TAC ATGAAGAAGCGCTTTACGCGCCCGCAAGCCAAACGCG;TGTTGGCCAGGGACTTTGCTAGAA(CGTGAAC CGTG  | CGTG | Y    |
| 4*Chr2_13b_IS407,4*Chr2_57b_IS407A_A    | R   | Bm_gb8_horse | 4  | 1636577-1637812 | Chr2 | IS407A | GCGAG TGACCTGCCCC~TAC ATGAAGAAGCGCTTTACGCGCCCGCAAGCCAAACGCG;TGTTGGCCAGGGACTTTGCTAGAA(AACCCAA TCGG  | AACC | N    |
| 3*Chr2_13b_IS407,3*Chr2_57b_IS407A_A    | R   | Bm_JHU       | 3  | 1637867-1639102 | Chr2 | IS407A | CGCAG TGACCTGCCCC~TAC ATGAAGAAGCGCTTTACGCGCCCGCAAGCCAAACGCG;TGTTGGCCAGGGACTTTGCTAGAA(AACCCAA TCGG  | AACC | N    |
| 7*Chr2_37_IS407A,7*Chr2_57a_IS407A_A    | D-R | Bm_NCTC_102  | 7  | 1637908-1639143 | Chr2 | IS407A | CCCTT TGACCTGCCCC~TAC ATGAAGAAGCGCTTTACGCGCCCGCAAGCCAAACGCG;TGTTGGCCAGGGACTTTGCTAGAA(CGCCG ACCT    | CGCC | N    |
| 1*Chr2_13b_IS407,1*Chr2_57b_IS407A_A    | R   | Bm_ATCC_233  | 1  | 1643058-1644293 | Chr2 | IS407A | GCGAG TGACCTGCCCC~TAC ATGAAGAAGCGCTTTACGCGCCCGCAAGCCAAACGCG;TGTTGGCCAGGGACTTTGCTAGAA(AACCCAA TCGG  | AACC | N    |
| 10*Chr2_58_IS407A_A                     | N   | Bm_PRL20     | 10 | 1657072-1658307 | Chr2 | IS407A | GCCGG TGACCTGCCCC~TAC ATGAAGAAGCGCTTTACGCGCCCGCAAGCCAAACGCG;TGTTGGCCAGGGACTTTGCTAGAA(GTCCAGC GGAT  | GTCC | N    |
| 2*Chr2_6_IS407A_A                       | N   | Bm_fmh       | 2  | 1666791-1668026 | Chr2 | IS407A | GCGCA TGACCTGCCCC~TAC ATGAAGAAGCGCTTTACGCGCCCGCAAGCCAAACGCG;TGTTGGCCAGGGACTTTGCTAGAA(CGTGAAC CGTG  | CGTG | Y    |
| 2*Chr2_13b_IS407,2*Chr2_57b_IS407A_A    | R   | Bm_fmh       | 2  | 1673540-1674775 | Chr2 | IS407A | GCGAG TGACCTGCCCC~TAC ATGAAGAAGCGCTTTACGCGCCCGCAAGCCAAACGCG;TGTTGGCCAGGGACTTTGCTAGAA(AACCCAA TCGG  | AACC | N    |
| 8*Chr2_72_IS407A_A                      | N   | Bm_200272128 | 8  | 1675954-1677189 | Chr2 | IS407A | CACAT TGACCTGCCCC~TAC ATGAAGAAGCGCTTTACGCGCCCGCAAGCCAAACGCG;TGTTGGCCAGGGACTTTGCTAGAA(GATGGAT GATG  | GATG | Y    |
| 6*Chr2_52_IS407A_A                      | N   | Bm_NCTC_102  | 6  | 167708-168943   | Chr2 | IS407A | GAATT TGACCTGCCCC~TAC ATGAAGAAGCGCTTTACGCGCCCGCAAGCCAAACGCG;TGTTGGCCAGGGACTTTGCTAGAA(CCTCAGC GGAT  | CGCT | N    |
| 6*Chr2_17_IS407A,6*Chr2_68_IS407A_A     | N   | Bm_NCTC_102  | 6  | 1697435-1698670 | Chr2 | IS407A | CACGC TGACCTGCCCC~TAC ATGAAGAAGCGCTTTACGCGCCCGCAAGCCAAACGCG;TGTTGGCCAGGGACTTTGCTAGAA(CGGCCG GGTC   | CCCT | N    |
| 8*Chr2_2_IS407A,8*Chr2_73_IS407A_A      | D-R | Bm_200272128 | 8  | 1698785-1700020 | Chr2 | IS407A | CGTGT TGACCTGCCCC~TAC ATGAAGAAGCGCTTTACGCGCCCGCAAGCCAAACGCG;TGTTGGCCAGGGACTTTGCTAGAA(CAACGCA GTGT  | CAAC | N    |
| 4*Chr2_70_IS407A_A                      | N   | Bm_gb8_horse | 4  | 170287-171522   | Chr2 | IS407A | CAACA TGACCTGCCCC~TAC ATGAAGAAGCGCTTTACGCGCCCGCAAGCCAAACGCG;TGTTGGCCAGGGACTTTGCTAGAA(GTACC GTAC    | GTAC | Y    |
| 1*Chr2_70_IS407A_A                      | N   | Bm_ATCC_233  | 1  | 170594-171829   | Chr2 | IS407A | CAACA TGACCTGCCCC~TAC ATGAAGAAGCGCTTTACGCGCCCGCAAGCCAAACGCG;TGTTGGCCAGGGACTTTGCTAGAA(GTACC GTAC    | GTAC | Y    |
| 9*Chr2_58_IS407A_A                      | D-R | Bm_SAVP1     | 9  | 1705942-1707177 | Chr2 | IS407A | GTTAA TGACCTGCCCC~TAC ATGAAGAAGCGCTTTACGCGCCCGCAAGCCAAACGCG;TGTTGGCCAGGGACTTTGCTAGAA(GTCCAGC AGTG  | GTCC | N    |
| 9*Chr2_13a_IS407A_A                     | D-R | Bm_SAVP1     | 9  | 1716760-1717995 | Chr2 | IS407A | GAGCC TGACCTGCCCC~TAC ATGAAGAAGCGCTTTACGCGCCCGCAAGCCAAACGCG;TGTTGGCCAGGGACTTTGCTAGAA(CATCGC CTCG   | CATG | N    |
| 7*Chr2_35_IS407A_A                      | N   | Bm_NCTC_102  | 7  | 1717195-1718430 | Chr2 | IS407A | CGATC TGACCTGCCCC~TAC ATGAAGAAGCGCTTTACGCGCCCGCAAGCCAAACGCG;TGTTGGCCAGGGACTTTGCTAGAA(CATCAGC CATC  | CATC | Y    |
| 7*Chr2_70_IS407A_A                      | N   | Bm_NCTC_102  | 7  | 171756-172991   | Chr2 | IS407A | CAACA TGACCTGCCCC~TAC ATGAAGAAGCGCTTTACGCGCCCGCAAGCCAAACGCG;TGTTGGCCAGGGACTTTGCTAGAA(GTACC GTAC    | GTAC | Y    |
| 9*Chr2_9b_IS407A_A                      | D-R | Bm_SAVP1     | 9  | 1718700-1719935 | Chr2 | IS407A | CATGC TGACCTGCCCC~TAC ATGAAGAAGCGCTTTACGCGCCCGCAAGCCAAACGCG;TGTTGGCCAGGGACTTTGCTAGAA(TTGCTAG CAAG  | TTTG | N    |
| 6*Chr2_66_IS407A_B                      | N   | Bm_NCTC_102  | 6  | 1728529-1729764 | Chr2 | IS407A | TCAGT TGACCTGCCCC~TAC ATGAAGAAGCGCTTTACGCGCCCGCAAGCCAAACGCG;TGTTGGCCAGGGACTTTGCTAGAA(TGGCAGT TGCC  | TGGC | Y    |
| 8*Chr2_1_IS407A_B                       | N   | Bm_200272128 | 8  | 1744280-1745515 | Chr2 | IS407A | CCAGA TGACCTGCCCC~TAC ATGAAGAAGCGCTTTACGCGCCCGCAAGCCAAACGCG;TGTTGGCCAGGGACTTTGCTAGAA(CGGCGAA CGGC  | CGGC | Y    |
| 5*Chr2_58_IS407A_A                      | N   | Bm_ATCC_103  | 5  | 1752839-1754074 | Chr2 | IS407A | CGCGG TGACCTGCCCC~TAC ATGAAGAAGCGCTTTACGCGCCCGCAAGCCAAACGCG;TGTTGGCCAGGGACTTTGCTAGAA(ATCCGGG CGAC  | ATCC | N    |
| 10*Chr2_19_IS407A_B                     | N   | Bm_PRL20     | 10 | 1759323-1760558 | Chr2 | IS407A | TTATG TGACCTGCCCC~TAC ATGAAGAAGCGCTTTACGCGCCCGCAAGCCAAACGCG;TGTTGGCCAGGGACTTTGCTAGAA(GGGAT GGGT    | GGGT | Y    |
| 6*Chr2_62b_IS407,6*Chr2_75_IS407A_A     | D-R | Bm_NCTC_102  | 6  | 1759985-1761018 | Chr2 | IS407A | #IS407A ~~~~~ GCCCGCAAGCCAAACGCG;TGTTGGCCAGGGACTTTGCTAGAA(GTCCAGC IS407A?                          | GTCC | N.D. |
| 7*Chr2_34_IS407A,7*Chr2_54_IS407A_A     | D-R | Bm_NCTC_102  | 7  | 1782102-1783337 | Chr2 | IS407A | CGCGG TGACCTGCCCC~TAC ATGAAGAAGCGCTTTACGCGCCCGCAAGCCAAACGCG;TGTTGGCCAGGGACTTTGCTAGAA(GGATAGA GAGG  | GGAT | N    |
| 4*Chr2_58_IS407A_A                      | N   | Bm_gb8_horse | 4  | 1783542-1784777 | Chr2 | IS407A | CGCGG TGACCTGCCCC~TAC ATGAAGAAGCGCTTTACGCGCCCGCAAGCCAAACGCG;TGTTGGCCAGGGACTTTGCTAGAA(ATCCGGG CGAC  | ATCC | N    |
| 1*Chr2_58_IS407A_A                      | N   | Bm_ATCC_233  | 1  | 1790656-1791891 | Chr2 | IS407A | CGCGG TGACCTGCCCC~TAC ATGAAGAAGCGCTTTACGCGCCCGCAAGCCAAACGCG;TGTTGGCCAGGGACTTTGCTAGAA(ATCCGGG CGAC  | ATCC | N    |
| 10*Chr2_15a_IS407,10*Chr2_18_IS407A_A   | D-R | Bm_PRL20     | 10 | 1794050-1795285 | Chr2 | IS407A | AGACC TGACCTGCCCC~TAC ATGAAGAAGCGCTTTACGCGCCCGCAAGCCAAACGCG;TGTTGGCCAGGGACTTTGCTAGAA(GGATCAG AGAT  | GGAT | N    |
| 3*Chr2_58_IS407A_A                      | N   | Bm_JHU       | 3  | 1796992-1798227 | Chr2 | IS407A | CGCGG TGACCTGCCCC~TAC ATGAAGAAGCGCTTTACGCGCCCGCAAGCCAAACGCG;TGTTGGCCAGGGACTTTGCTAGAA(ATCCGGG CGAC  | ATCC | N    |
| 2*Chr2_70_IS407A_A                      | N   | Bm_fmh       | 2  | 180094-181329   | Chr2 | IS407A | CAACA TGACCTGCCCC~TAC ATGAAGAAGCGCTTTACGCGCCCGCAAGCCAAACGCG;TGTTGGCCAGGGACTTTGCTAGAA(GTACC GTAC    | GTAC | Y    |
| 7*Chr2_17_IS407A,7*Chr2_55_IS407A_A     | D-R | Bm_NCTC_102  | 7  | 1808233-1809468 | Chr2 | IS407A | GTTAA TGACCTGCCCC~TAC ATGAAGAAGCGCTTTACGCGCCCGCAAGCCAAACGCG;TGTTGGCCAGGGACTTTGCTAGAA(GTCCGCT CCCC  | GTCC | N    |
| 7*Chr2_15b_IS407A_A                     | R   | Bm_NCTC_102  | 7  | 1824067-1825302 | Chr2 | IS407A | CGCGC TGACCTGCCCC~TAC ATGAAGAAGCGCTTTACGCGCCCGCAAGCCAAACGCG;TGTTGGCCAGGGACTTTGCTAGAA(ACAGTTT GCTT  | ACAG | N    |
| 2*Chr2_58_IS407A_A                      | N   | Bm_fmh       | 2  | 1824347-1825582 | Chr2 | IS407A | CGCGG TGACCTGCCCC~TAC ATGAAGAAGCGCTTTACGCGCCCGCAAGCCAAACGCG;TGTTGGCCAGGGACTTTGCTAGAA(ATCCGGG CGAC  | ATCC | N    |
| 6*Chr2_62a_IS407,6*Chr2_74_IS407A_A     | D-R | Bm_NCTC_102  | 6  | 1838857-1840092 | Chr2 | IS407A | CCATC TGACCTGCCCC~TAC ATGAAGAAGCGCTTTACGCGCCCGCAAGCCAAACGCG;TGTTGGCCAGGGACTTTGCTAGAA(GTCCGCT CGAT  | CGGC | N    |
| 8*Chr2_15a_IS407,8*Chr2_18_IS407A_A     | D-R | Bm_200272128 | 8  | 1852506-1853741 | Chr2 | IS407A | AGACC TGACCTGCCCC~TAC ATGAAGAAGCGCTTTACGCGCCCGCAAGCCAAACGCG;TGTTGGCCAGGGACTTTGCTAGAA(GGATCAG AGAT  | GGAT | N    |
| 5*Chr2_59_IS407A_A                      | N   | Bm_ATCC_103  | 5  | 1862557-1863793 | Chr2 | IS407A | CCGCG TGACCTGCCCC~TAC ATGAAGAAGCGCTTTACGCGCCCGCAAGCCAAACGCG;TGTTGGCCAGGGACTTTGCTAGAA(GCCGGAT GTGC  | GGCG | N    |
| 6*Chr2_60_IS407A,6*Chr2_61_IS407A_A     | D   | Bm_NCTC_102  | 6  | 1863008-1864243 | Chr2 | IS407A | CGCCG TGACCTGCCCC~TAC ATGAAGAAGCGCTTTACGCGCCCGCAAGCCAAACGCG;TGTTGGCCAGGGACTTTGCTAGAA(CGACGGC CGTG  | CGAC | N    |
| 7*Chr2_23_IS407A_A                      | D-R | Bm_NCTC_102  | 7  | 1875193-1876428 | Chr2 | IS407A | CGCCG TGACCTGCCCC~TAC ATGAAGAAGCGCTTTACGCGCCCGCAAGCCAAACGCG;TGTTGGCCAGGGACTTTGCTAGAA(ATGGAT TCGAT  | ATGG | N    |
| 5*Chr2_20a_IS407,5*Chr2_60_IS407A_A     | D-R | Bm_ATCC_103  | 5  | 1883678-1884913 | Chr2 | IS407A | CGCCG TGACCTGCCCC~TAC ATGAAGAAGCGCTTTACGCGCCCGCAAGCCAAACGCG;TGTTGGCCAGGGACTTTGCTAGAA(GTACC CGTG    | GTAC | N    |
| 6*Chr2_59_IS407A_A                      | N   | Bm_NCTC_102  | 6  | 1884128-1885363 | Chr2 | IS407A | CCGCG TGACCTGCCCC~TAC ATGAAGAAGCGCTTTACGCGCCCGCAAGCCAAACGCG;TGTTGGCCAGGGACTTTGCTAGAA(GCCGGAT GTGC  | GGCG | N    |
| 4*Chr2_59_IS407A_A                      | N   | Bm_gb8_horse | 4  | 1892984-1894219 | Chr2 | IS407A | CCGCG TGACCTGCCCC~TAC ATGAAGAAGCGCTTTACGCGCCCGCAAGCCAAACGCG;TGTTGGCCAGGGACTTTGCTAGAA(GCCGGAT GTGC  | GGCG | N    |

|                                      |     |              |    |                 |      |        |                                                                                                      |                 |      |      |
|--------------------------------------|-----|--------------|----|-----------------|------|--------|------------------------------------------------------------------------------------------------------|-----------------|------|------|
| 1*Chr2_59_IS407A_A                   | N   | Bm_ATCC_2334 | 1  | 1900428-1901663 | Chr2 | IS407A | CCGCG TGACCTGCCCCC~TAC ATGAAGAAGCGCTTTACGCGCCCGCAAGCCAAACGCG; TGTTGGCCAGGGACTTTGCTAGAA(GCCGGAT)GTGC  | GGCG            | N    |      |
| 3*Chr2_59_IS407A_A                   | N   | Bm_JHU       | 3  | 1908125-1909360 | Chr2 | IS407A | CCGCG TGACCTGCCCCC~TAC ATGAAGAAGCGCTTTACGCGCCCGCAAGCCAAACGCG; TGTTGGCCAGGGACTTTGCTAGAA(GCCGGAT)GTGC  | GGCG            | N    |      |
| 4*Chr2_20a_IS407/4*Chr2_60_IS407A_A  | D-R | Bm_gb8_horse | 4  | 1913865-1915100 | Chr2 | IS407A | CGCG TGACCTGCCCCC~TAC ATGAAGAAGCGCTTTACGCGCCCGCAAGCCAAACGCG; TGTTGGCCAGGGACTTTGCTAGAA(GTACACCI)CGTG  | GTAC            | N    |      |
| 5*Chr2_15a_IS407/5*Chr2_18_IS407A_A  | D-R | Bm_ATCC_1034 | 5  | 1919751-1920986 | Chr2 | IS407A | AGACC TGACCTGCCCCC~TAC ATGAAGAAGCGCTTTACGCGCCCGCAAGCCAAACGCG; TGTTGGCCAGGGACTTTGCTAGAA(GGATCAG)AGAT  | GGAT            | N    |      |
| 1*Chr2_20a_IS407/1*Chr2_60_IS407A_A  | D-R | Bm_ATCC_2334 | 1  | 1921548-1922783 | Chr2 | IS407A | CGCG TGACCTGCCCCC~TAC ATGAAGAAGCGCTTTACGCGCCCGCAAGCCAAACGCG; TGTTGGCCAGGGACTTTGCTAGAA(GTACACCI)CGTG  | GTAC            | N    |      |
| 3*Chr2_20a_IS407/3*Chr2_60_IS407A_A  | D-R | Bm_JHU       | 3  | 1929245-1930480 | Chr2 | IS407A | CGCG TGACCTGCCCCC~TAC ATGAAGAAGCGCTTTACGCGCCCGCAAGCCAAACGCG; TGTTGGCCAGGGACTTTGCTAGAA(GTACACCI)CGTG  | GTAC            | N    |      |
| 2*Chr2_59_IS407A_A                   | N   | Bm_fmh       | 2  | 1936651-1937886 | Chr2 | IS407A | CCGCG TGACCTGCCCCC~TAC ATGAAGAAGCGCTTTACGCGCCCGCAAGCCAAACGCG; TGTTGGCCAGGGACTTTGCTAGAA(GCCGGAT)GTGC  | GGCG            | N    |      |
| 4*Chr2_15a_IS407/4*Chr2_18_IS407A_A  | D-R | Bm_gb8_horse | 4  | 1949938-1951173 | Chr2 | IS407A | AGACC TGACCTGCCCCC~TAC ATGAAGAAGCGCTTTACGCGCCCGCAAGCCAAACGCG; TGTTGGCCAGGGACTTTGCTAGAA(GGATCAG)AGAT  | GGAT            | N    |      |
| 1*Chr2_15a_IS407/1*Chr2_18_IS407A_A  | D-R | Bm_ATCC_2334 | 1  | 1957621-1958856 | Chr2 | IS407A | AGACC TGACCTGCCCCC~TAC ATGAAGAAGCGCTTTACGCGCCCGCAAGCCAAACGCG; TGTTGGCCAGGGACTTTGCTAGAA(GGATCAG)AGAT  | GGAT            | N    |      |
| 2*Chr2_20a_IS407/2*Chr2_60_IS407A_A  | D-R | Bm_fmh       | 2  | 1957771-1959006 | Chr2 | IS407A | CGCG TGACCTGCCCCC~TAC ATGAAGAAGCGCTTTACGCGCCCGCAAGCCAAACGCG; TGTTGGCCAGGGACTTTGCTAGAA(GTACACCI)CGTG  | GTAC            | N    |      |
| 3*Chr2_15a_IS407/3*Chr2_18_IS407A_A  | D-R | Bm_JHU       | 3  | 1965318-1966553 | Chr2 | IS407A | AGACC TGACCTGCCCCC~TAC ATGAAGAAGCGCTTTACGCGCCCGCAAGCCAAACGCG; TGTTGGCCAGGGACTTTGCTAGAA(GGATCAG)AGAT  | GGAT            | N    |      |
| 10*Chr2_3_IS407A 10*Chr2_72_IS407A_A | D-R | Bm_PRL20     | 10 | 1972722-1973957 | Chr2 | IS407A | AGTCC TGACCTGCCCCC~TAC ATGAAGAAGCGCTTTACGCGCCCGCAAGCCAAACGCG; TGTTGGCCAGGGACTTTGCTAGAA(GATGGAT)GGGT  | GATG            | N    |      |
| 7*Chr2_15a_IS407/7*Chr2_18_IS407A_A  | D-R | Bm_NCTC_1024 | 7  | 1986607-1987842 | Chr2 | IS407A | AGACC TGACCTGCCCCC~TAC ATGAAGAAGCGCTTTACGCGCCCGCAAGCCAAACGCG; TGTTGGCCAGGGACTTTGCTAGAA(GGATCAG)AGAT  | GGAT            | N    |      |
| 8*Chr2_35_IS407A_A                   | N   | Bm_200272128 | 8  | 199085-200320   | Chr2 | IS407A | CGATC TGACCTGCCCCC~TAC ATGAAGAAGCGCTTTACGCGCCCGCAAGCCAAACGCG; TGTTGGCCAGGGACTTTGCTAGAA(CATCAGC)CATC  | CATC            | Y    |      |
| 2*Chr2_15a_IS407/2*Chr2_18_IS407A_A  | D-R | Bm_fmh       | 2  | 1993844-1995079 | Chr2 | IS407A | AGACC TGACCTGCCCCC~TAC ATGAAGAAGCGCTTTACGCGCCCGCAAGCCAAACGCG; TGTTGGCCAGGGACTTTGCTAGAA(GGATCAG)AGAT  | GGAT            | N    |      |
| 6*Chr2_58_IS407A_A                   | N   | Bm_NCTC_1024 | 6  | 1994016-1995251 | Chr2 | IS407A | CGCG TGACCTGCCCCC~TAC ATGAAGAAGCGCTTTACGCGCCCGCAAGCCAAACGCG; TGTTGGCCAGGGACTTTGCTAGAA(ATCCGGG)CGAC   | ATCC            | N    |      |
| 6*Chr2_10b_IS407A_A                  | R   | Bm_NCTC_1024 | 6  | 20142-21377     | Chr2 | IS407A | GCCTC TGACCTGCCCCC~TAC ATGAAGAAGCGCTTTACGCGCCCGCAAGCCAAACGCG; TGTTGGCCAGGGACTTTGCTAGAA(TTGTCTAG)CGCG | TTGT            | N    |      |
| 8*Chr2_3_IS407A/8*Chr2_76_IS407A_A   | D-R | Bm_200272128 | 8  | 2030650-2031885 | Chr2 | IS407A | GGGCA TGACCTGCCCCC~TAC ATGAAGAAGCGCTTTACGCGCCCGCAAGCCAAACGCG; TGTTGGCCAGGGACTTTGCTAGAA(TCTTCTT)GATG  | TCTT            | N    |      |
| 3*Chr2_70_IS407A_A                   | N   | Bm_JHU       | 3  | 207666-208901   | Chr2 | IS407A | CAACA TGACCTGCCCCC~TAC ATGAAGAAGCGCTTTACGCGCCCGCAAGCCAAACGCG; TGTTGGCCAGGGACTTTGCTAGAA(GTACCCG)GTAC  | GTAC            | Y    |      |
| 5*Chr2_3_IS407A/5*Chr2_76_IS407A_A   | D-R | Bm_ATCC_1034 | 5  | 2097872-2099107 | Chr2 | IS407A | AGTCC TGACCTGCCCCC~TAC ATGAAGAAGCGCTTTACGCGCCCGCAAGCCAAACGCG; TGTTGGCCAGGGACTTTGCTAGAA(TCTTCTT)GGGT  | TCTT            | N    |      |
| 4*Chr2_3_IS407A/4*Chr2_76_IS407A_A   | D-R | Bm_gb8_horse | 4  | 2128166-2129401 | Chr2 | IS407A | AGTCC TGACCTGCCCCC~TAC ATGAAGAAGCGCTTTACGCGCCCGCAAGCCAAACGCG; TGTTGGCCAGGGACTTTGCTAGAA(TCTTCTT)GGGT  | TCTT            | N    |      |
| 1*Chr2_3_IS407A/1*Chr2_76_IS407A_A   | D-R | Bm_ATCC_2334 | 1  | 2135943-2137178 | Chr2 | IS407A | AGTCC TGACCTGCCCCC~TAC ATGAAGAAGCGCTTTACGCGCCCGCAAGCCAAACGCG; TGTTGGCCAGGGACTTTGCTAGAA(TCTTCTT)GGGT  | TCTT            | N    |      |
| 6*Chr2_13b_IS407/6*Chr2_57b_IS407A_A | R   | Bm_NCTC_1024 | 6  | 2142275-2143510 | Chr2 | IS407A | CAAGC TGACCTGCCCCC~TAC ATGAAGAAGCGCTTTACGCGCCCGCAAGCCAAACGCG; TGTTGGCCAGGGACTTTGCTAGAA(ATCTTCCC)GGTT | ATCT            | N    |      |
| 3*Chr2_3_IS407A/3*Chr2_76_IS407A_A   | D-R | Bm_JHU       | 3  | 2146619-2147854 | Chr2 | IS407A | AGTCC TGACCTGCCCCC~TAC ATGAAGAAGCGCTTTACGCGCCCGCAAGCCAAACGCG; TGTTGGCCAGGGACTTTGCTAGAA(TCTTCTT)GGGT  | TCTT            | N    |      |
| 6*Chr2_16_IS407A_A                   | N   | Bm_NCTC_1024 | 6  | 2149021-2150256 | Chr2 | IS407A | GGCGA TGACCTGCCCCC~TAC ATGAAGAAGCGCTTTACGCGCCCGCAAGCCAAACGCG; TGTTGGCCAGGGACTTTGCTAGAA(CGTGAAC)CGTG  | CGTG            | Y    |      |
| 7*Chr2_3_IS407A/7*Chr2_76_IS407A_A   | D-R | Bm_NCTC_1024 | 7  | 2164773-2166008 | Chr2 | IS407A | GGGCA TGACCTGCCCCC~TAC ATGAAGAAGCGCTTTACGCGCCCGCAAGCCAAACGCG; TGTTGGCCAGGGACTTTGCTAGAA(TCTTCTT)GATG  | TCTT            | N    |      |
| 2*Chr2_3_IS407A/2*Chr2_76_IS407A_A   | D-R | Bm_fmh       | 2  | 2173035-2174270 | Chr2 | IS407A | AGTCC TGACCTGCCCCC~TAC ATGAAGAAGCGCTTTACGCGCCCGCAAGCCAAACGCG; TGTTGGCCAGGGACTTTGCTAGAA(TCTTCTT)GGGT  | TCTT            | N    |      |
| 6*Chr2_24_IS407A_A                   | D-R | Bm_NCTC_1024 | 6  | 22152-23387     | Chr2 | IS407A | CGGGA TGACCTGCCCCC~TAC ATGAAGAAGCGCTTTACGCGCCCGCAAGCCAAACGCG; TGTTGGCCAGGGACTTTGCTAGAA(GGATCTT)CCAC  | GGAG            | N    |      |
| 5*Chr2_67_IS407A 5*Chr2_68_IS407A_A  | N   | Bm_ATCC_1034 | 5  | 223244-224479   | Chr2 | IS407A | CACGC TGACCTGCCCCC~TAC ATGAAGAAGCGCTTTACGCGCCCGCAAGCCAAACGCG; TGTTGGCCAGGGACTTTGCTAGAA(CCCTGCC)GGTC  | CCCT            | N    |      |
| 9*Chr2_42_IS407A_A                   | N   | Bm_SAVP1     | 9  | 223530-224765   | Chr2 | IS407A | ATCGA TGACCTGCCCCC~TAC ATGAAGAAGCGCTTTACGCGCCCGCAAGCCAAACGCG; TGTTGGCCAGGGACTTTGCTAGAA(ATCGGCC)CTCG  | CTCG            | Y    |      |
| 4*Chr2_81_IS407A_B                   | N   | Bm_gb8_horse | 4  | 2259017-2260252 | Chr2 | IS407A | AGTTC TGACCTGCCCCC~TAC ATGAAGAAGCGCTTTACGCGCCCGCAAGCCAAACGCG; TGTTGGCCAGGGACTTTGCTAGAA(CCGCCAT)ACGC  | ACGC            | Y    |      |
| 1*Chr2_81_IS407A_B                   | N   | Bm_ATCC_2334 | 1  | 2267062-2268297 | Chr2 | IS407A | AGTTC TGACCTGCCCCC~TAC ATGAAGAAGCGCTTTACGCGCCCGCAAGCCAAACGCG; TGTTGGCCAGGGACTTTGCTAGAA(ACGCCAT)ACGC  | ACGC            | Y    |      |
| 6*Chr2_9a_IS407A_A                   | N   | Bm_NCTC_1024 | 6  | 2267886-2269121 | Chr2 | IS407A | CATGC TGACCTGCCCCC~TAC ATGAAGAAGCGCTTTACGCGCCCGCAAGCCAAACGCG; TGTTGGCCAGGGACTTTGCTAGAA(CAAGCAG)CAAG  | CAAG            | Y    |      |
| 3*Chr2_81_IS407A_B                   | N   | Bm_JHU       | 3  | 2282239-2283474 | Chr2 | IS407A | AGTTC TGACCTGCCCCC~TAC ATGAAGAAGCGCTTTACGCGCCCGCAAGCCAAACGCG; TGTTGGCCAGGGACTTTGCTAGAA(ACCCAT)ACGC   | ACGC            | Y    |      |
| 10*Chr2_67_IS407/10*Chr2_68_IS407A_A | N   | Bm_PRL20     | 10 | 228919-230154   | Chr2 | IS407A | CACGC TGACCTGCCCCC~TAC ATGAAGAAGCGCTTTACGCGCCCGCAAGCCAAACGCG; TGTTGGCCAGGGACTTTGCTAGAA(CCGTCCC)GGTC  | CCCT            | N    |      |
| 5*Chr2_72_IS407A_A                   | N   | Bm_ATCC_1034 | 5  | 2293242-2294477 | Chr2 | IS407A | CACAT TGACCTGCCCCC~TAC ATGAAGAAGCGCTTTACGCGCCCGCAAGCCAAACGCG; TGTTGGCCAGGGACTTTGCTAGAA(GATGGAT)GATG  | GATG            | Y    |      |
| 2*Chr2_81_IS407A_B                   | N   | Bm_fmh       | 2  | 2307475-2308710 | Chr2 | IS407A | AGTTC TGACCTGCCCCC~TAC ATGAAGAAGCGCTTTACGCGCCCGCAAGCCAAACGCG; TGTTGGCCAGGGACTTTGCTAGAA(ACGCCAT)ACGC  | ACGC            | Y    |      |
| 5*Chr2_2_IS407A/5*Chr2_73_IS407A_A   | D-R | Bm_ATCC_1034 | 5  | 2316126-2317361 | Chr2 | IS407A | CGCTG TGACCTGCCCCC~TAC ATGAAGAAGCGCTTTACGCGCCCGCAAGCCAAACGCG; TGTTGGCCAGGGACTTTGCTAGAA(CAACCA)GTGT   | CAAC            | N    |      |
| 6*Chr2_51_IS407A_A                   | N   | Bm_NCTC_1024 | 6  | 247301-248536   | Chr2 | IS407A | CGGCC TGACCTGCCCCC~TAC ATGAAGAAGCGCTTTACGCGCCCGCAAGCCAAACGCG; TGTTGGCCAGGGACTTTGCTAGAA(GCCGGC)GGCG   | GGCG            | Y    |      |
| 4*Chr2_67_IS407A 4*Chr2_68_IS407A_A  | N   | Bm_gb8_horse | 4  | 267595-268830   | Chr2 | IS407A | CACGC TGACCTGCCCCC~TAC ATGAAGAAGCGCTTTACGCGCCCGCAAGCCAAACGCG; TGTTGGCCAGGGACTTTGCTAGAA(CCTGCC)GGTC   | CCCT            | N    |      |
| 1*Chr2_67_IS407A 1*Chr2_68_IS407A_A  | N   | Bm_ATCC_2334 | 1  | 268389-269624   | Chr2 | IS407A | CACGC TGACCTGCCCCC~TAC ATGAAGAAGCGCTTTACGCGCCCGCAAGCCAAACGCG; TGTTGGCCAGGGACTTTGCTAGAA(CCTGCC)GGTC   | CCCT            | N    |      |
| 6*Chr2_49_IS407A_A                   | N   | Bm_NCTC_1024 | 6  | 269225-270460   | Chr2 | IS407A | CCGAC TGACCTGCCCCC~TAC ATGAAGAAGCGCTTTACGCGCCCGCAAGCCAAACGCG; TGTTGGCCAGGGACTTTGCTAGAA(AGCGAC)AGCG   | AGCG            | Y    |      |
| 7*Chr2_67_IS407A 7*Chr2_68_IS407A_A  | N   | Bm_NCTC_1024 | 7  | 269548-270783   | Chr2 | IS407A | CACGC TGACCTGCCCCC~TAC ATGAAGAAGCGCTTTACGCGCCCGCAAGCCAAACGCG; TGTTGGCCAGGGACTTTGCTAGAA(CCTGCC)GGTC   | CCCT            | N    |      |
| 2*Chr2_67_IS407A 2*Chr2_68_IS407A_A  | N   | Bm_fmh       | 2  | 277886-279121   | Chr2 | IS407A | CACGC TGACCTGCCCCC~TAC ATGAAGAAGCGCTTTACGCGCCCGCAAGCCAAACGCG; TGTTGGCCAGGGACTTTGCTAGAA(CCTGCC)GGTC   | CCCT            | N    |      |
| 8*Chr2_37_IS407A 8*Chr2_57a_IS407A_A | D-R | Bm_200272128 | 8  | 278376-279611   | Chr2 | IS407A | CCCTT TGACCTGCCCCC~TAC ATGAAGAAGCGCTTTACGCGCCCGCAAGCCAAACGCG; TGTTGGCCAGGGACTTTGCTAGAA(CCGCCG)ACCT   | CGCC            | N    |      |
| 5*Chr2_62b_IS407/5*Chr2_75_IS407A_A  | D-R | Bm_ATCC_1034 | 5  | 284510-285543   | Chr2 | IS407A | #IS407/~~~~~ GCCCGCAAGCCAAACGCG; TGTTGGCCAGGGACTTTGCTAGAA(GTCGATC)IS607A?                            | GTCG            | N.D. |      |
| 10*Chr2_75_IS407A_A                  | D-R | Bm_PRL20     | 10 | 291658-292532   | Chr2 | IS407A | #IS407/~~~~~ GCCCGCAAGCCAAACGCG; TGTTGGCC#                                                           | #IS407A IS607A? | #IS4 | N.D. |
| 10*Chr2_62b_IS407A_A                 | R   | Bm_PRL20     | 10 | 292289-293524   | Chr2 | IS407A | CTAGA TGACCTGCCCCC~TAC ATGAAGAAGCGCTTTACGCGCCCGCAAGCCAAACGCG; TGTTGGCCAGGGACTTTGCTAGAA(CACGC)GATC    | CACG            | N    |      |
| 6*Chr2_48_IS407A_A                   | N   | Bm_NCTC_1024 | 6  | 297003-298238   | Chr2 | IS407A | CATTC TGACCTGCCCCC~TAC ATGAAGAAGCGCTTTACGCGCCCGCAAGCCAAACGCG; TGTTGGCCAGGGACTTTGCTAGAA(GCCGTC)CGCC   | GCCG            | Y    |      |
| 7*Chr2_66_IS407A_B                   | N   | Bm_NCTC_1024 | 7  | 300642-301877   | Chr2 | IS407A | TCAGT TGACCTGCCCCC~TAC ATGAAGAAGCGCTTTACGCGCCCGCAAGCCAAACGCG; TGTTGGCCAGGGACTTTGCTAGAA(TGGCAT)TGCC   | TGCC            | Y    |      |
| 3*Chr2_67_IS407A 3*Chr2_68_IS407A_A  | N   | Bm_JHU       | 3  | 306238-307473   | Chr2 | IS407A | CACGC TGACCTGCCCCC~TAC ATGAAGAAGCGCTTTACGCGCCCGCAAGCCAAACGCG; TGTTGGCCAGGGACTTTGCTAGAA(CCTGCC)GGTC   | CCCT            | N    |      |
| 9*Chr2_40_IS407A 9*Chr2_41_IS407A_B  | D   | Bm_SAVP1     | 9  | 311876-313111   | Chr2 | IS407A | GAAGG TGACCTGCCCCC~TAC ATGAAGAAGCGCTTTACGCGCCCGCAAGCCAAACGCG; TGTTGGCCAGGGACTTTGCTAGAA(CGAAGT)AGCG   | CGAA            | N    |      |
| 4*Chr2_62b_IS407/4*Chr2_75_IS407A_A  | D-R | Bm_gb8_horse | 4  | 328902-329935   | Chr2 | IS407A | #IS407/~~~~~ GCCCGCAAGCCAAACGCG; TGTTGGCCAGGGACTTTGCTAGAA(GTCGATC)IS607A?                            | GTCG            | N.D. |      |
| 1*Chr2_62b_IS407/1*Chr2_75_IS407A_A  | D-R | Bm_ATCC_2334 | 1  | 329696-330729   | Chr2 | IS407A | #IS407/~~~~~ GCCCGCAAGCCAAACGCG; TGTTGGCCAGGGACTTTGCTAGAA(GTCGATC)IS607A?                            | GTCG            | N.D. |      |
| 7*Chr2_62b_IS407/7*Chr2_75_IS407A_A  | D-R | Bm_NCTC_1024 | 7  | 332069-333102   | Chr2 | IS407A | #IS407/~~~~~ GCCCGCAAGCCAAACGCG; TGTTGGCCAGGGACTTTGCTAGAA(GTCGATC)IS607A?                            | GTCG            | N.D. |      |
| 2*Chr2_62b_IS407/2*Chr2_75_IS407A_A  | D-R | Bm_fmh       | 2  | 339193-340226   | Chr2 | IS407A | #IS407/~~~~~ GCCCGCAAGCCAAACGCG; TGTTGGCCAGGGACTTTGCTAGAA(GTCGATC)IS607A?                            | GTCG            | N.D. |      |
| 7*Chr2_1_IS407A_B                    | N   | Bm_NCTC_1024 | 7  | 36098-37333     | Chr2 | IS407A | CCAGA TGACCTGCCCCC~TAC ATGAAGAAGCGCTTTACGCGCCCGCAAGCCAAACGCG; TGTTGGCCAGGGACTTTGCTAGAA(CGGCGAA)CGGC  | CGGC            | Y    |      |
| 5*Chr2_62a_IS407/5*Chr2_74_IS407A_A  | D-R | Bm_ATCC_1034 | 5  | 363336-364571   | Chr2 | IS407A | CCATC TGACCTGCCCCC~TAC ATGAAGAAGCGCTTTACGCGCCCGCAAGCCAAACGCG; TGTTGGCCAGGGACTTTGCTAGAA(CGGCTTC)TGAT  | CGGC            | N    |      |

|                                       |     |              |    |               |      |        |                                                                                                     |      |      |
|---------------------------------------|-----|--------------|----|---------------|------|--------|-----------------------------------------------------------------------------------------------------|------|------|
| 3*Chr2_62b_IS407;3*Chr2_75_IS407A_A   | D-R | Bm_JHU       | 3  | 367812-368845 | Chr2 | IS407A | #IS407/~~~~~ GCCCGCAAGCCAAACGCG;TGTTGGCCAGGGACTTTGCTAGAA(GTCGATC/IS607A?                            | GTCC | N.D. |
| 10*Chr2_62a_IS407;10*Chr2_74_IS407A_A | D-R | Bm_PRL20     | 10 | 370625-371860 | Chr2 | IS407A | CCATC/TGACCTGCCCC~TAC ATGAAGAAGCGCTTTACGCGCCCGCAAGCCAAACGCG;TGTTGGCCAGGGACTTTGCTAGAA(CGGCTTC TGAT   | CGGC | N    |
| 9*Chr2_38_IS407A;9*Chr2_50_IS407A_B   | D-R | Bm_SAVP1     | 9  | 379739-380974 | Chr2 | IS407A | GTCCA/TGACCTGCCCC~TAC ATGAAGAAGCGCTTTACGCGCCCGCAAGCCAAACGCG;TGTTGGCCAGGGACTTTGCTAGAA(CGCGAGA/GAAC   | CGCG | N    |
| 8*Chr2_24_IS407A;8*Chr2_56_IS407A_A   | D-R | Bm_200272128 | 8  | 382829-384064 | Chr2 | IS407A | CGGGA/TGACCTGCCCC~TAC ATGAAGAAGCGCTTTACGCGCCCGCAAGCCAAACGCG;TGTTGGCCAGGGACTTTGCTAGAA(CATCGGC/CCAC   | CATC | N    |
| 5*Chr2_20b_IS407;5*Chr2_61_IS407A_A   | D-R | Bm_ATCC_103  | 5  | 387487-388722 | Chr2 | IS407A | CGCGA/TGACCTGCCCC~TAC ATGAAGAAGCGCTTTACGCGCCCGCAAGCCAAACGCG;TGTTGGCCAGGGACTTTGCTAGAA(CGACGCG/GTAC   | CGAC | N    |
| 9*Chr2_51_IS407A_A                    | N   | Bm_SAVP1     | 9  | 393155-394390 | Chr2 | IS407A | CGGCC/TGACCTGCCCC~TAC ATGAAGAAGCGCTTTACGCGCCCGCAAGCCAAACGCG;TGTTGGCCAGGGACTTTGCTAGAA(GCCGCGC/GCGC   | GGCG | Y    |
| 10*Chr2_60_IS407;10*Chr2_61_IS407A_A  | D   | Bm_PRL20     | 10 | 394776-396011 | Chr2 | IS407A | CGCCG/TGACCTGCCCC~TAC ATGAAGAAGCGCTTTACGCGCCCGCAAGCCAAACGCG;TGTTGGCCAGGGACTTTGCTAGAA(CGACGCG/CGTG   | CGAC | N    |
| 4*Chr2_62a_IS407;4*Chr2_74_IS407A_A   | D-R | Bm_gb8_horse | 4  | 407716-408951 | Chr2 | IS407A | CCATC/TGACCTGCCCC~TAC ATGAAGAAGCGCTTTACGCGCCCGCAAGCCAAACGCG;TGTTGGCCAGGGACTTTGCTAGAA(CGGCTTC TGAT   | CGCG | N    |
| 6*Chr2_44a_IS407A_A                   | N   | Bm_NCTC_102  | 6  | 408123-409358 | Chr2 | IS407A | GACAG/TGACCTGCCCC~TAC ATGAAGAAGCGCTTTACGCGCCCGCAAGCCAAACGCG;TGTTGGCCAGGGACTTTGCTAGAA(AGGGGTA/CGCC   | AGGG | N    |
| 1*Chr2_62a_IS407;1*Chr2_74_IS407A_A   | D-R | Bm_ATCC_233  | 1  | 408708-409943 | Chr2 | IS407A | CCATC/TGACCTGCCCC~TAC ATGAAGAAGCGCTTTACGCGCCCGCAAGCCAAACGCG;TGTTGGCCAGGGACTTTGCTAGAA(CGGCTTC TGAT   | CGCG | N    |
| 9*Chr2_45_IS407A_B                    | N   | Bm_SAVP1     | 9  | 41016-42251   | Chr2 | IS407A | CGGGC/TGACCTGCCCC~TAC ATGAAGAAGCGCTTTACGCGCCCGCAAGCCAAACGCG;TGTTGGCCAGGGACTTTGCTAGAA(GCCCGC/CTTT    | GCCC | N    |
| 7*Chr2_62a_IS407;7*Chr2_74_IS407A_A   | D-R | Bm_NCTC_102  | 7  | 410900-412135 | Chr2 | IS407A | CCATC/TGACCTGCCCC~TAC ATGAAGAAGCGCTTTACGCGCCCGCAAGCCAAACGCG;TGTTGGCCAGGGACTTTGCTAGAA(CGGCTTC TGAT   | CGCG | N    |
| 8*Chr2_23_IS407A_A                    | D-R | Bm_200272128 | 8  | 41226-42461   | Chr2 | IS407A | CGCCG/TGACCTGCCCC~TAC ATGAAGAAGCGCTTTACGCGCCCGCAAGCCAAACGCG;TGTTGGCCAGGGACTTTGCTAGAA(ATGGATT CGAT   | ATGG | N    |
| 10*Chr2_59_IS407A_A                   | N   | Bm_PRL20     | 10 | 415896-417131 | Chr2 | IS407A | CGCGC/TGACCTGCCCC~TAC ATGAAGAAGCGCTTTACGCGCCCGCAAGCCAAACGCG;TGTTGGCCAGGGACTTTGCTAGAA(GCCGGAT/GTGC   | GGCG | N    |
| 8*Chr2_26_IS407A;8*Chr2_27_IS407A_A   | D   | Bm_200272128 | 8  | 418100-419335 | Chr2 | IS407A | CTGGC/TGACCTGCCCC~TAC ATGAAGAAGCGCTTTACGCGCCCGCAAGCCAAACGCG;TGTTGGCCAGGGACTTTGCTAGAA(CCCGAGC/CGAG   | CCCC | N    |
| 2*Chr2_62a_IS407;2*Chr2_74_IS407A_A   | D-R | Bm_fmh       | 2  | 418863-420098 | Chr2 | IS407A | CCATC/TGACCTGCCCC~TAC ATGAAGAAGCGCTTTACGCGCCCGCAAGCCAAACGCG;TGTTGGCCAGGGACTTTGCTAGAA(CGGCTTC TGAT   | CGGC | N    |
| 4*Chr2_20b_IS407;4*Chr2_61_IS407A_A   | D-R | Bm_gb8_horse | 4  | 431867-433102 | Chr2 | IS407A | CGCGA/TGACCTGCCCC~TAC ATGAAGAAGCGCTTTACGCGCCCGCAAGCCAAACGCG;TGTTGGCCAGGGACTTTGCTAGAA(CGACGCG/GTAC   | CGAC | N    |
| 1*Chr2_20b_IS407;1*Chr2_61_IS407A_A   | D-R | Bm_ATCC_233  | 1  | 432859-434094 | Chr2 | IS407A | CGCGA/TGACCTGCCCC~TAC ATGAAGAAGCGCTTTACGCGCCCGCAAGCCAAACGCG;TGTTGGCCAGGGACTTTGCTAGAA(CGACGCG/GTAC   | CGAC | N    |
| 7*Chr2_60_IS407A;7*Chr2_61_IS407A_A   | D   | Bm_NCTC_102  | 7  | 435051-436286 | Chr2 | IS407A | CGCCG/TGACCTGCCCC~TAC ATGAAGAAGCGCTTTACGCGCCCGCAAGCCAAACGCG;TGTTGGCCAGGGACTTTGCTAGAA(CGACGCG/CGTG   | CGAC | N    |
| 2*Chr2_20b_IS407;2*Chr2_61_IS407A_A   | D-R | Bm_fmh       | 2  | 442944-444179 | Chr2 | IS407A | CGCGA/TGACCTGCCCC~TAC ATGAAGAAGCGCTTTACGCGCCCGCAAGCCAAACGCG;TGTTGGCCAGGGACTTTGCTAGAA(CGACGCG/GTAC   | CGAC | N    |
| 3*Chr2_62a_IS407;3*Chr2_74_IS407A_A   | D-R | Bm_JHU       | 3  | 447920-449155 | Chr2 | IS407A | CCATC/TGACCTGCCCC~TAC ATGAAGAAGCGCTTTACGCGCCCGCAAGCCAAACGCG;TGTTGGCCAGGGACTTTGCTAGAA(CGGCTTC TGAT   | CGCG | N    |
| 7*Chr2_59_IS407A_A                    | N   | Bm_NCTC_102  | 7  | 456171-457406 | Chr2 | IS407A | CGCCG/TGACCTGCCCC~TAC ATGAAGAAGCGCTTTACGCGCCCGCAAGCCAAACGCG;TGTTGGCCAGGGACTTTGCTAGAA(GCCGGAT/GTGC   | GGCG | N    |
| 5*Chr2_23_IS407A_A                    | D-R | Bm_ATCC_103  | 5  | 465011-466246 | Chr2 | IS407A | CGCCG/TGACCTGCCCC~TAC ATGAAGAAGCGCTTTACGCGCCCGCAAGCCAAACGCG;TGTTGGCCAGGGACTTTGCTAGAA(ATGGATT CGAT   | ATGG | N    |
| 8*Chr2_28_IS407A;8*Chr2_31b_IS407A_A  | D   | Bm_200272128 | 8  | 466537-467772 | Chr2 | IS407A | GAAAG/TGACCTGCCCC~TAC ATGAAGAAGCGCTTTACGCGCCCGCAAGCCAAACGCG;TGTTGGCCAGGGACTTTGCTAGAA(CGATGCTC/GATC  | CGAT | N    |
| 3*Chr2_20b_IS407;3*Chr2_61_IS407A_A   | D-R | Bm_JHU       | 3  | 472071-473306 | Chr2 | IS407A | CGCGA/TGACCTGCCCC~TAC ATGAAGAAGCGCTTTACGCGCCCGCAAGCCAAACGCG;TGTTGGCCAGGGACTTTGCTAGAA(CGACGCG/GTAC   | CGAC | N    |
| 9*Chr2_52_IS407A_A                    | N   | Bm_SAVP1     | 9  | 472566-473801 | Chr2 | IS407A | GAATT/TGACCTGCCCC~TAC ATGAAGAAGCGCTTTACGCGCCCGCAAGCCAAACGCG;TGTTGGCCAGGGACTTTGCTAGAA(CCGTACC/GGAT   | CCGT | N    |
| 10*Chr2_23_IS407A_A                   | D-R | Bm_PRL20     | 10 | 492363-493598 | Chr2 | IS407A | AATGG/TGACCTGCCCC~TAC ATGAAGAAGCGCTTTACGCGCCCGCAAGCCAAACGCG;TGTTGGCCAGGGACTTTGCTAGAA(ATCGGCC/CCAT   | ATCG | N    |
| 9*Chr2_33_IS407A;9*Chr2_53_IS407A_A   | D-R | Bm_SAVP1     | 9  | 497742-498977 | Chr2 | IS407A | GCGAC/TGACCTGCCCC~TAC ATGAAGAAGCGCTTTACGCGCCCGCAAGCCAAACGCG;TGTTGGCCAGGGACTTTGCTAGAA(GTCAAGC/CGTG   | CGTG | N    |
| 8*Chr2_33_IS407A;8*Chr2_53_IS407A_A   | D-R | Bm_200272128 | 8  | 503874-505109 | Chr2 | IS407A | GTGCC/TGACCTGCCCC~TAC ATGAAGAAGCGCTTTACGCGCCCGCAAGCCAAACGCG;TGTTGGCCAGGGACTTTGCTAGAA(GTCCAGC/ACGG   | GTCC | N    |
| 4*Chr2_23_IS407A_A                    | D-R | Bm_gb8_horse | 4  | 508200-509435 | Chr2 | IS407A | AATGG/TGACCTGCCCC~TAC ATGAAGAAGCGCTTTACGCGCCCGCAAGCCAAACGCG;TGTTGGCCAGGGACTTTGCTAGAA(ATCGGCC/CCAT   | ATCG | N    |
| 1*Chr2_23_IS407A_A                    | D-R | Bm_ATCC_233  | 1  | 509411-510646 | Chr2 | IS407A | AATGG/TGACCTGCCCC~TAC ATGAAGAAGCGCTTTACGCGCCCGCAAGCCAAACGCG;TGTTGGCCAGGGACTTTGCTAGAA(ATCGGCC/CCAT   | ATCG | N    |
| 6*Chr2_42_IS407A_A                    | N   | Bm_NCTC_102  | 6  | 513999-515234 | Chr2 | IS407A | ATCGA/TGACCTGCCCC~TAC ATGAAGAAGCGCTTTACGCGCCCGCAAGCCAAACGCG;TGTTGGCCAGGGACTTTGCTAGAA(CTGCGGC/CTGC   | CTGC | Y    |
| 5*Chr2_15b_IS407A_A                   | R   | Bm_ATCC_103  | 5  | 515849-517084 | Chr2 | IS407A | CGCCG/TGACCTGCCCC~TAC ATGAAGAAGCGCTTTACGCGCCCGCAAGCCAAACGCG;TGTTGGCCAGGGACTTTGCTAGAA(ACAGTTTT GCTT  | ACAG | N    |
| 2*Chr2_23_IS407A_A                    | D-R | Bm_fmh       | 2  | 520261-521496 | Chr2 | IS407A | AATGG/TGACCTGCCCC~TAC ATGAAGAAGCGCTTTACGCGCCCGCAAGCCAAACGCG;TGTTGGCCAGGGACTTTGCTAGAA(ATCGGCC/CCAT   | ATCG | N    |
| 5*Chr2_16_IS407A;5*Chr2_55_IS407A_A   | D-R | Bm_ATCC_103  | 5  | 520536-521771 | Chr2 | IS407A | CGATC/TGACCTGCCCC~TAC ATGAAGAAGCGCTTTACGCGCCCGCAAGCCAAACGCG;TGTTGGCCAGGGACTTTGCTAGAA(CGTAAATCC/CCGC | CGTA | N    |
| 8*Chr2_22_IS407A;8*Chr2_52_IS407A_A   | R   | Bm_200272128 | 8  | 529400-530635 | Chr2 | IS407A | GAATT/TGACCTGCCCC~TAC ATGAAGAAGCGCTTTACGCGCCCGCAAGCCAAACGCG;TGTTGGCCAGGGACTTTGCTAGAA(CGTACAG/GGAT   | CGTC | N    |
| 9*Chr2_31b_IS407;9*Chr2_56_IS407A_A   | D-R | Bm_SAVP1     | 9  | 535045-536280 | Chr2 | IS407A | GAAAG/TGACCTGCCCC~TAC ATGAAGAAGCGCTTTACGCGCCCGCAAGCCAAACGCG;TGTTGGCCAGGGACTTTGCTAGAA(CATCGGC/GATC   | CATC | N    |
| 10*Chr2_15b_IS407A_A                  | R   | Bm_PRL20     | 10 | 541189-542423 | Chr2 | IS407A | CGCCG/TGACCTGCCCC~TAC ATGAAGAAGCGCTTTACGCGCCCGCAAGCCAAACGCG;TGTTGGCCAGGGACTTTGCTAGAA(ACAGTTTT GCTT  | ACAG | N    |
| 10*Chr2_16_IS407;10*Chr2_35_IS407A_A  | D-R | Bm_PRL20     | 10 | 545708-546943 | Chr2 | IS407A | CGATC/TGACCTGCCCC~TAC ATGAAGAAGCGCTTTACGCGCCCGCAAGCCAAACGCG;TGTTGGCCAGGGACTTTGCTAGAA(CGACGAA/CATC   | CCAG | N    |
| 5*Chr2_34_IS407A;5*Chr2_54_IS407A_A   | D-R | Bm_ATCC_103  | 5  | 547403-548638 | Chr2 | IS407A | CGCGG/TGACCTGCCCC~TAC ATGAAGAAGCGCTTTACGCGCCCGCAAGCCAAACGCG;TGTTGGCCAGGGACTTTGCTAGAA(GGATAGA/GAGG   | GGAT | N    |
| 3*Chr2_23_IS407A_A                    | D-R | Bm_JHU       | 3  | 548996-550231 | Chr2 | IS407A | AATGG/TGACCTGCCCC~TAC ATGAAGAAGCGCTTTACGCGCCCGCAAGCCAAACGCG;TGTTGGCCAGGGACTTTGCTAGAA(ATCGGCC/CCAT   | ATCG | N    |
| 4*Chr2_15b_IS407A_A                   | R   | Bm_gb8_horse | 4  | 559127-560362 | Chr2 | IS407A | CGCCG/TGACCTGCCCC~TAC ATGAAGAAGCGCTTTACGCGCCCGCAAGCCAAACGCG;TGTTGGCCAGGGACTTTGCTAGAA(ACAGTTTT GCTT  | ACAG | N    |
| 1*Chr2_15b_IS407A_A                   | R   | Bm_ATCC_233  | 1  | 560460-561695 | Chr2 | IS407A | CGCCG/TGACCTGCCCC~TAC ATGAAGAAGCGCTTTACGCGCCCGCAAGCCAAACGCG;TGTTGGCCAGGGACTTTGCTAGAA(ACAGTTTT GCTT  | ACAG | N    |
| 4*Chr2_16_IS407A;4*Chr2_55_IS407A_A   | D-R | Bm_gb8_horse | 4  | 563814-565049 | Chr2 | IS407A | CGATC/TGACCTGCCCC~TAC ATGAAGAAGCGCTTTACGCGCCCGCAAGCCAAACGCG;TGTTGGCCAGGGACTTTGCTAGAA(CGTAAATCC/CCGC | CGTA | N    |
| 1*Chr2_16_IS407A;1*Chr2_55_IS407A_A   | D-R | Bm_ATCC_233  | 1  | 565147-566382 | Chr2 | IS407A | CGATC/TGACCTGCCCC~TAC ATGAAGAAGCGCTTTACGCGCCCGCAAGCCAAACGCG;TGTTGGCCAGGGACTTTGCTAGAA(CGTAAATCC/CCGC | CGTA | N    |
| 6*Chr2_26_IS407A;6*Chr2_27_IS407A_A   | D   | Bm_NCTC_102  | 6  | 56520-57755   | Chr2 | IS407A | TTAC/TGACCTGCCCC~TAC ATGAAGAAGCGCTTTACGCGCCCGCAAGCCAAACGCG;TGTTGGCCAGGGACTTTGCTAGAA(CTCGGGC/GATG    | CTCG | N    |
| 7*Chr2_58_IS407A_A                    | N   | Bm_NCTC_102  | 7  | 566054-567289 | Chr2 | IS407A | CGCGG/TGACCTGCCCC~TAC ATGAAGAAGCGCTTTACGCGCCCGCAAGCCAAACGCG;TGTTGGCCAGGGACTTTGCTAGAA(ATCCGGG/CGAC   | ATCC | N    |
| 2*Chr2_15b_IS407A_A                   | R   | Bm_fmh       | 2  | 571425-572660 | Chr2 | IS407A | CGCCG/TGACCTGCCCC~TAC ATGAAGAAGCGCTTTACGCGCCCGCAAGCCAAACGCG;TGTTGGCCAGGGACTTTGCTAGAA(ACAGTTTT GCTT  | ACAG | N    |
| 2*Chr2_16_IS407A;2*Chr2_55_IS407A_A   | D-R | Bm_fmh       | 2  | 576112-577347 | Chr2 | IS407A | CGATC/TGACCTGCCCC~TAC ATGAAGAAGCGCTTTACGCGCCCGCAAGCCAAACGCG;TGTTGGCCAGGGACTTTGCTAGAA(CGTAAATCC/CCGC | CGTA | N    |
| 4*Chr2_34_IS407A;4*Chr2_54_IS407A_A   | D-R | Bm_gb8_horse | 4  | 590631-591866 | Chr2 | IS407A | CGCGG/TGACCTGCCCC~TAC ATGAAGAAGCGCTTTACGCGCCCGCAAGCCAAACGCG;TGTTGGCCAGGGACTTTGCTAGAA(GGATAGA/GAGG   | GGAT | N    |
| 1*Chr2_34_IS407A;1*Chr2_54_IS407A_A   | D-R | Bm_ATCC_233  | 1  | 592085-596320 | Chr2 | IS407A | CGCGG/TGACCTGCCCC~TAC ATGAAGAAGCGCTTTACGCGCCCGCAAGCCAAACGCG;TGTTGGCCAGGGACTTTGCTAGAA(GGATAGA/GAGG   | GGAT | N    |
| 3*Chr2_15b_IS407A_A                   | R   | Bm_JHU       | 3  | 600352-601587 | Chr2 | IS407A | CGCCG/TGACCTGCCCC~TAC ATGAAGAAGCGCTTTACGCGCCCGCAAGCCAAACGCG;TGTTGGCCAGGGACTTTGCTAGAA(ACAGTTTT GCTT  | ACAG | N    |
| 9*Chr2_10a_IS407;9*Chr2_44b_IS407A_A  | D-R | Bm_SAVP1     | 9  | 6022-7257     | Chr2 | IS407A | GACAG/TGACCTGCCCC~TAC ATGAAGAAGCGCTTTACGCGCCCGCAAGCCAAACGCG;TGTTGGCCAGGGACTTTGCTAGAA(AAGCGT/CGCC    | AAGC | N    |
| 2*Chr2_34_IS407A;2*Chr2_54_IS407A_A   | D-R | Bm_fmh       | 2  | 603189-604424 | Chr2 | IS407A | CGCGG/TGACCTGCCCC~TAC ATGAAGAAGCGCTTTACGCGCCCGCAAGCCAAACGCG;TGTTGGCCAGGGACTTTGCTAGAA(GGATAGA/GAGG   | GGAT | N    |
| 3*Chr2_16_IS407A;3*Chr2_55_IS407A_A   | D-R | Bm_JHU       | 3  | 605039-606274 | Chr2 | IS407A | CGATC/TGACCTGCCCC~TAC ATGAAGAAGCGCTTTACGCGCCCGCAAGCCAAACGCG;TGTTGGCCAGGGACTTTGCTAGAA(CGTAAATCC/CCGC | CGTA | N    |
| 6*Chr2_40_IS407A_A                    | N   | Bm_NCTC_102  | 6  | 607939-609174 | Chr2 | IS407A | CGCGT/TGACCTGCCCC~TAC ATGAAGAAGCGCTTTACGCGCCCGCAAGCCAAACGCG;TGTTGGCCAGGGACTTTGCTAGAA(CGAACTG/CAGG   | CGAA | N    |
| 8*Chr2_51_IS407A_A                    | N   | Bm_200272128 | 8  | 608682-609917 | Chr2 | IS407A | CGGCC/TGACCTGCCCC~TAC ATGAAGAAGCGCTTTACGCGCCCGCAAGCCAAACGCG;TGTTGGCCAGGGACTTTGCTAGAA(GCCGCGC/GGCG   | GGCG | Y    |
| 5*Chr2_35_IS407A_A                    | N   | Bm_ATCC_103  | 5  | 612093-613328 | Chr2 | IS407A | CGATC/TGACCTGCCCC~TAC ATGAAGAAGCGCTTTACGCGCCCGCAAGCCAAACGCG;TGTTGGCCAGGGACTTTGCTAGAA(CATCAGC/CATC   | CATC | Y    |



|                                               |     |              |    |               |      |        |                                                                                                     |      |   |
|-----------------------------------------------|-----|--------------|----|---------------|------|--------|-----------------------------------------------------------------------------------------------------|------|---|
| 6*Chr2_10a_IS407;6*Chr2_13a_IS407_A           | R   | Bm_NCTC_102; | 6  | 6183-7418     | Chr2 | IS407A | GAGCC TGACCTGCCCC~TAC ATGAAGAAGCGCTTTACGCGCCCGCAAGCCAAACGCG; TGTTGGCCAGGGACTTTGCTAGAA(AAGCCGT)CTCG  | AAGC | N |
| 10*Chr2_37_IS407;10*Chr2_57a_IS407A_A         | D-R | Bm_PRL20     | 10 | 622831-624066 | Chr2 | IS407A | CCCTT(TGACCTGCCCC~TAC ATGAAGAAGCGCTTTACGCGCCCGCAAGCCAAACGCG; TGTTGGCCAGGGACTTTGCTAGAA(CGCCCG)ACCT   | CGCC | N |
| 8*Chr2_49_IS407A_A                            | N   | Bm_200272128 | 8  | 630594-631829 | Chr2 | IS407A | CCGAC TGACCTGCCCC~TAC ATGAAGAAGCGCTTTACGCGCCCGCAAGCCAAACGCG; TGTTGGCCAGGGACTTTGCTAGAA(AGCGACG)AGCG  | AGCG | Y |
| 3*Chr2_34_IS407A_3*Chr2_54_IS407A_A           | D-R | Bm_JHU       | 3  | 631977-633212 | Chr2 | IS407A | CGCGG TGACCTGCCCC~TAC ATGAAGAAGCGCTTTACGCGCCCGCAAGCCAAACGCG; TGTTGGCCAGGGACTTTGCTAGAA(GGATAGA)GAGG  | GGAT | N |
| 5*Chr2_83_IS407A_C                            | N   | Bm_ATCC_103f | 5  | 6354-7589     | Chr2 | IS407A | ACGGC TGACCTGCCCC~TAC ATGAAGAAGCGCTTTACGCGCCCGCAAGCCAAACGCG; TGTTGGCCAGGGACTTTGCTAGAA(CGGCAG)CGGG   | CGGG | Y |
| 9*Chr2_57a_IS407A_A                           | D-R | Bm_SAVP1     | 9  | 639673-640908 | Chr2 | IS407A | CCCTT(TGACCTGCCCC~TAC ATGAAGAAGCGCTTTACGCGCCCGCAAGCCAAACGCG; TGTTGGCCAGGGACTTTGCTAGAA(CAGAGAC)ACCT  | CAGA | N |
| 4*Chr2_35_IS407A_A                            | N   | Bm_gb8_horse | 4  | 655266-656501 | Chr2 | IS407A | CGATC(TGACCTGCCCC~TAC ATGAAGAAGCGCTTTACGCGCCCGCAAGCCAAACGCG; TGTTGGCCAGGGACTTTGCTAGAA(CATCAGC)CATC  | CATC | Y |
| 1*Chr2_35_IS407A_A                            | N   | Bm_ATCC_233f | 1  | 656707-657942 | Chr2 | IS407A | CGATC(TGACCTGCCCC~TAC ATGAAGAAGCGCTTTACGCGCCCGCAAGCCAAACGCG; TGTTGGCCAGGGACTTTGCTAGAA(CATCAGC)CATC  | CATC | Y |
| 8*Chr2_48_IS407A_A                            | N   | Bm_200272128 | 8  | 658424-659659 | Chr2 | IS407A | CATT(CGACCTGCCCC~TAC ATGAAGAAGCGCTTTACGCGCCCGCAAGCCAAACGCG; TGTTGGCCAGGGACTTTGCTAGAA(GCCGCT)CCGG    | GCCG | Y |
| 2*Chr2_35_IS407A_A                            | N   | Bm_fmh       | 2  | 668220-669455 | Chr2 | IS407A | CGATC(TGACCTGCCCC~TAC ATGAAGAAGCGCTTTACGCGCCCGCAAGCCAAACGCG; TGTTGGCCAGGGACTTTGCTAGAA(CATCAGC)CATC  | CATC | Y |
| 6*Chr2_38_IS407A_6*Chr2_56_IS407A_A           | D-R | Bm_NCTC_102; | 6  | 675587-676822 | Chr2 | IS407A | GTCCT(TGACCTGCCCC~TAC ATGAAGAAGCGCTTTACGCGCCCGCAAGCCAAACGCG; TGTTGGCCAGGGACTTTGCTAGAA(CATCGGC)GAAC  | CATC | N |
| 9*Chr2_23_IS407A_A                            | D-R | Bm_SAVP1     | 9  | 686954-688189 | Chr2 | IS407A | AATGG(TGACCTGCCCC~TAC ATGAAGAAGCGCTTTACGCGCCCGCAAGCCAAACGCG; TGTTGGCCAGGGACTTTGCTAGAA(ATCGGCC)CCAT  | ATCG | N |
| 5*Chr2_37_IS407A_5*Chr2_57a_IS407A_A          | D-R | Bm_ATCC_103f | 5  | 689319-690554 | Chr2 | IS407A | CCCTT(TGACCTGCCCC~TAC ATGAAGAAGCGCTTTACGCGCCCGCAAGCCAAACGCG; TGTTGGCCAGGGACTTTGCTAGAA(CGCCCG)ACCT   | CGCC | N |
| 3*Chr2_35_IS407A_A                            | N   | Bm_JHU       | 3  | 696599-697834 | Chr2 | IS407A | CGATC(TGACCTGCCCC~TAC ATGAAGAAGCGCTTTACGCGCCCGCAAGCCAAACGCG; TGTTGGCCAGGGACTTTGCTAGAA(CATCAGC)CATC  | CATC | Y |
| 7*Chr2_13b_IS407A_7*Chr2_57b_IS407A_A         | R   | Bm_NCTC_102; | 7  | 714504-715739 | Chr2 | IS407A | CAAGC TGACCTGCCCC~TAC ATGAAGAAGCGCTTTACGCGCCCGCAAGCCAAACGCG; TGTTGGCCAGGGACTTTGCTAGAA(ATCTTCCC)GGTT | ATCT | N |
| 7*Chr2_6_IS407A_A                             | N   | Bm_NCTC_102; | 7  | 721251-722486 | Chr2 | IS407A | GCGCA TGACCTGCCCC~TAC ATGAAGAAGCGCTTTACGCGCCCGCAAGCCAAACGCG; TGTTGGCCAGGGACTTTGCTAGAA(CGTGAAC)CGTG  | CGTG | Y |
| 10*Chr2_31b_IS407_10*Chr2_56_IS407A_A         | D-R | Bm_PRL20     | 10 | 726908-728143 | Chr2 | IS407A | GAACG TGACCTGCCCC~TAC ATGAAGAAGCGCTTTACGCGCCCGCAAGCCAAACGCG; TGTTGGCCAGGGACTTTGCTAGAA(CATCGGC)GATC  | CATC | N |
| 4*Chr2_37_IS407A_4*Chr2_57a_IS407A_A          | D-R | Bm_gb8_horse | 4  | 732439-733674 | Chr2 | IS407A | CCCTT(TGACCTGCCCC~TAC ATGAAGAAGCGCTTTACGCGCCCGCAAGCCAAACGCG; TGTTGGCCAGGGACTTTGCTAGAA(CGCCCG)ACCT   | CGCC | N |
| 1*Chr2_37_IS407A_1*Chr2_57a_IS407A_A          | D-R | Bm_ATCC_233f | 1  | 733880-735115 | Chr2 | IS407A | CCCTT(TGACCTGCCCC~TAC ATGAAGAAGCGCTTTACGCGCCCGCAAGCCAAACGCG; TGTTGGCCAGGGACTTTGCTAGAA(CGCCCG)ACCT   | CGCC | N |
| 2*Chr2_37_IS407A_2*Chr2_57a_IS407A_A          | D-R | Bm_fmh       | 2  | 746706-747941 | Chr2 | IS407A | CCCTT(TGACCTGCCCC~TAC ATGAAGAAGCGCTTTACGCGCCCGCAAGCCAAACGCG; TGTTGGCCAGGGACTTTGCTAGAA(CGCCCG)ACCT   | CGCC | N |
| 10*Chr2_9a_IS407;10*Chr2_24_IS407_10*Chr2_32a | D-R | Bm_PRL20     | 10 | 749164-750399 | Chr2 | IS407A | CGGGA TGACCTGCCCC~TAC ATGAAGAAGCGCTTTACGCGCCCGCAAGCCAAACGCG; TGTTGGCCAGGGACTTTGCTAGAA(CAAGCG)CCAC   | CAAG | N |
| 9*Chr2_19_IS407A_B                            | N   | Bm_SAVP1     | 9  | 764597-765832 | Chr2 | IS407A | TTATG(TGACCTGCCCC~TAC ATGAAGAAGCGCTTTACGCGCCCGCAAGCCAAACGCG; TGTTGGCCAGGGACTTTGCTAGAA(GGGTATT)GGGT  | GGGT | Y |
| 8*Chr2_44a_IS407A_A                           | N   | Bm_200272128 | 8  | 769677-770912 | Chr2 | IS407A | GACAG TGACCTGCCCC~TAC ATGAAGAAGCGCTTTACGCGCCCGCAAGCCAAACGCG; TGTTGGCCAGGGACTTTGCTAGAA(AGGGGTA)CGCC  | AGGG | N |
| 3*Chr2_37_IS407A_3*Chr2_57a_IS407A_A          | D-R | Bm_JHU       | 3  | 773773-775008 | Chr2 | IS407A | CCCTT(TGACCTGCCCC~TAC ATGAAGAAGCGCTTTACGCGCCCGCAAGCCAAACGCG; TGTTGGCCAGGGACTTTGCTAGAA(CGCCCG)ACCT   | CGCC | N |
| 10*Chr2_25_IS407A_C                           | N   | Bm_PRL20     | 10 | 778318-779553 | Chr2 | IS407A | GGTTA(TGACCTGCCCC~TAC ATGAAGAAGCGCTTTACGCGCCCGCAAGCCAAACGCG; TGTTGGCCAGGGACTTTGCTAGAA(ATCAGCG)ATCG  | ATCG | Y |
| 6*Chr2_37_IS407A_6*Chr2_57a_IS407A_A          | D-R | Bm_NCTC_102; | 6  | 780241-781476 | Chr2 | IS407A | CCCTT(TGACCTGCCCC~TAC ATGAAGAAGCGCTTTACGCGCCCGCAAGCCAAACGCG; TGTTGGCCAGGGACTTTGCTAGAA(CGCCCG)ACCT   | CGCC | N |
| 10*Chr2_26_IS407;10*Chr2_27_IS407A_A          | D   | Bm_PRL20     | 10 | 783043-784278 | Chr2 | IS407A | GGCGT TGACCTGCCCC~TAC ATGAAGAAGCGCTTTACGCGCCCGCAAGCCAAACGCG; TGTTGGCCAGGGACTTTGCTAGAA(CTCGGG)GAAA   | CTCG | N |
| 5*Chr2_44b_IS407_5*Chr2_56_IS407A_A           | D-R | Bm_ATCC_103f | 5  | 793863-795098 | Chr2 | IS407A | GACAG TGACCTGCCCC~TAC ATGAAGAAGCGCTTTACGCGCCCGCAAGCCAAACGCG; TGTTGGCCAGGGACTTTGCTAGAA(CATCGGC)CGCC  | CATC | N |
| 9*Chr2_15a_IS407;9*Chr2_18_IS407A_A           | D-R | Bm_SAVP1     | 9  | 799543-800778 | Chr2 | IS407A | AGACC TGACCTGCCCC~TAC ATGAAGAAGCGCTTTACGCGCCCGCAAGCCAAACGCG; TGTTGGCCAGGGACTTTGCTAGAA(GGATCAG)AGAT  | GGAT | N |
| 4*Chr2_2_IS407A_4*Chr2_73_IS407A_A            | D-R | Bm_gb8_horse | 4  | 80307-81542   | Chr2 | IS407A | CGCTG(TGACCTGCCCC~TAC ATGAAGAAGCGCTTTACGCGCCCGCAAGCCAAACGCG; TGTTGGCCAGGGACTTTGCTAGAA(CAACGCA)GTGT  | CAAC | N |
| 1*Chr2_2_IS407A_1*Chr2_73_IS407A_A            | D-R | Bm_ATCC_233f | 1  | 80328-81563   | Chr2 | IS407A | CGCTG(TGACCTGCCCC~TAC ATGAAGAAGCGCTTTACGCGCCCGCAAGCCAAACGCG; TGTTGGCCAGGGACTTTGCTAGAA(CAACGCA)GTGT  | CAAC | N |
| 7*Chr2_2_IS407A_7*Chr2_73_IS407A_A            | D-R | Bm_NCTC_102; | 7  | 81697-82932   | Chr2 | IS407A | CGCTG(TGACCTGCCCC~TAC ATGAAGAAGCGCTTTACGCGCCCGCAAGCCAAACGCG; TGTTGGCCAGGGACTTTGCTAGAA(CAACGCA)GTGT  | CAAC | N |
| 5*Chr2_45_IS407A_B                            | N   | Bm_ATCC_103f | 5  | 828859-830094 | Chr2 | IS407A | GCCGC TGACCTGCCCC~TAC ATGAAGAAGCGCTTTACGCGCCCGCAAGCCAAACGCG; TGTTGGCCAGGGACTTTGCTAGAA(GAAAGG)GGGC   | GAAA | N |
| 4*Chr2_24_IS407A_4*Chr2_56_IS407A_A           | D-R | Bm_gb8_horse | 4  | 836729-837964 | Chr2 | IS407A | CGGGA TGACCTGCCCC~TAC ATGAAGAAGCGCTTTACGCGCCCGCAAGCCAAACGCG; TGTTGGCCAGGGACTTTGCTAGAA(CATCGGC)CCAC  | CATC | N |
| 1*Chr2_24_IS407A_1*Chr2_56_IS407A_A           | D-R | Bm_ATCC_233f | 1  | 838658-839893 | Chr2 | IS407A | CGGGA TGACCTGCCCC~TAC ATGAAGAAGCGCTTTACGCGCCCGCAAGCCAAACGCG; TGTTGGCCAGGGACTTTGCTAGAA(CATCGGC)CCAC  | CATC | N |
| 7*Chr2_9a_IS407A_A                            | N   | Bm_NCTC_102; | 7  | 840090-841325 | Chr2 | IS407A | CATGC(TGACCTGCCCC~TAC ATGAAGAAGCGCTTTACGCGCCCGCAAGCCAAACGCG; TGTTGGCCAGGGACTTTGCTAGAA(CAAGCAG)CAAG  | CAAG | Y |
| 10*Chr2_9b_IS407;10*Chr2_31a_IS407A_A         | R   | Bm_PRL20     | 10 | 845139-846374 | Chr2 | IS407A | CATGC(TGACCTGCCCC~TAC ATGAAGAAGCGCTTTACGCGCCCGCAAGCCAAACGCG; TGTTGGCCAGGGACTTTGCTAGAA(GATCGAG)CAAG  | GATC | N |
| 2*Chr2_24_IS407A_2*Chr2_56_IS407A_A           | D-R | Bm_JHU       | 2  | 852556-853791 | Chr2 | IS407A | CGGGA TGACCTGCCCC~TAC ATGAAGAAGCGCTTTACGCGCCCGCAAGCCAAACGCG; TGTTGGCCAGGGACTTTGCTAGAA(CATCGGC)CCAC  | CATC | N |
| 6*Chr2_35_IS407A_A                            | N   | Bm_NCTC_102; | 6  | 859532-860767 | Chr2 | IS407A | CGATC(TGACCTGCCCC~TAC ATGAAGAAGCGCTTTACGCGCCCGCAAGCCAAACGCG; TGTTGGCCAGGGACTTTGCTAGAA(CATCAGC)CATC  | CATC | Y |
| 7*Chr2_10a_IS407;7*Chr2_13a_IS407A_A          | R   | Bm_NCTC_102; | 7  | 862482-863717 | Chr2 | IS407A | GAGCC TGACCTGCCCC~TAC ATGAAGAAGCGCTTTACGCGCCCGCAAGCCAAACGCG; TGTTGGCCAGGGACTTTGCTAGAA(AAGCCGT)CTCG  | AAGC | N |
| 4*Chr2_9b_IS407A_4*Chr2_26_IS407A_A           | D-R | Bm_gb8_horse | 4  | 865037-866272 | Chr2 | IS407A | CATGC(TGACCTGCCCC~TAC ATGAAGAAGCGCTTTACGCGCCCGCAAGCCAAACGCG; TGTTGGCCAGGGACTTTGCTAGAA(CTGGATA)CAAG  | CTGG | N |
| 10*Chr2_10a_IS407;10*Chr2_13a_IS407A_A        | D-R | Bm_PRL20     | 10 | 867383-868618 | Chr2 | IS407A | GAGCC TGACCTGCCCC~TAC ATGAAGAAGCGCTTTACGCGCCCGCAAGCCAAACGCG; TGTTGGCCAGGGACTTTGCTAGAA(AAGCCGT)CTCG  | AAGC | N |
| 1*Chr2_9b_IS407A_1*Chr2_26_IS407A_A           | D-R | Bm_ATCC_233f | 1  | 869730-870965 | Chr2 | IS407A | CATGC(TGACCTGCCCC~TAC ATGAAGAAGCGCTTTACGCGCCCGCAAGCCAAACGCG; TGTTGGCCAGGGACTTTGCTAGAA(CTGGATA)CAAG  | CTGG | N |
| 8*Chr2_42_IS407A_A                            | N   | Bm_200272128 | 8  | 875084-876319 | Chr2 | IS407A | ATGCA(TGACCTGCCCC~TAC ATGAAGAAGCGCTTTACGCGCCCGCAAGCCAAACGCG; TGTTGGCCAGGGACTTTGCTAGAA(CTCGGC)CTCG   | CTCG | Y |
| 7*Chr2_10b_IS407A_A                           | R   | Bm_NCTC_102; | 7  | 876441-877676 | Chr2 | IS407A | GCTC(TGACCTGCCCC~TAC ATGAAGAAGCGCTTTACGCGCCCGCAAGCCAAACGCG; TGTTGGCCAGGGACTTTGCTAGAA(CCGGGC)CGGG    | CCGG | N |
| 10*Chr2_32b_IS407A_C                          | R   | Bm_PRL20     | 10 | 878187-878956 | Chr2 | IS407A | GTTAA(TGACCTGCCCC~TAC ATGAAGAAGCGCTTTACGCGCCCGCAAGCCAAACGCG; TGTTGGCC# #contig_br AGTG #con         | N.D. | N |
| 7*Chr2_38_IS407A_A                            | D-R | Bm_NCTC_102; | 7  | 878410-879645 | Chr2 | IS407A | GTCCT(TGACCTGCCCC~TAC ATGAAGAAGCGCTTTACGCGCCCGCAAGCCAAACGCG; TGTTGGCCAGGGACTTTGCTAGAA(GGAGTT)GAA    | GGAG | N |
| 3*Chr2_24_IS407A_3*Chr2_56_IS407A_A           | D-R | Bm_JHU       | 3  | 881257-882492 | Chr2 | IS407A | CGGGA TGACCTGCCCC~TAC ATGAAGAAGCGCTTTACGCGCCCGCAAGCCAAACGCG; TGTTGGCCAGGGACTTTGCTAGAA(CATCGGC)CCAC  | CATC | N |
| 2*Chr2_9b_IS407A_2*Chr2_26_IS407A_A           | D-R | Bm_fmh       | 2  | 883719-884954 | Chr2 | IS407A | CATGC(TGACCTGCCCC~TAC ATGAAGAAGCGCTTTACGCGCCCGCAAGCCAAACGCG; TGTTGGCCAGGGACTTTGCTAGAA(CTGGATA)CAAG  | CTGG | N |
| 4*Chr2_10a_IS407A_A                           | N   | Bm_gb8_horse | 4  | 887110-888345 | Chr2 | IS407A | GTTAA(TGACCTGCCCC~TAC ATGAAGAAGCGCTTTACGCGCCCGCAAGCCAAACGCG; TGTTGGCCAGGGACTTTGCTAGAA(AAGCCGT)AGTG  | AAGC | N |
| 1*Chr2_10a_IS407A_A                           | N   | Bm_ATCC_233f | 1  | 891974-893209 | Chr2 | IS407A | GTTAA(TGACCTGCCCC~TAC ATGAAGAAGCGCTTTACGCGCCCGCAAGCCAAACGCG; TGTTGGCCAGGGACTTTGCTAGAA(AAGCCGT)AGTG  | AAGC | N |
| 10*Chr2_33_IS407;10*Chr2_53_IS407A_A          | D-R | Bm_PRL20     | 10 | 894908-896143 | Chr2 | IS407A | GCGAC TGACCTGCCCC~TAC ATGAAGAAGCGCTTTACGCGCCCGCAAGCCAAACGCG; TGTTGGCCAGGGACTTTGCTAGAA(GTCCAG)CCTG   | GTCC | N |
| 2*Chr2_2_IS407A_2*Chr2_73_IS407A_A            | D-R | Bm_fmh       | 2  | 89553-90788   | Chr2 | IS407A | CGCTG(TGACCTGCCCC~TAC ATGAAGAAGCGCTTTACGCGCCCGCAAGCCAAACGCG; TGTTGGCCAGGGACTTTGCTAGAA(CAACGCA)GTGT  | CAAC | N |
| 4*Chr2_13a_IS407A_A                           | R   | Bm_gb8_horse | 4  | 903023-904258 | Chr2 | IS407A | GAGCC TGACCTGCCCC~TAC ATGAAGAAGCGCTTTACGCGCCCGCAAGCCAAACGCG; TGTTGGCCAGGGACTTTGCTAGAA(CCGGGC)CTCG   | CCGG | N |
| 4*Chr2_53_IS407A_A                            | D-R | Bm_gb8_horse | 4  | 904992-906227 | Chr2 | IS407A | GCGAC TGACCTGCCCC~TAC ATGAAGAAGCGCTTTACGCGCCCGCAAGCCAAACGCG; TGTTGGCCAGGGACTTTGCTAGAA(GGAGTT)CCTG   | GGAG | N |
| 2*Chr2_10a_IS407A_A                           | N   | Bm_fmh       | 2  | 905698-906933 | Chr2 | IS407A | GTTAA(TGACCTGCCCC~TAC ATGAAGAAGCGCTTTACGCGCCCGCAAGCCAAACGCG; TGTTGGCCAGGGACTTTGCTAGAA(AAGCCGT)AGTG  | AAGC | N |
| 5*Chr2_44a_IS407A_A                           | R   | Bm_ATCC_103f | 5  | 906115-907350 | Chr2 | IS407A | CGATC(TGACCTGCCCC~TAC ATGAAGAAGCGCTTTACGCGCCCGCAAGCCAAACGCG; TGTTGGCCAGGGACTTTGCTAGAA(AGGGGTA)GCGG  | AGGG | N |
| 3*Chr2_2_IS407A_3*Chr2_73_IS407A_A            | D-R | Bm_JHU       | 3  | 90720-91955   | Chr2 | IS407A | CGCTG(TGACCTGCCCC~TAC ATGAAGAAGCGCTTTACGCGCCCGCAAGCCAAACGCG; TGTTGGCCAGGGACTTTGCTAGAA(CAACGCA)GTGT  | CAAC | N |

|                                       |     |              |                  |      |        |                                                                                                      |      |   |
|---------------------------------------|-----|--------------|------------------|------|--------|------------------------------------------------------------------------------------------------------|------|---|
| 1*Chr2_13a_IS407A_A                   | R   | Bm_ATCC_2334 | 1 907887-909122  | Chr2 | IS407A | GAGCC TGACCTGCCCC~TAC ATGAAGAAGCGCTTTACGCGCCCGCAAGCCAAACGCG; TGTTGGCCAGGGACTTTGCTAGAA( CCGGGCCG CTGG | CCGG | N |
| 1*Chr2_53_IS407A_A                    | D-R | Bm_ATCC_2334 | 1 909856-911091  | Chr2 | IS407A | GCGAC TGACCTGCCCC~TAC ATGAAGAAGCGCTTTACGCGCCCGCAAGCCAAACGCG; TGTTGGCCAGGGACTTTGCTAGAA( GGAGTTC1CTG   | GGAG | N |
| 10*Chr2_21_IS407A_10*Chr2_52_IS407A_A | N   | Bm_PRL20     | 10 920084-921319 | Chr2 | IS407A | GAATT1TGACCTGCCCC~TAC ATGAAGAAGCGCTTTACGCGCCCGCAAGCCAAACGCG; TGTTGGCCAGGGACTTTGCTAGAA( CCGTACC GGAT  | CCGT | N |
| 2*Chr2_13a_IS407A_A                   | R   | Bm_fmh       | 2 922047-923283  | Chr2 | IS407A | GAGCC TGACCTGCCCC~TAC ATGAAGAAGCGCTTTACGCGCCCGCAAGCCAAACGCG; TGTTGGCCAGGGACTTTGCTAGAA( CCGGGCCG CTGG | CCGG | N |
| 2*Chr2_53_IS407A_A                    | D-R | Bm_fmh       | 2 924017-925252  | Chr2 | IS407A | GCGAC TGACCTGCCCC~TAC ATGAAGAAGCGCTTTACGCGCCCGCAAGCCAAACGCG; TGTTGGCCAGGGACTTTGCTAGAA( GGAGTTC1CTG   | GGAG | N |
| 6*Chr2_34_IS407A_6*Chr2_54_IS407A_A   | D-R | Bm_NCTC_1024 | 6 924390-925625  | Chr2 | IS407A | CGCGG TGACCTGCCCC~TAC ATGAAGAAGCGCTTTACGCGCCCGCAAGCCAAACGCG; TGTTGGCCAGGGACTTTGCTAGAA( GGATAGAI GAGG | GGAT | N |
| 8*Chr2_13a_IS407A_A                   | R   | Bm_200272128 | 8 92450-93685    | Chr2 | IS407A | GAGCC TGACCTGCCCC~TAC ATGAAGAAGCGCTTTACGCGCCCGCAAGCCAAACGCG; TGTTGGCCAGGGACTTTGCTAGAA( AAGCCGT1CTG   | AAGC | N |
| 4*Chr2_40_IS407A_A                    | N   | Bm_gb8_horse | 4 930168-931403  | Chr2 | IS407A | GAATT1TGACCTGCCCC~TAC ATGAAGAAGCGCTTTACGCGCCCGCAAGCCAAACGCG; TGTTGGCCAGGGACTTTGCTAGAA( CCGTACC GGAT  | CCGT | N |
| 1*Chr2_52_IS407A_A                    | N   | Bm_ATCC_2334 | 1 935032-936267  | Chr2 | IS407A | GAATT1TGACCTGCCCC~TAC ATGAAGAAGCGCTTTACGCGCCCGCAAGCCAAACGCG; TGTTGGCCAGGGACTTTGCTAGAA( CCGTACC GGAT  | CCGT | N |
| 3*Chr2_9b_IS407A_3*Chr2_26_IS407A_A   | D-R | Bm_JHU       | 3 944285-945520  | Chr2 | IS407A | CATGC1TGACCTGCCCC~TAC ATGAAGAAGCGCTTTACGCGCCCGCAAGCCAAACGCG; TGTTGGCCAGGGACTTTGCTAGAA( CTGGATAI CAAG | CTGG | N |
| 7*Chr2_40_IS407A_A                    | N   | Bm_NCTC_1024 | 7 946055-947290  | Chr2 | IS407A | CGCGT1TGACCTGCCCC~TAC ATGAAGAAGCGCTTTACGCGCCCGCAAGCCAAACGCG; TGTTGGCCAGGGACTTTGCTAGAA( CGAACTGI CAGG | CGAA | N |
| 2*Chr2_52_IS407A_A                    | N   | Bm_fmh       | 2 949193-950428  | Chr2 | IS407A | GAATT1TGACCTGCCCC~TAC ATGAAGAAGCGCTTTACGCGCCCGCAAGCCAAACGCG; TGTTGGCCAGGGACTTTGCTAGAA( CCGTACC GGAT  | CCGT | N |
| 6*Chr2_17_IS407A_6*Chr2_55_IS407A_A   | D-R | Bm_NCTC_1024 | 6 950458-951693  | Chr2 | IS407A | AGCGT1TGACCTGCCCC~TAC ATGAAGAAGCGCTTTACGCGCCCGCAAGCCAAACGCG; TGTTGGCCAGGGACTTTGCTAGAA( GTGCGT1GCC    | GTGC | N |
| 6*Chr2_15b_IS407A_A                   | R   | Bm_NCTC_1024 | 6 966292-967527  | Chr2 | IS407A | CGCGC TGACCTGCCCC~TAC ATGAAGAAGCGCTTTACGCGCCCGCAAGCCAAACGCG; TGTTGGCCAGGGACTTTGCTAGAA( ACAGT1TT GCTT | ACAG | N |
| 3*Chr2_10a_IS407A_A                   | N   | Bm_JHU       | 3 967328-968563  | Chr2 | IS407A | GTTAA1TGACCTGCCCC~TAC ATGAAGAAGCGCTTTACGCGCCCGCAAGCCAAACGCG; TGTTGGCCAGGGACTTTGCTAGAA( AAGCCGT1 AGTG | AAGC | N |
| 8*Chr2_40_IS407A_A                    | N   | Bm_200272128 | 8 968920-970155  | Chr2 | IS407A | CGCGT1TGACCTGCCCC~TAC ATGAAGAAGCGCTTTACGCGCCCGCAAGCCAAACGCG; TGTTGGCCAGGGACTTTGCTAGAA( CGAACTGI CAGG | CGAA | N |
| 9*Chr2_3_IS407A_9*Chr2_76_IS407A_A    | D-R | Bm_SAVP1     | 9 977425-978660  | Chr2 | IS407A | AGTCG1TGACCTGCCCC~TAC ATGAAGAAGCGCTTTACGCGCCCGCAAGCCAAACGCG; TGTTGGCCAGGGACTTTGCTAGAA( TCTTCTT1GGT   | TCTT | N |
| 3*Chr2_13a_IS407A_A                   | R   | Bm_JHU       | 3 983241-984476  | Chr2 | IS407A | GAGCC TGACCTGCCCC~TAC ATGAAGAAGCGCTTTACGCGCCCGCAAGCCAAACGCG; TGTTGGCCAGGGACTTTGCTAGAA( CCGGGCCG CTGG | CCGG | N |
| 3*Chr2_53_IS407A_A                    | D-R | Bm_JHU       | 3 986093-987328  | Chr2 | IS407A | GCGAC TGACCTGCCCC~TAC ATGAAGAAGCGCTTTACGCGCCCGCAAGCCAAACGCG; TGTTGGCCAGGGACTTTGCTAGAA( GGAGTTC1CTG   | GGAG | N |

**IS Bma 1**

|                      |   |              |                    |      | 5'-ext | 5'-IR                                            | ORF         | 3'-IR | 3'-ext             | 5'-DR | 3'-DR    | rget duplicates |
|----------------------|---|--------------|--------------------|------|--------|--------------------------------------------------|-------------|-------|--------------------|-------|----------|-----------------|
|                      |   |              |                    |      |        | GTTTCATCGC                                       | GCGATGA ACC |       |                    |       |          |                 |
| 7*Chr2_43_ISBma1_A   | N | Bm_NCTC_1024 | 7 1053553-1054857  | Chr2 | ISBma1 | GCGCT1GGTTCATCGCAGAAAA TTGCTCGATCGCAAGGCAC ACC   |             |       | CAAGGAA, CAAGGAAA  |       | CAAGGAA, | Y               |
| 9*Chr2_79_ISBma1_A   | N | Bm_SAVP1     | 9 1107451-1108755  | Chr2 | ISBma1 | GTTTGI GGTTTCATCGCAGAAAA TTGCTCGATCGCAAGGCAC ACC |             |       | CTTTTTTC, CTTTTTTC |       | CTTTTTTC | Y               |
| 4*Chr2_29_ISBma1_B   | N | Bm_gb8_horse | 4 1169546-1170852  | Chr2 | ISBma1 | GCGCT1GGTTCATCGCAGAAAA TTGCTCGATCGCAAGGCAC ACC   |             |       | AAATTTTT, AAATTTTT |       | AAATTTTT | Y               |
| 1*Chr2_29_ISBma1_B   | N | Bm_ATCC_2334 | 1 1175066-1176372  | Chr2 | ISBma1 | GCGCT1GGTTCATCGCAGAAAA TTGCTCGATCGCAAGGCAC ACC   |             |       | AAATTTTT, AAATTTTT |       | AAATTTTT | Y               |
| 2*Chr2_29_ISBma1_B   | N | Bm_fmh       | 2 1194495-1195801  | Chr2 | ISBma1 | GCGCT1GGTTCATCGCAGAAAA TTGCTCGATCGCAAGGCAC ACC   |             |       | AAATTTTT, AAATTTTT |       | AAATTTTT | Y               |
| 10*Chr2_43_ISBma1_A  | N | Bm_PRL20     | 10 1229130-1230350 | Chr2 | ISBma1 | GCGCT1GGTTCATCGCAGAAAA TTGCTCGATCGCAAGGCAC ACC   |             |       | CAAGGAA, CAAGGAAA  |       | CAAGGAA, | Y               |
| 5*Chr2_69-1_ISBma1_A | N | Bm_ATCC_1034 | 5 125354-125421    | Chr2 | ISBma1 | #IS4071 ~~~~~ ACC                                |             |       | TAAAAAA, #IS407A   |       | TAAAAAA, | N.D.            |
| 3*Chr2_29_ISBma1_B   | N | Bm_JHU       | 3 1258947-1260253  | Chr2 | ISBma1 | GCGCT1GGTTCATCGCAGAAAA TTGCTCGATCGCAAGGCAC ACC   |             |       | AAATTTTT, AAATTTTT |       | AAATTTTT | Y               |
| 5*Chr2_69_ISBma1_A   | N | Bm_ATCC_1034 | 5 126655-127898    | Chr2 | ISBma1 | CAGGC1GGTTCATCGCAGAAAA TTGCTCGATCGCAAGGCAC #     |             |       | #IS407A TAAAAAAA   |       | #IS407A  | N.D.            |
| 6*Chr2_4_ISBma1_B    | N | Bm_NCTC_1024 | 6 1284442-1285746  | Chr2 | ISBma1 | TCCGT1GGTTCATCGCAGAAAA TTGCTCGATCGCAAGGCAC ACC   |             |       | TTTTTAAI, TTTTTTAA |       | TTTTTAA  | Y               |
| 4*Chr2_43_ISBma1_A   | N | Bm_gb8_horse | 4 1304618-1305922  | Chr2 | ISBma1 | GCGCT1GGTTCATCGCAGAAAA TTGCTCGATCGCAAGGCAC ACC   |             |       | CAAGGAA, CAAGGAAA  |       | CAAGGAA, | Y               |
| 1*Chr2_43_ISBma1_A   | N | Bm_ATCC_2334 | 1 1310749-1312053  | Chr2 | ISBma1 | GCGCT1GGTTCATCGCAGAAAA TTGCTCGATCGCAAGGCAC ACC   |             |       | CAAGGAA, CAAGGAAA  |       | CAAGGAA, | Y               |
| 10*Chr2_69_ISBma1_A  | N | Bm_PRL20     | 10 133392-134635   | Chr2 | ISBma1 | CAGGC1GGTTCATCGCAGAAAA TTGCTCGATCGCAAGGCAC #     |             |       | #IS407A TAAAAAAA   |       | #IS407A  | N.D.            |
| 9*Chr2_69-1_ISBma1_A | N | Bm_SAVP1     | 9 1334706-1334773  | Chr2 | ISBma1 | #IS4071 ~~~~~ ACC                                |             |       | TAAAAAA, #IS407A   |       | TAAAAAA, | Y               |
| 2*Chr2_43_ISBma1_A   | N | Bm_fmh       | 2 1335542-1336846  | Chr2 | ISBma1 | GCGCT1GGTTCATCGCAGAAAA TTGCTCGATCGCAAGGCAC ACC   |             |       | CAAGGAA, CAAGGAAA  |       | CAAGGAA, | Y               |
| 9*Chr2_69_ISBma1_A   | N | Bm_SAVP1     | 9 1336007-1337250  | Chr2 | ISBma1 | CAGGC1GGTTCATCGCAGAAAA TTGCTCGATCGCAAGGCAC #     |             |       | #IS407A TAAAAAAA   |       | #IS407A  | N.D.            |
| 6*Chr2_79_ISBma1_A   | N | Bm_NCTC_1024 | 6 1436997-1448301  | Chr2 | ISBma1 | GTTTGI GGTTTCATCGCAGAAAA TTGCTCGATCGCAAGGCAC ACC |             |       | CTTTTTTC, CTTTTTTC |       | CTTTTTTC | Y               |
| 6*Chr2_69_ISBma1_A   | N | Bm_NCTC_1024 | 6 1600893-1602136  | Chr2 | ISBma1 | CAGGC1GGTTCATCGCAGAAAA TTGCTCGATCGCAAGGCAC #     |             |       | #IS407A TAAAAAAA   |       | #IS407A  | N.D.            |
| 8*Chr2_69-1_ISBma1_A | N | Bm_200272128 | 8 1609838-1609906  | Chr2 | ISBma1 | #IS4071 ~~~~~ ACC                                |             |       | TAAAAAA, #IS407A   |       | TAAAAAA, | N.D.            |
| 4*Chr2_69-1_ISBma1_A | N | Bm_gb8_horse | 4 170220-170747    | Chr2 | ISBma1 | #IS4071 ~~~~~ ACC                                |             |       | TAAAAAA, #IS407A   |       | TAAAAAA, | N.D.            |
| 1*Chr2_69-1_ISBma1_A | N | Bm_ATCC_2334 | 1 170527-170594    | Chr2 | ISBma1 | #IS4071 ~~~~~ ACC                                |             |       | TAAAAAA, #IS407A   |       | TAAAAAA, | N.D.            |
| 4*Chr2_69_ISBma1_A   | N | Bm_gb8_horse | 4 171521-172764    | Chr2 | ISBma1 | CAGGC1GGTTCATCGCAGAAAA TTGCTCGATCGCAAGGCAC #     |             |       | #IS407A TAAAAAAA   |       | #IS407A  | N.D.            |
| 7*Chr2_69-1_ISBma1_A | N | Bm_NCTC_1024 | 7 171689-171756    | Chr2 | ISBma1 | #IS4071 ~~~~~ ACC                                |             |       | TAAAAAA, #IS407A   |       | TAAAAAA, | N.D.            |
| 1*Chr2_69_ISBma1_A   | N | Bm_ATCC_2334 | 1 171828-173071    | Chr2 | ISBma1 | CAGGC1GGTTCATCGCAGAAAA TTGCTCGATCGCAAGGCAC #     |             |       | #IS407A TAAAAAAA   |       | #IS407A  | N.D.            |
| 7*Chr2_69_ISBma1_A   | N | Bm_NCTC_1024 | 7 172990-174233    | Chr2 | ISBma1 | CAGGC1GGTTCATCGCAGAAAA TTGCTCGATCGCAAGGCAC #     |             |       | #IS407A TAAAAAAA   |       | #IS407A  | N.D.            |
| 2*Chr2_69-1_ISBma1_A | N | Bm_fmh       | 2 180027-180094    | Chr2 | ISBma1 | #IS4071 ~~~~~ ACC                                |             |       | TAAAAAA, #IS407A   |       | TAAAAAA, | N.D.            |
| 2*Chr2_69_ISBma1_A   | N | Bm_fmh       | 2 181328-182571    | Chr2 | ISBma1 | CAGGC1GGTTCATCGCAGAAAA TTGCTCGATCGCAAGGCAC #     |             |       | #IS407A TAAAAAAA   |       | #IS407A  | N.D.            |
| 8*Chr2_4_ISBma1_B    | N | Bm_200272128 | 8 2007904-2009208  | Chr2 | ISBma1 | TCCGT1GGTTCATCGCAGAAAA TTGCTCGATCGCAAGGCAC ACC   |             |       | TTTTTAAI, TTTTTTAA |       | TTTTTAA  | Y               |
| 3*Chr2_69-1_ISBma1_A | N | Bm_JHU       | 3 207599-207666    | Chr2 | ISBma1 | #IS4071 ~~~~~ ACC                                |             |       | TAAAAAA, #IS407A   |       | TAAAAAA, | N.D.            |
| 3*Chr2_69_ISBma1_A   | N | Bm_JHU       | 3 208900-210143    | Chr2 | ISBma1 | CAGGC1GGTTCATCGCAGAAAA TTGCTCGATCGCAAGGCAC #     |             |       | #IS407A TAAAAAAA   |       | #IS407A  | N.D.            |
| 9*Chr2_43_ISBma1_A   | N | Bm_SAVP1     | 9 209882-211186    | Chr2 | ISBma1 | GCGCT1GGTTCATCGCAGAAAA TTGCTCGATCGCAAGGCAC ACC   |             |       | CAAGGAA, CAAGGAAA  |       | CAAGGAA, | Y               |
| 10*Chr2_79_ISBma1_A  | N | Bm_PRL20     | 10 2104725-2106029 | Chr2 | ISBma1 | GTTTGI GGTTTCATCGCAGAAAA TTGCTCGATCGCAAGGCAC ACC |             |       | CTTTTTTC, CTTTTTTC |       | CTTTTTTC | Y               |
| 7*Chr2_4_ISBma1_B    | N | Bm_NCTC_1024 | 7 2142029-2143333  | Chr2 | ISBma1 | TCCGT1GGTTCATCGCAGAAAA TTGCTCGATCGCAAGGCAC ACC   |             |       | TTTTTAAI, TTTTTTAA |       | TTTTTAA  | Y               |
| 5*Chr2_79_ISBma1_A   | N | Bm_ATCC_1034 | 5 2227856-2229160  | Chr2 | ISBma1 | GTTTGI GGTTTCATCGCAGAAAA TTGCTCGATCGCAAGGCAC ACC |             |       | CTTTTTTC, CTTTTTTC |       | CTTTTTTC | Y               |
| 4*Chr2_79_ISBma1_A   | N | Bm_gb8_horse | 4 2257635-2258939  | Chr2 | ISBma1 | GTTTGI GGTTTCATCGCAGAAAA TTGCTCGATCGCAAGGCAC ACC |             |       | CTTTTTTC, CTTTTTTC |       | CTTTTTTC | Y               |

|                    |   |              |                   |      |        |                                               |                  |          |   |
|--------------------|---|--------------|-------------------|------|--------|-----------------------------------------------|------------------|----------|---|
| 1*Chr2_79_ISBma1_A | N | Bm_ATCC_2334 | 1 2265680-2266984 | Chr2 | ISBma1 | GTTTGTGGTTCATCGCAGAAAA TTGCTCGATCGCAAGGCACACC | CTTTTTTCCTTTTTTC | CTTTTTTC | Y |
| 3*Chr2_79_ISBma1_A | N | Bm_JHU       | 3 2280857-2282161 | Chr2 | ISBma1 | GTTTGTGGTTCATCGCAGAAAA TTGCTCGATCGCAAGGCACACC | CTTTTTTCCTTTTTTC | CTTTTTTC | Y |
| 7*Chr2_79_ISBma1_A | N | Bm_NCTC_1024 | 7 2294384-2295688 | Chr2 | ISBma1 | GTTTGTGGTTCATCGCAGAAAA TTGCTCGATCGCAAGGCACACC | CTTTTTTCCTTTTTTC | CTTTTTTC | Y |
| 2*Chr2_79_ISBma1_A | N | Bm_fmh       | 2 2306093-2307397 | Chr2 | ISBma1 | GTTTGTGGTTCATCGCAGAAAA TTGCTCGATCGCAAGGCACACC | CTTTTTTCCTTTTTTC | CTTTTTTC | Y |
| 6*Chr2_43_ISBma1_A | N | Bm_NCTC_1024 | 6 5003674-5016668 | Chr2 | ISBma1 | GCGCTGGTTCATCGCAGAAAA TTGCTCGATCGCAAGGCACACC  | CAAGGAA,CAAGGAAA | CAAGGAA, | Y |
| 8*Chr2_43_ISBma1_A | N | Bm_200272128 | 8 861441-862745   | Chr2 | ISBma1 | GCGCTGGTTCATCGCAGAAAA TTGCTCGATCGCAAGGCACACC  | CAAGGAA,CAAGGAAA | CAAGGAA, | Y |
| 5*Chr2_43_ISBma1_A | N | Bm_ATCC_1034 | 5 991262-992566   | Chr2 | ISBma1 | GCGCTGGTTCATCGCAGAAAA TTGCTCGATCGCAAGGCACACC  | CAAGGAA,CAAGGAAA | CAAGGAA, | Y |

**IS Bma 2**

|                                      |     |              | 5'-ext             | 5'-IR | ORF    | 3'-IR                                                                                            | 3'-ext  | 5'-DR                   | 3'-DR | rget duplicates |  |
|--------------------------------------|-----|--------------|--------------------|-------|--------|--------------------------------------------------------------------------------------------------|---------|-------------------------|-------|-----------------|--|
|                                      |     |              | CAGATTGCTGACAAACC  |       |        | GGGTTGCTCAGCAGTCTG                                                                               |         |                         |       |                 |  |
| 8*Chr2_12_ISBma2_A                   | N   | Bm_200272128 | 8 101363-102937    | Chr2  | ISBma2 | GCCGC CAGATTGCTGACAAAC ATGCTGAAGACGCCCATG(TCCAGAAAGACAAAACCC GCGCTCC/GCGCTCCATTGCGAGC/GCGCTCC/   |         |                         |       | Y               |  |
| 9*Chr2_80a_ISBma2_A                  | N   | Bm_SAVP1     | 9 1108780-1110352  | Chr2  | ISBma2 | :GCCCT CAGATTGCTGACAAAC ATGCTGAAGACGCCCATG(TCCAGAAAGACAAAACCC AGGGCCG CGAAAAAAGGGCCGCAAGGGCCG    |         |                         |       | N               |  |
| 10*Chr2_47_ISBma2_A                  | N   | Bm_PRL20     | 10 1133963-1135355 | Chr2  | ISBma2 | CGCGG CAGATTGCTGACAAAC ATGCTGAAGACGCCCATG(TCCAGAAAGACAAAACCC AGCGCAC/GCGGATGCGAGCGCACAGCGCAC/    |         |                         |       | N               |  |
| 6*Chr2_5a_ISBma26*Chr2_14b_ISBma2_A  | R   | Bm_NCTC_1024 | 6 1142945-1144517  | Chr2  | ISBma2 | TAAAACAGATTGCTGACAAAC ATGCTGAAGACGCCCATG(TCCAGAAAGACAAAACCC GGCCTTC/AAACGCCCCCGCAGAA GGCCTTC/    |         |                         |       | N               |  |
| 9*Chr2_47_ISBma2_A                   | D-R | Bm_SAVP1     | 9 116165-117737    | Chr2  | ISBma2 | CGCGG CAGATTGCTGACAAAC ATGCTGAAGACGCCCATG(TCCAGAAAGACAAAACCC AGCGCAC/GCGGATGCGAGCGCACAGCGCAC/    |         |                         |       | N               |  |
| 4*Chr2_30_ISBma24*Chr2_47_ISBma2_A   | D-R | Bm_gb8_horse | 4 1166671-1168243  | Chr2  | ISBma2 | CGCGG CAGATTGCTGACAAAC ATGCTGAAGACGCCCATG(TCCAGAAAGACAAAACCC AACAGCC/GCGGATGCGAGCGCACAGAACGCC/   |         |                         |       | N               |  |
| 1*Chr2_30_ISBma21*Chr2_47_ISBma2_A   | D-R | Bm_ATCC_2334 | 1 1172191-1173763  | Chr2  | ISBma2 | CGCGG CAGATTGCTGACAAAC ATGCTGAAGACGCCCATG(TCCAGAAAGACAAAACCC AACAGCC/GCGGATGCGAGCGCACAGAACGCC/   |         |                         |       | N               |  |
| 8*Chr2_5b_ISBma28*Chr2_14a_ISBma2_A  | R   | Bm_200272128 | 8 1189961-1191534  | Chr2  | ISBma2 | 8189961-1191534                                                                                  |         |                         |       | N               |  |
| 2*Chr2_30_ISBma22*Chr2_47_ISBma2_A   | D-R | Bm_fmh       | 2 1191620-1193192  | Chr2  | ISBma2 | CGCGG CAGATTGCTGACAAAC ATGCTGAAGACGCCCATG(TCCAGAAAGACAAAACCC AACAGCC/GCGGATGCGAGCGCACAGAACGCC/   |         |                         |       | N               |  |
| 5*Chr2_12_ISBma2_A                   | N   | Bm_ATCC_1034 | 5 1209160-1210732  | Chr2  | ISBma2 | GCCGC CAGATTGCTGACAAAC ATGCTGAAGACGCCCATG(TCCAGAAAGACAAAACCC GCGCTCC/GCGCTCCATTGCGAGC/GCGCTCC/   |         |                         |       | Y               |  |
| 5*Chr2_11_ISBma2_B                   | N   | Bm_ATCC_1034 | 5 1214269-1214325  | Chr2  | ISBma2 | TCAGC CAGATTGCTGACAAAC ATGACTGCCCTTCGAT/#                                                        | #IS407A | ACAAAGCCCCGTCAT/#IS407A |       | N.D.            |  |
| 5*Chr2_71a_ISBma5*Chr2_80b_ISBma2_A  | R   | Bm_ATCC_1034 | 5 121539-123111    | Chr2  | ISBma2 | CGCGG CAGATTGCTGACAAAC ATGCTGAAGACGCCCATG(TCCAGAAAGACAAAACCC AGGGCCG AGGGCCGCTGCTAGCG AGGGCCG    |         |                         |       | N               |  |
| 5*Chr2_30_ISBma2_A                   | N   | Bm_ATCC_1034 | 5 1246578-1248150  | Chr2  | ISBma2 | ACAGG CAGATTGCTGACAAAC ATGCTGAAGACGCCCATG(TCCAGAAAGACAAAACCC AACAGCC/AAACAGCGCCGCCG AACAGCC/     |         |                         |       | N               |  |
| 7*Chr2_47_ISBma2_A                   | N   | Bm_NCTC_1024 | 7 1255366-1256940  | Chr2  | ISBma2 | CGCGG CAGATTGCTGACAAAC ATGCTGAAGACGCCCATG(TCCAGAAAGACAAAACCC AGCGCAC/GCGGATGCGAGCGCACAGCGCAC/    |         |                         |       | N               |  |
| 3*Chr2_30_ISBma23*Chr2_47_ISBma2_A   | D-R | Bm_JHU       | 3 1256072-1257644  | Chr2  | ISBma2 | CGCGG CAGATTGCTGACAAAC ATGCTGAAGACGCCCATG(TCCAGAAAGACAAAACCC AACAGCC/GCGGATGCGAGCGCACAGCGCAC/    |         |                         |       | N               |  |
| 6*Chr2_77_ISBma26*Chr2_78_ISBma2_A   | D   | Bm_NCTC_1024 | 6 1328449-1330024  | Chr2  | ISBma2 | TGACC/CAGATTGCTGACAAAC ATGCTGAAGACGCCCATG(TCCAGAAAGACAAAACCC AGGGCTT/GCGGGAAGCGCCGCG/AGGGCTT/    |         |                         |       | N               |  |
| 9*Chr2_71b_ISBma2_A                  | N   | Bm_SAVP1     | 9 1330891-1332463  | Chr2  | ISBma2 | CGCGG CAGATTGCTGACAAAC ATGCTGAAGACGCCCATG(TCCAGAAAGACAAAACCC AGGGCCG AGGGCCGCTGCTAGCG AGGGCCG    |         |                         |       | Y               |  |
| 6*Chr2_80a_ISBma2_A                  | N   | Bm_NCTC_1024 | 6 1438326-1439898  | Chr2  | ISBma2 | :GCCCT CAGATTGCTGACAAAC ATGCTGAAGACGCCCATG(TCCAGAAAGACAAAACCC AGGGCCG CGAAAAAAGGGCCCAAGGGCCG     |         |                         |       | N               |  |
| 9*Chr2_65_ISBma2_B                   | N   | Bm_SAVP1     | 9 1478060-1479632  | Chr2  | ISBma2 | CCTTA/CAGATTGCTGACAAAC ATGCTGAAGACGCCCATG(TCCAGAAAGACAAAACCC AGAGCGG AGCGGGCTGCAGCCG AGACGGG     |         |                         |       | Y               |  |
| 6*Chr2_82_ISBma2_B                   | N   | Bm_NCTC_1024 | 6 1490409-1491981  | Chr2  | ISBma2 | TGGCA/CAGATTGCTGACAAAC ATGCTGAAGACGCCCATG(TCCAGAAAGACAAAACCC CTGGGCC/GAAACGGGGCCCGCTGCTGGGCC/    |         |                         |       | N               |  |
| 9*Chr2_63_ISBma2_B                   | N   | Bm_SAVP1     | 9 1493768-1495340  | Chr2  | ISBma2 | CGCGG CAGATTGCTGACAAAC ATGCTGAAGACGCCCATG(TCCAGAAAGACAAAACCC AAGCCGG/AAAAAGCCGGCTGCA AAGCCGG     |         |                         |       | N               |  |
| 10*Chr2_5b_ISBma10*Chr2_14a_ISBma2_A | R   | Bm_PRL20     | 10 1506314-1507887 | Chr2  | ISBma2 | TGTGC/CAGATTGCTGACAAAC ATGCTGAAGACGCCCATG(TCCAGAAAGACAAAACCC AGCGCCG/AGGCCTT/CATCTGGCG/ACGCCCC   |         |                         |       | N               |  |
| 6*Chr2_12_ISBma2_A                   | N   | Bm_NCTC_1024 | 6 15095-16668      | Chr2  | ISBma2 | GCCGC CAGATTGCTGACAAAC ATGCTGAAGACGCCCATG(TCCAGAAAGACAAAACCC GCGCTCC/GCGCTCCATTGCGAGC/GCGCTCC/   |         |                         |       | Y               |  |
| 8*Chr2_65_ISBma2_B                   | N   | Bm_200272128 | 8 1592660-1594232  | Chr2  | ISBma2 | CGCGG CAGATTGCTGACAAAC ATGCTGAAGACGCCCATG(TCCAGAAAGACAAAACCC GACGGGC GACGGGCTGACGCCG GACGGGC     |         |                         |       | Y               |  |
| 5*Chr2_7_ISBma2_5*Chr2_14a_ISBma2_A  | D-R | Bm_ATCC_1034 | 5 1600353-1601926  | Chr2  | ISBma2 | TGTGC/CAGATTGCTGACAAAC ATGCTGAAGACGCCCATG(TCCAGAAAGACAAAACCC GGCCGAC/AGGCCTT/CATCTGGCG/GCCCGAC   |         |                         |       | N               |  |
| 8*Chr2_71b_ISBma2_A                  | N   | Bm_200272128 | 8 1612147-1613720  | Chr2  | ISBma2 | CGCGG CAGATTGCTGACAAAC ATGCTGAAGACGCCCATG(TCCAGAAAGACAAAACCC AGGGCCG AGGGCCGCTGCTAGCG AGGGCCG    |         |                         |       | Y               |  |
| 4*Chr2_5b_ISBma24*Chr2_14a_ISBma2_A  | R   | Bm_gb8_horse | 4 1631568-1633144  | Chr2  | ISBma2 | TGTGC/CAGATTGCTGACAAAC ATGCTGAAGACGCCCATG(TCCAGAAAGACAAAACCC AGCGCCG/AGGCCTT/CATCTGGCG/ACGCCCC   |         |                         |       | N               |  |
| 3*Chr2_5b_ISBma23*Chr2_14a_ISBma2_A  | R   | Bm_JHU       | 3 1632858-1634434  | Chr2  | ISBma2 | TGTGC/CAGATTGCTGACAAAC ATGCTGAAGACGCCCATG(TCCAGAAAGACAAAACCC AGCGCCG/AGGCCTT/CATCTGGCG/ACGCCCC   |         |                         |       | N               |  |
| 1*Chr2_5b_ISBma21*Chr2_14a_ISBma2_A  | R   | Bm_ATCC_2334 | 1 1638049-1639625  | Chr2  | ISBma2 | TGTGC/CAGATTGCTGACAAAC ATGCTGAAGACGCCCATG(TCCAGAAAGACAAAACCC AGCGCCG/AGGCCTT/CATCTGGCG/ACGCCCC   |         |                         |       | N               |  |
| 7*Chr2_36_ISBma2_B                   | N   | Bm_NCTC_1024 | 7 1655136-1656709  | Chr2  | ISBma2 | ACGCC CAGATTGCTGACAAAC ATGCTGAAGACGCCCATG(TCCAGAAAGACAAAACCC AAGCCG/CAAGCGCTCGGCAAC AAGCGCC      |         |                         |       | N               |  |
| 4*Chr2_71b_ISBma2_A                  | N   | Bm_gb8_horse | 4 166405-167977    | Chr2  | ISBma2 | CGCGG CAGATTGCTGACAAAC ATGCTGAAGACGCCCATG(TCCAGAAAGACAAAACCC AGGGCCG AGGGCCGCTGCTAGCG AGGGCCG    |         |                         |       | Y               |  |
| 1*Chr2_71b_ISBma2_A                  | N   | Bm_ATCC_2334 | 1 166712-168284    | Chr2  | ISBma2 | CGCGG CAGATTGCTGACAAAC ATGCTGAAGACGCCCATG(TCCAGAAAGACAAAACCC AGGGCCG AGGGCCGCTGCTAGCG AGGGCCG    |         |                         |       | Y               |  |
| 2*Chr2_5b_ISBma22*Chr2_14a_ISBma2_A  | R   | Bm_fmh       | 2 1668531-1670107  | Chr2  | ISBma2 | TGTGC/CAGATTGCTGACAAAC ATGCTGAAGACGCCCATG(TCCAGAAAGACAAAACCC AGCGCCG/AGGCCTT/CATCTGGCG/ACGCCCC   |         |                         |       | N               |  |
| 7*Chr2_71b_ISBma2_A                  | N   | Bm_NCTC_1024 | 7 167874-169446    | Chr2  | ISBma2 | CGCGG CAGATTGCTGACAAAC ATGCTGAAGACGCCCATG(TCCAGAAAGACAAAACCC AGGGCCG AGGGCCGCTGCTAGCG AGGGCCG    |         |                         |       | Y               |  |
| 9*Chr2_12_ISBma2_A                   | D-R | Bm_SAVP1     | 9 1707496-1709043  | Chr2  | ISBma2 | CGCGG CAGATTGCTGACAAAC ATGCTGAAGACGCCCATG(TCCAGAAAGACAAAACCC AAGCCCT/CAGGCCTT/CATCTGGAGC/AGGCCCC |         |                         |       | N               |  |
| 6*Chr2_65_ISBma2_B                   | N   | Bm_NCTC_1024 | 6 1744134-1745709  | Chr2  | ISBma2 | CGCGG CAGATTGCTGACAAAC ATGCTGAAGACGCCCATG(TCCAGAAAGACAAAACCC GACGGGC GACGGGCTGACGCCG GACGGGC     |         |                         |       | Y               |  |
| 2*Chr2_71b_ISBma2_A                  | N   | Bm_fmh       | 2 176212-177784    | Chr2  | ISBma2 | CGCGG CAGATTGCTGACAAAC ATGCTGAAGACGCCCATG(TCCAGAAAGACAAAACCC AGGGCCG AGGGCCGCTGCTAGCG AGGGCCG    |         |                         |       | Y               |  |
| 8*Chr2_82_ISBma2_B                   | N   | Bm_200272128 | 8 1784937-1785906  | Chr2  | ISBma2 | #contig ~~~~~ TCCAGAAAGACAAAACCC CTGGGCC(#contig_break                                           |         |                         |       | N.D.            |  |
| 10*Chr2_5a_ISBma10*Chr2_14b_ISBma2_A | R   | Bm_PRL20     | 10 1809463-1811035 | Chr2  | ISBma2 | TAAAACAGATTGCTGACAAAC ATGCTGAAGACGCCCATG(TCCAGAAAGACAAAACCC GGCCTTC/AAACGCCCCCGCAGAA GGCCTTC/    |         |                         |       | N               |  |
| 8*Chr2_5a_ISBma28*Chr2_14b_ISBma2_A  | R   | Bm_200272128 | 8 1866602-1868174  | Chr2  | ISBma2 | TAAAACAGATTGCTGACAAAC ATGCTGAAGACGCCCATG(TCCAGAAAGACAAAACCC GGCCTTC/AAACGCCCCCGCAGAA GGCCTTC/    |         |                         |       | N               |  |
| 5*Chr2_5a_ISBma25*Chr2_14b_ISBma2_A  | D-R | Bm_ATCC_1034 | 5 1933847-1935419  | Chr2  | ISBma2 | TAAAACAGATTGCTGACAAAC ATGCTGAAGACGCCCATG(TCCAGAAAGACAAAACCC GGCCTTC/AAACGCCCCCGCAGAA GGCCTTC/    |         |                         |       | N               |  |
| 4*Chr2_5a_ISBma24*Chr2_14b_ISBma2_A  | R   | Bm_gb8_horse | 4 1964034-1965606  | Chr2  | ISBma2 | TAAAACAGATTGCTGACAAAC ATGCTGAAGACGCCCATG(TCCAGAAAGACAAAACCC GGCCTTC/AAACGCCCCCGCAGAA GGCCTTC/    |         |                         |       | N               |  |
| 1*Chr2_5a_ISBma21*Chr2_14b_ISBma2_A  | R   | Bm_ATCC_2334 | 1 1971717-1973289  | Chr2  | ISBma2 | TAAAACAGATTGCTGACAAAC ATGCTGAAGACGCCCATG(TCCAGAAAGACAAAACCC GGCCTTC/AAACGCCCCCGCAGAA GGCCTTC/    |         |                         |       | N               |  |
| 3*Chr2_5a_ISBma23*Chr2_14b_ISBma2_A  | R   | Bm_JHU       | 3 1979924-1981449  | Chr2  | ISBma2 | TAAAACAGATTGCTGACAAAC ATGCTGAAGACGCCCATG(TCCAGAAAGACAAAACCC GGCCTTC/AAACGCCCCCGCAGAA GGCCTTC/    |         |                         |       | N               |  |
| 10*Chr2_77_ISBma10*Chr2_78_ISBma2_A  | D   | Bm_PRL20     | 10 1995877-1997449 | Chr2  | ISBma2 | TGACC/CAGATTGCTGACAAAC ATGCTGAAGACGCCCATG(TCCAGAAAGACAAAACCC AGGGCTT/GCGGGAAGCGCCGCG/AGGGCTT/    |         |                         |       | N               |  |
| 7*Chr2_5a_ISBma27*Chr2_14b_ISBma2_A  | R   | Bm_NCTC_1024 | 7 2000703-2002275  | Chr2  | ISBma2 | TAAAACAGATTGCTGACAAAC ATGCTGAAGACGCCCATG(TCCAGAAAGACAAAACCC GGCCTTC/AAACGCCCCCGCAGAA GGCCTTC/    |         |                         |       | N               |  |

|                                      |     |              |    |                 |      |        |                        |                                            |                                             |                   |                  |             |          |   |
|--------------------------------------|-----|--------------|----|-----------------|------|--------|------------------------|--------------------------------------------|---------------------------------------------|-------------------|------------------|-------------|----------|---|
| 2*Chr2_5a_ISBma22*Chr2_14b_ISBma2_A  | R   | Bm_fmh       | 2  | 2007940-2009512 | Chr2 | ISBma2 | TAAAA(CAGATTGCTGACAAAC | ATGCTGAAGACGCCCATG(TCCAGAAAGACAAAACCGCCTTC | AAACGCCCGCCACGAA                            | GGCCTTC           | N                |             |          |   |
| 3*Chr2_71b_ISBma2_A                  | N   | Bm_JHU       | 3  | 203784-205356   | Chr2 | ISBma2 | CGCGC                  | CAGATTGCTGACAAAC                           | ATGCTGAAGACGCCCATG(TCCAGAAAGACAAAACCGAGGCGC | AGGGCCGCTCGTAGC   | AGGGCCG          | Y           |          |   |
| 8*Chr2_77_ISBma28*Chr2_80a_ISBma2_A  | D-R | Bm_200272128 | 8  | 2051909-2053481 | Chr2 | ISBma2 | TGCCG                  | CAGATTGCTGACAAAC                           | ATGCTGAAGACGCCCATG(TCCAGAAAGACAAAACCGAGGCGC | AAAAAGCGCGCTTCG   | AGGGCCG          | N           |          |   |
| 10*Chr2_80a_ISBma2_A                 | N   | Bm_PRL20     | 10 | 2106054-2107626 | Chr2 | ISBma2 | :GCCCT                 | CAGATTGCTGACAAAC                           | ATGCTGAAGACGCCCATG(TCCAGAAAGACAAAACCGAGGCGC | CGAAAAAGGGCCCA    | AGGGCCG          | N           |          |   |
| 5*Chr2_77_ISBma25*Chr2_78_ISBma2_A   | D   | Bm_ATCC_103  | 5  | 2119130-2120702 | Chr2 | ISBma2 | TGACCI                 | CAGATTGCTGACAAAC                           | ATGCTGAAGACGCCCATG(TCCAGAAAGACAAAACCGAGGCGT | (CGGGGAAGCGCCGCG  | AGGGCTTC         | N           |          |   |
| 6*Chr2_5b_ISBma26*Chr2_14a_ISBma2_A  | R   | Bm_NCTC_102  | 6  | 2146943-2148516 | Chr2 | ISBma2 | TGTGC                  | (CAGATTGCTGACAAAC                          | ATGCTGAAGACGCCCATG(TCCAGAAAGACAAAACCGAGGCGT | (CATCTGGCG        | ACGCCCC          | N           |          |   |
| 4*Chr2_77_ISBma24*Chr2_78_ISBma2_A   | D   | Bm_gb8_horse | 4  | 2149249-2150821 | Chr2 | ISBma2 | TGACCI                 | (CAGATTGCTGACAAAC                          | ATGCTGAAGACGCCCATG(TCCAGAAAGACAAAACCGAGGCGT | (CGGGGAAGCGCCGCG  | AGGGCTTC         | N           |          |   |
| 1*Chr2_77_ISBma21*Chr2_78_ISBma2_A   | D   | Bm_ATCC_233  | 1  | 2157201-2158773 | Chr2 | ISBma2 | TGACCI                 | (CAGATTGCTGACAAAC                          | ATGCTGAAGACGCCCATG(TCCAGAAAGACAAAACCGAGGCGT | (CGGGGAAGCGCCGCG  | AGGGCTTC         | N           |          |   |
| 3*Chr2_77_ISBma23*Chr2_78_ISBma2_A   | D   | Bm_JHU       | 3  | 2168372-2169944 | Chr2 | ISBma2 | TGACCI                 | (CAGATTGCTGACAAAC                          | ATGCTGAAGACGCCCATG(TCCAGAAAGACAAAACCGAGGCGT | (CGGGGAAGCGCCGCG  | AGGGCTTC         | N           |          |   |
| 7*Chr2_77_ISBma27*Chr2_78_ISBma2_A   | D   | Bm_NCTC_102  | 7  | 2186019-2187594 | Chr2 | ISBma2 | TGACCI                 | (CAGATTGCTGACAAAC                          | ATGCTGAAGACGCCCATG(TCCAGAAAGACAAAACCGAGGCGT | (CGGGGAAGCGCCGCG  | AGGGCTTC         | N           |          |   |
| 2*Chr2_77_ISBma22*Chr2_78_ISBma2_A   | D   | Bm_fmh       | 2  | 2194588-2196160 | Chr2 | ISBma2 | TGACCI                 | (CAGATTGCTGACAAAC                          | ATGCTGAAGACGCCCATG(TCCAGAAAGACAAAACCGAGGCGT | (CGGGGAAGCGCCGCG  | AGGGCTTC         | N           |          |   |
| 5*Chr2_71b_ISBma25*Chr2_80a_ISBma2_A | R   | Bm_ATCC_103  | 5  | 2229185-2230757 | Chr2 | ISBma2 | TTTTCT                 | CAGATTGCTGACAAAC                           | ATGCTGAAGACGCCCATG(TCCAGAAAGACAAAACCGAGGCGC | AGGGGCCAAAGCGCC   | AGGGCCG          | N           |          |   |
| 4*Chr2_80a_ISBma2_A                  | N   | Bm_gb8_horse | 4  | 2258964-2259023 | Chr2 | ISBma2 | :GCCCT                 | CAGATTGCTGACAAAC                           | ~TGACCTGCCCTTCGAT.#                         | #IS407A           | AGGGGCCAAAGCGCC  | #IS407A     | N.D.     |   |
| 4*Chr2_80a-1_ISBma2_A                | N   | Bm_gb8_horse | 4  | 2260253-2261776 | Chr2 | ISBma2 | #IS407/                | ~~~~~                                      | ATGCTGAAGACGCCCATG(TCCAGAAAGACAAAACCGAGGCGC | #IS407A           | AGGGCCG          | #IS407A     | N.D.     |   |
| 1*Chr2_80a_ISBma2_A                  | N   | Bm_ATCC_233  | 1  | 2267009-2267068 | Chr2 | ISBma2 | :GCCCT                 | CAGATTGCTGACAAAC                           | ~TGACCTGCCCTTCGAT.#                         | #IS407A           | AGGGGCCAAAGCGCC  | #IS407A     | N.D.     |   |
| 1*Chr2_80a-1_ISBma2_A                | N   | Bm_ATCC_233  | 1  | 2268298-2269821 | Chr2 | ISBma2 | #IS407/                | ~~~~~                                      | ATGCTGAAGACGCCCATG(TCCAGAAAGACAAAACCGAGGCGC | #IS407A           | AGGGCCG          | #IS407A     | N.D.     |   |
| 3*Chr2_80a_ISBma2_A                  | N   | Bm_JHU       | 3  | 2282186-2282245 | Chr2 | ISBma2 | :GCCCT                 | CAGATTGCTGACAAAC                           | ~TGACCTGCCCTTCGAT.#                         | #IS407A           | AGGGGCCAAAGCGCC  | #IS407A     | N.D.     |   |
| 3*Chr2_80a-1_ISBma2_A                | N   | Bm_JHU       | 3  | 2283475-2284998 | Chr2 | ISBma2 | #IS407/                | ~~~~~                                      | ATGCTGAAGACGCCCATG(TCCAGAAAGACAAAACCGAGGCGC | #IS407A           | AGGGCCG          | #IS407A     | N.D.     |   |
| 7*Chr2_80a_ISBma2_A                  | N   | Bm_NCTC_102  | 7  | 2295713-2297285 | Chr2 | ISBma2 | :GCCCT                 | CAGATTGCTGACAAAC                           | ATGCTGAAGACGCCCATG(TCCAGAAAGACAAAACCGAGGCGC | CGAAAAAGGGCCCA    | AGGGCCG          | N           |          |   |
| 2*Chr2_80a_ISBma2_A                  | N   | Bm_fmh       | 2  | 2307422-2307481 | Chr2 | ISBma2 | :GCCCT                 | CAGATTGCTGACAAAC                           | ~TGACCTGCCCTTCGAT.#                         | #IS407A           | AGGGGCCAAAGCGCC  | #IS407A     | N.D.     |   |
| 2*Chr2_80a-1_ISBma2_A                | N   | Bm_fmh       | 2  | 2308711-2310234 | Chr2 | ISBma2 | #IS407/                | ~~~~~                                      | ATGCTGAAGACGCCCATG(TCCAGAAAGACAAAACCGAGGCGC | #IS407A           | AGGGCCG          | #IS407A     | N.D.     |   |
| 4*Chr2_82_ISBma2_B                   | N   | Bm_gb8_horse | 4  | 2310538-2312110 | Chr2 | ISBma2 | CGCAC                  | CAGATTGCTGACAAAC                           | ATGCTGAAGACGCCCATG(TCCAGAAAGACAAAACCGA      | AAACGGG           | AAACGGGGCCCGCTG  | AAACGGG     | Y        |   |
| 1*Chr2_82_ISBma2_B                   | N   | Bm_ATCC_233  | 1  | 2320471-2322043 | Chr2 | ISBma2 | CGCAC                  | CAGATTGCTGACAAAC                           | ATGCTGAAGACGCCCATG(TCCAGAAAGACAAAACCGA      | AAACGGG           | AAACGGGGCCCGCTG  | AAACGGG     | Y        |   |
| 7*Chr2_82_ISBma2_B                   | N   | Bm_NCTC_102  | 7  | 2347787-2349359 | Chr2 | ISBma2 | TCCGA                  | (CAGATTGCTGACAAAC                          | ATGCTGAAGACGCCCATG(TCCAGAAAGACAAAACCGAGGCGC | (CTGGGCC          | CTGGGCCGTT       | CTGGGCC     | Y        |   |
| 8*Chr2_36_ISBma2_B                   | N   | Bm_200272128 | 8  | 260811-262383   | Chr2 | ISBma2 | ACGGC                  | CAGATTGCTGACAAAC                           | ATGCTGAAGACGCCCATG(TCCAGAAAGACAAAACCGAGGCGC | CAAGCGCTCGGCAAC   | AAGGGCCG         | N           |          |   |
| 10*Chr2_65_ISBma2_B                  | N   | Bm_PRL20     | 10 | 274212-275784   | Chr2 | ISBma2 | CTCTA                  | (CAGATTGCTGACAAAC                          | ATGCTGAAGACGCCCATG(TCCAGAAAGACAAAACCGAGGCGC | AGACGGG           | AGACGGGCTGCAGCC  | AGACGGG     | Y        |   |
| 5*Chr2_64_ISBma2_B                   | N   | Bm_ATCC_103  | 5  | 274296-275868   | Chr2 | ISBma2 | CCACG                  | CAGATTGCTGACAAAC                           | ATGCTGAAGACGCCCATG(TCCAGAAAGACAAAACCGAGGCGT | AGGCGTT           | AGGCGTTTCGATT    | CGA         | AGGCGGT  | Y |
| 10*Chr2_63_ISBma2_B                  | N   | Bm_PRL20     | 10 | 289920-291492   | Chr2 | ISBma2 | CGCGC                  | CAGATTGCTGACAAAC                           | ATGCTGAAGACGCCCATG(TCCAGAAAGACAAAACCGAGGCGC | AAAAAGCGCCGCTG    | CAACGGCCG        | N           |          |   |
| 6*Chr2_47_ISBma2_A                   | N   | Bm_NCTC_102  | 6  | 298358-299930   | Chr2 | ISBma2 | CGCGG                  | CAGATTGCTGACAAAC                           | ATGCTGAAGACGCCCATG(TCCAGAAAGACAAAACCGAGGCGC | AC                | GCGGATGCAGCGCACG | AGGCGCAC    | N        |   |
| 7*Chr2_65_ISBma2_B                   | N   | Bm_NCTC_102  | 7  | 316219-317791   | Chr2 | ISBma2 | CGCGC                  | CAGATTGCTGACAAAC                           | ATGCTGAAGACGCCCATG(TCCAGAAAGACAAAACCGAGGCGC | GACGGG            | GACGGGCTGCAGCCG  | CAGCGGGC    | Y        |   |
| 4*Chr2_47_ISBma2_B                   | N   | Bm_gb8_horse | 4  | 318688-320260   | Chr2 | ISBma2 | CCACG                  | CAGATTGCTGACAAAC                           | ATGCTGAAGACGCCCATG(TCCAGAAAGACAAAACCGAGGCGT | AGGCGTT           | AGGCGTTTCGATT    | CGA         | AGGCGGT  | Y |
| 1*Chr2_64_ISBma2_B                   | N   | Bm_ATCC_233  | 1  | 319482-321054   | Chr2 | ISBma2 | CCACG                  | CAGATTGCTGACAAAC                           | ATGCTGAAGACGCCCATG(TCCAGAAAGACAAAACCGAGGCGT | AGGCGTT           | AGGCGTTTCGATT    | CGA         | AGGCGGT  | Y |
| 2*Chr2_64_ISBma2_B                   | N   | Bm_fmh       | 2  | 328979-330551   | Chr2 | ISBma2 | CCACG                  | CAGATTGCTGACAAAC                           | ATGCTGAAGACGCCCATG(TCCAGAAAGACAAAACCGAGGCGT | AGGCGTT           | AGGCGTTTCGATT    | CGA         | AGGCGGT  | Y |
| 3*Chr2_64_ISBma2_B                   | N   | Bm_JHU       | 3  | 357598-359170   | Chr2 | ISBma2 | CCACG                  | CAGATTGCTGACAAAC                           | ATGCTGAAGACGCCCATG(TCCAGAAAGACAAAACCGAGGCGT | AGGCGTT           | AGGCGTTTCGATT    | CGA         | AGGCGGT  | Y |
| 3*Chr2_82_ISBma2_B                   | N   | Bm_JHU       | 3  | 3773-5345       | Chr2 | ISBma2 | CGCAC                  | CAGATTGCTGACAAAC                           | ATGCTGAAGACGCCCATG(TCCAGAAAGACAAAACCGA      | AAACGGG           | AAACGGGGCCCGCTG  | AAACGGG     | Y        |   |
| 2*Chr2_82_ISBma2_B                   | N   | Bm_fmh       | 2  | 4374-5946       | Chr2 | ISBma2 | CGCAC                  | CAGATTGCTGACAAAC                           | ATGCTGAAGACGCCCATG(TCCAGAAAGACAAAACCGA      | AAACGGG           | AAACGGGGCCCGCTG  | AAACGGG     | Y        |   |
| 8*Chr2_47_ISBma2_A                   | N   | Bm_200272128 | 8  | 659779-661351   | Chr2 | ISBma2 | CGCGC                  | CAGATTGCTGACAAAC                           | ATGCTGAAGACGCCCATG(TCCAGAAAGACAAAACCGAGGCGC | AC                | GCGGATGCAGCGCACG | AGGCGCAC    | N        |   |
| 7*Chr2_5b_ISBma27*Chr2_14a_ISBma2_A  | R   | Bm_NCTC_102  | 7  | 719172-720746   | Chr2 | ISBma2 | TGTGC                  | (CAGATTGCTGACAAAC                          | ATGCTGAAGACGCCCATG(TCCAGAAAGACAAAACCGAGGCGT | (ACGGCTTCATCTGGCG | ACGCCCC          | N           |          |   |
| 6*Chr2_36_ISBma2_B                   | N   | Bm_NCTC_102  | 6  | 797475-799047   | Chr2 | ISBma2 | ACGCC                  | CAGATTGCTGACAAAC                           | ATGCTGAAGACGCCCATG(TCCAGAAAGACAAAACCGAGGCGC | CAAGGGCTCGGCAAC   | AAGGGCCG         | N           |          |   |
| 9*Chr2_5a_ISBma29*Chr2_14b_ISBma2_A  | D-R | Bm_SAVP1     | 9  | 813639-815211   | Chr2 | ISBma2 | TAAAA                  | (CAGATTGCTGACAAAC                          | ATGCTGAAGACGCCCATG(TCCAGAAAGACAAAACCGCCTTC  | AAACGCCCGCCACGAA  | GGCCTTC          | N           |          |   |
| 10*Chr2_30_ISBma2_A                  | N   | Bm_PRL20     | 10 | 834777-836349   | Chr2 | ISBma2 | ACAGC                  | CAGATTGCTGACAAAC                           | ATGCTGAAGACGCCCATG(TCCAGAAAGACAAAACCGAGGCGC | AAAAAGCGCCG       | AAAAAGCGCCG      | AAAAAGCGCCG | N        |   |
| 7*Chr2_12_ISBma2_A                   | N   | Bm_NCTC_102  | 7  | 871394-872967   | Chr2 | ISBma2 | GCCGC                  | CAGATTGCTGACAAAC                           | ATGCTGAAGACGCCCATG(TCCAGAAAGACAAAACCGAGGCGC | CGCTCC            | CGCTCCATT        | CGGAGC      | (CGCTCC  | Y |
| 10*Chr2_12_ISBma2_A                  | D-R | Bm_PRL20     | 10 | 876295-877868   | Chr2 | ISBma2 | GCCGC                  | CAGATTGCTGACAAAC                           | ATGCTGAAGACGCCCATG(TCCAGAAAGACAAAACCGAGGCGC | AAGCCCC           | CGCTCCATT        | CGGAGC      | (AAGCCCC | N |
| 4*Chr2_11_ISBma2_B                   | N   | Bm_gb8_horse | 4  | 888664-890236   | Chr2 | ISBma2 | TCAGC                  | (CAGATTGCTGACAAAC                          | ATGCTGAAGACGCCCATG(TCCAGAAAGACAAAACCGAGGCGC | (ACAAAGCCCCGTCAAT | AAGCCCC          | N           |          |   |
| 1*Chr2_11_ISBma2_B                   | N   | Bm_ATCC_233  | 1  | 893528-895100   | Chr2 | ISBma2 | TCAGC                  | (CAGATTGCTGACAAAC                          | ATGCTGAAGACGCCCATG(TCCAGAAAGACAAAACCGAGGCGC | (ACAAAGCCCCGTCAAT | AAGCCCC          | N           |          |   |
| 4*Chr2_12_ISBma2_A                   | N   | Bm_gb8_horse | 4  | 893773-895346   | Chr2 | ISBma2 | GCCGC                  | CAGATTGCTGACAAAC                           | ATGCTGAAGACGCCCATG(TCCAGAAAGACAAAACCGAGGCGC | CGCTCC            | CGCTCCATT        | CGGAGC      | (CGCTCC  | Y |
| 1*Chr2_12_ISBma2_A                   | N   | Bm_ATCC_233  | 1  | 898637-900210   | Chr2 | ISBma2 | GCCGC                  | CAGATTGCTGACAAAC                           | ATGCTGAAGACGCCCATG(TCCAGAAAGACAAAACCGAGGCGC | CGCTCC            | CGCTCCATT        | CGGAGC      | (CGCTCC  | Y |
| 5*Chr2_47_ISBma2_B                   | N   | Bm_ATCC_103  | 5  | 904424-905996   | Chr2 | ISBma2 | CGCGG                  | CAGATTGCTGACAAAC                           | ATGCTGAAGACGCCCATG(TCCAGAAAGACAAAACCGAGGCGC | AC                | GCGGATGCAGCGCACG | AGGCGCAC    | N        |   |
| 2*Chr2_11_ISBma2_B                   | N   | Bm_fmh       | 2  | 907252-909260   | Chr2 | ISBma2 | TCAGC                  | (CAGATTGCTGACAAAC                          | ATGCTGAAGACGCCCATG(TCCAGAAAGACAAAACCGAGGCGC | (ACAAAGCCCCGTCAAT | AAGCCCC          | N           |          |   |
| 2*Chr2_12_ISBma2_A                   | N   | Bm_fmh       | 2  | 912797-914370   | Chr2 | ISBma2 | GCCGC                  | CAGATTGCTGACAAAC                           | ATGCTGAAGACGCCCATG(TCCAGAAAGACAAAACCGAGGCGC | CGCTCC            | CGCTCCATT        | CGGAGC      | (CGCTCC  | Y |
| 3*Chr2_11_ISBma2_B                   | N   | Bm_JHU       | 3  | 968882-970454   | Chr2 | ISBma2 | TCAGC                  | (CAGATTGCTGACAAAC                          | ATGCTGAAGACGCCCATG(TCCAGAAAGACAAAACCGAGGCGC | (ACAAAGCCCCGTCAAT | AAGCCCC          | N           |          |   |
| 3*Chr2_12_ISBma2_A                   | N   | Bm_JHU       | 3  | 973991-975564   | Chr2 | ISBma2 | GCCGC                  | CAGATTGCTGACAAAC                           | ATGCTGAAGACGCCCATG(TCCAGAAAGACAAAACCGAGGCGC | CGCTCC            | CGCTCCATT        | CGGAGC      | (CGCTCC  | Y |
| 9*Chr2_77_ISBma29*Chr2_78_ISBma2_A   | D   | Bm_SAVP1     | 9  | 998682-1000254  | Chr2 | ISBma2 | TGACCI                 | (CAGATTGCTGACAAAC                          | ATGCTGAAGACGCCCATG(TCCAGAAAGACAAAACCGAGGCGT | (CGGGGAAGCGCCGCG  | AGGGCTTC         | N           |          |   |
