# Supplementary material for: The Early Stage of Bacterial Genome-Reductive Evolution in the Host
Source: PubMed Central journal article supplement (PMC2877748; doi:10.1371/journal.ppat.1000922), 2010-05-27
Supplement: ppat.1000922.s006.pdf [file ppat.1000922.s006.pdf]

Table S4. Disrupted genes that resulted from SSR-mediated frameshift mutations in *B. mallei* and *B. pseudomallei*.

|             |                                                      |
|-------------|------------------------------------------------------|
| IS407A      | disrupted by IS407A                                  |
| genomic-del | removed by large genomic deletion                    |
| o           | disrupted gene                                       |
| absent      | either deletion in the strain or insertion in K96243 |

| locus     | protein                                                     | <i>B. mallei</i> |        |        |           |             |        |             |             |        |        | <i>B. pseudomallei</i> |       |       |       |      |        |         |        |
|-----------|-------------------------------------------------------------|------------------|--------|--------|-----------|-------------|--------|-------------|-------------|--------|--------|------------------------|-------|-------|-------|------|--------|---------|--------|
|           |                                                             | ATCC23344        | FMH    | JHU    | βB8 horse | ATCC 10399  | 10229  | 10247       | 2002721280  | SAVP1  | PRL-20 | 1106a                  | 1106b | 1710a | 1710b | 406e | 668    | Pasteur | S13    |
| BPSL0006  | hypothetical protein BPSL0006                               | o                | o      | o      | o         | o           | o      | o           | o           | o      |        |                        |       |       |       |      |        |         |        |
| BPSL0035  | hypothetical protein BPSL0035                               |                  |        |        |           |             |        |             |             |        |        |                        |       |       |       |      | o      |         |        |
| BPSL0223  | putative acyl-CoA dehydrogenase                             | o                | o      | o      | o         | o           | o      | o           | o           | o      |        |                        |       |       |       |      |        |         |        |
| BPSL0258  | hypothetical protein BPSL0258                               | o                | o      | o      | o         | o           | o      | o           | o           | o      |        |                        |       |       |       |      |        |         |        |
| BPSL0269  | flagellar basal body P-ring biosynthesis p                  | o                | o      | o      | o         | o           | o      | o           | o           | o      |        |                        |       |       |       |      |        |         |        |
| BPSL0276  | flagellar L-ring protein precursor                          | o                | o      | o      | o         |             |        |             |             |        |        |                        |       |       |       |      |        |         |        |
| BPSL0308  | hypothetical protein BPSL0308                               |                  |        |        | o         |             |        |             |             |        |        |                        |       |       |       |      |        |         |        |
| BPSL0321  | hypothetical protein BPSL0321                               |                  |        |        |           |             |        | o           |             |        |        |                        |       |       |       |      |        |         |        |
| BPSL0347  | putative insertion element protein                          | genomic-del      |        |        |           |             |        |             |             |        |        | o                      | o     |       |       | o    | absent |         | o      |
| BPSL0371  | acetyl-CoA acetyltransferase                                |                  |        |        |           |             |        |             |             | o      | o      |                        |       |       |       |      |        |         |        |
| BPSL0377  | hypothetical protein BPSL0377                               | genomic-del      |        |        |           |             |        |             |             |        |        |                        |       | o     | o     |      |        |         | o      |
| BPSL0405  | hypothetical protein BPSL0405                               |                  |        |        |           |             |        |             |             |        |        |                        |       | o     |       |      |        |         |        |
| BPSL0426  | C4-dicarboxylate transport sensor protein                   | o                | o      | o      | o         | o           | o      | o           | genomic-del | o      | o      |                        |       |       |       |      |        |         |        |
| BPSL0492  | hypothetical protein BPSL0492                               |                  |        |        |           |             |        |             |             |        | o      | o                      | o     | o     | o     |      | o      | o       | o      |
| BPSL0578  | dienelactone hydrolase family protein                       | genomic-del      |        |        |           |             |        |             |             |        |        |                        |       |       |       |      |        |         | o      |
| BPSL0589  | hypothetical protein BPSL0589                               | IS407A           | IS408A | IS409A | IS410A    | IS411A      | IS412A | IS413A      | IS414A      | IS415A | IS416A |                        | o     | o     | o     |      | o      |         |        |
| BPSL0662  | hypothetical protein BPSL0662                               | o                | o      | o      | o         | o           | o      | o           | o           | o      | o      |                        |       |       |       |      |        |         |        |
| BPSL0681  | hypothetical protein BPSL0681                               | o                | o      | o      | o         | o           | o      | o           | o           | o      | o      |                        |       |       |       |      |        |         |        |
| BPSL0703  | putative two-component sensor histidine kinase              |                  |        |        |           |             |        |             |             |        |        |                        |       |       |       |      |        |         | o      |
| BPSL0726  | hypothetical protein BPSL0726                               | genomic-del      |        |        |           |             |        |             |             |        |        |                        |       | o     | o     |      | o      |         | o      |
| BPSL0735  | hypothetical protein BPSL0735                               | genomic-del      |        |        |           |             |        |             |             |        |        |                        |       |       |       |      |        |         | o      |
| BPSL0787  | hypothetical protein BPSL0787                               | o                | o      | o      | o         |             |        |             |             |        |        |                        |       |       |       |      |        |         |        |
| BPSL0828  | putative tagatose 6-phosphate kinase pr                     | o                | o      | o      | o         | o           | o      | o           | o           | o      |        |                        |       |       |       |      |        |         |        |
| BPSL0860  | putative hydrolase                                          |                  |        |        |           |             |        |             |             |        |        |                        |       |       |       |      |        |         | o      |
| BPSL0862  | putative methylated-DNA--protein-cysteine methyltransferase |                  |        |        |           |             |        |             |             |        | o      | o                      | o     | o     |       | o    | o      | o       |        |
| BPSL0878  | tetraacyldisaccharide 4'-kinase                             | o                |        |        |           |             |        |             |             |        |        |                        |       |       |       |      |        |         |        |
| BPSL0882  | putative chromate transporter protein                       |                  | o      |        |           | genomic-del |        |             |             |        |        |                        |       |       |       |      |        |         |        |
| BPSL0898a | ATP-dependent Clp protease adaptor protein ClpS             |                  |        |        |           |             |        | o           |             |        |        |                        |       |       |       |      |        |         |        |
| BPSL0917  | putative DNA repair protein                                 |                  |        |        |           |             |        |             |             |        |        |                        | o     |       |       |      |        |         | absent |
| BPSL0922  | putative ABC transporter ATP-binding protein                |                  |        |        |           |             |        | genomic-del |             | o      |        |                        |       |       |       |      |        |         | absent |
| BPSL0954  | hypothetical protein BPSL0954                               |                  |        |        |           |             |        |             |             |        |        |                        | o     | o     |       |      |        |         | absent |
| BPSL0967  | hypothetical protein BPSL0967                               |                  |        |        |           |             |        |             |             |        | o      |                        |       |       |       |      |        |         | absent |
| BPSL0970  | putative isoleucine biosynthesis transcript                 | o                | o      | o      | o         | o           | o      | o           | o           | o      |        |                        |       |       |       |      |        |         |        |
| BPSL0976  | putative outer membrane receptor protein                    |                  |        |        |           |             |        |             |             |        |        | o                      |       |       |       |      |        |         |        |
| BPSL0977  | putative transmembrane ABC transporter permease             |                  |        |        |           |             |        |             |             |        |        |                        |       |       | o     |      |        |         |        |
| BPSL1007  | putative fimbriae usher protein                             |                  |        |        |           |             |        |             |             |        |        | o                      |       |       |       |      |        |         |        |
| BPSL1014  | hypothetical protein BPSL1014                               |                  |        |        |           |             |        |             |             |        |        |                        |       |       | o     |      |        |         |        |
| BPSL1038a | hypothetical protein BPSL1038a                              |                  |        |        |           |             |        |             |             |        |        |                        |       |       |       | o    |        |         |        |
| BPSL1041  | hypothetical protein BPSL1041                               | genomic-del      |        |        |           |             |        |             |             |        |        |                        |       | o     | o     |      |        | o       |        |
| BPSL1114  | putative ATP-dependent RNA helicase 2                       |                  |        |        |           |             |        |             |             |        |        |                        |       | o     |       |      |        |         |        |
| BPSL1117  | DNA polymerase III subunit alpha                            |                  |        |        |           |             |        |             |             |        |        |                        |       | o     |       |      |        |         |        |
| BPSL1128  | putative lipoprotein                                        |                  |        |        |           |             |        |             |             |        |        |                        |       |       | o     |      |        |         |        |
| BPSL1133  | hypothetical protein BPSL1133                               |                  |        |        |           |             |        |             |             |        |        |                        |       |       |       | o    |        |         | o      |
| BPSL1174  | two-component system, sensor kinase pr                      | o                | o      | o      | o         | o           | o      | o           | o           | o      |        |                        |       |       |       |      |        |         |        |
| BPSL1179  | hypothetical protein BPSL1179                               |                  |        |        |           |             |        |             |             |        |        |                        | o     |       |       |      |        |         |        |
