# Supplementary material for: The Early Stage of Bacterial Genome-Reductive Evolution in the Host
Source: PubMed Central journal article supplement (PMC2877748; doi:10.1371/journal.ppat.1000922), 2010-05-27
Supplement: ppat.1000922.s007.pdf [file ppat.1000922.s007.pdf]

|          |                                                                          |          |          |          |          |
|----------|--------------------------------------------------------------------------|----------|----------|----------|----------|
| BPSL1919 | transcription elongation factor NusA                                     |          |          |          |          |
| BPSL1923 | putative transcriptional regulator                                       |          |          |          |          |
| BPSL1938 | putative transcriptional regulator                                       |          |          |          |          |
| BPSL1956 | putative LuxR-family regulatory protein                                  |          |          |          |          |
| BPSL1985 | putative two component system, response regulator                        |          |          |          |          |
| BPSL1990 | putative transcriptional regulatory protein                              |          |          |          |          |
| BPSL2008 | putative LysR-family transcriptional regulator                           |          |          |          |          |
| BPSL2024 | putative two component regulatory system, response regulator             |          |          |          |          |
| BPSL2032 | putative LysR-family transcriptional regulator                           |          |          |          |          |
| BPSL2065 | putative two component system, response regulator                        |          |          |          |          |
| BPSL2068 | putative two component system, response regulator                        |          |          |          |          |
| BPSL2094 | oxidative stress related two component system, transcriptional regulator |          |          |          |          |
| BPSL2121 | putative GntR-family transcriptional regulator                           |          |          |          |          |
| BPSL2187 | putative ATP-dependent RNA helicase                                      |          |          |          |          |
| BPSL2190 | putative LysR-family regulatory protein                                  |          |          |          |          |
| BPSL2290 | hypothetical protein BPSL2290                                            |          |          |          |          |
| BPSL2314 | putative response regulator protein                                      |          |          |          |          |
| BPSL2343 | putative histidine utilization repressor                                 |          |          |          |          |
| BPSL2417 | LysR family regulatory protein                                           | missense | missense | missense | missense |
| BPSL2436 | RNA polymerase sigma-70 factor                                           |          |          |          |          |
| BPSL2471 | ArsR family regulatory protein                                           |          |          |          |          |
| BPSL2546 | transcriptional activator protein                                        |          |          |          |          |
| BPSL2560 | transcription elongation factor GreB                                     |          |          |          |          |
| BPSL2562 | DNA-directed RNA polymerase omega subunit                                |          |          |          |          |
| BPSL2628 | transcription antitermination protein NusB                               |          |          |          |          |
| BPSL2662 | urease accessory protein                                                 |          |          |          |          |
| BPSL2693 | hypothetical protein BPSL2693                                            |          |          |          |          |
| BPSL2700 | hypothetical protein BPSL2700                                            |          |          |          |          |
| BPSL2733 | putative LysR-family transcriptional regulator                           |          | missense |          |          |
| BPSL2746 | IcIR-family transcriptional regulator                                    |          |          |          |          |
| BPSL2884 | hypothetical protein BPSL2884                                            |          |          |          |          |
| BPSL2895 | DNA-binding protein Fis                                                  |          |          |          |          |
| BPSL3142 | BolA-like protein                                                        |          |          |          |          |
| BPSL3187 | DNA-directed RNA polymerase alpha subunit                                |          |          |          |          |
| BPSL3221 | DNA-directed RNA polymerase beta subunit                                 |          | missense | missense |          |
| BPSL3238 | putativeAsnC-family transcriptional regulator                            |          |          |          |          |
| BPSL3279 | putative AsnC-family transcriptional regulator                           |          |          |          |          |
| BPSL3291 | flagellar biosynthesis sigma factor FlIA                                 |          |          |          |          |
| BPSL3379 | MerR family regulatory protein                                           |          |          |          |          |
| BPSL3380 | putative PadR transcriptional regulator                                  | missense |          |          |          |
| BPSL3423 | putative AsnC-family transcriptional regulator                           |          |          |          |          |
| BPSL3426 | putative two-component response regulator                                |          |          |          |          |
| BPSS0004 | DNA-binding protein                                                      |          |          |          |          |
| BPSS0008 | TetR-family regulatory protein                                           | missense |          |          |          |
| BPSS0012 | LysR-family regulatory protein                                           |          |          |          |          |
| BPSS0022 | PadR-like family regulatory protein                                      |          |          |          |          |
| BPSS0041 | LysR-family transcriptional regulator                                    |          |          |          |          |
| BPSS1325 | AsnC family leucine-responsive regulatory protein                        |          |          |          |          |
| BPSS1328 | GntR-family transcriptional regulator                                    |          |          |          |          |
| BPSS1339 | ArsR family regulatory protein                                           |          |          |          |          |
| BPSS1343 | DNA-binding protein                                                      |          |          |          |          |
| BPSS1449 | TetR family transcriptional regulator                                    |          |          |          |          |
| BPSS1461 | two-component response regulator                                         |          |          |          |          |
| BPSS1469 | LysR family transcriptional regulator                                    |          |          |          |          |
| BPSS1471 | TetR family transcriptional regulator                                    |          |          |          |          |
| BPSS1643 | LysR-family transcriptional regulator                                    |          |          |          |          |
| BPSS1721 | GntR-family transcriptional regulator                                    |          |          |          |          |







BPSL1272 hypothetical protein BPSL1272  
BPSL1275 putative AsnC-family transcriptional regulator  
BPSL1304 putative LacI-family transcriptional regulator  
BPSL1326 putative LysR-family transcriptional regulator  
BPSL1352 transcription elongation factor GreA  
BPSL1400 putative MarR-family transcriptional regulator  
BPSL1483 putative DNA-binding protein  
BPSL1487 putative MerR-family transcriptional regulator  
BPSL1505 RNA polymerase sigma factor  
BPSL1530 putative ATP-dependent DNA helicase-related protein  
BPS2350 partitioning protein ParB

---
