# Supplementary material for: The Early Stage of Bacterial Genome-Reductive Evolution in the Host
Source: PubMed Central journal article supplement (PMC2877748; doi:10.1371/journal.ppat.1000922), 2010-05-27
Supplement: ppat.1000922.s009.pdf [file ppat.1000922.s009.pdf]

Table S7. Putative regulatory genes deleted from *B. mallei* as IS-bounded genomic fragments

| Locus tag    | Common name                                               | 5'-end  | 3'-end  | COG                 |
|--------------|-----------------------------------------------------------|---------|---------|---------------------|
| Chromosome 1 |                                                           |         |         |                     |
| BPSL0069     | putative transmembrane regulator                          | 78278   | 77520   | COG5662K            |
| BPSL0070     | putative RNA polymerase sigma factor                      | 78790   | 78275   | COG1595K            |
| BPSL0327     | LysR family regulatory protein                            | 349356  | 350318  | COG0583K            |
| BPSL0330     | AsnC family regulatory protein                            | 353512  | 353024  | COG1522K            |
| BPSL0340     | AsnC family regulatory protein                            | 362642  | 362184  | COG1522K            |
| BPSL0350     | Fis family regulatory protein                             | 373423  | 374079  | COG3829KT           |
| BPSL0549A    | putative DNA-binding protein                              | 607069  | 606593  | COG1396K            |
| BPSL0562     | putative DNA-binding protein                              | 615702  | 616079  | COG1396K            |
| BPSL0571     | hypothetical protein BPSL0571                             | 626686  | 628548  | COG0515RTKL         |
| BPSL0709     | putative LysR family transcriptional regulator            | 811759  | 812583  | COG0583K            |
| BPSL0731     | LysR family transcriptional regulator                     | 844113  | 845339  | COG0583K            |
| BPSL0734     | putative two-component transcriptional response regulator | 848805  | 847843  | COG0745TK           |
| BPSL0756     | putative DNA-binding protein                              | 873708  | 873400  | COG1396K            |
| BPSL0763     | putative helicase SNF2 family protein                     | 878619  | 881801  | COG0553KL           |
| BPSL0765     | putative helicase family protein                          | 886079  | 889639  | COG1200LK, COG1205R |
| BPSL0939     | putative DeoR family regulatory protein                   | 1091418 | 1092440 | COG2378K            |
| BPSL1453     | putative LysR-family transcriptional regulator            | 1690008 | 1690919 | COG0583K            |
| BPSL1562     | putative transcriptional regulatory protein               | 1812459 | 1813862 | COG3829KT           |
| BPSL1564     | putative transcriptional regulatory protein               | 1814749 | 1814973 | COG3655K            |
| BPSL1565     | putative MerR-family transcriptional regulator            | 1817363 | 1816314 | COG0789K            |
| BPSL1642     | putative GntR-family regulatory protein                   | 1904965 | 1905735 | COG1802K            |
| BPSL1653     | putative GntR-family regulatory protein                   | 1915444 | 1916208 | COG1802K            |
| BPSL1669     | putative two component system, response regulator         | 1948084 | 1948797 | COG0745TK           |
| BPSL1680     | putative LysR-family transcriptional regulatory protein   | 1961861 | 1960971 | COG0583K            |
| BPSL1686     | RNA polymerase sigma-70 factor                            | 1966393 | 1966929 | COG1595K            |
| BPSL1695     | putative GntR-family transcriptional regulator            | 1973254 | 1972586 | COG1802K            |
| BPSL1831     | putative ribose operon repressor                          | 2184766 | 2183735 | COG1609K            |
| BPSL2111     | putative LysR-family transcriptional regulator            | 2536505 | 2537434 | COG0583K            |
| BPSL2782     | putative AraC family transcriptional regulator            | 3321881 | 3320835 | COG4977K            |

|          |                                                |         |         |                    |
|----------|------------------------------------------------|---------|---------|--------------------|
| BPSL3115 | putative transcriptional regulator             | 3719241 | 3720311 | COG1396K, COG2856E |
| BPSL3250 | putative LysR-family transcriptional regulator | 3863362 | 3862424 | COG0583K           |

Chromosome 2

|          |                                                        |         |         |           |
|----------|--------------------------------------------------------|---------|---------|-----------|
| BPSS0119 | two-component system response regulator                | 152618  | 151956  | COG2197TK |
| BPSS0124 | response regulator                                     | 159632  | 160324  | COG2197TK |
| BPSS0129 | transcriptional regulator                              | 165876  | 167096  | COG3835KT |
| BPSS0134 | LysR-family transcriptional regulator                  | 174673  | 173732  | COG0583K  |
| BPSS0143 | ROK family transcriptional regulator                   | 185761  | 184511  | COG1940KG |
| BPSS0431 | LysR-family transcriptional regulator                  | 594292  | 593393  | COG0583K  |
| BPSS0438 | LysR-family transcriptional regulator                  | 601354  | 602265  | COG0583K  |
| BPSS0449 | GntR-family regulatory protein                         | 615297  | 613963  | COG1167KE |
| BPSS0472 | MerR-family transcriptional regulator                  | 642281  | 642832  | COG1396K  |
| BPSS0596 | sigma-54 activated regulatory protein                  | 819431  | 817491  | COG3284QK |
| BPSS0606 | LysR family regulatory protein                         | 827920  | 828819  | COG0583K  |
| BPSS0664 | response regulator protein                             | 898946  | 899656  | COG0745TK |
| BPSS1371 | AraC family transcriptional regulator                  | 1876037 | 1877203 | COG4977K  |
| BPSS1816 | regulatory protein                                     | 2475821 | 2475528 | COG0640K  |
| BPSS1994 | metal-related two-component system, response regulator | 2698676 | 2699368 | COG0745TK |
| BPSS1995 | metal-related two-component system, histidine kinase   | 2699365 | 2700819 | COG0642T  |
| BPSS2017 | LysR-family transcriptional regulator                  | 2728954 | 2728076 | COG0583K  |
| BPSS2028 | TetR-family transcriptional regulator                  | 2741325 | 2740651 | COG1309K  |
| BPSS2073 | GntR family regulator protein                          | 2809190 | 2808477 | COG2186K  |
| BPSS2087 | Lacl family regulatory protein                         | 2826375 | 2825317 | COG1609K  |
| BPSS2177 | LysR-family transcriptional regulator                  | 2944785 | 2945741 | COG0583K  |
| BPSS2199 | AsnC-family regulatory protein                         | 2967135 | 2966659 | COG1522K  |
| BPSS2204 | GntR-family regulatory protein                         | 2972798 | 2972031 | COG2186K  |
| BPSS2207 | LysR-family transcriptional regulator                  | 2976263 | 2977177 | COG0583K  |
| BPSS2218 | DNA-directed RNA polymerase subunit N                  | 2992777 | 2991302 | COG1508K  |

---
