# Supplementary material for: The Early Stage of Bacterial Genome-Reductive Evolution in the Host
Source: PLoS Pathog. 2010 May 27;6(5):e1000922. doi: 10.1371/journal.ppat.1000922 (PMC2877748; doi:10.1371/journal.ppat.1000922)
Supplement: Table S2 — Comparison of B. pseudomallei genomes with that of strain K96243. (9.59 MB PDF) [file ppat.1000922.s004.pdf]

|               |                 |        |        |         |         |        |        |        |        |       |        |        |        |       |       |       |       |         |         |
|---------------|-----------------|--------|--------|---------|---------|--------|--------|--------|--------|-------|--------|--------|--------|-------|-------|-------|-------|---------|---------|
| 168           | BURPS1655_K1218 |        |        |         |         |        |        |        |        |       |        |        |        |       |       | 15459 | 15256 |         |         |
| 169           | BURPS1710A_0404 |        |        |         | 374671  | 374246 |        |        |        |       |        |        |        |       |       |       |       |         |         |
| 170           | BURPS668_0138   |        |        |         |         |        |        |        |        |       | 132905 | 133108 |        |       |       |       |       |         |         |
| 171           | BURPS668_0139   |        |        |         |         |        |        |        |        |       | 133092 | 134867 |        |       |       |       |       |         |         |
| 172           | BURPSS13_G0099  |        |        |         |         |        |        |        |        |       |        |        | 16078  | 17424 |       |       |       |         |         |
| 173           | BURPSS13_G0098  |        |        |         |         |        |        |        |        |       |        |        | 17529  | 18290 |       |       |       |         |         |
| 174           | BURPSS13_G0097  |        |        |         |         |        |        |        |        |       |        |        | 19577  | 18336 |       |       |       |         |         |
| 175           | BURPSS13_G0096  |        |        |         |         |        |        |        |        |       |        |        | 20479  | 21066 |       |       |       |         |         |
| 176           | BURPSS13_G0095  |        |        |         |         |        |        |        |        |       |        |        | 22087  | 21356 |       |       |       |         |         |
| 177           | BURPSS13_G0094  |        |        |         |         |        |        |        |        |       |        |        | 22411  | 24240 |       |       |       |         |         |
| 178           | BURPSS13_G0093  |        |        |         |         |        |        |        |        |       |        |        | 24308  | 24868 |       |       |       |         |         |
| 179           | BURPSS13_G0092  |        |        |         |         |        |        |        |        |       |        |        | 24904  | 25953 |       |       |       |         |         |
| 180           | BURPSS13_G0091  |        |        |         |         |        |        |        |        |       |        |        | 26270  | 26881 |       |       |       |         |         |
| 181           | BURPSS13_G0090  |        |        |         |         |        |        |        |        |       |        |        | 27198  | 27947 |       |       |       |         |         |
| 182           | BURPSS13_G0089  |        |        |         |         |        |        |        |        |       |        |        | 28140  | 29420 |       |       |       |         |         |
| 183           | BURPSS13_G0088  |        |        |         |         |        |        |        |        |       |        |        | 30226  | 32343 |       |       |       |         |         |
| 184           | BURPSS13_G0087  |        |        |         |         |        |        |        |        |       |        |        | 34921  | 34640 |       |       |       |         |         |
| 185           | BURPSS13_G0086  |        |        |         |         |        |        |        |        |       |        |        | 32347  | 34680 |       |       |       |         |         |
| 186           | BURPSS13_G0085  |        |        |         |         |        |        |        |        |       |        |        | 35084  | 38227 |       |       |       |         |         |
| 187           | BURPSS13_G0084  |        |        |         |         |        |        |        |        |       |        |        | 38230  | 40134 |       |       |       |         |         |
| 188           | BURPSS13_G0083  |        |        |         |         |        |        |        |        |       |        |        | 41568  | 40585 |       |       |       |         |         |
| 189           | BURPSS13_G0082  |        |        |         |         |        |        |        |        |       |        |        | 41542  | 41676 |       |       |       |         |         |
| 190           | BURPSS13_G0081  |        |        |         |         |        |        |        |        |       |        |        | 43369  | 41930 |       |       |       |         |         |
| 191           | BURPSS13_G0080  |        |        |         |         |        |        |        |        |       |        |        | 44646  | 43537 |       |       |       |         |         |
| 192           | BURPSS13_G0079  |        |        |         |         |        |        |        |        |       |        |        | 46026  | 44713 |       |       |       |         |         |
| 193           | BURPSS13_G0078  |        |        |         |         |        |        |        |        |       |        |        | 46289  | 46609 |       |       |       |         |         |
| 194           | BURPSS13_G0077  |        |        |         |         |        |        |        |        |       |        |        | 46922  | 46623 |       |       |       |         |         |
| 195           | BURPSS13_G0076  |        |        |         |         |        |        |        |        |       |        |        | 47857  | 47051 |       |       |       |         |         |
| 196           | BURPSS13_G0075  |        |        |         |         |        |        |        |        |       |        |        | 48949  | 47921 |       |       |       |         |         |
| 197           | BURPSS13_G0074  |        |        |         |         |        |        |        |        |       |        |        | 49857  | 48946 |       |       |       |         |         |
| 198           | BURPSS13_G0073  |        |        |         |         |        |        |        |        |       |        |        | 50891  | 49899 |       |       |       |         |         |
| 199           | BURPSS13_G0072  |        |        |         |         |        |        |        |        |       |        |        | 51935  | 50967 |       |       |       |         |         |
| 200           | BURPSS13_G0071  |        |        |         |         |        |        |        |        |       |        |        | 52069  | 52233 |       |       |       |         |         |
| 201           | BURPSS13_G0070  |        |        |         |         |        |        |        |        |       |        |        | 53331  | 52639 |       |       |       |         |         |
| 202           | BURPSS13_G0069  |        |        |         |         |        |        |        |        |       |        |        | 53780  | 55021 |       |       |       |         |         |
| 203           | BURPSS13_G0068  |        |        |         |         |        |        |        |        |       |        |        | 55497  | 57446 |       |       |       |         |         |
| 204           | BURPSS13_G0067  |        |        |         |         |        |        |        |        |       |        |        | 59033  | 57819 |       |       |       |         |         |
| 205           | BURPSS13_G0066  |        |        |         |         |        |        |        |        |       |        |        | 58981  | 60177 |       |       |       |         |         |
| 206 BPSL0114  |                 | 142499 | 142900 | 3390687 | 3391088 | 375260 | 375661 | 354311 | 354712 | 18294 | 18695  | 135259 | 135660 | 17721 | 18122 | 60936 | 61337 | 17609   | 18010   |
| 207 BPSL0115  |                 | 142941 | 143807 | 3391129 | 3391995 | 375702 | 376568 | 354753 | 355619 | 18736 | 19602  | 135701 | 136567 | 18163 | 19029 | 61378 | 62244 | 18051   | 18917   |
| 208 BPSL0116  |                 | 144947 | 143934 | 3393135 | 3392122 | 377708 | 376695 | 356759 | 355746 | 20742 | 19729  | 137707 | 136694 | 20169 | 19156 | 63384 | 62371 | 20058   | 19045   |
| 209 BPSL0117  |                 | 145386 | 146438 | 3393574 | 3394626 | 378147 | 379199 | 357198 | 358250 | 21181 | 22233  | 138146 | 139198 | 20608 | 21660 | 63823 | 64875 | 20497   | 21549   |
| 210 BPSL0118  |                 | 149275 | 146669 | 3397463 | 3394857 | 382033 | 379427 | 361084 | 358478 | 25070 | 22464  | 142034 | 139428 | 24494 | 21888 | 67709 | 65103 | 24383   | 21777   |
| 211 BPSL0119  |                 | 149857 | 149489 | 3398045 | 3397677 | 382615 | 382247 | 361666 | 361298 | 25652 | 25284  | 142616 | 142248 | 25076 | 24708 | 68291 | 67923 | 24965   | 24597   |
| 212 BPSL0120  |                 | 151041 | 149920 | 3399229 | 3398108 | 383799 | 382678 | 362850 | 361729 | 26836 | 25715  | 143800 | 142679 | 26260 | 25139 | 69475 | 68354 | 26149   | 25028   |
| 213 BPSL0121  |                 | 151336 | 151836 | 3399524 | 3400024 | 384094 | 384594 | 363145 | 363645 | 27131 | 27631  | 144095 | 144595 | 26555 | 27055 | 69770 | 70270 | 26444   | 26944   |
| 214 BPSL0122  |                 | 151871 | 152851 | 3400059 | 3401039 | 384629 | 385609 | 363680 | 364660 | 27666 | 28646  | 144630 | 145610 | 27090 | 28070 | 70305 | 71285 | 26979   | 27959   |
| 215 BPSL0123  |                 | 152975 | 153607 | 3401163 | 3401795 | 385733 | 386365 | 364784 | 365416 | 28770 | 29402  | 145734 | 146366 | 28194 | 28826 | 71409 | 72041 | 28083   | 28715   |
| 216 BPSL0124  |                 | 153720 | 154574 | 3401908 | 3402762 | 386478 | 387332 | 365529 | 366383 | 29515 | 30369  | 146479 | 147333 | 28939 | 29793 | 72154 | 73008 | 28828   | 29682   |
| 217           | BURPSS13_G0050  |        |        |         |         |        |        |        |        |       |        |        |        |       |       | 73176 | 73340 |         |         |
| 218 BPSL0125  |                 | 155171 | 156577 | 3403359 | 3404765 | 387823 | 389229 | 366874 | 368280 | 30862 | 32268  | 147778 | 149184 | 30276 | 31682 | 73453 | 74859 | 30287   | 31693   |
| 219 BPSL0126  |                 | 156577 | 157164 | 3404765 | 3405352 | 389229 | 389816 | 368280 | 368867 | 32268 | 32855  | 149184 | 149771 | 31682 | 32269 | 74859 | 75446 | 31693   | 32280   |
| 220 BPSL0127  |                 | 157169 | 159574 | 3405357 | 3407762 | 389821 | 392226 | 368872 | 371277 | 32860 | 35265  | 149776 | 152181 | 32274 | 34679 | 75451 | 77856 | 32285   | 34690   |
| 221 BPSL0128  |                 | 159578 | 160258 | 3407766 | 3408446 | 392230 | 392910 | 371281 | 371961 | 35269 | 35949  | 152185 | 152865 | 34683 | 35363 | 77860 | 78540 | 34694   | 35374   |
| 222 BPSL0129  |                 |        |        |         |         |        |        |        |        |       |        |        |        | 36568 | 35441 | 79735 | 78725 |         |         |
| 223 BPSL0130  |                 |        |        |         |         |        |        |        |        |       |        |        |        | 40228 | 37439 | 83395 | 80606 | 3784473 | 3787262 |
| 224           | BURPS1655_F0150 |        |        |         |         |        |        |        |        |       |        |        |        |       |       |       |       | 3788155 | 3789264 |
| 225 BPSL0130a |                 |        |        |         |         |        |        |        |        |       |        |        |        | 40494 | 40243 | 83661 | 83410 | 3784207 | 3784458 |



[illegible]













|     |                 |     |        |        |         |         |        |        |        |        |        |        |        |        |        |        |        |        |        |        |
|-----|-----------------|-----|--------|--------|---------|---------|--------|--------|--------|--------|--------|--------|--------|--------|--------|--------|--------|--------|--------|--------|
| 690 | BURPS1710b_0784 |     |        |        |         |         |        | 799489 | 801000 |        |        |        |        |        |        |        |        |        |        |        |
| 691 | BURPS1710b_0785 |     |        |        |         |         |        | 803661 | 803966 |        |        |        |        |        |        |        |        |        |        |        |
| 692 | BURPS1710b_0786 |     |        |        |         |         |        | 803960 | 804814 |        |        |        |        |        |        |        |        |        |        |        |
| 693 | BURPS406E_B0907 |     |        |        |         |         |        |        |        |        |        | 462007 | 460970 |        |        |        |        |        |        |        |
| 694 | BURPS406E_B0908 |     |        |        |         |         |        |        |        |        |        | 463229 | 462264 |        |        |        |        |        |        |        |
| 695 | BURPS406E_B0909 |     |        |        |         |         |        |        |        |        |        | 464744 | 464298 |        |        |        |        |        |        |        |
| 696 | BURPS406E_B0911 |     |        |        |         |         |        |        |        |        |        | 467377 | 468285 |        |        |        |        |        |        |        |
| 697 | BPSL0548        | GI3 |        |        |         |         |        |        |        |        |        |        |        |        |        |        |        |        |        |        |
| 698 | BPSL0549        | GI3 |        |        |         |         |        |        |        |        |        |        |        |        |        |        |        |        |        |        |
| 699 | BPSL0550        | GI3 |        |        |         |         |        |        |        |        |        |        |        |        |        |        |        |        |        |        |
| 700 | BPSL0551        | GI3 |        |        |         |         |        |        |        |        |        |        |        |        |        |        |        |        |        |        |
| 701 | BPSL0552        | GI3 |        |        |         |         |        |        |        |        |        |        |        |        |        |        |        |        |        |        |
| 702 | BPSL0553        | GI3 |        |        |         |         |        |        |        |        |        |        |        |        |        |        |        |        |        |        |
| 703 | BPSL0554        | GI3 |        |        |         |         |        |        |        |        |        |        |        |        |        |        |        |        |        |        |
| 704 | BPSL0555        | GI3 |        |        |         |         |        |        |        |        |        |        |        |        |        |        |        |        |        |        |
| 705 | BPSL0556        | GI3 |        |        |         |         |        |        |        |        |        |        |        |        |        |        |        |        |        |        |
| 706 | BPSL0557        | GI3 |        |        |         |         |        |        |        |        |        |        |        |        |        |        |        |        |        |        |
| 707 | BPSL0558        | GI3 |        |        |         |         |        |        |        |        |        |        |        |        |        |        |        |        |        |        |
| 708 | BPSL0559        | GI3 |        |        |         |         |        |        |        |        |        |        |        |        |        |        |        |        |        |        |
| 709 | BPSL0560        | GI3 |        |        |         |         |        |        |        |        |        |        |        |        |        |        |        |        |        |        |
| 710 | BPSL0561        | GI3 |        |        |         |         |        |        |        |        |        |        |        |        |        |        |        |        |        |        |
| 711 | BPSL0562        | GI3 |        |        |         |         |        |        |        |        |        |        |        |        |        |        |        |        |        |        |
| 712 | BPSL0563        | GI3 |        |        |         |         |        |        |        |        |        |        |        |        |        |        |        |        |        |        |
| 713 | BPSL0564        | GI3 |        |        |         |         |        |        |        |        |        |        |        |        |        |        |        |        |        |        |
| 714 | BPSL0565        | GI3 |        |        |         |         |        |        |        |        |        |        |        |        |        |        |        |        |        |        |
| 715 | BPSL0566        | GI3 |        |        |         |         |        |        |        |        |        |        |        |        |        |        |        |        |        |        |
| 716 | BPSL0567        | GI3 |        |        |         |         |        |        |        |        |        |        |        |        |        |        |        |        |        |        |
| 717 | BPSL0568        | GI3 |        |        |         |         |        |        |        |        |        |        |        |        |        |        |        |        |        |        |
| 718 | BPSL0569        | GI3 |        |        |         |         |        |        |        |        |        |        |        |        |        |        |        |        |        |        |
| 719 | BPSL0570        | GI3 |        |        |         |         |        |        |        |        |        |        |        |        |        |        |        |        |        |        |
| 720 | BPSL0571        | GI3 |        |        |         |         |        |        |        |        |        |        |        |        |        |        |        |        |        |        |
| 721 | BPSL0572        | GI3 |        |        |         |         |        |        |        |        |        |        |        |        |        |        |        |        |        |        |
| 722 | BPSL0573        | GI3 |        |        |         |         |        |        |        |        |        |        |        |        |        |        |        |        |        |        |
| 723 | BPSL0574        | GI3 |        |        |         |         |        |        |        |        |        |        |        |        |        |        |        |        |        |        |
| 724 | BPSL0575        | GI3 |        |        |         |         |        |        |        |        |        |        |        |        |        |        |        |        |        |        |
| 725 | BPSL0576        | GI3 |        |        |         |         |        |        |        |        |        |        |        |        |        |        |        |        |        |        |
| 726 | BPSL0577        | GI3 |        |        |         |         |        |        |        |        |        |        |        |        |        |        |        |        |        |        |
| 727 | BPSL0578        |     | 583144 | 582416 | 3831535 | 3830807 | 827696 | 826968 | 806258 | 805530 | 469855 | 469127 | 568382 | 567654 | 492274 | 491546 | 548392 | 547664 | 456678 | 456040 |
| 728 | BPSL0579        |     | 583488 | 585065 | 3831879 | 3833456 | 828039 | 829616 | 806601 | 808178 | 470199 | 471776 | 568730 | 570307 | 492618 | 494195 | 548735 | 550312 | 457021 | 458598 |
| 729 | BPSL0580        |     | 585517 | 585269 |         |         |        |        |        |        |        |        |        |        |        |        |        |        |        |        |







[illegible]

[illegible]













[illegible]



|      |                 |  |  |  |  |         |         |                 |
|------|-----------------|--|--|--|--|---------|---------|-----------------|
| 1502 | BURPSPAST_A1059 |  |  |  |  | 1048783 | 1048944 |                 |
| 1503 | BURPSPAST_A1060 |  |  |  |  | 1048640 | 1047960 |                 |
| 1504 | BURPSPAST_A1061 |  |  |  |  | 1047954 | 1047514 |                 |
| 1505 | BURPSPAST_A1062 |  |  |  |  | 1047514 | 1046198 |                 |
| 1506 | BURPSPAST_A1063 |  |  |  |  | 1046084 | 1045755 |                 |
| 1507 | BURPSPAST_A1064 |  |  |  |  | 1045746 | 1044967 |                 |
| 1508 | BURPSPAST_A1065 |  |  |  |  | 1044922 | 1044740 |                 |
| 1509 | BURPSPAST_A1066 |  |  |  |  | 1044585 | 1043734 |                 |
| 1510 | BURPSPAST_A1067 |  |  |  |  | 1042576 | 1043715 |                 |
| 1511 | BURPSPAST_A1069 |  |  |  |  | 1042178 | 1040964 |                 |
| 1512 | BURPSPAST_A1070 |  |  |  |  | 1039211 | 1037949 |                 |
| 1513 | BURPSPAST_A1072 |  |  |  |  | 1034279 | 1034623 |                 |
| 1514 | BURPSPAST_A1073 |  |  |  |  | 1033922 | 1034269 |                 |
| 1515 | BURPSPAST_A1074 |  |  |  |  | 1033750 | 1033929 |                 |
| 1516 | BURPSPAST_A1075 |  |  |  |  | 1033422 | 1033724 |                 |
| 1517 | BURPSPAST_A1076 |  |  |  |  | 1032622 | 1032897 |                 |
| 1518 | BURPSPAST_A1077 |  |  |  |  | 1031383 | 1032240 |                 |
| 1519 | BURPSPAST_A1078 |  |  |  |  | 1030227 | 1031228 |                 |
| 1520 | BURPSPAST_A1079 |  |  |  |  | 1029936 | 1029361 |                 |
| 1521 | BURPSPAST_A1080 |  |  |  |  | 1028746 | 1028630 |                 |
| 1522 | BURPSPAST_A1081 |  |  |  |  | 1027367 | 1028410 |                 |
| 1523 | BURPSPAST_A1086 |  |  |  |  | 1025310 | 1025510 |                 |
| 1524 | BURPSPAST_A1087 |  |  |  |  | 1025297 | 1024437 |                 |
| 1525 | BURPSPAST_A1088 |  |  |  |  | 1023558 | 1024412 |                 |
| 1526 | BURPSPAST_A1089 |  |  |  |  | 1023301 | 1023564 |                 |
| 1527 | BURPSPAST_A1090 |  |  |  |  | 1022727 | 1022876 |                 |
| 1528 | BURPSPAST_A1091 |  |  |  |  | 1022012 | 1022644 |                 |
| 1529 | BURPSPAST_A1092 |  |  |  |  | 1021690 | 1021887 |                 |
| 1530 | BURPSPAST_A1093 |  |  |  |  | 1019951 | 1021657 |                 |
| 1531 | BURPSPAST_A1094 |  |  |  |  | 1020043 | 1019924 |                 |
| 1532 | BURPSPAST_A1095 |  |  |  |  | 1019409 | 1019639 |                 |
| 1533 | BURPSPAST_A1096 |  |  |  |  | 1009882 | 1019277 |                 |
| 1534 | BURPSS13_I0022  |  |  |  |  |         |         | 1085580 1087376 |
| 1535 | BURPSS13_I0021  |  |  |  |  |         |         | 1088808 1088236 |
| 1536 | BURPSS13_I0011  |  |  |  |  |         |         | 1100400 1099111 |
| 1537 | BURPSS13_I0009  |  |  |  |  |         |         | 1100738 1101877 |
| 1538 | BURPSS13_I0008  |  |  |  |  |         |         | 1102882 1101896 |
| 1539 | BURPSS13_I0007  |  |  |  |  |         |         | 1103084 1102902 |
| 1540 | BURPSS13_I0006  |  |  |  |  |         |         | 1103914 1103129 |
| 1541 | BURPSS13_I0005  |  |  |  |  |         |         | 1104141 1103917 |
| 1542 | BURPSS13_I0004  |  |  |  |  |         |         | 1105867 1105418 |
| 1543 | BURPSS13_I0003  |  |  |  |  |         |         | 1106469 1105864 |
| 1544 | BURPSS13_I0002  |  |  |  |  |         |         | 1106801 1106466 |
| 1545 | BURPSS13_I0001  |  |  |  |  |         |         | 1107041 1106853 |
| 1546 | BURPSS13_H0001  |  |  |  |  |         |         | 1108263 1110755 |
| 1547 | BURPSS13_H0002  |  |  |  |  |         |         | 1110973 1111560 |
| 1548 | BURPSS13_H0003  |  |  |  |  |         |         | 1112281 1112162 |
| 1549 | BURPSS13_H0004  |  |  |  |  |         |         | 1113098 1112547 |
| 1550 | BURPSS13_H0005  |  |  |  |  |         |         | 1113103 1115214 |
| 1551 | BURPSS13_H0006  |  |  |  |  |         |         | 1115225 1115431 |
| 1552 | BURPSS13_H0007  |  |  |  |  |         |         | 1115428 1116921 |
| 1553 | BURPSS13_H0008  |  |  |  |  |         |         | 1116918 1118018 |
| 1554 | BURPSS13_H0009  |  |  |  |  |         |         | 1118045 1118389 |
| 1555 | BURPSS13_H0010  |  |  |  |  |         |         | 1118424 1119449 |
| 1556 | BURPSS13_H0011  |  |  |  |  |         |         | 1119453 1119743 |
| 1557 | BURPSS13_H0012  |  |  |  |  |         |         | 1119745 1120272 |
| 1558 | BURPSS13_H0013  |  |  |  |  |         |         | 1120265 1120798 |
| 1559 | BURPSS13_H001   |  |  |  |  |         |         |                 |

[illegible]



[illegible]





[illegible]



|      |                 |  |         |         |  |  |  |  |  |
|------|-----------------|--|---------|---------|--|--|--|--|--|
| 1966 | BURPS1710A_1873 |  | 1774417 | 1776726 |  |  |  |  |  |
| 1967 | BURPS1710A_1874 |  | 1776767 | 1777585 |  |  |  |  |  |
| 1968 | BURPS1710A_1875 |  | 1777646 | 1777776 |  |  |  |  |  |
| 1969 | BURPS1710A_1876 |  | 1777737 | 1777916 |  |  |  |  |  |
| 1970 | BURPS1710A_1877 |  | 1777999 | 1778205 |  |  |  |  |  |
| 1971 | BURPS1710A_1878 |  | 1780466 | 1779000 |  |  |  |  |  |
| 1972 | BURPS1710A_1880 |  | 1781828 | 1780728 |  |  |  |  |  |
| 1973 | BURPS1710A_1881 |  | 1782052 | 1781828 |  |  |  |  |  |
| 1974 | BURPS1710A_1882 |  | 1782098 | 1782322 |  |  |  |  |  |
| 1975 | BURPS1710A_1883 |  | 1782335 | 1782613 |  |  |  |  |  |
| 1976 | BURPS1710A_1884 |  | 1782622 | 1782867 |  |  |  |  |  |
| 1977 | BURPS1710A_1885 |  | 1783911 | 1782940 |  |  |  |  |  |
| 1978 | BURPS1710A_1886 |  | 1784246 | 1783908 |  |  |  |  |  |
| 1979 | BURPS1710A_1887 |  | 1784400 | 1784236 |  |  |  |  |  |
| 1980 | BURPS1710A_1888 |  | 1784728 | 1784471 |  |  |  |  |  |
| 1981 | BURPS1710A_1889 |  | 1786653 | 1784725 |  |  |  |  |  |
| 1982 | BURPS1710A_1890 |  | 1786946 | 1786668 |  |  |  |  |  |
| 1983 | BURPS1710A_1891 |  | 1787341 | 1786946 |  |  |  |  |  |
| 1984 | BURPS1710A_1892 |  | 1788009 | 1787344 |  |  |  |  |  |
| 1985 | BURPS1710A_1893 |  | 1788730 | 1788023 |  |  |  |  |  |
| 1986 | BURPS1710A_1894 |  | 1789561 | 1789004 |  |  |  |  |  |
| 1987 | BURPS1710A_1895 |  | 1790107 | 1789832 |  |  |  |  |  |
| 1988 | BURPS1710A_1896 |  | 1789620 | 1789858 |  |  |  |  |  |
| 1989 | BURPS1710A_1897 |  | 1790609 | 1791502 |  |  |  |  |  |
| 1990 | BURPS1710A_1898 |  | 1791657 | 1792946 |  |  |  |  |  |
| 1991 | BURPS1710A_1899 |  | 1794733 | 1794515 |  |  |  |  |  |
| 1992 | BURPS1710A_1900 |  | 1794402 | 1794518 |  |  |  |  |  |
| 1993 | BURPS1710A_1901 |  | 1794909 | 1795388 |  |  |  |  |  |
| 1994 | BURPS1710A_1902 |  | 1795952 | 1796620 |  |  |  |  |  |
| 1995 | BURPS1710A_1903 |  | 1796625 | 1797761 |  |  |  |  |  |
| 1996 | BURPS1710A_1904 |  | 1797758 | 1798048 |  |  |  |  |  |
| 1997 | BURPS1710A_1905 |  | 1798083 | 1798904 |  |  |  |  |  |
| 1998 | BURPS1710A_1906 |  | 1798901 | 1799161 |  |  |  |  |  |
| 1999 | BURPS1710A_1907 |  | 1799330 | 1800307 |  |  |  |  |  |
| 2000 | BURPS1710A_1908 |  | 1800991 | 1800833 |  |  |  |  |  |
| 2001 | BURPS1710A_1909 |  | 1800304 | 1800855 |  |  |  |  |  |
| 2002 | BURPS1710A_1910 |  | 1801237 | 1801662 |  |  |  |  |  |
| 2003 | BURPS1710A_1911 |  | 1801665 | 1801997 |  |  |  |  |  |
| 2004 | BURPS1710A_1912 |  | 1802048 | 1802233 |  |  |  |  |  |
| 2005 | BURPS1710A_1913 |  | 1802242 | 1802889 |  |  |  |  |  |
| 2006 | BURPS1710A_1914 |  | 1805082 | 1805306 |  |  |  |  |  |
| 2007 | BURPS1710A_1915 |  | 1805645 | 1809106 |  |  |  |  |  |
| 2008 | BURPS1710A_1916 |  | 1810287 | 1809901 |  |  |  |  |  |
| 2009 | BURPS1710A_1917 |  | 1810541 | 1810284 |  |  |  |  |  |
| 2010 | BURPS1710A_1918 |  | 1810602 | 1810958 |  |  |  |  |  |
| 2011 | BURPS1710A_1920 |  | 1811106 | 1811591 |  |  |  |  |  |
| 2012 | BURPS1710A_1921 |  | 1811601 | 1813316 |  |  |  |  |  |
| 2013 | BURPS1710A_1922 |  | 1813313 | 1814626 |  |  |  |  |  |
| 2014 | BURPS1710A_1923 |  | 1814607 | 1815293 |  |  |  |  |  |
| 2015 | BURPS1710A_1924 |  | 1815296 | 1816552 |  |  |  |  |  |
| 2016 | BURPS1710A_1925 |  | 1816844 | 1817206 |  |  |  |  |  |
| 2017 | BURPS1710A_1926 |  | 1817394 | 1817537 |  |  |  |  |  |
| 2018 | BURPS1710A_1927 |  | 1817530 | 1817952 |  |  |  |  |  |
| 2019 | BURPS1710A_1928 |  | 1817949 | 1818296 |  |  |  |  |  |
| 2020 | BURPS1710A_1929 |  | 1818358 | 1818816 |  |  |  |  |  |
| 2021 | BURPS1710A_1930 |  | 1818844 | 1819308 |  |  |  |  |  |
| 2022 | BURPS1710A_1931 |  | 1819308 | 1819592 |  |  |  |  |  |
| 2023 | BURPS1710A_1932 |  | 1819606 | 1823670 |  |  |  |  |  |

|      |                 |  |  |         |         |         |         |  |  |  |  |  |  |
|------|-----------------|--|--|---------|---------|---------|---------|--|--|--|--|--|--|
| 2024 | BURPS1710A_1933 |  |  | 1823640 | 1824005 |         |         |  |  |  |  |  |  |
| 2025 | BURPS1710A_1934 |  |  | 1824014 | 1825402 |         |         |  |  |  |  |  |  |
| 2026 | BURPS1710A_1935 |  |  | 1825399 | 1826082 |         |         |  |  |  |  |  |  |
| 2027 | BURPS1710A_1936 |  |  | 1826132 | 1826884 |         |         |  |  |  |  |  |  |
| 2028 | BURPS1710A_1937 |  |  | 1826881 | 1827465 |         |         |  |  |  |  |  |  |
| 2029 | BURPS1710A_1938 |  |  | 1827462 | 1830767 |         |         |  |  |  |  |  |  |
| 2030 | BURPS1710A_1939 |  |  | 1830872 | 1831078 |         |         |  |  |  |  |  |  |
| 2031 | BURPS1710A_1940 |  |  | 1831078 | 1831812 |         |         |  |  |  |  |  |  |
| 2032 | BURPS1710A_1941 |  |  | 1832114 | 1832551 |         |         |  |  |  |  |  |  |
| 2033 | BURPS1710A_1942 |  |  | 1832593 | 1833096 |         |         |  |  |  |  |  |  |
| 2034 | BURPS1710A_1943 |  |  | 1833239 | 1834027 |         |         |  |  |  |  |  |  |
| 2035 | BURPS1710A_1944 |  |  | 1834280 | 1835014 |         |         |  |  |  |  |  |  |
| 2036 | BURPS1710A_1945 |  |  | 1836515 | 1837606 |         |         |  |  |  |  |  |  |
| 2037 | BURPS1710A_1946 |  |  | 1838200 | 1837739 |         |         |  |  |  |  |  |  |
| 2038 | BURPS1710A_1947 |  |  | 1838592 | 1839137 |         |         |  |  |  |  |  |  |
| 2039 | BURPS1710b_1634 |  |  |         |         | 1719332 | 1722733 |  |  |  |  |  |  |
| 2040 | BURPS1710b_1635 |  |  |         |         | 1723302 | 1724042 |  |  |  |  |  |  |
| 2041 | BURPS1710b_1636 |  |  |         |         | 1724710 | 1726125 |  |  |  |  |  |  |
| 2042 | BURPS1710b_1637 |  |  |         |         | 1726129 | 1726473 |  |  |  |  |  |  |
| 2043 | BURPS1710b_1638 |  |  |         |         | 1726470 | 1729280 |  |  |  |  |  |  |
| 2044 | BURPS1710b_1639 |  |  |         |         | 1729277 | 1729717 |  |  |  |  |  |  |
| 2045 | BURPS1710b_1640 |  |  |         |         | 1733536 | 1734831 |  |  |  |  |  |  |
| 2046 | BURPS1710b_1641 |  |  |         |         | 1734880 | 1735473 |  |  |  |  |  |  |
| 2047 | BURPS1710b_1642 |  |  |         |         | 1735493 | 1737082 |  |  |  |  |  |  |
| 2048 | BURPS1710b_1643 |  |  |         |         | 1739515 | 1740384 |  |  |  |  |  |  |
| 2049 | BURPS1710b_1644 |  |  |         |         | 1740980 | 1741699 |  |  |  |  |  |  |
| 2050 | BURPS1710b_1645 |  |  |         |         | 1743707 | 1744078 |  |  |  |  |  |  |
| 2051 | BURPS1710b_1646 |  |  |         |         | 1744078 | 1744329 |  |  |  |  |  |  |
| 2052 | BURPS1710b_1647 |  |  |         |         | 1746068 | 1747363 |  |  |  |  |  |  |
| 2053 | BURPS1710b_1648 |  |  |         |         | 1748090 | 1749010 |  |  |  |  |  |  |
| 2054 | BURPS1710b_1649 |  |  |         |         | 1750026 | 1752350 |  |  |  |  |  |  |
| 2055 | BURPS1710b_1650 |  |  |         |         | 1752347 | 1753201 |  |  |  |  |  |  |
| 2056 | BURPS1710b_1651 |  |  |         |         | 1754913 | 1755701 |  |  |  |  |  |  |
| 2057 | BURPS1710b_1652 |  |  |         |         | 1758105 | 1760414 |  |  |  |  |  |  |
| 2058 | BURPS1710b_1653 |  |  |         |         | 1762688 | 1764136 |  |  |  |  |  |  |
| 2059 | BURPS1710b_1655 |  |  |         |         | 1764416 | 1765516 |  |  |  |  |  |  |
| 2060 | BURPS1710b_1656 |  |  |         |         | 1766023 | 1766301 |  |  |  |  |  |  |
| 2061 | BURPS1710b_1657 |  |  |         |         | 1766280 | 1766555 |  |  |  |  |  |  |
| 2062 | BURPS1710b_1658 |  |  |         |         | 1766628 | 1767638 |  |  |  |  |  |  |
| 2063 | BURPS1710b_1659 |  |  |         |         | 1768413 | 1770386 |  |  |  |  |  |  |
| 2064 | BURPS1710b_1660 |  |  |         |         | 1770634 | 1771029 |  |  |  |  |  |  |
| 2065 | BURPS1710b_1661 |  |  |         |         | 1771032 | 1771697 |  |  |  |  |  |  |
| 2066 | BURPS1710b_1662 |  |  |         |         | 1771711 | 1772505 |  |  |  |  |  |  |
| 2067 | BURPS1710b_1663 |  |  |         |         | 1772692 | 1773717 |  |  |  |  |  |  |
| 2068 | BURPS1710b_1664 |  |  |         |         | 1774932 | 1775462 |  |  |  |  |  |  |
| 2069 | BURPS1710b_1665 |  |  |         |         | 1775514 | 1775621 |  |  |  |  |  |  |
| 2070 | BURPS1710b_1666 |  |  |         |         | 1776280 | 1777434 |  |  |  |  |  |  |
| 2071 | BURPS1710b_1667 |  |  |         |         | 1777544 | 1778878 |  |  |  |  |  |  |
| 2072 | BURPS1710b_1668 |  |  |         |         | 1780841 | 1781320 |  |  |  |  |  |  |
| 2073 | BURPS1710b_1669 |  |  |         |         | 1781335 | 1782552 |  |  |  |  |  |  |
| 2074 | BURPS1710b_1670 |  |  |         |         | 1782557 | 1783693 |  |  |  |  |  |  |
| 2075 | BURPS1710b_1671 |  |  |         |         | 1784015 | 1784836 |  |  |  |  |  |  |
| 2076 | BURPS1710b_1672 |  |  |         |         | 1785304 | 1786239 |  |  |  |  |  |  |
| 2077 | BURPS1710b_1673 |  |  |         |         | 1786236 | 1786787 |  |  |  |  |  |  |
| 2078 | BURPS1710b_1674 |  |  |         |         | 1788174 | 1788821 |  |  |  |  |  |  |
| 2079 | BURPS1710b_1675 |  |  |         |         | 1791577 | 1795038 |  |  |  |  |  |  |
| 2080 | BURPS1710b_1676 |  |  |         |         | 1795833 | 1796300 |  |  |  |  |  |  |
| 2081 | BURPS1710b_1677 |  |  |         |         | 1796534 | 1796890 |  |  |  |  |  |  |

|               |                   |         |         |        |        |         |         |         |         |         |         |         |         |         |         |         |         |         |         |
|---------------|-------------------|---------|---------|--------|--------|---------|---------|---------|---------|---------|---------|---------|---------|---------|---------|---------|---------|---------|---------|
| 2082          | BURPS1710b_1678   |         |         |        |        |         | 1797038 | 1797523 |         |         |         |         |         |         |         |         |         |         |         |
| 2083          | BURPS1710b_1679   |         |         |        |        |         | 1797524 | 1799248 |         |         |         |         |         |         |         |         |         |         |         |
| 2084          | BURPS1710b_1680   |         |         |        |        |         | 1799308 | 1800558 |         |         |         |         |         |         |         |         |         |         |         |
| 2085          | BURPS1710b_1681   |         |         |        |        |         | 1800539 | 1801225 |         |         |         |         |         |         |         |         |         |         |         |
| 2086          | BURPS1710b_1682   |         |         |        |        |         | 1801228 | 1802484 |         |         |         |         |         |         |         |         |         |         |         |
| 2087          | BURPS1710b_1683   |         |         |        |        |         | 1802776 | 1803138 |         |         |         |         |         |         |         |         |         |         |         |
| 2088          | BURPS1710b_1684   |         |         |        |        |         | 1803462 | 1803884 |         |         |         |         |         |         |         |         |         |         |         |
| 2089          | BURPS1710b_1685   |         |         |        |        |         | 1803881 | 1804228 |         |         |         |         |         |         |         |         |         |         |         |
| 2090          | BURPS1710b_1686   |         |         |        |        |         | 1804290 | 1804748 |         |         |         |         |         |         |         |         |         |         |         |
| 2091          | BURPS1710b_1687   |         |         |        |        |         | 1804776 | 1805240 |         |         |         |         |         |         |         |         |         |         |         |
| 2092          | BURPS1710b_1688   |         |         |        |        |         | 1805538 | 1809602 |         |         |         |         |         |         |         |         |         |         |         |
| 2093          | BURPS1710b_1689   |         |         |        |        |         | 1809599 | 1809937 |         |         |         |         |         |         |         |         |         |         |         |
| 2094          | BURPS1710b_1690   |         |         |        |        |         | 1809946 | 1811334 |         |         |         |         |         |         |         |         |         |         |         |
| 2095          | BURPS1710b_1691   |         |         |        |        |         | 1811331 | 1812014 |         |         |         |         |         |         |         |         |         |         |         |
| 2096          | BURPS1710b_1692   |         |         |        |        |         | 1812064 | 1812816 |         |         |         |         |         |         |         |         |         |         |         |
| 2097          | BURPS1710b_1693   |         |         |        |        |         | 1812831 | 1813397 |         |         |         |         |         |         |         |         |         |         |         |
| 2098          | BURPS1710b_1694   |         |         |        |        |         | 1813421 | 1816699 |         |         |         |         |         |         |         |         |         |         |         |
| 2099          | BURPS1710b_1695   |         |         |        |        |         | 1817992 | 1818483 |         |         |         |         |         |         |         |         |         |         |         |
| 2100          | BURPS1710b_1696   |         |         |        |        |         | 1818483 | 1819028 |         |         |         |         |         |         |         |         |         |         |         |
| 2101          | BURPS1710b_1697   |         |         |        |        |         | 1819171 | 1819959 |         |         |         |         |         |         |         |         |         |         |         |
| 2102          | BURPS1710b_1698   |         |         |        |        |         | 1820212 | 1820946 |         |         |         |         |         |         |         |         |         |         |         |
| 2103          | BURPS1710b_1699   |         |         |        |        |         | 1822420 | 1823538 |         |         |         |         |         |         |         |         |         |         |         |
| 2104          | BURPS1710b_1700   |         |         |        |        |         | 1823671 | 1824312 |         |         |         |         |         |         |         |         |         |         |         |
| 2105          | BURPS1710b_1701   |         |         |        |        |         | 1824368 | 1825069 |         |         |         |         |         |         |         |         |         |         |         |
| 2106 BPSL1374 |                   | 1489124 | 1489582 | 757886 | 758344 | 1839573 | 1840037 | 1825505 | 1825969 | 2688248 | 2687790 | 1466737 | 1467195 | 2309892 | 2309434 | 1505353 | 1505811 | 2292633 | 2292175 |
| 2107 BPSL1375 |                   | 1489737 | 1490552 | 758499 | 759314 | 1840192 | 1841007 | 1826124 | 1826939 | 2687635 | 2686820 | 1467350 | 1468165 | 2309279 | 2308464 | 1505966 | 1506781 | 2292020 | 2291205 |
| 2108 BPSL1376 |                   | 1491152 | 1490892 | 759914 | 759654 | 1841625 | 1841365 | 1827557 | 1827297 | 2686220 | 2686480 | 1468764 | 1468504 | 2307847 | 2308107 | 1507380 | 1507120 | 2290606 | 2290866 |
| 2109 BPSL1377 |                   | 1491227 | 1491415 | 759989 | 760177 | 1841700 | 1841888 | 1827632 | 1827820 | 2686145 | 2685957 | 1468839 | 1469027 | 2307772 | 2307584 | 1507455 | 1507643 | 2290531 | 2290343 |
| 2110 BPSL1378 |                   | 1493063 | 1491675 | 761825 | 760437 | 1843551 | 1842163 | 1829483 | 1828095 | 2684309 | 2685697 | 1470681 | 1469293 | 2305928 | 2307316 | 1509292 | 1507904 | 2288680 | 2290068 |
| 2111 BPSL1379 |                   | 1493421 | 1493074 | 762183 | 761836 | 1843909 | 1843562 | 1829841 | 1829494 | 2683951 | 2684298 | 1471039 | 1470692 | 2305570 | 2305917 | 1509650 | 1509303 | 2288322 | 2288669 |
| 2112 BPSL1380 |                   | 1495320 | 1493656 | 764082 | 762418 | 1845841 | 1844177 | 1831773 | 1830109 | 2682052 | 2683716 | 1472971 | 1471307 | 2303638 | 2305302 | 1511582 | 1509918 | 2286390 | 2288051 |
| 2113 BPSL1381 |                   | 1496347 | 1495637 | 765109 | 764399 | 1846868 | 1846158 | 1832800 | 1832090 | 2681025 | 2681735 | 1474003 | 1473284 | 2302611 | 2303321 | 1512609 | 1511899 | 2285363 | 2286073 |
| 2114 BPSL1382 |                   | 1497540 | 1496635 | 766302 | 765397 | 1848061 | 1847156 | 1833993 | 1833088 | 2679832 | 2680737 | 1475195 | 1474290 | 2301418 | 2302323 | 1513802 | 1512897 | 2284170 | 2285075 |
| 2115 BPSL1383 |                   | 1498088 | 1498915 | 766850 | 767677 | 1848609 | 1849436 | 1834541 | 1835368 | 2679284 | 2678457 | 1475743 | 1476570 | 2300870 | 2300043 | 1514350 | 1515177 | 2283622 | 2282795 |
| 2117          | BURPS1710A_1962   |         |         |        |        | 1850635 | 1850925 |         |         |         |         |         |         |         |         |         |         |         |         |
| 2118          | BURPS1710A_1963   |         |         |        |        | 1852962 | 1855736 |         |         |         |         |         |         |         |         |         |         |         |         |
| 2119          | BURPS1710A_1964   |         |         |        |        | 1855822 | 1857399 |         |         |         |         |         |         |         |         |         |         |         |         |
| 2120          | BURPS1710A_1965   |         |         |        |        | 1857783 | 1858013 |         |         |         |         |         |         |         |         |         |         |         |         |
| 2121          | BURPS1710A_1966   |         |         |        |        | 1858866 | 1859102 |         |         |         |         |         |         |         |         |         |         |         |         |
| 2122          | BURPS1710A_1967   |         |         |        |        | 1859600 | 1860001 |         |         |         |         |         |         |         |         |         |         |         |         |
| 2123          | BURPS1710A_1968   |         |         |        |        | 1861599 | 1860778 |         |         |         |         |         |         |         |         |         |         |         |         |
| 2124          | BURPS1710A_1969   |         |         |        |        | 1862046 | 1861786 |         |         |         |         |         |         |         |         |         |         |         |         |
| 2125          | Bp_chr1_17_IS407A |         |         |        |        | 1862107 | 1863342 | 1848039 | 1849274 |         |         |         |         |         |         |         |         |         |         |
| 2126          | BURPS1710A_1972   |         |         |        |        | 1863798 | 1864904 |         |         |         |         |         |         |         |         |         |         |         |         |
| 2127          | BURPS1710A_1973   |         |         |        |        | 1866663 | 1866544 |         |         |         |         |         |         |         |         |         |         |         |         |
| 2128          | BURPS1710b_1715   |         |         |        |        |         |         | 1836567 | 1836857 |         |         |         |         |         |         |         |         |         |         |
| 2129          | BURPS1710b_1716   |         |         |        |        |         |         | 1838894 | 1841668 |         |         |         |         |         |         |         |         |         |         |
| 2130          | BURPS1710b_1717   |         |         |        |        |         |         | 1841754 | 1843331 |         |         |         |         |         |         |         |         |         |         |
| 2131          | BURPS1710b_1718   |         |         |        |        |         |         | 1845532 | 1845933 |         |         |         |         |         |         |         |         |         |         |
| 2132          | BURPS1710b_1721   |         |         |        |        |         |         | 1851765 | 1852124 |         |         |         |         |         |         |         |         |         |         |
| 2133          | BURPS1710b_1722   |         |         |        |        |         |         | 1853156 | 1854175 |         |         |         |         |         |         |         |         |         |         |
| 2134          | BURPS668_1515     |         |         |        |        |         |         |         |         | 1478230 | 1478352 |         |         |         |         |         |         |         |         |
| 2135          | BURPS668_1516     |         |         |        |        |         |         |         |         | 1478529 | 1478657 |         |         |         |         |         |         |         |         |
| 2136          | BURPS668_1517     |         |         |        |        |         |         |         |         | 1480168 | 1482942 |         |         |         |         |         |         |         |         |
| 2137          | BURPS668_1518     |         |         |        |        |         |         |         |         | 1483430 | 1484104 |         |         |         |         |         |         |         |         |
| 2138          | BURPS668_1519     |         |         |        |        |         |         |         |         | 1484471 | 1484611 |         |         |         |         |         |         |         |         |
| 2139          | BURPS668_1520     |         |         |        |        |         |         |         |         | 1484811 | 1484960 |         |         |         |         |         |         |         |         |
| 2140          | BURPS668_1521     |         |         |        |        |         |         |         |         | 1485258 | 1485413 |         |         |         |         |         |         |         |         |









































|      |                   |  |  |  |         |                 |         |         |
|------|-------------------|--|--|--|---------|-----------------|---------|---------|
| 3301 | BURPS406E_H0386   |  |  |  | 1565580 | 1565221         |         |         |
| 3302 | BURPS406E_H0385   |  |  |  | 1564628 | 1563813         |         |         |
| 3303 | BURPS406E_H0384   |  |  |  | 1563418 | 1562900         |         |         |
| 3304 | BURPS406E_H0383   |  |  |  | 1562805 | 1562203         |         |         |
| 3305 | BURPS406E_H0382   |  |  |  | 1562108 | 1561458         |         |         |
| 3306 | BURPS406E_H0381   |  |  |  | 1561396 | 1560287         |         |         |
| 3307 | BURPS406E_H0380   |  |  |  | 1560188 | 1559892         |         |         |
| 3308 | BURPS406E_H0379   |  |  |  | 1559806 | 1557539         |         |         |
| 3309 | BURPS406E_H0378   |  |  |  | 1556882 | 1556580         |         |         |
| 3310 | BURPS406E_H0377   |  |  |  | 1556583 | 1555723         |         |         |
| 3311 | BURPS406E_H0376   |  |  |  | 1555605 | 1554382         |         |         |
| 3312 | Bp_chrl_32_JS8ma1 |  |  |  | 1553380 | 1554229         |         |         |
| 3313 | BURPS406E_H0375   |  |  |  | 1553726 | 1554226         |         |         |
| 3314 | BURPS406E_H0374   |  |  |  | 1552802 | 1553653         |         |         |
| 3315 | BURPS406E_H0372   |  |  |  | 1552582 | 1551509         |         |         |
| 3316 | BURPS406E_H0373   |  |  |  | 1552515 | 1552805         |         |         |
| 3317 | BURPS406E_H0371   |  |  |  | 1548802 | 1550754         |         |         |
| 3318 | BURPS406E_H0370   |  |  |  | 1543926 | 1548821         |         |         |
| 3319 | BURPS406E_H0369   |  |  |  | 1541134 | 1543929         |         |         |
| 3320 | BURPS406E_H0368   |  |  |  | 1535855 | 1541122         |         |         |
| 3321 | BURPS668_2539     |  |  |  |         | 2510793 2511260 |         |         |
| 3322 | BURPSS13_P1199    |  |  |  |         |                 | 2571490 | 2572728 |
| 3323 | BURPSS13_P1200    |  |  |  |         |                 | 2573931 | 2572804 |
| 3324 | BURPSS13_P1201    |  |  |  |         |                 | 2574623 | 2573892 |
| 3325 | BURPSS13_P1202    |  |  |  |         |                 | 2575141 | 2574620 |
| 3326 | BURPSS13_P1203    |  |  |  |         |                 | 2576125 | 2576352 |
| 3327 | BURPSS13_P1204    |  |  |  |         |                 | 2576376 | 2577248 |
| 3328 | BURPSS13_P1205    |  |  |  |         |                 | 2577254 | 2578948 |
| 3329 | BURPSS13_P1206    |  |  |  |         |                 | 2578948 | 2579508 |
| 3330 | BURPSS13_P1207    |  |  |  |         |                 | 2579512 | 2580666 |
| 3331 | BURPSS13_P1208    |  |  |  |         |                 | 2581055 | 2584456 |
| 3332 | BURPSS13_P1209    |  |  |  |         |                 | 2584633 | 2585433 |
| 3333 | BURPSS13_P1210    |  |  |  |         |                 | 2585430 | 2585969 |
| 3334 | BURPSS13_P1211    |  |  |  |         |                 | 2585966 | 2586379 |
| 3335 | BURPSS13_P1212    |  |  |  |         |                 | 2586572 | 2588602 |
| 3336 | BURPSS13_P1213    |  |  |  |         |                 | 2590280 | 2589039 |
| 3337 | BURPSS13_P1214    |  |  |  |         |                 | 2590616 | 2590921 |
| 3338 | BURPSS13_P1215    |  |  |  |         |                 | 2590941 | 2591330 |
| 3339 | BURPSS13_P1216    |  |  |  |         |                 | 2591468 | 2592181 |
| 3340 | BURPSS13_P1217    |  |  |  |         |                 | 2592300 | 2593094 |
| 3341 | BURPSS13_P1218    |  |  |  |         |                 | 2593208 | 2593567 |
| 3342 | BURPSS13_P1219    |  |  |  |         |                 | 2593914 | 2593666 |
| 3343 | BURPSS13_P1220    |  |  |  |         |                 | 2594370 | 2594888 |
| 3344 | BURPSS13_P1221    |  |  |  |         |                 | 2594982 | 2595584 |
| 3345 | BURPSS13_P1222    |  |  |  |         |                 | 2595623 | 2596336 |
| 3346 | BURPSS13_P1223    |  |  |  |         |                 | 2596398 | 2597507 |
| 3347 | BURPSS13_P1224    |  |  |  |         |                 | 2597603 | 2597896 |
| 3348 | BURPSS13_P1225    |  |  |  |         |                 | 2597981 | 2600248 |
| 3349 | BURPSS13_P1226    |  |  |  |         |                 | 2602266 | 2602150 |
| 3350 | BURPSS13_P1227    |  |  |  |         |                 | 2600376 | 2602169 |
| 3351 | BURPSS13_P1228    |  |  |  |         |                 | 2602447 | 2602686 |
| 3352 | BURPSS13_P1229    |  |  |  |         |                 | 2602812 | 2603414 |
| 3353 | BURPSS13_P1230    |  |  |  |         |                 | 2604053 | 2604775 |
| 3354 | BURPSS13_P1231    |  |  |  |         |                 | 2604772 | 2605329 |
| 3355 | BURPSS13_P1232    |  |  |  |         |                 | 2605343 | 2605864 |
| 3356 | BURPSS13_P1233    |  |  |  |         |                 | 2605866 | 2608025 |
| 3357 | BURPSS13_P1234    |  |  |  |         |                 | 2608045 | 2608791 |
| 3358 | BURPSS13_P1235    |  |  |  |         |                 | 2610595 | 2609420 |

|               |                |         |         |         |         |         |         |         |         |         |         |         |         |         |         |         |         |         |         |
|---------------|----------------|---------|---------|---------|---------|---------|---------|---------|---------|---------|---------|---------|---------|---------|---------|---------|---------|---------|---------|
| 3359          | BURPSS13_P1236 |         |         |         |         |         |         |         |         |         |         |         |         |         | 2610869 | 2610570 |         |         |         |
| 3360          | BURPSS13_P1237 |         |         |         |         |         |         |         |         |         |         |         |         |         | 2612979 | 2613329 |         |         |         |
| 3361          | BURPSS13_P1238 |         |         |         |         |         |         |         |         |         |         |         |         |         | 2613326 | 2613565 |         |         |         |
| 3362          | BURPSS13_P1239 |         |         |         |         |         |         |         |         |         |         |         |         |         | 2613582 | 2613953 |         |         |         |
| 3363          | BURPSS13_P1240 |         |         |         |         |         |         |         |         |         |         |         |         |         | 2613961 | 2614383 |         |         |         |
| 3364          | BURPSS13_P1241 |         |         |         |         |         |         |         |         |         |         |         |         |         | 2614380 | 2615057 |         |         |         |
| 3365          | BURPSS13_P1242 |         |         |         |         |         |         |         |         |         |         |         |         |         | 2615066 | 2615941 |         |         |         |
| 3366          | BURPSS13_P1243 |         |         |         |         |         |         |         |         |         |         |         |         |         | 2615931 | 2617397 |         |         |         |
| 3367          | BURPSS13_P1244 |         |         |         |         |         |         |         |         |         |         |         |         |         | 2617402 | 2617809 |         |         |         |
| 3368          | BURPSS13_P1245 |         |         |         |         |         |         |         |         |         |         |         |         |         | 2617809 | 2620697 |         |         |         |
| 3369          | BURPSS13_P1246 |         |         |         |         |         |         |         |         |         |         |         |         |         | 2620694 | 2621440 |         |         |         |
| 3370          | BURPSS13_P1247 |         |         |         |         |         |         |         |         |         |         |         |         |         | 2621642 | 2622139 |         |         |         |
| 3371          | BURPSS13_P1248 |         |         |         |         |         |         |         |         |         |         |         |         |         | 2622535 | 2624652 |         |         |         |
| 3372          | BURPSS13_P1249 |         |         |         |         |         |         |         |         |         |         |         |         |         | 2624885 | 2625070 |         |         |         |
| 3373          | BURPSS13_P1250 |         |         |         |         |         |         |         |         |         |         |         |         |         | 2625100 | 2625441 |         |         |         |
| 3374          | BURPSS13_P1251 |         |         |         |         |         |         |         |         |         |         |         |         |         | 2631960 | 2626711 |         |         |         |
| 3375          | BURPSS13_P1252 |         |         |         |         |         |         |         |         |         |         |         |         |         | 2634531 | 2632063 |         |         |         |
| 3376          | BURPSS13_P1253 |         |         |         |         |         |         |         |         |         |         |         |         |         | 2634769 | 2636031 |         |         |         |
| 3377          | BURPSS13_P1254 |         |         |         |         |         |         |         |         |         |         |         |         |         | 2636522 | 2636722 |         |         |         |
| 3378          | BURPSS13_P1255 |         |         |         |         |         |         |         |         |         |         |         |         |         | 2636752 | 2637795 |         |         |         |
| 3379          | BURPSS13_P1256 |         |         |         |         |         |         |         |         |         |         |         |         |         | 2638368 | 2637820 |         |         |         |
| 3380          | BURPSS13_P1257 |         |         |         |         |         |         |         |         |         |         |         |         |         | 2639458 | 2638358 |         |         |         |
| 3381          | BURPSS13_P1258 |         |         |         |         |         |         |         |         |         |         |         |         |         | 2639831 | 2640931 |         |         |         |
| 3382          | BURPSS13_P1259 |         |         |         |         |         |         |         |         |         |         |         |         |         | 2642154 | 2640964 |         |         |         |
| 3383          | BURPSS13_P1260 |         |         |         |         |         |         |         |         |         |         |         |         |         | 2643474 | 2642296 |         |         |         |
| 3384          | BURPSS13_P1261 |         |         |         |         |         |         |         |         |         |         |         |         |         | 2644889 | 2643471 |         |         |         |
| 3385          | BURPSS13_P1262 |         |         |         |         |         |         |         |         |         |         |         |         |         | 2645145 | 2644843 |         |         |         |
| 3386          | BURPSS13_P1263 |         |         |         |         |         |         |         |         |         |         |         |         |         | 2645936 | 2645142 |         |         |         |
| 3387          | BURPSS13_P1264 |         |         |         |         |         |         |         |         |         |         |         |         |         | 2646829 | 2645933 |         |         |         |
| 3388          | BURPSS13_P1265 |         |         |         |         |         |         |         |         |         |         |         |         |         | 2647928 | 2646822 |         |         |         |
| 3389          | BURPSS13_P1266 |         |         |         |         |         |         |         |         |         |         |         |         |         | 2649041 | 2647968 |         |         |         |
| 3390          | BURPSS13_P1267 |         |         |         |         |         |         |         |         |         |         |         |         |         | 2649150 | 2650094 |         |         |         |
| 3391          | BURPSS13_P1268 |         |         |         |         |         |         |         |         |         |         |         |         |         | 2650192 | 2651802 |         |         |         |
| 3392          | BURPSS13_P1269 |         |         |         |         |         |         |         |         |         |         |         |         |         | 2651772 | 2652803 |         |         |         |
| 3393          | BURPSS13_P1270 |         |         |         |         |         |         |         |         |         |         |         |         |         | 2652891 | 2653358 |         |         |         |
| 3394          | BURPSS13_P1271 |         |         |         |         |         |         |         |         |         |         |         |         |         | 2653355 | 2654296 |         |         |         |
| 3395          | BURPSS13_P1272 |         |         |         |         |         |         |         |         |         |         |         |         |         | 2654248 | 2655717 |         |         |         |
| 3396          | BURPSS13_P1273 |         |         |         |         |         |         |         |         |         |         |         |         |         | 2655714 | 2656061 |         |         |         |
| 3397          | BURPSS13_P1274 |         |         |         |         |         |         |         |         |         |         |         |         |         | 2656074 | 2657579 |         |         |         |
| 3398          | BURPSS13_P1275 |         |         |         |         |         |         |         |         |         |         |         |         |         | 2657816 | 2657589 |         |         |         |
| 3399          | BURPSS13_P1276 |         |         |         |         |         |         |         |         |         |         |         |         |         | 2658160 | 2658918 |         |         |         |
| 3400          | BURPSS13_P1277 |         |         |         |         |         |         |         |         |         |         |         |         |         | 2658911 | 2659831 |         |         |         |
| 3401          | BURPSS13_P1278 |         |         |         |         |         |         |         |         |         |         |         |         |         | 2661979 | 2660480 |         |         |         |
| 3402          | BURPSS13_P1279 |         |         |         |         |         |         |         |         |         |         |         |         |         | 2662418 | 2664337 |         |         |         |
| 3403          | BURPSS13_P1280 |         |         |         |         |         |         |         |         |         |         |         |         |         | 2664536 | 2667418 |         |         |         |
| 3404          | BURPSS13_P1281 |         |         |         |         |         |         |         |         |         |         |         |         |         | 2667415 | 2669211 |         |         |         |
| 3405          | BURPSS13_P1282 |         |         |         |         |         |         |         |         |         |         |         |         |         | 2671663 | 2674392 |         |         |         |
| 3406          | BURPSS13_P1283 |         |         |         |         |         |         |         |         |         |         |         |         |         | 2674513 | 2676282 |         |         |         |
| 3407 BPSL2239 |                | 2557807 | 2556560 | 1825526 | 1824279 | 2987848 | 2986601 | 2971662 | 2970415 | 1533501 | 1534748 | 2512659 | 2511412 | 2543131 | 2541884 | 2678109 | 2676862 | 2526610 | 2525363 |
| 3408 BPSL2240 |                | 2559626 | 2558151 | 1827345 | 1825870 | 2989667 | 2988192 | 2973481 | 2972006 | 1531691 | 1533157 | 2514469 | 2513003 | 2544950 | 2543475 | 2679928 | 2678453 | 2528420 | 2526954 |
| 3409 BPSL2241 |                | 2560641 | 2559673 | 1828360 | 1827392 | 2990682 | 2989714 | 2974496 | 2973528 | 1530676 | 1531644 | 2515484 | 2514516 | 2545965 | 2544997 | 2680943 | 2679975 | 2529435 | 2528467 |
| 3410 BPSL2242 |                | 2561683 | 2560748 | 1829402 | 1828467 | 2991724 | 2990789 | 2975538 | 2974603 | 1529634 | 1530569 | 2516526 | 2515591 | 2547007 | 2546072 | 2681985 | 2681050 | 2530477 | 2529542 |
| 3411 BPSL2243 |                | 2563128 | 2561734 | 1830847 | 1829453 | 2993169 | 2991775 | 2976983 | 2975589 | 1528189 | 1529583 | 2517971 | 2516577 | 2548452 | 2547058 | 2683430 | 2682036 | 2531922 | 2530528 |
| 3412 BPSL2244 |                | 2563417 | 2564079 | 1831136 | 1831798 | 2993458 | 2994120 | 2977272 | 2977934 | 1527900 | 1527238 | 2518260 | 2518922 | 2548741 | 2549403 | 2683719 | 2684381 | 2532211 | 2532873 |
| 3413 BPSL2245 |                | 2564139 | 2564711 | 1831858 | 1832430 | 2994180 | 2994752 | 2977994 | 2978566 | 1527178 | 1526606 | 2518982 | 2519554 | 2549463 | 2550035 | 2684441 | 2685013 | 2532933 | 2533505 |
| 3414 BPSL2246 |                | 2564795 | 2565283 | 1832514 | 1833002 | 2994836 | 2995324 | 2978650 | 2979138 | 1526522 | 1526034 | 2519638 | 2520126 | 2550119 | 2550193 | 2685097 | 2685585 | 2533589 | 2534077 |
| 3415 BPSL2247 |                | 2565350 | 2566108 | 1833069 | 1833827 | 2995391 | 2996149 | 2979205 | 2979963 | 1525967 | 1525209 | 2520193 | 2520951 | 2550790 | 2551548 | 2685652 | 2686410 | 2534144 | 2534902 |
| 3416 BPSL2248 |                | 2567232 | 2566450 | 1834951 | 1834169 | 2997273 | 2996491 | 2981087 | 2980305 | 1524085 | 1524867 | 2522074 | 2521292 | 2552672 | 2551890 | 2687534 | 2686752 | 2536026 | 2535244 |

|               |                  |                 |         |         |         |         |         |         |         |         |         |         |         |         |         |         |         |         |         |
|---------------|------------------|-----------------|---------|---------|---------|---------|---------|---------|---------|---------|---------|---------|---------|---------|---------|---------|---------|---------|---------|
| 3417 BPSL2249 |                  | 2568358         | 2567426 | 1836077 | 1835145 | 2998398 | 2997466 | 2982212 | 2981280 | 1522989 | 1523891 | 2523176 | 2522268 | 2553791 | 2552865 | 2688654 | 2687728 | 2537122 | 2536220 |
| 3418 BPSL2250 |                  | 2568659         | 2569459 | 1836378 | 1837178 | 2998699 | 2999499 | 2982513 | 2983313 | 1522688 | 1521888 | 2523477 | 2524277 | 2554092 | 2554892 | 2688955 | 2689755 | 2537423 | 2538223 |
| 3419 BPSL2251 |                  | 2570014         | 2569745 | 1837733 | 1837464 | 3000042 | 2999773 | 2983856 | 2983587 | 1521333 | 1521602 | 2524821 | 2524552 | 2555447 | 2555178 | 2690310 | 2690041 | 2538778 | 2538509 |
| 3420          |                  | Bp_chr1_33_ISBr | 2570546 | 2571850 | 1838265 | 1839569 |         |         |         |         |         |         |         |         |         | 2690842 | 2692146 |         |         |
| 3421          | BURPSS1106A_2608 |                 | 2570687 | 2571847 |         |         |         |         |         |         |         |         |         |         |         |         |         |         |         |
| 3422          | BURPSS13_P1305   |                 |         |         |         |         |         |         |         |         |         |         |         |         |         | 2694094 | 2693261 |         |         |
| 3423          | BURPSS13_P1306   |                 |         |         |         |         |         |         |         |         |         |         |         |         |         | 2695230 | 2694091 |         |         |
| 3424          | BURPSS13_P1307   |                 |         |         |         |         |         |         |         |         |         |         |         |         |         | 2695694 | 2695855 |         |         |
| 3425          | BURPSS13_P1308   |                 |         |         |         |         |         |         |         |         |         |         |         |         |         | 2697835 | 2695883 |         |         |
| 3426          | BURPSS13_P1309   |                 |         |         |         |         |         |         |         |         |         |         |         |         |         | 2698629 | 2698180 |         |         |
| 3427          | BURPSS13_P1310   |                 |         |         |         |         |         |         |         |         |         |         |         |         |         | 2698619 | 2698879 |         |         |
| 3428          | BURPSS13_P1311   |                 |         |         |         |         |         |         |         |         |         |         |         |         |         | 2700143 | 2699187 |         |         |
| 3429          | BURPSS13_P1312   |                 |         |         |         |         |         |         |         |         |         |         |         |         |         | 2700435 | 2700118 |         |         |
| 3430          | BURPSS13_P1316   |                 |         |         |         |         |         |         |         |         |         |         |         |         |         | 2702862 | 2703518 |         |         |
| 3431          | BURPSS13_P1317   |                 |         |         |         |         |         |         |         |         |         |         |         |         |         | 2703515 | 2704258 |         |         |
| 3432          | BURPSS13_P1318   |                 |         |         |         |         |         |         |         |         |         |         |         |         |         | 2705082 | 2704294 |         |         |
| 3433          | BURPSS13_P1319   |                 |         |         |         |         |         |         |         |         |         |         |         |         |         | 2705774 | 2705226 |         |         |
| 3434          | BURPSS13_P1320   |                 |         |         |         |         |         |         |         |         |         |         |         |         |         | 2706268 | 2705771 |         |         |
| 3435          | BURPSS13_P1321   |                 |         |         |         |         |         |         |         |         |         |         |         |         |         | 2706455 | 2706261 |         |         |
| 3436          | BURPSS13_P1322   |                 |         |         |         |         |         |         |         |         |         |         |         |         |         | 2707583 | 2706531 |         |         |
| 3437          | BURPSS13_P1323   |                 |         |         |         |         |         |         |         |         |         |         |         |         |         | 2707808 | 2707593 |         |         |
| 3438          | BURPSS13_P1324   |                 |         |         |         |         |         |         |         |         |         |         |         |         |         | 2708655 | 2707774 |         |         |
| 3439          | BURPSS13_P1325   |                 |         |         |         |         |         |         |         |         |         |         |         |         |         | 2711078 | 2708664 |         |         |
| 3440          | BURPSS13_P1326   |                 |         |         |         |         |         |         |         |         |         |         |         |         |         | 2711212 | 2711096 |         |         |
| 3441          | BURPSS13_P1327   |                 |         |         |         |         |         |         |         |         |         |         |         |         |         | 2711468 | 2711166 |         |         |
| 3442          | BURPSS13_P1328   |                 |         |         |         |         |         |         |         |         |         |         |         |         |         | 2712041 | 2711538 |         |         |
| 3443          | BURPSS13_P1329   |                 |         |         |         |         |         |         |         |         |         |         |         |         |         | 2713221 | 2712052 |         |         |
| 3444          | BURPSS13_P1330   |                 |         |         |         |         |         |         |         |         |         |         |         |         |         | 2713739 | 2713287 |         |         |
| 3445          | BURPSS13_P1331   |                 |         |         |         |         |         |         |         |         |         |         |         |         |         | 2715218 | 2713755 |         |         |
| 3446          | BURPSS13_P1332   |                 |         |         |         |         |         |         |         |         |         |         |         |         |         | 2715781 | 2715206 |         |         |
| 3447          | BURPSS13_P1333   |                 |         |         |         |         |         |         |         |         |         |         |         |         |         | 2716667 | 2715774 |         |         |
| 3448          | BURPSS13_P1334   |                 |         |         |         |         |         |         |         |         |         |         |         |         |         | 2717008 | 2716664 |         |         |
| 3449          | BURPSS13_P1335   |                 |         |         |         |         |         |         |         |         |         |         |         |         |         | 2717211 | 2717005 |         |         |
| 3450          | BURPSS13_P1336   |                 |         |         |         |         |         |         |         |         |         |         |         |         |         | 2717956 | 2717276 |         |         |
| 3451          | BURPSS13_P1337   |                 |         |         |         |         |         |         |         |         |         |         |         |         |         | 2718492 | 2717959 |         |         |
| 3452          | BURPSS13_P1338   |                 |         |         |         |         |         |         |         |         |         |         |         |         |         | 2719012 | 2718485 |         |         |
| 3453          | BURPSS13_P1339   |                 |         |         |         |         |         |         |         |         |         |         |         |         |         | 2719304 | 2719014 |         |         |
| 3454          | BURPSS13_P1340   |                 |         |         |         |         |         |         |         |         |         |         |         |         |         | 2720333 | 2719308 |         |         |
| 3455          | BURPSS13_P1341   |                 |         |         |         |         |         |         |         |         |         |         |         |         |         | 2720712 | 2720368 |         |         |
| 3456          | BURPSS13_P1342   |                 |         |         |         |         |         |         |         |         |         |         |         |         |         | 2721839 | 2720739 |         |         |
| 3457          | BURPSS13_P1343   |                 |         |         |         |         |         |         |         |         |         |         |         |         |         | 2723329 | 2721836 |         |         |
| 3458          | BURPSS13_P1344   |                 |         |         |         |         |         |         |         |         |         |         |         |         |         | 2723532 | 2723326 |         |         |
| 3459          | BURPSS13_P1345   |                 |         |         |         |         |         |         |         |         |         |         |         |         |         | 2725654 | 2723543 |         |         |
| 3460          | BURPSS13_P1346   |                 |         |         |         |         |         |         |         |         |         |         |         |         |         | 2725659 | 2726210 |         |         |
| 3461          | BURPSS13_P1347   |                 |         |         |         |         |         |         |         |         |         |         |         |         |         | 2727784 | 2727197 |         |         |
| 3462          | BURPSS13_P1348   |                 |         |         |         |         |         |         |         |         |         |         |         |         |         | 2730494 | 2728002 |         |         |
| 3463          | BURPSS13_P1349   |                 |         |         |         |         |         |         |         |         |         |         |         |         |         | 2731084 | 2730614 |         |         |
| 3464          | BURPSS13_V0265   |                 |         |         |         |         |         |         |         |         |         |         |         |         |         | 2767260 | 2765959 |         |         |
| 3465          | BURPSS13_V0266   |                 |         |         |         |         |         |         |         |         |         |         |         |         |         | 2765284 | 2765757 |         |         |
| 3466          | BURPSS13_V0267   |                 |         |         |         |         |         |         |         |         |         |         |         |         |         | 2765051 | 2765275 |         |         |
| 3467          | BURPSS13_V0268   |                 |         |         |         |         |         |         |         |         |         |         |         |         |         | 2763516 | 2764832 |         |         |
| 3468          | BURPSS13_V0269   |                 |         |         |         |         |         |         |         |         |         |         |         |         |         | 2763067 | 2763516 |         |         |
| 3469          | BURPSS13_V0270   |                 |         |         |         |         |         |         |         |         |         |         |         |         |         | 2762567 | 2763070 |         |         |
| 3470          | BURPSS13_V0271   |                 |         |         |         |         |         |         |         |         |         |         |         |         |         | 2762133 | 2762468 |         |         |
| 3471          | BURPSS13_V0272   |                 |         |         |         |         |         |         |         |         |         |         |         |         |         | 2761962 | 2762081 |         |         |
| 3472          | BURPSS13_V0273   |                 |         |         |         |         |         |         |         |         |         |         |         |         |         | 2760749 | 2761312 |         |         |
| 3473          | BURPSS13_V0274   |                 |         |         |         |         |         |         |         |         |         |         |         |         |         | 2760373 | 2759846 |         |         |
| 3474          | BURPSS13_V0275   |                 |         |         |         |         |         |         |         |         |         |         |         |         |         | 2759832 | 2759500 |         |         |





[illegible]







|      |                 |  |  |  |  |  |  |  |         |         |  |  |
|------|-----------------|--|--|--|--|--|--|--|---------|---------|--|--|
| 3823 | BURPSPAST_C1334 |  |  |  |  |  |  |  | 2901048 | 2900866 |  |  |
| 3824 | BURPSPAST_C1335 |  |  |  |  |  |  |  | 2901908 | 2901060 |  |  |
| 3825 | BURPSPAST_C1336 |  |  |  |  |  |  |  | 2902101 | 2901901 |  |  |
| 3826 | BURPSPAST_C1337 |  |  |  |  |  |  |  | 2902445 | 2902101 |  |  |
| 3827 | BURPSPAST_C1338 |  |  |  |  |  |  |  | 2903353 | 2902442 |  |  |
| 3828 | BURPSPAST_C1339 |  |  |  |  |  |  |  | 2903653 | 2903357 |  |  |
| 3829 | BURPSPAST_C1340 |  |  |  |  |  |  |  | 2903877 | 2903650 |  |  |
| 3830 | BURPSPAST_C1341 |  |  |  |  |  |  |  | 2904993 | 2904001 |  |  |
| 3831 | BURPSPAST_C1342 |  |  |  |  |  |  |  | 2906547 | 2905087 |  |  |
| 3832 | BURPSPAST_C1343 |  |  |  |  |  |  |  | 2907030 | 2906557 |  |  |
| 3833 | BURPSPAST_C1344 |  |  |  |  |  |  |  | 2907253 | 2907062 |  |  |
| 3834 | BURPSPAST_C1345 |  |  |  |  |  |  |  | 2907568 | 2907263 |  |  |
| 3835 | BURPSPAST_C1346 |  |  |  |  |  |  |  | 2907903 | 2907631 |  |  |
| 3836 | BURPSPAST_C1347 |  |  |  |  |  |  |  | 2908061 | 2907900 |  |  |
| 3837 | BURPSPAST_C1348 |  |  |  |  |  |  |  | 2908311 | 2908087 |  |  |
| 3838 | BURPSPAST_C1349 |  |  |  |  |  |  |  | 2908508 | 2908311 |  |  |
| 3839 | BURPSPAST_C1350 |  |  |  |  |  |  |  | 2908515 | 2908646 |  |  |
| 3840 | BURPSPAST_C1351 |  |  |  |  |  |  |  | 2908831 | 2908709 |  |  |
| 3841 | BURPSPAST_C1352 |  |  |  |  |  |  |  | 2909202 | 2908918 |  |  |
| 3842 | BURPSPAST_C1353 |  |  |  |  |  |  |  | 2909342 | 2909199 |  |  |
| 3843 | BURPSPAST_C1354 |  |  |  |  |  |  |  | 2910704 | 2909367 |  |  |
| 3844 | BURPSPAST_C1355 |  |  |  |  |  |  |  | 2912140 | 2910713 |  |  |
| 3845 | BURPSPAST_C1356 |  |  |  |  |  |  |  | 2912615 | 2912130 |  |  |
| 3846 | BURPSPAST_C1357 |  |  |  |  |  |  |  | 2913323 | 2912658 |  |  |
| 3847 | BURPSPAST_C1358 |  |  |  |  |  |  |  | 2913408 | 2913563 |  |  |
| 3848 | BURPSPAST_C1359 |  |  |  |  |  |  |  | 2913590 | 2913901 |  |  |
| 3849 | BURPSPAST_C1360 |  |  |  |  |  |  |  | 2913931 | 2914086 |  |  |
| 3850 | BURPSPAST_C1361 |  |  |  |  |  |  |  | 2914115 | 2914294 |  |  |
| 3851 | BURPSPAST_C1362 |  |  |  |  |  |  |  | 2914325 | 2914957 |  |  |
| 3852 | BURPSPAST_C1363 |  |  |  |  |  |  |  | 2915005 | 2915271 |  |  |
| 3853 | BURPSPAST_C1364 |  |  |  |  |  |  |  | 2915362 | 2915565 |  |  |
| 3854 | BURPSPAST_C1365 |  |  |  |  |  |  |  | 2915604 | 2915858 |  |  |
| 3855 | BURPSPAST_C1366 |  |  |  |  |  |  |  | 2917090 | 2916362 |  |  |
| 3856 | BURPSPAST_C1367 |  |  |  |  |  |  |  | 2915920 | 2916405 |  |  |
| 3857 | BURPSPAST_C1368 |  |  |  |  |  |  |  | 2917241 | 2917068 |  |  |
| 3858 | BURPSPAST_C1369 |  |  |  |  |  |  |  | 2917333 | 2917587 |  |  |
| 3859 | BURPSPAST_C1370 |  |  |  |  |  |  |  | 2917571 | 2917906 |  |  |
| 3860 | BURPSPAST_C1375 |  |  |  |  |  |  |  | 2919835 | 2919581 |  |  |
| 3861 | BURPSPAST_C1376 |  |  |  |  |  |  |  | 2920241 | 2919786 |  |  |
| 3862 | BURPSPAST_C1377 |  |  |  |  |  |  |  | 2920351 | 2920593 |  |  |
| 3863 | BURPSPAST_C1378 |  |  |  |  |  |  |  | 2920900 | 2921853 |  |  |
| 3864 | BURPSPAST_C1379 |  |  |  |  |  |  |  | 2921846 | 2922511 |  |  |
| 3865 | BURPSPAST_C1380 |  |  |  |  |  |  |  | 2922553 | 2924538 |  |  |
| 3866 | BURPSPAST_C1381 |  |  |  |  |  |  |  | 2924535 | 2925707 |  |  |
| 3867 | BURPSPAST_C1382 |  |  |  |  |  |  |  | 2925988 | 2926146 |  |  |
| 3868 | BURPSPAST_C1383 |  |  |  |  |  |  |  | 2926155 | 2926484 |  |  |
| 3869 | BURPSPAST_C1384 |  |  |  |  |  |  |  | 2926563 | 2926730 |  |  |
| 3870 | BURPSPAST_C1385 |  |  |  |  |  |  |  | 2926717 | 2927067 |  |  |
| 3871 | BURPSPAST_C1386 |  |  |  |  |  |  |  | 2927064 | 2927564 |  |  |
| 3872 | BURPSPAST_C1387 |  |  |  |  |  |  |  | 2927566 | 2927919 |  |  |
| 3873 | BURPSPAST_C1388 |  |  |  |  |  |  |  | 2927921 | 2928121 |  |  |
| 3874 | BURPSPAST_C1389 |  |  |  |  |  |  |  | 2928121 | 2928648 |  |  |
| 3875 | BURPSPAST_C1390 |  |  |  |  |  |  |  | 2928685 | 2928894 |  |  |
| 3876 | BURPSPAST_C1391 |  |  |  |  |  |  |  | 2928891 | 2929526 |  |  |
| 3877 | BURPSPAST_C1392 |  |  |  |  |  |  |  | 2929749 | 2931371 |  |  |
| 3878 | BURPSPAST_C1393 |  |  |  |  |  |  |  | 2931361 | 2931717 |  |  |
| 3879 | BURPSPAST_C1394 |  |  |  |  |  |  |  | 2931729 | 2932016 |  |  |
| 3880 | BURPSPAST_C1395 |  |  |  |  |  |  |  | 2932112 | 2932285 |  |  |



























|      |                  |         |         |                 |
|------|------------------|---------|---------|-----------------|
| 4635 | BURPS1106A_3671  | 3572859 | 3573389 |                 |
| 4636 | BURPS1106A_3672  | 3574186 | 3575289 |                 |
| 4637 | BURPS1106A_3673  | 3575381 | 3577201 |                 |
| 4638 | BURPS1106A_3674  | 3577817 | 3579688 |                 |
| 4639 | BURPS1106A_3675  | 3579691 | 3583689 |                 |
| 4640 | BURPS1106A_3676  | 3583686 | 3585311 |                 |
| 4641 | BURPS1106A_3677  | 3585308 | 3588439 |                 |
| 4642 | BURPS1106A_3678  | 3588455 | 3592840 |                 |
| 4643 | BURPS1106A_3679  | 3593047 | 3593241 |                 |
| 4644 | BURPS1106A_3680  | 3593469 | 3596606 |                 |
| 4645 | BURPS1106A_3681  | 3597115 | 3598149 |                 |
| 4646 | BURPS1106A_3682  | 3598216 | 3598467 |                 |
| 4647 | BURPS1106A_3683  | 3599423 | 3600391 |                 |
| 4648 | BURPS1106A_3684  | 3600561 | 3601463 |                 |
| 4649 | BURPS1106A_3685  | 3601519 | 3601752 |                 |
| 4650 | BURPS1106A_3686  | 3601781 | 3602713 |                 |
| 4651 | BURPS1106A_3687  | 3603971 | 3605074 |                 |
| 4652 | BURPS1106A_3688  | 3605210 | 3605329 |                 |
| 4653 | BURPS1106A_3689  | 3605219 | 3606025 |                 |
| 4654 | BURPS1106A_3690  | 3606153 | 3606452 |                 |
| 4655 | BURPS1106A_3691  | 3606462 | 3606719 |                 |
| 4656 | BURPS1106A_3692  | 3607235 | 3609004 |                 |
| 4657 | BURPS1106A_3693  | 3609075 | 3609731 |                 |
| 4658 | BURPS1106A_3694  | 3610808 | 3611203 |                 |
| 4659 | BURPS1106A_3695  | 3613308 | 3614393 |                 |
| 4660 | BURPS1106A_3696  | 3614512 | 3615657 |                 |
| 4661 | BURPS1106A_3697  | 3615733 | 3617271 |                 |
| 4662 | BURPS1106A_3698  | 3617281 | 3617493 |                 |
| 4663 | BURPS1106A_3699  | 3618449 | 3618799 |                 |
| 4664 | BURPS1106A_3700  | 3618922 | 3620025 |                 |
| 4665 | BURPS1106A_3701  | 3620175 | 3621005 |                 |
| 4666 | BURPS1106B_A2885 |         |         | 2838600 2839130 |
| 4667 | BURPS1106B_A2886 |         |         | 2839717 2841030 |
| 4668 | BURPS1106B_A2887 |         |         | 2842942 2841122 |
| 4669 | BURPS1106B_A2888 |         |         | 2845429 2843558 |
| 4670 | BURPS1106B_A2889 |         |         | 2849430 2845432 |
| 4671 | BURPS1106B_A2890 |         |         | 2851052 2849427 |
| 4672 | BURPS1106B_A2891 |         |         | 2854180 2851049 |
| 4673 | BURPS1106B_A2892 |         |         | 2858581 2854196 |
| 4674 | BURPS1106B_A2893 |         |         | 2858788 2858982 |
| 4675 | BURPS1106B_A2894 |         |         | 2862404 2859210 |
| 4676 | BURPS1106B_A2895 |         |         | 2863905 2862856 |
| 4677 | BURPS1106B_A2896 |         |         | 2864208 2863957 |
| 4678 | BURPS1106B_A2897 |         |         | 2865026 2866132 |
| 4679 | BURPS1106B_A2898 |         |         | 2866122 2867204 |
| 4680 | BURPS1106B_A2899 |         |         | 2867260 2867493 |
| 4681 | BURPS1106B_A2900 |         |         | 2867411 2868454 |
| 4682 | BURPS1106B_A2901 |         |         | 2870815 2869712 |
| 4683 | BURPS1106B_A2902 |         |         | 2871070 2870951 |
| 4684 | BURPS1106B_A2903 |         |         | 2870960 2871766 |
| 4685 | BURPS1106B_A2904 |         |         | 2871894 2872193 |
| 4686 | BURPS1106B_A2905 |         |         | 2872460 2872203 |
| 4687 | BURPS1106B_A2906 |         |         | 2872976 2874745 |
| 4688 | BURPS1106B_A2907 |         |         | 2874816 2875472 |
| 4689 | BURPS1106B_A2908 |         |         | 2876668 2876549 |
| 4690 | BURPS1106B_A2909 |         |         | 2880134 2879049 |
| 4691 | BURPS1106B_A2910 |         |         | 2881398 2880253 |
| 4692 | BURPS1106B_A2911 |         |         | 2883012 2881472 |

|      |                  |         |         |         |         |         |  |         |         |
|------|------------------|---------|---------|---------|---------|---------|--|---------|---------|
| 4693 | BURPS1106B_A2912 | 2883234 | 2883022 |         |         |         |  |         |         |
| 4694 | BURPS1106B_A2913 | 2884540 | 2884190 |         |         |         |  |         |         |
| 4695 | BURPS1106B_A2914 | 2884663 | 2885766 |         |         |         |  |         |         |
| 4696 | BURPS1106B_A2915 | 2886746 | 2885916 |         |         |         |  |         |         |
| 4697 | BURPS1655_E0141  |         |         |         |         |         |  | 3530656 | 3530793 |
| 4698 | BURPS1655_E0144  |         |         |         |         |         |  | 3527262 | 3526603 |
| 4699 | BURPS1710A_4163  |         |         | 3992314 | 3991949 |         |  |         |         |
| 4700 | BURPS1710A_4167  |         |         | 3995119 | 3995643 |         |  |         |         |
| 4701 | BURPS1710A_4168  |         |         | 3996423 | 3997637 |         |  |         |         |
| 4702 | BURPS1710A_4169  |         |         | 3997801 | 3997682 |         |  |         |         |
| 4703 | BURPS1710A_4170  |         |         | 4000684 | 3997949 |         |  |         |         |
| 4704 | BURPS1710A_4171  |         |         | 4002387 | 4000684 |         |  |         |         |
| 4705 | BURPS1710A_4172  |         |         | 4004149 | 4002398 |         |  |         |         |
| 4706 | BURPS1710A_4173  |         |         | 4007037 | 4004149 |         |  |         |         |
| 4707 | BURPS1710A_4174  |         |         | 4007106 | 4007234 |         |  |         |         |
| 4708 | BURPS1710A_4175  |         |         | 4007386 | 4007270 |         |  |         |         |
| 4709 | BURPS1710A_4176  |         |         | 4008361 | 4007585 |         |  |         |         |
| 4710 | BURPS1710A_4177  |         |         | 4009095 | 4008508 |         |  |         |         |
| 4711 | BURPS1710A_4178  |         |         | 4009633 | 4009761 |         |  |         |         |
| 4712 | BURPS1710A_4179  |         |         | 4009988 | 4010215 |         |  |         |         |
| 4713 | BURPS1710A_4180  |         |         | 4010308 | 4011273 |         |  |         |         |
| 4714 | BURPS1710A_4181  |         |         | 4012172 | 4012008 |         |  |         |         |
| 4715 | BURPS1710A_4182  |         |         | 4012376 | 4012239 |         |  |         |         |
| 4716 | BURPS1710A_4183  |         |         | 4012377 | 4013300 |         |  |         |         |
| 4717 | BURPS1710A_4184  |         |         | 4014292 | 4014179 |         |  |         |         |
| 4718 | BURPS1710A_4185  |         |         | 4014645 | 4015451 |         |  |         |         |
| 4719 | BURPS1710A_4186  |         |         | 4016415 | 4016158 |         |  |         |         |
| 4720 | BURPS1710A_4187  |         |         | 4016088 | 4016204 |         |  |         |         |
| 4721 | BURPS1710A_4188  |         |         | 4016482 | 4016835 |         |  |         |         |
| 4722 | BURPS1710A_4189  |         |         | 4017065 | 4018906 |         |  |         |         |
| 4723 | BURPS1710A_4190  |         |         | 4019070 | 4019768 |         |  |         |         |
| 4724 | BURPS1710A_4191  |         |         | 4019974 | 4022790 |         |  |         |         |
| 4725 | BURPS1710A_4192  |         |         | 4023063 | 4023212 |         |  |         |         |
| 4726 | BURPS1710A_4193  |         |         | 4023197 | 4023601 |         |  |         |         |
| 4727 | BURPS1710A_4194  |         |         | 4023601 | 4023783 |         |  |         |         |
| 4728 | BURPS1710A_4195  |         |         | 4026183 | 4024438 |         |  |         |         |
| 4729 | BURPS1710A_4196  |         |         | 4027868 | 4026780 |         |  |         |         |
| 4730 | BURPS1710A_4197  |         |         | 4027947 | 4028063 |         |  |         |         |
| 4731 | BURPS1710A_4198  |         |         | 4028097 | 4028321 |         |  |         |         |
| 4732 | BURPS1710A_4199  |         |         | 4030120 | 4028564 |         |  |         |         |
| 4733 | BURPS1710A_4200  |         |         | 4030785 | 4030120 |         |  |         |         |
| 4734 | BURPS1710A_4201  |         |         | 4032857 | 4031460 |         |  |         |         |
| 4735 | BURPS1710A_4202  |         |         | 4034183 | 4032966 |         |  |         |         |
| 4736 | BURPS1710b_3654  |         |         |         | 3980318 | 3981532 |  |         |         |
| 4737 | BURPS1710b_3655  |         |         |         | 3981844 | 3984579 |  |         |         |
| 4738 | BURPS1710b_3656  |         |         |         | 3984579 | 3986282 |  |         |         |
| 4739 | BURPS1710b_3657  |         |         |         | 3986293 | 3988044 |  |         |         |
| 4740 | BURPS1710b_3658  |         |         |         | 3988044 | 3990926 |  |         |         |
| 4741 | BURPS1710b_3659  |         |         |         | 3994203 | 3995168 |  |         |         |
| 4742 | BURPS1710b_3660  |         |         |         | 3995903 | 3996067 |  |         |         |
| 4743 | BURPS1710b_3661  |         |         |         | 3998540 | 3999346 |  |         |         |
| 4744 | BURPS1710b_3662  |         |         |         | 4000822 | 4002801 |  |         |         |
| 4745 | BURPS1710b_3663  |         |         |         | 4002848 | 4003663 |  |         |         |
| 4746 | BURPS1710b_3664  |         |         |         | 4003887 | 4006685 |  |         |         |
| 4747 | BURPS1710b_3665  |         |         |         | 4008333 | 4010123 |  |         |         |
| 4748 | BURPS1710b_3666  |         |         |         | 4010675 | 4011916 |  |         |         |
| 4749 | BURPS1710b_3667  |         |         |         | 4012459 | 4014015 |  |         |         |
| 4750 | BURPS1710b_3668  |         |         |         | 4014015 | 4015226 |  |         |         |

[illegible]





[illegible]



|               |                  |         |         |         |         |        |        |        |        |         |         |         |         |         |         |         |         |         |         |
|---------------|------------------|---------|---------|---------|---------|--------|--------|--------|--------|---------|---------|---------|---------|---------|---------|---------|---------|---------|---------|
| 5041 BPSL3326 |                  | 3864238 | 3865299 | 3125251 | 3126312 | 121065 | 122126 | 100256 | 101317 | 3835010 | 3836071 | 3779771 | 3780832 | 3850342 | 3851403 | 3970421 | 3971482 | 3734012 | 3735073 |
| 5042 BPSL3327 |                  | 3865299 | 3866060 | 3126312 | 3127073 | 122126 | 122887 | 101317 | 102078 | 3836071 | 3836832 | 3780832 | 3781593 | 3851403 | 3852164 | 3971482 | 3972243 | 3735073 | 3735834 |
| 5043 BPSL3328 |                  | 3866063 | 3866692 | 3127076 | 3127705 | 122890 | 123519 | 102081 | 102710 | 3836835 | 3837464 | 3781596 | 3782225 | 3852167 | 3852796 | 3972246 | 3972875 | 3735837 | 3736466 |
| 5044 BPSL3329 |                  | 3866697 | 3867758 | 3127710 | 3128771 | 123524 | 124585 | 102715 | 103776 | 3837469 | 3838530 | 3782230 | 3783291 | 3852801 | 3853862 | 3972880 | 3973941 | 3736471 | 3737532 |
| 5045 BPSL3330 |                  | 3868578 | 3867844 | 3129591 | 3128857 | 125405 | 124671 | 104596 | 103862 | 3839350 | 3838616 | 3784111 | 3783377 | 3854682 | 3853948 | 3974761 | 3974027 | 3738352 | 3737618 |
| 5046 BPSL3331 |                  | 3869301 | 3868906 | 3130314 | 3129919 | 126131 | 125733 | 105322 | 104924 | 3840073 | 3839678 | 3784834 | 3784439 | 3855408 | 3855010 | 3975484 | 3975089 | 3739078 | 3738680 |
| 5047 BPSL3332 |                  | 3869861 | 3870481 | 3130874 | 3131494 | 126698 | 127318 | 105889 | 106509 | 3840633 | 3841253 | 3785394 | 3786014 | 3855975 | 3856595 | 3976053 | 3976673 | 3739644 | 3740264 |
| 5048 BPSL3333 |                  | 3872518 | 3870788 | 3133531 | 3131801 | 129355 | 127625 | 108546 | 106816 | 3843290 | 3841560 | 3788051 | 3786321 | 3858632 | 3856902 | 3978710 | 3976980 | 3742301 | 3740571 |
| 5049          | BURPS1655_F0088  |         |         |         |         |        |        |        |        |         |         |         |         |         |         |         |         | 3742760 | 3742517 |
| 5050 BPSL3334 |                  | 3873664 | 3872981 | 3134677 | 3133994 | 130514 | 129831 | 109705 | 109022 | 3844436 | 3843753 | 3789205 | 3788522 | 3859778 | 3859095 | 3979869 | 3979186 | 3743455 | 3742772 |
| 5051 BPSL3335 |                  | 3874089 | 3873664 | 3135102 | 3134677 | 130939 | 130514 | 110130 | 109705 | 3844861 | 3844436 | 3789624 | 3789208 | 3860203 | 3859778 | 3980294 | 3979869 | 3743886 | 3743464 |
| 5052 BPSL3336 |                  | 3874826 | 3874152 | 3135839 | 3135165 | 131676 | 131002 | 110867 | 110193 | 3845598 | 3844924 | 3790361 | 3789687 | 3860940 | 3860266 | 3981031 | 3980357 | 3744623 | 3743949 |
| 5053 BPSL3337 |                  | 3875859 | 3876677 | 3136872 | 3137672 | 132713 | 133531 | 111904 | 112722 | 3846635 | 3847453 | 3791397 | 3792215 | 3861977 | 3862795 | 3982068 | 3982886 | 3745660 | 3746478 |
| 5054 BPSL3338 |                  | 3878550 | 3876736 | 3139564 | 3137750 | 135404 | 133590 | 114595 | 112781 | 3849326 | 3847512 | 3794088 | 3792274 | 3864668 | 3862854 | 3984759 | 3982945 | 3748351 | 3746537 |
| 5055          | BURPSS13_F0204   |         |         |         |         |        |        |        |        |         |         |         |         |         |         | 3986639 | 3986863 |         |         |
| 5056 BPSL3339 |                  | 3880480 | 3878822 | 3141494 | 3139836 | 137334 | 135676 | 116525 | 114867 | 3851309 | 3849651 | 3796018 | 3794360 | 3866598 | 3864940 | 3986689 | 3985031 | 3750281 | 3748623 |
| 5057 BPSL3340 |                  | 3881370 | 3880672 | 3142384 | 3141686 | 138218 | 137520 | 117409 | 116711 | 3852199 | 3851501 | 3796908 | 3796210 | 3867487 | 3866789 | 3987574 | 3986876 | 3751165 | 3750467 |
| 5058 BPSL3341 |                  | 3882068 | 3881829 | 3143082 | 3142843 | 138917 | 138678 | 118108 | 117869 | 3852898 | 3852659 | 3797608 | 3797369 | 3868183 | 3867947 | 3988273 | 3988034 | 3751933 | 3751619 |
| 5059          | BURPS1106A_3981  | 3882213 | 3882461 |         |         |        |        |        |        |         |         |         |         |         |         |         |         |         |         |
| 5060          | BURPS1106A_3982  | 3882618 | 3883697 |         |         |        |        |        |        |         |         |         |         |         |         |         |         |         |         |
| 5061          | BURPS1106A_3983  | 3884286 | 3884402 |         |         |        |        |        |        |         |         |         |         |         |         |         |         |         |         |
| 5062          | BURPS1106A_3984  | 3884750 | 3885853 |         |         |        |        |        |        |         |         |         |         |         |         |         |         |         |         |
| 5063          | BURPS1106A_3985  | 3886560 | 3887168 |         |         |        |        |        |        |         |         |         |         |         |         |         |         |         |         |
| 5064          | BURPS1106A_3987  | 3888582 | 3888713 |         |         |        |        |        |        |         |         |         |         |         |         |         |         |         |         |
| 5065          | BURPS1106B_A3183 |         |         | 3143475 | 3143227 |        |        |        |        |         |         |         |         |         |         |         |         |         |         |
| 5066          | BURPS1106B_A3184 |         |         | 3144711 | 3143632 |        |        |        |        |         |         |         |         |         |         |         |         |         |         |
| 5067          | BURPS1106B_A3185 |         |         | 3145300 | 3145416 |        |        |        |        |         |         |         |         |         |         |         |         |         |         |
| 5068          | BURPS1106B_A3186 |         |         | 3145764 | 3146867 |        |        |        |        |         |         |         |         |         |         |         |         |         |         |
| 5069          | BURPS1106B_A3187 |         |         | 3148182 | 3147574 |        |        |        |        |         |         |         |         |         |         |         |         |         |         |
| 5070          | BURPS1106B_A3189 |         |         | 3149596 | 3149727 |        |        |        |        |         |         |         |         |         |         |         |         |         |         |
| 5071          | BURPS1655_F0102  |         |         |         |         |        |        |        |        |         |         |         |         |         |         |         |         | 3754148 | 3754351 |
| 5072          | BURPS1655_F0103  |         |         |         |         |        |        |        |        |         |         |         |         |         |         |         |         | 3755232 | 3754960 |
| 5073          | BURPS1655_F0104  |         |         |         |         |        |        |        |        |         |         |         |         |         |         |         |         | 3755464 | 3755192 |
| 5074          | BURPS1710A_0158  |         |         |         |         | 139310 | 139062 |        |        |         |         |         |         |         |         |         |         |         |         |
| 5075          | BURPS1710A_0159  |         |         |         |         | 140546 | 139467 |        |        |         |         |         |         |         |         |         |         |         |         |
| 5076          | BURPS1710A_0160  |         |         |         |         | 141259 | 140546 |        |        |         |         |         |         |         |         |         |         |         |         |
| 5077          | BURPS1710A_0161  |         |         |         |         | 142969 | 142052 |        |        |         |         |         |         |         |         |         |         |         |         |
| 5078          | BURPS1710A_0162  |         |         |         |         | 144409 | 143666 |        |        |         |         |         |         |         |         |         |         |         |         |
| 5079          | BURPS1710b_0115  |         |         |         |         |        |        | 118253 | 118501 |         |         |         |         |         |         |         |         |         |         |
| 5080          | BURPS1710b_0116  |         |         |         |         |        |        | 118658 | 119878 |         |         |         |         |         |         |         |         |         |         |
| 5081          | BURPS406E_A1033  |         |         |         |         |        |        |        |        | 3856641 | 3856033 |         |         |         |         |         |         |         |         |
| 5082          | BURPS406E_A1034  |         |         |         |         |        |        |        |        | 3854668 | 3853448 |         |         |         |         |         |         |         |         |
| 5083          | BURPS406E_A1035  |         |         |         |         |        |        |        |        | 3853291 | 3853043 |         |         |         |         |         |         |         |         |
| 5084          | BURPS668_3899    |         |         |         |         |        |        |        |        |         |         | 3797729 | 3798001 |         |         |         |         |         |         |
| 5085          | BURPS668_3900    |         |         |         |         |        |        |        |        |         |         | 3798158 | 3799237 |         |         |         |         |         |         |
| 5086          | BURPS668_3901    |         |         |         |         |        |        |        |        |         |         | 3799826 | 3799942 |         |         |         |         |         |         |
| 5087          | BURPS668_3902    |         |         |         |         |        |        |        |        |         |         | 3800744 | 3801694 |         |         |         |         |         |         |
| 5088          | BURPS668_3904    |         |         |         |         |        |        |        |        |         |         | 3802555 | 3802923 |         |         |         |         |         |         |
| 5089          | BURPS668_3905    |         |         |         |         |        |        |        |        |         |         | 3803199 | 3803399 |         |         |         |         |         |         |
| 5090          | BURPS668_3906    |         |         |         |         |        |        |        |        |         |         | 3803668 | 3804816 |         |         |         |         |         |         |
| 5091          | BURPSAST_Y0099   |         |         |         |         |        |        |        |        |         |         |         |         | 3868578 | 3868330 |         |         |         |         |
| 5092          | BURPSAST_Y0100   |         |         |         |         |        |        |        |        |         |         |         |         | 3869814 | 3868735 |         |         |         |         |
| 5093          | BURPSAST_Y0101   |         |         |         |         |        |        |        |        |         |         |         |         | 3871171 | 3870524 |         |         |         |         |
| 5094          | BURPSAST_Y0102   |         |         |         |         |        |        |        |        |         |         |         |         | 3872237 | 3871320 |         |         |         |         |
| 5095          | BURPSAST_Y0104   |         |         |         |         |        |        |        |        |         |         |         |         | 3873342 | 3873473 |         |         |         |         |
| 5096          | BURPSAST_Y0105   |         |         |         |         |        |        |        |        |         |         |         |         | 3873997 | 3874428 |         |         |         |         |
| 5097          | BURPSAST_Y0106   |         |         |         |         |        |        |        |        |         |         |         |         | 3874533 | 3875672 |         |         |         |         |
| 5098          | BURPSAST_Y0107   |         |         |         |         |        |        |        |        |         |         |         |         | 3877031 | 3878557 |         |         |         |         |

|      |                 |      |         |         |         |         |        |        |        |        |         |         |         |         |         |         |         |         |         |         |
|------|-----------------|------|---------|---------|---------|---------|--------|--------|--------|--------|---------|---------|---------|---------|---------|---------|---------|---------|---------|---------|
| 5099 | BURPSPAST_Y0108 |      |         |         |         |         |        |        |        |        |         |         | 3878976 | 3879500 |         |         |         |         |         |         |
| 5100 | BURPSPAST_Y0109 |      |         |         |         |         |        |        |        |        |         |         | 3879497 | 3880258 |         |         |         |         |         |         |
| 5101 | BURPSPAST_Y0110 |      |         |         |         |         |        |        |        |        |         |         | 3880271 | 3881488 |         |         |         |         |         |         |
| 5102 | BURPSPAST_Y0111 |      |         |         |         |         |        |        |        |        |         |         | 3884542 | 3881966 |         |         |         |         |         |         |
| 5103 | BURPSPAST_Y0112 |      |         |         |         |         |        |        |        |        |         |         | 3886123 | 3884552 |         |         |         |         |         |         |
| 5104 | BURPSPAST_Y0113 |      |         |         |         |         |        |        |        |        |         |         | 3887325 | 3886123 |         |         |         |         |         |         |
| 5105 | BURPSPAST_Y0114 |      |         |         |         |         |        |        |        |        |         |         | 3892685 | 3887322 |         |         |         |         |         |         |
| 5106 | BURPSPAST_Y0115 |      |         |         |         |         |        |        |        |        |         |         | 3894507 | 3894674 |         |         |         |         |         |         |
| 5107 | BURPSPAST_Y0116 |      |         |         |         |         |        |        |        |        |         |         | 3894946 | 3895128 |         |         |         |         |         |         |
| 5108 | BURPSPAST_Y0117 |      |         |         |         |         |        |        |        |        |         |         | 3895223 | 3896188 |         |         |         |         |         |         |
| 5109 | BURPSPAST_Y0118 |      |         |         |         |         |        |        |        |        |         |         | 3896262 | 3897257 |         |         |         |         |         |         |
| 5110 | BURPSPAST_Y0119 |      |         |         |         |         |        |        |        |        |         |         | 3897292 | 3898224 |         |         |         |         |         |         |
| 5111 | BURPSPAST_Y0120 |      |         |         |         |         |        |        |        |        |         |         | 3899572 | 3900378 |         |         |         |         |         |         |
| 5112 | BURPSPAST_Y0121 |      |         |         |         |         |        |        |        |        |         |         | 3900476 | 3900670 |         |         |         |         |         |         |
| 5113 | BURPSPAST_Y0122 |      |         |         |         |         |        |        |        |        |         |         | 3901341 | 3901084 |         |         |         |         |         |         |
| 5114 | BURPSPAST_Y0123 |      |         |         |         |         |        |        |        |        |         |         | 3901519 | 3901761 |         |         |         |         |         |         |
| 5115 | BURPSPAST_Y0124 |      |         |         |         |         |        |        |        |        |         |         | 3902223 | 3903833 |         |         |         |         |         |         |
| 5116 | BURPSPAST_Y0125 |      |         |         |         |         |        |        |        |        |         |         | 3903979 | 3904692 |         |         |         |         |         |         |
| 5117 | BURPSPAST_Y0126 |      |         |         |         |         |        |        |        |        |         |         | 3904912 | 3905376 |         |         |         |         |         |         |
| 5118 | BURPSPAST_Y0127 |      |         |         |         |         |        |        |        |        |         |         | 3907972 | 3909252 |         |         |         |         |         |         |
| 5119 | BURPSPAST_Y0128 |      |         |         |         |         |        |        |        |        |         |         | 3910663 | 3909365 |         |         |         |         |         |         |
| 5120 | BURPSPAST_Y0129 |      |         |         |         |         |        |        |        |        |         |         | 3910832 | 3910668 |         |         |         |         |         |         |
| 5121 | BURPSPAST_Y0130 |      |         |         |         |         |        |        |        |        |         |         | 3911077 | 3911442 |         |         |         |         |         |         |
| 5122 | BURPSPAST_Y0131 |      |         |         |         |         |        |        |        |        |         |         | 3912773 | 3911502 |         |         |         |         |         |         |
| 5123 | BURPSPAST_Y0132 |      |         |         |         |         |        |        |        |        |         |         | 3914464 | 3912854 |         |         |         |         |         |         |
| 5124 | BURPSPAST_Y0133 |      |         |         |         |         |        |        |        |        |         |         | 3914850 | 3914500 |         |         |         |         |         |         |
| 5125 | BURPSPAST_Y0134 |      |         |         |         |         |        |        |        |        |         |         | 3915427 | 3914861 |         |         |         |         |         |         |
| 5126 | BURPSPAST_Y0135 |      |         |         |         |         |        |        |        |        |         |         | 3916459 | 3915512 |         |         |         |         |         |         |
| 5127 | BURPSS13_F0198  |      |         |         |         |         |        |        |        |        |         |         |         |         | 3993765 | 3993022 |         |         |         |         |
| 5128 | BURPSS13_F0199  |      |         |         |         |         |        |        |        |        |         |         |         |         | 3992016 | 3991408 |         |         |         |         |
| 5129 | BURPSS13_F0200  |      |         |         |         |         |        |        |        |        |         |         |         |         | 3990043 | 3988823 |         |         |         |         |
| 5130 | BURPSS13_F0201  |      |         |         |         |         |        |        |        |        |         |         |         |         | 3988666 | 3988418 |         |         |         |         |
| 5131 | BPSL3342        | GI12 |         |         |         |         |        |        |        |        |         |         |         |         |         |         |         |         |         |         |
| 5132 | BPSL3343        | GI12 |         |         |         |         |        |        |        |        |         |         |         |         |         |         |         |         |         |         |
| 5133 | BPSL3344        | GI12 |         |         |         |         |        |        |        |        |         |         |         |         |         |         |         |         |         |         |
| 5134 | BPSL3345        | GI12 |         |         |         |         |        |        |        |        |         | 3806606 | 3805833 |         |         |         |         |         |         |         |
| 5135 | BURPS668_3908   |      |         |         |         |         |        |        |        |        |         | 3807378 | 3808724 |         |         |         |         |         |         |         |
| 5136 | BURPS668_3909   |      |         |         |         |         |        |        |        |        |         | 3808721 | 3809647 |         |         |         |         |         |         |         |
| 5137 | BURPS668_3911   |      |         |         |         |         |        |        |        |        |         | 3809922 | 3811898 |         |         |         |         |         |         |         |
| 5138 | BURPS668_3912   |      |         |         |         |         |        |        |        |        |         | 3811906 | 3812217 |         |         |         |         |         |         |         |
| 5139 | BURPS668_3913   |      |         |         |         |         |        |        |        |        |         | 3812296 | 3812505 |         |         |         |         |         |         |         |
| 5140 | BPSL3346        | GI12 |         |         |         |         |        |        |        |        |         |         |         |         |         |         |         |         |         |         |
| 5141 | BPSL3347        | GI12 |         |         |         |         |        |        |        |        |         |         |         |         |         |         |         |         |         |         |
| 5142 | BPSL3348        | GI12 |         |         |         |         |        |        |        |        |         |         |         |         |         |         |         |         |         |         |
| 5143 | BPSL3349        | GI12 |         |         |         |         |        |        |        |        |         |         |         |         |         |         |         |         |         |         |
| 5144 | BPSL3350        | GI12 |         |         |         |         |        |        |        |        |         |         |         |         |         |         |         |         |         |         |
| 5145 | BPSL3351        | GI12 |         |         |         |         |        |        |        |        |         |         |         |         |         |         |         |         |         |         |
| 5146 | BPSL3352        | GI12 |         |         |         |         |        |        |        |        |         | 3812890 | 3812603 |         |         |         |         |         |         |         |
| 5147 | BURPS668_3915   |      |         |         |         |         |        |        |        |        |         | 3813495 | 3813710 |         |         |         |         |         |         |         |
| 5148 | BPSL3353        | GI12 |         |         |         |         |        |        |        |        |         |         |         |         |         |         |         |         |         |         |
| 5149 | BPSL3354        |      | 3889944 | 3890840 | 3150958 | 3151854 | 145435 | 146331 | 124626 | 125522 | 3859417 | 3860313 | 3814542 | 3815438 | 3917043 | 3917939 | 3994792 | 3995688 | 3789682 | 3790578 |
| 5150 | BURPS1106A_3989 |      | 3890827 | 3890943 |         |         |        |        |        |        |         |         |         |         |         |         |         |         |         |         |
| 5151 | BPSL3355        |      | 3893253 | 3891169 | 3154267 | 3152183 | 148741 | 146657 | 127932 | 125848 | 3862726 | 3860642 | 3817841 | 3815757 | 3920352 | 3918268 | 3998101 | 3996017 | 3792991 | 3790907 |
| 5152 | BPSL3356        |      | 3893503 | 3894342 | 3154517 | 3155356 | 148991 | 149830 | 128182 | 129021 | 3862976 | 3863815 | 3818091 | 3818930 | 3920602 | 3921441 | 3998351 | 3999190 | 3793241 | 3794080 |
| 5153 | BPSL3357        |      | 3894342 | 3895142 | 3155356 | 3156156 | 149830 | 150630 | 129021 | 129821 | 3863815 | 3864615 | 3818930 | 3819730 | 3921441 | 3922241 | 3999190 | 3999990 | 3794080 | 3794880 |
| 5154 | BPSL3358        |      | 3895616 | 3896716 | 3156630 | 3157730 | 151104 | 152204 | 130295 | 131395 | 3865089 | 3866189 | 3820196 | 3821296 | 3922715 | 3923815 | 4000464 | 4001564 | 3795346 | 3796446 |
| 5155 | BPSL3359        |      | 3896891 | 3897247 | 3157905 | 3158261 | 152379 | 152735 | 131570 | 131926 | 3866364 | 3866720 | 3821471 | 3821827 | 3923990 | 3924346 | 4001739 | 4002095 | 3796621 | 3796977 |
| 5156 | BPSL3360        |      | 3898169 | 3899284 | 3159092 | 3160207 | 153608 | 154723 | 132806 | 133921 | 3867502 | 3868617 | 3822875 | 3823990 | 3925135 | 3926250 | 4002905 | 4004020 | 3797745 | 3798860 |





|     |                  |  |       |       |         |         |         |         |         |         |       |       |       |       |       |       |       |       |       |       |
|-----|------------------|--|-------|-------|---------|---------|---------|---------|---------|---------|-------|-------|-------|-------|-------|-------|-------|-------|-------|-------|
| 44  | BPSS0029         |  | 29225 | 28608 | 1933339 | 1933956 | 2354383 | 2353766 | 1868260 | 1867643 | 39199 | 38582 | 42994 | 42377 | 40891 | 40274 | 37697 | 37080 | 37220 | 36603 |
| 45  | BPSS0030         |  | 29333 | 30223 | 1933231 | 1932341 | 2354491 | 2355381 | 1868368 | 1869258 | 39307 | 40197 | 43102 | 43992 | 40999 | 41889 | 37805 | 38695 | 37328 | 38218 |
| 46  | BPSS0031         |  | 31048 | 30296 | 1931516 | 1932268 | 2356214 | 2355462 | 1870091 | 1869339 | 41040 | 40288 | 44842 | 44090 | 42732 | 41980 | 39518 | 38766 | 39032 | 38280 |
| 47  | BPSS0032         |  | 31665 | 31201 | 1930899 | 1931363 | 2356831 | 2356367 | 1870708 | 1870244 | 41657 | 41193 | 45459 | 44995 | 43349 | 42885 | 40135 | 39671 | 39649 | 39185 |
| 48  | BPSS0033         |  | 32053 | 32316 | 1930511 | 1930248 | 2357215 | 2357478 | 1871092 | 1871355 | 42045 | 42308 | 45847 | 46110 | 43733 | 43996 | 40523 | 40786 | 40037 | 40300 |
| 49  | BPSS0034         |  | 33094 | 34671 | 1929470 | 1927893 | 2358256 | 2359833 | 1872133 | 1873710 | 43087 | 44664 | 46891 | 48468 | 44775 | 46352 | 41574 | 43151 | 41079 | 42656 |
| 50  | BPSS0035         |  | 34671 | 35618 | 1927893 | 1926946 | 2359833 | 2360780 | 1873710 | 1874657 | 44664 | 45611 | 48468 | 49415 | 46352 | 47299 | 43151 | 44098 | 42656 | 43603 |
| 51  | BURPS1710b_A1545 |  |       |       |         |         |         |         | 1875153 | 1875353 |       |       |       |       |       |       |       |       |       |       |
| 52  | BURPS668_A0059   |  |       |       |         |         |         |         |         |         |       |       | 49475 | 50236 |       |       |       |       |       |       |
| 53  | BURPSPAST_X0058  |  |       |       |         |         |         |         |         |         |       |       |       |       | 47999 | 47787 |       |       |       |       |
| 54  | BPSS0036         |  | 36806 | 36393 | 1925758 | 1926171 | 2361932 | 2361519 | 1875809 | 1875396 | 46743 | 46330 | 50704 | 50291 | 48455 | 48042 | 45227 | 44814 | 44780 | 44367 |
| 55  | BPSS0037         |  | 37061 | 37306 | 1925503 | 1925258 | 2362187 | 2362432 | 1876064 | 1876309 | 46999 | 47244 | 50960 | 51205 | 48710 | 48955 | 45483 | 45683 | 45036 | 45281 |
| 56  | BPSS0038         |  | 37433 | 38353 | 1925131 | 1924211 | 2362559 | 2363479 | 1876436 | 1877356 | 47370 | 48290 | 51332 | 52252 | 49082 | 50002 | 45788 | 46453 | 45408 | 46328 |
| 57  | BURPSS13_B0037   |  |       |       |         |         |         |         |         |         |       |       |       |       |       |       | 46477 | 46788 |       |       |
| 58  | BPSS0039         |  | 39391 | 38591 | 1923153 | 1923953 | 2364607 | 2363807 | 1878449 | 1877649 | 49320 | 48520 | 53359 | 52559 | 51067 | 50267 | 47546 | 46746 | 47365 | 46565 |
| 59  | BPSS0040         |  | 39946 | 39395 | 1922598 | 1923149 | 2365162 | 2364611 | 1879004 | 1878453 | 49875 | 49324 | 53914 | 53363 | 51622 | 51071 | 48101 | 47550 | 47920 | 47369 |
| 60  | BPSS0041         |  | 41184 | 40261 | 1921360 | 1922283 | 2366400 | 2365477 | 1880242 | 1879319 | 51113 | 50190 | 55152 | 54229 | 52860 | 51937 | 49339 | 48416 | 49158 | 48235 |
| 61  | BPSS0042         |  | 41298 | 42518 | 1921246 | 1920026 | 2366514 | 2367734 | 1880356 | 1881576 | 51227 | 52447 | 55266 | 56486 | 52974 | 54194 | 49453 | 50673 | 49272 | 50492 |
| 62  | BPSS0043         |  | 42729 | 43439 | 1919815 | 1919105 | 2367945 | 2368655 | 1881787 | 1882497 | 52658 | 53368 | 56697 | 57407 | 54405 | 55115 | 50884 | 51594 | 50703 | 51413 |
| 63  | BPSS0044         |  | 43461 | 44114 | 1919083 | 1918430 | 2368677 | 2369330 | 1882519 | 1883172 | 53390 | 54043 | 57429 | 58082 | 55137 | 55790 | 51616 | 52269 | 51435 | 52088 |
| 64  | BPSS0045         |  | 44214 | 45608 | 1918330 | 1916936 | 2369430 | 2370824 | 1883272 | 1884666 | 54143 | 55537 | 58182 | 59576 | 55890 | 57284 | 52369 | 53763 | 52188 | 53582 |
| 65  | BPSS0046         |  | 45624 | 46406 | 1916920 | 1916138 | 2370840 | 2371622 | 1884682 | 1885464 | 55553 | 56335 | 59592 | 60374 | 57300 | 58082 | 53779 | 54561 | 53598 | 54380 |
| 66  | BPSS0047         |  | 46425 | 46808 | 1916119 | 1915736 | 2371641 | 2372024 | 1885483 | 1885866 | 56354 | 56737 | 60393 | 60776 | 58101 | 58484 | 54580 | 54963 | 54399 | 54782 |
| 67  | BPSS0048         |  | 46990 | 48342 | 1915554 | 1914202 | 2372206 | 2373558 | 1886048 | 1887400 | 56908 | 58260 | 60947 | 62299 | 58666 | 60018 | 55145 | 56497 | 54964 | 56316 |
| 68  | BPSS0049         |  | 48661 | 48416 | 1913883 | 1914128 | 2373877 | 2373632 | 1887719 | 1887474 | 58579 | 58334 | 62618 | 62373 | 60337 | 60092 | 56816 | 56571 | 56635 | 56390 |
| 69  | BURPS1710b_A1559 |  |       |       |         |         |         |         | 1887820 | 1889742 |       |       |       |       |       |       |       |       |       |       |
| 70  | BPSS0050         |  | 49379 | 48765 | 1913165 | 1913779 | 2374595 | 2373981 | 1888437 | 1887823 | 59297 | 58683 | 63336 | 62722 | 61055 | 60441 | 57534 | 56920 | 57353 | 56739 |
| 71  | BURPS1106A_A0063 |  | 50726 | 51649 |         |         |         |         |         |         |       |       |       |       |       |       |       |       |       |       |
| 72  | BURPS1655_B0039  |  |       |       |         |         |         |         |         |         |       |       |       |       |       |       |       |       | 59624 | 58701 |
| 73  | BURPS1655_B0040  |  |       |       |         |         |         |         |         |         |       |       |       |       |       |       |       |       | 58643 | 57606 |
| 74  | BURPS1710A_A2547 |  |       |       |         |         | 2375884 | 2374847 |         |         |       |       |       |       |       |       |       |       |       |       |
| 75  | BURPS1710A_A2548 |  |       |       |         |         | 2376865 | 2375942 |         |         |       |       |       |       |       |       |       |       |       |       |
| 76  | BURPS1710b_A1560 |  |       |       |         |         |         |         | 1889784 | 1890707 |       |       |       |       |       |       |       |       |       |       |
| 77  | BURPS406E_Q0081  |  |       |       |         |         |         |         |         |         | 60587 | 59550 |       |       |       |       |       |       |       |       |
| 78  | BURPS406E_Q0082  |  |       |       |         |         |         |         |         |         | 61568 | 60645 |       |       |       |       |       |       |       |       |
| 79  | BURPS668_A0075   |  |       |       |         |         |         |         |         |         |       |       | 64096 | 64212 |       |       |       |       |       |       |
| 80  | BURPS668_A0076   |  |       |       |         |         |         |         |         |         |       |       | 64368 | 65393 |       |       |       |       |       |       |
| 81  | BURPS668_A0078   |  |       |       |         |         |         |         |         |         |       |       | 66266 | 66745 |       |       |       |       |       |       |
| 82  | BURPS668_A0079   |  |       |       |         |         |         |         |         |         |       |       | 66772 | 67809 |       |       |       |       |       |       |
| 83  | BURPS668_A0080   |  |       |       |         |         |         |         |         |         |       |       | 67867 | 68790 |       |       |       |       |       |       |
| 84  | BURPSPAST_X0040  |  |       |       |         |         |         |         |         |         |       |       |       |       | 63325 | 62402 |       |       |       |       |
| 85  | BURPSPAST_X0041  |  |       |       |         |         |         |         |         |         |       |       |       |       | 62344 | 61307 |       |       |       |       |
| 86  | BURPSS13_B0019   |  |       |       |         |         |         |         |         |         |       |       |       |       |       |       | 64549 | 63626 |       |       |
| 87  | BURPSS13_B0020   |  |       |       |         |         |         |         |         |         |       |       |       |       |       |       | 63568 | 62531 |       |       |
| 88  | BURPSS13_B0022   |  |       |       |         |         |         |         |         |         |       |       |       |       |       |       | 62492 | 62280 |       |       |
| 89  | BURPSS13_B0023   |  |       |       |         |         |         |         |         |         |       |       |       |       |       |       | 61940 | 61821 |       |       |
| 90  | BURPSS13_B0024   |  |       |       |         |         |         |         |         |         |       |       |       |       |       |       | 61435 | 58817 |       |       |
| 91  | BURPSS13_B0025   |  |       |       |         |         |         |         |         |         |       |       |       |       |       |       | 58820 | 58023 |       |       |
| 92  | BPSS0051         |  | 53021 | 51768 | 1909523 | 1910776 | 2378237 | 2376984 | 1892079 | 1890826 | 62940 | 61687 | 70162 | 68909 | 64697 | 63444 | 65921 | 64668 | 60996 | 59743 |
| 93  | BURPS1106B_1928  |  |       |       | 1910895 | 1911818 |         |         |         |         |       |       |       |       |       |       |       |       |       |       |
| 94  | BPSS0052         |  | 53436 | 53011 | 1909108 | 1909533 | 2378652 | 2378227 | 1892494 | 1892069 | 63355 | 62930 | 70577 | 70152 | 65112 | 64687 | 66336 | 65911 | 61411 | 60986 |
| 95  | BPSS0053         |  | 55028 | 53841 | 1907516 | 1908703 | 2380244 | 2379057 | 1894086 | 1892899 | 64947 | 63760 | 72169 | 70982 | 66704 | 65517 | 67928 | 66741 | 63003 | 61816 |
| 96  | BPSS0054         |  | 56020 | 55028 | 1906524 | 1907516 | 2381236 | 2380244 | 1895078 | 1894086 | 65939 | 64947 | 73161 | 72169 | 67696 | 66704 | 68920 | 67928 | 63995 | 63003 |
| 97  | BPSS0055         |  | 56938 | 57483 | 1905606 | 1905061 | 2382202 | 2382747 | 1896044 | 1896589 | 66881 | 67426 | 74103 | 74648 | 68650 | 69195 | 69838 | 70383 | 64973 | 65518 |
| 98  | BPSS0056         |  | 57539 | 57835 | 1905005 | 1904709 | 2382803 | 2383102 | 1896645 | 1896944 | 67482 | 67781 | 74704 | 75003 | 69251 | 69550 | 70439 | 70732 | 65574 | 65873 |
| 99  | BPSS0057         |  | 57874 | 58539 | 1904670 | 1904005 | 2383141 | 2383806 | 1896983 | 1897648 | 67820 | 68485 | 75042 | 75707 | 69589 | 70254 | 70774 | 71439 | 65912 | 66577 |
| 100 | BPSS0058         |  | 59019 | 64928 | 1903525 | 1897616 | 2384286 | 2390198 | 1898128 | 1904040 | 68965 | 74877 | 76187 | 82099 | 70736 | 76648 | 71919 | 77828 | 67057 | 72969 |
| 101 | BURPSS13_B0007   |  |       |       |         |         |         |         |         |         |       |       |       |       |       |       | 77927 | 78070 |       |       |

|     |                  |  |       |       |         |         |         |         |         |         |       |       |       |       |        |        |       |       |        |        |
|-----|------------------|--|-------|-------|---------|---------|---------|---------|---------|---------|-------|-------|-------|-------|--------|--------|-------|-------|--------|--------|
| 102 | BPSS0059         |  | 66154 | 65897 | 1896390 | 1896647 | 2391495 | 2391238 | 1905336 | 1905079 | 76173 | 75916 | 83395 | 83138 | 77953  | 77696  | 79045 | 78788 | 74267  | 74010  |
| 103 | BURPS1655_B0003  |  |       |       |         |         |         |         |         |         |       |       |       |       |        |        |       |       | 89107  | 88664  |
| 104 | BURPS1655_B0004  |  |       |       |         |         |         |         |         |         |       |       |       |       |        |        |       |       | 88634  | 88290  |
| 105 | BURPS1655_B0005  |  |       |       |         |         |         |         |         |         |       |       |       |       |        |        |       |       | 79953  | 88280  |
| 106 | BURPS1655_B0006  |  |       |       |         |         |         |         |         |         |       |       |       |       |        |        |       |       | 79936  | 79676  |
| 107 | BURPS1655_B0007  |  |       |       |         |         |         |         |         |         |       |       |       |       |        |        |       |       | 79548  | 79432  |
| 108 | BURPS1655_B0008  |  |       |       |         |         |         |         |         |         |       |       |       |       |        |        |       |       | 79338  | 79183  |
| 109 | BURPS1655_B0009  |  |       |       |         |         |         |         |         |         |       |       |       |       |        |        |       |       | 79178  | 78720  |
| 110 | BURPS1655_B0010  |  |       |       |         |         |         |         |         |         |       |       |       |       |        |        |       |       | 78638  | 78522  |
| 111 | BURPS1655_B0011  |  |       |       |         |         |         |         |         |         |       |       |       |       |        |        |       |       | 78525  | 78358  |
| 112 | BURPS1655_B0012  |  |       |       |         |         |         |         |         |         |       |       |       |       |        |        |       |       | 77523  | 77636  |
| 113 | BURPS1655_B0013  |  |       |       |         |         |         |         |         |         |       |       |       |       |        |        |       |       | 77379  | 77251  |
| 114 | BURPS1655_B0014  |  |       |       |         |         |         |         |         |         |       |       |       |       |        |        |       |       | 77278  | 76895  |
| 115 | BURPS1655_B0015  |  |       |       |         |         |         |         |         |         |       |       |       |       |        |        |       |       | 76914  | 76702  |
| 116 | BURPS1655_B0016  |  |       |       |         |         |         |         |         |         |       |       |       |       |        |        |       |       | 76480  | 76626  |
| 117 | BURPS1655_B0017  |  |       |       |         |         |         |         |         |         |       |       |       |       |        |        |       |       | 76242  | 75913  |
| 118 | BURPS1655_B0018  |  |       |       |         |         |         |         |         |         |       |       |       |       |        |        |       |       | 75559  | 75903  |
| 119 | BURPS1655_B0019  |  |       |       |         |         |         |         |         |         |       |       |       |       |        |        |       |       | 75086  | 75529  |
| 120 | BPSS0060         |  | 66805 | 67074 | 1895739 | 1895470 | 2392154 | 2392423 | 1905995 | 1906264 | 76832 | 77101 | 84054 | 84323 | 78604  | 78873  | 79704 | 79973 | 89194  | 89394  |
| 121 | BPSS0060A        |  | 67264 | 67704 | 1895280 | 1894840 | 2392613 | 2392744 | 1906454 | 1906894 | 77291 | 77521 | 84513 | 84953 | 79063  | 79503  | 80163 | 80498 |        |        |
| 122 | BPSS0061         |  | 68210 | 69559 | 1894334 | 1892985 | 2393610 | 2394959 | 1907400 | 1908749 | 78256 | 79605 | 85459 | 86808 | 80009  | 81358  | 81022 | 82371 | 90115  | 91464  |
| 123 | BPSS0062         |  | 69615 | 71543 | 1892929 | 1891001 | 2395015 | 2396943 | 1908805 | 1910733 | 79661 | 81589 | 86864 | 88792 | 81414  | 83342  | 82427 | 84355 | 91520  | 93448  |
| 124 | BPSS0063         |  | 71530 | 72873 | 1891014 | 1889671 | 2396930 | 2398273 | 1910720 | 1912063 | 81576 | 82919 | 88779 | 90122 | 83329  | 84672  | 84342 | 85685 | 93435  | 94778  |
| 125 | BPSS0064         |  | 74757 | 74341 | 1887787 | 1888203 | 2400156 | 2399740 | 1913946 | 1913530 | 84802 | 84386 | 92013 | 91597 | 86555  | 86139  | 87569 | 87153 | 96660  | 96244  |
| 126 | BPSS0065         |  | 75164 | 77104 | 1887380 | 1885440 | 2400585 | 2402534 | 1914375 | 1916324 | 85224 | 87173 | 92420 | 92671 | 86984  | 88933  | 87976 | 89916 | 97066  | 99006  |
| 127 | BPSS0066         |  | 77359 | 77868 | 1885185 | 1884676 | 2402789 | 2403298 | 1916579 | 1917088 | 87427 | 87936 | 94615 | 95124 | 89188  | 89697  | 90171 | 90680 | 99260  | 99769  |
| 128 | BPSS0067         |  | 78243 | 80435 | 1884301 | 1882109 | 2403673 | 2405865 | 1917463 | 1919655 | 88311 | 90503 | 95478 | 97670 | 90072  | 92264  | 91055 | 93247 | 100144 | 102336 |
| 129 | BURPS1106A_A0093 |  | 81301 | 81666 |         |         |         |         |         |         |       |       |       |       |        |        |       |       |        |        |
| 130 | BURPS1106A_A0094 |  | 82340 | 82975 |         |         |         |         |         |         |       |       |       |       |        |        |       |       |        |        |
| 131 | BURPS1106A_A0095 |  | 83684 | 83809 |         |         |         |         |         |         |       |       |       |       |        |        |       |       |        |        |
| 132 | BURPS1106A_A0096 |  | 84481 | 85209 |         |         |         |         |         |         |       |       |       |       |        |        |       |       |        |        |
| 133 | BURPS1106A_A0097 |  | 85469 | 85618 |         |         |         |         |         |         |       |       |       |       |        |        |       |       |        |        |
| 134 | BURPS1655_C0693  |  |       |       |         |         |         |         |         |         |       |       |       |       |        |        |       |       | 107517 | 107368 |
| 135 | BURPS1655_C0694  |  |       |       |         |         |         |         |         |         |       |       |       |       |        |        |       |       | 106191 | 107108 |
| 136 | BURPS1655_C0695  |  |       |       |         |         |         |         |         |         |       |       |       |       |        |        |       |       | 105586 | 105711 |
| 137 | BURPS1655_C0696  |  |       |       |         |         |         |         |         |         |       |       |       |       |        |        |       |       | 103568 | 103000 |
| 138 | BURPS1710A_A2581 |  |       |       |         |         | 2407096 | 2406839 |         |         |       |       |       |       |        |        |       |       |        |        |
| 139 | BURPS1710A_A2582 |  |       |       |         |         | 2408786 | 2407770 |         |         |       |       |       |       |        |        |       |       |        |        |
| 140 | BURPS1710A_A2583 |  |       |       |         |         | 2409105 | 2409239 |         |         |       |       |       |       |        |        |       |       |        |        |
| 141 | BURPS1710A_A2584 |  |       |       |         |         | 2409314 | 2409427 |         |         |       |       |       |       |        |        |       |       |        |        |
| 142 | BURPS1710A_A2585 |  |       |       |         |         | 2409455 | 2409571 |         |         |       |       |       |       |        |        |       |       |        |        |
| 143 | BURPS1710A_A2586 |  |       |       |         |         | 2409722 | 2410639 |         |         |       |       |       |       |        |        |       |       |        |        |
| 144 | BURPS1710A_A2587 |  |       |       |         |         | 2411048 | 2410899 |         |         |       |       |       |       |        |        |       |       |        |        |
| 145 | BURPS1710b_A1578 |  |       |       |         |         |         |         | 1922595 | 1923014 |       |       |       |       |        |        |       |       |        |        |
| 146 | BURPS1710b_A1579 |  |       |       |         |         |         |         | 1923512 | 1924429 |       |       |       |       |        |        |       |       |        |        |
| 147 | BURPS1710b_A1580 |  |       |       |         |         |         |         | 1924416 | 1925270 |       |       |       |       |        |        |       |       |        |        |
| 148 | BURPS1710b_A1581 |  |       |       |         |         |         |         | 1924940 | 1926298 |       |       |       |       |        |        |       |       |        |        |
| 149 | BURPS406E_P0442  |  |       |       |         |         |         |         |         |         | 95686 | 95537 |       |       |        |        |       |       |        |        |
| 150 | BURPS406E_P0443  |  |       |       |         |         |         |         |         |         | 94360 | 95277 |       |       |        |        |       |       |        |        |
| 151 | BURPS406E_P0444  |  |       |       |         |         |         |         |         |         | 93743 | 93877 |       |       |        |        |       |       |        |        |
| 152 | BURPSAST_X0004   |  |       |       |         |         |         |         |         |         |       |       |       |       | 100851 | 100588 |       |       |        |        |
| 153 | BURPSAST_X0005   |  |       |       |         |         |         |         |         |         |       |       |       |       | 100594 | 99740  |       |       |        |        |
| 154 | BURPSAST_X0007   |  |       |       |         |         |         |         |         |         |       |       |       |       | 97549  | 98907  |       |       |        |        |
| 155 | BURPSAST_X0008   |  |       |       |         |         |         |         |         |         |       |       |       |       | 97447  | 97298  |       |       |        |        |
| 156 | BURPSAST_X0009   |  |       |       |         |         |         |         |         |         |       |       |       |       | 96193  | 97038  |       |       |        |        |
| 157 | BURPSAST_X0010   |  |       |       |         |         |         |         |         |         |       |       |       |       | 95504  | 95638  |       |       |        |        |
| 158 | BURPSAST_X0011   |  |       |       |         |         |         |         |         |         |       |       |       |       | 93495  | 93238  |       |       |        |        |
| 159 | BPSS0068         |  |       |       |         |         |         |         |         |         |       |       | 98177 | 98908 |        |        | 93777 | 94262 |        |        |

|     |                  |       |       |         |         |         |         |         |         |        |        |        |        |         |         |  |         |         |         |         |
|-----|------------------|-------|-------|---------|---------|---------|---------|---------|---------|--------|--------|--------|--------|---------|---------|--|---------|---------|---------|---------|
| 160 | BPSS0069         |       |       |         |         |         |         |         |         |        |        |        |        |         |         |  | 96876   | 94939   |         |         |
| 161 | BPSS0070         |       |       |         |         |         |         |         |         | 99387  | 100631 |        |        |         |         |  | 94986   | 96230   |         |         |
| 162 | BPSS0072         |       |       |         |         |         |         |         |         | 101599 | 101276 |        |        |         |         |  | 97198   | 96875   |         |         |
| 163 | BPSS0072A        |       |       |         |         |         |         |         |         | 102084 | 102248 |        |        |         |         |  | 97683   | 97847   |         |         |
| 164 | BPSS0073         |       |       |         |         |         |         |         |         | 103267 | 102251 |        |        |         |         |  | 98866   | 97850   |         |         |
| 165 | BPSS0074         |       |       |         |         |         |         |         |         | 103359 | 103718 |        |        |         |         |  | 98958   | 99317   |         |         |
| 166 | BPSS0075         |       |       |         |         |         |         |         |         | 104224 | 105141 |        |        |         |         |  | 99822   | 100739  |         |         |
| 167 | BPSS0076         |       |       |         |         |         |         |         |         | 105128 | 105979 |        |        |         |         |  | 100726  | 101577  |         |         |
| 168 | BPSS0077         |       |       |         |         |         |         |         |         | 105979 | 107007 |        |        |         |         |  | 101577  | 102605  |         |         |
| 169 | BPSS0077A        |       |       |         |         |         |         |         |         | 107598 | 107900 |        |        | 1666773 | 1666471 |  | 1628788 | 1628486 | 109620  | 109922  |
| 170 | BURPS1106B_1891  | 87721 | 88023 | 1874823 | 1874521 | 2413151 | 2413453 | 1926941 | 1927243 | 97789  | 98091  |        |        |         |         |  |         |         |         |         |
| 171 | BURPS1106B_1893  |       |       | 1876926 | 1877075 |         |         |         |         |        |        |        |        |         |         |  |         |         |         |         |
| 172 | BURPS1106B_1894  |       |       | 1878860 | 1878735 |         |         |         |         |        |        |        |        |         |         |  |         |         |         |         |
| 173 | BURPS1106B_1895  |       |       | 1880070 | 1880204 |         |         |         |         |        |        |        |        |         |         |  |         |         |         |         |
| 174 | BPSS0078         |       |       | 1880878 | 1881243 |         |         |         |         |        |        |        |        |         |         |  |         |         |         |         |
| 175 | BPSS0079         | 88356 | 91124 | 1873971 | 1873546 | 2413786 | 2416164 | 1929954 | 1930205 | 98424  | 101177 | 108232 | 111006 | 101398  | 104172  |  | 1628153 | 1625946 | 1456473 | 1453699 |
| 176 | BURPSPAST_I0001  | 91141 | 93378 | 1873529 | 1871292 | 2416432 | 2418669 | 1930222 | 1932459 | 101194 | 103431 | 111023 | 113260 | 104189  | 104791  |  | 1625361 | 1623124 | 113045  | 115282  |
| 177 | BURPSPAST_N0037  |       |       |         |         |         |         |         |         |        |        |        |        | 105489  | 106634  |  |         |         |         |         |
| 178 | BURPSPAST_N0036  |       |       |         |         |         |         |         |         |        |        |        |        | 107712  | 109193  |  |         |         |         |         |
| 179 | BURPSPAST_N0034  |       |       |         |         |         |         |         |         |        |        |        |        | 110253  | 111668  |  |         |         |         |         |
| 180 | BURPSPAST_N0035  |       |       |         |         |         |         |         |         |        |        |        |        | 111939  | 113018  |  |         |         |         |         |
| 181 | BURPSPAST_N0033  |       |       |         |         |         |         |         |         |        |        |        |        | 120399  | 112987  |  |         |         |         |         |
| 182 | BURPSPAST_N0032  |       |       |         |         |         |         |         |         |        |        |        |        | 120593  | 120396  |  |         |         |         |         |
| 183 | BURPSPAST_N0031  |       |       |         |         |         |         |         |         |        |        |        |        | 125221  | 120635  |  |         |         |         |         |
| 184 | BURPSPAST_N0030  |       |       |         |         |         |         |         |         |        |        |        |        | 125346  | 125224  |  |         |         |         |         |
| 185 | BURPSPAST_N0029  |       |       |         |         |         |         |         |         |        |        |        |        | 125379  | 125594  |  |         |         |         |         |
| 186 | BURPSPAST_N0028  |       |       |         |         |         |         |         |         |        |        |        |        | 126255  | 126127  |  |         |         |         |         |
| 187 | BURPSPAST_N0027  |       |       |         |         |         |         |         |         |        |        |        |        | 126713  | 126426  |  |         |         |         |         |
| 188 | BURPSPAST_N0026  |       |       |         |         |         |         |         |         |        |        |        |        | 127276  | 126902  |  |         |         |         |         |
| 189 | BURPSPAST_N0025  |       |       |         |         |         |         |         |         |        |        |        |        | 127468  | 127277  |  |         |         |         |         |
| 190 | BURPSPAST_N0024  |       |       |         |         |         |         |         |         |        |        |        |        | 127866  | 127681  |  |         |         |         |         |
| 191 | BURPSPAST_N0023  |       |       |         |         |         |         |         |         |        |        |        |        | 128420  | 128238  |  |         |         |         |         |
| 192 | BURPSPAST_N0022  |       |       |         |         |         |         |         |         |        |        |        |        | 128481  | 128885  |  |         |         |         |         |
| 193 | BURPSPAST_N0021  |       |       |         |         |         |         |         |         |        |        |        |        | 129029  | 129457  |  |         |         |         |         |
| 194 | BURPSPAST_N0020  |       |       |         |         |         |         |         |         |        |        |        |        | 129650  | 130405  |  |         |         |         |         |
| 195 | BURPSPAST_N0019  |       |       |         |         |         |         |         |         |        |        |        |        | 130755  | 131108  |  |         |         |         |         |
| 196 | BURPSPAST_N0018  |       |       |         |         |         |         |         |         |        |        |        |        | 131779  | 131474  |  |         |         |         |         |
| 197 | BURPSPAST_N0017  |       |       |         |         |         |         |         |         |        |        |        |        | 132049  | 132180  |  |         |         |         |         |
| 198 | BURPSPAST_N0016  |       |       |         |         |         |         |         |         |        |        |        |        | 132375  | 132500  |  |         |         |         |         |
| 199 | BURPSPAST_N0015  |       |       |         |         |         |         |         |         |        |        |        |        | 132551  | 132745  |  |         |         |         |         |
| 200 | BURPSPAST_N0014  |       |       |         |         |         |         |         |         |        |        |        |        | 132767  | 132982  |  |         |         |         |         |
| 201 | BURPSPAST_N0013  |       |       |         |         |         |         |         |         |        |        |        |        | 132993  | 133259  |  |         |         |         |         |
| 202 | BURPSPAST_N0012  |       |       |         |         |         |         |         |         |        |        |        |        | 133412  | 134299  |  |         |         |         |         |
| 203 | Bp_chr2_2_IS407A |       |       |         |         |         |         |         |         |        |        |        |        | 134415  | 134789  |  |         |         |         |         |
| 204 | BURPSPAST_N0011  |       |       |         |         |         |         |         |         |        |        |        |        | 135207  | 136442  |  |         |         |         |         |
| 205 | BURPSPAST_N0010  |       |       |         |         |         |         |         |         |        |        |        |        | 136087  | 135254  |  |         |         |         |         |
| 206 | BURPSPAST_N0009  |       |       |         |         |         |         |         |         |        |        |        |        | 136374  | 136111  |  |         |         |         |         |
| 207 | BURPSPAST_N0008  |       |       |         |         |         |         |         |         |        |        |        |        | 136533  | 137428  |  |         |         |         |         |
| 208 | BURPSPAST_N0007  |       |       |         |         |         |         |         |         |        |        |        |        | 138209  | 138349  |  |         |         |         |         |
| 209 | BURPSPAST_N0006  |       |       |         |         |         |         |         |         |        |        |        |        | 139129  | 138821  |  |         |         |         |         |
| 210 | BURPSPAST_N0005  |       |       |         |         |         |         |         |         |        |        |        |        | 139413  | 139526  |  |         |         |         |         |
| 211 | BURPSPAST_N0004  |       |       |         |         |         |         |         |         |        |        |        |        | 139928  | 147481  |  |         |         |         |         |
| 212 | BURPSPAST_N0003  |       |       |         |         |         |         |         |         |        |        |        |        | 147505  | 150474  |  |         |         |         |         |
| 213 | BURPSPAST_N0002  |       |       |         |         |         |         |         |         |        |        |        |        | 150604  | 155019  |  |         |         |         |         |
| 214 | BURPSPAST_N0001  |       |       |         |         |         |         |         |         |        |        |        |        | 155075  | 157933  |  |         |         |         |         |
| 215 | BPSS0080         |       |       |         |         | 2418991 | 2420343 | 1932781 | 1934133 | 103753 | 105105 |        |        |         |         |  | 105394  | 106746  |         |         |
| 216 | BPSS0080a        | 95068 | 95328 | 1869602 | 1869342 | 2420356 | 2420616 | 1934146 | 1934406 | 105118 | 105378 | 114950 | 115210 | 165563  | 165823  |  | 106759  | 107019  | 116972  | 117232  |
| 217 | BPSS0081         | 96165 | 95749 | 1868505 | 1868921 | 2421453 | 2421037 | 1935243 | 1934827 | 106215 | 105799 | 116047 | 115631 | 166660  | 166244  |  | 107856  | 107440  | 118069  | 117653  |





|     |                 |  |  |  |  |  |        |        |        |        |
|-----|-----------------|--|--|--|--|--|--------|--------|--------|--------|
| 334 | BURPS1655_C0636 |  |  |  |  |  |        |        | 175360 | 175235 |
| 335 | BURPS406E_P0322 |  |  |  |  |  | 217011 | 217136 |        |        |
| 336 | BURPS406E_P0323 |  |  |  |  |  | 216362 | 216724 |        |        |
| 337 | BURPS406E_P0324 |  |  |  |  |  | 215682 | 214915 |        |        |
| 338 | BURPS406E_P0325 |  |  |  |  |  | 214681 | 214872 |        |        |
| 339 | BURPS406E_P0326 |  |  |  |  |  | 214353 | 214694 |        |        |
| 340 | BURPS406E_P0327 |  |  |  |  |  | 213289 | 214356 |        |        |
| 341 | BURPS406E_P0328 |  |  |  |  |  | 212359 | 213273 |        |        |
| 342 | BURPS406E_P0329 |  |  |  |  |  | 210983 | 212341 |        |        |
| 343 | BURPS406E_P0330 |  |  |  |  |  | 210505 | 210858 |        |        |
| 344 | BURPS406E_P0331 |  |  |  |  |  | 209316 | 210494 |        |        |
| 345 | BURPS406E_P0332 |  |  |  |  |  | 208675 | 209331 |        |        |
| 346 | BURPS406E_P0333 |  |  |  |  |  | 207890 | 208678 |        |        |
| 347 | BURPS406E_P0334 |  |  |  |  |  | 207133 | 207858 |        |        |
| 348 | BURPS406E_P0335 |  |  |  |  |  | 205942 | 207129 |        |        |
| 349 | BURPS406E_P0336 |  |  |  |  |  | 205220 | 205945 |        |        |
| 350 | BURPS406E_P0337 |  |  |  |  |  | 204807 | 205223 |        |        |
| 351 | BURPS406E_P0338 |  |  |  |  |  | 204375 | 204770 |        |        |
| 352 | BURPS406E_P0339 |  |  |  |  |  | 204216 | 203515 |        |        |
| 353 | BURPS406E_P0340 |  |  |  |  |  | 203132 | 202890 |        |        |
| 354 | BURPS406E_P0341 |  |  |  |  |  | 202367 | 202792 |        |        |
| 355 | BURPS406E_P0342 |  |  |  |  |  | 202092 | 202370 |        |        |
| 356 | BURPS406E_P0343 |  |  |  |  |  | 201327 | 202037 |        |        |
| 357 | BURPS406E_P0344 |  |  |  |  |  | 200857 | 201321 |        |        |
| 358 | BURPS406E_P0345 |  |  |  |  |  | 199690 | 200832 |        |        |
| 359 | BURPS406E_P0346 |  |  |  |  |  | 199388 | 199693 |        |        |
| 360 | BURPS406E_P0347 |  |  |  |  |  | 198991 | 199377 |        |        |
| 361 | BURPS406E_P0348 |  |  |  |  |  | 197632 | 198957 |        |        |
| 362 | BURPS406E_P0349 |  |  |  |  |  | 197111 | 197548 |        |        |
| 363 | BURPS406E_P0350 |  |  |  |  |  | 195807 | 197114 |        |        |
| 364 | BURPS406E_P0351 |  |  |  |  |  | 195082 | 195810 |        |        |
| 365 | BURPS406E_P0352 |  |  |  |  |  | 194069 | 195085 |        |        |
| 366 | BURPS406E_P0353 |  |  |  |  |  | 192493 | 194091 |        |        |
| 367 | BURPS406E_P0354 |  |  |  |  |  | 192068 | 192400 |        |        |
| 368 | BURPS406E_P0355 |  |  |  |  |  | 191231 | 190383 |        |        |
| 369 | BURPS406E_P0356 |  |  |  |  |  | 190379 | 190044 |        |        |
| 370 | BURPS406E_P0357 |  |  |  |  |  | 190047 | 189280 |        |        |
| 371 | BURPS406E_P0358 |  |  |  |  |  | 189280 | 189008 |        |        |
| 372 | BURPS406E_P0359 |  |  |  |  |  | 189003 | 188227 |        |        |
| 373 | BURPS406E_P0360 |  |  |  |  |  | 188234 | 187095 |        |        |
| 374 | BURPS406E_P0361 |  |  |  |  |  | 184832 | 185038 |        |        |
| 375 | BURPS406E_P0362 |  |  |  |  |  | 187098 | 185008 |        |        |
| 376 | BURPS406E_P0363 |  |  |  |  |  | 183786 | 184835 |        |        |
| 377 | BURPS406E_P0364 |  |  |  |  |  | 182664 | 183728 |        |        |
| 378 | BURPS406E_P0365 |  |  |  |  |  | 181994 | 182596 |        |        |
| 379 | BURPS406E_P0366 |  |  |  |  |  | 181087 | 182004 |        |        |
| 380 | BURPS406E_P0367 |  |  |  |  |  | 178690 | 181071 |        |        |
| 381 | BURPS406E_P0368 |  |  |  |  |  | 178196 | 178669 |        |        |
| 382 | BURPS406E_P0369 |  |  |  |  |  | 175910 | 178186 |        |        |
| 383 | BURPS406E_P0370 |  |  |  |  |  | 175542 | 175913 |        |        |
| 384 | BURPS406E_P0371 |  |  |  |  |  | 174599 | 175534 |        |        |
| 385 | BURPS406E_P0372 |  |  |  |  |  | 173729 | 174580 |        |        |
| 386 | BURPS406E_P0373 |  |  |  |  |  | 173602 | 173721 |        |        |
| 387 | BURPS406E_P0374 |  |  |  |  |  | 173432 | 173581 |        |        |
| 388 | BURPS406E_P0375 |  |  |  |  |  | 172427 | 173317 |        |        |
| 389 | BURPS406E_P0376 |  |  |  |  |  | 171159 | 172313 |        |        |
| 390 | BURPS406E_P0377 |  |  |  |  |  | 170519 | 171178 |        |        |
| 391 | BURPS406E_P0378 |  |  |  |  |  | 169935 | 170543 |        |        |

|     |                 |  |  |  |  |        |        |        |        |  |  |
|-----|-----------------|--|--|--|--|--------|--------|--------|--------|--|--|
| 392 | BURPS406E_P0379 |  |  |  |  | 169150 | 169938 |        |        |  |  |
| 393 | BURPS406E_P0380 |  |  |  |  | 168222 | 169157 |        |        |  |  |
| 394 | BURPS406E_P0381 |  |  |  |  | 166639 | 168225 |        |        |  |  |
| 395 | BURPS406E_P0382 |  |  |  |  | 166640 | 166524 |        |        |  |  |
| 396 | BURPS406E_P0383 |  |  |  |  | 166456 | 163844 |        |        |  |  |
| 397 | BURPS406E_P0384 |  |  |  |  | 163032 | 163778 |        |        |  |  |
| 398 | BURPS406E_P0385 |  |  |  |  | 163023 | 162898 |        |        |  |  |
| 399 | BURPS668_A0188  |  |  |  |  |        |        | 172666 | 172866 |  |  |
| 400 | BURPS668_A0189  |  |  |  |  |        |        | 173181 | 173396 |  |  |
| 401 | BURPS668_A0190  |  |  |  |  |        |        | 173494 | 174198 |  |  |
| 402 | BURPS668_A0191  |  |  |  |  |        |        | 174264 | 176756 |  |  |
| 403 | BURPS668_A0192  |  |  |  |  |        |        | 176944 | 177060 |  |  |
| 404 | BURPS668_A0193  |  |  |  |  |        |        | 177059 | 178645 |  |  |
| 405 | BURPS668_A0194  |  |  |  |  |        |        | 178642 | 179577 |  |  |
| 406 | BURPS668_A0195  |  |  |  |  |        |        | 179570 | 180358 |  |  |
| 407 | BURPS668_A0196  |  |  |  |  |        |        | 180355 | 180963 |  |  |
| 408 | BURPS668_A0197  |  |  |  |  |        |        | 180939 | 181598 |  |  |
| 409 | BURPS668_A0198  |  |  |  |  |        |        | 181579 | 182733 |  |  |
| 410 | BURPS668_A0199  |  |  |  |  |        |        | 182847 | 183737 |  |  |
| 411 | BURPS668_A0200  |  |  |  |  |        |        | 184022 | 184141 |  |  |
| 412 | BURPS668_A0201  |  |  |  |  |        |        | 184149 | 185000 |  |  |
| 413 | BURPS668_A0202  |  |  |  |  |        |        | 185019 | 185954 |  |  |
| 414 | BURPS668_A0203  |  |  |  |  |        |        | 185962 | 186333 |  |  |
| 415 | BURPS668_A0204  |  |  |  |  |        |        | 186330 | 188606 |  |  |
| 416 | BURPS668_A0205  |  |  |  |  |        |        | 188616 | 189089 |  |  |
| 417 | BURPS668_A0206  |  |  |  |  |        |        | 189110 | 191491 |  |  |
| 418 | BURPS668_A0207  |  |  |  |  |        |        | 191612 | 192424 |  |  |
| 419 | BURPS668_A0208  |  |  |  |  |        |        | 192414 | 193016 |  |  |
| 420 | BURPS668_A0209  |  |  |  |  |        |        | 193084 | 194148 |  |  |
| 421 | BURPS668_A0210  |  |  |  |  |        |        | 194206 | 195255 |  |  |
| 422 | BURPS668_A0211  |  |  |  |  |        |        | 195341 | 195457 |  |  |
| 423 | BURPS668_A0212  |  |  |  |  |        |        | 195427 | 197517 |  |  |
| 424 | BURPS668_A0213  |  |  |  |  |        |        | 197514 | 198653 |  |  |
| 425 | BURPS668_A0214  |  |  |  |  |        |        | 198646 | 199422 |  |  |
| 426 | BURPS668_A0215  |  |  |  |  |        |        | 199427 | 199699 |  |  |
| 427 | BURPS668_A0216  |  |  |  |  |        |        | 199699 | 200466 |  |  |
| 428 | BURPS668_A0217  |  |  |  |  |        |        | 200463 | 200810 |  |  |
| 429 | BURPS668_A0218  |  |  |  |  |        |        | 200814 | 201746 |  |  |
| 430 | BURPS668_A0219  |  |  |  |  |        |        | 201752 | 201880 |  |  |
| 431 | BURPS668_A0220  |  |  |  |  |        |        | 201922 | 202071 |  |  |
| 432 | BURPS668_A0221  |  |  |  |  |        |        | 202228 | 202356 |  |  |
| 433 | BURPS668_A0222  |  |  |  |  |        |        | 202498 | 202830 |  |  |
| 434 | BURPS668_A0223  |  |  |  |  |        |        | 202923 | 204521 |  |  |
| 435 | BURPS668_A0224  |  |  |  |  |        |        | 204502 | 205515 |  |  |
| 436 | BURPS668_A0225  |  |  |  |  |        |        | 205512 | 206240 |  |  |
| 437 | BURPS668_A0226  |  |  |  |  |        |        | 206237 | 207544 |  |  |
| 438 | BURPS668_A0227  |  |  |  |  |        |        | 207541 | 207978 |  |  |
| 439 | BURPS668_A0228  |  |  |  |  |        |        | 208054 | 209379 |  |  |
| 440 | BURPS668_A0229  |  |  |  |  |        |        | 209413 | 209799 |  |  |
| 441 | BURPS668_A0230  |  |  |  |  |        |        | 209810 | 210115 |  |  |
| 442 | BURPS668_A0231  |  |  |  |  |        |        | 210112 | 211254 |  |  |
| 443 | BURPS668_A0232  |  |  |  |  |        |        | 211279 | 211743 |  |  |
| 444 | BURPS668_A0233  |  |  |  |  |        |        | 211749 | 212459 |  |  |
| 445 | BURPS668_A0234  |  |  |  |  |        |        | 212514 | 212792 |  |  |
| 446 | BURPS668_A0235  |  |  |  |  |        |        | 212789 | 213214 |  |  |
| 447 | BURPS668_A0236  |  |  |  |  |        |        | 213201 | 213995 |  |  |
| 448 | BURPS668_A0237  |  |  |  |  |        |        | 214818 | 215192 |  |  |
| 449 | BURPS668_A0238  |  |  |  |  |        |        | 215229 | 215645 |  |  |

|              |                  |        |        |         |         |         |         |         |         |        |        |        |        |        |        |        |        |
|--------------|------------------|--------|--------|---------|---------|---------|---------|---------|---------|--------|--------|--------|--------|--------|--------|--------|--------|
| 450          | BURPS668_A0239   |        |        |         |         |         |         |         |         | 215642 | 216367 |        |        |        |        |        |        |
| 451          | BURPS668_A0240   |        |        |         |         |         |         |         |         | 216364 | 217551 |        |        |        |        |        |        |
| 452          | BURPS668_A0241   |        |        |         |         |         |         |         |         | 217555 | 218280 |        |        |        |        |        |        |
| 453          | BURPS668_A0242   |        |        |         |         |         |         |         |         | 218312 | 219100 |        |        |        |        |        |        |
| 454          | BURPS668_A0243   |        |        |         |         |         |         |         |         | 219097 | 219753 |        |        |        |        |        |        |
| 455          | BURPS668_A0244   |        |        |         |         |         |         |         |         | 219753 | 220916 |        |        |        |        |        |        |
| 456          | BURPS668_A0245   |        |        |         |         |         |         |         |         | 220927 | 221280 |        |        |        |        |        |        |
| 457          | BURPS668_A0246   |        |        |         |         |         |         |         |         | 221405 | 222763 |        |        |        |        |        |        |
| 458          | BURPS668_A0247   |        |        |         |         |         |         |         |         | 222781 | 223695 |        |        |        |        |        |        |
| 459          | BURPS668_A0248   |        |        |         |         |         |         |         |         | 223711 | 224778 |        |        |        |        |        |        |
| 460          | BURPS668_A0249   |        |        |         |         |         |         |         |         | 224784 | 225116 |        |        |        |        |        |        |
| 461          | BURPS668_A0250   |        |        |         |         |         |         |         |         | 225157 | 225294 |        |        |        |        |        |        |
| 462          | BURPS668_A0251   |        |        |         |         |         |         |         |         | 225337 | 226104 |        |        |        |        |        |        |
| 463          | BURPS668_A0252   |        |        |         |         |         |         |         |         | 226060 | 226245 |        |        |        |        |        |        |
| 464          | BURPS668_A0253   |        |        |         |         |         |         |         |         | 226373 | 226693 |        |        |        |        |        |        |
| 465          | BURPS668_A0254   |        |        |         |         |         |         |         |         | 226975 | 227145 |        |        |        |        |        |        |
| 466          | BURPS668_A0255   |        |        |         |         |         |         |         |         | 227374 | 227607 |        |        |        |        |        |        |
| 467          | BURPS668_A0256   |        |        |         |         |         |         |         |         | 227604 | 227765 |        |        |        |        |        |        |
| 468          | BURPS668_A0257   |        |        |         |         |         |         |         |         | 227969 | 228103 |        |        |        |        |        |        |
| 469 BPSS0120 |                  | 155556 | 153175 | 1809114 | 1811495 | 2480162 | 2477781 | 1993927 | 1991546 |        |        | 225669 | 223288 | 167983 | 165602 |        |        |
| 470 BPSS0121 |                  | 156627 | 155920 | 1808043 | 1808750 | 2481233 | 2480526 | 1994998 | 1994291 |        |        | 226740 | 226033 | 169054 | 168347 |        |        |
| 471 BPSS0122 |                  | 157750 | 157106 | 1806920 | 1807564 | 2482356 | 2481712 | 1996121 | 1995477 |        |        | 227863 | 227219 | 170177 | 169533 |        |        |
| 472 BPSS0123 |                  | 158642 | 157989 | 1806028 | 1806681 | 2483248 | 2482595 | 1997013 | 1996360 |        |        | 228755 | 228102 | 171069 | 170416 |        |        |
| 473 BPSS0124 |                  | 159650 | 160339 | 1805020 | 1804331 | 2484253 | 2484942 | 1998018 | 1998707 |        |        | 229760 | 230449 | 172080 | 172769 |        |        |
| 474 BPSS0125 |                  | 160944 | 160654 | 1803726 | 1804016 | 2485708 | 2485418 | 1999473 | 1999183 | 218917 | 218627 | 229499 | 229209 | 231054 | 230764 | 231275 | 230985 |
| 475 BPSS0126 |                  | 161435 | 162757 | 1803235 | 1801913 | 2486199 | 2487521 | 1999964 | 2001286 | 219408 | 220730 | 229991 | 231313 | 231545 | 232867 | 231766 | 233088 |
| 476 BPSS0127 |                  | 162834 | 163997 | 1801836 | 1800673 | 2487598 | 2488761 | 2001363 | 2002526 | 220807 | 221970 | 231390 | 232553 | 232944 | 234107 | 233165 | 234328 |
| 477 BPSS0128 |                  | 164163 | 165614 | 1800507 | 1799056 | 2488957 | 2490408 | 2002722 | 2004173 | 222146 | 223597 | 232739 | 234190 | 234313 | 235299 | 234504 | 235955 |
| 478 BPSS0129 |                  | 165876 | 167093 | 1798794 | 1797577 | 2490670 | 2491887 | 2004435 | 2005652 | 223859 | 225076 | 234440 | 235654 | 236019 | 237233 | 236217 | 237431 |
| 479 BPSS0130 |                  | 168157 | 170961 | 1796513 | 1793709 | 2492951 | 2495755 | 2006716 | 2009520 | 226140 | 228944 | 236719 | 239523 | 238307 | 241111 | 238505 | 241309 |
| 480 BPSS0131 |                  | 170998 | 171981 | 1793672 | 1792689 | 2495792 | 2496775 | 2009557 | 2010540 | 228981 | 229964 | 239560 | 240543 | 241148 | 242131 | 241346 | 242329 |
| 481 BPSS0132 |                  | 172008 | 172400 | 1792662 | 1792270 | 2496802 | 2497194 | 2010567 | 2010959 | 229991 | 230383 | 240570 | 240962 | 242158 | 242550 | 242356 | 242748 |
| 482 BPSS0133 |                  | 172646 | 173668 | 1792024 | 1791002 | 2497440 | 2498462 | 2011205 | 2012227 | 230639 | 231661 | 241228 | 242250 | 242796 | 243818 | 242994 | 244016 |
| 483 BPSS0134 |                  | 174653 | 173715 | 1790017 | 1790955 | 2499447 | 2498509 | 2013212 | 2012274 | 232646 | 231708 | 243235 | 242297 | 244803 | 243865 | 245001 | 244063 |
| 484 BPSS0135 |                  | 174720 | 175136 | 1789950 | 1789534 | 2499514 | 2499930 | 2013279 | 2013695 | 232713 | 233129 | 243302 | 243718 | 244870 | 245286 | 245068 | 245484 |
| 485 BPSS0136 |                  | 176557 | 175172 | 1788113 | 1789498 | 2501365 | 2499980 | 2015130 | 2013745 | 234590 | 233205 | 245147 | 243762 | 246707 | 245322 | 246912 | 245527 |
| 486 BPSS0137 |                  | 177844 | 178128 | 1786826 | 1786542 | 2502652 | 2502936 | 2016417 | 2016701 | 235876 | 236160 | 246433 | 246717 | 247994 | 248278 | 248199 | 248483 |
| 487 BPSS0138 |                  | 178307 | 178609 | 1786363 | 1786061 | 2503115 | 2503417 | 2016880 | 2017182 | 236339 | 236641 | 246896 | 247198 | 248457 | 248759 | 248662 | 248964 |
| 488 BPSS0139 |                  | 179324 | 180700 | 1785346 | 1783970 | 2504130 | 2505506 | 2017895 | 2019271 | 237356 | 238732 | 247911 | 249287 | 249472 | 250848 | 249679 | 251055 |
| 489 BPSS0140 |                  | 181783 | 180839 | 1782887 | 1783831 | 2506589 | 2505645 | 2020354 | 2019410 | 239822 | 238878 | 250377 | 249433 | 251931 | 250987 | 252145 | 251201 |
| 490 BPSS0141 |                  | 182894 | 181863 | 1781776 | 1782807 | 2507700 | 2506669 | 2021465 | 2020434 | 240933 | 239902 | 251488 | 250457 | 253042 | 252011 | 253256 | 252225 |
| 491 BPSS0142 |                  | 184490 | 182940 | 1780180 | 1781730 | 2509296 | 2507746 | 2023061 | 2021511 | 242529 | 240979 | 253084 | 251534 | 254638 | 253088 | 254852 | 253302 |
| 492 BPSS0143 |                  | 185727 | 184480 | 1778943 | 1780190 | 2510533 | 2509286 | 2024298 | 2023051 | 243766 | 242519 | 254321 | 253074 | 255875 | 254628 | 256089 | 254842 |
| 493 BPSS0144 |                  | 189246 | 186634 | 1775424 | 1778036 | 2514013 | 2511404 | 2027778 | 2025169 | 247246 | 244637 | 257843 | 255231 | 259394 | 256785 | 259389 | 256780 |
| 494          | BURPS1106A_A0201 | 189540 | 189953 |         |         |         |         |         |         |        |        |        |        |        |        |        |        |
| 495          | BURPS1655_C0539  |        |        |         |         |         |         |         |         |        |        |        |        |        |        | 260102 | 259533 |
| 496          | BURPS1710A_A2692 |        |        |         |         | 2514748 | 2514158 |         |         |        |        |        |        |        |        |        |        |
| 497          | BURPS406E_P0287  |        |        |         |         |         |         |         |         | 247987 | 247391 |        |        |        |        |        |        |
| 498          | BURPS668_A0290   |        |        |         |         |         |         |         |         |        |        | 257942 | 258742 |        |        |        |        |
| 499          | BURPSPAST_E0271  |        |        |         |         |         |         |         |         |        |        |        |        | 260106 | 259552 |        |        |
| 500          | BURPSS13_J0110   |        |        |         |         |         |         |         |         |        |        |        |        |        |        | 202624 | 201872 |
| 501 BPSS0145 |                  | 191347 | 189953 | 1773323 | 1774717 | 2516142 | 2514748 | 2029907 | 2028513 | 249381 | 247987 | 260136 | 258742 | 261500 | 260106 | 204018 | 202624 |
| 502          | BURPS1106B_1790  |        |        | 1774717 | 1775130 |         |         |         |         |        |        |        |        |        |        | 261496 | 260102 |
| 503 BPSS0146 |                  | 192039 | 191515 | 1772631 | 1773155 | 2516936 | 2516310 | 2030701 | 2030075 | 250175 | 249549 | 260959 | 260333 | 262294 | 261668 | 204841 | 204215 |
| 504 BPSS0147 |                  | 193358 | 192048 | 1771312 | 1772622 | 2518284 | 2516974 | 2032049 | 2030739 | 251523 | 250213 | 262307 | 260997 | 263642 | 262332 | 206196 | 205105 |
| 505 BPSS0148 |                  | 194589 | 193402 | 1770081 | 1771268 | 2519515 | 2518328 | 2033280 | 2032093 | 252754 | 251567 | 263538 | 262351 | 264873 | 263686 | 207427 | 206240 |
| 506          | BURPSS13_J0116   |        |        |         |         |         |         |         |         |        |        |        |        |        |        | 208808 | 207705 |
| 507 BPSS0149 |                  | 194768 | 195667 | 1769902 | 1769003 | 2519694 | 2520593 | 2033459 | 2034358 | 252934 | 253833 | 263718 | 264617 | 265053 | 265952 | 208964 | 209863 |











|     |                  |      |        |        |         |         |           |         |         |         |        |        |        |        |        |        |        |
|-----|------------------|------|--------|--------|---------|---------|-----------|---------|---------|---------|--------|--------|--------|--------|--------|--------|--------|
| 798 | BURPS668_A0638   |      |        |        |         |         |           |         |         |         |        | 599284 | 599838 |        |        |        |        |
| 799 | BURPS668_A0639   |      |        |        |         |         |           |         |         |         |        | 599850 | 600137 |        |        |        |        |
| 800 | BURPS668_A0640   |      |        |        |         |         |           |         |         |         |        | 600509 | 601333 |        |        |        |        |
| 801 | Bp_chr2_7_IS407A |      |        |        |         |         |           |         |         |         |        | 600590 | 601688 |        |        |        |        |
| 802 | BURPS668_A0641   |      |        |        |         |         |           |         |         |         |        | 601357 | 601620 |        |        |        |        |
| 803 | BURPS668_A0642   |      |        |        |         |         |           |         |         |         |        | 601686 | 601844 |        |        |        |        |
| 804 | BURPS668_A0643   |      |        |        |         |         |           |         |         |         |        | 601716 | 602684 |        |        |        |        |
| 805 | BURPS668_A0644   |      |        |        |         |         |           |         |         |         |        | 602875 | 603024 |        |        |        |        |
| 806 | BURPS668_A0645   |      |        |        |         |         |           |         |         |         |        | 603057 | 603806 |        |        |        |        |
| 807 | BURPS668_A0646   |      |        |        |         |         |           |         |         |         |        | 604424 | 604630 |        |        |        |        |
| 808 | BPSS0378         | GI13 |        |        |         |         |           |         |         |         |        |        |        |        |        |        |        |
| 809 | BPSS0379         | GI13 |        |        |         |         |           |         |         |         |        |        |        |        |        |        |        |
| 810 | BPSS0380         | GI13 |        |        |         |         |           |         |         |         |        |        |        |        |        |        |        |
| 811 | BPSS0380A        | GI13 |        |        |         |         |           |         |         |         |        |        |        |        |        |        |        |
| 812 | BPSS0380B        | GI13 |        |        |         |         |           |         |         |         |        |        |        |        |        |        |        |
| 813 | BPSS0381         | GI13 |        |        |         |         |           |         |         |         |        |        |        |        |        |        |        |
| 814 | BPSS0382         | GI13 |        |        |         |         |           |         |         |         |        |        |        |        |        |        |        |
| 815 | BPSS0383         | GI13 |        |        |         |         |           |         |         |         |        |        |        |        |        |        |        |
| 816 | BPSS0384         | GI13 |        |        |         |         |           |         |         |         |        |        |        |        |        |        |        |
| 817 | BPSS0384A        | GI13 |        |        |         |         |           |         |         |         |        |        |        |        |        |        |        |
| 818 | BPSS0385         | GI13 |        |        |         |         |           |         |         |         |        |        |        |        |        |        |        |
| 819 | BPSS0386         | GI13 |        |        |         |         |           |         |         |         |        |        |        |        |        |        |        |
| 820 | BPSS0387         | GI13 |        |        |         |         |           |         |         |         |        |        |        |        |        |        |        |
| 821 | BPSS0388         | GI13 |        |        |         |         |           |         |         |         |        |        |        |        |        |        |        |
| 822 | BPSS0389         | GI13 |        |        |         |         |           |         |         |         |        |        |        |        |        |        |        |
| 823 | BPSS0390         | GI13 |        |        |         |         |           |         |         |         |        |        |        |        |        |        |        |
| 824 | BPSS0391         | GI13 |        |        |         |         |           |         |         |         |        |        |        |        |        |        |        |
| 825 | BPSS0391A        | GI13 |        |        |         |         |           |         |         |         |        |        |        |        |        |        |        |
| 826 | BPSS0392         | GI13 | 519272 | 518898 | 1271392 | 1271018 | 2839749   | 2839375 | 2358096 | 2357722 | 577172 | 576798 |        |        |        | 498108 | 497734 |
| 827 | BPSS0393         | GI13 | 524155 | 524388 | 1276275 | 1276508 | 2840008   | 2839772 | 2358355 | 2358119 | 581754 | 581990 |        | 592423 | 592509 | 543417 | 543503 |
| 828 | BURPSPAST_D0354  |      |        |        |         |         |           |         |         |         |        |        |        | 592457 | 591570 |        | 502691 |
| 829 | BURPSS13_L0040   |      |        |        |         |         |           |         |         |         |        |        |        |        |        | 543451 | 542564 |
| 830 | BPSS0394         | GI13 | 523453 | 523734 | 1275573 | 1275854 | 2840709   | 2840428 | 2359056 | 2358775 | 581052 | 581333 |        |        |        | 501989 | 502270 |
| 831 | BPSS0395         | GI13 | 523248 | 523466 | 1275368 | 1275586 | 2840914   | 2840696 | 2359261 | 2359043 | 580848 | 580889 |        |        |        | 501785 | 501826 |
| 832 | BPSS0396         | GI13 | 522628 | 522356 | 1274748 | 1274476 | 2841534   | 2841806 | 2359881 | 2360153 | 580247 | 579975 |        |        |        | 501183 | 500911 |
| 833 | BPSS0397         | GI13 | 522343 | 522215 | 1274463 | 1274335 | 2841819   | 2841947 | 2360166 | 2360294 | 579962 | 579834 |        |        |        | 500898 | 500770 |
| 834 | BPSS0397A        | GI13 | 522210 | 522106 | 1274330 | 1274226 | 2841952</ |         |         |         |        |        |        |        |        |        |        |













[illegible]



|      |          |                  |  |         |         |        |        |        |        |         |         |         |         |         |         |         |         |         |         |         |         |
|------|----------|------------------|--|---------|---------|--------|--------|--------|--------|---------|---------|---------|---------|---------|---------|---------|---------|---------|---------|---------|---------|
| 1320 | BPSS0793 |                  |  | 1041212 | 1042051 | 699444 | 700283 | 186158 | 186997 | 2880519 | 2881358 | 1096393 | 1097232 | 1103713 | 1104552 | 1101203 | 1102042 | 1053682 | 1054521 | 1064682 | 1065521 |
| 1321 | BPSS0794 |                  |  | 1042206 | 1042979 | 700438 | 701211 | 187152 | 187925 | 2881513 | 2882286 | 1097381 | 1098154 | 1104707 | 1105480 | 1102197 | 1102970 | 1054676 | 1055449 | 1065676 | 1066449 |
| 1322 | BPSS0795 |                  |  | 1043018 | 1043353 | 701250 | 701585 | 187964 | 188299 | 2882325 | 2882660 | 1098193 | 1098528 | 1105519 | 1105854 | 1103009 | 1103344 | 1055488 | 1055823 | 1066488 | 1066823 |
| 1323 |          | BURPS1106A_A1090 |  | 1045325 | 1050334 |        |        |        |        |         |         |         |         |         |         |         |         |         |         |         |         |
| 1324 |          | BURPS1106B_0900  |  |         |         | 703557 | 708566 |        |        |         |         |         |         |         |         |         |         |         |         |         |         |
| 1325 |          | BURPS1655_I0382  |  |         |         |        |        |        |        |         |         |         |         |         |         |         |         |         |         | 1068796 | 1074384 |
| 1326 |          | BURPS1710A_A0235 |  |         |         |        |        | 190271 | 195352 |         |         |         |         |         |         |         |         |         |         |         |         |
| 1327 |          | BURPS406E_G0244  |  |         |         |        |        |        |        |         |         | 1100500 | 1105059 |         |         |         |         |         |         |         |         |
| 1328 |          | BURPSPAST_J0459  |  |         |         |        |        |        |        |         |         |         |         |         |         | 1105316 | 1110397 |         |         |         |         |
| 1329 |          | BURPSS13_T0219   |  |         |         |        |        |        |        |         |         |         |         |         |         |         |         | 1058003 | 1062202 |         |         |
| 1330 | BPSS0796 |                  |  |         |         |        |        |        |        |         |         |         |         | 1108004 | 1112941 |         |         |         |         |         |         |
| 1331 | BPSS0797 |                  |  | 1052499 | 1051762 | 710731 | 709994 | 197505 | 196768 | 2891866 | 2891129 | 1107202 | 1106465 | 1115098 | 1114361 | 1112540 | 1111803 | 1064367 | 1063630 | 1076533 | 1075796 |
| 1332 | BPSS0798 |                  |  | 1053078 | 1052617 | 711310 | 710849 | 198084 | 197623 | 2892445 | 2891984 | 1107781 | 1107320 | 1115677 | 1115216 | 1113119 | 1112658 | 1064946 | 1064485 | 1077113 | 1076652 |
| 1333 | BPSS0799 |                  |  | 1054314 | 1053097 | 712546 | 711329 | 199320 | 198103 | 2893681 | 2892464 | 1109017 | 1107800 | 1116913 | 1115696 | 1114355 | 1113138 | 1066182 | 1064965 | 1078349 | 1077132 |
| 1334 | BPSS0800 |                  |  | 1055805 | 1055194 | 714037 | 713426 | 200810 | 200199 | 2895171 | 2894560 | 1110507 | 1109896 | 1118404 | 1117793 | 1115846 | 1115235 | 1067672 | 1067061 | 1079840 | 1079229 |
| 1335 | BPSS0801 |                  |  | 1055920 | 1056354 | 714152 | 714586 | 200925 | 201359 | 2895286 | 2895720 | 1110622 | 1111056 | 1118519 | 1118953 | 1115961 | 1116395 | 1067787 | 1068221 | 1079955 | 1080389 |
| 1336 | BPSS0802 |                  |  | 1056506 | 1057645 | 714738 | 715877 | 201511 | 202650 | 2895872 | 2897011 | 1111214 | 1112353 | 1119102 | 1112024 | 1116547 | 1117686 | 1068373 | 1069512 | 1080541 | 1081680 |
| 1337 | BPSS0803 |                  |  | 1058122 | 1058754 | 716354 | 716986 | 203127 | 203759 | 2897488 | 2898120 | 1112818 | 1113450 | 1120714 | 1121346 | 1118175 | 1118807 | 1069989 | 1070621 | 1082157 | 1082789 |
| 1338 | BPSS0804 |                  |  | 1059192 | 1058818 | 717424 | 717050 | 204197 | 203823 | 2898558 | 2898184 | 1113888 | 1113514 | 1121784 | 1121410 | 1119245 | 1118871 | 1071059 | 1070685 | 1083227 | 1082853 |
| 1339 | BPSS0805 |                  |  | 1061904 | 1059841 | 720136 | 718073 | 206909 | 204846 | 2901270 | 2899207 | 1116600 | 1114537 | 1124496 | 1122433 | 1120707 | 1119751 | 1073761 | 1071698 | 1085939 | 1083876 |
| 1340 | BPSS0806 |                  |  | 1062698 | 1062234 | 720930 | 720466 | 207703 | 207239 | 2902064 | 2901600 | 1117394 | 1116930 | 1125290 | 1124826 | 112     |         |         |         |         |         |









|               |                  |         |         |         |         |        |        |       |       |         |         |         |         |         |         |         |         |         |         |
|---------------|------------------|---------|---------|---------|---------|--------|--------|-------|-------|---------|---------|---------|---------|---------|---------|---------|---------|---------|---------|
| 1610 BPSS1041 |                  | 1403420 | 1400190 | 1061655 | 1058425 | 547990 | 544760 | 60579 | 57349 | 1456694 | 1453464 | 1467400 | 1464170 | 1459014 | 1455784 | 1413368 | 1410138 | 1424918 | 1421688 |
| 1611 BPSS1042 |                  | 1404935 | 1403469 | 1063170 | 1061704 | 549505 | 548039 | 62094 | 60628 | 1458209 | 1456743 | 1468915 | 1467449 | 1460529 | 1459063 | 1414883 | 1413417 | 1426466 | 1424967 |
| 1612 BPSS1043 |                  | 1406304 | 1404949 | 1064539 | 1063184 | 550874 | 549519 | 63463 | 62108 | 1459578 | 1458223 | 1470284 | 1468929 | 1461898 | 1460543 | 1416252 | 1414897 | 1427835 | 1426480 |
| 1613 BPSS1044 |                  | 1407390 | 1407253 | 1065625 | 1065488 | 551962 | 551825 | 64551 | 64414 | 1460664 | 1460527 | 1471368 | 1471231 | 1462985 | 1462848 | 1417338 | 1417201 | 1428920 | 1428783 |
| 1614          | BURPS1106A_A1447 | 1407856 | 1408056 |         |         |        |        |       |       |         |         |         |         |         |         |         |         |         |         |
| 1615          | BURPS1106B_0543  |         |         | 1066091 | 1066291 |        |        |       |       |         |         |         |         |         |         |         |         |         |         |
| 1616 BPSS1045 |                  | 1408532 | 1408047 | 1066767 | 1066282 | 553093 | 552608 | 65682 | 65197 | 1461819 | 1461334 | 1472543 | 1472058 | 1464116 | 1463631 | 1418575 | 1418090 | 1430092 | 1429607 |
| 1617          | BURPS1655_I0730  |         |         |         |         |        |        |       |       |         |         |         |         |         |         |         |         | 1430321 | 1431298 |
| 1618          | BURPS668_A1534   |         |         |         |         |        |        |       |       |         |         | 1472771 | 1473748 |         |         |         |         |         |         |
| 1619 BPSS1046 |                  | 1408864 | 1409346 | 1067099 | 1067581 | 553425 | 553907 | 66014 | 66496 | 1462142 | 1462624 | 1473853 | 1474335 | 1464448 | 1464930 | 1418907 | 1419389 | 1431403 | 1431885 |
| 1620          | BURPS1655_I0732  |         |         |         |         |        |        |       |       |         |         |         |         |         |         |         |         | 1433277 | 1432516 |
| 1621          | BURPS1655_I0733  |         |         |         |         |        |        |       |       |         |         |         |         |         |         |         |         | 1434157 | 1433867 |
| 1622          | BURPS1655_I0734  |         |         |         |         |        |        |       |       |         |         |         |         |         |         |         |         | 1434304 | 1434564 |
| 1623 BPSS1047 |                  |         |         |         |         |        |        |       |       |         |         |         |         |         |         | 1419936 | 1419601 |         |         |
| 1624 BPSS1048 |                  |         |         |         |         |        |        |       |       |         |         |         |         |         |         | 1420317 | 1421096 |         |         |
| 1625 BPSS1049 |                  |         |         |         |         |        |        |       |       |         |         |         |         |         |         | 1422162 | 1422371 |         |         |
| 1626 BPSS1050 |                  |         |         |         |         |        |        |       |       |         |         |         |         |         |         | 1422576 | 1423814 |         |         |
| 1627 BPSS1051 |                  |         |         |         |         |        |        |       |       |         |         |         |         |         |         | 1423817 | 1424020 |         |         |
| 1628 BPSS1052 |                  |         |         |         |         |        |        |       |       |         |         |         |         |         |         | 1424023 | 1425813 |         |         |
| 1629 BPSS1053 |                  |         |         |         |         |        |        |       |       |         |         |         |         |         |         | 1425832 | 1426095 |         |         |
| 1630 BPSS1054 |                  |         |         |         |         |        |        |       |       |         |         |         |         |         |         | 1426095 | 1426298 |         |         |
| 1631 BPSS1055 |                  |         |         |         |         |        |        |       |       |         |         |         |         |         |         | 1426388 | 1427041 |         |         |
| 1632 BPSS1056 |                  |         |         |         |         |        |        |       |       |         |         |         |         |         |         | 1427245 | 1427397 |         |         |
| 1633 BPSS1057 |                  |         |         |         |         |        |        |       |       |         |         |         |         |         |         | 1427503 | 1428033 |         |         |
| 1634 BPSS1058 |                  |         |         |         |         |        |        |       |       |         |         |         |         |         |         | 1428033 | 1428767 |         |         |
| 1635 BPSS1059 |                  |         |         |         |         |        |        |       |       |         |         |         |         |         |         | 1428779 | 1429897 |         |         |
| 1636 BPSS1060 |                  |         |         |         |         |        |        |       |       |         |         |         |         |         |         | 1430426 | 1430785 | 1434634 | 1434825 |
| 1637 BPSS1061 |                  |         |         |         |         |        |        |       |       |         |         |         |         |         |         | 1430785 | 1431144 | 1434825 | 1435184 |
| 1638 BPSS1062 |                  |         |         |         |         |        |        |       |       |         |         |         |         |         |         | 1432246 | 1431194 |         |         |
| 1639 BPSS1063 |                  |         |         |         |         |        |        |       |       |         |         |         |         |         |         | 1434048 | 1432246 |         |         |
| 1640 BPSS1064 |                  |         |         |         |         |        |        |       |       |         |         |         |         |         |         | 1434156 | 1434962 |         |         |
| 1641 BPSS1065 |                  |         |         |         |         |        |        |       |       |         |         |         |         |         |         | 1434999 | 1436009 |         |         |
| 1642 BPSS1066 |                  |         |         |         |         |        |        |       |       |         |         |         |         |         |         | 1436009 | 1436692 |         |         |
| 1643 BPSS1067 |                  |         |         |         |         |        |        |       |       |         |         |         |         |         |         | 1436798 | 1437274 |         |         |
| 1644 BPSS1068 |                  |         |         |         |         |        |        |       |       |         |         |         |         |         |         | 1437277 | 1437525 |         |         |
| 1645 BPSS1069 |                  |         |         |         |         |        |        |       |       |         |         |         |         |         |         | 1437525 | 1437728 |         |         |
| 1646 BPSS1070 |                  |         |         |         |         |        |        |       |       |         |         |         |         |         |         | 1437746 | 1438087 |         |         |
| 1647 BPSS1071 |                  |         |         |         |         |        |        |       |       |         |         |         |         |         |         | 1438092 | 1438361 |         |         |
| 1648 BPSS1072 |                  |         |         |         |         |        |        |       |       |         |         |         |         |         |         | 1438361 | 1439170 |         |         |
| 1649 BPSS1073 |                  |         |         |         |         |        |        |       |       |         |         |         |         |         |         | 1439170 | 1439607 |         |         |
| 1650 BPSS1074 |                  |         |         |         |         |        |        |       |       |         |         |         |         |         |         | 1439715 | 1440128 |         |         |
| 1651 BPSS1075 |                  |         |         |         |         |        |        |       |       |         |         |         |         |         |         | 1440128 | 1440592 |         |         |
| 1652 BPSS1076 |                  |         |         |         |         |        |        |       |       |         |         |         |         |         |         |         |         |         |         |
| 1653 BPSS1077 |                  |         |         |         |         |        |        |       |       |         |         |         |         |         |         |         |         |         |         |
| 1654 BPSS1078 |                  |         |         |         |         |        |        |       |       |         |         |         |         |         |         |         |         |         |         |
| 1655 BPSS1079 |                  |         |         |         |         |        |        |       |       |         |         |         |         |         |         |         |         |         |         |
| 1656 BPSS1080 |                  |         |         |         |         |        |        |       |       |         |         |         |         |         |         | 1440629 | 1440808 |         |         |
| 1657 BPSS1081 |                  |         |         |         |         |        |        |       |       |         |         |         |         |         |         | 1440804 | 1441355 |         |         |
| 1658 BPSS1082 |                  |         |         |         |         |        |        |       |       |         |         |         |         |         |         | 1441369 | 1443729 |         |         |
| 1659 BPSS1083 |                  |         |         |         |         |        |        |       |       |         |         |         |         |         |         | 1443749 | 1444417 |         |         |
| 1660 BPSS1084 |                  |         |         |         |         |        |        |       |       |         |         |         |         |         |         | 1444484 | 1445644 |         |         |
| 1661 BPSS1085 |                  |         |         |         |         |        |        |       |       |         |         |         |         |         |         | 1445663 | 1446169 |         |         |
| 1662 BPSS1086 |                  |         |         |         |         |        |        |       |       |         |         |         |         |         |         | 1446230 | 1446571 |         |         |
| 1663 BPSS1087 |                  |         |         |         |         |        |        |       |       |         |         |         |         |         |         |         |         |         |         |
| 1664 BPSS1088 |                  |         |         |         |         |        |        |       |       |         |         |         |         |         |         |         |         |         |         |
| 1665 BPSS1089 |                  |         |         |         |         |        |        |       |       |         |         |         |         |         |         | 1449418 | 1450230 |         |         |
| 1666 BPSS1090 |                  | 1410819 | 1409707 | 1069054 | 1067942 | 555380 | 554268 | 67969 | 66857 | 1464097 | 1462985 | 1475828 | 1474716 | 1466403 | 1465291 | 1452163 | 1451051 | 1436975 | 1435863 |
| 1667          | BURPS668_A1538   |         |         |         |         |        |        |       |       |         |         | 1476107 | 1476310 |         |         |         |         |         |         |





|      |                  |  |        |        |        |        |         |         |  |  |
|------|------------------|--|--------|--------|--------|--------|---------|---------|--|--|
| 1784 | BURPS1710A_A0759 |  | 706832 | 702375 |        |        |         |         |  |  |
| 1785 | BURPS1710A_A0760 |  | 709889 | 706920 |        |        |         |         |  |  |
| 1786 | BURPS1710A_A0761 |  | 717568 | 709913 |        |        |         |         |  |  |
| 1787 | BURPS1710A_A0762 |  | 717981 | 717868 |        |        |         |         |  |  |
| 1788 | BURPS1710A_A0763 |  | 719535 | 719666 |        |        |         |         |  |  |
| 1789 | BURPS1710A_A0764 |  | 720661 | 719966 |        |        |         |         |  |  |
| 1790 | Bp_chr2_9_IS407A |  | 720952 | 722187 | 233758 | 234993 | 1628139 | 1629374 |  |  |
| 1791 | BURPS1710A_A0765 |  | 721020 | 721283 |        |        |         |         |  |  |
| 1792 | BURPS1710A_A0766 |  | 721307 | 722140 |        |        |         |         |  |  |
| 1793 | BURPS1710A_A0767 |  | 722979 | 722605 |        |        |         |         |  |  |
| 1794 | BURPS1710A_A0768 |  | 724199 | 724086 |        |        |         |         |  |  |
| 1795 | BURPS1710A_A0769 |  | 724573 | 724412 |        |        |         |         |  |  |
| 1796 | BURPS1710A_A0770 |  | 724843 | 724649 |        |        |         |         |  |  |
| 1797 | BURPS1710A_A0771 |  | 725019 | 724894 |        |        |         |         |  |  |
| 1798 | BURPS1710A_A0772 |  | 725624 | 725511 |        |        |         |         |  |  |
| 1799 | BURPS1710A_A0773 |  | 725660 | 725920 |        |        |         |         |  |  |
| 1800 | BURPS1710A_A0774 |  | 726047 | 726196 |        |        |         |         |  |  |
| 1801 | BURPS1710A_A0775 |  | 726639 | 726286 |        |        |         |         |  |  |
| 1802 | BURPS1710A_A0776 |  | 727744 | 726989 |        |        |         |         |  |  |
| 1803 | BURPS1710A_A0777 |  | 728365 | 727937 |        |        |         |         |  |  |
| 1804 | BURPS1710A_A0778 |  | 729144 | 728509 |        |        |         |         |  |  |
| 1805 | BURPS1710A_A0779 |  | 729528 | 729713 |        |        |         |         |  |  |
| 1806 | BURPS1710A_A0780 |  | 729926 | 730117 |        |        |         |         |  |  |
| 1807 | BURPS1710A_A0781 |  | 730118 | 730492 |        |        |         |         |  |  |
| 1808 | BURPS1710A_A0782 |  | 731182 | 731066 |        |        |         |         |  |  |
| 1809 | BURPS1710A_A0783 |  | 731462 | 731196 |        |        |         |         |  |  |
| 1810 | BURPS1710A_A0784 |  | 732015 | 731800 |        |        |         |         |  |  |
| 1811 | BURPS1710A_A0785 |  | 732173 | 736759 |        |        |         |         |  |  |
| 1812 | BURPS1710A_A0786 |  | 737130 | 744407 |        |        |         |         |  |  |
| 1813 | BURPS1710A_A0787 |  | 744448 | 745064 |        |        |         |         |  |  |
| 1814 | BURPS1710A_A0788 |  | 748037 | 746943 |        |        |         |         |  |  |
| 1815 | BURPS1710A_A0789 |  | 745121 | 746946 |        |        |         |         |  |  |
| 1816 | BURPS1710A_A0790 |  | 748340 | 748119 |        |        |         |         |  |  |
| 1817 | BURPS1710A_A0791 |  | 748390 | 748743 |        |        |         |         |  |  |
| 1818 | BURPS1710b_A0150 |  |        |        | 198378 | 198785 |         |         |  |  |
| 1819 | BURPS1710b_A0151 |  |        |        | 198993 | 200363 |         |         |  |  |
| 1820 | BURPS1710b_A0152 |  |        |        | 200357 | 200557 |         |         |  |  |
| 1821 | BURPS1710b_A0154 |  |        |        | 201740 | 202105 |         |         |  |  |
| 1822 | BURPS1710b_A0155 |  |        |        | 202482 | 202832 |         |         |  |  |
| 1823 | BURPS1710b_A0156 |  |        |        | 203258 | 204109 |         |         |  |  |
| 1824 | BURPS1710b_A0157 |  |        |        | 204106 | 204369 |         |         |  |  |
| 1825 | BURPS1710b_A0158 |  |        |        | 204570 | 204737 |         |         |  |  |
| 1826 | BURPS1710b_A0159 |  |        |        | 204784 | 212037 |         |         |  |  |
| 1827 | BURPS1710b_A0160 |  |        |        | 212267 | 215125 |         |         |  |  |
| 1828 | BURPS1710b_A0161 |  |        |        | 215181 | 219638 |         |         |  |  |
| 1829 | BURPS1710b_A0162 |  |        |        | 219726 | 222695 |         |         |  |  |
| 1830 | BURPS1710b_A0163 |  |        |        | 222719 | 230272 |         |         |  |  |
| 1831 | BURPS1710b_A0164 |  |        |        | 232157 | 232612 |         |         |  |  |
| 1832 | BURPS1710b_A0165 |  |        |        | 232772 | 233410 |         |         |  |  |
| 1833 | BURPS1710b_A0166 |  |        |        | 233826 | 234089 |         |         |  |  |
| 1834 | BURPS1710b_A0167 |  |        |        | 234113 | 234946 |         |         |  |  |
| 1835 | BURPS1710b_A0168 |  |        |        | 235411 | 235722 |         |         |  |  |
| 1836 | BURPS1710b_A0169 |  |        |        | 238891 | 239532 |         |         |  |  |
| 1837 | BURPS1710b_A0170 |  |        |        | 239795 | 240478 |         |         |  |  |
| 1838 | BURPS1710b_A0171 |  |        |        | 241315 | 242073 |         |         |  |  |
| 1839 | BURPS1710b_A0172 |  |        |        | 243007 | 243171 |         |         |  |  |
| 1840 | BURPS1710b_A0173 |  |        |        | 242924 | 243298 |         |         |  |  |
| 1841 | BURPS1710b_A0174 |  |        |        | 244606 | 244830 |         |         |  |  |

|                |                  |         |         |         |         |        |        |        |        |         |         |         |         |         |         |         |         |  |  |
|----------------|------------------|---------|---------|---------|---------|--------|--------|--------|--------|---------|---------|---------|---------|---------|---------|---------|---------|--|--|
| 1842           | BURPS1710b_A0175 |         |         |         |         |        | 244979 | 249565 |        |         |         |         |         |         |         |         |         |  |  |
| 1843           | BURPS1710b_A0176 |         |         |         |         |        | 249936 | 257213 |        |         |         |         |         |         |         |         |         |  |  |
| 1844           | BURPS1710b_A0177 |         |         |         |         |        | 257254 | 264630 |        |         |         |         |         |         |         |         |         |  |  |
| 1845           | BURPS1710b_A0178 |         |         |         |         |        | 264627 | 265709 |        |         |         |         |         |         |         |         |         |  |  |
| 1846           | BURPS406E_G0730  |         |         |         |         |        |        |        |        | 1593890 | 1593240 |         |         |         |         |         |         |  |  |
| 1847           | BURPS406E_G0731  |         |         |         |         |        |        |        |        | 1594858 | 1594451 |         |         |         |         |         |         |  |  |
| 1848           | BURPS406E_G0732  |         |         |         |         |        |        |        |        | 1596439 | 1595066 |         |         |         |         |         |         |  |  |
| 1849           | BURPS406E_G0733  |         |         |         |         |        |        |        |        | 1596591 | 1596436 |         |         |         |         |         |         |  |  |
| 1850           | BURPS406E_G0735  |         |         |         |         |        |        |        |        | 1597813 | 1598178 |         |         |         |         |         |         |  |  |
| 1851           | BURPS406E_G0736  |         |         |         |         |        |        |        |        | 1598905 | 1598555 |         |         |         |         |         |         |  |  |
| 1852           | BURPS406E_G0737  |         |         |         |         |        |        |        |        | 1598994 | 1598881 |         |         |         |         |         |         |  |  |
| 1853           | BURPS406E_G0738  |         |         |         |         |        |        |        |        | 1599821 | 1599693 |         |         |         |         |         |         |  |  |
| 1854           | BURPS406E_G0739  |         |         |         |         |        |        |        |        | 1607160 | 1599907 |         |         |         |         |         |         |  |  |
| 1855           | BURPS406E_G0740  |         |         |         |         |        |        |        |        | 1610248 | 1607390 |         |         |         |         |         |         |  |  |
| 1856           | BURPS406E_G0741  |         |         |         |         |        |        |        |        | 1614719 | 1610304 |         |         |         |         |         |         |  |  |
| 1857           | BURPS406E_G0742  |         |         |         |         |        |        |        |        | 1617818 | 1614849 |         |         |         |         |         |         |  |  |
| 1858           | BURPS406E_G0743  |         |         |         |         |        |        |        |        | 1625500 | 1617842 |         |         |         |         |         |         |  |  |
| 1859           | BURPS406E_G0744  |         |         |         |         |        |        |        |        | 1625913 | 1625800 |         |         |         |         |         |         |  |  |
| 1860           | BURPS406E_G0745  |         |         |         |         |        |        |        |        | 1628102 | 1627899 |         |         |         |         |         |         |  |  |
| 1861           | BURPS406E_C0001  |         |         |         |         |        |        |        |        | 1666604 | 1665522 |         |         |         |         |         |         |  |  |
| 1862           | BURPS406E_C0002  |         |         |         |         |        |        |        |        | 1658149 | 1665525 |         |         |         |         |         |         |  |  |
| 1863           | BURPS406E_C0003  |         |         |         |         |        |        |        |        | 1666919 | 1666698 |         |         |         |         |         |         |  |  |
| 1864           | BURPS406E_G0746  |         |         |         |         |        |        |        |        | 1628207 | 1628470 |         |         |         |         |         |         |  |  |
| 1865           | BURPS406E_G0747  |         |         |         |         |        |        |        |        | 1628494 | 1629327 |         |         |         |         |         |         |  |  |
| 1866           | BURPS406E_G0748  |         |         |         |         |        |        |        |        | 1630166 | 1629792 |         |         |         |         |         |         |  |  |
| 1867           | BURPS406E_G0749  |         |         |         |         |        |        |        |        | 1631386 | 1631273 |         |         |         |         |         |         |  |  |
| 1868           | BURPS406E_G0750  |         |         |         |         |        |        |        |        | 1631772 | 1631599 |         |         |         |         |         |         |  |  |
| 1869           | BURPS406E_G0751  |         |         |         |         |        |        |        |        | 1632030 | 1631836 |         |         |         |         |         |         |  |  |
| 1870           | BURPS406E_G0752  |         |         |         |         |        |        |        |        | 1632961 | 1633104 |         |         |         |         |         |         |  |  |
| 1871           | BURPS406E_G0753  |         |         |         |         |        |        |        |        | 1633213 | 1633914 |         |         |         |         |         |         |  |  |
| 1872           | BURPS406E_G0754  |         |         |         |         |        |        |        |        | 1634931 | 1634176 |         |         |         |         |         |         |  |  |
| 1873           | BURPS406E_G0755  |         |         |         |         |        |        |        |        | 1635552 | 1635124 |         |         |         |         |         |         |  |  |
| 1874           | BURPS406E_G0756  |         |         |         |         |        |        |        |        | 1636610 | 1635696 |         |         |         |         |         |         |  |  |
| 1875           | BURPS406E_G0757  |         |         |         |         |        |        |        |        | 1637305 | 1637679 |         |         |         |         |         |         |  |  |
| 1876           | BURPS406E_G0758  |         |         |         |         |        |        |        |        | 1638649 | 1638383 |         |         |         |         |         |         |  |  |
| 1877           | BURPS406E_G0759  |         |         |         |         |        |        |        |        | 1639202 | 1638987 |         |         |         |         |         |         |  |  |
| 1878           | BURPS406E_G0760  |         |         |         |         |        |        |        |        | 1639360 | 1643946 |         |         |         |         |         |         |  |  |
| 1879           | BURPS406E_G0761  |         |         |         |         |        |        |        |        | 1644182 | 1651594 |         |         |         |         |         |         |  |  |
| 1880           | BURPS406E_G0762  |         |         |         |         |        |        |        |        | 1651635 | 1658039 |         |         |         |         |         |         |  |  |
| 1881           | BURPSPAST_AD0041 |         |         |         |         |        |        |        |        |         |         |         | 1619497 | 1619850 |         |         |         |  |  |
| 1882           | BURPSPAST_AD0042 |         |         |         |         |        |        |        |        |         |         |         | 1619426 | 1619226 |         |         |         |  |  |
| 1883           | BURPSPAST_AD0043 |         |         |         |         |        |        |        |        |         |         |         | 1610677 | 1618053 |         |         |         |  |  |
| 1884           | BURPSPAST_AD0044 |         |         |         |         |        |        |        |        |         |         |         | 1619144 | 1618050 |         |         |         |  |  |
| 1885           | BURPSPAST_J0922  |         |         |         |         |        |        |        |        |         |         |         | 1596290 | 1595640 |         |         |         |  |  |
| 1886           | BURPSPAST_J0923  |         |         |         |         |        |        |        |        |         |         |         | 1598839 | 1597466 |         |         |         |  |  |
| 1887           | BURPSPAST_J0924  |         |         |         |         |        |        |        |        |         |         |         | 1598917 | 1599030 |         |         |         |  |  |
| 1888           | BURPSPAST_J0926  |         |         |         |         |        |        |        |        |         |         |         | 1600213 | 1600578 |         |         |         |  |  |
| 1889           | BURPSPAST_J0927  |         |         |         |         |        |        |        |        |         |         |         | 1601305 | 1600955 |         |         |         |  |  |
| 1890           | BURPSPAST_J0928  |         |         |         |         |        |        |        |        |         |         |         | 1601394 | 1601281 |         |         |         |  |  |
| 1891           | BURPSPAST_J0929  |         |         |         |         |        |        |        |        |         |         |         | 1602585 | 1601731 |         |         |         |  |  |
| 1892           | BURPSPAST_J0930  |         |         |         |         |        |        |        |        |         |         |         | 1602842 | 1602579 |         |         |         |  |  |
| 1893           | BURPSPAST_J0931  |         |         |         |         |        |        |        |        |         |         |         | 1603177 | 1603043 |         |         |         |  |  |
| 1894           | BURPSPAST_J0932  |         |         |         |         |        |        |        |        |         |         |         | 1610510 | 1603257 |         |         |         |  |  |
| 1895 BPSS1185a |                  |         |         |         |         |        |        |        |        | 1668018 | 1668140 | 1605275 | 1605397 |         |         |         |         |  |  |
| 1896 BPSS1187  |                  | 1540472 | 1541275 | 1198707 | 1199510 | 750059 | 750862 | 267743 | 268546 | 1668638 | 1669441 | 1605891 | 1606694 | 1621166 | 1621969 | 1581512 | 1582315 |  |  |
| 1897 BPSS1188  |                  | 1544173 | 1542089 | 1202408 | 1200324 | 753760 | 751676 | 271444 | 269360 | 1672446 | 1672288 | 1609592 | 1607508 | 1624867 | 1622783 | 1585213 | 1583129 |  |  |
| 1898 BPSS1190  |                  | 1545117 | 1544173 | 1203352 | 1202408 | 754704 | 753760 | 272388 | 271444 | 1673390 | 1672446 | 1610536 | 1609592 | 1625811 | 1624867 | 1586157 | 1585213 |  |  |
| 1899 BPSS1191  |                  | 1546193 | 1545132 | 1204428 | 1203367 | 755780 | 754719 | 273464 | 272403 | 1674466 | 1673405 | 1611612 | 1610551 | 1626887 | 1625826 | 1587233 | 1586172 |  |  |





[illegible]





|                |                  |         |         |        |        |         |         |        |        |         |         |         |         |         |         |         |         |         |         |
|----------------|------------------|---------|---------|--------|--------|---------|---------|--------|--------|---------|---------|---------|---------|---------|---------|---------|---------|---------|---------|
| 2190 BPSS1381  | BURPSS13_X0055   | 1841023 | 1843206 | 104357 | 102174 | 1053292 | 1055163 | 566698 | 568881 | 1966047 | 1968230 | 1906915 | 1909098 | 1916432 | 1918615 | 1873941 | 1876124 | 1704166 | 1706349 |
| 2191 BPSS1382  |                  | 1843206 | 1844219 | 102174 | 101161 | 1055163 | 1056176 | 568881 | 569894 | 1968230 | 1968457 | 1909098 | 1910111 | 1918615 | 1919628 | 1876124 | 1877137 | 1706349 | 1707362 |
| 2192 BPSS1383  |                  | 1844219 | 1844590 | 101161 | 100790 | 1056176 | 1056547 | 569894 | 570265 | 1969244 | 1969615 | 1910111 | 1910482 | 1919628 | 1919999 | 1877137 | 1877508 | 1707362 | 1707733 |
| 2193 BPSS1383a |                  | 1845602 | 1844871 | 99778  | 100509 | 1057559 | 1056828 | 571277 | 570546 | 1970627 | 1969896 | 1911496 | 1910765 | 1921011 | 1920280 | 1878520 | 1877789 | 1708745 | 1708014 |
| 2194 BPSS1384  |                  | 1847292 | 1845766 | 98088  | 99614  | 1059249 | 1057723 | 572967 | 571441 | 1972317 | 1970791 | 1913192 | 1911660 | 1922701 | 1921175 | 1880210 | 1878684 | 1710435 | 1708909 |
| 2195 BPSS1384a |                  |         |         |        |        | 1060153 | 1059788 | 573871 | 573506 |         |         |         |         | 1923605 | 1923240 | 1881114 | 1880749 | 1711338 | 1710973 |
| 2196 BPSS1385  |                  |         |         |        |        | 1061334 | 1060351 | 575052 | 574069 |         |         |         |         | 1924786 | 1923803 | 1882295 | 1881312 | 1712519 | 1711536 |
| 2197           |                  |         |         |        |        |         |         |        |        |         |         |         |         |         |         | 1882842 | 1883945 |         |         |
| 2198 BPSS1386  |                  | 1852204 | 1848392 | 93176  | 96988  | 1065776 | 1061940 | 579494 | 575658 | 1977259 | 1973417 | 1918093 | 1914290 | 1929228 | 1925392 | 1888094 | 1884258 | 1716961 | 1713125 |
| 2199 BPSS1387  |                  | 1852761 | 1852279 | 92619  | 93101  | 1066333 | 1065851 | 580051 | 579569 | 1977816 | 1977334 | 1918653 | 1918171 | 1929785 | 1929303 | 1888651 | 1888169 | 1717518 | 1717036 |
| 2200 BPSS1388  |                  | 1854594 | 1852789 | 90786  | 92591  | 1068166 | 1066361 | 581884 | 580079 | 1979649 | 1977844 | 1920486 | 1918681 | 1931618 | 1929813 | 1890484 | 1888679 | 1719351 | 1717546 |
| 2201 BPSS1389  |                  | 1856278 | 1854875 | 89102  | 90505  | 1069850 | 1068447 | 583568 | 582165 | 1981333 | 1979930 | 1922170 | 1920767 | 1933302 | 1931899 | 1892168 | 1890765 | 1721035 | 1719632 |
| 2202 BPSS1390  |                  | 1858438 | 1856675 | 86942  | 88705  | 1072010 | 1070247 | 585728 | 583965 | 1983493 | 1981730 | 1924330 | 1922567 | 1935462 | 1933699 | 1894328 | 1892565 | 1723195 | 1721432 |
| 2203 BPSS1391  |                  | 1859931 | 1858483 | 85449  | 86897  | 1073503 | 1072055 | 587221 | 585773 | 1984986 | 1983538 | 1925823 | 1924375 | 1936955 | 1935507 | 1895821 | 1894373 | 1724688 | 1723240 |
| 2204 BPSS1392  |                  | 1860924 | 1860109 | 84456  | 85271  | 1074496 | 1073681 | 588214 | 587399 | 1985979 | 1985164 | 1926816 | 1926001 | 1937948 | 1937133 | 1896814 | 1895999 | 1725681 | 1724866 |
| 2205 BPSS1393  |                  | 1861427 | 1860924 | 83953  | 84456  | 1074999 | 1074496 | 588717 | 588214 | 1986482 | 1985979 | 1927319 | 1926816 | 1938451 | 1937948 | 1897317 | 1896814 | 1726184 | 1725681 |
| 2206 BPSS1394  |                  | 1862797 | 1861451 | 82583  | 83929  | 1076369 | 1075023 | 590087 | 588741 | 1987852 | 1986506 | 1928689 | 1927343 | 1939821 | 1938475 | 1898687 | 1897341 | 1727554 | 1726208 |
| 2207 BPSS1395  |                  | 1863642 | 1862806 | 81738  | 82574  | 1077235 | 1076369 | 590953 | 590087 | 1988718 | 1987852 | 1929555 | 1928689 | 1940687 | 1939821 | 1899553 | 1898687 | 1728420 | 1727554 |
| 2208 BPSS1396  |                  | 1864394 | 1863630 | 80986  | 81750  | 1077987 | 1077223 | 591705 | 590941 | 1989470 | 1988706 | 1930307 | 1929543 | 1941439 | 1940675 | 1900305 | 1899541 | 1729172 | 1728408 |
| 2209 BPSS1397  |                  | 1865233 | 1864412 | 80147  | 80968  | 1078826 | 1078005 | 592544 | 591723 | 1990309 | 1989488 | 1931146 | 1930325 | 1942278 | 1941457 | 1901144 | 1900323 | 1730011 | 1729190 |
| 2210 BPSS1398  |                  | 1865657 | 1865274 | 79723  | 80106  | 1079250 | 1078867 | 592968 | 592585 | 1990733 | 1990350 | 1931570 | 1931187 | 1942702 | 1942319 | 1901568 | 1901185 | 1730435 | 1730052 |
| 2211 BPSS1399  |                  | 1866263 | 1865697 | 79117  | 79683  | 1079856 | 1079290 | 593574 | 593008 | 1991339 | 1990773 | 1932177 | 1931611 | 1943308 | 1942742 | 1902174 | 1901608 | 1731041 | 1730475 |
| 2212 BPSS1400  |                  | 1866550 | 1867605 | 78830  | 77775  | 1080143 | 1081198 | 593861 | 594916 | 1991626 | 1992681 | 1932464 | 1933519 | 1943595 | 1944650 | 1902461 | 1903516 | 1731328 | 1732383 |
| 2213 BPSS1401  |                  | 1867624 | 1869738 | 77756  | 75642  | 1081217 | 1083331 | 594935 | 597049 | 1992700 | 1994814 | 1933538 | 1935652 | 1944669 | 1946783 | 1903535 | 1905649 | 1732402 | 1734516 |
| 2214 BPSS1402  |                  | 1869738 | 1870421 | 75642  | 74959  | 1083331 | 1084014 | 597049 | 597732 | 1994814 | 1995497 | 1935652 | 1936335 | 1946783 | 1947466 | 1905649 | 1906332 | 1734516 | 1735199 |
| 2215 BPSS1403  |                  | 1870793 | 1871722 | 74587  | 73658  | 1084386 | 1085315 | 598104 | 599033 | 1995869 | 1996798 | 1936707 | 1937636 | 1947838 | 1948767 | 1906704 | 1907633 | 1735571 | 1736500 |
| 2216 BPSS1404  |                  | 1871709 | 1872356 | 73671  | 73024  | 1085302 | 1085949 | 599020 | 599667 | 1996785 | 1997432 | 1937623 | 1938270 | 1948754 | 1949401 | 1907620 | 1908267 | 1736487 | 1737134 |
| 2217 BPSS1405  |                  | 1872382 | 1872642 | 72998  | 72738  | 1085975 | 1086235 | 599693 | 599953 | 1997458 | 1997718 | 1938296 | 1938556 | 1949427 | 1949687 | 1908293 | 1908553 | 1737160 | 1737420 |
| 2218 BPSS1406  |                  | 1872650 | 1873600 | 72730  | 71780  | 1086243 | 1087193 | 599961 | 600911 | 1997726 | 1998676 | 1938564 | 1939514 | 1949695 | 1950645 | 1908561 | 1909511 | 1737428 | 1738378 |
| 2219 BPSS1407  |                  | 1873746 | 1874792 | 71634  | 70588  | 1087339 | 1088385 | 601057 | 602103 | 1998822 | 1999868 | 1939660 | 1940706 | 1950791 | 1951837 | 1909657 | 1910703 | 1738524 | 1739570 |
| 2220 BPSS1408  |                  | 1874850 | 1875095 | 70530  | 70285  | 1088443 | 1088688 | 602161 | 602406 | 1999926 | 2000171 | 1940764 | 1941009 | 1951895 | 1952140 | 1910761 | 1911006 | 1739628 | 1739873 |
| 2221 BPSS1409  |                  | 1875228 | 1875512 | 70152  | 69868  | 1088821 | 1089105 | 602539 | 602823 | 2000304 | 2000588 | 1941142 | 1941426 | 1952273 | 1952557 | 1911139 | 1911423 | 1740006 | 1740290 |
| 2222 BPSS1410  |                  | 1875628 | 1876080 | 69752  | 69300  | 1089221 | 1089673 | 602939 | 603391 | 2000704 | 2001156 | 1941542 | 1941994 | 1952673 | 1953125 | 1911539 | 1911991 | 1740406 | 1740858 |
| 2223 BPSS1411  |                  | 1876374 | 1877486 | 69006  | 67894  | 1090013 | 1091125 | 603731 | 604843 | 2001496 | 2002608 | 1942334 | 1943446 | 1953465 | 1954577 | 1912331 | 1913443 | 1741198 | 1742310 |
| 2224 BPSS1412  |                  | 1878398 | 1877919 | 66982  | 67461  | 1092037 | 1091558 | 605755 | 605276 | 2003520 | 2003041 | 1944358 | 1943879 | 1955489 | 1955010 | 1914355 | 1913876 | 1743222 | 1742743 |
| 2225 BPSS1413  |                  | 1879146 | 1878496 | 66234  | 66884  | 1092785 | 1092135 | 606503 | 605853 | 2004268 | 2003618 | 1945100 | 1944450 | 1956237 | 1955587 | 1915103 | 1914453 | 1743970 | 1743320 |
| 2226 BPSS1414  |                  | 1879298 | 1879999 | 66082  | 65381  | 1092937 | 1093638 | 606655 | 607356 | 2004420 | 2005121 | 1945252 | 1945953 | 1956389 | 1957090 | 1915255 | 1915956 | 1744122 | 1744823 |
| 2227 BPSS1415  |                  | 1880081 | 1880968 | 65299  | 64412  | 1093720 | 1094607 | 607438 | 608325 | 2005203 | 2006090 | 1946035 | 1946922 | 1957172 | 1958059 | 1916038 | 1916925 | 1744905 | 1745792 |
| 2228 BPSS1416  |                  | 1880982 | 1882358 | 64398  | 63022  | 1094621 | 1095997 | 608339 | 609715 | 2006104 | 2007456 | 1946936 | 1948312 | 1958073 | 1959449 | 1916939 | 1918339 | 1745806 | 1747206 |
| 2229 BPSS1417  |                  | 1882358 | 1882996 | 63022  | 62384  | 1095997 | 1096635 | 609715 | 610353 | 2007456 | 2008094 | 1948312 | 1948950 | 1959449 | 1960087 | 1918339 | 1918977 | 1747206 | 1747844 |
| 2230 BPSS1418  |                  | 1883088 | 1884422 | 62292  | 60958  | 1096727 | 1098061 | 610445 | 611779 | 2008186 | 2009520 | 1949042 | 1950376 | 1960179 | 1961513 | 1919069 | 1920403 | 1747936 | 1749270 |
| 2231 BPSS1419  |                  | 1884507 | 1885280 | 60873  | 60100  | 1098146 | 1098919 | 611864 | 612637 | 2009605 | 2010378 | 1950461 | 1951234 | 1961598 | 1962371 | 1920488 | 1921261 | 1749355 | 1750128 |
| 2232 BPSS1420  |                  | 1885311 | 1886279 | 60069  | 59101  | 1098950 | 1099918 | 612668 | 613636 | 2010409 | 2011377 | 1951265 | 1952233 | 1962402 | 1963370 | 1921292 | 1922260 | 1750159 | 1751127 |
| 2233           | BURPS1655_I1055  |         |         |        |        |         |         |        |        |         |         |         |         |         |         |         |         | 1751208 | 1751927 |
| 2234           | BURPS1710A_A1172 |         |         |        |        | 1100038 | 1100760 |        |        |         |         |         |         |         |         |         |         |         |         |
| 2235           | BURPSPAST_T0306  |         |         |        |        |         |         |        |        |         |         |         |         | 1963451 | 1964173 |         |         |         |         |
| 2236 BPSS1421  | BURPS668_A2028   | 1887053 | 1887841 | 58327  | 57539  | 1100772 | 1101560 | 614490 | 615278 | 2012179 | 2012967 | 1952955 | 1953743 | 1964185 | 1964973 | 1923101 | 1923889 | 1752039 | 1752818 |
| 2237 BPSS1422  |                  | 1889669 | 1888725 | 55711  | 56655  | 1103404 | 1102460 | 617122 | 616178 | 2014818 | 2013874 | 1955600 | 1954656 | 1966817 | 1965873 | 1925701 | 1924796 | 1754705 | 1753761 |
| 2238 BPSS1423  |                  | 1890953 | 1890006 | 54427  | 55374  | 1104688 | 1103741 | 618406 | 617459 | 2016095 | 2015148 | 1956891 | 1955944 | 1968101 | 1967154 | 1927018 | 1926071 | 1755982 | 1755035 |
| 2239 BPSS1424  |                  | 1892052 | 1891057 | 53328  | 54323  | 1105787 | 1104792 | 619505 | 618510 | 2017194 | 2016199 | 1957990 | 1956995 | 1969200 | 1968205 | 1928117 | 1927122 | 1757081 | 1756086 |
| 2240 BPSS1425  |                  | 1893077 | 1892178 | 52303  | 53202  | 1106811 | 1105912 | 620529 | 619630 | 2018219 | 2017320 | 1959015 | 1958116 | 1970225 | 1969326 | 1929141 | 1928242 | 1758106 | 1757207 |
| 2241 BPSS1426  | BURPSS13_X0102   | 1894239 | 1893073 | 51141  | 52307  | 1107973 | 1106807 | 621691 | 620525 | 2019270 | 2018428 | 1960177 | 1959011 | 1971387 | 1970221 | 1930303 | 1929137 | 1759268 | 1758102 |
| 2242           |                  |         |         |        |        |         |         |        |        |         |         | 1960941 | 1961291 |         |         |         |         |         |         |
| 2243           |                  |         |         |        |        |         |         |        |        |         |         |         |         |         |         | 1930871 | 1930350 |         |         |
| 2244 BPSS1427  |                  | 1895031 | 1895678 | 50349  | 49702  | 1108765 | 1109412 | 622483 | 623130 | 2020062 | 2020709 | 1961384 | 1962031 | 1972179 | 1972826 | 1931094 | 1931741 | 1760468 | 1761115 |
| 2245 BPSS1428  |                  | 1896262 | 1896474 | 49118  | 48906  | 1110008 | 1110220 | 623726 | 623938 | 2021311 |         |         |         |         |         |         |         |         |         |

|               |                  |                  |         |         |         |         |         |         |        |         |         |         |         |         |         |         |         |         |         |         |
|---------------|------------------|------------------|---------|---------|---------|---------|---------|---------|--------|---------|---------|---------|---------|---------|---------|---------|---------|---------|---------|---------|
| 2248 BPSS1430 | BURPS1106B_0040  | 1897938          | 1898270 | 47442   | 47110   | 1111684 | 1112016 | 625402  | 625734 | 2022987 | 2023319 | 1964308 | 1964640 | 1975086 | 1975418 | 1934007 | 1934339 | 1762262 | 1762594 |         |
| 2249          |                  |                  |         | 47790   | 47107   |         |         |         |        |         |         |         |         |         |         |         |         |         |         |         |
| 2250 BPSS1431 |                  |                  | 1898243 | 1898746 | 47137   | 46634   | 1111989 | 1112492 | 625707 | 626210  | 2023292 | 2023795 | 1964613 | 1965116 | 1975391 | 1975894 | 1934312 | 1934815 | 1762567 | 1762914 |
| 2251 BPSS1432 |                  |                  | 1898784 | 1899275 | 46596   | 46105   | 1112530 | 1113021 | 626248 | 626739  | 2023833 | 2024324 | 1965154 | 1965645 | 1975932 | 1976423 | 1934853 | 1935344 | 1763106 | 1763597 |
| 2252 BPSS1433 |                  |                  | 1899341 | 1900408 | 46039   | 44972   | 1113087 | 1114154 | 626805 | 627872  | 2024390 | 2025457 | 1965711 | 1966778 | 1976489 | 1977556 | 1935410 | 1936477 | 1763663 | 1764730 |
| 2253          |                  | BURPS1106A_A1945 | 1902108 | 1904618 |         |         |         |         |        |         |         |         |         |         |         |         |         |         |         |         |
| 2254          |                  | BURPS1106A_A1946 | 1904035 | 1909785 |         |         |         |         |        |         |         |         |         |         |         |         |         |         |         |         |
| 2255          |                  | BURPS1710A_A1194 |         |         |         |         | 1118673 | 1115854 |        |         |         |         |         |         |         |         |         |         |         |         |
| 2256          |                  | BURPS1710A_A1195 |         |         |         |         | 1122348 | 1118686 |        |         |         |         |         |         |         |         |         |         |         |         |
| 2257          |                  | BURPS1710b_A0458 |         |         |         |         |         |         | 629572 | 632391  |         |         |         |         |         |         |         |         |         |         |
| 2258          |                  | BURPS1710b_A0459 |         |         |         |         |         |         | 628976 | 637249  |         |         |         |         |         |         |         |         |         |         |
| 2259          |                  | BURPS1710b_A0460 |         |         |         |         |         |         | 632404 | 636066  |         |         |         |         |         |         |         |         |         |         |
| 2260          |                  | BURPS668_A2041   |         |         |         |         |         |         |        |         |         |         | 1970755 | 1974285 |         |         |         |         |         |         |
| 2261          |                  | BURPSPAST_T0326  |         |         |         |         |         |         |        |         |         |         |         |         | 1983157 | 1979255 |         |         |         |         |
| 2262 BPSS1434 |                  |                  |         |         |         |         |         |         |        |         |         |         |         |         |         |         |         |         |         |         |
| 2263 BPSS1437 |                  |                  | 1909938 | 1910258 | 35442   | 35122   | 1123684 | 1124004 | 637402 | 637722  | 2033634 | 2033954 | 1975900 | 1976220 | 1984493 | 1984813 | 1944633 | 1944953 | 1771851 | 1772171 |
| 2264          |                  | BURPS1106B_0032  |         |         | 40625   | 35595   |         |         |        |         |         |         |         |         |         |         |         |         |         |         |
| 2265          |                  | BURPS1106B_0033  |         |         | 40657   | 43272   |         |         |        |         |         |         |         |         |         |         |         |         |         |         |
| 2266 BPSS1438 |                  |                  | 1910791 | 1912584 | 34589   | 32796   | 1124529 | 1126322 | 638247 | 640040  | 2034473 | 2036266 | 1976758 | 1978551 | 1985338 | 1987131 | 1945507 | 1947300 | 1772704 | 1774497 |
| 2267          |                  | BURPS1106A_A1951 | 1913443 | 1918269 |         |         |         |         |        |         |         |         |         |         |         |         |         |         |         |         |
| 2268          |                  | BURPS1655_D1805  |         |         |         |         |         |         |        |         |         |         |         |         |         |         |         |         | 1778974 | 1775912 |
| 2269          |                  | BURPS1710A_A1201 |         |         |         |         | 1131027 | 1127737 |        |         |         |         |         |         |         |         |         |         |         |         |
| 2270          | BURPS1710b_A0463 |                  |         |         |         |         |         | 640898  | 645748 |         |         |         |         |         |         |         |         |         |         |         |
| 2271          | BURPS1710b_A0464 |                  |         |         |         |         |         | 641455  | 645360 |         |         |         |         |         |         |         |         |         |         |         |
| 2272          | BURPS406E_D1007  |                  |         |         |         |         |         |         |        | 2041564 | 2037695 |         |         |         |         |         |         |         |         |         |
| 2273          | BURPS668_A2047   |                  |         |         |         |         |         |         |        |         |         | 1979952 | 1983551 |         |         |         |         |         |         |         |
| 2274          | BURPSPAST_T0331  |                  |         |         |         |         |         |         |        |         |         |         |         | 1991776 | 1988546 |         |         |         |         |         |
| 2275          | BURPSS13_X0118   |                  |         |         |         |         |         |         |        |         |         |         |         |         |         | 1951181 | 1948716 |         |         |         |
| 2276 BPSS1439 |                  |                  |         |         |         |         |         |         |        |         |         |         |         |         |         |         |         |         |         |         |
| 2277 BPSS1442 |                  | 1918263          | 1919417 | 27118   | 25964   | 1132024 | 1133178 | 645742  | 646896 | 2041907 | 2043061 | 1984065 | 1985219 | 1992704 | 1993858 | 1951983 | 1953137 | 1779941 | 1781095 |         |
| 2278 BPSS1443 |                  | 1919466          | 1920587 | 25915   | 24794   | 1133227 | 1134348 | 646945  | 648066 | 2043110 | 2044231 | 1985268 | 1986389 | 1993907 | 1995028 | 1953186 | 1954307 | 1781144 | 1782265 |         |
| 2279 BPSS1444 |                  | 1922117          | 1920939 | 23264   | 24442   | 1135878 | 1134700 | 649596  | 648418 | 2045761 | 2044583 | 1987919 | 1986741 | 1996558 | 1995380 | 1955843 | 1954665 | 1783795 | 1782617 |         |
| 2280 BPSS1445 |                  | 1924213          | 1922222 | 21168   | 23159   | 1137980 | 1135983 | 651698  | 649701 | 2047848 | 2045857 | 1990021 | 1988024 | 1998660 | 1996663 | 1957939 | 1955948 | 1785897 | 1783900 |         |
| 2281 BPSS1446 |                  | 1925169          | 1924387 | 20212   | 20994   | 1138926 | 1138144 | 652644  | 651862 | 2048804 | 2048022 | 1990976 | 1990194 | 1999606 | 1998824 | 1958885 | 1958103 | 1786843 | 1786061 |         |
| 2282 BPSS1447 |                  | 1926797          | 1925193 | 18584   | 20188   | 1140554 | 1138950 | 654272  | 652668 | 2050432 | 2048828 | 1992604 | 1991000 | 2001234 | 1998630 | 1960513 | 1958909 | 1788471 | 1786867 |         |
| 2283 BPSS1448 |                  | 1928001          | 1926823 | 17380   | 18558   | 1141758 | 1140580 | 655476  | 654298 | 2051636 | 2050458 | 1993808 | 1992630 | 2002438 | 2001260 | 1961717 | 1960539 | 1789675 | 1788497 |         |
| 2284 BPSS1449 |                  | 1928281          | 1928970 | 17100   | 16411   | 1142038 | 1142727 | 655756  | 656445 | 2051916 | 2052605 | 1994088 | 1994777 | 2002718 | 2003407 | 1961997 | 1962686 | 1789955 | 1790644 |         |
| 2285 BPSS1450 |                  | 1929913          | 1930518 | 15468   | 14863   | 1143670 | 1144275 | 657388  | 657993 | 2053548 | 2054153 | 1995706 | 1996311 | 2004350 | 2004955 | 1963629 | 1964234 | 1791563 | 1793881 |         |
| 2286 BPSS1452 |                  | 1932372          | 1933832 | 13009   | 11549   | 1146133 | 1147593 | 659851  | 661311 | 2056010 | 2057470 | 1998168 | 1999628 | 2006812 | 2008272 | 1966088 | 1967548 | 1794022 | 1795482 |         |
| 2287 BPSS1453 |                  | 1934371          | 1937700 | 11010   | 7681    | 1148132 | 1151443 | 661850  | 665161 | 2058009 | 2061311 | 2000167 | 2003424 | 2008811 | 2012086 | 1968087 | 1971380 | 1796021 | 1798213 |         |
| 2288 BPSS1454 |                  | 1937852          | 1939051 | 7529    | 6330    | 1151595 | 1152794 | 665313  | 666512 | 2061463 | 2062662 | 2003576 | 2004769 | 2012238 | 2013437 | 1971532 | 1972731 | 1799511 | 1800710 |         |
| 2289 BPSS1455 |                  | 1939056          | 1939844 | 6325    | 5537    | 1152799 | 1153587 | 666517  | 667305 | 2062667 | 2063455 | 2004774 | 2005562 | 2013442 | 2014230 | 1972736 | 1973524 | 1800715 | 1801503 |         |
| 2290 BPSS1456 |                  | 1940235          | 1940852 | 5146    | 4529    | 1153978 | 1154595 | 667696  | 668313 | 2063850 | 2064467 | 2005953 | 2006570 | 2014621 | 2015238 | 1973915 | 1974532 | 1801894 | 1802511 |         |
| 2291 BPSS1457 |                  | 1940996          | 1942006 | 4385    | 3375    | 1154739 | 1155749 | 668457  | 669467 | 2064611 | 2065621 | 2006714 | 2007724 | 2015382 | 2016392 | 1974676 | 1975686 | 1802655 | 1803665 |         |
| 2292 BPSS1458 |                  | 1943918          | 1942536 | 1449    | 2831    | 1157619 | 1156237 | 671344  | 669962 | 2067433 | 2066051 | 2009438 | 2008059 | 2018057 | 2016675 | 1977612 | 1976230 | 1805549 | 1804167 |         |
| 2293 BPSS1459 |                  | 1944836          | 1944057 | 531     | 1310    | 1158537 | 1157758 | 672262  | 671483 | 2068351 | 2067572 | 2010359 | 2009580 | 2018975 | 2018196 | 1978530 | 1977751 | 1806467 | 1805688 |         |
| 2294          | BURPS668_A2072   |                  |         |         |         |         |         |         |        |         |         | 2010492 | 2010956 |         |         |         |         |         |         |         |
| 2295 BPSS1460 |                  | 1946802          | 1945444 | 3116451 | 3117767 | 1160512 | 1159154 | 674237  | 672879 | 2070433 | 2069075 | 2012323 | 2010965 | 2020929 | 2019571 | 1980484 | 1979126 | 1808430 | 1807051 |         |
| 2296 BPSS1461 |                  | 1947464          | 1946808 | 3115789 | 3116445 | 1161174 | 1160518 | 674899  | 674243 | 2071095 | 2070439 | 2012985 | 2012329 | 2021591 | 2020935 | 1981146 | 1980490 | 1809092 | 1808436 |         |
| 2297 BPSS1462 |                  | 1947663          | 1948049 | 3115590 | 3115204 | 1161373 | 1161759 | 675098  | 675484 | 2071294 | 2071680 | 2013184 | 2013570 | 2021790 | 2022176 | 1981345 | 1981731 | 1809291 | 1809677 |         |
| 2298 BPSS1463 |                  | 1948814          | 1949278 | 3114439 | 3113975 | 1162556 | 1163020 | 676281  | 676745 | 2072344 | 2072808 | 2014539 | 2015003 | 2022965 | 2023429 | 1982555 | 1983019 | 1810574 | 1811038 |         |
| 2299 BPSS1464 |                  | 1949303          | 1951639 | 3113950 | 3111614 | 1163045 | 1165381 | 676770  | 679106 | 2072833 | 2075169 | 2015028 | 2017373 | 2023454 | 2025790 | 1983044 | 1985380 | 1811063 | 1813399 |         |
| 2300 BPSS1465 |                  | 1951692          | 1952804 | 3111561 | 3110449 | 1165434 | 1166546 | 679159  | 680271 | 2075222 | 2076334 | 2017426 | 2018538 | 2025843 | 2026955 | 1985433 | 1986545 | 1813452 | 1814564 |         |
| 2301 BPSS1466 |                  | 1954333          | 1952825 | 3108920 | 3110428 | 1168075 | 1166567 | 681800  | 680292 | 2077863 | 2076355 | 2020667 | 2018559 | 2028484 | 2026976 | 1988074 | 1986566 | 1816093 | 1814585 |         |
| 2302 BPSS1467 |                  | 1955757          | 1954504 | 3107496 | 3108749 | 1169499 | 1168246 | 683224  | 681971 | 2079287 | 2078034 | 2021491 | 2020238 | 2029745 | 2029518 | 1989498 | 1988245 | 1817508 | 1816255 |         |
| 2303 BPSS1468 |                  | 1956801          | 1955785 | 3106452 | 3107468 | 1170543 | 1169527 | 684268  | 683252 | 2080331 | 2079315 | 2022535 | 2021519 | 2030789 | 2029773 | 1990542 | 1989526 | 1818522 | 1817536 |         |
| 2304 BPSS1469 |                  | 1956976          | 1957881 | 3106277 | 3105372 | 1170718 | 1171623 | 684443  | 685348 | 2080506 | 2081411 | 2022710 | 2023615 | 2030964 | 2031869 | 1990717 | 1991622 | 1818797 | 1819702 |         |
| 2305 BPSS1470 |                  | 1958687          | 1959985 | 3104566 | 3103268 | 1172417 | 1173715 | 686142  | 687440 | 2082202 | 2083500 | 2024409 | 2025707 | 2032678 | 2033976 | 1992428 | 1993726 | 1820481 | 1821779 |         |

|               |                  |         |         |         |         |         |         |        |        |         |         |         |         |         |         |         |         |         |         |
|---------------|------------------|---------|---------|---------|---------|---------|---------|--------|--------|---------|---------|---------|---------|---------|---------|---------|---------|---------|---------|
| 2306 BPSS1471 | BURPSPAST_T0367  | 1960041 | 1960736 | 3103212 | 3102517 | 1173771 | 1174466 | 687496 | 688191 | 2083556 | 2084251 | 2025763 | 2026458 | 2034032 | 2034727 | 1993782 | 1994477 | 1821835 | 1822530 |
| 2307          |                  |         |         |         |         |         |         |        |        |         |         |         |         | 2035148 | 2034696 |         |         |         |         |
| 2308 BPSS1472 |                  | 1307378 | 1306176 | 965630  | 964428  | 452590  | 451388  |        |        |         |         |         |         |         |         |         |         | 454640  | 453624  |
| 2309 BPSS1473 | BURPS1106A_A1996 | 1962994 | 1961204 | 3100259 | 3102049 | 1176724 | 1174934 | 690449 | 688659 | 2086512 | 2084722 | 2028720 | 2026930 | 2037010 | 2035220 | 1996735 | 1994945 | 1824802 | 1823012 |
| 2310          |                  | 1964395 | 1965045 |         |         |         |         |        |        |         |         |         |         |         |         |         |         |         |         |
| 2311          |                  |         |         |         |         |         |         |        |        |         |         | 2028749 | 2029192 |         |         |         |         |         |         |
| 2312 BPSS1474 | BURPS668_A2089   | 1964473 | 1963718 | 3098780 | 3099535 | 1178216 | 1177461 | 691941 | 691186 | 2087991 | 2087236 | 2030225 | 2029470 | 2038504 | 2037962 | 1998214 | 1997459 | 1826281 | 1825526 |
| 2313 BPSS1475 |                  | 1966433 | 1965081 | 3096820 | 3098172 | 1180190 | 1178838 | 693915 | 692563 | 2089951 | 2088599 | 2032199 | 2030847 | 2040480 | 2039761 | 2000174 | 1998822 | 1828269 | 1826917 |
| 2314          |                  |         |         |         |         |         |         |        |        |         |         |         |         | 2040708 | 2038966 |         |         |         |         |
| 2315 BPSS1476 | BURPSPAST_T0372  | 1968206 | 1966740 | 3095047 | 3096513 | 1181963 | 1180497 | 695688 | 694222 | 2091721 | 2090255 | 2033969 | 2032503 | 2042253 | 2040787 | 2001947 | 2000481 | 1830039 | 1828573 |
| 2316 BPSS1477 |                  | 1968379 | 1969104 | 3094874 | 3094149 | 1182135 | 1182860 | 695860 | 696585 | 2091895 | 2092620 | 2034140 | 2034865 | 2042425 | 2043150 | 2002120 | 2002845 | 1830211 | 1830936 |
| 2317 BPSS1478 |                  | 1969129 | 1970334 | 3094124 | 3092919 | 1182885 | 1184090 | 696610 | 697815 | 2092645 | 2093850 | 2034890 | 2036095 | 2043175 | 2044380 | 2002870 | 2004075 | 1830961 | 1832166 |
| 2318 BPSS1479 | BURPSPAST_T0380  | 1970386 | 1971414 | 3092867 | 3091839 | 1184142 | 1185170 | 697867 | 698895 | 2093902 | 2094930 | 2036147 | 2037175 | 2044432 | 2045460 | 2004127 | 2005155 | 1832218 | 1833246 |
| 2319 BPSS1480 |                  | 1972367 | 1972549 | 3090886 | 3090704 | 1186109 | 1186291 | 699834 | 700016 | 2095866 | 2096048 | 2038123 | 2038305 | 2046378 | 2046560 | 2006050 | 2006232 | 1834163 | 1834345 |
| 2320 BPSS1481 |                  | 1972665 | 1973540 | 3090588 | 3089713 | 1186407 | 1187282 | 700132 | 701007 | 2096164 | 2097039 | 2038421 | 2039296 | 2046676 | 2047551 | 2006348 | 2007223 | 1834461 | 1835336 |
| 2321          | BURPSPAST_T0380  |         |         |         |         |         |         |        |        |         |         |         |         | 2048319 | 2047756 |         |         |         |         |
| 2322 BPSS1482 |                  | 1974135 | 1974986 | 3089118 | 3088267 | 1187878 | 1188729 | 701603 | 702454 | 2097572 | 2098423 | 2039766 | 2040617 | 2048462 | 2049313 | 2007719 | 2008570 | 1835724 | 1836575 |
| 2323 BPSS1483 |                  | 1976269 | 1975247 | 3086984 | 3088006 | 1190012 | 1188990 | 703737 | 702715 | 2099706 | 2098684 | 2041876 | 2040878 | 2050672 | 2049887 | 2009853 | 2008831 | 1837849 | 1836836 |
| 2324 BPSS1484 | BURPS406E_D0946  | 1976381 | 1977595 | 3086872 | 3085658 | 1190124 | 1191338 | 703849 | 705063 | 2099818 | 2101032 | 2041988 | 2043202 | 2050784 | 2051998 | 2009965 | 2011179 | 1837961 | 1839175 |
| 2325 BPSS1485 |                  | 1977595 | 1978440 | 3085658 | 3084813 | 1191338 | 1192183 | 705063 | 705908 | 2101032 | 2101877 | 2043202 | 2044047 | 2051998 | 2052843 | 2011179 | 2012024 | 1839175 | 1840020 |
| 2326 BPSS1486 |                  | 1978489 | 1978926 | 3084764 | 3084327 | 1192232 | 1192669 | 705957 | 706394 | 2101926 | 2102363 | 2044096 | 2044533 | 2052892 | 2053329 | 2012073 | 2012510 | 1840069 | 1840506 |
| 2327 BPSS1487 | BURPS668_A2110   | 1979336 | 1980883 | 3083917 | 3082370 | 1193079 | 1194638 | 706804 | 708363 | 2102846 | 2104393 | 2044943 | 2046502 | 2053739 | 2055298 | 2013070 | 2014617 | 1840916 | 1842475 |
| 2328 BPSS1488 |                  | 1980911 | 1981744 | 3082342 | 3081509 | 1194666 | 1195499 | 708391 | 709224 | 2104421 | 2105254 | 2046540 | 2047349 | 2055326 | 2056159 | 2014645 | 2015478 | 1842503 | 1843336 |
| 2329 BPSS1489 |                  | 1981744 | 1982355 | 3081509 | 3080898 | 1195499 | 1196110 | 709224 | 709835 | 2105254 | 2105865 | 2047349 | 2047960 | 2056159 | 2056770 | 2015478 | 2016089 | 1843336 | 1843947 |
| 2330          | BURPSPAST_T0388  |         |         |         |         |         |         |        |        | 2106238 | 2106074 |         |         |         |         |         |         |         |         |
| 2331          |                  |         |         |         |         |         |         |        |        |         |         | 2048169 | 2048333 |         |         |         |         |         |         |
| 2332          |                  |         |         |         |         |         |         |        |        |         |         |         |         | 2057143 | 2056979 |         |         |         |         |
| 2333          | BURPSS13_X0182   |         |         |         |         |         |         |        |        |         |         |         |         |         |         | 2016462 | 2016298 |         |         |
| 2334 BPSS1490 | BURPS668_A2118   | 1983396 | 1984418 | 3079857 | 3078835 | 1197175 | 1198197 | 710900 | 711922 | 2106930 | 2107952 | 2049023 | 2050057 | 2057835 | 2058857 | 2017153 | 2018175 | 1844988 | 1846010 |
| 2335 BPSS1491 |                  | 1984690 | 1985946 | 3078563 | 3077307 | 1198469 | 1199725 | 712194 | 713450 | 2108224 | 2109480 | 2050329 | 2051543 | 2059148 | 2060404 | 2018447 | 2019703 | 1846282 | 1847538 |
| 2336          |                  |         |         |         |         |         |         |        |        |         |         | 2051578 | 2052714 |         |         |         |         |         |         |
| 2337 BPSS1492 | BURPS668_A2118   | 1985972 | 1987519 | 3077281 | 3075734 | 1199751 | 1201298 | 713476 | 715023 | 2109506 | 2111053 |         |         | 2060430 | 2061977 | 2019729 | 2021276 | 1847564 | 1849126 |
| 2338 BPSS1493 |                  | 1989556 | 1988225 | 3073697 | 3075028 | 1203287 | 1202004 | 717012 | 715729 | 2113039 | 2111759 | 2055317 | 2053419 | 2063949 | 2062678 | 2023292 | 2021982 |         |         |
| 2339 BPSS1494 |                  | 1990821 | 1990087 | 3072432 | 3073166 | 1204618 | 1203884 | 718343 | 717609 | 2114373 | 2113639 | 2056051 | 2055317 | 2065283 | 2064549 | 2024560 | 2023826 | 1852395 | 1851850 |
| 2340 BPSS1495 | BURPS668_A2118   | 1992662 | 1990821 | 3070591 | 3072432 | 1206444 | 1204618 | 720169 | 718343 | 2116214 | 2114373 | 2057880 | 2056051 | 2067124 | 2065283 | 2026401 | 2024560 | 1854236 | 1852395 |
| 2341 BPSS1496 |                  | 1992922 | 1993413 | 3070331 | 3069840 | 1206704 | 1207195 | 720429 | 720920 | 2116474 | 2116965 | 2058140 | 2058631 | 2067384 | 2067875 | 2026661 | 2027152 | 1854496 | 1854987 |
| 2342 BPSS1497 |                  | 1993440 | 1994936 | 3069813 | 3068317 | 1207222 | 1208718 | 720947 | 722443 | 2116992 | 2118488 | 2058658 | 2060154 | 2067902 | 2069398 | 2027179 | 2028675 | 1855014 | 1856510 |
| 2343 BPSS1498 | BURPS668_A2118   | 1995159 | 1995665 | 3068094 | 3067588 | 1208941 | 1209447 | 722666 | 723172 | 2118711 | 2119217 | 2060377 | 2060883 | 2069621 | 2070127 | 2028898 | 2029404 | 1856733 | 1857239 |
| 2344 BPSS1499 |                  | 1995661 | 1996119 | 3067592 | 3067134 | 1209443 | 1209901 | 723168 | 723626 | 2119213 | 2119671 | 2060879 | 2061337 | 2070123 | 2070581 | 2029400 | 2029858 | 1857235 | 1857693 |
| 2345 BPSS1500 |                  | 1996159 | 1997898 | 3067094 | 3065355 | 1209941 | 1211680 | 723666 | 725405 | 2119711 | 2121450 | 2061377 | 2063116 | 2070621 | 2072360 | 2029898 | 2031637 | 1857733 | 1859472 |
| 2346 BPSS1501 | BURPS668_A2118   | 1997889 | 1998908 | 3065364 | 3064345 | 1211671 | 1212690 | 725396 | 726415 | 2121441 | 2122460 | 2063107 | 2064126 | 2072351 | 2073370 | 2031628 | 2032647 | 1859463 | 1860482 |
| 2347 BPSS1502 |                  | 1998898 | 2001951 | 3064355 | 3061302 | 1212680 | 1215757 | 726405 | 729482 | 2122450 | 2125521 | 2064116 | 2067130 | 2073360 | 2076377 | 2032637 | 2035681 | 1860472 | 1863513 |
| 2348 BPSS1503 |                  | 2001981 | 2005001 | 3061272 | 3058252 | 1215835 | 1218855 | 729560 | 732580 | 2125551 | 2128571 | 2067163 | 2070183 | 2076407 | 2079427 | 2035711 | 2038731 | 1863573 | 1866593 |
| 2349 BPSS1504 | BURPS668_A2118   | 2005030 | 2007660 | 3058223 | 3055593 | 1218884 | 1221523 | 732609 | 735248 | 2128600 | 2131239 | 2070212 | 2072851 | 2079456 | 2082086 | 2038760 | 2041387 | 1866622 | 1869261 |
| 2350 BPSS1505 |                  | 2007681 | 2008742 | 3055572 | 3054511 | 1221544 | 1222605 | 735269 | 736330 | 2131260 | 2132321 | 2072872 | 2073933 | 2082107 | 2083168 | 2041408 | 2042469 | 1869282 | 1870343 |
| 2351 BPSS1506 |                  | 2008742 | 2009494 | 3054511 | 3053759 | 1222605 | 1223354 | 736330 | 737079 | 2132321 | 2133070 | 2073933 | 2074682 | 2083168 | 2083917 | 2042469 | 2043221 | 1870343 | 1871095 |
| 2352 BPSS1507 | BURPS668_A2118   | 2009526 | 2009915 | 3053727 | 3053338 | 1223386 | 1223775 | 737111 | 737500 | 2133102 | 2133491 | 2074714 | 2075103 | 2083949 | 2084338 | 2043253 | 2043642 | 1871127 | 1871516 |
| 2353 BPSS1508 |                  | 2010048 | 2010722 | 3053205 | 3052531 | 1223908 | 1224582 | 737633 | 738307 | 2133624 | 2134298 | 2075236 | 2075910 | 2084471 | 2085145 | 2043775 | 2044449 | 1871649 | 1872323 |
| 2354 BPSS1509 |                  | 2010722 | 2012152 | 3052531 | 3051101 | 1224582 | 1226012 | 738307 | 739737 | 2134298 | 2135728 | 2075910 | 2077340 | 2085145 | 2086575 | 2044449 | 2045879 | 1872323 | 1873753 |
| 2355 BPSS1510 | BURPS668_A2118   | 2012170 | 2012814 | 3051083 | 3050439 | 1226030 | 1226674 | 739755 | 740399 | 2135746 | 2136390 | 2077358 | 2078002 | 2086593 | 2087237 | 2045897 | 2046541 | 1873771 | 1874415 |
| 2356 BPSS1511 |                  | 2012829 | 2016830 | 3050424 | 3048994 | 1226689 | 1230681 | 740437 | 744405 | 2136405 | 2137019 | 2078017 | 2082000 | 2089100 | 2091334 | 2046556 | 2050521 | 1876242 | 1878476 |
| 2357          |                  | 2016849 | 2016998 |         |         |         |         |        |        |         |         |         |         |         |         |         |         |         |         |
| 2358          | BURPS668_A2139   |         |         |         |         |         |         |        |        |         |         | 2082000 | 2082155 |         |         |         |         |         |         |
| 2359 BPSS1512 | BURPS1106B_3141  | 2017927 | 2018778 | 3045168 | 3044317 | 1231786 | 1232637 | 745510 | 746361 | 2141669 | 2142520 | 2083060 | 2083908 | 2092479 | 2093330 | 2051697 | 2052548 | 1879602 | 1880450 |
| 2360          |                  |         |         | 3046246 | 3046097 |         |         |        |        |         |         |         |         |         |         |         |         |         |         |
| 2361 BPSS1513 |                  | 2018945 | 2019235 | 3044150 | 3043860 | 1232804 | 1233094 | 746528 | 746818 | 2142687 | 2142977 | 2084075 | 2084365 | 2093571 | 2093792 | 2052789 | 2053010 | 1880613 | 1880903 |
| 2362 BPSS1514 | BURPS668_A2147   | 2019243 | 2019872 | 3043852 | 3043223 | 1233102 | 1233731 | 746826 | 747455 | 2142985 | 2143614 | 2084373 | 2085002 | 2093800 | 2094429 | 2053018 | 2053647 | 1880911 | 1881540 |
| 2363          |                  |         |         |         |         |         |         |        |        |         |         | 2085578 | 2085754 |         |         |         |         |         |         |













|               |                  |         |         |         |         |         |         |         |         |         |         |         |         |         |         |         |         |         |         |
|---------------|------------------|---------|---------|---------|---------|---------|---------|---------|---------|---------|---------|---------|---------|---------|---------|---------|---------|---------|---------|
| 2712 BPSS1836 | BURPSPAST_AC0412 | 2452795 | 2451794 | 2610494 | 2611495 | 1669051 | 1668050 | 1182644 | 1181643 | 2570410 | 2569409 | 2526129 | 2525128 | 2527146 | 2526145 | 2479457 | 2478456 | 2298590 | 2297589 |
| 2713 BPSS1837 |                  | 2453929 | 2453375 | 2609360 | 2609914 | 1670185 | 1669631 | 1183778 | 1183224 | 2571544 | 2570990 | 2527262 | 2526708 | 2528280 | 2527726 | 2480591 | 2480037 | 2299724 | 2299170 |
| 2714 BPSS1838 |                  | 2455316 | 2453982 | 2607973 | 2609307 | 1671572 | 1670238 | 1185165 | 1183831 | 2572931 | 2571597 | 2528649 | 2527315 | 2529667 | 2528333 | 2481978 | 2480644 | 2301111 | 2299777 |
| 2715 BPSS1839 |                  | 2455850 | 2455431 | 2607439 | 2607858 | 1672106 | 1671687 | 1185699 | 1185280 | 2573463 | 2573044 | 2529181 | 2528762 | 2530201 | 2529782 | 2482512 | 2482093 | 2301641 | 2301222 |
| 2716 BPSS1840 |                  | 2457155 | 2456124 | 2606134 | 2607165 | 1673411 | 1672380 | 1187004 | 1185973 | 2574768 | 2573737 | 2530486 | 2529455 | 2531512 | 2530475 | 2483817 | 2482786 | 2302946 | 2301915 |
| 2717 BPSS1841 |                  | 2458967 | 2457702 | 2604322 | 2605587 | 1675252 | 1673987 | 1188845 | 1187580 | 2576609 | 2575344 | 2532313 | 2531048 | 2533360 | 2532095 | 2485643 | 2484378 | 2304759 | 2303494 |
| 2718 BPSS1842 |                  | 2459503 | 2458967 | 2603786 | 2604322 | 1675788 | 1675252 | 1189381 | 1188845 | 2577145 | 2576609 | 2532849 | 2532313 | 2533896 | 2533360 | 2486179 | 2485643 | 2305295 | 2304759 |
| 2719 BPSS1843 |                  | 2459938 | 2459528 | 2603351 | 2603761 | 1676223 | 1675813 | 1189816 | 1189406 | 2577580 | 2577170 | 2533284 | 2532874 | 2534331 | 2533921 | 2486614 | 2486204 | 2305730 | 2305320 |
| 2720 BPSS1844 |                  | 2460458 | 2460108 | 2602831 | 2603181 | 1676742 | 1676392 | 1190335 | 1189985 | 2578100 | 2577750 | 2533804 | 2533454 | 2534850 | 2534500 | 2487133 | 2486783 | 2306249 | 2305899 |
| 2721 BPSS1845 |                  | 2460820 | 2462691 | 2602469 | 2600598 | 1677112 | 1678983 | 1190705 | 1192576 | 2578461 | 2580332 | 2534166 | 2536037 | 2535220 | 2537091 | 2487558 | 2489429 | 2306635 | 2308506 |
| 2722 BPSS1846 |                  | 2463484 | 2463861 | 2599805 | 2599428 | 1679775 | 1680152 | 1193368 | 1193745 | 2581125 | 2581502 | 2536827 | 2537204 | 2537883 | 2538260 | 2490221 | 2490598 | 2309299 | 2309676 |
| 2723 BPSS1847 |                  | 2463913 | 2464494 | 2599376 | 2598795 | 1680204 | 1680785 | 1193797 | 1194378 | 2581554 | 2582135 | 2537256 | 2537837 | 2538312 | 2538893 | 2490650 | 2491231 | 2309728 | 2310309 |
| 2724 BPSS1848 |                  | 2464689 | 2465780 | 2598600 | 2597509 | 1680980 | 1682071 | 1194573 | 1195664 | 2582330 | 2583421 | 2538032 | 2539123 | 2539088 | 2540179 | 2491426 | 2492517 | 2310504 | 2311595 |
| 2725 BPSS1849 |                  | 2466475 | 2466002 | 2596814 | 2597287 | 1682766 | 1682293 | 1196359 | 1195886 | 2584104 | 2583631 | 2539818 | 2539345 | 2540874 | 2540401 | 2493199 | 2492726 | 2312289 | 2311816 |
| 2726 BPSS1850 |                  | 2468696 | 2466603 | 2594593 | 2596686 | 1684987 | 1682894 | 1198580 | 1196487 | 2586325 | 2584232 | 2542034 | 2539941 | 2543095 | 2541002 | 2495420 | 2493327 | 2314511 | 2312418 |
| 2727 BPSS1851 |                  | 2469163 | 2470365 | 2594126 | 2592924 | 1685454 | 1686656 | 1199047 | 1200249 | 2586792 | 2587994 | 2542501 | 2543703 | 2543562 | 2544764 | 2495887 | 2497089 | 2314978 | 2316180 |
| 2728          |                  |         |         |         |         |         |         |         |         |         |         |         |         | 2544789 | 2545112 |         |         |         |         |
| 2729 BPSS1852 |                  | 2472070 | 2471057 | 2591219 | 2592232 | 1688352 | 1687339 | 1201945 | 1200932 | 2589679 | 2588666 | 2545417 | 2544404 | 2546504 | 2545491 | 2498741 | 2497728 | 2317866 | 2316853 |
| 2730 BPSS1853 |                  | 2473215 | 2472421 | 2590074 | 2590868 | 1689420 | 1688626 | 1203013 | 1202219 | 2590782 | 2589988 | 2546537 | 2545743 | 2547593 | 2546799 | 2499966 | 2499172 | 2318962 | 2318168 |
| 2731 BPSS1854 |                  | 2474225 | 2473458 | 2589064 | 2589831 | 1690414 | 1689647 | 1204007 | 1203240 | 2591776 | 2591009 | 2547559 | 2546792 | 2548608 | 2547841 | 2500981 | 2500214 | 2319979 | 2319212 |
| 2732 BPSS1855 |                  | 2474948 | 2474262 | 2588341 | 2589027 | 1691137 | 1690451 | 1204730 | 1204044 | 2592499 | 2591813 | 2548282 | 2547596 | 2549331 | 2548645 | 2501704 | 2501018 | 2320702 | 2320016 |
| 2733 BPSS1856 |                  | 2476021 | 2474948 | 2587268 | 2588341 | 1692210 | 1691137 | 1205803 | 1204730 | 2593572 | 2592499 | 2549355 | 2548282 | 2550404 | 2549331 | 2502777 | 2501704 | 2321775 | 2320702 |
| 2734 BPSS1857 |                  | 2477250 | 2476021 | 2586039 | 2587268 | 1693439 | 1692210 | 1207032 | 1205803 | 2594801 | 2593572 | 2550584 | 2549355 | 2551633 | 2550404 | 2504006 | 2502777 | 2323004 | 2321775 |
| 2735 BPSS1858 |                  | 2477656 | 2478579 | 2585619 | 2584696 | 1693775 | 1694698 | 1207368 | 1208291 | 2595080 | 2596003 | 2550799 | 2551722 | 2551849 | 2552772 | 2504375 | 2505298 | 2323369 | 2324292 |
| 2736 BPSS1859 |                  | 2478674 | 2479072 | 2584601 | 2584203 | 1694793 | 1695191 | 1208386 | 1208784 | 2596098 | 2596496 | 2551817 | 2552215 | 2552867 | 2553265 | 2505393 | 2505791 | 2324387 | 2324785 |
| 2737 BPSS1860 |                  | 2480400 | 2479216 | 2582875 | 2584059 | 1696521 | 1695337 | 1210114 | 1208930 | 2597817 | 2596642 | 2553544 | 2552360 | 2554595 | 2553411 | 2507119 | 2505935 | 2326113 | 2324929 |
| 2738          | BURPS1655_D1275  |         |         |         |         |         |         |         |         |         |         |         |         |         |         |         |         | 2326339 | 2326851 |
| 2739          | BURPS1710A_A1802 |         |         |         |         | 1696747 | 1697226 |         |         |         |         |         |         |         |         |         |         |         |         |
| 2740          | BURPS1710B_A0951 |         |         |         |         |         |         | 1210340 | 1210819 |         |         |         |         |         |         |         |         |         |         |
| 2741 BPSS1861 | BURPS1106B_2654  | 2482206 | 2481328 | 2581069 | 2581947 | 1698294 | 1697416 | 1211887 | 1211009 | 2599591 | 2598713 | 2555325 | 2554447 | 2556379 | 2555501 | 2508915 | 2508037 | 2327919 | 2327041 |
| 2742          |                  |         |         | 2582649 | 2582137 |         |         |         |         |         |         |         |         |         |         |         |         |         |         |
| 2743 BPSS1862 |                  | 2482888 | 2484894 | 2580387 | 2578381 | 1698976 | 1700982 | 1212569 | 1214575 | 2600273 | 2602279 | 2556016 | 2558022 | 2557079 | 2559085 | 2509620 | 2511626 | 2328619 | 2330625 |
| 2744 BPSS1863 |                  | 2485960 | 2485235 | 2577315 | 2578040 | 1702048 | 1701323 | 1215641 | 1214916 | 2603349 | 2602624 | 2559068 | 2558343 | 2560151 | 2559426 | 2512671 | 2511946 | 2331692 | 2330967 |
| 2745 BPSS1864 |                  | 2486039 | 2487076 | 2577236 | 2576199 | 1702127 | 1703164 | 1215720 | 1216757 | 2603428 | 2604465 | 2559147 | 2560199 | 2560230 | 2561267 | 2512750 | 2513787 | 2331771 | 2332823 |
| 2746 BPSS1865 |                  | 2487659 | 2488696 | 2575616 | 2574579 | 1703663 | 1704700 | 1217256 | 1218293 | 2604970 | 2606007 | 2560642 | 2561679 | 2561736 | 2562773 | 2514398 | 2515435 | 2333346 | 2334383 |
| 2747 BPSS1866 |                  | 2489162 | 2489815 | 2574113 | 2573460 | 1705167 | 1705820 | 1218760 | 1219413 | 2606488 | 2607141 | 2562129 | 2562782 | 2563254 | 2563907 | 2515951 | 2516604 | 2334849 | 2335472 |
| 2748 BPSS1867 |                  | 2490672 | 2491613 | 2572603 | 2571662 | 1706678 | 1707619 | 1220271 | 1221212 | 2607999 | 2608940 | 2563640 | 2564584 | 2564765 | 2565706 | 2517462 | 2518403 | 2336338 | 2337279 |
| 2749 BPSS1868 | BURPSS13_X0677   | 2493102 | 2491822 | 2570173 | 2571453 | 1709118 | 1707838 | 1222711 | 1221431 | 2610439 | 2609159 | 2566073 | 2564793 | 2567205 | 2565925 | 2519892 | 2518612 | 2338768 | 2337488 |
| 2750          |                  |         |         |         |         |         |         |         |         |         |         |         |         |         |         | 2520054 | 2520203 |         |         |
| 2751 BPSS1869 |                  | 2494498 | 2493467 | 2568777 | 2569808 | 1710586 | 1709519 | 1224179 | 1223112 | 2611847 | 2610780 | 2566896 | 2566402 | 2568625 | 2567558 | 2521312 | 2520245 | 2340167 | 2339109 |
| 2752          |                  |         |         | 2570020 | 2569850 |         |         |         |         |         |         |         |         |         |         |         |         |         |         |
| 2753 BPSS1870 | BURPS1106B_2640  | 2495573 | 2494548 | 2567702 | 2568727 | 1711641 | 1710616 | 1225234 | 1224209 | 2612899 | 2611877 | 2568437 | 2567412 | 2569632 | 2568655 | 2522367 | 2521342 | 2341223 | 2340198 |
| 2754 BPSS1871 |                  | 2498174 | 2495583 | 2565101 | 2567692 | 1714242 | 1711651 | 1227835 | 1225244 | 2615500 | 2612909 | 2571038 | 2568447 | 2571663 | 2569642 | 2524968 | 2522377 | 2343824 | 2341233 |
| 2755 BPSS1872 |                  | 2498905 | 2498174 | 2564370 | 2565101 | 1714973 | 1714242 | 1228566 | 1227835 | 2616231 | 2615500 | 2571775 | 2571038 | 2572920 | 2572189 | 2525699 | 2524968 | 2344555 | 2343824 |
| 2756 BPSS1873 |                  | 2500940 | 2498889 | 2562335 | 2564386 | 1717008 | 1714957 | 1230601 | 1228550 | 2617698 | 2616796 | 2573810 | 2571759 | 2574953 | 2573550 | 2527716 | 2525683 | 2346429 | 2345431 |
| 2757 BPSS1874 |                  | 2501479 | 2500940 | 2561796 | 2562335 | 1717547 | 1717008 | 1231140 | 1230601 | 2618237 | 2617698 | 2574349 | 2573810 | 2575492 | 2574953 | 2528255 | 2527716 | 2346968 | 2346429 |
| 2758 BPSS1875 |                  | 2503166 | 2501493 | 2560109 | 2561782 | 1719234 | 1717561 | 1232827 | 1231154 | 2619924 | 2618251 | 2576036 | 2574363 | 2577179 | 2575506 | 2529942 | 2528629 | 2348655 | 2346982 |
| 2759 BPSS1876 |                  | 2504434 | 2503340 | 2558841 | 2559935 | 1720502 | 1719408 | 1234095 | 1233001 | 2621193 | 2620099 | 2577304 | 2576210 | 2578447 | 2577353 | 2531210 | 2530116 | 2349923 | 2348829 |
| 2760 BPSS1877 |                  | 2505250 | 2505588 | 2558025 | 2557687 | 1721318 | 1721668 | 1234911 | 1235261 | 2622009 | 2622347 | 2578109 | 2578447 | 2579263 | 2579613 | 2532026 | 2532376 | 2350739 | 2351077 |
| 2761 BPSS1878 |                  | 2507304 | 2505874 | 2555971 | 2557401 | 1723384 | 1721954 | 1236977 | 1235547 | 2624063 | 2622633 | 2580138 | 2578708 | 2581329 | 2579899 | 2534092 | 2532662 | 2352793 | 2351363 |
| 2762 BPSS1879 |                  | 2509025 | 2507388 | 2554250 | 2555887 | 1725116 | 1723479 | 1238709 | 1237072 | 2625795 | 2624158 | 2581870 | 2580233 | 2583061 | 2581424 | 2535825 | 2535505 | 2354525 | 2352888 |
| 2763 BPSS1880 |                  | 2510952 | 2509336 | 2552323 | 2553939 | 1727042 | 1725426 | 1240635 | 1239019 | 2627722 | 2626106 | 2583797 | 2582181 | 2584987 | 2583371 | 2537752 | 2536136 | 2356452 | 2354836 |
| 2764          |                  |         |         |         |         |         |         |         |         |         |         |         |         |         |         |         |         | 2356637 | 2356473 |
| 2765          | BURPS406E_D0445  |         |         |         |         |         |         |         |         | 2627907 | 2627743 |         |         |         |         |         |         |         |         |
| 2766          | BURPSPAST_AC0368 |         |         |         |         |         |         |         |         |         |         |         |         | 2585157 | 2585008 |         |         |         |         |
| 2767 BPSS1881 | BURPS1106B_2622  | 2512399 | 2511116 | 2550876 | 2552159 | 1728449 | 1727166 | 1242042 | 1240759 | 2629169 | 2627886 | 2585204 | 2583921 | 2586419 | 2585136 | 253915  |         |         |         |

|               |                   |         |         |         |         |         |         |         |         |         |         |         |         |         |         |         |         |         |         |
|---------------|-------------------|---------|---------|---------|---------|---------|---------|---------|---------|---------|---------|---------|---------|---------|---------|---------|---------|---------|---------|
| 2770 BPSS1883 | BURPS1710A_A1855  | 2513143 | 2514792 | 2550132 | 2548483 | 1729193 | 1730842 | 1242786 | 1244435 | 2629910 | 2631559 | 2585949 | 2587598 | 2587160 | 2588809 | 2539904 | 2541568 | 2358644 | 2360293 |
| 2771 BPSS1884 |                   | 2515281 | 2514865 | 2547994 | 2548410 | 1731331 | 1730915 | 1244924 | 1244508 | 2632048 | 2631632 | 2588087 | 2587671 | 2589298 | 2588882 | 2542057 | 2541641 | 2360782 | 2360366 |
| 2772 BPSS1885 |                   | 2516724 | 2515486 | 2546551 | 2547789 | 1732772 | 1731534 | 1246365 | 1245127 | 2633491 | 2632253 | 2589528 | 2588290 | 2590741 | 2589503 | 2543500 | 2542262 | 2362225 | 2360987 |
| 2773 BPSS1886 |                   | 2517040 | 2516714 | 2546235 | 2546561 | 1733088 | 1732762 | 1246681 | 1246355 | 2633807 | 2633481 | 2589844 | 2589518 | 2591057 | 2590731 | 2543816 | 2543490 | 2362541 | 2362215 |
| 2774 BPSS1887 |                   | 2517577 | 2517065 | 2545698 | 2546210 | 1733625 | 1733113 | 1247218 | 1246706 | 2634344 | 2633832 | 2590381 | 2589869 | 2591594 | 2591082 | 2544353 | 2543841 | 2363078 | 2362566 |
| 2775 BPSS1888 |                   | 2518830 | 2517577 | 2544445 | 2545698 | 1734878 | 1733625 | 1248471 | 1247218 | 2635597 | 2634344 | 2591634 | 2590381 | 2592844 | 2591594 | 2545606 | 2544353 | 2364331 | 2363078 |
| 2776 BPSS1889 |                   | 2519030 | 2520067 | 2544245 | 2543208 | 1735078 | 1736115 | 1248671 | 1249708 | 2635797 | 2636834 | 2591856 | 2592872 | 2593047 | 2594084 | 2545806 | 2546843 | 2364531 | 2364554 |
| 2777 BPSS1890 |                   | 2521028 | 2520144 | 2542247 | 2543131 | 1737076 | 1736192 | 1250669 | 1249785 | 2637795 | 2636911 | 2593833 | 2592949 | 2595024 | 2594140 | 2547804 | 2546920 | 2366530 | 2365646 |
| 2778 BPSS1891 |                   | 2521118 | 2522248 | 2542157 | 2541027 | 1737166 | 1738296 | 1250759 | 1251889 | 2637885 | 2639015 | 2593923 | 2595053 | 2595114 | 2596244 | 2547894 | 2549024 | 2366620 | 2367750 |
| 2779 BPSS1892 |                   | 2522286 | 2523185 | 2540989 | 2540090 | 1738334 | 1739233 | 1251927 | 1252826 | 2639053 | 2639952 | 2595091 | 2595990 | 2596282 | 2597181 | 2549062 | 2549961 | 2367788 | 2368687 |
| 2780 BPSS1893 |                   | 2523226 | 2523513 | 2540049 | 2539762 | 1739274 | 1739561 | 1252867 | 1253154 | 2639993 | 2640280 | 2596031 | 2596318 | 2597222 | 2597509 | 2550002 | 2550289 | 2368728 | 2369015 |
| 2781 BPSS1894 |                   | 2523968 | 2523639 | 2539307 | 2539636 | 1740016 | 1739687 | 1253609 | 1253280 | 2640735 | 2640406 | 2596773 | 2596444 | 2597964 | 2597635 | 2550744 | 2550415 | 2369470 | 2369141 |
| 2782 BPSS1895 |                   | 2524562 | 2523972 | 2538713 | 2539303 | 1740610 | 1740020 | 1254203 | 1253613 | 2641329 | 2640739 | 2597367 | 2596777 | 2598558 | 2597968 | 2551338 | 2550748 | 2370064 | 2369474 |
| 2783 BPSS1896 |                   | 2526589 | 2524580 | 2536686 | 2538695 | 1742631 | 1740628 | 1256224 | 1254221 | 2643350 | 2641347 | 2599388 | 2597385 | 2600579 | 2598576 | 2553365 | 2551356 | 2372085 | 2370082 |
| 2784 BPSS1897 |                   | 2527480 | 2526596 | 2535795 | 2536679 | 1743522 | 1742638 | 1257115 | 1256231 | 2644241 | 2643357 | 2600279 | 2599395 | 2601470 | 2600586 | 2554255 | 2553371 | 2372976 | 2372092 |
| 2785          |                   |         |         |         |         | 1744124 | 1744294 |         |         |         |         |         |         |         |         |         |         |         |         |
| 2786 BPSS1898 |                   | 2530255 | 2528225 | 2533020 | 2535050 | 1746297 | 1744267 | 1259890 | 1257860 | 2647016 | 2644986 | 2603081 | 2601051 | 2604245 | 2602215 | 2557035 | 2555505 | 2375745 | 2373715 |
| 2787 BPSS1899 |                   | 2530405 | 2531454 | 2532870 | 2531821 | 1746447 | 1747496 | 1260040 | 1261089 | 2647166 | 2648215 | 2603231 | 2604280 | 2604395 | 2605444 | 2557185 | 2558234 | 2375895 | 2376944 |
| 2788 BPSS1900 |                   | 2532358 | 2531414 | 2530917 | 2531861 | 1748400 | 1747456 | 1261993 | 1261049 | 2649119 | 2648175 | 2605184 | 2604240 | 2606348 | 2605404 | 2559138 | 2558194 | 2377848 | 2376904 |
| 2789 BPSS1901 |                   | 2532453 | 2533448 | 2530822 | 2529827 | 1748495 | 1749493 | 1262088 | 1263086 | 2649214 | 2650209 | 2605279 | 2606274 | 2606443 | 2607441 | 2559233 | 2560228 | 2377943 | 2378941 |
| 2790 BPSS1902 |                   | 2534544 | 2533633 | 2528731 | 2529642 | 1750589 | 1749678 | 1264182 | 1263271 | 2651305 | 2650394 | 2607369 | 2606458 | 2608537 | 2607626 | 2561324 | 2560413 | 2380037 | 2379126 |
| 2791 BPSS1903 |                   | 2534768 | 2536132 | 2528507 | 2527143 | 1750813 | 1752177 | 1264406 | 1265770 | 2651529 | 2652893 | 2607593 | 2608957 | 2608761 | 2610125 | 2561548 | 2562912 | 2380261 | 2381625 |
| 2792 BPSS1904 |                   | 2536132 | 2536620 | 2527143 | 2526655 | 1752177 | 1752665 | 1265770 | 1266258 | 2652893 | 2653381 | 2608957 | 2609445 | 2610125 | 2610613 | 2562912 | 2563400 | 2381625 | 2382113 |
| 2793 BPSS1905 |                   | 2536667 | 2537683 | 2526608 | 2525592 | 1752712 | 1753728 | 1266305 | 1267321 | 2653428 | 2654444 | 2609492 | 2610508 | 2610660 | 2611676 | 2563447 | 2564463 | 2382160 | 2383176 |
| 2794 BPSS1906 |                   | 2537683 | 2538474 | 2525592 | 2524801 | 1753728 | 1754519 | 1267321 | 1268112 | 2654444 | 2655235 | 2610508 | 2611299 | 2611676 | 2612467 | 2564463 | 2565254 | 2383176 | 2383967 |
| 2795 BPSS1907 |                   | 2539399 | 2538524 | 2523876 | 2524751 | 1755444 | 1754569 | 1269037 | 1268162 | 2656160 | 2655285 | 2612224 | 2611349 | 2613392 | 2612517 | 2566179 | 2565304 | 2384892 | 2384017 |
| 2796 BPSS1908 |                   | 2539802 | 2540284 | 2523473 | 2522991 | 1755857 | 1756339 | 1269450 | 1269932 | 2656573 | 2657055 | 2612637 | 2613119 | 2613805 | 2614287 | 2566592 | 2567074 | 2385305 | 2385787 |
| 2797 BPSS1909 |                   | 2540284 | 2540853 | 2522991 | 2522422 | 1756339 | 1756908 | 1269932 | 1270501 | 2657055 | 2657624 | 2613119 | 2613688 | 2614287 | 2614856 | 2567074 | 2567643 | 2385787 | 2386356 |
| 2798 BPSS1910 |                   | 2540879 | 2541928 | 2522396 | 2521347 | 1756934 | 1757983 | 1270527 | 1271576 | 2657650 | 2658117 | 2613714 | 2614763 | 2614882 | 2615931 | 2567669 | 2568718 | 2386382 | 2387431 |
| 2799 BPSS1911 |                   | 2542558 | 2544039 | 2520717 | 2519236 | 1758602 | 1760083 | 1272195 | 1273676 | 2659384 | 2660865 | 2615382 | 2616863 | 2616550 | 2618031 | 2569348 | 2570829 | 2388042 | 2389523 |
| 2800 BPSS1912 |                   |         |         |         |         |         |         |         |         |         |         |         |         |         |         | 2571003 | 2572307 |         |         |
| 2801 BPSS1913 | Bp_chr2_11_ISBma1 | 2545852 | 2544293 | 2517416 | 2518975 | 1761903 | 1760344 | 1275496 | 1273937 | 2662699 | 2661140 | 2618648 | 2617089 | 2619851 | 2618292 | 2573955 | 2572396 | 2391336 | 2389777 |
| 2802          | Bp_chr2_12_ISBma2 |         |         |         |         |         |         |         |         |         |         |         |         | 2620446 | 2622018 |         |         |         |         |
| 2803 BPSS1914 | 2547424           | 2546537 | 2515844 | 2516731 | 1763433 | 1762546 | 1277026 | 1276139 | 2664229 | 2663342 | 2620178 | 2619291 | 2622977 | 2622090 | 2575485 | 2574598 | 2392880 | 2391993 |         |
| 2804 BPSS1915 | 2548138           | 2549514 | 2515130 | 2513754 | 1764147 | 1765523 | 1277740 | 1279116 | 2664943 | 2666319 | 2620892 | 2622268 | 2623691 | 2625067 | 2576199 | 2577575 | 2393592 | 2394968 |         |
| 2805 BPSS1916 | 2550857           | 2550114 | 2512411 | 2513154 | 1766865 | 1766122 | 1280458 | 1279715 | 2667661 | 2666918 | 2623618 | 2622875 | 2626410 | 2625667 | 2578926 | 2578183 | 2396318 | 2395575 |         |
| 2806 BPSS1917 | 2551522           | 2552301 | 2511746 | 2510967 | 1767530 | 1768309 | 1281123 | 1281902 | 2668326 | 2669105 | 2624283 | 2625062 | 2627075 | 2627854 | 2579591 | 2580370 | 2396983 | 2397762 |         |
| 2807 BPSS1918 | 2553496           | 2552513 | 2509772 | 2510755 | 1769504 | 1768521 | 1283097 | 1282114 | 2670300 | 2669317 | 2626257 | 2625274 | 2629049 | 2628066 | 2581565 | 2580582 | 2398957 | 2397974 |         |
| 2808 BPSS1919 | 2553723           | 2553499 | 2509545 | 2509769 | 1769731 | 1769507 | 1283324 | 1283100 | 2670527 | 2670303 | 2626484 | 2626260 | 2629276 | 2629052 | 2581792 | 2581568 | 2399184 | 2398960 |         |
| 2809 BPSS1920 | 2554468           | 2554893 | 2508800 | 2508375 | 1770483 | 1770908 | 1284076 | 1284501 | 2671279 | 2671704 | 2627243 | 2627668 | 2630021 | 2630446 | 2582530 | 2582955 | 2399915 | 2400340 |         |
| 2810 BPSS1921 | 2555629           | 2555309 | 2507639 | 2507959 | 1771608 | 1771288 | 1285201 | 1284881 | 2672424 | 2672104 | 2628375 | 2628055 | 2631182 | 2630862 | 2583663 | 2583343 | 2401060 | 2400740 |         |
| 2811 BPSS1922 | 2555978           | 2556853 | 2507290 | 2506415 | 1771957 | 1772832 | 1285550 | 1286425 | 2672773 | 2673648 | 2628724 | 2629599 | 2631531 | 2632406 | 2584012 | 2584887 | 2401415 | 2402290 |         |
| 2812 BPSS1923 | 2557183           | 2557569 | 2506085 | 2505699 | 1773161 | 1773547 | 1286754 | 1287140 | 2673989 | 2674375 | 2629950 | 2630336 | 2632736 | 2633122 | 2585228 | 2585614 | 2402630 | 2403016 |         |
| 2813 BPSS1924 | 2558813           | 2558166 | 2504455 | 2505102 | 1774802 | 1774155 | 1288395 | 1287748 | 2675610 | 2674963 | 2631590 | 2630943 | 2634366 | 2633719 | 2586849 | 2586620 | 2404271 | 2403624 |         |
| 2814 BPSS1925 | 2560443           | 2559268 | 2502825 | 2504000 | 1776339 | 1775164 | 1289932 | 1288757 | 2677117 | 2675966 | 2633175 | 2631988 | 2636003 | 2634828 | 2588349 | 2587198 | 2405790 | 2404615 |         |
| 2815 BPSS1926 | 2561385           | 2560744 | 2501883 | 2502524 | 1777281 | 1776640 | 1290874 | 1290233 | 2678059 | 2677418 | 2634117 | 2633476 | 2636945 | 2636304 | 2589291 | 2588650 | 2406732 | 2406091 |         |
| 2816          |                   |         |         |         |         |         | 1292787 | 1294640 |         |         |         |         |         |         |         |         |         |         |         |
| 2817 BPSS1927 | 2563317           | 2561629 | 2499951 | 2501639 | 1779213 | 1777525 | 1292806 | 1291118 | 2679991 | 2678303 | 2636049 | 2634361 | 2638877 | 2637189 | 2591223 | 2589535 | 2408664 | 2406976 |         |
| 2818 BPSS1928 | 2564208           | 2565146 | 2499060 | 2498122 | 1780106 | 1781044 | 1293699 | 1294637 | 2680883 | 2681821 | 2636940 | 2637878 | 2639767 | 2640705 | 2592114 | 2593052 | 2409554 | 2410492 |         |
| 2819 BPSS1929 | 2566668           | 2565187 | 2496600 | 2498081 | 1782566 | 1781085 | 1296159 | 1294678 | 2683343 | 2681862 | 2639400 | 2637919 | 2642227 | 2640746 | 2594574 | 2593039 | 2412014 | 2410533 |         |
| 2820 BPSS1930 | 2567731           | 2566649 | 2495537 | 2496619 | 1783629 | 1782547 | 1297222 | 1296140 | 2684406 | 2683324 | 2640463 | 2639381 | 2643296 | 2642208 | 2595637 | 2594555 | 2413077 | 2411995 |         |
| 2821 BPSS1931 | 2568426           | 2567731 | 2494842 | 2495537 | 1784324 | 1783629 | 1297917 | 1297222 | 2685101 | 2684406 | 2641158 | 2640463 | 2643991 | 2643296 | 2596332 | 2595637 | 2413772 | 2413077 |         |
| 2822 BPSS1932 | 2569565           | 2568432 | 2493703 | 2494836 | 1785463 | 1784330 | 1299056 | 1297923 | 2686240 | 2685107 | 2642297 | 2641164 | 2645130 | 2643997 | 2597471 | 2596338 |         |         |         |

|               |                 |         |         |         |         |         |         |         |         |         |         |         |         |         |         |         |         |         |         |
|---------------|-----------------|---------|---------|---------|---------|---------|---------|---------|---------|---------|---------|---------|---------|---------|---------|---------|---------|---------|---------|
| 2828 BPSS1938 | BURPS406E_D0353 | 2574285 | 2577482 | 2488983 | 2485786 | 1790176 | 1791957 | 1303769 | 1307014 | 2690960 | 2694205 | 2647017 | 2650283 | 2649829 | 2653086 | 2602191 | 2605436 | 2419631 | 2422885 |
| 2829 BPSS1939 |                 | 2577488 | 2578609 | 2485780 | 2484659 | 1793428 | 1794549 | 1307020 | 1308141 | 2694211 | 2695332 | 2650289 | 2651410 | 2653092 | 2654213 | 2605442 | 2606563 | 2422891 | 2424012 |
| 2830 BPSS1940 |                 | 2578762 | 2580594 | 2484506 | 2482674 | 1794702 | 1796534 | 1308294 | 1310126 | 2695485 | 2697317 | 2651563 | 2653395 | 2654366 | 2656198 | 2606716 | 2608548 | 2424165 | 2425997 |
| 2831 BPSS1941 |                 | 2582500 | 2580938 | 2480768 | 2482330 | 1798434 | 1796872 | 1312026 | 1310464 | 2699253 | 2697691 | 2655331 | 2653769 | 2658128 | 2656566 | 2610490 | 2608928 | 2427939 | 2426377 |
| 2832 BPSS1942 |                 | 2583041 | 2583547 | 2480227 | 2479721 | 1798975 | 1799481 | 1312567 | 1313073 | 2699794 | 2700300 | 2655872 | 2656378 | 2658669 | 2659175 | 2611031 | 2611537 | 2428480 | 2428986 |
| 2833 BPSS1943 |                 | 2584111 | 2583611 | 2479157 | 2479657 | 1800045 | 1799545 | 1313637 | 1313137 | 2700864 | 2700364 | 2656942 | 2656442 | 2659739 | 2659239 | 2612101 | 2611601 | 2429550 | 2429050 |
| 2834 BPSS1944 |                 | 2585213 | 2584191 | 2478055 | 2479077 | 1801130 | 1800108 | 1314722 | 1313700 | 2701966 | 2700944 | 2658044 | 2657022 | 2660841 | 2659819 | 2613203 | 2612181 | 2430652 | 2429630 |
| 2835          |                 |         |         |         |         |         |         |         |         | 2702200 | 2702036 |         |         |         |         |         |         |         |         |
| 2836 BPSS1945 |                 | 2586320 | 2585475 | 2476948 | 2477793 | 1802213 | 1801368 | 1315805 | 1314960 | 2702928 | 2702200 | 2659095 | 2658250 | 2661916 | 2661071 | 2614246 | 2613401 | 2431715 | 2430870 |
| 2837          |                 |         |         | 2477793 | 2478014 |         |         |         |         |         |         |         |         |         |         |         |         |         |         |
| 2838 BPSS1946 |                 | 2588317 | 2586320 | 2474951 | 2476948 | 1804204 | 1802213 | 1317796 | 1315805 | 2705045 | 2703054 | 2661104 | 2659095 | 2663913 | 2661916 | 2616231 | 2614246 | 2433712 | 2431718 |
| 2839 BPSS1947 |                 | 2589050 | 2588304 | 2474218 | 2474964 | 1804937 | 1804191 | 1318529 | 1317783 | 2705778 | 2705032 | 2661837 | 2661091 | 2664646 | 2663900 | 2616964 | 2616218 | 2434445 | 2433699 |
| 2840 BPSS1948 |                 | 2589312 | 2589067 | 2473956 | 2474201 | 1805199 | 1804954 | 1318791 | 1318546 | 2706040 | 2705795 | 2662099 | 2661854 | 2664908 | 2664663 | 2617226 | 2616981 | 2434707 | 2434462 |
| 2841 BPSS1949 |                 | 2590010 | 2589312 | 2473258 | 2473956 | 1805897 | 1805199 | 1319489 | 1318791 | 2706738 | 2706040 | 2662797 | 2662099 | 2665606 | 2664908 | 2617924 | 2617226 | 2435405 | 2434707 |
| 2842 BPSS1950 |                 | 2590306 | 2590010 | 2472962 | 2473258 | 1806193 | 1805897 | 1319785 | 1319489 | 2707034 | 2706738 | 2663093 | 2662797 | 2665902 | 2665606 | 2618220 | 2617924 | 2435701 | 2435405 |
| 2843 BPSS1951 |                 | 2590784 | 2590311 | 2472484 | 2472957 | 1806656 | 1806198 | 1320248 | 1319790 | 2707497 | 2707039 | 2663571 | 2663098 | 2666380 | 2665907 | 2618799 | 2618752 | 2436164 | 2435706 |
| 2844 BPSS1952 |                 | 2591260 | 2590808 | 2472008 | 2472460 | 1807138 | 1806686 | 1320730 | 1320278 | 2707979 | 2707527 | 2664047 | 2663595 | 2666856 | 2666404 | 2619275 | 2618823 | 2436646 | 2436194 |
| 2845 BPSS1953 |                 | 2592773 | 2591253 | 2470495 | 2472015 | 1808651 | 1807131 | 1322243 | 1320723 | 2709540 | 2707972 | 2665560 | 2664040 | 2668369 | 2666849 | 2620788 | 2619268 | 2438171 | 2436639 |
| 2846 BPSS1954 |                 | 2593197 | 2594987 | 2470071 | 2468281 | 1809075 | 1810865 | 1322667 | 1324457 | 2709964 | 2711754 | 2666002 | 2667792 | 2668793 | 2670583 | 2621212 | 2623002 | 2438613 | 2440403 |
| 2847 BPSS1955 |                 | 2595001 | 2596401 | 2468267 | 2466867 | 1810879 | 1812279 | 1324471 | 1325871 | 2711768 | 2713168 | 2667806 | 2669206 | 2670597 | 2671997 | 2623016 | 2624416 | 2440417 | 2441817 |
| 2848 BPSS1956 |                 | 2596401 | 2597576 | 2466867 | 2465692 | 1812279 | 1813454 | 1325871 | 1327046 | 2713168 | 2714343 | 2669206 | 2670381 | 2671997 | 2673172 | 2624416 | 2625591 | 2441817 | 2442992 |
| 2849 BPSS1957 |                 | 2599248 | 2598310 | 2464020 | 2464958 | 1815128 | 1814190 | 1328720 | 1327782 | 2715997 | 2715059 | 2672128 | 2671190 | 2674653 | 2673715 | 2627265 | 2626327 | 2444473 | 2443535 |
| 2850          | BURPS1106B_2517 |         |         | 2464958 | 2465383 |         |         |         |         |         |         |         |         |         |         |         |         |         |         |
| 2851          | BURPS406E_D0336 |         |         |         |         |         |         |         |         | 2716996 | 2717655 |         |         |         |         |         |         |         |         |
| 2852 BPSS1958 | 2600297         | 2599653 | 2462971 | 2463615 | 1816275 | 1815631 | 1329860 | 1329216 | 2717018 | 2716374 | 2673177 | 2672533 | 2675632 | 2674988 | 2628300 | 2627656 | 2445564 | 2444920 |         |
| 2853 BPSS1959 | 2601259         | 2600870 | 2461991 | 2462380 | 1817247 | 1816858 | 1330832 | 1330443 | 2718035 | 2717646 | 2674221 | 2673832 | 2676621 | 2676232 | 2629289 | 2628900 | 2446571 | 2446182 |         |
| 2854          | BURPS406E_D0335 |         |         |         |         |         |         |         |         | 2718316 | 2718032 |         |         |         |         |         |         |         |         |
| 2855          | BURPS13_X0801   |         |         |         |         |         |         |         |         |         |         |         |         |         |         | 2629609 | 2629286 |         |         |
| 2856 BPSS1960 | 2602890         | 2601562 | 2460360 | 2461688 | 1818887 | 1817559 | 1332472 | 1331144 | 2719641 | 2718316 | 2675899 | 2674571 | 2678253 | 2676925 | 2630937 | 2629609 | 2448227 | 2446899 |         |
| 2857          | BURPS1655_D1133 |         |         |         |         |         |         |         |         |         |         |         |         |         |         |         |         | 2448717 | 2448457 |
| 2858 BPSS1961 | 2603569         | 2603745 | 2459681 | 2459505 | 1819566 | 1819742 | 1333151 | 1333327 | 2720320 | 2720496 | 2676682 | 2676858 | 2678932 | 2679108 | 2631616 | 2631792 | 2449010 | 2449186 |         |
| 2859 BPSS1962 | 2604830         | 2604051 | 2458420 | 2459199 | 1820827 | 1820048 | 1334412 | 1333633 | 2721581 | 2720802 | 2677943 | 2677164 | 2680193 | 2679414 | 2632877 | 2632098 | 2450259 | 2449480 |         |
| 2860 BPSS1963 | 2606118         | 2604847 | 2457132 | 2458403 | 1822115 | 1820844 | 1335700 | 1334429 | 2722869 | 2721598 | 2679231 | 2677960 | 2681481 | 2680210 | 2634165 | 2632894 | 2451547 | 2450276 |         |
| 2861 BPSS1964 | 2607877         | 2606681 | 2455508 | 2456242 | 1823856 | 1822660 | 1337441 | 1336245 | 2724593 | 2723520 | 2681047 | 2679806 | 2683222 | 2682026 | 2635912 | 2634716 | 2453318 | 2452068 |         |
| 2862 BPSS1965 | 2608650         | 2608009 | 2454735 | 2455376 | 1824629 | 1823988 | 1338214 | 1337573 | 2725366 | 2724725 | 2681820 | 2681179 | 2683995 | 2683354 | 2636685 | 2636044 | 2454091 | 2453450 |         |
| 2863 BPSS1966 | 2608924         | 2609826 | 2454461 | 2453559 | 1824903 | 1825805 | 1338488 | 1339390 | 2725640 | 2726548 | 2682103 | 2683005 | 2684269 | 2685171 | 2636959 | 2637861 | 2454365 | 2455267 |         |
| 2864 BPSS1967 | 2610693         | 2610043 | 2452692 | 2453342 | 1826672 | 1826022 | 1340257 | 1339607 | 2727415 | 2726765 | 2683872 | 2683222 | 2686038 | 2685388 | 2638728 | 2638078 | 2456134 | 2455484 |         |
| 2865 BPSS1968 | 2610796         | 2611701 | 2452589 | 2451684 | 1826775 | 1827680 | 1340360 | 1341265 | 2727518 | 2728423 | 2683975 | 2684880 | 2686141 | 2687046 | 2638831 | 2639736 | 2456237 | 2457142 |         |
| 2866 BPSS1969 | 2611701         | 2613296 | 2451684 | 2450089 | 1827680 | 1829275 | 1341265 | 1342860 | 2728423 | 2730018 | 2684880 | 2686475 | 2687046 | 2688641 | 2639736 | 2641331 | 2457142 | 2458737 |         |
| 2867 BPSS1970 | 2613296         | 2614276 | 2450089 | 2449109 | 1829275 | 1830255 | 1342860 | 1343840 | 2730018 | 2730998 | 2686475 | 2687455 | 2688641 | 2689621 | 2641331 | 2642311 | 2458737 | 2459717 |         |
| 2868 BPSS1971 | 2614941         | 2616524 | 2448444 | 2446861 | 1830929 | 1832512 | 1344514 | 1346097 | 2731689 | 2733272 | 2688118 | 2689701 | 2690304 | 2691887 | 2643002 | 2644585 | 2460382 | 2461965 |         |
| 2869 BPSS1972 | 2616687         | 2617133 | 2446698 | 2446252 | 1832675 | 1833121 | 1346260 | 1346706 | 2733435 | 2733881 | 2689864 | 2690310 | 2692050 | 2692496 | 2644748 | 2645194 | 2462128 | 2462574 |         |
| 2870 BPSS1973 | 2618072         | 2620003 | 2445313 | 2443382 | 1834060 | 1835991 | 1347645 | 1349576 | 2734821 | 2736752 | 2691249 | 2693180 | 2693435 | 2695111 | 2646125 | 2648056 | 2463506 | 2465437 |         |
| 2871 BPSS1974 | 2620970         | 2622664 | 2442415 | 2440721 | 1836795 | 1838408 | 1350380 | 1352140 | 2737563 | 2739368 | 2696171 | 2697931 | 2696171 | 2697931 | 2648954 | 2650681 | 2466290 | 2468077 |         |
| 2872 BPSS1975 | 2622758         | 2624038 | 2440627 | 2439347 | 1838650 | 1839930 | 1352234 | 1353514 | 2739462 | 2740742 | 2696058 | 2697338 | 2698025 | 2699305 | 2650775 | 2652055 | 2468172 | 2469452 |         |
| 2873          | BURPS1106B_2492 |         |         | 2441823 | 2442641 |         |         |         |         |         |         |         |         |         |         |         |         |         |         |
| 2874 BPSS1976 | 2624771         | 2626138 | 2438614 | 2437247 | 1840755 | 1842122 | 1354339 | 1355706 | 2741513 | 2742880 | 2698085 | 2699452 | 2700104 | 2701471 | 2652826 | 2654193 | 2470218 | 2471585 |         |
| 2875 BPSS1977 | 2626173         | 2627498 | 2437212 | 2435887 | 1842157 | 1843482 | 1355741 | 1357066 | 2742915 | 2744240 | 2699487 | 2700812 | 2701506 | 2702831 | 2654228 | 2655553 | 2471620 | 2472945 |         |
| 2876 BPSS1978 | 2627626         | 2629986 | 2435759 | 2433399 | 1843610 | 1845970 | 1357194 | 1359554 | 2744368 | 2746728 | 2700940 | 2703300 | 2702959 | 2705319 | 2655681 | 2658041 | 2473073 | 2475433 |         |
| 2877 BPSS1979 | 2630543         | 2631649 | 2432842 | 2431736 | 1846527 | 1847633 | 1360111 | 1361217 | 2747285 | 2748391 | 2703857 | 2704969 | 2705876 | 2706982 | 2658598 | 2659704 | 2475990 | 2477096 |         |
| 2878 BPSS1980 | 2631775         | 2632275 | 2431610 | 2431110 | 1847759 | 1848259 | 1361343 | 1361843 | 2748517 | 2749017 | 2705095 | 2705583 | 2707108 | 2707608 | 2659830 | 2660330 | 2477222 | 2477722 |         |
| 2879 BPSS1981 | 2632561         | 2632833 | 2430824 | 2430552 | 1848545 | 1848817 | 1362129 | 1362401 | 2749303 | 2749575 | 2705871 | 2706143 | 2707894 | 2708166 | 2660616 | 2660888 | 2478008 | 2478280 |         |
| 2880 BPSS1982 | 2632849         | 2634114 | 2430536 | 2429271 | 1848833 | 1850098 | 1362417 | 1363682 | 2749591 | 2750856 | 2706159 | 2707424 | 2708182 | 2709447 | 2660904 | 2662169 | 2478296 | 2479561 |         |
| 2881 BPSS1983 | 2634897         | 2635946 | 2428488 | 2427439 | 1850881 | 1851930 | 1364465 | 1365514 | 2751639 | 2752688 | 2708207 | 2709256 | 2710230 | 2711279 | 2662952 | 2664001 | 2480344 | 2481393 |         |
| 2882 BPSS1984 | 2636021         | 2638924 | 2427364 | 2424461 | 1852005 | 1854908 | 1365589 | 1368492 | 2752763 | 2755666 | 2709331 | 2712234 | 2711354 | 2714257 | 2664076 | 2666979 | 2481468 | 2484371 |         |

|               |                  |         |         |         |         |         |         |         |         |         |         |         |         |         |         |         |         |         |         |
|---------------|------------------|---------|---------|---------|---------|---------|---------|---------|---------|---------|---------|---------|---------|---------|---------|---------|---------|---------|---------|
| 2886 BPSS1988 |                  | 2642126 | 2643139 | 2421259 | 2420246 | 1858110 | 1859123 | 1371694 | 1372707 | 2758868 | 2759881 | 2715436 | 2716449 | 2717459 | 2718472 | 2670181 | 2671194 | 2487573 | 2488586 |
| 2887 BPSS1989 |                  | 2643165 | 2644316 | 2420220 | 2419069 | 1859149 | 1860300 | 1372733 | 1373884 | 2759907 | 2761058 | 2716475 | 2717626 | 2718498 | 2719649 | 2671220 | 2672371 | 2488612 | 2489763 |
| 2888 BPSS1990 |                  | 2645175 | 2644426 | 2418210 | 2418959 | 1861159 | 1860410 | 1374743 | 1373994 | 2761917 | 2761168 | 2718485 | 2717736 | 2720508 | 2719759 | 2673230 | 2672481 | 2490622 | 2489873 |
| 2889 BPSS1991 |                  | 2645446 | 2646117 | 2417939 | 2417268 | 1861430 | 1862101 | 1375014 | 1375685 | 2762188 | 2762859 | 2718756 | 2719427 | 2720779 | 2721450 | 2673501 | 2674172 | 2490893 | 2491564 |
| 2890 BPSS1992 |                  | 2648147 | 2646258 | 2415238 | 2417127 | 1864131 | 1862242 | 1377715 | 1375826 | 2764889 | 2763000 | 2721466 | 2719577 | 2723480 | 2721591 | 2676211 | 2674322 | 2493603 | 2491714 |
| 2891 BPSS1993 |                  | 2649991 | 2648492 | 2413394 | 2414893 | 1865933 | 1864434 | 1379517 | 1378018 | 2766733 | 2765234 | 2723310 | 2721811 | 2725324 | 2723825 | 2678055 | 2676556 | 2495447 | 2493948 |
| 2892 BPSS1994 |                  | 2651692 | 2652381 | 2411693 | 2411004 | 1867634 | 1868323 | 1381218 | 1381907 | 2768425 | 2769114 | 2725011 | 2725700 | 2727034 | 2727723 | 2679756 | 2680445 | 2497175 | 2497864 |
| 2893 BPSS1995 |                  | 2652381 | 2653832 | 2411004 | 2409553 | 1868323 | 1869774 | 1381907 | 1383358 | 2769114 | 2770565 | 2725700 | 2727151 | 2727723 | 2729174 | 2680445 | 2681896 | 2497864 | 2499315 |
| 2894 BPSS1996 |                  | 2653935 | 2654324 | 2409450 | 2409061 | 1869877 | 1870266 | 1383461 | 1383850 | 2770668 | 2771057 | 2727254 | 2727643 | 2729277 | 2729666 | 2681999 | 2682388 | 2499418 | 2499807 |
| 2895 BPSS1997 |                  | 2655289 | 2654483 | 2408096 | 2408902 | 1871231 | 1870425 | 1384815 | 1384009 | 2772022 | 2771216 | 2728608 | 2727802 | 2730631 | 2729825 | 2683353 | 2682547 | 2500772 | 2499966 |
| 2896 BPSS1998 |                  | 2658800 | 2655939 | 2404585 | 2407446 | 1874717 | 1871856 | 1388301 | 1385440 | 2775533 | 2772672 | 2732119 | 2729258 | 2734117 | 2731256 | 2686864 | 2684003 | 2504283 | 2501422 |
| 2897 BPSS1999 |                  | 2660041 | 2659208 | 2403344 | 2404177 | 1875958 | 1875125 | 1389542 | 1388709 | 2776774 | 2775941 | 2733360 | 2732527 | 2735364 | 2734531 | 2688105 | 2687272 | 2505524 | 2504691 |
| 2898 BPSS2000 |                  | 2660396 | 2660058 | 2402989 | 2403327 | 1876313 | 1875975 | 1389897 | 1389559 | 2777129 | 2776791 | 2733715 | 2733377 | 2735719 | 2735381 | 2688460 | 2688122 | 2505879 | 2505541 |
| 2899 BPSS2001 |                  | 2661605 | 2661360 | 2401780 | 2402025 | 1877522 | 1877277 | 1391106 | 1390861 | 2778338 | 2778093 | 2734924 | 2734679 | 2736928 | 2736683 | 2689669 | 2689424 | 2507088 | 2506843 |
| 2900 BPSS2002 |                  | 2662671 | 2661937 | 2400714 | 2401448 | 1878588 | 1877854 | 1392172 | 1391438 | 2779404 | 2778670 | 2735990 | 2735256 | 2737994 | 2737260 | 2690735 | 2690001 | 2508154 | 2507420 |
| 2901 BPSS2003 |                  | 2663139 | 2663624 | 2400246 | 2399761 | 1879056 | 1879541 | 1392640 | 1393125 | 2779872 | 2780357 | 2736458 | 2736943 | 2738462 | 2738947 | 2691203 | 2691688 | 2508622 | 2509107 |
| 2902 BPSS2004 |                  | 2664274 | 2664002 | 2399111 | 2399383 | 1880191 | 1879919 | 1393775 | 1393503 | 2781007 | 2780735 | 2737593 | 2737396 | 2739597 | 2739325 | 2692338 | 2692066 | 2509756 | 2509499 |
| 2903 BPSS2005 |                  | 2664590 | 2664282 | 2398795 | 2399103 | 1880507 | 1880199 | 1394091 | 1393783 | 2781323 | 2781015 | 2737897 | 2737601 | 2739913 | 2739605 | 2692654 | 2692346 | 2510072 | 2509764 |
| 2904          | BURPS1106B_2438  |         |         | 2393442 | 2392330 |         |         |         |         |         |         |         |         |         |         |         |         |         |         |
| 2905          | BURPS1106B_2439  |         |         | 2395167 | 2393467 |         |         |         |         |         |         |         |         |         |         |         |         |         |         |
| 2906          | BURPS1106B_2440  |         |         | 2396252 | 2395218 |         |         |         |         |         |         |         |         |         |         |         |         |         |         |
| 2907          | BURPS1106B_2441  |         |         | 2397919 | 2396303 |         |         |         |         |         |         |         |         |         |         |         |         |         |         |
| 2908          | BURPS1106B_2443  |         |         | 2398733 | 2398539 |         |         |         |         |         |         |         |         |         |         |         |         |         |         |
| 2909          | BURPS1655_D1063  |         |         |         |         |         |         |         |         |         |         |         |         |         |         |         |         | 2515425 | 2516537 |
| 2910          | BURPS1655_D1064  |         |         |         |         |         |         |         |         |         |         |         |         |         |         |         |         | 2513700 | 2515400 |
| 2911          | BURPS1655_D1065  |         |         |         |         |         |         |         |         |         |         |         |         |         |         |         |         | 2512576 | 2513649 |
| 2912          | BURPS1655_D1066  |         |         |         |         |         |         |         |         |         |         |         |         |         |         |         |         | 2510948 | 2512564 |
| 2913          | BURPS1710A_A2015 |         |         |         |         | 1880569 | 1880763 |         |         |         |         |         |         |         |         |         |         |         |         |
| 2914          | BURPS1710A_A2017 |         |         |         |         | 1881383 | 1882999 |         |         |         |         |         |         |         |         |         |         |         |         |
| 2915          | BURPS1710A_A2018 |         |         |         |         | 1883050 | 1884084 |         |         |         |         |         |         |         |         |         |         |         |         |
| 2916          | BURPS1710A_A2019 |         |         |         |         | 1884135 | 1885835 |         |         |         |         |         |         |         |         |         |         |         |         |
| 2917          | BURPS1710A_A2020 |         |         |         |         | 1885860 | 1886972 |         |         |         |         |         |         |         |         |         |         |         |         |
| 2918          | BURPS1710b_A1115 |         |         |         |         |         |         | 1394967 | 1396583 |         |         |         |         |         |         |         |         |         |         |
| 2919          | BURPS1710b_A1116 |         |         |         |         |         |         | 1396595 | 1397668 |         |         |         |         |         |         |         |         |         |         |
| 2920          | BURPS1710b_A1117 |         |         |         |         |         |         | 1397719 | 1399419 |         |         |         |         |         |         |         |         |         |         |
| 2921          | BURPS1710b_A1118 |         |         |         |         |         |         | 1399516 | 1400556 |         |         |         |         |         |         |         |         |         |         |
| 2922          | BURPS406E_D0263  |         |         |         |         |         |         |         |         | 2786676 | 2787788 |         |         |         |         |         |         |         |         |
| 2923          | BURPS406E_D0264  |         |         |         |         |         |         |         |         | 2784951 | 2786651 |         |         |         |         |         |         |         |         |
| 2924          | BURPS406E_D0265  |         |         |         |         |         |         |         |         | 2783827 | 2784900 |         |         |         |         |         |         |         |         |
| 2925          | BURPS406E_D0266  |         |         |         |         |         |         |         |         | 2782199 | 2783815 |         |         |         |         |         |         |         |         |
| 2926          | BURPSS13_X0871   |         |         |         |         |         |         |         |         |         |         |         |         |         |         | 2693530 | 2695146 |         |         |
| 2927          | BURPSS13_X0872   |         |         |         |         |         |         |         |         |         |         |         |         |         |         | 2695158 | 2696231 |         |         |
| 2928          | BURPSS13_X0873   |         |         |         |         |         |         |         |         |         |         |         |         |         |         | 2696282 | 2697982 |         |         |
| 2929          | BURPSS13_X0874   |         |         |         |         |         |         |         |         |         |         |         |         |         |         | 2698007 | 2699119 |         |         |
| 2930 BPSS2006 |                  | 2671297 | 2671160 | 2392088 | 2392225 | 1887214 | 1887077 | 1400798 | 1400661 | 2788030 | 2787893 | 2744603 | 2744466 | 2740113 | 2739976 | 2699361 | 2699224 | 2516779 | 2516642 |
| 2931 BPSS2007 |                  | 2672475 | 2671312 | 2390910 | 2392073 | 1888392 | 1887229 | 1401976 | 1400813 | 2789208 | 2788045 | 2745781 | 2744618 | 2741291 | 2740128 | 2700539 | 2699376 | 2517951 | 2516794 |
| 2932 BPSS2008 |                  | 2672846 | 2673463 | 2390539 | 2389922 | 1888763 | 1889380 | 1402347 | 1402964 | 2789579 | 2790196 | 2746146 | 2746769 | 2741656 | 2742229 | 2700910 | 2701527 | 2518322 | 2518939 |
| 2933 BPSS2009 |                  | 2675511 | 2673691 | 2387874 | 2389694 | 1891422 | 1889608 | 1405006 | 1403192 | 2792238 | 2790424 | 2748805 | 2746991 | 2744321 | 2742507 | 2703575 | 2701755 | 2520981 | 2519167 |
| 2934 BPSS2010 |                  | 2676637 | 2675543 | 2386748 | 2387842 | 1892550 | 1891432 | 1406134 | 1405016 | 2793366 | 2792248 | 2749933 | 2748815 | 2745449 | 2744331 | 2704703 | 2703585 | 2522109 | 2520991 |
| 2935 BPSS2011 |                  | 2678842 | 2676731 | 2384543 | 2386654 | 1894763 | 1892646 | 1408347 | 1406230 | 2795573 | 2793462 | 2752129 | 2750027 | 2747656 | 2745545 | 2706910 | 2704799 | 2524316 | 2522205 |
| 2936 BPSS2012 |                  | 2679987 | 2679175 | 2383398 | 2384210 | 1895908 | 1895096 | 1409492 | 1408680 | 2796718 | 2795906 | 2753274 | 2752462 | 2748801 | 2747989 | 2708055 | 2707243 | 2525461 | 2524649 |
| 2937 BPSS2013 |                  | 2680983 | 2680003 | 2382402 | 2383382 | 1896937 | 1895924 | 1410521 | 1409508 | 2797759 | 2796734 | 2754351 | 2753290 | 2749815 | 2748817 | 2709066 | 2708071 | 2526493 | 2525477 |
| 2938 BPSS2014 |                  | 2682313 | 2681339 | 2381072 | 2382046 | 1898168 | 1897194 | 1411752 | 1410778 | 2798990 | 2798016 | 2755582 | 2754608 | 2751046 | 2750072 | 2710423 | 2709449 | 2527724 | 2526750 |
| 2939 BPSS2015 |                  | 2683708 | 2682335 | 2379677 | 2381050 | 1899563 | 1898190 | 1413147 | 1411774 | 2800385 | 2799012 | 2756977 | 2755604 | 2752441 | 2751068 | 2711815 | 2710445 | 2529119 | 2527746 |
| 2940 BPSS2016 |                  | 2685159 | 2686370 | 2378226 | 2377015 | 1901005 | 1902216 | 1414589 | 1415800 | 2801839 | 2803050 | 2758381 | 2759592 | 2753883 | 2755094 | 2713263 | 2714474 | 2530561 | 2531772 |
| 2941          | BURPS1710A_A2039 |         |         |         |         | 1903051 | 1902812 |         |         |         |         |         |         |         |         |         |         |         |         |
| 2942 BPSS2017 |                  | 2688521 | 2687646 | 2374864 | 2375739 | 1904366 | 1903491 | 1417950 | 1417075 | 2805211 | 2804336 | 2761746 | 2760871 | 2757251 | 2756376 | 2716623 | 2715748 | 2533963 | 2533088 |
| 2943 BPSS2018 |                  | 2688657 | 2689412 | 2374728 | 2373973 | 1904502 | 1905257 | 1418086 | 1418841 | 2805347 | 2806102 | 2761882 | 2762637 | 2757387 | 2758142 | 2716759 | 2717514 | 2534099 | 2534854 |

|               |                 |                  |                   |         |         |         |         |         |         |         |         |         |         |         |         |         |         |         |         |         |
|---------------|-----------------|------------------|-------------------|---------|---------|---------|---------|---------|---------|---------|---------|---------|---------|---------|---------|---------|---------|---------|---------|---------|
| 2944 BPSS2019 | BURPS1655_D1033 | 2689559          | 2689888           | 2373826 | 2373497 | 1905404 | 1905733 | 1418988 | 1419317 | 2806249 | 2806560 | 2762784 | 2763113 | 2758289 | 2758618 | 2717661 | 2717990 | 2535001 | 2535321 |         |
| 2945 BPSS2020 |                 | 2690129          | 2690554           | 2373256 | 2372831 | 1905974 | 1906399 | 1419558 | 1419983 | 2806801 | 2807226 | 2763342 | 2763767 | 2758859 | 2759284 | 2718231 | 2718656 | 2535559 | 2535984 |         |
| 2946 BPSS2021 |                 | 2692258          | 2690780           | 2371127 | 2372605 | 1908103 | 1906625 | 1421687 | 1420209 | 2808942 | 2807464 | 2765471 | 2763993 | 2760988 | 2759510 | 2720372 | 2718894 | 2537700 | 2536222 |         |
| 2947 BPSS2022 |                 | 2692428          | 2693300           | 2370957 | 2370085 | 1908273 | 1909145 | 1421857 | 1422729 | 2809112 | 2809984 | 2765641 | 2766513 | 2761158 | 2762030 | 2720542 | 2721414 | 2537870 | 2538742 |         |
| 2948 BPSS2023 |                 | 2693667          | 2693927           | 2369718 | 2369458 | 1909512 | 1909772 | 1423096 | 1423356 | 2810365 | 2810625 | 2766867 | 2767127 | 2762396 | 2762656 | 2721795 | 2722055 | 2539109 | 2539369 |         |
| 2949 BPSS2024 |                 | 2695150          | 2693945           | 2368235 | 2369440 | 1910995 | 1909790 | 1424579 | 1423374 | 2811848 | 2810643 | 2768350 | 2767145 | 2763879 | 2762674 | 2723278 | 2722073 | 2540592 | 2539387 |         |
| 2950          |                 |                  |                   |         |         |         |         |         |         |         |         |         |         |         |         |         |         | 2540896 | 2541054 |         |
| 2951 BPSS2025 |                 | 2697127          | 2695607           | 2366258 | 2367778 | 1913051 | 1911531 | 1426635 | 1425115 | 2813872 | 2812352 | 2770378 | 2768858 | 2765895 | 2764375 | 2725263 | 2723743 | 2542601 | 2541081 |         |
| 2952 BPSS2026 |                 | 2699016          | 2697406           | 2364369 | 2365979 | 1914940 | 1913330 | 1428524 | 1426914 | 2815761 | 2814151 | 2772267 | 2770657 | 2767784 | 2766174 | 2727152 | 2725542 | 2544490 | 2542880 |         |
| 2953 BPSS2027 |                 | 2699984          | 2699613           | 2363401 | 2363772 | 1915928 | 1915557 | 1429512 | 1429141 | 2816744 | 2816373 | 2773265 | 2772894 | 2768772 | 2768401 | 2728120 | 2727749 | 2545458 | 2545087 |         |
| 2954 BPSS2028 | BURPS1106B_2404 | 2700835          | 2700206           | 2362550 | 2363179 | 1916779 | 1916150 | 1430363 | 1429734 | 2817595 | 2816966 | 2774116 | 2773490 | 2769623 | 2768994 | 2728971 | 2728342 | 2546309 | 2545680 |         |
| 2955 BPSS2029 |                 | 2703602          | 2702433           | 2359783 | 2360952 | 1918189 | 1917020 | 1431773 | 1430604 | 2819005 | 2817836 | 2775526 | 2774357 | 2771033 | 2769864 | 2730381 | 2729212 | 2547719 | 2546550 |         |
| 2956          |                 |                  |                   | 2362219 | 2361116 |         |         |         |         |         |         |         |         |         |         |         |         |         |         |         |
| 2957 BPSS2030 |                 | 2703919          | 2704788           | 2359466 | 2358597 | 1918504 | 1919373 | 1432088 | 1432957 | 2819320 | 2820189 | 2775840 | 2776712 | 2771348 | 2772217 | 2730693 | 2731565 | 2548033 | 2548905 |         |
| 2958 BPSS2031 |                 | 2704793          | 2706406           | 2358592 | 2356979 | 1919378 | 1920991 | 1432962 | 1434575 | 2820194 | 2821807 | 2776717 | 2778330 | 2772222 | 2773835 | 2731570 | 2733183 | 2548910 | 2550523 |         |
| 2959 BPSS2032 |                 | 2706422          | 2707570           | 2356963 | 2355815 | 1921007 | 1922155 | 1434591 | 1435739 | 2821823 | 2822971 | 2778346 | 2779494 | 2773851 | 2774999 | 2733199 | 2734347 | 2550539 | 2551687 |         |
| 2960 BPSS2033 |                 | 2707580          | 2708419           | 2355805 | 2354966 | 1922165 | 1923004 | 1435749 | 1436588 | 2822981 | 2823820 | 2779504 | 2780343 | 2775376 | 2775849 | 2734357 | 2735196 | 2551697 | 2552536 |         |
| 2961 BPSS2034 |                 | 2708419          | 2710422           | 2354966 | 2352963 | 1923004 | 1925013 | 1436588 | 1438597 | 2823820 | 2825829 | 2780343 | 2782352 | 2775849 | 2777858 | 2735196 | 2737205 | 2552536 | 2554545 |         |
| 2962 BPSS2035 |                 | 2710460          | 2711341           | 2352925 | 2352044 | 1925051 | 1925932 | 1438635 | 1439516 | 2825867 | 2826748 | 2782390 | 2783271 | 2777896 | 2778777 | 2737243 | 2738124 | 2554584 | 2555465 |         |
| 2963 BPSS2036 |                 | 2711707          | 2713365           | 2351678 | 2350020 | 1926298 | 1927956 | 1439882 | 1441540 | 2827114 | 2828772 | 2783637 | 2785295 | 2779143 | 2780801 | 2738490 | 2740148 | 2555831 | 2557489 |         |
| 2964          | BURPS1655_D1018 |                  |                   |         |         |         |         |         |         |         |         |         |         |         |         |         |         | 2557471 | 2558283 |         |
| 2965 BPSS2037 |                 | 2714472          | 2715380           | 2348913 | 2348005 | 1929063 | 1929971 | 1442647 | 1443555 | 2829878 | 2830786 | 2786401 | 2787309 | 2781907 | 2782815 | 2741255 | 2742163 | 2558594 | 2559502 |         |
| 2966 BPSS2038 |                 | 2715409          | 2715690           | 2347976 | 2347695 | 1930000 | 1930281 | 1443584 | 1443865 | 2830815 | 2831096 | 2787338 | 2787619 | 2782844 | 2783125 | 2742192 | 2742473 | 2559531 | 2559812 |         |
| 2967 BPSS2039 |                 | 2715706          | 2716638           | 2347679 | 2346747 | 1930297 | 1931229 | 1443881 | 1444813 | 2831112 | 2832044 | 2787635 | 2788567 | 2783141 | 2784073 | 2742489 | 2743421 | 2559828 | 2560760 |         |
| 2968 BPSS2040 |                 | 2716638          | 2717675           | 2346747 | 2345710 | 1931229 | 1932266 | 1444813 | 1445850 | 2832044 | 2833081 | 2788567 | 2789604 | 2784073 | 2785110 | 2743421 | 2744458 | 2560760 | 2561794 |         |
| 2969 BPSS2041 |                 | 2717719          | 2718741           | 2345666 | 2344644 | 1932310 | 1933332 | 1445894 | 1446916 | 2833125 | 2834147 | 2789648 | 2790670 | 2785154 | 2786176 | 2744502 | 2745524 | 2561841 | 2562863 |         |
| 2970 BPSS2042 |                 | 2718741          | 2720591           | 2344644 | 2342794 | 1933332 | 1935182 | 1446916 | 1448766 | 2834147 | 2835997 | 2790670 | 2792520 | 2786176 | 2788026 | 2745524 | 2747374 | 2562863 | 2564713 |         |
| 2971 BPSS2043 |                 | 2720608          | 2721024           | 2342777 | 2342361 | 1935199 | 1935615 | 1448783 | 1449199 | 2836014 | 2836430 | 2792537 | 2792953 | 2788043 | 2788459 | 2747391 | 2747807 | 2564730 | 2565146 |         |
| 2972 BPSS2044 |                 | 2721196          | 2722002           | 2342189 | 2341383 | 1935787 | 1936593 | 1449371 | 1450177 | 2836602 | 2837408 | 2793125 | 2793931 | 2788631 | 2789437 | 2747979 | 2748785 | 2565318 | 2566124 |         |
| 2973 BPSS2045 |                 | 2722475          | 2723068           | 2340910 | 2340317 | 1937066 | 1937659 | 1450650 | 1451243 |         |         | 2794403 | 2794996 | 2789910 | 2790503 | 2749258 | 2749851 | 2566598 | 2567191 |         |
| 2974          | BURPS1655_D1007 |                  |                   |         |         |         |         |         |         |         |         |         |         |         |         |         |         | 2567402 | 2568067 |         |
| 2975 BPSS2046 |                 | 2723308          | 2724033           | 2340077 | 2339352 | 1937899 | 1938624 | 1451483 | 1452208 | 2837835 | 2838560 | 1647435 | 1648160 | 2790743 | 2791468 | 2750091 | 2750816 | 2571181 | 2570456 |         |
| 2976 BPSS2047 |                 |                  |                   |         |         |         |         |         |         | 2840856 | 2839426 | 1649346 | 1650776 |         |         |         |         |         |         |         |
| 2977 BPSS2048 |                 |                  |                   |         |         |         |         |         |         | 2839400 | 2838747 | 1650802 | 1651455 |         |         |         |         | 2569616 | 2570269 |         |
| 2978          |                 |                  |                   |         |         |         |         |         |         |         |         | 1651544 | 1652983 |         |         |         |         |         |         |         |
| 2979          |                 | BURPS668_A1700   |                   |         |         |         |         |         |         |         |         | 1653717 | 1653869 |         |         |         |         |         |         |         |
| 2980          |                 | BURPS668_A1702   |                   |         |         |         |         |         |         |         |         | 1653839 | 1654795 |         |         |         |         |         |         |         |
| 2981 BPSS2049 |                 |                  | 2723308           | 2724033 | 2340077 | 2339352 | 1937899 | 1938624 | 1451483 | 1452208 | 2841804 | 2841079 | 1655622 | 1654897 | 2790743 | 2791468 | 2750091 | 2750816 | 2571181 | 2570456 |
| 2982          |                 | BURPS1710A_A2084 |                   |         |         | 1939271 | 1938831 |         |         |         |         |         |         |         |         |         |         |         |         |         |
| 2983          |                 | Bp_chr2_13_IS40  | 2725193           | 2726428 | 2336957 | 2338192 | 1939784 | 1941019 | 1453368 | 1454603 |         |         |         | 2792628 | 2793863 | 2751976 | 2753211 |         |         |         |
| 2984          | BURPS1106B_2379 |                  |                   | 2338705 | 2339145 |         |         |         |         |         |         |         |         |         |         |         |         |         |         |         |
| 2985 BPSS2050 |                 |                  |                   |         |         |         |         |         |         |         |         |         |         |         |         |         |         | 2571394 | 2571224 |         |
| 2986 BPSS2051 |                 |                  | 2726984           | 2726430 | 2336401 | 2336955 | 1941575 | 1941024 | 1455159 | 1454608 |         |         |         | 2794419 | 2793868 | 2753767 | 2753213 | 2572952 | 2571816 |         |
| 2987 BPSS2052 |                 |                  | 2728711           | 2726987 | 2334674 | 2336398 | 1943302 | 1941578 | 1456886 | 1455162 | 2843957 | 2842233 |         | 2796146 | 2794422 | 2755494 | 2753770 | 2574679 | 2572955 |         |
| 2988          |                 | BURPS1106B_2373  |                   | 2334817 | 2334668 |         |         |         |         |         |         |         |         |         |         |         |         |         |         |         |
| 2989          |                 | BURPS406E_D0204  |                   |         |         |         |         |         |         |         |         | 2844182 | 2844379 |         |         |         |         |         |         |         |
| 2990 BPSS2053 |                 |                  | 2738612           | 2729382 | 2324773 | 2334003 | 1953203 | 1943973 | 1466787 | 1457557 | 2853978 | 2844928 |         | 2806047 | 2796817 | 2765395 | 2756165 | 2584580 | 2575350 |         |
| 2991          |                 | BURPS1655_D0995  |                   |         |         |         |         |         |         |         |         |         |         |         |         |         |         | 2590419 | 2585824 |         |
| 2992          |                 | BURPS1655_D0996  |                   |         |         |         |         |         |         |         |         |         |         |         |         |         |         | 2585732 | 2585550 |         |
| 2993 BPSS2054 |                 |                  | 2744448           | 2739820 | 2318937 | 2323565 | 1959039 | 1954411 | 1472623 | 1467995 | 2859814 | 2855186 |         | 2811883 | 2807255 | 2771231 | 2766603 |         |         |         |
| 2994 BPSS2055 | BURPS1655_D0990 |                  | 2745730           | 2744468 | 2317655 | 2318917 | 1960321 | 1959059 | 1473905 | 1472643 | 2861096 | 2859834 |         | 2813165 | 2811903 | 2772513 | 2771251 | 2591674 | 2590412 |         |
| 2995 BPSS2056 |                 |                  | 2747950           | 2745749 | 2315435 | 2317636 | 1962541 | 1960340 | 1476125 | 1473924 | 2863314 | 2861944 |         | 2815385 | 2813184 | 2774733 | 2772532 | 2593894 | 2591693 |         |
| 2996          |                 | BURPS1655_D0990  |                   |         |         |         |         |         |         |         |         |         |         |         |         |         |         | 2596358 | 2595351 |         |
| 2997          |                 | BURPS406E_D0196  |                   |         |         |         |         |         |         |         |         | 2865667 | 2864771 |         |         |         |         |         |         |         |
| 2998          |                 | BPSS2057         | Bp_chr2_14_ISBma1 |         |         |         |         |         |         |         |         | 2866427 | 2867102 |         |         |         |         | 2596662 | 2597337 |         |
| 2999          |                 | BURPS1655_D0988  |                   |         |         |         |         |         |         |         |         |         |         |         |         |         |         | 2597977 | 2598546 |         |
| 3000          |                 | BURPS1655_D0989  |                   |         |         |         |         |         |         |         |         |         |         |         |         |         |         | 2597354 | 2597821 |         |
| 3001          |                 | BURPS406E_D0195  |                   |         |         |         |         |         |         |         |         | 2867119 | 2867586 |         |         |         |         |         |         |         |

[illegible]

|                |                  |         |         |         |         |         |         |         |         |         |         |         |         |         |         |         |         |         |         |
|----------------|------------------|---------|---------|---------|---------|---------|---------|---------|---------|---------|---------|---------|---------|---------|---------|---------|---------|---------|---------|
| 3060 BPSS2104  |                  | 2788265 | 2784639 | 2275120 | 2278746 | 2002879 | 1999253 | 1516463 | 1512837 | 2910570 | 2906944 | 2822606 | 2818980 | 2856917 | 2853291 | 2814970 | 2811344 | 2670278 | 2666652 |
| 3061 BPSS2105  |                  | 2789584 | 2788271 | 2273801 | 2275114 | 2004198 | 2002885 | 1517782 | 1516469 | 2911889 | 2910576 | 2823925 | 2822612 | 2858236 | 2856923 | 2816289 | 2814976 | 2671597 | 2670284 |
| 3062 BPSS2106  |                  | 2790988 | 2789603 | 2272397 | 2273782 | 2005602 | 2004217 | 1519186 | 1517801 | 2913293 | 2911908 | 2825329 | 2823944 | 2859640 | 2858255 | 2817693 | 2816308 | 2673001 | 2671616 |
| 3063 BPSS2107  |                  | 2791518 | 2791003 | 2271867 | 2272382 | 2006132 | 2005617 | 1519716 | 1519201 | 2913823 | 2913308 | 2825859 | 2825344 | 2860170 | 2859655 | 2818223 | 2817708 | 2673531 | 2673016 |
| 3064 BPSS2108  |                  | 2792209 | 2792556 | 2271176 | 2270829 | 2006823 | 2007170 | 1520407 | 1520754 | 2914514 | 2914861 | 2826550 | 2826897 | 2860861 | 2861208 | 2818914 | 2819261 | 2674222 | 2674569 |
| 3065 BPSS2109  |                  | 2792614 | 2794047 | 2270771 | 2269338 | 2007228 | 2008661 | 1520812 | 1522245 | 2914919 | 2916352 | 2826955 | 2828385 | 2861266 | 2862699 | 2819319 | 2820752 | 2674627 | 2676060 |
| 3066 BPSS2110  |                  | 2795998 | 2794097 | 2267387 | 2269288 | 2010611 | 2008710 | 1524195 | 1522294 | 2918296 | 2916401 | 2830329 | 2828434 | 2864649 | 2862748 | 2822709 | 2828082 | 2678004 | 2676109 |
| 3067 BPSS2111  |                  | 2796429 | 2797709 | 2266956 | 2265676 | 2011038 | 2012321 | 1524622 | 1525905 | 2918726 | 2920003 | 2830758 | 2832038 | 2865076 | 2866359 | 2823140 | 2824420 | 2678432 | 2679715 |
| 3068 BPSS2112  |                  | 2798022 | 2798336 | 2265363 | 2265049 | 2012646 | 2012948 | 1526230 | 1526532 | 2920318 | 2920632 | 2832353 | 2832667 | 2866684 | 2866986 | 2824733 | 2825047 | 2680028 | 2680342 |
| 3069 BPSS2113  |                  | 2798388 | 2798561 | 2264997 | 2264824 | 2013000 | 2013173 | 1526584 | 1526757 | 2920684 | 2920857 | 2832837 | 2832899 | 2867038 | 2867211 | 2825099 | 2825272 | 2680394 | 2680567 |
| 3070 BPSS2114  |                  | 2799770 | 2799069 | 2263616 | 2264317 | 2014372 | 2013671 | 1527996 | 1527295 | 2922046 | 2921345 | 2834128 | 2833427 | 2868400 | 2867699 | 2826411 | 2825710 | 2681706 | 2681005 |
| 3071 BPSS2115  |                  | 2799937 | 2800863 | 2263449 | 2262523 | 2014539 | 2015465 | 1528163 | 1529089 | 2922213 | 2923139 | 2834295 | 2835221 | 2868567 | 2869121 | 2826578 | 2827504 | 2681872 | 2682798 |
| 3072 BPSS2116  |                  | 2802359 | 2801025 | 2261027 | 2262361 | 2016959 | 2015625 | 1530583 | 1529249 | 2924669 | 2923335 | 2836788 | 2835454 | 2870988 | 2869654 | 2828988 | 2827654 | 2684377 | 2683043 |
| 3073 BPSS2117  |                  | 2802456 | 2803394 | 2260930 | 2259992 | 2017056 | 2017994 | 1530680 | 1531618 | 2924766 | 2925704 | 2836885 | 2837823 | 2871085 | 2872023 | 2829085 | 2830023 | 2684474 | 2685412 |
| 3074 BPSS2118  |                  | 2805098 | 2804409 | 2258288 | 2258977 | 2019685 | 2018996 | 1533309 | 1532620 | 2927408 | 2926719 |         |         | 2873714 | 2873025 | 2831727 | 2831038 | 2687103 | 2686414 |
| 3075 BPSS2119  |                  | 2805153 | 2805890 | 2258233 | 2257496 | 2019740 | 2020477 | 1533364 | 1534101 | 2927463 | 2928200 |         |         | 2873769 | 2874506 | 2831782 | 2832519 | 2687158 | 2687895 |
| 3076 BPSS2120  |                  | 2805898 | 2807136 | 2257488 | 2256250 | 2020485 | 2021723 | 1534109 | 1535347 | 2928208 | 2929446 |         |         | 2874514 | 2875752 | 2832527 | 2833765 | 2687903 | 2689141 |
| 3077 BPSS2121  |                  | 2807186 | 2808304 | 2256200 | 2255082 | 2021773 | 2022891 | 1535397 | 1536515 | 2929496 | 2930614 |         |         | 2875802 | 2876920 | 2833815 | 2834933 | 2689191 | 2690309 |
| 3078 BPSS2122  |                  | 2809196 | 2808888 | 2254190 | 2254498 | 2023782 | 2023387 | 1537406 | 1537011 | 2931506 | 2931300 | 2840714 | 2840619 | 2877811 | 2877416 | 2835824 | 2835618 | 2691199 | 2690804 |
| 3079 BPSS2123  |                  | 2809719 | 2810999 | 2253667 | 2252387 | 2024286 | 2025566 | 1537910 | 1539190 | 2932010 | 2933290 | 2841218 | 2842498 | 2878315 | 2879595 | 2836328 | 2837608 | 2691703 | 2692983 |
| 3080           | BURPS1655_D0657  |         |         |         |         | 2025932 | 2025723 |         |         |         |         |         |         |         |         |         |         | 2693358 | 2693098 |
| 3081           | BURPS1710A_A2157 |         |         |         |         |         |         |         |         |         |         |         |         |         |         |         |         |         |         |
| 3082           | BURPS406E_D0135  |         |         |         |         |         |         |         |         | 2933290 | 2933940 |         |         |         |         |         |         |         |         |
| 3083 BPSS2124  |                  | 2811630 | 2812550 | 2251740 | 2250820 | 2026226 | 2027146 | 1539850 | 1540770 | 2933950 | 2934870 | 2843167 | 2844087 | 2880179 | 2881099 | 2838223 | 2839143 | 2693632 | 2694552 |
| 3084           | BURPS1106B_2307  |         |         | 2252018 | 2252251 |         |         |         |         |         |         |         |         |         |         |         |         |         |         |
| 3085 BPSS2125  |                  | 2812618 | 2813757 | 2250752 | 2249613 | 2027214 | 2028353 | 1540838 | 1541977 | 2934938 | 2936077 | 2844155 | 2845294 | 2881167 | 2882306 | 2839211 | 2840350 | 2694620 | 2695759 |
| 3086 BPSS2126  |                  | 2814792 | 2813947 | 2248578 | 2249423 | 2029381 | 2028536 | 1543005 | 1542160 | 2937105 | 2936260 | 2846322 | 2845477 | 2883334 | 2882489 | 2841385 | 2840540 | 2696794 | 2695949 |
| 3087 BPSS2127  |                  | 2815303 | 2816124 | 2248067 | 2247246 | 2029892 | 2030713 | 1543516 | 1544337 | 2937599 | 2938420 | 2846861 | 2847682 | 2883845 | 2884666 | 2841896 | 2842717 | 2697305 | 2698126 |
| 3088 BPSS2128  |                  | 2816427 | 2817827 | 2246905 | 2245505 | 2031135 | 2032535 | 1544646 | 1546046 | 2938729 | 2940129 | 2847985 | 2849385 | 2884975 | 2886375 | 2843026 | 2844426 | 2698429 | 2699829 |
| 3089 BPSS2129  |                  | 2818016 | 2818564 | 2245316 | 2244768 | 2032724 | 2033272 | 1546235 | 1546783 | 2940318 | 2940863 | 2849574 | 2850122 | 2886564 | 2887112 | 2844615 | 2845160 | 2700018 | 2700566 |
| 3090 BPSS2130  |                  | 2821497 | 2819089 | 2241834 | 2243699 | 2036212 | 2033804 | 1549723 | 1547315 | 2943799 | 2941391 | 2853055 | 2850647 | 2890052 | 2887644 | 2848110 | 2845702 | 2703534 | 2701126 |
| 3091 BPSS2131  |                  | 2823281 | 2822994 | 2240050 | 2240337 |         |         | 1551507 | 1551220 |         |         | 2854839 | 2854552 | 2891883 | 2891596 | 2849673 | 2849455 |         |         |
| 3092 BPSS2131a |                  | 2824296 | 2823742 | 2239035 | 2239589 | 2038676 | 2038122 | 1552522 | 1551968 | 2946002 | 2945451 | 2855854 | 2855300 | 2892898 | 2892344 | 2850694 | 2850134 | 2705531 | 2704980 |
| 3093 BPSS2132  |                  | 2826120 | 2824603 | 2237212 | 2238297 | 2040500 | 2038983 | 1554346 | 1552829 | 2947895 | 2946378 | 2857678 | 2856179 | 2894722 | 2893205 | 2852512 | 2850995 | 2707421 | 2705904 |
| 3094 BPSS2133  |                  | 2826464 | 2827825 | 2236868 | 2235507 | 2040843 | 2042204 | 1554689 | 1556050 | 2948239 | 2949600 | 2858023 | 2859384 | 2895065 | 2896426 | 2852856 | 2854217 | 2707766 | 2709127 |
| 3095 BPSS2134  |                  | 2828186 | 2828428 | 2235146 | 2234904 | 2042565 | 2042807 | 1556411 | 1556653 | 2949961 | 2950203 | 2859745 | 2859987 | 2896759 | 2897001 | 2854673 | 2854915 | 2709488 | 2709730 |
| 3096 BPSS2135  |                  | 2828586 | 2829575 | 2234746 | 2233757 | 2042965 | 2043954 | 1556811 | 1557800 | 2950361 | 2951350 | 2860145 | 2861134 | 2897159 | 2898148 | 2855073 | 2856062 | 2709888 | 2710877 |
| 3097 BPSS2136  |                  | 2831352 | 2829913 | 2231980 | 2233419 | 2045731 | 2044292 | 1559577 | 1558138 | 2953127 | 2951688 | 2862911 | 2861472 | 2899925 | 2898486 | 2857850 | 2856411 | 2712654 | 2711215 |
| 3098 BPSS2137  |                  | 2832661 | 2831531 | 2230671 | 2231801 | 2047040 | 2045910 | 1560886 | 1559756 | 2954436 | 2953306 | 2864220 | 2863090 | 2901234 | 2900104 | 2859159 | 2858029 | 2713963 | 2712833 |
| 3099 BPSS2138  |                  | 2833647 | 2832661 | 2229685 | 2230671 | 2048026 | 2047040 | 1561872 | 1560886 | 2955422 | 2954436 | 2865206 | 2864220 | 2902220 | 2901234 | 2860145 | 2859159 | 2714949 | 2713963 |
| 3100 BPSS2139  |                  | 2834551 | 2833652 | 2228781 | 2229680 | 2048930 | 2048031 | 1562776 | 1561877 | 2956326 | 2955427 | 2866110 | 2865211 | 2903124 | 2902225 | 2861049 | 2860150 | 2715853 | 2714954 |
| 3101 BPSS2140  |                  | 2835501 | 2834566 | 2227831 | 2228766 | 2049880 | 2048945 | 1563726 | 1562791 | 2957276 | 2956341 | 2867060 | 2866125 | 2904074 | 2903139 | 2861999 | 2861064 | 2716803 | 2715868 |
| 3102 BPSS2141  |                  | 2837183 | 2835522 | 2226149 | 2227810 | 2051562 | 2049901 | 1565408 | 1563747 | 2958958 | 2957297 | 2868742 | 2867081 | 2905756 | 2904095 | 2863681 | 2862020 | 2718485 | 2716824 |
| 3103 BPSS2142  |                  | 2837900 | 2837322 | 2225432 | 2226010 | 2052279 | 2051701 | 1566125 | 1565547 | 2959675 | 2959097 | 2869459 | 2868881 | 2906473 | 2905895 | 2864398 | 2863820 | 2719202 | 2718624 |
| 3104 BPSS2143  |                  | 2838536 | 2840035 | 2224796 | 2223297 | 2052915 | 2054414 | 1566761 | 1568260 | 2960311 | 2961810 | 2870095 | 2871594 | 2907109 | 2908608 | 2865034 | 2866533 | 2719838 | 2721337 |
| 3105 BPSS2144  |                  | 2840477 | 2840677 | 2222855 | 2222655 | 2054857 | 2055057 | 1568703 | 1568903 | 2962252 | 2962452 | 2872037 | 2872237 | 2909051 | 2909251 | 2866975 | 2867175 | 2721780 | 2721980 |
| 3106 BPSS2145  |                  | 2842442 | 2840754 | 2220890 | 2222578 | 2056822 | 2055134 | 1570668 | 1568980 | 2964217 | 2962529 | 2874002 | 2872314 | 2911016 | 2909328 | 2868940 | 2867252 | 2723745 | 2722057 |
| 3107 BPSS2146  |                  | 2843762 | 2842752 | 2219570 | 2220580 | 2058114 | 2057104 | 1571960 | 1570950 | 2965518 | 2964508 | 2875343 | 2874333 | 2912308 | 2911298 | 2870232 | 2869222 | 2725044 | 2724034 |
| 3108 BPSS2147  |                  | 2844217 | 2843966 | 2219115 | 2219366 | 2058569 | 2058318 | 1572415 | 1572164 | 2965973 | 2965722 | 2875798 | 2875547 | 2912763 | 2912512 | 2870687 | 2870436 | 2725499 | 2725248 |
| 3109 BPSS2148  |                  |         |         |         |         |         |         |         |         |         |         |         |         |         |         |         |         |         |         |
| 3110 BPSS2148a |                  |         |         |         |         |         |         |         |         |         |         |         |         |         |         |         |         |         |         |
| 3111 BPSS2149  |                  |         |         |         |         | 2060829 | 2059321 | 1574675 | 1573167 |         |         | 2878058 | 2876550 | 2915023 | 2913515 |         |         | 2727759 | 2726251 |
| 3112 BPSS2150  |                  |         |         |         |         | 2061698 | 2060829 | 1575544 | 1574675 |         |         | 2878927 | 2878058 | 2915892 | 2915023 |         |         | 2728628 | 2727759 |
| 3113 BPSS2151  |                  |         |         |         |         | 2062993 | 2061698 | 1576839 | 1575544 |         |         | 2880225 | 2878927 | 2917187 | 2915892 |         |         | 2729923 | 2728628 |
| 3114 BPSS2152  |                  |         |         |         |         | 2064220 | 2063057 | 1578066 | 1576903 |         |         | 2881450 | 2880287 | 2918414 | 2917251 |         |         | 2731137 | 2729974 |
| 3115 BPSS2153  |                  |         |         |         |         | 2064861 | 2064277 | 1578707 | 1578123 |         |         | 2882091 | 2881507 | 2919055 | 2918471 |         |         | 2731778 | 2731194 |
| 3116 BPSS2154  |                  |         |         |         |         | 2066324 | 2064897 | 1580170 | 1578743 |         |         | 2883554 | 2882127 | 2920518 | 2919091 |         |         | 2733241 | 2731814 |
|                |                  |         |         |         |         |         |         |         |         |         |         |         |         |         |         |         |         |         |         |

|               |  |         |         |         |         |         |         |         |         |         |         |         |         |         |         |         |         |         |         |
|---------------|--|---------|---------|---------|---------|---------|---------|---------|---------|---------|---------|---------|---------|---------|---------|---------|---------|---------|---------|
| 3118 BPSS2156 |  | 2844997 | 2843966 | 2218335 | 2219366 | 2069446 | 2068415 | 1583292 | 1582261 | 2966753 | 2965722 | 2886676 | 2885645 | 2923640 | 2922609 | 2871467 | 2870436 | 2736363 | 2735332 |
| 3119 BPSS2157 |  | 2846312 | 2845038 | 2217020 | 2218294 | 2070761 | 2069487 | 1584607 | 1583333 | 2968068 | 2966794 | 2887991 | 2886717 | 2924955 | 2923681 | 2872787 | 2871513 | 2737678 | 2736404 |
| 3120 BPSS2158 |  | 2847135 | 2846389 | 2216197 | 2216943 | 2071584 | 2070838 | 1585430 | 1584684 | 2968891 | 2968145 | 2888814 | 2888068 | 2925778 | 2925032 | 2873610 | 2872864 | 2738501 | 2737755 |
| 3121 BPSS2159 |  | 2847379 | 2848281 | 2215953 | 2215051 | 2071829 | 2072731 | 1585675 | 1586577 | 2969136 | 2970038 | 2889059 | 2889961 | 2926022 | 2926924 | 2873854 | 2874756 | 2738746 | 2739648 |
| 3122 BPSS2160 |  | 2848609 | 2849685 | 2214723 | 2213647 | 2073050 | 2074126 | 1586896 | 1587972 | 2970357 | 2971433 | 2890280 | 2891356 | 2927243 | 2928319 | 2875075 | 2876151 | 2739959 | 2741035 |
| 3123 BPSS2161 |  | 2849730 | 2851202 | 2213602 | 2212130 | 2074171 | 2075643 | 1588017 | 1589489 | 2971478 | 2972950 | 2891401 | 2892873 | 2928364 | 2929836 | 2876196 | 2877668 | 2741080 | 2742549 |
| 3124 BPSS2162 |  | 2852408 | 2851284 | 2210924 | 2212048 | 2076849 | 2075725 | 1590695 | 1589571 | 2974156 | 2973032 | 2894080 | 2892956 | 2931042 | 2929918 | 2878869 | 2877754 | 2743756 | 2742632 |
| 3125 BPSS2163 |  | 2853700 | 2852810 | 2209632 | 2210522 | 2078141 | 2077251 | 1591987 | 1591097 | 2975448 | 2974558 | 2895372 | 2894482 | 2932334 | 2931444 | 2880161 | 2879721 | 2745048 | 2744158 |
| 3126 BPSS2164 |  | 2853993 | 2853700 | 2209339 | 2209632 | 2078434 | 2078141 | 1592280 | 1591987 | 2975741 | 2975448 | 2895665 | 2895372 | 2932627 | 2932334 | 2880454 | 2880161 | 2745341 | 2745048 |
| 3127 BPSS2165 |  | 2854154 | 2855158 | 2209178 | 2208174 | 2078595 | 2079599 | 1592441 | 1593445 | 2975902 | 2976906 | 2895826 | 2896830 | 2932788 | 2933792 | 2880615 | 2881619 | 2745502 | 2746506 |
| 3128 BPSS2166 |  | 2855416 | 2856981 | 2207916 | 2206351 | 2080725 | 2081540 | 1593703 | 1595268 | 2977164 | 2977601 | 2897088 | 2898653 | 2934050 | 2934388 | 2881877 | 2882527 | 2747713 | 2748246 |
| 3129 BPSS2167 |  | 2858422 | 2857235 | 2204910 | 2206097 | 2082803 | 2081772 | 1596687 | 1595500 | 2979425 | 2978265 | 2900077 | 2898890 | 2935988 | 2935944 | 2884409 | 2883222 | 2749677 | 2748490 |
| 3130 BPSS2168 |  | 2858816 | 2859754 | 2204516 | 2203578 | 2083303 | 2084241 | 1597081 | 1598019 | 2979948 | 2980886 | 2900471 | 2901409 | 2936382 | 2937320 | 2884803 | 2885741 | 2750071 | 2751009 |
| 3131 BPSS2169 |  | 2859770 | 2860927 | 2203562 | 2202405 | 2084257 | 2085414 | 1598035 | 1599192 | 2980902 | 2982059 | 2901425 | 2902582 | 2937336 | 2938493 | 2885757 | 2886914 | 2751025 | 2752182 |
| 3132 BPSS2170 |  | 2861274 | 2861624 | 2202058 | 2201708 | 2085761 | 2086111 | 1599539 | 1599889 | 2982406 | 2982756 | 2902932 | 2903282 | 2938840 | 2939190 | 2887262 | 2887612 | 2752532 | 2752882 |
| 3133 BPSS2171 |  | 2862156 | 2863511 | 2201176 | 2199821 | 2086643 | 2087998 | 1600421 | 1601776 | 2983318 | 2984673 | 2903834 | 2905189 | 2939722 | 2941077 | 2888194 | 2889549 | 2753444 | 2754799 |
| 3134 BPSS2172 |  | 2864320 | 2864784 | 2199012 | 2198548 | 2088803 | 2089267 | 1602581 | 1603045 | 2985482 | 2985946 | 2905998 | 2906462 | 2941886 | 2942350 | 2890353 | 2890817 | 2755609 | 2756073 |
| 3135 BPSS2173 |  | 2867338 | 2865263 | 2195994 | 2198069 | 2091845 | 2089770 | 1605623 | 1603548 | 2988621 | 2986546 | 2909043 | 2906968 | 2944898 | 2942823 | 2893395 | 2891320 | 2758675 | 2756600 |
| 3136 BPSS2174 |  | 2868090 | 2867584 | 2195242 | 2195748 | 2092597 | 2092091 | 1606375 | 1605869 | 2989373 | 2988867 | 2909806 | 2909300 | 2945650 | 2945144 | 2894158 | 2893652 | 2759438 | 2758932 |
| 3137 BPSS2175 |  | 2869160 | 2868111 | 2194172 | 2195221 | 2093667 | 2092618 | 1607445 | 1606396 | 2990443 | 2989394 | 2910876 | 2909827 | 2946720 | 2945671 | 2895228 | 2894179 | 2760508 | 2759459 |
| 3138 BPSS2176 |  | 2871021 | 2869516 | 2192311 | 2193816 | 2095528 | 2094023 | 1609306 | 1607801 | 2992304 | 2990799 | 2912746 | 2911241 | 2948581 | 2947076 | 2897089 | 2895584 | 2762365 | 2760860 |
| 3139 BPSS2177 |  | 2871182 | 2872135 | 2192150 | 2191197 | 2095689 | 2096642 | 1609467 | 1610420 | 2992465 | 2993418 | 2912907 | 2913860 | 2948742 | 2949695 | 2897250 | 2898203 | 2762526 | 2763479 |
| 3140 BPSS2178 |  | 2872993 | 2872607 | 2190339 | 2190725 | 2097482 | 2097096 | 1611260 | 1610874 | 2994253 | 2993867 | 2914688 | 2914302 | 2950553 | 2950167 | 2899026 | 2898640 | 2764296 | 2763910 |
| 3141 BPSS2179 |  | 2873252 | 2873701 | 2190080 | 2189631 | 2097741 | 2098190 | 1611519 | 1611968 | 2994512 | 2994961 | 2914930 | 2915379 | 2950812 | 2951261 | 2899285 | 2899734 | 2764558 | 2764827 |
| 3142 BPSS2180 |  | 2874138 | 2873755 | 2189194 | 2189577 | 2098627 | 2098244 | 1612405 | 1612022 | 2995406 | 2995023 | 2915816 | 2915433 | 2951698 | 2951315 | 2900179 | 2899796 | 2765451 | 2765068 |
| 3143 BPSS2181 |  | 2874881 | 2874138 | 2188451 | 2189194 | 2099370 | 2098627 | 1613148 | 1612405 | 2996149 | 2995406 | 2916559 | 2915816 | 2952441 | 2951698 | 2900922 | 2900179 | 2766194 | 2765451 |
| 3144 BPSS2182 |  | 2875970 | 2874912 | 2187362 | 2188420 | 2100459 | 2099401 | 1614237 | 1613179 | 2997238 | 2996180 | 2917648 | 2916590 | 2953530 | 2952472 | 2902011 | 2900953 | 2767283 | 2766225 |
| 3145 BPSS2183 |  | 2877379 | 2875958 | 2185953 | 2187374 | 2101868 | 2100447 | 1615646 | 1614225 | 2998647 | 2997226 | 2919057 | 2917636 | 2954941 | 2953523 | 2903420 | 2901999 | 2768692 | 2767271 |
| 3146 BPSS2184 |  | 2878617 | 2877379 | 2184715 | 2185953 | 2103106 | 2101868 | 1616884 | 1615646 | 2999885 | 2998647 | 2920295 | 2919057 | 2956179 | 2954941 | 2904658 | 2903420 | 2769930 | 2768692 |
| 3147 BPSS2185 |  | 2879741 | 2879908 | 2183591 | 2183424 | 2104230 | 2104397 | 1618008 | 1618175 | 3001010 | 3001177 | 2921419 | 2921586 | 2957303 | 2957470 | 2905782 | 2905949 | 2771054 | 2771221 |
| 3148 BPSS2186 |  | 2880018 | 2880233 | 2183314 | 2183099 | 2104507 | 2104722 | 1618285 | 1618500 | 3001287 | 3001502 | 2921696 | 2921911 | 2957580 | 2957795 | 2906059 | 2906274 | 2771331 | 2771546 |
| 3149 BPSS2187 |  | 2880328 | 2880864 | 2183004 | 2182468 | 2104817 | 2105353 | 1618595 | 1619131 | 3001597 | 3002133 | 2922006 | 2922542 | 2957890 | 2958426 | 2906369 | 2906905 | 2771641 | 2772177 |
| 3150 BPSS2188 |  | 2880907 | 2882286 | 2182425 | 2181046 | 2105396 | 2106775 | 1619174 | 1620553 | 3002176 | 3003555 | 2922585 | 2923964 | 2958469 | 2959848 | 2906948 | 2908327 | 2772220 | 2773599 |
| 3151 BPSS2189 |  | 2882335 | 2883177 | 2180997 | 2180155 | 2106824 | 2107666 | 1620602 | 1621444 | 3003604 | 3004446 | 2924013 | 2924855 | 2959897 | 2960739 | 2908376 | 2909218 | 2773648 | 2774490 |
| 3152 BPSS2190 |  | 2883294 | 2885363 | 2180038 | 2177969 | 2107783 | 2109852 | 1621561 | 1623630 | 3004563 | 3006266 | 2924972 | 2927041 |         |         | 2909335 | 2911404 | 2774607 | 2776676 |
| 3153 BPSS2191 |  | 2885388 | 2885690 | 2177944 | 2177642 | 2109877 | 2110179 | 1623655 | 1623957 | 3006370 | 3006546 | 2927066 | 2927368 | 2962936 | 2963238 | 2911429 | 2911731 | 2776701 | 2777003 |
| 3154 BPSS2192 |  | 2885784 | 2886971 | 2177548 | 2176361 | 2110273 | 2111460 | 1624051 | 1625238 | 3006640 | 3007827 | 2927462 | 2928649 | 2963332 | 2964519 | 2911825 | 2913012 | 2777097 | 2778284 |
| 3155 BPSS2193 |  | 2886998 | 2887537 | 2176334 | 2175795 | 2111487 | 2112026 | 1625265 | 1625804 | 3007854 | 3008393 | 2928676 | 2929215 | 2964546 | 2965085 | 2913039 | 2913578 | 2778311 | 2778850 |
| 3156 BPSS2194 |  | 2887537 | 2887995 | 2175795 | 2175337 | 2112026 | 2112484 | 1625804 | 1626262 | 3008393 | 3008851 | 2929215 | 2929673 | 2965085 | 2965543 | 2913578 | 2914036 | 2778850 | 2779308 |
| 3157 BPSS2195 |  | 2888021 | 2889226 | 2175311 | 2174106 | 2112510 | 2113715 | 1626288 | 1627493 | 3008877 | 3010082 | 2929699 | 2930904 | 2965569 | 2966774 | 2914062 | 2915267 | 2779334 | 2780539 |
| 3158 BPSS2196 |  | 2889251 | 2890615 | 2174081 | 2172717 | 2113740 | 2115104 | 1627518 | 1628882 | 3010107 | 3011471 | 2930929 | 2932293 | 2966799 | 2968163 | 2915292 | 2916656 | 2780564 | 2781928 |
| 3159 BPSS2197 |  | 2890630 | 2891619 | 2172702 | 2171713 | 2115119 | 2116108 | 1628897 | 1629886 | 3011486 | 3012475 | 2932308 | 2933297 | 2968178 | 2969167 | 2916671 | 2917660 | 2781943 | 2782932 |
| 3160 BPSS2198 |  | 2891677 | 2892633 | 2171655 | 2170699 | 2116166 | 2117122 | 1629944 | 1630900 | 3012533 | 3013489 | 2933355 | 2934311 | 2969225 | 2970181 | 2917718 | 2918674 | 2782990 | 2783946 |
| 3161 BPSS2199 |  | 2893513 | 2893040 | 2169819 | 2170292 | 2118049 | 2117576 | 1631827 | 1631354 | 3014391 | 3013918 | 2935211 | 2934738 | 2971092 | 2970619 | 2919559 | 2919086 | 2784875 | 2784402 |
| 3162 BPSS2200 |  | 2893748 | 2894962 | 2169584 | 2168370 | 2118284 | 2119498 | 1632062 | 1633276 | 3014626 | 3015840 | 2935446 | 2936660 | 2971327 | 2972541 | 2919794 | 2920066 | 2785110 | 2786324 |
| 3163 BPSS2201 |  | 2895189 | 2895578 | 2168143 | 2167754 | 2119725 | 2120114 | 1633503 | 1633892 | 3016120 | 3016509 | 2936887 | 2937276 | 2972855 | 2973244 | 2921242 | 2921631 | 2786551 | 2786940 |
| 3164 BPSS2202 |  | 2895749 | 2896819 | 2167583 | 2166513 | 2120285 | 2121355 | 1634063 | 1635133 | 3016680 | 3017750 | 2937447 | 2938517 | 2973415 | 2974485 | 2921802 | 2922872 | 2787111 | 2788181 |
| 3165 BPSS2203 |  | 2896902 | 2898329 | 2166430 | 2165003 | 2121438 | 2122865 | 1635216 | 1636643 | 3017833 | 3019260 | 2938600 | 2940027 | 2974568 | 2975995 | 2922955 | 2924382 | 2788264 | 2789691 |
| 3166 BPSS2204 |  | 2899176 | 2898412 | 2164156 | 2164920 | 2123712 | 2122948 | 1637490 | 1636726 | 3020107 | 3019343 | 2940839 | 2940075 | 2976842 | 2976078 | 2925229 | 2924465 | 2790538 | 2789774 |
| 3167 BPSS2205 |  | 2901208 | 2899673 | 2162124 | 2163659 | 2125744 | 2124209 | 1639522 | 1637987 | 3022139 | 3020604 | 2942871 | 2941336 | 2978874 | 2977339 | 2927261 | 2925726 | 2792570 | 2791035 |
| 3168 BPSS2206 |  | 2902512 | 2901208 | 2160820 | 2162124 | 2127048 | 2125744 | 1640826 | 1639522 | 3023443 | 3022139 | 2944175 | 2942871 | 2980178 | 2978874 | 2928565 | 2927261 | 2793874 | 2792570 |
| 3169 BPSS2207 |  | 2902641 | 2903552 | 2160691 | 2159780 | 2127177 | 2128088 | 1640955 | 1641866 | 3023572 | 3024483 | 2944304 | 2945215 | 2980307 | 298121  |         |         |         |         |

|                |                                      |         |         |         |         |         |         |         |         |         |         |         |         |         |         |         |         |         |         |
|----------------|--------------------------------------|---------|---------|---------|---------|---------|---------|---------|---------|---------|---------|---------|---------|---------|---------|---------|---------|---------|---------|
| 3176 BPSS2213  | BURPS1710A_A2303<br>BURPS1710b_A1352 | 2914563 | 2914063 | 2148769 | 2149269 | 2139162 | 2138662 | 1652939 | 1652439 | 3035397 | 3034897 | 2956119 | 2955619 | 2992186 | 2991686 | 2940518 | 2940018 | 2805759 | 2805259 |
| 3177 BPSS2214  |                                      | 2916712 | 2914589 | 2146620 | 2148743 | 2141311 | 2139188 | 1655088 | 1652965 | 3037546 | 3035423 | 2958268 | 2956145 | 2994335 | 2992212 | 2942667 | 2940544 | 2807908 | 2805785 |
| 3178 BPSS2215  |                                      | 2917279 | 2916851 | 2146053 | 2146481 | 2141878 | 2141450 | 1655655 | 1655227 | 3038113 | 3037685 | 2958835 | 2958407 | 2994975 | 2994547 | 2943234 | 2942806 |         |         |
| 3179 BPSS2216  |                                      | 2917475 | 2917317 | 2145857 | 2146015 | 2142074 | 2141916 | 1655851 | 1655693 | 3038309 | 3038151 | 2959031 | 2958873 | 2995171 | 2995013 | 2943430 | 2943272 | 2808537 | 2808379 |
| 3180 BPSS2217  |                                      | 2917708 | 2917523 | 2145624 | 2145809 | 2142307 | 2142122 | 1656084 | 1655899 | 3038542 | 3038357 | 2959264 | 2959079 | 2995404 | 2995219 | 2943663 | 2943478 | 2808770 | 2808585 |
| 3181 BPSS2218  |                                      | 2919251 | 2917779 | 2144081 | 2145553 | 2143852 | 2142380 | 1657625 | 1656153 | 3040085 | 3038613 | 2960807 | 2959335 | 2996945 | 2995473 | 2945204 | 2943732 | 2810313 | 2808841 |
| 3182 BPSS2219  |                                      | 2919933 | 2920688 | 2143399 | 2142644 | 2144556 | 2145311 | 1658329 | 1659084 | 3040762 | 3041517 | 2961647 | 2962402 | 2997642 | 2998397 | 2945881 | 2946636 | 2810988 | 2811743 |
| 3183 BPSS2220  |                                      | 2920993 | 2921643 | 2142339 | 2141689 | 2145616 | 2146266 | 1659389 | 1660039 | 3041822 | 3042472 | 2962707 | 2963357 | 2998702 | 2999352 | 2946941 | 2947591 | 2812048 | 2812698 |
| 3184 BPSS2221  |                                      | 2922525 | 2922019 | 2140794 | 2141300 | 2147272 | 2146766 | 1661045 | 1660539 | 3043393 | 3042887 | 2964161 | 2963655 | 3000182 | 2999676 | 2948408 | 2947902 | 2813572 | 2813066 |
| 3185 BPSS2222  |                                      | 2923668 | 2922994 | 2139651 | 2140325 | 2148324 | 2147650 | 1662097 | 1661423 | 3044445 | 3043771 | 2965217 | 2964540 | 3001324 | 3000650 | 2949551 | 2948877 | 2814627 | 2814040 |
| 3186 BPSS2223  |                                      | 2924837 | 2923983 | 2138482 | 2139336 | 2149493 | 2148639 | 1663266 | 1662412 | 3045614 | 3044760 | 2966386 | 2965532 | 3002493 | 3001639 | 2950720 | 2949866 | 2817499 | 2816645 |
| 3187 BPSS2224  |                                      | 2925551 | 2925237 | 2137768 | 2138082 | 2150194 | 2149880 | 1663967 | 1663653 | 3046345 | 3046031 | 2967085 | 2966792 | 3003194 | 3002880 | 2951421 | 2951107 | 2818213 | 2817899 |
| 3188 BPSS2225  |                                      | 2925923 | 2925570 | 2137396 | 2137749 | 2150566 | 2150213 | 1664339 | 1663986 | 3046717 | 3046364 | 2967448 | 2967104 | 3003566 | 3003213 | 2951793 | 2951440 | 2818585 | 2818232 |
| 3189           |                                      |         |         |         |         | 2152229 | 2151768 |         |         |         |         |         |         |         |         |         |         |         |         |
| 3190           |                                      |         |         |         |         |         |         | 1665537 | 1665998 |         |         |         |         |         |         |         |         |         |         |
| 3191 BPSS2226  |                                      | 2928024 | 2927728 | 2135295 | 2135591 | 2152619 | 2152323 | 1666388 | 1666092 |         |         | 2969538 | 2969242 | 3005615 | 3005319 | 2953833 | 2953537 | 2820670 | 2820374 |
| 3192 BPSS2227  |                                      | 2928317 | 2928562 | 2135002 | 2134757 | 2152912 | 2153157 | 1666681 | 1666926 | 3048373 | 3048618 | 2969831 | 2970076 | 3005908 | 3006153 | 2954126 | 2954371 | 2821051 | 2821296 |
| 3193 BPSS2227A |                                      | 2928670 | 2928801 | 2134649 | 2134518 | 2153282 | 2153413 | 1667051 | 1667182 | 3048726 | 3048857 | 2970197 | 2970328 | 3006278 | 3006409 | 2954479 | 2954610 | 2821404 | 2821535 |
| 3194 BPSS2228  |                                      | 2929927 | 2929286 | 2133392 | 2134033 | 2154539 | 2153898 | 1668308 | 1667667 | 3049993 | 3049352 | 2971454 | 2970813 | 3007535 | 3006894 | 2955736 | 2955095 | 2822661 | 2822020 |
| 3195           |                                      |         |         |         |         | 2154918 | 2154730 |         |         |         |         |         |         |         |         |         |         |         |         |
| 3196           |                                      |         |         |         |         |         |         | 1668499 | 1668687 |         |         |         |         |         |         |         |         |         |         |
| 3197 BPSS2229  | BURPS1710A_A2310<br>BURPS1710b_A1359 | 2930515 | 2930943 | 2132804 | 2132376 | 2155127 | 2155555 | 1668896 | 1669324 | 3050630 | 3051058 | 2972062 | 2972490 | 3008118 | 3008546 | 2956324 | 2956752 | 2823233 | 2823661 |
| 3198 BPSS2230  |                                      | 2931092 | 2931580 | 2132227 | 2131739 | 2155704 | 2156192 | 1669473 | 1669961 | 3051207 | 3051695 | 2972639 | 2973127 | 3008695 | 3009183 | 2956901 | 2957389 | 2823810 | 2824298 |
| 3199 BPSS2231  |                                      | 2932249 | 2931803 | 2131070 | 2131516 | 2156860 | 2156414 | 1670629 | 1670183 | 3052364 | 3051918 | 2973797 | 2973351 | 3009852 | 3009406 | 2958058 | 2957612 | 2824967 | 2824521 |
| 3200 BPSS2232  |                                      | 2932358 | 2932711 | 2130961 | 2130608 | 2156969 | 2157322 | 1670738 | 1671091 | 3052473 | 3052826 | 2973906 | 2974259 | 3009961 | 3010314 | 2958167 | 2958520 | 2825076 | 2825429 |
| 3201 BPSS2233  |                                      | 2932711 | 2933379 | 2130608 | 2129940 | 2157322 | 2157990 | 1671091 | 1671759 | 3052826 | 3053494 | 2974259 | 2974927 | 3010314 | 3010982 | 2958520 | 2959188 | 2825431 | 2826096 |
| 3202 BPSS2234  |                                      | 2933461 | 2934912 | 2129858 | 2128407 | 2158072 | 2159541 | 1671841 | 1673310 | 3053576 | 3055027 | 2974998 | 2976458 | 3011064 | 3012524 | 2959270 | 2960730 | 2826181 | 2827641 |
| 3203 BPSS2235  |                                      | 2936200 | 2935028 | 2127119 | 2128291 | 2160829 | 2159657 | 1674598 | 1673426 | 3056315 | 3055143 | 2977746 | 2976574 | 3013752 | 3012640 | 2962018 | 2960846 | 2828929 | 2827757 |
| 3204 BPSS2236  |                                      | 2937254 | 2936616 | 2126065 | 2126703 | 2162039 | 2161401 | 1675697 | 1675059 | 3057370 | 3056732 | 2978800 | 2978162 | 3014537 | 3013899 | 2963073 | 2962435 | 2829991 | 2829353 |
| 3205 BPSS2237  |                                      | 2937947 | 2937345 | 2125372 | 2125974 | 2162732 | 2162130 | 1676390 | 1675788 | 3058063 | 3057461 | 2979493 | 2978891 | 3015230 | 3014628 | 2963766 | 2963164 | 2830673 | 2830071 |
| 3206 BPSS2238  |                                      | 2938842 | 2937988 | 2124477 | 2125331 | 2163627 | 2162773 | 1677285 | 1676431 | 3058958 | 3058104 | 2980388 | 2979534 | 3016059 | 3015271 | 2964661 | 2963807 | 2831568 | 2830714 |
| 3207 BPSS2239  |                                      | 2939619 | 2939056 | 2123700 | 2124263 | 2164404 | 2163841 | 1678062 | 1677499 | 3059735 | 3059172 | 2981165 | 2980602 |         |         | 2965438 | 2964875 | 2832345 | 2831782 |
| 3208 BPSS2240  |                                      | 2940174 | 2939866 | 2123145 | 2123453 | 2164959 | 2164651 | 1678617 | 1678309 | 3060233 | 3059925 | 2981736 | 2981428 | 3016641 | 3016333 | 2966002 | 2965694 | 2832906 | 2832598 |
| 3209           |                                      |         |         | 2123536 | 2123709 |         |         |         |         |         |         |         |         |         |         |         |         |         |         |
| 3210 BPSS2241  |                                      | 2940538 | 2940332 | 2122781 | 2122987 | 2165323 | 2165117 | 1678981 | 1678775 | 3060597 | 3060391 | 2982100 | 2981894 | 3017005 | 3016799 | 2966366 | 2966160 | 2833270 | 2833064 |
| 3211 BPSS2242  |                                      | 2941360 | 2940548 | 2121959 | 2122771 | 2166145 | 2165333 | 1679803 | 1678991 | 3061419 | 3060607 | 2982922 | 2982110 | 3017827 | 3017015 | 2967188 | 2966376 | 2834092 | 2833280 |
| 3212 BPSS2243  |                                      | 2941879 | 2941391 | 2121440 | 2121928 | 2166676 | 2166176 | 1680334 | 1679834 | 3061938 | 3061450 | 2983441 | 2982953 | 3018358 | 3017858 | 2967719 | 2967219 | 2834611 | 2834123 |
| 3213 BPSS2244  |                                      | 2942110 | 2943495 | 2121209 | 2119824 | 2166907 | 2168292 | 1680565 | 1681950 | 3062169 | 3063554 | 2983672 | 2985057 | 3018589 | 3019974 | 2967950 | 2969335 | 2834842 | 2836227 |
| 3214 BPSS2245  |                                      | 2943495 | 2944538 | 2119824 | 2118781 | 2168292 | 2169335 | 1681950 | 1682993 | 3063554 | 3064597 | 2985057 | 2986100 | 3019974 | 3021017 | 2969335 | 2970378 | 2836227 | 2837270 |
| 3215 BPSS2246  |                                      | 2946988 | 2944673 | 2116331 | 2118646 | 2171779 | 2169470 | 1685437 | 1683128 | 3067041 | 3064732 | 2988550 | 2986235 | 3023461 | 3021152 | 2972822 | 2970513 | 2839720 | 2837405 |
| 3216 BPSS2247  |                                      | 2947120 | 2947809 | 2116199 | 2115510 | 2171911 | 2172600 | 1685569 | 1686258 | 3067173 | 3067862 | 2988682 | 2989371 | 3023593 | 3024282 | 2972954 | 2973643 | 2839852 | 2840541 |
| 3217 BPSS2248  |                                      | 2947830 | 2948735 | 2115489 | 2114584 | 2172621 | 2173526 | 1686279 | 1687184 | 3067883 | 3068788 | 2989392 | 2990297 | 3024303 | 3024821 | 2973664 | 2974569 | 2840562 | 2841467 |
| 3218 BPSS2249  |                                      | 2950132 | 2948765 | 2113187 | 2114554 | 2174923 | 2173556 | 1688581 | 1687214 | 3070185 | 3068818 | 2991694 | 2990327 | 3026607 | 3025240 | 2975966 | 2974599 | 2842864 | 2841497 |
| 3219 BPSS2250  |                                      | 2950521 | 2951486 | 2112798 | 2111833 | 2175312 | 2176277 | 1688970 | 1689935 | 3070574 | 3071536 | 2992083 | 2993048 | 3026996 | 3027961 | 2976355 | 2977320 | 2843253 | 2844218 |
| 3220 BPSS2251  |                                      | 2952691 | 2951744 | 2110628 | 2111575 | 2177465 | 2176518 | 1691122 | 1690175 | 3072726 | 3071779 | 2994256 | 2993309 | 3029148 | 3028201 | 2978525 | 2977578 | 2845405 | 2844458 |
| 3221 BPSS2252  |                                      | 2953796 | 2952684 | 2109523 | 2110635 | 2178570 | 2177458 | 1692227 | 1691115 | 3073831 | 3072719 | 2995361 | 2994249 | 3030253 | 3029141 | 2979630 | 2978518 | 2846510 | 2845398 |
| 3222 BPSS2253  |                                      | 2954794 | 2953796 | 2108525 | 2109523 | 2179568 | 2178570 | 1693225 | 1692227 | 3074829 | 3073831 | 2996359 | 2995361 | 3031251 | 3030253 | 2980628 | 2979630 | 2847508 | 2846510 |
| 3223 BPSS2254  |                                      | 2956545 | 2954794 | 2106774 | 2108525 | 2181319 | 2179568 | 1694976 | 1693225 | 3076580 | 3074829 | 2998110 | 2996359 | 3033002 | 3031251 | 2982379 | 2980628 | 2849259 | 2847508 |
| 3224 BPSS2255  |                                      | 2958417 | 2956552 | 2104902 | 2106767 | 2183254 | 2182298 | 1696911 | 1695955 | 3078452 | 3076587 | 2999982 | 2998117 | 3034865 | 3033009 | 2984296 | 2983337 | 2851131 | 2849266 |
| 3225 BPSS2256  |                                      | 2959037 | 2958417 | 2104282 | 2104902 | 2183874 | 2183254 | 1697531 | 1696911 | 3079072 | 3078452 | 3000614 | 2999982 | 3035485 | 3034865 | 2984916 | 2984296 | 2851763 | 2851131 |
| 3226 BPSS2257  |                                      | 2959783 | 2959031 | 2103536 | 2104288 | 2184620 | 2183868 | 1698277 | 1697525 | 3079818 | 3079066 | 3001360 | 3000608 | 3036231 | 3035479 | 2985662 | 2984910 | 2852509 | 2851757 |
| 3227           |                                      | 2959935 | 2961239 | 2102080 | 2103384 |         |         |         |         |         |         |         |         |         |         |         |         |         |         |
| 3228 BPSS2258  | Bp_ch2_15_JSBr                       | 2961803 | 2961312 | 2101516 | 2102007 | 2185327 | 2184836 | 1698984 | 1698493 | 3080525 | 3080034 | 3002067 | 3001576 | 3036938 | 3036447 | 2986369 | 2985878 | 2853216 | 2852725 |
| 3229 BPSS2259  |                                      | 2964744 | 2961781 | 2098575 | 2101538 | 2188268 | 2185305 | 1701925 | 1698962 | 3083466 | 3080503 | 3005008 | 3002045 | 3039879 | 3036916 | 2989310 | 2986347 | 2856142 |         |

|               |                   |         |         |         |         |         |         |         |         |         |         |         |         |         |         |         |         |         |         |
|---------------|-------------------|---------|---------|---------|---------|---------|---------|---------|---------|---------|---------|---------|---------|---------|---------|---------|---------|---------|---------|
| 3234 BPSS2263 | BURPS1710A_A2351  | 2969121 | 2968879 | 2094198 | 2094440 | 2192841 | 2192599 | 1706498 | 1706256 | 3088080 | 3087838 | 3009406 | 3009164 | 3044468 | 3044226 | 2994041 | 2993799 | 2860538 | 2860296 |
| 3235          |                   |         |         |         |         | 2192941 | 2193159 |         |         |         |         |         |         |         |         |         |         |         |         |
| 3236 BPSS2264 |                   | 2970328 | 2969444 | 2092991 | 2093875 | 2194031 | 2193147 | 1707688 | 1706804 | 3089238 | 3088354 | 3010564 | 3009680 | 3045674 | 3044790 | 2995224 | 2994340 | 2861712 | 2860828 |
| 3237 BPSS2265 |                   | 2971818 | 2970472 | 2091501 | 2092847 | 2195521 | 2194175 | 1709178 | 1707832 | 3090728 | 3089382 | 3012054 | 3010708 | 3047164 | 3045818 | 2996714 | 2995368 | 2863202 | 2861856 |
| 3238 BPSS2266 |                   | 2972914 | 2972102 | 2090405 | 2091217 | 2196617 | 2195805 | 1710274 | 1709462 | 3091824 | 3091012 | 3013150 | 3012338 | 3048260 | 3047448 | 2997810 | 2996998 | 2864298 | 2863486 |
| 3239 BPSS2267 |                   | 2974385 | 2973135 | 2088934 | 2090184 | 2198088 | 2196838 | 1711745 | 1710495 | 3093295 | 3092045 | 3014621 | 3013371 | 3049731 | 3048481 | 2999281 | 2998031 | 2865769 | 2864519 |
| 3240 BPSS2268 |                   | 2975221 | 2974751 | 2088098 | 2088568 | 2198924 | 2198454 | 1712581 | 1712111 | 3094131 | 3093661 | 3015457 | 3014987 | 3050567 | 3050097 | 3000117 | 2999647 | 2866605 | 2866135 |
| 3241 BPSS2269 |                   | 2977285 | 2976131 | 2086034 | 2087188 | 2200988 | 2199834 | 1714645 | 1713491 | 3096195 | 3095041 | 3017515 | 3016361 | 3052631 | 3051477 | 3002181 | 3001027 | 2868663 | 2867509 |
| 3242 BPSS2270 |                   | 2979338 | 2977941 | 2083981 | 2085378 | 2203041 | 2201644 | 1716698 | 1715301 | 3098248 | 3096851 | 3019568 | 3018171 | 3054684 | 3053287 | 3004234 | 3002837 | 2870716 | 2869319 |
| 3243 BPSS2271 |                   | 2980800 | 2979346 | 2082519 | 2083973 | 2204497 | 2203049 | 1718154 | 1716706 | 3099704 | 3098256 | 3021030 | 3019576 | 3056140 | 3054692 | 3005690 | 3004242 | 2872172 | 2870724 |
| 3244 BPSS2272 | BURPS1106B_2101   | 2981845 | 2980805 | 2081474 | 2082514 | 2205542 | 2204502 | 1719199 | 1718159 | 3100749 | 3099709 | 3022075 | 3021035 | 3057185 | 3056145 | 3006735 | 3005695 | 2873217 | 2872177 |
| 3245 BPSS2273 |                   | 2983083 | 2981854 | 2080236 | 2081465 | 2206780 | 2205551 | 1720437 | 1719208 | 3101987 | 3100758 | 3023313 | 3022084 | 3058423 | 3057194 | 3007973 | 3006744 | 2874455 | 2873226 |
| 3246 BPSS2274 |                   | 2984336 | 2984773 | 2078983 | 2078546 | 2208033 | 2208470 | 1721690 | 1722127 | 3103240 | 3103677 | 3024566 | 3025003 | 3059676 | 3060113 | 3009226 | 3009663 | 2875706 | 2876143 |
| 3247          |                   |         |         | 2079902 | 2078955 |         |         |         |         |         |         |         |         |         |         |         |         |         |         |
| 3248 BPSS2275 |                   | 2986226 | 2985114 | 2077093 | 2078205 | 2209890 | 2208778 | 1723547 | 1722435 | 3105130 | 3104018 | 3026456 | 3025344 | 3061533 | 3060421 | 3011116 | 3010004 | 2877547 | 2876435 |
| 3249 BPSS2276 |                   | 2986524 | 2987456 | 2076795 | 2075863 | 2210188 | 2211120 | 1723845 | 1724777 | 3105428 | 3106360 | 3026754 | 3027686 | 3061831 | 3062763 | 3011414 | 3012346 | 2877845 | 2878777 |
| 3250 BPSS2277 |                   | 2987634 | 2988062 | 2075685 | 2075257 | 2211298 | 2211726 | 1724955 | 1725383 | 3106538 | 3106966 | 3027864 | 3028292 | 3062942 | 3063370 | 3012524 | 3012952 | 2878955 | 2879383 |
| 3251 BPSS2278 |                   | 2988356 | 2990020 | 2074963 | 2073299 | 2212020 | 2213684 | 1725677 | 1727341 | 3107260 | 3108924 | 3028586 | 3030250 | 3063664 | 3065328 | 3013246 | 3014910 | 2879677 | 2881341 |
| 3252 BPSS2279 |                   | 2992580 | 2990310 | 2070739 | 2073009 | 2216250 | 2213980 | 1729907 | 1727637 | 3111484 | 3109214 | 3032825 | 3030555 | 3067894 | 3065624 | 3017470 | 3015200 | 2883911 | 2881641 |
| 3253          |                   |         |         |         |         |         |         |         |         | 3111992 | 3112444 |         |         |         |         |         |         |         |         |
| 3254          | BURPS406E_0485    |         |         |         |         |         |         |         |         |         |         |         |         |         |         |         |         |         |         |
|               | BURPSS13_0197     |         |         |         |         |         |         |         |         |         |         |         |         |         |         | 3017978 | 3018430 |         |         |
| 3255 BPSS2280 | BURPS1655_0079    | 2993108 | 2992716 | 2070211 | 2070603 | 2216778 | 2216386 | 1730435 | 1730043 | 3112012 | 3111620 | 3033353 | 3032961 | 3068422 | 3068030 | 3017998 | 3017606 | 2884439 | 2884047 |
| 3256 BPSS2281 |                   | 2994463 | 2995731 | 2068856 | 2067588 | 2218133 | 2219401 | 1731790 | 1733058 | 3113428 | 3114690 | 3034737 | 3035999 | 3069777 | 3071045 | 3019414 | 3020676 | 2885821 | 2887083 |
| 3257 BPSS2282 |                   | 2995950 | 2997788 | 2067369 | 2065531 | 2219620 | 2221458 | 1733277 | 1735115 | 3114909 | 3116747 | 3036254 | 3038092 | 3071263 | 3073101 | 3020883 | 3022721 | 2887314 | 2889152 |
| 3258 BPSS2283 |                   | 2997968 | 2999674 | 2065351 | 2063645 | 2221638 | 2223344 | 1735295 | 1737001 | 3116927 | 3118633 | 3038270 | 3039976 | 3073281 | 3074672 | 3022901 | 3024607 | 2889332 | 2891038 |
| 3259          |                   |         |         |         |         |         |         |         |         |         |         |         |         |         |         |         |         | 2891038 | 2891466 |
| 3260 BPSS2284 |                   | 3000194 | 3001222 | 2063125 | 2062097 | 2223858 | 2224886 | 1737515 | 1738543 | 3119161 | 3120189 | 3040446 | 3041474 | 3075352 | 3076380 | 3025135 | 3026163 | 2891604 | 2892632 |
| 3261 BPSS2285 |                   | 3001222 | 3003051 | 2062097 | 2060268 | 2224886 | 2226715 | 1738543 | 1740372 | 3120189 | 3122048 | 3041474 | 3043303 | 3076380 | 3078209 | 3026163 | 3027992 | 2892632 | 2894458 |
| 3262 BPSS2286 |                   | 3004028 | 3003522 | 2059286 | 2059792 | 2227691 | 2227176 | 1741348 | 1740833 | 3123024 | 3122509 | 3044286 | 3043771 | 3079185 | 3078670 | 3028965 | 3028450 | 2895435 | 2894929 |
| 3263 BPSS2287 |                   | 3004411 | 3005061 | 2058903 | 2058253 | 2228081 | 2228731 | 1741738 | 1742388 | 3123409 | 3124059 | 3044671 | 3045321 | 3079560 | 3080210 | 3029350 | 3030000 | 2895828 | 2896478 |
| 3264 BPSS2288 |                   | 3005566 | 3005135 | 2057748 | 2058179 | 2229238 | 2228807 | 1742895 | 1742464 | 3124564 | 3124133 | 3045826 | 3045395 | 3080715 | 3080284 | 3030505 | 3030074 | 2896983 | 2896552 |
| 3265 BPSS2289 | BURPS1106B_2078   | 3007079 | 3005955 | 2056235 | 2057359 | 2230771 | 2229647 | 1744428 | 1743304 | 3126097 | 3124973 |         |         | 3082249 | 3081125 | 3032038 | 3030914 | 2898517 | 2897393 |
| 3266          |                   |         |         | 2057443 | 2057751 |         |         |         |         |         |         |         |         |         |         |         |         |         |         |
| 3267 BPSS2290 |                   | 3008964 | 3007162 | 2054350 | 2056152 | 2232656 | 2230854 | 1746313 | 1744511 | 3127982 | 3126180 |         |         | 3084134 | 3082332 | 3033922 | 3033299 | 2900402 | 2898600 |
| 3268 BPSS2291 |                   | 3012031 | 3009269 | 2051283 | 2054045 | 2235723 | 2232961 | 1749380 | 1746618 | 3131154 | 3128908 |         |         | 3087190 | 3084428 | 3037000 | 3034238 | 2903480 | 2900718 |
| 3269 BPSS2292 |                   | 3012195 | 3013253 | 2051119 | 2050061 | 2235887 | 2236945 | 1749544 | 1750602 |         |         |         |         |         |         | 3037164 | 3038222 | 2903644 | 2904702 |
| 3270 BPSS2293 |                   | 3013359 | 3014339 | 2049955 | 2048975 | 2237051 | 2238031 | 1750708 | 1751688 | 3132537 | 3133517 |         |         | 3088578 | 3089558 | 3038328 | 3039308 | 2904808 | 2905788 |
| 3271 BPSS2294 |                   | 3014344 | 3015189 | 2048970 | 2048125 | 2238036 | 2238881 | 1751693 | 1752538 | 3133522 | 3134367 |         |         | 3089563 | 3090408 | 3039313 | 3040158 | 2905793 | 2906638 |
| 3272 BPSS2295 |                   | 3015291 | 3016307 | 2048023 | 2047007 | 2238983 | 2239999 | 1752640 | 1753656 | 3134469 | 3135485 |         |         | 3090510 | 3091526 | 3040260 | 3041276 | 2906740 | 2907756 |
| 3273 BPSS2296 |                   | 3016477 | 3017799 | 2046837 | 2045515 | 2240169 | 2241491 | 1753826 | 1755148 | 3135655 | 3136977 |         |         | 3091696 | 3093018 | 3041446 | 3042768 | 2907926 | 2909248 |
| 3274 BPSS2297 |                   | 3017825 | 3018418 | 2045489 | 2044896 | 2241517 | 2242110 | 1755174 | 1755767 | 3137003 | 3137596 |         |         | 3093044 | 3093637 | 3042794 | 3043387 | 2909274 | 2909867 |
| 3275 BPSS2298 | BURPS2300         | 3018418 | 3019137 | 2044896 | 2044177 | 2242110 | 2242829 | 1755767 | 1756486 | 3137596 | 3138315 |         |         | 3093637 | 3094356 | 3043387 | 3044106 | 2909867 | 2910586 |
| 3276 BPSS2299 |                   | 3019723 | 3022596 | 2043591 | 2040718 | 2243401 | 2246274 | 1757058 | 1759931 | 3138894 | 3141767 | 3046834 | 3049707 | 3094928 | 3097801 | 3044706 | 3047579 | 2911201 | 2914074 |
| 3277 BPSS2300 |                   | 3022613 | 3023407 | 2040701 | 2039907 | 2246291 | 2247085 | 1759948 | 1760742 | 3141784 | 3142578 | 3049724 | 3050518 | 3097818 | 3098612 | 3047596 | 3048390 | 2914091 | 2914885 |
| 3278 BPSS2301 |                   | 3023468 | 3024415 | 2039846 | 2038899 | 2247146 | 2248093 | 1760803 | 1761750 | 3142639 | 3143586 | 3050579 | 3051526 | 3098673 | 3099620 | 3048451 | 3049398 | 2914946 | 2915455 |
| 3279 BPSS2302 |                   | 3025428 | 3026315 | 2037886 | 2036999 | 2249157 | 2250044 | 1762814 | 1763701 | 3144843 | 3145730 | 3052700 | 3053587 | 3100708 | 3101595 | 3050725 | 3051612 | 2916822 | 2917709 |
| 3280 BPSS2303 |                   | 3026783 | 3028171 | 2036531 | 2035143 | 2250512 | 2251900 | 1764169 | 1765557 | 3146210 | 3147598 | 3054090 | 3055478 | 3102063 | 3103451 | 3052092 | 3053480 | 2918176 | 2919564 |
| 3281 BPSS2304 |                   | 3030886 | 3028370 | 2032428 | 2034944 | 2254615 | 2252099 | 1768272 | 1765756 | 3150303 | 3147787 | 3058193 | 3055677 | 3106166 | 3103650 | 3056071 | 3053663 | 2922266 | 2919750 |
| 3282 BPSS2305 |                   | 3033218 | 3031653 | 2030096 | 2031661 | 2256931 | 2255366 | 1770588 | 1769023 | 3152516 | 3150951 | 3060363 | 3058798 | 3108496 | 3106931 | 3058277 | 3056712 | 2924292 | 2922727 |
| 3283 BPSS2306 |                   | 3035090 | 3033921 | 2028224 | 2029393 | 2258803 | 2257634 | 1772460 | 1771291 | 3154392 | 3153223 | 3062225 | 3061056 | 3110368 | 3109199 | 3060153 | 3058984 | 2926168 | 2924999 |
| 3284 BPSS2307 |                   | 3037001 | 3035418 | 2026313 | 2027896 | 2260715 | 2259132 | 1774372 | 1772789 | 3156304 | 3154721 | 3064141 | 3062558 | 3112280 | 3110697 | 3062041 | 3060482 | 2928168 | 2927899 |
| 3285 BPSS2308 | Bp_chr2_16_ISBma1 | 3037576 | 3037896 | 2025698 | 2025378 | 2261150 | 2261470 | 1774807 | 1775127 | 3156871 | 3157191 | 3064629 | 3064949 | 3112835 | 3113155 | 3062696 | 3063016 | 2928743 | 2929063 |
| 3286 BPSS2309 |                   | 3038666 | 3038094 | 2024608 | 2025180 | 2262240 | 2261668 | 1775897 | 1775325 | 3157961 | 3157389 | 3065719 | 3065147 | 3113925 | 3113353 | 3063786 | 3063214 | 2929833 | 2929261 |
| 3287 BPSS2310 |                   | 3039220 | 3038666 | 2024054 | 2024608 | 2262794 | 2262240 | 1776451 | 1775897 | 3158515 | 3157961 | 3066273 | 3065719 | 3114479 | 3113925 | 3064340 | 3063786 | 2930387 | 2929833 |
| 3288 BPSS2311 |                   |         |         |         |         |         |         |         |         |         |         |         |         |         |         |         |         |         |         |

|      |                 |         |         |         |         |         |         |         |         |         |         |         |         |         |         |         |         |         |         |
|------|-----------------|---------|---------|---------|---------|---------|---------|---------|---------|---------|---------|---------|---------|---------|---------|---------|---------|---------|---------|
| 3292 | BPSS2314        | 3043238 | 3044635 | 2020036 | 2018639 | 2268122 | 2269519 | 1781778 | 1783175 | 3162530 | 3163927 | 3070292 | 3071689 | 3119807 | 3121204 | 3068355 | 3069752 | 2934402 | 2935799 |
| 3293 | BPSS2315        | 3044635 | 3045279 | 2018639 | 2017995 | 2269519 | 2270163 | 1783175 | 1783819 | 3163927 | 3164571 | 3071689 | 3072333 | 3121204 | 3121848 | 3069752 | 3070396 | 2935799 | 2936443 |
| 3294 | BPSS2316        | 3046072 | 3045479 | 2017202 | 2017795 | 2270956 | 2270363 | 1784612 | 1784019 | 3165364 | 3164771 | 3073126 | 3072533 | 3122641 | 3122048 | 3071189 | 3070596 | 2937236 | 2936643 |
| 3295 | BPSS2317        | 3047129 | 3046368 | 2016145 | 2016906 | 2272013 | 2271252 | 1785669 | 1784908 | 3166421 | 3165660 | 3074183 | 3073422 | 3123698 | 3122937 | 3072246 | 3071485 | 2938293 | 2937532 |
| 3296 | BPSS2318        | 3049580 | 3047142 | 2013694 | 2016132 | 2274464 | 2272026 | 1788120 | 1785682 | 3168872 | 3166434 | 3076634 | 3074196 | 3126149 | 3123711 | 3074697 | 3072259 | 2940744 | 2938306 |
| 3297 | BPSS2319        | 3050967 | 3049900 | 2012307 | 2013374 | 2275851 | 2274784 | 1789507 | 1788440 | 3170259 | 3169192 | 3078021 | 3076954 | 3127536 | 3126469 | 3076084 | 3075017 | 2942131 | 2941064 |
| 3298 | BPSS2320        | 3051858 | 3051097 | 2011416 | 2012177 | 2276742 | 2275981 | 1790398 | 1789637 | 3171150 | 3170389 | 3078913 | 3078236 | 3128427 | 3127666 | 3076975 | 3076214 | 2943022 | 2942261 |
| 3299 | BPSS2321        | 3052319 | 3051924 | 2010955 | 2011350 | 2277203 | 2276808 | 1790859 | 1790464 | 3171611 | 3171216 | 3079374 | 3078979 | 3128888 | 3128493 | 3077436 | 3077041 | 2943483 | 2943088 |
| 3300 | BPSS2322        | 3053657 | 3052362 | 2009617 | 2010912 | 2278541 | 2277246 | 1792197 | 1790902 | 3172949 | 3171654 | 3080712 | 3079417 | 3130226 | 3128931 | 3078774 | 3077479 | 2944821 | 2943526 |
| 3301 | BPSS2323        | 3054436 | 3053657 | 2008838 | 2009617 | 2279320 | 2278541 | 1792976 | 1792197 | 3173728 | 3172949 | 3081491 | 3080712 | 3131005 | 3130226 | 3079553 | 3078774 | 2945600 | 2944821 |
| 3302 | BPSS2324        | 3055920 | 3054496 | 2007354 | 2008778 | 2280804 | 2279380 | 1794460 | 1793036 | 3175203 | 3173788 | 3082975 | 3081551 | 3132480 | 3131065 | 3081037 | 3079613 | 2947084 | 2945660 |
| 3303 | BPSS2325        | 3056621 | 3055923 | 2006653 | 2007351 | 2281505 | 2280807 | 1795161 | 1794463 | 3175904 | 3175206 | 3083676 | 3082978 | 3133181 | 3132483 | 3081738 | 3081040 | 2947785 | 2947087 |
| 3304 | BPSS2326        | 3058102 | 3056624 | 2005172 | 2006650 | 2282986 | 2281508 | 1796642 | 1795164 | 3177391 | 3175907 | 3085157 | 3083679 | 3134668 | 3133184 | 3083219 | 3081741 | 2949272 | 2947788 |
| 3305 | BPSS2327        | 3062274 | 3058156 | 2001000 | 2005118 | 2287143 | 2283025 | 1800799 | 1796681 | 3181475 | 3180066 | 3089314 | 3085196 | 3138825 | 3137749 | 3087403 | 3083285 | 2953426 | 2949308 |
| 3306 | BPSS2328        | 3065297 | 3062274 | 1994227 | 2000028 | 2293961 | 2287143 | 1807617 | 1800799 | 3188332 | 3181475 | 3096129 | 3089314 | 3145652 | 3138825 | 3094239 | 3087403 | 2960394 | 2959051 |
| 3307 | BPSS2329        | 3070797 | 3069154 | 1992477 | 1994120 | 2295699 | 2294068 | 1809355 | 1807724 | 3190079 | 3188439 | 3097879 | 3096236 | 3147390 | 3145759 | 3095977 | 3094346 | 2962141 | 2960501 |
| 3308 | BPSS2330        | 3071393 | 3074023 | 1991881 | 1989251 | 2296211 | 2298841 | 1809941 | 1812571 | 3190723 | 3193353 | 3098476 | 3101106 | 3147993 | 3150623 | 3096573 | 3099203 | 2962737 | 2965367 |
| 3309 | BPSS2331        | 3074019 | 3074972 | 1989255 | 1988302 | 2298837 | 2299817 | 1812567 | 1813547 | 3193349 | 3194218 | 3101102 | 3102127 | 3150619 | 3151617 | 3099199 | 3100176 | 2965363 | 2966379 |
| 3310 | BPSS2332        | 3075735 | 3075190 | 1987539 | 1988084 | 2300604 | 2300059 | 1814334 | 1813789 | 3195071 | 3194526 | 3102918 | 3102373 | 3152404 | 3151859 | 3101041 | 3100493 | 2967159 | 2966614 |
| 3311 | BPSS2333        | 3077125 | 3075782 | 1986149 | 1987492 | 2301994 | 2300651 | 1815724 | 1814381 | 3196461 | 3195118 | 3104308 | 3102965 | 3153794 | 3152451 | 3102431 | 3101088 | 2968549 | 2967206 |
| 3312 | BPSS2334        | 3078192 | 3077125 | 1985082 | 1986149 | 2303061 | 2301994 | 1816791 | 1815724 | 3197528 | 3196461 | 3105375 | 3104308 | 3154861 | 3153794 | 3103498 | 3102431 | 2969616 | 2968549 |
| 3313 | BPSS2335        | 3078933 | 3078208 | 1984341 | 1985066 | 2303802 | 2303077 | 1817532 | 1816807 | 3198269 | 3197544 | 3106116 | 3105391 | 3155602 | 3154877 | 3104239 | 3103514 | 2970357 | 2969632 |
| 3314 | BPSS2336        | 3079586 | 3078933 | 1983688 | 1984341 | 2304455 | 2303802 | 1818185 | 1817532 | 3198922 | 3198269 | 3106769 | 3106116 | 3156255 | 3155602 | 3104892 | 3104239 | 2971010 | 2970357 |
| 3315 | BPSS2337        | 3080403 | 3079654 | 1982871 | 1983620 | 2305272 | 2304523 | 1819002 | 1818253 | 3199739 | 3198990 | 3107586 | 3106837 | 3157072 | 3156323 | 3105709 | 3104960 | 2971827 | 2971078 |
| 3316 | BPSS2338        | 3081558 | 3080854 | 1981716 | 1982420 | 2306426 | 2305722 | 1820156 | 1819452 | 3200894 | 3200190 | 3108740 | 3108036 | 3158227 | 3157523 | 3106864 | 3106160 | 2972981 | 2972277 |
| 3317 | BPSS2339        | 3083538 | 3081568 | 1979736 | 1981706 | 2308406 | 2306436 | 1822136 | 1820166 | 3202874 | 3200904 | 3110720 | 3108750 | 3160207 | 3158237 | 3108844 | 3106874 | 2974961 | 2972991 |
| 3318 | BPSS2340        | 3084714 | 3083869 | 1978560 | 1979405 | 2309582 | 2308737 | 1823312 | 1822467 | 3204050 | 3203205 | 3111896 | 3111051 | 3161383 | 3160538 | 3110020 | 3109175 |         |         |
| 3319 | BPSS2341        | 3085259 | 3086161 | 1978015 | 1977113 | 2310127 | 2311029 | 1823857 | 1824759 | 3204595 | 3205497 | 3112441 | 3113343 | 3161928 | 3162830 | 3110565 | 3111467 | 2975889 | 2976791 |
| 3320 | BPSS2342        | 3087146 | 3086214 | 1976128 | 1977060 | 2312014 | 2311082 | 1825744 | 1824812 | 3206482 | 3205550 | 3114328 | 3113396 | 3163815 | 3162883 | 3112452 | 3111520 | 2977776 | 2976844 |
| 3321 | BPSS2343        | 3087754 | 3087146 | 1975520 | 1976128 | 2312622 | 2312014 | 1826352 | 1825744 | 3207090 | 3206482 | 3114936 | 3114328 | 3164423 | 3163815 | 3113060 | 3112452 | 2978384 | 2977776 |
| 3322 | BPSS2344        | 3088127 | 3087762 | 1975147 | 1975512 | 2312995 | 2312630 | 1826725 | 1826360 | 3207463 | 3207098 | 3115309 | 3114944 | 3164796 | 3164431 | 3113433 | 3113068 | 2978757 | 2978392 |
| 3323 | BPSS2345        | 3088633 | 3090912 | 1974641 | 1972362 | 2313501 | 2315780 | 1827231 | 1829510 | 3207969 | 3210248 | 3115815 | 3118094 | 3165302 | 3167581 | 3113939 | 3116218 | 2979263 | 2980354 |
| 3324 | BPSS2346        | 3091892 | 3091338 | 1971382 | 1971936 | 2316219 | 2316219 | 1830504 | 1829950 | 3211139 | 3210681 | 3118937 | 3118383 | 3168505 | 3167951 | 3117247 | 3116693 | 2982321 | 2981767 |
| 3325 | BPSS2347        | 3092256 | 3092858 | 1971102 | 1970500 | 2316973 | 2317569 | 1830868 | 1831470 | 187     | 789     | 3119301 | 3119903 | 3401    | 4003    | 139     | 741     | 1       | 447     |
| 3326 | BPSS2347a       | 3092842 | 3093036 | 1970516 | 1970322 | 2317553 | 2317747 | 1831454 | 1831648 | 773     | 967     | 3119887 | 3120081 | 3987    | 4181    | 725     | 919     | 431     | 625     |
| 3327 | BPSS2348        | 3093711 | 3093358 | 1969647 | 1970000 | 2318422 | 2318069 | 1832323 | 1831970 | 1642    | 1289    | 3120762 | 3120409 | 4856    | 4503    | 1594    | 1241    | 1303    | 950     |
| 3328 | BPSS2349        | 3094549 | 3095208 | 1968809 | 1968150 | 2318965 | 2319624 | 1832842 | 1833501 | 2273    | 2932    | 3121211 | 3121870 | 5425    | 6084    | 2231    | 2890    | 1829    | 2488    |
| 3329 | BPSS2350        | 3095236 | 3096300 | 1968122 | 1967058 | 2319652 | 2320716 | 1833529 | 1834593 | 2960    | 4024    | 3121898 | 3122962 | 6112    | 7176    | 2918    | 3982    | 2516    | 3580    |
| 3330 | BURPS406E_Q0007 |         |         |         |         |         |         |         |         | 4643    | 5479    |         |         |         |         |         |         |         |         |
| 3331 | BPSS2351        | 3097845 | 3096397 | 1965513 | 1966961 | 2322261 | 2320813 | 1836138 | 1834690 | 7029    | 5581    | 3124507 | 3123059 | 8721    | 7273    | 5527    | 4079    | 5125    | 3677    |
| 3332 | BURPS1655_B0114 |         |         |         |         |         |         |         |         |         |         |         |         |         |         |         |         | 6135    | 7124    |
