# Supplementary material for: The Early Stage of Bacterial Genome-Reductive Evolution in the Host
Source: PLoS Pathog. 2010 May 27;6(5):e1000922. doi: 10.1371/journal.ppat.1000922 (PMC2877748; doi:10.1371/journal.ppat.1000922)
Supplement: Table S6 — Comparison of the upstream regions of genes containing potential promoters. (2.92 MB PDF) [file ppat.1000922.s008.pdf]

Table S6. Comparison of the upstream regions of genes containing potential promoters.

| locus     | protein                                            | start_pos | end_pos  | strand | aa_len | gi       | geneID       | name               | COGs                        | Upstream sequence | irosomor | qlen | qstart | qEnd | ngth_mat          | subject | slen    | sStart  | sEnd | iden | score      | evalue | strand |
|-----------|----------------------------------------------------|-----------|----------|--------|--------|----------|--------------|--------------------|-----------------------------|-------------------|----------|------|--------|------|-------------------|---------|---------|---------|------|------|------------|--------|--------|
| BPSL0002  | hypothetical protein BPSL0002                      | 1161      | 2375 -   |        | 404    | 53717641 | 3094484 -    | COG0025P           | CAACGAACGACGGGGCAACCCCTC    | 1                 | 103      | 1    | 103    | 100  | 8m_ATCC23344_chrl | 3510148 | 3007138 | 3007240 | 100  | 515  | 1.20E-18 + |        |        |
| BPSL0003  | hypothetical protein BPSL0003                      | 3114      | 5168 -   |        | 684    | 53717642 | 3092684 -    | COG0665E, COG4121S | CGCAATTTTGTCAGGTAGTACGCTG   | 1                 | 103      | 1    | 103    | 100  | 8m_ATCC23344_chrl | 3510148 | 3004345 | 3004447 | 100  | 515  | 1.20E-18 + |        |        |
| BPSL0004  | DNA-binding protein HU-alpha                       | 5488      | 5766 +   |        | 92     | 53717643 | 3091972 hupA | NULL               | GGCCCGTGGCTGTCCACACACTAT    | 1                 | 103      | 103  | 1      | 100  | 8m_ATCC23344_chrl | 3510148 | 3004123 | 3004225 | 100  | 515  | 1.20E-18 - |        |        |
| BPSL0005  | putative cobalamin synthesis protein/P47K          | 5869      | 7209 -   |        | 446    | 53717644 | 3092685 -    | COG0523R           | CGGCTTCCCGCGCTCGTTCGCGC     | 1                 | 103      | 1    | 103    | 100  | 8m_ATCC23344_chrl | 3510148 | 2878393 | 2878495 | 100  | 515  | 1.20E-18 + |        |        |
| BPSL0006  | hypothetical protein BPSL0006                      | 7528      | 8013 -   |        | 161    | 53717645 | 3092172 -    | COG0741M           | AGGTATGATACGGGCGCGGAGAC     | 1                 | 103      | 1    | 103    | 100  | 8m_ATCC23344_chrl | 3510148 | 2877590 | 2877692 | 100  | 515  | 1.20E-18 + |        |        |
| BPSL0007  | general secretory pathway protein D                | 8395      | 10668 +  |        | 757    | 53717646 | 3091427 gspD | COG1450NU          | GATATTTCGGACATGAAAACTGCT    | 1                 | 103      | 103  | 1      | 100  | 8m_ATCC23344_chrl | 3510148 | 2877307 | 2877409 | 100  | 515  | 1.20E-18 - |        |        |
| BPSL0010  | putative general secretory pathway protein         | 13452     | 13862 -  |        | 136    | 53717649 | 3092040 gspC | NULL               | CGCGGCGGAGCCGCGCGCGCTG      | 1                 | 103      | 1    | 103    | 100  | 8m_ATCC23344_chrl | 3510148 | 2871742 | 2871844 | 100  | 515  | 1.20E-18 + |        |        |
| BPSL0011  | general secretory pathway protein G                | 14010     | 14462 +  |        | 150    | 53717650 | 3092989 gspG | COG2165NU          | CGGAGCAAGTCGGCGCTCAATG      | 1                 | 103      | 103  | 1      | 100  | 8m_ATCC23344_chrl | 3510148 | 2871692 | 2871794 | 100  | 515  | 1.20E-18 - |        |        |
| BPSL0012  | general secretory pathway protein H                | 14617     | 15096 +  |        | 159    | 53717651 | 3092990 gspH | COG2165NU          | ACCCGGCAGCATTTTCGTTTGCGAT   | 1                 | 103      | 103  | 1      | 100  | 8m_ATCC23344_chrl | 3510148 | 2871085 | 2871187 | 98   | 497  | 7.60E-18 - |        |        |
| BPSL0015  | general secretory pathway protein K                | 16391     | 17461 +  |        | 356    | 53717654 | 3094007 gspK | COG1356U           | CGCGCAGCCGCGCGCGCGCGTTC     | 1                 | 103      | 103  | 1      | 100  | 8m_ATCC23344_chrl | 3510148 | 2869311 | 2869413 | 98   | 497  | 7.60E-18 - |        |        |
| BPSL0019  | outer membrane efflux lipoprotein                  | 20480     | 22135 -  |        | 551    | 53717658 | 3092173 -    | COG1538MU          | CCCCACCCGTGATACCATCTTCG     | 1                 | 103      | 1    | 103    | 100  | 8m_ATCC23344_chrl | 3510148 | 2863368 | 2863470 | 100  | 515  | 1.20E-18 + |        |        |
| BPSL0020  | hypothetical protein BPSL0020                      | 22357     | 22629 -  |        | 90     | 53717659 | 3091507 -    | NULL               | AGTCAATGAGTACGCGCTTAATGC    | 1                 | 103      | 1    | 103    | 100  | 8m_ATCC23344_chrl | 3510148 | 2862865 | 2862967 | 100  | 515  | 1.20E-18 + |        |        |
| BPSL0021  | MarR family protein                                | 22828     | 23319 +  |        | 163    | 53717660 | 3091508 -    | COG1846K           | CTGAAATAATATGACTATGCAATTA   | 1                 | 103      | 103  | 1      | 100  | 8m_ATCC23344_chrl | 3510148 | 2862764 | 2862866 | 100  | 515  | 1.20E-18 - |        |        |
| BPSL0022  | putative transporter protein                       | 23466     | 25028 +  |        | 520    | 53717661 | 3091830 -    | NULL               | TATTTATCTGTCTGGGCAGACCTGA   | 1                 | 103      | 103  | 1      | 100  | 8m_ATCC23344_chrl | 3510148 | 2862125 | 2862227 | 100  | 515  | 1.20E-18 - |        |        |
| BPSL0023  | LysR family transcription regulatory protein       | 25088     | 26011 -  |        | 307    | 53717662 | 3091831 -    | COG0583K           | AGTATAGGATTACCGCTTCATATAA   | 1                 | 103      | 1    | 103    | 100  | 8m_ATCC23344_chrl | 3510148 | 2859482 | 2859584 | 100  | 515  | 1.20E-18 + |        |        |
| BPSL0024  | LrgA family protein                                | 26223     | 26621 +  |        | 132    | 53717663 | 3093775 -    | COG1380R           | GTAAGAAGGAGGATTCGGGAGGAC    | 1                 | 103      | 103  | 1      | 100  | 8m_ATCC23344_chrl | 3510148 | 2859368 | 2859470 | 99   | 506  | 3.00E-18 - |        |        |
| BPSL0025  | hypothetical protein BPSL0025                      | 26690     | 27412 +  |        | 240    | 53717664 | 3093776 -    | NULL               | CGTGGCAGCGTTTCCCTTTCCTCCA   | 1                 | 71       | 71   | 1      | 100  | 8m_ATCC23344_chrl | 3510148 | 2858901 | 2858971 | 100  | 355  | 2.00E-11 - |        |        |
| BPSL0029  | flagellar protein                                  | 30426     | 30920 +  |        | 164    | 53717668 | 3093248 fliO | COG3190N           | CGCGGACGCCGACGCGCGCGCGC     | 1                 | 103      | 103  | 1      | 100  | 8m_ATCC23344_chrl | 3510148 | 2855166 | 2855268 | 100  | 515  | 1.20E-18 - |        |        |
| BPSL0032  | flagellar biosynthetic protein                     | 32169     | 32951 +  |        | 260    | 53717671 | 3091494 fliR | COG1684NU          | GCCCCCGCGCGCGCGCGCTGCATC    | 1                 | 103      | 103  | 1      | 100  | 8m_ATCC23344_chrl | 3510148 | 2785436 | 2785538 | 99   | 506  | 3.00E-18 - |        |        |
| BPSL0033  | MerR family transcription regulatory protein       | 33271     | 33699 -  |        | 142    | 53717672 | 3091890 -    | COG0789K           | CGCTGTCTCTCAGTCCGAATGCTGG   | 1                 | 84       | 1    | 84     | 100  | 8m_ATCC23344_chrl | 3510148 | 2783827 | 2783910 | 100  | 420  | 2.30E-14 + |        |        |
| BPSL0034  | hypothetical protein BPSL0034                      | 33781     | 34656 +  |        | 291    | 53717673 | 3092235 -    | COG0500QR          | GCGCTTGACCTCAAGTGAGCTGAP    | 1                 | 84       | 84   | 1      | 100  | 8m_ATCC23344_chrl | 3510148 | 2783824 | 2783907 | 100  | 420  | 2.30E-14 - |        |        |
| BPSL0036  | putative transport protein                         | 35328     | 36341 +  |        | 337    | 53717675 | 3094577 -    | COG0715P           | AAGCCGCGCCGCGGGAAGGTGCGG    | 1                 | 103      | 103  | 1      | 100  | 8m_ATCC23344_chrl | 3510148 | 2782277 | 2782379 | 100  | 515  | 1.20E-18 - |        |        |
| BPSL0037  | putative ATP-binding ABC transporter protein       | 36425     | 37222 +  |        | 265    | 53717676 | 3094578 -    | COG1116P           | CAGCGCCGCGAGTTTGAACCGAGG    | 1                 | 86       | 86   | 1      | 100  | 8m_ATCC23344_chrl | 3510148 | 2781180 | 2781265 | 100  | 430  | 8.00E-15 - |        |        |
| BPSL0039  | sensor kinase protein                              | 38176     | 39555 +  |        | 459    | 53717678 | 3094682 -    | COG0642T           | AGACGATGCATCAACGAACCGGCG    | 1                 | 80       | 80   | 1      | 100  | 8m_ATCC23344_chrl | 3510148 | 2779429 | 2779508 | 100  | 400  | 1.80E-13 - |        |        |
| BPSL0041  | outer membrane porin lipoprotein precursor         | 40566     | 41693 +  |        | 375    | 53717680 | 3093987 -    | COG3203M           | CGATGGCTGGCGGCTTGACCGGCG    | 1                 | 103      | 103  | 1      | 100  | 8m_ATCC23344_chrl | 3510148 | 2777029 | 2777131 | 100  | 515  | 1.20E-18 - |        |        |
| BPSL0042  | type III restriction-modification system methylase | 42169     | 44181 +  |        | 670    | 53717681 | 3092538 -    | COG2189L           | CGCGTGCAGGATCGTACGGCTTTC    | 1                 | 103      | 103  | 1      | 100  | 8m_ATCC23344_chrl | 3510148 | 2775426 | 2775528 | 100  | 515  | 1.20E-18 - |        |        |
| BPSL0044  | putative outer membrane porin protein              | 47789     | 48889 +  |        | 366    | 53717683 | 3093858 -    | COG3203M           | GAAAGATGCCGCGCGCACGCTGCT    | 1                 | 103      | 103  | 1      | 100  | 8m_ATCC23344_chrl | 3510148 | 2769806 | 2769908 | 100  | 515  | 1.20E-18 - |        |        |
| BPSL0045  | AraC family regulatory protein                     | 49289     | 50248 +  |        | 319    | 53717684 | 3093859 -    | NULL               | ACCCGATTACGTGCGCGCAATAT     | 1                 | 103      | 103  | 1      | 100  | 8m_ATCC23344_chrl | 3510148 | 2768306 | 2768408 | 99   | 506  | 3.00E-18 - |        |        |
| BPSL0046  | ABC transport system ATP-binding protein           | 50371     | 51102 -  |        | 243    | 53717685 | 3092441 -    | COG0410E           | GCCGCGCGGACGCGCGCGGATGC     | 1                 | 103      | 1    | 103    | 100  | 8m_ATCC23344_chrl | 3510148 | 2766395 | 2766497 | 100  | 515  | 1.20E-18 + |        |        |
| BPSL0051  | putative phenylacetalddehyde dehydrogenase         | 55599     | 57104 -  |        | 501    | 53717690 | 3094922 -    | COG1012C           | GCGCCTTGCTCGCTTGTTCAACCA    | 1                 | 58       | 1    | 58     | 100  | 8m_ATCC23344_chrl | 3510148 | 2760438 | 2760495 | 98   | 281  | 4.30E-08 + |        |        |
| BPSL0054  | putative short chain dehydrogenase                 | 58418     | 59215 -  |        | 265    | 53717693 | 3093902 -    | COG1028QR          | CGCGCGCGCGCTGCGCTCGCTGCC    | 1                 | 87       | 1    | 87     | 100  | 8m_ATCC23344_chrl | 3510148 | 2758298 | 2758384 | 100  | 435  | 4.80E-15 + |        |        |
| BPSL0056  | PadR-like family transcriptional regulator         | 61697     | 62038 +  |        | 113    | 53717695 | 3093578 -    | COG1695K           | GTGTTGCTATAGTCCGCGCATGTTC   | 1                 | 103      | 103  | 1      | 100  | 8m_ATCC23344_chrl | 3510148 | 2755918 | 2756020 | 99   | 506  | 3.00E-18 - |        |        |
| BPSL0073  | DNA gyrase subunit B                               | 81428     | 83896 -  |        | 822    | 53717712 | 3091483 -    | COG0187L           | CGCGGCCCCGAAGGGGGGGAAG      | 1                 | 103      | 1    | 103    | 100  | 8m_ATCC23344_chrl | 3510148 | 2981    | 3083    | 100  | 515  | 1.20E-18 - |        |        |
| BPSL0074  | DNA polymerase III subunit beta                    | 84085     | 85188 -  |        | 367    | 53717713 | 3092204 dnaN | COG0592L           | GGCAACAATCTGCTTTGACCGCCCC   | 1                 | 103      | 1    | 103    | 100  | 8m_ATCC23344_chrl | 3510148 | 1689    | 1791    | 100  | 515  | 1.20E-18 + |        |        |
| BPSL0075  | chromosomal replication initiation protein         | 85351     | 86952 -  |        | 533    | 53717714 | 3093573 dnaA | COG0593L           | GACCGAGGACAGTCGCGACGGCGC    | 1                 | 103      | 1    | 103    | 100  | 8m_ATCC23344_chrl | 3510148 | 3510073 | 27      | 100  | 380  | 1.50E-12 + |        |        |
| BPSL0075a | SOS ribosomal protein L34                          | 87398     | 87532 -  |        | 44     | 53717715 | 3094113 -    | NULL               | ACCAAACTGTGTTATTTTCGGCGATTC | 1                 | 103      | 103  | 1      | 100  | 8m_ATCC23344_chrl | 3510148 | 3509725 | 3509827 | 100  | 515  | 1.20E-18 - |        |        |
| BPSL0076  | ribonuclease P protein component                   | 87606     | 88016 +  |        | 136    | 53717716 | 3092170 mpA  | COG0594J           | TAAGGGCGGGCGCGCGCGGTGTC     | 1                 | 79       | 79   | 1      | 100  | 8m_ATCC23344_chrl | 3510148 | 3509517 | 3509595 | 100  | 395  | 3.10E-13 - |        |        |
| BPSL0077  | hypothetical protein BPSL0077                      | 88096     | 88365 +  |        | 89     | 53717717 | 3094114 -    | NULL               | CGCGCGCAGCGCGCGCGGAGCG      | 1                 | 82       | 82   | 1      | 100  | 8m_ATCC23344_chrl | 3510148 | 3509027 | 3509108 | 97   | 392  | 4.20E-13 + |        |        |
| BPSL0079  | hypothetical protein BPSL0079                      | 90207     | 90668 -  |        | 153    | 53717719 | 3093553 -    | NULL               | CTGATTGGTTGTTCTCTTGCGAGTC   | 1                 | 103      | 1    | 103    | 100  | 8m_ATCC23344_chrl | 3510148 | 3506453 | 3506555 | 98   | 497  | 7.60E-18 + |        |        |
| BPSL0080  | tRNA modification GTPase                           | 90964     | 92367 +  |        | 467    | 53717720 | 3093677 trmE | COG0486R           | TGGTCTCGCAATCTATTCGCTGG     | 1                 | 103      | 103  | 1      | 100  | 8m_ATCC23344_chrl | 3510148 | 3506159 | 3506261 | 99   | 506  | 3.00E-18 - |        |        |
| BPSL0098  | hypothetical protein BPSL0098                      | 108943    | 109497 + |        | 184    | 53717738 | 3093577 -    | NULL               | CGCGCGCGCGGCAATTCGCGCGGA    | 1                 | 103      | 1    | 103    | 100  | 8m_ATCC23344_chrl | 3510148 | 125192  | 125294  | 100  | 515  | 1.20E-18 + |        |        |
| BPSL0102  | glutamate--cysteine ligase                         | 112703    | 114304 + |        | 533    | 53717742 | 3094155 -    | COG2918H           | TTCCGCGAGATGTAAGATGCGCCGC   | 1                 | 103      | 1    | 103    | 100  | 8m_ATCC23344_chrl | 3510148 | 128967  | 129070  | 98   | 496  | 8.40E-18 - |        |        |
| BPSL0103  | RNA polymerase sigma factor                        | 114323    | 115771 - |        | 482    | 53717743 | 3093184 -    | COG0568K           | TAAGGCTCATCGCGGTGGACGGGC    | 1                 | 103      | 103  | 1      | 100  | 8m_ATCC23344_chrl | 3510148 | 132134  | 132236  | 98   | 497  | 7.60E-18 - |        |        |
| BPSL0104  | hypothetical protein BPSL0104                      | 116034    | 116582 - |        | 182    | 53717744 | 3093185 -    | NULL               | CAGCCCCCGTAAAGGCGCGCGCAG    | 1                 | 103      | 103  | 1      | 100  | 8m_ATCC23344_chrl | 3510148 | 132946  | 133048  | 99   | 506  | 3.00E-18 - |        |        |
| BPSL0105  | hypothetical protein BPSL0105                      | 116974    | 117090 + |        | 38     | 53717745 | 3094117 -    | NULL               | GCACCCGCGCGCGCGCTGCGCTTC    | 1                 | 103      | 1    | 103    | 100  | 8m_ATCC23344_chrl | 3510148 | 133240  | 133342  | 99   | 506  | 3.00E-18 + |        |        |
| BPSL0106  | hypothetical protein BPSL0106                      | 117179    | 117748 - |        | 189    | 53717746 | 3094118 -    | COG3678UNTP        | ACGGTCAAGCGCGCTTCTCCAGG     | 1                 | 103      | 103  | 1      | 100  | 8m_ATCC23344_chrl | 3510148 | 134108  | 134210  | 97   | 488  | 1.90E-17 - |        |        |
| BPSL0107  | LysR family transcription regulatory protein       | 117851    | 118819 - |        | 322    | 53717747 | 3092142 -    | COG0583K           | CGCGCGCTGCATCGCGCAACGTCTC   | 1                 | 103      | 103  | 1      | 100  | 8m_ATCC23344_chrl | 3510148 | 135179  | 135281  | 100  | 515  | 1.20E-18 - |        |        |
| BPSL0108  | putative extracellular solute-binding lipoprotein  | 118962    | 120056 + |        | 364    | 53717748 | 3092143 -    | COG0687E           | AATCGATTTTCTTCTACTACGAT     | 1                 | 103      | 1    | 103    | 100  | 8m_ATCC23344_chrl | 3510148 | 135224  | 135326  | 100  | 515  | 1.20E-18 + |        |        |
| BPSL0114  | hypothetical protein BPSL0114                      | 127678    | 128082 + |        | 134    | 53717755 | 3091909 -    | COG2050Q           | TCCGAACGGGACAGATCCGTGCGA    | 1                 | 103      | 1    | 103    | 100  | 8m_ATCC23344_chrl | 3510148 | 144182  | 144284  | 100  | 515  | 1.20E-18 - |        |        |
| BPSL0116  | D-isomer specific 2-hydroxyacid dehydrogenase      | 129110    | 130126 - |        | 338    | 53717757 | 3092423 -    | COG0111HE          | AGGATCATTAACGGCCCTCAAAACG   | 1                 | 103      | 103  | 1      | 100  | 8m_ATCC23344_chrl | 3510148 | 146728  | 146830  | 99   | 506  | 3.00E-18 - |        |        |
| BPSL0118  | DNA topoisomerase III                              | 131843    | 134452 - |        | 869    | 53717759 | 3092351 -    | COG0550L           | CTTTTGTCTCAGCGCGCGCCGAT     | 1                 | 103      | 103  | 1      | 100  | 8m_ATCC23344_chrl | 3510148 | 151064  | 151166  | 100  | 515  | 1.20E-18 - | </     |        |

|          |                                                     |        |           |     |          |              |            |                            |   |     |     |     |                       |         |         |         |     |     |            |
|----------|-----------------------------------------------------|--------|-----------|-----|----------|--------------|------------|----------------------------|---|-----|-----|-----|-----------------------|---------|---------|---------|-----|-----|------------|
| BPSL0201 | sensor kinase protein                               | 208670 | 209950 +  | 426 | 53717843 | 3092250 -    | COG0642T   | CGTGCCTCGCCGACGAGATGCCCI   | 1 | 103 | 1   | 103 | 100 Bm_ATCC23344_chr1 | 3510148 | 3359810 | 3359912 | 100 | 515 | 1.20E-18 + |
| BPSL0204 | ATP-dependent protease peptidase subunit            | 212283 | 212819 -  | 178 | 53717846 | 3091995 hslV | COG5405O   | AATGCCGCGCGAGCGCGCGGCCA    | 1 | 103 | 103 | 1   | 100 Bm_ATCC23344_chr1 | 3510148 | 3364066 | 3364168 | 99  | 506 | 3.00E-18 - |
| BPSL0205 | dkxA/trax C4-type zinc finger family protein        | 213074 | 213490 -  | 138 | 53717847 | 3093397 -    | COG1734T   | CCCCGCACAGCGGAATGGCAACAA   | 1 | 103 | 103 | 1   | 100 Bm_ATCC23344_chr1 | 3510148 | 3364737 | 3364839 | 99  | 506 | 3.00E-18 - |
| BPSL0206 | hypothetical protein BPSL0206                       | 214040 | 215152 -  | 370 | 53717848 | 3091841 -    | COG0523R   | GCGCGCGCGCTTCGCGCCAGACGG   | 1 | 103 | 103 | 1   | 100 Bm_ATCC23344_chr1 | 3510148 | 3366402 | 3366504 | 100 | 515 | 1.20E-18 - |
| BPSL0207 | hypothetical protein BPSL0207                       | 215294 | 216571 -  | 425 | 53717849 | 3091842 -    | COG1092R   | CCCCGCGCGCGCGCGCGCGCGCG    | 1 | 91  | 91  | 1   | 100 Bm_ATCC23344_chr1 | 3510148 | 3367821 | 3367911 | 97  | 437 | 3.90E-15 - |
| BPSL0210 | lipid A biosynthesis lauroyl acyltransferase        | 219301 | 220185 -  | 294 | 53717853 | 3093529 -    | COG1560M   | CTTTCTCGAATTCGTACAGAGCGTC  | 1 | 103 | 103 | 1   | 100 Bm_ATCC23344_chr1 | 3510148 | 3371442 | 3371544 | 100 | 515 | 1.20E-18 - |
| BPSL0212 | S-adenosylmethionine synthetase                     | 220451 | 221638 +  | 395 | 53717854 | 3091760 metK | COG0192H   | AGCACCCAGCTGGCGCAGGAATCCG  | 1 | 103 | 1   | 103 | 100 Bm_ATCC23344_chr1 | 3510148 | 3371610 | 3371712 | 100 | 515 | 1.20E-18 - |
| BPSL0213 | hypothetical protein BPSL0213                       | 222402 | 223295 +  | 297 | 53717856 | 3094753 -    | COG5285Q   | GGCGCTTCTGTGACGAGTTCGTCG   | 1 | 103 | 1   | 103 | 100 Bm_ATCC23344_chr1 | 3510148 | 3373577 | 3373679 | 98  | 497 | 7.60E-18 + |
| BPSL0214 | hypothetical protein BPSL0214                       | 223564 | 223818 +  | 84  | 53717857 | 3094754 -    | NULL       | TGCGCTTCGGCGCGAGTCGCGACG   | 1 | 103 | 1   | 103 | 100 Bm_ATCC23344_chr1 | 3510148 | 3374746 | 3374848 | 98  | 497 | 7.60E-18 - |
| BPSL0215 | aldo/keto reductase family protein                  | 223950 | 224993 +  | 347 | 53717858 | 3093767 -    | COG0667C   | GGCGTTGCTGCACGATTCGCGACG   | 1 | 103 | 1   | 103 | 100 Bm_ATCC23344_chr1 | 3510148 | 3375132 | 3375234 | 100 | 515 | 1.20E-18 + |
| BPSL0216 | hypothetical protein BPSL0216                       | 225080 | 225265 -  | 61  | 53717859 | 3093768 -    | NULL       | GCGAAGCTTCGGATAACCAAAAAA   | 1 | 103 | 103 | 1   | 100 Bm_ATCC23344_chr1 | 3510148 | 3376501 | 3376603 | 99  | 506 | 3.00E-18 - |
| BPSL0217 | hypothetical protein BPSL0217                       | 225533 | 226396 -  | 287 | 53717860 | 3092144 -    | NULL       | TCTCCGTTCCGCCGCTGATCGAACCG | 1 | 103 | 103 | 1   | 100 Bm_ATCC23344_chr1 | 3510148 | 3377632 | 3377734 | 100 | 515 | 1.20E-18 - |
| BPSL0218 | putative transporter protein                        | 226751 | 228040 -  | 429 | 53717861 | 3092145 -    | NULL       | CATTCGGAATTCGCGCCAAAAGCG   | 1 | 103 | 103 | 1   | 100 Bm_ATCC23344_chr1 | 3510148 | 3379258 | 3379360 | 100 | 515 | 1.20E-18 - |
| BPSL0219 | hypothetical protein BPSL0219                       | 228394 | 228606 +  | 70  | 53717862 | 3092801 -    | NULL       | ATGAACAATGGAAATCGCTGCGCTT  | 1 | 103 | 1   | 103 | 100 Bm_ATCC23344_chr1 | 3510148 | 3379514 | 3379616 | 100 | 515 | 1.20E-18 - |
| BPSL0224 | putative GMC oxidoreductase                         | 233741 | 235384 +  | 547 | 53717866 | 3092388 -    | COG2303E   | TTTTGCGTTCTCAAAATCGCGAAC   | 1 | 103 | 1   | 103 | 100 Bm_ATCC23344_chr1 | 3510148 | 3384839 | 3384941 | 100 | 515 | 1.20E-18 + |
| BPSL0230 | flagellar M-ring protein                            | 240547 | 242343 -  | 598 | 53717872 | 3094419 flfF | COG1766NU  | CGCCCGATCGGCTTGACCGCGCTC   | 1 | 103 | 103 | 1   | 100 Bm_ATCC23344_chr1 | 3510148 | 3393530 | 3393632 | 100 | 515 | 1.20E-18 - |
| BPSL0231 | flagellar hook-basal body complex protein           | 242591 | 242932 +  | 113 | 53717873 | 3092006 flfE | COG1677NU  | GGCTGTGATCTTTTTCGAAATCCG   | 1 | 103 | 1   | 103 | 100 Bm_ATCC23344_chr1 | 3510148 | 3393680 | 3393783 | 99  | 505 | 3.30E-18 + |
| BPSL0232 | flagellar protein                                   | 243065 | 243499 +  | 144 | 53717874 | 3094559 flfS | COG1516NUO | AAGCTTTCGGCGTCTCTTACCGATA  | 1 | 103 | 1   | 103 | 100 Bm_ATCC23344_chr1 | 3510148 | 3394155 | 3394257 | 100 | 515 | 1.20E-18 - |
| BPSL0234 | hypothetical protein BPSL0234                       | 243932 | 245443 +  | 503 | 53717876 | 3093455 -    | NULL       | CGCGCGCGCGCTCTCGGCGCGCC    | 1 | 103 | 1   | 103 | 100 Bm_ATCC23344_chr1 | 3510148 | 3395022 | 3395124 | 100 | 515 | 1.20E-18 + |
| BPSL0236 | hypothetical protein BPSL0236                       | 245950 | 246696 +  | 248 | 53717878 | 3094778 -    | COG3295S   | CCCCGCTCGCGCAGCAATGAAGTCC  | 1 | 103 | 1   | 103 | 100 Bm_ATCC23344_chr1 | 3510148 | 3397018 | 3397120 | 100 | 515 | 1.20E-18 + |
| BPSL0237 | hypothetical protein BPSL0237                       | 246793 | 247818 -  | 341 | 53717879 | 3094779 -    | COG1975O   | TGCGCGCGCGCGCGCGCTCGACG    | 1 | 103 | 103 | 1   | 100 Bm_ATCC23344_chr1 | 3510148 | 3398978 | 3399080 | 99  | 506 | 3.00E-18 - |
| BPSL0238 | putative amino-acid transporter transmembrane prot  | 248017 | 249420 -  | 467 | 53717880 | 3092628 -    | COG0531E   | TGCGCATGCTCTCGCGCGCGGCGAT  | 1 | 103 | 103 | 1   | 100 Bm_ATCC23344_chr1 | 3510148 | 3400580 | 3400682 | 100 | 515 | 1.20E-18 - |
| BPSL0241 | ferredoxin--NADP reductase                          | 251607 | 252377 -  | 256 | 53717882 | 3092154 fpr  | COG1018C   | GGCGCGTGTCCGACGCGCTCGCG    | 1 | 103 | 103 | 1   | 100 Bm_ATCC23344_chr1 | 3510148 | 3404995 | 3405097 | 100 | 515 | 1.20E-18 - |
| BPSL0242 | LysE type translocator                              | 252590 | 253243 -  | 217 | 53717883 | 3093993 -    | COG1280E   | GCACGCGCGCGCGCGCGCGCGCTAC  | 1 | 68  | 68  | 1   | 100 Bm_ATCC23344_chr1 | 3510148 | 3405861 | 3405928 | 100 | 340 | 9.30E-11 - |
| BPSL0244 | hypothetical protein BPSL0244                       | 254128 | 254691 -  | 187 | 53717885 | 3093816 -    | NULL       | TGGAANAATCGCGCGTTCGGCGAC   | 1 | 103 | 103 | 1   | 100 Bm_ATCC23344_chr1 | 3510148 | 3407309 | 3407411 | 100 | 515 | 1.20E-18 - |
| BPSL0245 | putative ATPase                                     | 255025 | 256032 +  | 335 | 53717886 | 3092515 -    | COG0466O   | TGCGGTGCAGCATCGCGCGCATGT   | 1 | 103 | 1   | 103 | 100 Bm_ATCC23344_chr1 | 3510148 | 3407545 | 3407647 | 100 | 515 | 1.20E-18 + |
| BPSL0246 | putative FAD dependent oxidoreductase               | 256104 | 257225 +  | 373 | 53717887 | 3092516 -    | COG0579R   | CGGCGCGCGCGCGCGCTCGCGCTCG  | 1 | 74  | 1   | 74  | 100 Bm_ATCC23344_chr1 | 3510148 | 3408653 | 3408726 | 100 | 370 | 4.10E-12 + |
| BPSL0247 | putative iron-sulfur protein                        | 257360 | 257674 +  | 104 | 53717888 | 3093330 -    | NULL       | TCTTCGGAATTACTTCGACACATC   | 1 | 103 | 1   | 103 | 100 Bm_ATCC23344_chr1 | 3510148 | 3409880 | 3409982 | 100 | 515 | 1.20E-18 + |
| BPSL0248 | putative transporter protein                        | 257907 | 259199 +  | 430 | 53717889 | 3093331 -    | NULL       | CGCCCCGCGCGCGCTTCGCTTTTT   | 1 | 103 | 1   | 103 | 100 Bm_ATCC23344_chr1 | 3510148 | 3410427 | 3410528 | 99  | 500 | 5.50E-18 + |
| BPSL0249 | putative periplasmic dipeptide transport protein    | 259630 | 261258 +  | 542 | 53717890 | 3091878 dppA | COG0747E   | ACGGATGTGTTTTCTCTCAGCTTGT  | 1 | 103 | 1   | 103 | 100 Bm_ATCC23344_chr1 | 3510148 | 3412125 | 3412227 | 100 | 515 | 1.20E-18 - |
| BPSL0250 | putative dipeptide transport system permease protei | 261370 | 262380 +  | 336 | 53717891 | 3091879 dppB | COG0601EP  | CGCGGTATAGCGCGATCGACGATAT  | 1 | 103 | 1   | 103 | 100 Bm_ATCC23344_chr1 | 3510148 | 3413865 | 3413967 | 100 | 515 | 1.20E-18 + |
| BPSL0256 | hypothetical protein BPSL0256                       | 267975 | 268727 -  | 250 | 53717897 | 3092328 -    | NULL       | GAGCCGCGAAGGCGCAATCGGCGCG  | 1 | 103 | 103 | 1   | 100 Bm_ATCC23344_chr1 | 3510148 | 3421183 | 3421285 | 100 | 515 | 1.20E-18 - |
| BPSL0257 | hypothetical protein BPSL0257                       | 269350 | 270114 -  | 254 | 53717898 | 3092329 -    | COG1540R   | TTCCGGGAAGATCGCGACGCGCGCG  | 1 | 61  | 61  | 1   | 100 Bm_ATCC23344_chr1 | 3510148 | 3422567 | 3422627 | 100 | 305 | 3.60E-09 - |
| BPSL0259 | hypothetical protein BPSL0259                       | 271249 | 271905 -  | 178 | 53717900 | 3093401 -    | NULL       | CGTCCGCGCGGACGCGCGCGGAGAT  | 1 | 103 | 103 | 1   | 100 Bm_ATCC23344_chr1 | 3510148 | 3424356 | 3424458 | 99  | 506 | 3.00E-18 - |
| BPSL0260 | hypothetical protein BPSL0260                       | 272055 | 272567 +  | 210 | 53717901 | 3092063 -    | COG5631K   | AAATGTCTGATAACTTCTCGCCAAAA | 1 | 103 | 1   | 103 | 100 Bm_ATCC23344_chr1 | 3510148 | 3424408 | 3424510 | 100 | 515 | 1.20E-18 + |
| BPSL0263 | hypothetical protein BPSL0263                       | 275534 | 2776493 + | 319 | 53717904 | 3093790 -    | COG0702MG  | CGCTGCCGCGCAGCAGCACTCGCG   | 1 | 103 | 1   | 103 | 100 Bm_ATCC23344_chr1 | 3510148 | 3427847 | 3427949 | 98  | 497 | 7.60E-18 - |
| BPSL0264 | hypothetical protein BPSL0264                       | 276548 | 277204 -  | 218 | 53717905 | 3091442 -    | COG0625O   | GCAGGCGGCGCGCAGCGCGCGCCI   | 1 | 57  | 1   | 57  | 100 Bm_ATCC23344_chr1 | 3510148 | 3428907 | 3428963 | 100 | 285 | 2.80E-08 + |
| BPSL0267 | putative flagella synthesis protein                 | 279820 | 280260 -  | 146 | 53717908 | 3094413 -    | COG3418NUO | ACCGGCTTCGCGCGCGAAGACGG    | 1 | 82  | 82  | 1   | 100 Bm_ATCC23344_chr1 | 3510148 | 3432635 | 3432716 | 100 | 410 | 6.40E-14 - |
| BPSL0268 | putative negative regulator of flagellin synthesis  | 280340 | 280684 -  | 114 | 53717909 | 3094414 -    | NULL       | TGCAAACTTTTGTGTATTACAGGGGG | 1 | 103 | 103 | 1   | 100 Bm_ATCC23344_chr1 | 3510148 | 3433059 | 3433161 | 100 | 515 | 1.20E-18 - |
| BPSL0269 | flagellar basal body P-ring biosynthesis protein    | 280788 | 281711 -  | 307 | 53717910 | 3094150 -    | COG1261NO  | TCGTCCGCGCGCTCATATGATTCGCG | 1 | 103 | 103 | 1   | 100 Bm_ATCC23344_chr1 | 3510148 | 3434082 | 3434184 | 100 | 515 | 1.20E-18 - |
| BPSL0271 | flagellar basal body rod protein                    | 283152 | 283577 +  | 141 | 53717912 | 3094664 flgC | COG1558N   | CGCCGCGCTTCGCGCGTTTCCCGCG  | 1 | 86  | 1   | 86  | 100 Bm_ATCC23344_chr1 | 3510148 | 3435430 | 3435515 | 100 | 430 | 8.00E-15 + |
| BPSL0279 | hypothetical protein BPSL0279                       | 290455 | 291213 +  | 252 | 53717920 | 3094383 -    | NULL       | CGCGCTAAAGCTGTAGAGACGACG   | 1 | 103 | 1   | 103 | 100 Bm_ATCC23344_chr1 | 3510148 | 3442696 | 3442798 | 99  | 506 | 3.30E-18 + |
| BPSL0280 | flagellar hook-associated protein                   | 291419 | 293422 +  | 66  | 53717921 | 3093210 -    | COG1256N   | TTTTGCGGTGCGGCTCCTCAATTTT  | 1 | 103 | 1   | 103 | 100 Bm_ATCC23344_chr1 | 3510148 | 3443660 | 3443762 | 100 | 515 | 1.20E-18 - |
| BPSL0282 | putative permease                                   | 295038 | 296345 +  | 435 | 53717923 | 3093674 -    | COG2233F   | CGCCTTGTACGCGCGATTCGCGCTC  | 1 | 103 | 1   | 103 | 100 Bm_ATCC23344_chr1 | 3510148 | 3447279 | 3447381 | 100 | 515 | 1.20E-18 + |
| BPSL0283 | LysR family regulatory protein                      | 296548 | 297429 -  | 293 | 53717924 | 3093675 -    | COG0583K   | GGCAGTCTCGTGAATTCACAGAGC   | 1 | 100 | 100 | 1   | 100 Bm_ATCC23344_chr1 | 3510148 | 3449755 | 3449854 | 100 | 500 | 5.50E-18 - |
| BPSL0284 | putative chromate transport protein                 | 297527 | 298126 +  | 199 | 53717925 | 3093313 -    | COG2059P   | GCTTGATGATCTAGCTACAAGGCG   | 1 | 100 | 1   | 100 | 100 Bm_ATCC23344_chr1 | 3510148 | 3449758 | 3449857 | 100 | 500 | 5.50E-18 + |
| BPSL0286 | hypothetical protein BPSL0286                       | 298984 | 299322 -  | 112 | 53717927 | 3094537 -    | NULL       | TGTTTGCACTTGATCGAATACGTGA  | 1 | 103 | 103 | 1   | 100 Bm_ATCC23344_chr1 | 3510148 | 3451667 | 3451769 | 100 | 515 | 1.20E-18 - |
| BPSL0287 | hypothetical protein BPSL0287                       | 299436 | 299780 +  | 114 | 53717928 | 3094538 -    | COG2824P   | GGCGTGAATCGTGAAGACGAGGCG   | 1 | 103 | 1   | 103 | 100 Bm_ATCC23344_chr1 | 3510148 | 3451683 | 3451785 | 100 | 515 | 1.20E-18 - |
| BPSL0289 | putative outer membrane porin protein               | 301079 | 302212 +  | 377 | 53717930 | 3094401 -    | COG3203M   | AGCTTTCACTGTCATATGATTCGTG  | 1 | 103 | 1   | 103 | 100 Bm_ATCC23344_chr1 | 3510148 | 3453299 | 3453401 | 100 | 515 | 1.20E-18 + |
| BPSL0291 | hypothetical protein BPSL0291                       | 303251 | 303814 -  | 187 | 53717932 | 3094246 -    | NULL       | GTITTCGAAGCGCTGGTGAGAGCG   | 1 | 103 | 103 | 1   | 100 Bm_ATCC23344_chr1 | 3510148 | 3456132 | 3456234 | 100 | 515 | 1.20E-18 - |
| BPSL0293 | putative glucosyltransferase                        | 305245 | 306513 -  | 422 | 53717934 | 3094737 -    | COG1215M   | CGTGCCTTAAGCGCGGACGCCATCA  | 1 | 103 | 102 | 1   | 100 Bm_ATCC23344_chr1 | 3510148 | 3460072 | 3460173 | 100 | 510 | 2.00E-18 - |
| BPSL0294 | hypothetical protein BPSL0294                       | 306895 | 308424 -  | 509 | 53717935 | 3094738 -    | COG3659M   | GGTGGTTCCTGAAGCGCTCGCGCG   | 1 | 103 | 103 | 1   | 100 Bm_ATCC23344_chr1 | 3510148 | 3461982 | 3462084 | 98  | 497 | 7.60E-18 - |
| BPSL0297 | glutathione reductase                               | 312715 | 314076 +  | 453 | 53717938 | 3092896 gor  | COG1249C   | GGCTGATGATTGCGCTGCATGACAC  | 1 | 103 | 1   | 103 | 100 Bm_ATCC23344_chr1 | 3510148 | 3467766 | 3467868 | 100 | 515 | 1.20E-18 + |
| BPSL0298 | argininosuccinate synthase                          | 314669 | 316009 +  | 446 | 53717939 | 3091609 argG | COG0137E   | CGGCCGGGCGCGCGCGGAGACTT    | 1 | 103 | 1   | 103 | 100 Bm_ATCC23344_chr1 | 3510148 | 3469720 | 3469822 | 100 | 515 | 1.20E-18 + |

|          |                                                       |        |          |     |          |                |                    |                            |   |     |     |     |                       |         |         |         |     |     |            |
|----------|-------------------------------------------------------|--------|----------|-----|----------|----------------|--------------------|----------------------------|---|-----|-----|-----|-----------------------|---------|---------|---------|-----|-----|------------|
| BPSL0372 | putative carbonic anhydrase                           | 401445 | 402215 - | 256 | 53718012 | 3092418 -      | NULL               | GCCGCGCCGCCGCCGCGCTGCAAC   | 1 | 60  | 1   | 60  | 100 Bm_ATCC23344_chr1 | 3510148 | 107590  | 107649  | 98  | 291 | 1.50E-08 + |
| BPSL0373 | bifunctional isocitrate dehydrogenase kinase/phosph   | 402273 | 404084 - | 603 | 53718013 | 3092419 aceK   | NULL               | GGCCGCGCCGCCGCCGCTGCCGCCA  | 1 | 103 | 1   | 103 | 100 Bm_ATCC23344_chr1 | 3510148 | 105678  | 105780  | 100 | 515 | 1.20E-18 - |
| BPSL0374 | metallo-beta-lactamase superfamily protein            | 404374 | 405453 + | 359 | 53718014 | 3093229 -      | COG0491R           | CGAAGCGCGCCGCCGCCGCTTGG    | 1 | 103 | 103 | 1   | 100 Bm_ATCC23344_chr1 | 3510148 | 105486  | 105588  | 100 | 515 | 1.20E-18 - |
| BPSL0375 | ABC transport system ATP-binding protein              | 405732 | 407378 - | 548 | 53718015 | 3093230 -      | COG0488R           | CCTTCCCCCGAATGTTTCCGCGCT   | 1 | 103 | 1   | 103 | 100 Bm_ATCC23344_chr1 | 3510148 | 102368  | 102470  | 100 | 515 | 1.20E-18 + |
| BPSL0376 | extracellular solute-binding protein                  | 407612 | 409198 - | 128 | 53718016 | 3092891 -      | COG0747E           | TAACGGCGAGCGGCCAATTGACGGT  | 1 | 103 | 1   | 103 | 100 Bm_ATCC23344_chr1 | 3510148 | 100548  | 100650  | 100 | 515 | 1.20E-18 - |
| BPSL0378 | MarR family regulatory protein                        | 410175 | 410642 - | 155 | 53718018 | 3093026 -      | COG1846K           | CGCATCGATTGGCCCAATGGCCGG   | 1 | 103 | 1   | 103 | 100 Bm_ATCC23344_chr1 | 3510148 | 99570   | 99672   | 100 | 515 | 1.20E-18 + |
| BPSL0379 | short chain dehydrogenase                             | 410881 | 411594 + | 237 | 53718019 | 3093027 -      | COG1028IQR         | CGCTGCGCGCGCGGCTTGACGCGG   | 1 | 103 | 103 | 1   | 100 Bm_ATCC23344_chr1 | 3510148 | 99428   | 99531   | 97  | 487 | 2.10E-17 - |
| BPSL0381 | thiol:disulfide interchange protein                   | 412535 | 413173 - | 212 | 53718021 | 3093149 dsbA   | NULL               | GCTGGCGCGCTCATCTCGACTTGTA  | 1 | 54  | 1   | 54  | 100 Bm_ATCC23344_chr1 | 3510148 | 97079   | 97132   | 98  | 261 | 3.40E-07 + |
| BPSL0382 | hypothetical protein BPSL0382                         | 413225 | 414073 - | 282 | 53718022 | 3092048 -      | COG3087D           | ATCCGAGACCTCTGGCGCAAGCGCC  | 1 | 81  | 1   | 81  | 100 Bm_ATCC23344_chr1 | 3510148 | 96152   | 96232   | 100 | 405 | 1.10E-13 + |
| BPSL0383 | arginyl-tRNA synthetase                               | 414152 | 415936 - | 594 | 53718023 | 3093875 argS   | COG0018J           | ATTAGACCTTGTTAAATTCAGCGA   | 1 | 103 | 1   | 103 | 100 Bm_ATCC23344_chr1 | 3510148 | 94267   | 94369   | 100 | 515 | 1.20E-18 + |
| BPSL0384 | hypothetical protein BPSL0384                         | 416139 | 416462 + | 107 | 53718024 | 3092817 -      | NULL               | GCCGCTCAGGTGCTAAGCGCCCCC   | 1 | 103 | 103 | 1   | 100 Bm_ATCC23344_chr1 | 3510148 | 94162   | 94264   | 99  | 506 | 3.00E-18 - |
| BPSL0385 | putative 5-methyltetrahydrofolate--homocysteine me    | 416706 | 419408 - | 900 | 53718025 | 3091951 methH1 | COG1410E           | CGCGCGCGCGCTCCCCACTCCAA    | 1 | 63  | 1   | 63  | 100 Bm_ATCC23344_chr1 | 3510148 | 89243   | 89305   | 100 | 315 | 1.30E-09 + |
| BPSL0386 | putative 5-methyltetrahydrofolate--homocysteine me    | 419469 | 420548 - | 359 | 53718026 | 3093220 methH2 | COG0646E           | CCCCGCCGCCGCCGCCGGGGCTTT   | 1 | 103 | 1   | 103 | 100 Bm_ATCC23344_chr1 | 3510148 | 88064   | 88165   | 99  | 500 | 5.50E-18 + |
| BPSL0387 | hypothetical protein BPSL0387                         | 420737 | 420994 - | 85  | 53718027 | 3092818 -      | NULL               | AAAAACGACGGCGTGACGAGCCCA   | 1 | 103 | 1   | 103 | 100 Bm_ATCC23344_chr1 | 3510148 | 87618   | 87720   | 100 | 515 | 1.20E-18 - |
| BPSL0389 | IdR family regulatory protein                         | 422575 | 423438 - | 287 | 53718029 | 3093933 -      | COG1414K           | AGCCGTGTGTAGTGACGATGGAAGG  | 1 | 103 | 1   | 103 | 100 Bm_ATCC23344_chr1 | 3510148 | 85174   | 85276   | 99  | 506 | 3.00E-18 + |
| BPSL0390 | fumarylacetoacetate (FAA) hydrolase family protein    | 423548 | 424540 + | 330 | 53718030 | 3092780 -      | COG0179Q           | GGAAGAATGGGAGGGGGCGGCT     | 1 | 103 | 103 | 1   | 100 Bm_ATCC23344_chr1 | 3510148 | 85162   | 85264   | 98  | 497 | 7.60E-18 - |
| BPSL0391 | enoyl-CoA hydratase                                   | 424759 | 425586 + | 275 | 53718031 | 3092781 -      | COG1024I           | CGCCGGGTTTGGCGGATGACCC     | 1 | 103 | 103 | 1   | 100 Bm_ATCC23344_chr1 | 3510148 | 83973   | 84075   | 98  | 497 | 7.60E-18 - |
| BPSL0392 | hypothetical protein BPSL0392                         | 425676 | 426467 + | 263 | 53718032 | 3091454 -      | NULL               | GCGCGCGCGCGCTATGATCGATG    | 1 | 92  | 92  | 1   | 100 Bm_ATCC23344_chr1 | 3510148 | 83056   | 83147   | 100 | 460 | 3.50E-16 - |
| BPSL0394 | hypothetical protein BPSL0394                         | 428396 | 429271 + | 291 | 53718034 | 3093845 -      | NULL               | GGCTAAAATTATCGGTTCGCTGCG   | 1 | 103 | 103 | 1   | 100 Bm_ATCC23344_chr1 | 3510148 | 80402   | 80504   | 99  | 506 | 3.00E-18 - |
| BPSL0395 | putative cytidyltransferase                           | 429412 | 429897 + | 161 | 53718035 | 3093846 -      | COG2870M           | CGCGGGGCTTTTCTTTTCGCGATT   | 1 | 103 | 103 | 1   | 100 Bm_ATCC23344_chr1 | 3510148 | 79386   | 79488   | 99  | 506 | 3.00E-18 - |
| BPSL0396 | hypothetical protein BPSL0396                         | 429943 | 430365 - | 140 | 53718036 | 3092275 -      | NULL               | CACGCGACGGCGGCTCGCGCGCCC   | 1 | 103 | 1   | 103 | 100 Bm_ATCC23344_chr1 | 3510148 | 78323   | 78425   | 100 | 515 | 1.20E-18 + |
| BPSL0398 | biotin--protein ligase                                | 431251 | 432210 - | 319 | 53718038 | 3093253 -      | COG0340H           | GACCGAGCCGCGCAAGCGCGCGAT   | 1 | 103 | 1   | 103 | 100 Bm_ATCC23344_chr1 | 3510148 | 76478   | 76580   | 100 | 515 | 1.20E-18 + |
| BPSL0400 | putative 2',3'-cyclic-nucleotide 2'-phosphodiesterase | 433552 | 435612 - | 686 | 53718040 | 3091766 cpdB   | COG0737F           | GTITTCCTTTCGATACCTTCACGGCT | 1 | 103 | 1   | 103 | 100 Bm_ATCC23344_chr1 | 3510148 | 73071   | 73173   | 100 | 515 | 1.20E-18 - |
| BPSL0401 | hypothetical protein BPSL0401                         | 435878 | 437002 + | 374 | 53718041 | 3094331 -      | NULL               | CGCGCGCGCGCGCGCGCGCGCGCT   | 1 | 103 | 103 | 1   | 100 Bm_ATCC23344_chr1 | 3510148 | 72899   | 73005   | 96  | 475 | 7.40E-17 - |
| BPSL0406 | putative ferredoxin                                   | 440800 | 441129 + | 109 | 53718046 | 3092794 -      | COG3411C           | CACGACTAGCTCGCGATGCCGGCI   | 1 | 103 | 103 | 1   | 100 Bm_ATCC23344_chr1 | 3510148 | 67990   | 68091   | 99  | 500 | 5.50E-18 - |
| BPSL0408 | penicillin-binding protein 6                          | 442663 | 443874 + | 403 | 53718048 | 3091693 -      | COG1686M           | GGCTGTGTCCTCTCGCGGCTCACG   | 1 | 103 | 103 | 1   | 100 Bm_ATCC23344_chr1 | 3510148 | 66105   | 66207   | 100 | 515 | 1.20E-18 - |
| BPSL0409 | putative D-amino acid aminotransferase                | 443964 | 444911 + | 315 | 53718049 | 3091605 -      | COG015EH           | GCTGTCGGCTCGCGTGAAGCGCGG   | 1 | 92  | 92  | 1   | 100 Bm_ATCC23344_chr1 | 3510148 | 64804   | 64895   | 100 | 460 | 3.50E-16 - |
| BPSL0411 | LysR family regulatory protein                        | 445227 | 446192 - | 321 | 53718051 | 3092902 -      | COG0583K           | GACAGCTCCGCGCAATCTGCTTCA   | 1 | 103 | 1   | 103 | 100 Bm_ATCC23344_chr1 | 3510148 | 62478   | 62580   | 99  | 506 | 3.00E-18 + |
| BPSL0412 | hypothetical protein BPSL0412                         | 446293 | 446619 + | 108 | 53718052 | 3092903 -      | NULL               | CGGTAGTTTTTCTCACAAGCACGT   | 1 | 103 | 103 | 1   | 100 Bm_ATCC23344_chr1 | 3510148 | 62475   | 62577   | 99  | 506 | 3.00E-18 - |
| BPSL0416 | family T3 non-peptidase homologue                     | 449010 | 450893 - | 627 | 53718055 | 3091829 -      | NULL               | GACACGGCGCAATACCCCGCGCT    | 1 | 103 | 1   | 103 | 100 Bm_ATCC23344_chr1 | 3510148 | 3344236 | 3344338 | 100 | 515 | 1.20E-18 + |
| BPSL0418 | LysR family regulatory protein                        | 452345 | 453247 - | 300 | 53718057 | 3093256 -      | COG0583K           | CCACGATTTCGATTGATGATGATT   | 1 | 103 | 1   | 103 | 100 Bm_ATCC23344_chr1 | 3510148 | 3342040 | 3342142 | 99  | 506 | 3.00E-18 + |
| BPSL0419 | putative trifunctional protein                        | 453402 | 455528 - | 708 | 53718058 | 3093098 -      | COG1024L, COG1250I | AGAATGTGGGAATTGCAATCAATC   | 1 | 103 | 103 | 1   | 100 Bm_ATCC23344_chr1 | 3510148 | 3341983 | 3342085 | 100 | 515 | 1.20E-18 - |
| BPSL0420 | hypothetical protein BPSL0420                         | 455583 | 456791 + | 402 | 53718059 | 3093099 -      | COG1960I           | CGCCGCGCGCGCGCGCGCGCGGCT   | 1 | 57  | 57  | 1   | 100 Bm_ATCC23344_chr1 | 3510148 | 3339802 | 3339858 | 100 | 285 | 2.80E-08 - |
| BPSL0425 | C4-dicarboxylate transport protein                    | 462003 | 463289 + | 428 | 53718064 | 3094703 dctA   | COG1301C           | GGCACGGCGCGCGCGCGCGCGGCT   | 1 | 103 | 103 | 1   | 100 Bm_ATCC23344_chr1 | 3510148 | 3333536 | 3333638 | 100 | 515 | 1.20E-18 - |
| BPSL0428 | hypothetical protein BPSL0428                         | 466845 | 467381 - | 178 | 53718067 | 3093439 -      | COG0526OC          | GGTGCGACGCGCGCGATGACGGTA   | 1 | 103 | 1   | 103 | 100 Bm_ATCC23344_chr1 | 3510148 | 3328130 | 3328232 | 99  | 506 | 3.00E-18 + |
| BPSL0429 | hypothetical protein BPSL0429                         | 467674 | 468264 + | 196 | 53718068 | 3093440 -      | NULL               | TATGCGCGCTGCTGCTCCGCTTGC   | 1 | 103 | 103 | 1   | 100 Bm_ATCC23344_chr1 | 3510148 | 3327935 | 3328037 | 99  | 506 | 3.00E-18 - |
| BPSL0430 | putative thioesterase                                 | 468950 | 469729 - | 259 | 53718069 | 3092430 -      | COG3208Q           | GCCCTTTCGCGGGCATCGCCCGCG   | 1 | 103 | 1   | 103 | 100 Bm_ATCC23344_chr1 | 3510148 | 3325801 | 3325905 | 98  | 495 | 9.30E-18 + |
| BPSL0432 | putative magnesium chelatase subunit                  | 471119 | 472705 - | 528 | 53718071 | 3092499 -      | COG0606O           | GCAGCTCGCGCCACGCGGCCCAAG   | 1 | 103 | 1   | 103 | 100 Bm_ATCC23344_chr1 | 3510148 | 3322839 | 3322941 | 100 | 515 | 1.20E-18 + |
| BPSL0433 | hypothetical protein BPSL0433                         | 472843 | 473094 - | 83  | 53718072 | 3092500 -      | NULL               | AAAACGGCGCGCGCGCGCACCAAP   | 1 | 103 | 1   | 103 | 100 Bm_ATCC23344_chr1 | 3510148 | 3322450 | 3322552 | 100 | 515 | 1.20E-18 - |
| BPSL0434 | nitrogen regulatory protein P-II 1                    | 473463 | 473801 - | 112 | 53718073 | 3093665 glnB1  | COG0347E           | TTTGATACCCGGGCTGAGCGGACAT  | 1 | 103 | 103 | 1   | 100 Bm_ATCC23344_chr1 | 3510148 | 3322179 | 3322281 | 100 | 515 | 1.20E-18 - |
| BPSL0436 | glutamate--cysteine ligase                            | 475712 | 477040 + | 442 | 53718075 | 3093803 gshA   | NULL               | CGGGCGCGCGCGGATCAACCTTCG   | 1 | 103 | 103 | 1   | 100 Bm_ATCC23344_chr1 | 3510148 | 3318483 | 3318585 | 99  | 506 | 3.00E-18 - |
| BPSL0438 | sugar transport PTS system Ila component              | 478197 | 478670 + | 157 | 53718077 | 3094449 -      | COG2893G           | CGCGACCGGCTCGACCGCGCTGCT   | 1 | 103 | 103 | 1   | 100 Bm_ATCC23344_chr1 | 3510148 | 3315998 | 3316100 | 100 | 515 | 1.20E-18 - |
| BPSL0439 | phosphocarrier protein HPr                            | 478747 | 479016 + | 89  | 53718078 | 3094543 ptsH   | COG1925G           | GCCCGCGCACCGATTCTGTATCATCC | 1 | 79  | 79  | 1   | 100 Bm_ATCC23344_chr1 | 3510148 | 3315448 | 3315526 | 97  | 377 | 2.00E-12 - |
| BPSL0440 | putative phosphoenolpyruvate-protein phosphotrans     | 479212 | 480984 - | 590 | 53718079 | 3091621 -      | COG1080G           | CGCACGCAATCATGCGGCTATGCGI  | 1 | 103 | 103 | 1   | 100 Bm_ATCC23344_chr1 | 3510148 | 3314983 | 3315085 | 100 | 515 | 1.20E-18 - |
| BPSL0441 | molybdopterin biosynthesis protein MoeB               | 481272 | 482030 - | 252 | 53718080 | 3091622 -      | COG0476H           | GCGACGCCGTGACGCGGCAATCGC   | 1 | 103 | 1   | 103 | 100 Bm_ATCC23344_chr1 | 3510148 | 3312133 | 3312235 | 100 | 515 | 1.20E-18 - |
| BPSL0442 | C-terminal processing protease-3                      | 482135 | 483709 - | 524 | 53718081 | 3092719 -      | COG0793M           | CGATCCACAAGCGGTCCGACGAA    | 1 | 103 | 1   | 103 | 100 Bm_ATCC23344_chr1 | 3510148 | 3310454 | 3310556 | 100 | 515 | 1.20E-18 + |
| BPSL0443 | phosphoglyceromutase                                  | 483930 | 484679 - | 249 | 53718082 | 3093540 gpmA   | COG0588G           | GCAATCCGCGCAATATAAAATAACC  | 1 | 103 | 1   | 103 | 100 Bm_ATCC23344_chr1 | 3510148 | 3309484 | 3309586 | 100 | 515 | 1.20E-18 + |
| BPSL0444 | hypothetical protein BPSL0444                         | 484813 | 485220 + | 135 | 53718083 | 3092720 -      | COG0607P           | GCGCGGATGCGGACCCGGCTCCGG   | 1 | 103 | 103 | 1   | 100 Bm_ATCC23344_chr1 | 3510148 | 3309448 | 3309550 | 100 | 515 | 1.20E-18 - |
| BPSL0446 | export protein SecB                                   | 485609 | 486088 + | 159 | 53718085 | 3091642 secB   | COG1952U           | GGCGCGCGCGGCTCTTCCGGCGCG   | 1 | 103 | 103 | 1   | 100 Bm_ATCC23344_chr1 | 3510148 | 3308652 | 3308754 | 100 | 515 | 1.20E-18 - |
| BPSL0448 | Appr-1-p processing enzyme family protein             | 487265 | 487798 + | 177 | 53718087 | 3092510 -      | NULL               | TGCACGGCGCGCGCGCGCGGCTTG   | 1 | 103 | 103 | 1   | 100 Bm_ATCC23344_chr1 | 3510148 | 3306996 | 3307098 | 100 | 515 | 1.20E-18 - |
| BPSL0450 | hypothetical protein BPSL0450                         | 488744 | 489472 - | 242 | 53718089 | 3093817 -      | COG1040R           | CGCAAGTATATCGCTCGCTTCGCG   | 1 | 103 | 1   | 103 | 100 Bm_ATCC23344_chr1 | 3510148 | 3304691 | 3304793 | 99  | 506 | 3.00E-18 + |
| BPSL0451 | hypothetical protein BPSL0451                         | 489559 | 490560 + | 321 | 53718090 | 3093818 -      | COG0500QR          | ACGGCGGATTGCGCATCGCGCGGG   | 1 | 103 | 103 | 1   | 100 Bm_ATCC23344_chr1 | 3510148 | 3304666 | 3304768 | 100 | 515 | 1.20E-18 - |
| BPSL0452 | hypothetical protein BPSL0452                         | 490758 | 491273 + | 171 | 53718091 | 3092265 -      | COG5488S           | CGCGCGCGCATGGCCGTTTGCTGTI  | 1 | 103 | 103 | 1   | 100 Bm_ATCC23344_chr1 | 3510148 | 3303503 | 3303605 | 100 | 515 | 1.20E-18 - |
| BPSL0455 | hypothetical protein BPSL0455                         | 494620 | 494760 + | 46  | 53718094 | 3092603 -      | NULL               | TGATTTGACGGGCTTCGCGCCCGCT  | 1 | 71  | 71  | 1   | 100 Bm_ATCC23344_chr1 | 3510148 | 3299641 | 3299711 | 98  | 346 | 5.00E-11 - |
| BPSL0458 | putative cytochrome c oxidase subunit III             | 495742 | 496599 + | 285 | 53718097 | 3093868 -      | COG1845C           | CGTTCGCGAGGCGCAAAACAAGCGA  |   |     |     |     |                       |         |         |         |     |     |            |

|          |                                                     |        |          |      |          |              |                    |                             |   |     |     |     |     |                   |         |         |         |     |     |            |
|----------|-----------------------------------------------------|--------|----------|------|----------|--------------|--------------------|-----------------------------|---|-----|-----|-----|-----|-------------------|---------|---------|---------|-----|-----|------------|
| BPSL0503 | hypothetical protein BPSL0503                       | 553330 | 553614 - | 94   | 53718143 | 3092140 -    | NULL               | GCCCTCTCAATAATGGGAGGACCGI   | 1 | 103 | 103 | 1   | 100 | 8m_ATCC23344_chr1 | 3510148 | 3286529 | 3286631 | 100 | 515 | 1.20E-18 - |
| BPSL0504 | RNA polymerase sigma factor                         | 554070 | 555005 - | 311  | 53718144 | 3094670 rpoH | COG0568K           | TCCTTCTAAGAGTTAGCACTCCAGT   | 1 | 103 | 1   | 103 | 100 | 8m_ATCC23344_chr1 | 3510148 | 3234700 | 3234802 | 100 | 515 | 1.20E-18 + |
| BPSL0505 | hypothetical protein BPSL0505                       | 555370 | 555939 + | 189  | 53718145 | 3092141 -    | NULL               | TCGCGATCGGAAAGACCTTTACCA    | 1 | 103 | 103 | 1   | 100 | 8m_ATCC23344_chr1 | 3510148 | 3234433 | 3234535 | 100 | 515 | 1.20E-18 - |
| BPSL0507 | 2-isopropylmalate synthase                          | 556694 | 558334 - | 546  | 53718147 | 3092728 -    | COG0119E           | TGCGCGCCGTCGTGCCATCGGGCA    | 1 | 103 | 1   | 103 | 100 | 8m_ATCC23344_chr1 | 3510148 | 3231371 | 3231473 | 100 | 515 | 1.20E-18 + |
| BPSL0508 | acetyltransferase (GNAT) family protein             | 558769 | 559617 - | 282  | 53718148 | 3092599 -    | NULL               | CACGCACAGACGAGCGTCCGCCGC    | 1 | 103 | 1   | 103 | 100 | 8m_ATCC23344_chr1 | 3510148 | 3230087 | 3230189 | 98  | 497 | 7.60E-18 + |
| BPSL0511 | putative nitrite reductase small subunit            | 564060 | 564455 - | 131  | 53718151 | 3094128 -    | COG2146PR          | TCCCGATGCGCGATGCGTGACCGCC   | 1 | 78  | 1   | 78  | 100 | 8m_ATCC23344_chr1 | 3510148 | 3225274 | 3225351 | 93  | 338 | 1.10E-10 + |
| BPSL0512 | putative nitrite reductase                          | 564531 | 566975 - | 814  | 53718152 | 3092067 -    | COG1251C           | TTTTAAATACGGCGCAATAAAAGAG   | 1 | 103 | 1   | 103 | 100 | 8m_ATCC23344_chr1 | 3510148 | 3222736 | 3222838 | 100 | 515 | 1.20E-18 + |
| BPSL0513 | putative maleylacetate isomerase                    | 567360 | 568004 + | 214  | 53718153 | 3092068 -    | COG0625O           | GGCGCGCGCGCTTTTCCGCTCGTC    | 1 | 103 | 103 | 1   | 100 | 8m_ATCC23344_chr1 | 3510148 | 3222449 | 3222551 | 99  | 506 | 3.00E-18 - |
| BPSL0514 | putative cell division protein                      | 568161 | 569480 - | 439  | 53718154 | 3092707 -    | COG0552U           | GCAAGCGCGCTGCCCGCGACGCGC    | 1 | 103 | 1   | 103 | 100 | 8m_ATCC23344_chr1 | 3510148 | 3220231 | 3220333 | 99  | 506 | 3.00E-18 + |
| BPSL0515 | hypothetical protein BPSL0515                       | 569732 | 570358 + | 208  | 53718155 | 3092708 -    | COG0742L           | ACGGCGCGCGCTTTGTGGTAACGTG   | 1 | 103 | 103 | 1   | 100 | 8m_ATCC23344_chr1 | 3510148 | 3220077 | 3220179 | 100 | 515 | 1.20E-18 - |
| BPSL0516 | phosphopantetheine adenylyltransferase              | 570469 | 570969 + | 166  | 53718156 | 3092046 coaD | COG0669H           | AAACGAGGCGCGCGTGCAGTCGCG    | 1 | 103 | 103 | 1   | 100 | 8m_ATCC23344_chr1 | 3510148 | 3219340 | 3219442 | 100 | 515 | 1.20E-18 - |
| BPSL0517 | ferredoxin                                          | 571032 | 571298 + | 88   | 53718157 | 3094859 fdx  | NULL               | GGCCCCGCGCGCGCGCGCGGCC      | 1 | 65  | 65  | 1   | 100 | 8m_ATCC23344_chr1 | 3510148 | 3218777 | 3218841 | 100 | 325 | 4.40E-10 - |
| BPSL0518 | histidinol-phosphate aminotransferase               | 571468 | 572538 - | 356  | 53718158 | 3094062 -    | COG0079E           | GCCCGCGCGGTGCCCGCCGCCGC     | 1 | 91  | 1   | 91  | 100 | 8m_ATCC23344_chr1 | 3510148 | 3217176 | 3217266 | 100 | 455 | 6.00E-16 + |
| BPSL0519 | peptidyl-tRNA hydrolase                             | 572627 | 573232 - | 201  | 53718159 | 3093142 pth  | NULL               | CGTTTTGCACGACGGTGCAGGAGAG   | 1 | 103 | 1   | 103 | 100 | 8m_ATCC23344_chr1 | 3510148 | 3216470 | 3216572 | 100 | 515 | 1.20E-18 + |
| BPSL0520 | S05 ribosomal protein L25                           | 573346 | 573972 - | 208  | 53718160 | 3094063 -    | COG1825J           | CTTTTTGCACATCGCGCGGGACCG    | 1 | 103 | 1   | 103 | 100 | 8m_ATCC23344_chr1 | 3510148 | 3215730 | 3215832 | 100 | 515 | 1.20E-18 + |
| BPSL0525 | hypothetical protein BPSL0525                       | 576793 | 578613 - | 606  | 53718164 | 3093198 -    | NULL               | CTTTTACGGGTCTCTATCTGGCTAAI  | 1 | 91  | 1   | 91  | 100 | 8m_ATCC23344_chr1 | 3510148 | 3211077 | 3211167 | 100 | 455 | 6.00E-16 + |
| BPSL0529 | hypothetical protein BPSL0529                       | 581696 | 582589 - | 297  | 53718168 | 3093406 -    | COG1660R           | GCCCGCTAAACCGCGCGCTTCGTCG   | 1 | 88  | 1   | 88  | 100 | 8m_ATCC23344_chr1 | 3510148 | 3207122 | 3207209 | 97  | 422 | 1.80E-14 + |
| BPSL0530 | HPr kinase/phosphorylase                            | 582675 | 583643 - | 322  | 53718169 | 3093647 -    | COG1493T           | CGTCCGCGCGCGCGCGCGGACGCG    | 1 | 103 | 1   | 103 | 100 | 8m_ATCC23344_chr1 | 3510148 | 3206053 | 3206155 | 100 | 515 | 1.20E-18 + |
| BPSL0531 | putative nitrogen regulatory IIA protein            | 583772 | 584227 - | 151  | 53718170 | 3092867 -    | COG1762GT          | CGCTTTCACAGGTCTCGTGCCTACA   | 1 | 103 | 1   | 103 | 100 | 8m_ATCC23344_chr1 | 3510148 | 3205469 | 3205571 | 100 | 515 | 1.20E-18 + |
| BPSL0532 | putative PTS system, IIA component                  | 584514 | 584873 - | 119  | 53718171 | 3092868 -    | COG1544J           | AAGCCCCGACGACCACTCTCTCTCG   | 1 | 103 | 1   | 103 | 100 | 8m_ATCC23344_chr1 | 3510148 | 3204823 | 3204925 | 100 | 515 | 1.20E-18 - |
| BPSL0533 | DNA-directed RNA polymerase subunit N               | 585023 | 586531 - | 502  | 53718172 | 3094832 rpoN | COG1508K           | GGCTCGCGCGCGCGTGCCTGCTCC    | 1 | 103 | 1   | 103 | 100 | 8m_ATCC23344_chr1 | 3510148 | 3203165 | 3203267 | 99  | 506 | 3.00E-18 + |
| BPSL0538 | hypothetical protein BPSL0538                       | 589316 | 590299 - | 327  | 53718177 | 3092678 -    | COG0517R, COG0794M | CGCCGCGCAACGGACCGCGGGGTG    | 1 | 103 | 1   | 103 | 100 | 8m_ATCC23344_chr1 | 3510148 | 3199397 | 3199499 | 100 | 515 | 1.20E-18 + |
| BPSL0539 | sodium/hydrogen exchanger family protein            | 590427 | 592436 + | 669  | 53718178 | 3092679 -    | COG0475P, COG1226P | CGCCGCGCGGGCGCCCTTGCCGCC    | 1 | 103 | 103 | 1   | 100 | 8m_ATCC23344_chr1 | 3510148 | 3199367 | 3199469 | 100 | 515 | 1.20E-18 - |
| BPSL0540 | adenine phosphoribosyltransferase                   | 592520 | 593083 + | 187  | 53718179 | 3093043 -    | COG0503F           | CGCCGGCGCGCGCGCTGTGTTCAC    | 1 | 86  | 86  | 1   | 100 | 8m_ATCC23344_chr1 | 3510148 | 3197274 | 3197359 | 100 | 430 | 8.00E-15 - |
| BPSL0541 | LysE type translocator                              | 593177 | 593791 + | 204  | 53718180 | 3094204 -    | COG1280E           | GCGCGCGCGCGCGCGCGCGCGCG     | 1 | 96  | 96  | 1   | 100 | 8m_ATCC23344_chr1 | 3510148 | 3196618 | 3196713 | 98  | 471 | 1.10E-16 + |
| BPSL0543 | formyltetrahydrofolate deformylase                  | 594713 | 595594 + | 293  | 53718182 | 3094057 -    | COG0788F           | GCGCGCGCGCATTTGTCGGAAGATTI  | 1 | 54  | 54  | 1   | 100 | 8m_ATCC23344_chr1 | 3510148 | 3195112 | 3195165 | 100 | 270 | 1.40E-07 - |
| BPSL0544 | hypothetical protein BPSL0544                       | 595893 | 596927 - | 344  | 53718183 | 3093773 -    | COG0628R           | CGCTTGCGGGCAAGCGCGCGCGCA    | 1 | 103 | 1   | 103 | 100 | 8m_ATCC23344_chr1 | 3510148 | 3192803 | 3192905 | 99  | 506 | 3.00E-18 + |
| BPSL0545 | exonuclease ABC subunit A                           | 597179 | 600046 + | 955  | 53718184 | 3091749 uvrA | COG0178L           | CGCTCGCGGAGGCGCGCGGGGAATT   | 1 | 103 | 1   | 103 | 100 | 8m_ATCC23344_chr1 | 3510148 | 3189666 | 3189768 | 100 | 515 | 1.20E-18 + |
| BPSL0546 | putative transporter protein                        | 600260 | 601447 + | 395  | 53718185 | 3093774 -    | NULL               | CGCGCGCGCACAGGCGCGCGCGCG    | 1 | 103 | 103 | 1   | 100 | 8m_ATCC23344_chr1 | 3510148 | 3189550 | 3189652 | 100 | 515 | 1.20E-18 - |
| BPSL0591 | hypothetical protein BPSL0591                       | 660133 | 663417 - | 1094 | 53718234 | 3092207 -    | NULL               | TCGATGCGCTCATCGTGTTCGCGCG   | 1 | 103 | 103 | 1   | 100 | 8m_ATCC23344_chr1 | 3510148 | 17167   | 17269   | 100 | 515 | 1.20E-18 - |
| BPSL0595 | hypothetical protein BPSL0595                       | 666528 | 666893 - | 121  | 53718238 | 3093649 -    | NULL               | AATGGATTITGACGATCATCTCGCC   | 1 | 103 | 103 | 1   | 100 | 8m_ATCC23344_chr1 | 3510148 | 20639   | 20741   | 100 | 515 | 1.20E-18 - |
| BPSL0596 | putative DNA-binding protein                        | 667141 | 668148 + | 335  | 53718239 | 3094462 -    | COG1716T           | ACAGAATCTGATATTGCAAGCGTCAA  | 1 | 103 | 1   | 103 | 100 | 8m_ATCC23344_chr1 | 3510148 | 20789   | 20891   | 99  | 506 | 3.00E-18 + |
| BPSL0601 | hypothetical protein BPSL0601                       | 675423 | 676199 + | 258  | 53718244 | 3092919 -    | COG0235G           | CGCGGGCGCGCGCGCGCGGGCTTC    | 1 | 72  | 1   | 72  | 100 | 8m_ATCC23344_chr1 | 3510148 | 20903   | 29164   | 100 | 360 | 1.20E-11 + |
| BPSL0602 | hypothetical protein BPSL0602                       | 676682 | 679045 + | 787  | 53718245 | 3092194 -    | COG5001T           | GTGCTCGAAATGTTCGCGGCTGTCT   | 1 | 103 | 1   | 103 | 100 | 8m_ATCC23344_chr1 | 3510148 | 30321   | 30423   | 98  | 497 | 7.60E-18 + |
| BPSL0603 | putative polysaccharide biosynthesis protein        | 679223 | 680491 - | 422  | 53718246 | 3092195 -    | COG2244R           | CGCATCGGCTCACTCGCCGCGCGCG   | 1 | 79  | 79  | 1   | 100 | 8m_ATCC23344_chr1 | 3510148 | 34228   | 34306   | 100 | 395 | 3.10E-13 - |
| BPSL0606 | hypothetical protein BPSL0606                       | 683388 | 684038 - | 216  | 53718249 | 3094502 -    | COG2153R           | TTGCACCATAGGCGCGCTCGGAAG    | 1 | 103 | 103 | 1   | 100 | 8m_ATCC23344_chr1 | 3510148 | 37775   | 37877   | 100 | 515 | 1.20E-18 - |
| BPSL0607 | putative glycosyl transferase                       | 684416 | 685657 + | 413  | 53718250 | 3092454 -    | COG0438M           | TGCGATGACGGCGCGCGACCGCTGC   | 1 | 103 | 1   | 103 | 100 | 8m_ATCC23344_chr1 | 3510148 | 38055   | 38157   | 100 | 515 | 1.20E-18 + |
| BPSL0609 | fis family regulatory protein                       | 687164 | 688552 + | 462  | 53718252 | 3094535 -    | COG2204T           | TCCCATCTCGGCTGCGTGC CGCGGT  | 1 | 103 | 1   | 103 | 100 | 8m_ATCC23344_chr1 | 3510148 | 40803   | 40905   | 99  | 506 | 3.00E-18 + |
| BPSL0615 | acyl carrier protein                                | 696372 | 696674 - | 100  | 53718258 | 3094361 -    | COG0236U           | ACGGCGCGCGCGCGCGCGGACGCG    | 1 | 103 | 103 | 2   | 99  | 8m_ATCC23344_chr1 | 3510148 | 50411   | 50512   | 99  | 501 | 5.00E-18 - |
| BPSL0616 | hypothetical protein BPSL0616                       | 696875 | 697669 - | 264  | 53718259 | 3094362 -    | COG0664T           | ATAAAAATCTGTAACCTGTCTAGCCG  | 1 | 103 | 103 | 1   | 100 | 8m_ATCC23344_chr1 | 3510148 | 51399   | 51501   | 100 | 515 | 1.20E-18 - |
| BPSL0617 | hypothetical protein BPSL0617                       | 698536 | 699402 + | 288  | 53718260 | 3092616 -    | COG0664T           | TCACCCCGCGCAAGAGGGTGTGTCG   | 1 | 103 | 1   | 103 | 100 | 8m_ATCC23344_chr1 | 3510148 | 52168   | 52270   | 100 | 515 | 1.20E-18 + |
| BPSL0619 | putative polysaccharide biosynthesis/export protein | 700889 | 702178 - | 429  | 53718262 | 3093431 -    | NULL               | GCGCGCGCGCGTTCGCGCGCAAGCG   | 1 | 74  | 1   | 74  | 100 | 8m_ATCC23344_chr1 | 3510148 | 54550   | 54623   | 100 | 370 | 4.10E-12 + |
| BPSL0620 | glycosyl transferase group 1 protein                | 702458 | 703603 + | 381  | 53718263 | 3094302 -    | COG0438M           | CATGAATCTGTCTTCCCGTTATACCA  | 1 | 103 | 1   | 103 | 100 | 8m_ATCC23344_chr1 | 3510148 | 56090   | 56192   | 99  | 506 | 3.00E-18 + |
| BPSL0621 | hypothetical protein BPSL0621                       | 703632 | 704531 - | 299  | 53718264 | 3091729 -    | NULL               | CCCCGTTTCTACAGTGC CGCGCGTCC | 1 | 103 | 103 | 1   | 100 | 8m_ATCC23344_chr1 | 3510148 | 58261   | 58363   | 99  | 506 | 3.00E-18 - |
| BPSL0623 | putative hydrolase                                  | 705775 | 706740 + | 321  | 53718266 | 3092112 -    | COG0657I           | GCCCGCGACCGCGATTAGAGGGAG    | 1 | 94  | 1   | 94  | 100 | 8m_ATCC23344_chr1 | 3510148 | 181068  | 181161  | 100 | 470 | 1.30E-16 + |
| BPSL0624 | putative protease                                   | 706710 | 707624 - | 304  | 53718267 | 3092113 -    | NULL               | TTCTGTCAACTTTTGATGCGTCAACI  | 1 | 103 | 103 | 1   | 100 | 8m_ATCC23344_chr1 | 3510148 | 183006  | 183108  | 100 | 515 | 1.20E-18 - |
| BPSL0625 | putative transport protein                          | 707731 | 709326 + | 531  | 53718268 | 3094261 -    | NULL               | CCTTCGGGACCGCGCGTGC GCGATG  | 1 | 103 | 1   | 103 | 100 | 8m_ATCC23344_chr1 | 3510148 | 183015  | 183117  | 100 | 515 | 1.20E-18 + |
| BPSL0627 | family C56 unassigned peptidase                     | 709927 | 710508 - | 193  | 53718270 | 3092409 -    | COG0693R           | GTCACGCGCGCTTCACGCCCCCGTC   | 1 | 103 | 103 | 1   | 100 | 8m_ATCC23344_chr1 | 3510148 | 185890  | 185992  | 100 | 515 | 1.20E-18 - |
| BPSL0629 | RpiR family regulatory protein                      | 712076 | 712969 + | 297  | 53718272 | 3093819 -    | COG1737K           | GTTGACTTCGCGATAGTACGAGAAAC  | 1 | 103 | 1   | 103 | 100 | 8m_ATCC23344_chr1 | 3510148 | 187345  | 187447  | 99  | 506 | 3.00E-18 + |
| BPSL0633 | threonine dehydratase                               | 716147 | 717670 - | 507  | 53718276 | 3092379 ilvA | COG1171E           | CGTCCGGAAGCTCGGTAGCCATTCCT  | 1 | 103 | 103 | 1   | 100 | 8m_ATCC23344_chr1 | 3510148 | 192989  | 193091  | 100 | 515 | 1.20E-18 - |
| BPSL0634 | putative oxidoreductase                             | 718126 | 722205 + | 1359 | 53718277 | 3092290 -    | COG0247C, COG0277C | GGCACGCGCGCTGC GCGCGATCGT   | 1 | 103 | 1   | 103 | 100 | 8m_ATCC23344_chr1 | 3510148 | 193347  | 193449  | 100 | 515 | 1.20E-18 + |
| BPSL0638 | hypothetical protein BPSL0638                       | 723962 | 724933 + | 323  | 53718281 | 3091452 -    | COG4395S           | GGGGTTCATCCATACATATTCCTTT   | 1 | 92  | 1   | 92  | 100 | 8m_ATCC23344_chr1 | 3510148 | 199194  | 199285  | 100 | 460 | 3.50E-16 + |
| BPSL0639 | hypothetical protein BPSL0639                       | 725014 | 725688 + | 224  | 53718282 | 3091453 -    | NULL               | CGGAAGTCGGCGCGCGCGTCTGCG    | 1 | 83  | 1   | 83  | 100 | 8m_ATCC23344_chr1 | 3510148 | 200255  | 200337  | 100 | 415 | 3.80E-14 + |
| BPSL0642 | hypothetical protein BPSL0642                       | 728344 | 728685 + | 113  | 53718285 | 3092398 -    | COG2331S           | CGCGCGCGCGCGCGGACCGGGGGI    |   |     |     |     |     |                   |         |         |         |     |     |            |

|          |                                                     |        |          |     |          |              |           |                            |   |     |     |     |                       |         |        |        |     |     |            |
|----------|-----------------------------------------------------|--------|----------|-----|----------|--------------|-----------|----------------------------|---|-----|-----|-----|-----------------------|---------|--------|--------|-----|-----|------------|
| BPSL0668 | glycyl-tRNA synthetase alpha subunit                | 759664 | 760671 - | 335 | 53718311 | 3094758 glyQ | NULL      | AGCACAGACCCAAAGCCGGCGCCG   | 1 | 103 | 103 | 1   | 100 Bm_ATCC23344_chr1 | 3510148 | 235977 | 236079 | 100 | 515 | 1.20E-18 - |
| BPSL0670 | putative cation transporter efflux protein          | 762676 | 763563 - | 295 | 53718313 | 3093851 -    | COG45335P | TTGCGCCCGCGCGCCCTCCGCGCC   | 1 | 103 | 103 | 1   | 100 Bm_ATCC23344_chr1 | 3510148 | 238869 | 238970 | 99  | 500 | 5.50E-18 - |
| BPSL0672 | hypothetical protein BPSL0672                       | 764729 | 765544 - | 271 | 53718315 | 3093081 -    | COG0319R  | CCGCGCGCGCGCCCTCTCCGCC     | 1 | 103 | 103 | 1   | 100 Bm_ATCC23344_chr1 | 3510148 | 240839 | 240940 | 99  | 500 | 5.50E-18 - |
| BPSL0674 | putative tRNA thiotransferase protein MiaB          | 767263 | 768636 - | 457 | 53718317 | 3093127 miaB | COG0621J  | GTACGCGCGCGCATCGCGCGCT     | 1 | 103 | 103 | 1   | 100 Bm_ATCC23344_chr1 | 3510148 | 243972 | 244074 | 100 | 515 | 1.20E-18 - |
| BPSL0675 | putative LysR family transcriptional regulator      | 769122 | 770054 - | 310 | 53718318 | 3092721 -    | COG0583K  | CGCATCAAGAAATCTGACGAGCGG   | 1 | 103 | 103 | 1   | 100 Bm_ATCC23344_chr1 | 3510148 | 245390 | 245492 | 99  | 506 | 3.00E-18 - |
| BPSL0676 | putative transmembrane transporter protein          | 770200 | 771372 - | 390 | 53718319 | 3092722 -    | COG2814G  | TTATCAAAAAATCTCGGATGGGGA   | 1 | 103 | 1   | 103 | 100 Bm_ATCC23344_chr1 | 3510148 | 245438 | 245440 | 99  | 506 | 3.00E-18 + |
| BPSL0677 | putative DNA binding protein                        | 771506 | 772174 + | 222 | 53718320 | 3094245 -    | NULL      | TAAACAGTGTGAAGATAACTTTGTT  | 1 | 103 | 1   | 103 | 100 Bm_ATCC23344_chr1 | 3510148 | 246744 | 246846 | 100 | 515 | 1.20E-18 - |
| BPSL0678 | putative 3,4-dihydroxy-2-butanone 4-phosphate syn   | 772598 | 773320 + | 240 | 53718321 | 3092772 ribB | NULL      | GGCTTCGTCCGCGCGCGCGCGAAG   | 1 | 103 | 1   | 103 | 100 Bm_ATCC23344_chr1 | 3510148 | 247831 | 247933 | 99  | 506 | 3.00E-18 + |
| BPSL0679 | putative hydrolase protein                          | 773388 | 774074 - | 228 | 53718322 | 3094246 -    | COG0637R  | TCATTCGGCGCGCGTGTCCGCGCG   | 1 | 103 | 103 | 1   | 100 Bm_ATCC23344_chr1 | 3510148 | 249405 | 249507 | 100 | 515 | 1.20E-18 - |
| BPSL0680 | hypothetical protein BPSL0680                       | 774204 | 775058 - | 284 | 53718323 | 3093650 -    | NULL      | GCCGCGCGCGCGCGCGCGCGGAI    | 1 | 91  | 91  | 1   | 100 Bm_ATCC23344_chr1 | 3510148 | 250389 | 250479 | 100 | 455 | 6.00E-16 - |
| BPSL0685 | hypothetical protein BPSL0685                       | 780710 | 781132 - | 140 | 53718328 | 3093001 -    | COG0251J  | CAAGTCCGACATTCTGAAATCTTCA  | 1 | 103 | 103 | 1   | 100 Bm_ATCC23344_chr1 | 3510148 | 256458 | 256560 | 100 | 515 | 1.20E-18 - |
| BPSL0686 | putative glycerol uptake facilitator protein        | 782049 | 782765 - | 238 | 53718329 | 3093044 glpF | NULL      | GGCATCCGTATCATCAACATTTCAA  | 1 | 103 | 103 | 1   | 100 Bm_ATCC23344_chr1 | 3510148 | 258091 | 258193 | 99  | 506 | 3.00E-18 - |
| BPSL0687 | glycerol kinase                                     | 782878 | 784380 - | 500 | 53718330 | 3092942 glpK | COG0554C  | GCGCACGACGCGCGCACCGACGAF   | 1 | 103 | 103 | 1   | 100 Bm_ATCC23344_chr1 | 3510148 | 259706 | 259808 | 100 | 515 | 1.20E-18 - |
| BPSL0688 | putative glycerol-3-phosphate dehydrogenase         | 784486 | 786018 - | 510 | 53718331 | 3093043 glpD | COG0578C  | TCAAAAGCGAACTTACTTTTTCGAT  | 1 | 103 | 103 | 1   | 100 Bm_ATCC23344_chr1 | 3510148 | 261344 | 261446 | 100 | 515 | 1.20E-18 - |
| BPSL0689 | hypothetical protein BPSL0689                       | 786186 | 786557 + | 123 | 53718332 | 3094507 -    | NULL      | GAACATAATCAAAAAAGTAAAGTTC  | 1 | 103 | 1   | 103 | 100 Bm_ATCC23344_chr1 | 3510148 | 261414 | 261516 | 100 | 515 | 1.20E-18 + |
| BPSL0690 | hypothetical protein BPSL0690                       | 786624 | 786833 - | 69  | 53718333 | 3094508 -    | NULL      | ACGTCAATAAACGCCAAGCGCGGGA  | 1 | 103 | 103 | 1   | 100 Bm_ATCC23344_chr1 | 3510148 | 262159 | 262261 | 100 | 515 | 1.20E-18 - |
| BPSL0691 | putative DeoR family glycerol-3-phosphate regulon   | 787140 | 787976 - | 278 | 53718334 | 3092943 glpR | COG1349KG | ATGAATGCGCGCGCAAGACATGATC  | 1 | 103 | 103 | 1   | 100 Bm_ATCC23344_chr1 | 3510148 | 263304 | 263406 | 100 | 515 | 1.20E-18 - |
| BPSL0692 | gamma-glutamyltransferase 2                         | 788147 | 789820 + | 557 | 53718335 | 3091752 -    | NULL      | AGACTCGATTATGTTCTTGCGCGCA  | 1 | 103 | 1   | 103 | 100 Bm_ATCC23344_chr1 | 3510148 | 263377 | 263479 | 100 | 515 | 1.20E-18 + |
| BPSL0693 | hypothetical protein BPSL0693                       | 790123 | 790956 + | 277 | 53718336 | 3091753 -    | NULL      | GTGTGGAATAACCGATTCTCAACGCG | 1 | 103 | 1   | 103 | 100 Bm_ATCC23344_chr1 | 3510148 | 265533 | 265455 | 100 | 515 | 1.20E-18 + |
| BPSL0694 | hypothetical protein BPSL0694                       | 791026 | 791526 + | 166 | 53718337 | 3092944 -    | NULL      | GCGTCGGGTGCGTGGCGCGCGGTA   | 1 | 72  | 1   | 72  | 100 Bm_ATCC23344_chr1 | 3510148 | 266287 | 266358 | 100 | 360 | 1.20E-11 + |
| BPSL0697 | putative periplasmic cytochrome c protein           | 794567 | 795328 - | 253 | 53718340 | 3092201 -    | COG2863C  | ATAGTAATTCCGCTGCGCAGCAGCC  | 1 | 103 | 103 | 1   | 100 Bm_ATCC23344_chr1 | 3510148 | 270656 | 270758 | 97  | 488 | 1.90E-17 - |
| BPSL0698 | putative transmembrane transporter protein          | 795753 | 796679 + | 308 | 53718341 | 3092202 -    | NULL      | CTTTTTCTTATTTGGCTGAAAACAC  | 1 | 103 | 1   | 103 | 100 Bm_ATCC23344_chr1 | 3510148 | 270980 | 271082 | 100 | 515 | 1.20E-18 + |
| BPSL0699 | putative galactonate dehydratase protein            | 797270 | 798418 - | 382 | 53718342 | 3093666 -    | COG4948MR | TCACATGTGTGCAACGGCGCGCAT   | 1 | 103 | 103 | 1   | 100 Bm_ATCC23344_chr1 | 3510148 | 273587 | 273689 | 100 | 515 | 1.20E-18 - |
| BPSL0700 | hypothetical protein BPSL0700                       | 798874 | 799221 + | 115 | 53718343 | 3093667 -    | COG3791S  | TGCGATTTCGCCCGCGCGCGGTFA   | 1 | 103 | 1   | 103 | 100 Bm_ATCC23344_chr1 | 3510148 | 273932 | 274034 | 100 | 515 | 1.20E-18 + |
| BPSL0702 | calcieneurin-like phosphoesterase                   | 800104 | 801786 + | 560 | 53718345 | 3094055 -    | COG1409R  | CGCGTCACGATCCCGCTCATAGGI   | 1 | 103 | 1   | 103 | 100 Bm_ATCC23344_chr1 | 3510148 | 275193 | 275295 | 99  | 506 | 3.00E-18 - |
| BPSL0704 | putative two-component response regulator protein   | 803697 | 805016 - | 439 | 53718347 | 3093007 -    | COG3437TK | CGCCATCGCGCGCGGATGCGCGCA   | 1 | 103 | 103 | 1   | 100 Bm_ATCC23344_chr1 | 3510148 | 280203 | 280305 | 100 | 515 | 1.20E-18 - |
| BPSL0705 | hypothetical protein BPSL0705                       | 805804 | 806385 + | 193 | 53718348 | 3094234 -    | NULL      | GCGCGCGACGGCATCGAGTGCTCTC  | 1 | 103 | 1   | 103 | 100 Bm_ATCC23344_chr1 | 3510148 | 280894 | 280996 | 100 | 515 | 1.20E-18 - |
| BPSL0773 | putative transmembrane transport protein            | 898930 | 900600 - | 556 | 53718412 | 3093588 -    | NULL      | CGCTTTTTTGACGCGCGCGAGTAG   | 1 | 103 | 103 | 1   | 100 Bm_ATCC23344_chr1 | 3510148 | 287426 | 287528 | 100 | 515 | 1.20E-18 - |
| BPSL0775 | response regulator transcription regulatory protein | 902391 | 903134 - | 247 | 53718414 | 3093154 -    | COG0745TK | CAGTGGTTATGTCAAGCCCGCGTGT  | 1 | 103 | 103 | 1   | 100 Bm_ATCC23344_chr1 | 3510148 | 289921 | 290023 | 100 | 515 | 1.20E-18 - |
| BPSL0776 | recombinase A                                       | 903338 | 904408 + | 356 | 53718415 | 3094325 recA | COG0468L  | TTTTATACAGTGTCTGCATTGCGG   | 1 | 103 | 1   | 103 | 100 Bm_ATCC23344_chr1 | 3510148 | 290027 | 290129 | 100 | 515 | 1.20E-18 + |
| BPSL0777 | RecA regulator RecX                                 | 904774 | 905391 + | 205 | 53718416 | 3094326 recX | COG2137R  | CGGTGGCGCGGAGGCGGTTCGCGG   | 1 | 103 | 1   | 103 | 100 Bm_ATCC23344_chr1 | 3510148 | 291463 | 291565 | 100 | 515 | 1.20E-18 + |
| BPSL0778 | hypothetical protein BPSL0778                       | 905683 | 906294 + | 203 | 53718417 | 3093914 -    | NULL      | TTCCCCCAAATCCTCGGAAACCCG   | 1 | 103 | 1   | 103 | 100 Bm_ATCC23344_chr1 | 3510148 | 292372 | 292474 | 100 | 515 | 1.20E-18 - |
| BPSL0779 | succinyl-CoA synthetase subunit beta                | 906374 | 907540 + | 388 | 53718418 | 3093010 sucC | COG0045C  | GGGCGAAAGCGCTTGAATCTGCGAA  | 1 | 82  | 1   | 82  | 100 Bm_ATCC23344_chr1 | 3510148 | 293084 | 293165 | 100 | 410 | 6.40E-14 + |
| BPSL0780 | succinyl-CoA synthetase alpha subunit               | 907685 | 908566 + | 293 | 53718419 | 3092908 sucD | COG0074C  | CGGGAAGACTGCGGGGCAAGCCGCG  | 1 | 103 | 1   | 103 | 100 Bm_ATCC23344_chr1 | 3510148 | 294374 | 294476 | 100 | 515 | 1.20E-18 - |
| BPSL0781 | hypothetical protein BPSL0781                       | 908618 | 909430 + | 270 | 53718420 | 3093915 -    | COG0861P  | GCATCGGTTTATCGCGCGCGGCAAA  | 1 | 54  | 1   | 54  | 100 Bm_ATCC23344_chr1 | 3510148 | 295356 | 295409 | 100 | 270 | 1.40E-07 + |
| BPSL0782 | putative type 4 fimbrial pilin protein              | 909649 | 910167 + | 172 | 53718421 | 3092148 -    | COG4969NU | CGATGTTCTTTCGTTTACCGCGCG   | 1 | 103 | 1   | 103 | 100 Bm_ATCC23344_chr1 | 3510148 | 296338 | 296440 | 100 | 515 | 1.20E-18 - |
| BPSL0783 | hypothetical protein BPSL0783                       | 910375 | 912192 + | 605 | 53718422 | 3092149 -    | NULL      | GCGCGGGCGCGCGCGCGCGCGCG    | 1 | 103 | 1   | 103 | 100 Bm_ATCC23344_chr1 | 3510148 | 297064 | 297166 | 100 | 515 | 1.20E-18 + |
| BPSL0784 | hypothetical protein BPSL0784                       | 912788 | 913261 + | 157 | 53718423 | 3094398 -    | NULL      | CATCGCGCGCGCGAGCGCGGTAT    | 1 | 103 | 1   | 103 | 100 Bm_ATCC23344_chr1 | 3510148 | 299420 | 299522 | 100 | 515 | 1.20E-18 + |
| BPSL0785 | putative lipoprotein                                | 913498 | 913863 + | 121 | 53718424 | 3094399 -    | NULL      | AAACATCGGGCGAAGAAAGCGGCG   | 1 | 103 | 1   | 103 | 100 Bm_ATCC23344_chr1 | 3510148 | 300130 | 300232 | 100 | 515 | 1.20E-18 - |
| BPSL0787 | hypothetical protein BPSL0787                       | 914698 | 916422 + | 574 | 53718426 | 3093163 -    | COG4783R  | GCGCGCGCGCGCGACGCGGAGCG    | 1 | 103 | 1   | 103 | 100 Bm_ATCC23344_chr1 | 3510148 | 302659 | 302761 | 100 | 515 | 1.20E-18 + |
| BPSL0790 | hypothetical protein BPSL0790                       | 918418 | 918864 - | 68  | 53718429 | 3092710 -    | NULL      | CCCGCGACCCGCGACCCGATCACCI  | 1 | 103 | 103 | 1   | 100 Bm_ATCC23344_chr1 | 3510148 | 306915 | 307017 | 100 | 515 | 1.20E-18 - |
| BPSL0792 | hypothetical protein BPSL0792                       | 920164 | 920361 - | 145 | 53718431 | 3092094 -    | COG4391S  | CCCGGAACTCGCGCGCGCGCGCAC   | 1 | 68  | 68  | 1   | 100 Bm_ATCC23344_chr1 | 3510148 | 308412 | 308479 | 100 | 340 | 9.30E-11 - |
| BPSL0793 | branched-chain amino acid aminotransferase          | 920427 | 921350 - | 307 | 53718432 | 3093889 ilvE | COG0115EH | CACGTACAAAAACGCTAAAATGAGI  | 1 | 103 | 103 | 1   | 100 Bm_ATCC23344_chr1 | 3510148 | 309401 | 309503 | 100 | 515 | 1.20E-18 - |
| BPSL0794 | AzIc family protein                                 | 921572 | 922321 + | 249 | 53718433 | 3092095 -    | COG1296E  | CGCGCGCTATAACTAAGCGTCAAGT  | 1 | 103 | 1   | 103 | 100 Bm_ATCC23344_chr1 | 3510148 | 309525 | 309627 | 100 | 515 | 1.20E-18 + |
| BPSL0796 | phosphoglycerate kinase                             | 922908 | 924101 + | 397 | 53718435 | 3092746 pgk  | NULL      | GCGGGCGCTCGCGCGCGCAAGCGG   | 1 | 103 | 1   | 103 | 100 Bm_ATCC23344_chr1 | 3510148 | 310861 | 310963 | 100 | 515 | 1.20E-18 - |
| BPSL0797 | pyruvate kinase                                     | 924436 | 925872 + | 478 | 53718436 | 3093639 pykA | NULL      | CGCACCGCGCGCGCTTCGGAAGCG   | 1 | 103 | 1   | 103 | 100 Bm_ATCC23344_chr1 | 3510148 | 312389 | 312491 | 100 | 515 | 1.20E-18 + |
| BPSL0798 | fructose-bisphosphate aldolase                      | 926153 | 927217 + | 354 | 53718437 | 3092411 cbbA | COG0191G  | AGTATTTCGAGCTTGCGCGCGCGG   | 1 | 103 | 1   | 103 | 100 Bm_ATCC23344_chr1 | 3510148 | 314106 | 314208 | 100 | 515 | 1.20E-18 + |
| BPSL0799 | phosphoribosylaminoimidazole-succinocarboxamide     | 927407 | 928297 + | 296 | 53718438 | 3094817 hemH | NULL      | GCGCGCGCGCGGTTCGCCGAAGTAT  | 1 | 103 | 1   | 103 | 100 Bm_ATCC23344_chr1 | 3510148 | 315360 | 315462 | 100 | 515 | 1.20E-18 + |
| BPSL0801 | phosphoribosylaminoimidazole carboxylase            | 928931 | 930127 + | 398 | 53718440 | 3091911 purK | COG0026F  | GCGCGCGCGCGGAGCGCTTGCAAA   | 1 | 82  | 1   | 82  | 100 Bm_ATCC23344_chr1 | 3510148 | 316905 | 316986 | 100 | 410 | 6.40E-14 + |
| BPSL0803 | putative acylhydrolase                              | 931480 | 932619 + | 379 | 53718442 | 3094179 -    | COG3240IR | ACGAGGCTTCACAACTATTCGCGCC  | 1 | 103 | 103 | 1   | 100 Bm_ATCC23344_chr1 | 3510148 | 320608 | 320710 | 100 | 515 | 1.20E-18 - |
| BPSL0804 | hypothetical protein BPSL0804                       | 932724 | 933641 - | 305 | 53718443 | 3094180 -    | COG3000I  | TGCGTACCTTTTGTCTGCAATTGAC  | 1 | 103 | 103 | 1   | 100 Bm_ATCC23344_chr1 | 3510148 | 321630 | 321732 | 100 | 515 | 1.20E-18 - |
| BPSL0805 | family S13 unassigned peptidase                     | 934041 | 935492 - | 483 | 53718444 | 3093045 -    | COG2027M  | GCATTCTGTCATGAATCACACGCGC  | 1 | 103 | 103 | 1   | 100 Bm_ATCC23344_chr1 | 3510148 | 323469 | 323571 | 100 | 515 | 1.20E-18 - |
| BPSL0806 | response regulator protein                          | 935760 | 936422 + | 220 | 53718445 | 3093046 -    | COG0745TK | GCGCGCGCGAGCAGCGTTCGGAATC  | 1 | 103 | 1   | 103 | 100 Bm_ATCC23344_chr1 | 3510148 | 323639 | 323741 | 100 | 515 | 1.20E-18 + |
| BPSL0808 | subfamily S1C unassigned peptidase                  | 938273 | 939691 + | 472 | 53718447 | 3092688 -    | COG0265O  | CGTTCAAGCCATTAGATGAGGAGAC  | 1 | 103 | 1   | 103 | 100 Bm_ATCC23344_chr1 | 3510148 | 326152 | 326254 | 100 | 515 | 1.20E-18 + |
| BPSL0809 | hypothetical protein BPSL0809                       | 939851 | 940273 + | 140 | 53718448 | 3093613 -    | NULL      | GTCGCGCGCTGCGCGCGTGC       |   |     |     |     |                       |         |        |        |     |     |            |

|           |                                                         |         |            |     |          |              |            |                             |   |     |     |     |                       |         |         |         |     |     |            |
|-----------|---------------------------------------------------------|---------|------------|-----|----------|--------------|------------|-----------------------------|---|-----|-----|-----|-----------------------|---------|---------|---------|-----|-----|------------|
| BPSL0849  | AsnC family transcriptional regulator                   | 988476  | 988979 +   | 167 | 53718488 | 3094258 -    | COG1522K   | CATGATAGGCAAAGCCGCGAAGCA    | 1 | 103 | 1   | 103 | 100 Bm_ATCC23344_chr1 | 3510148 | 376732  | 376834  | 100 | 515 | 1.20E-18 + |
| BPSL0850  | hypothetical protein BPSL0850                           | 988966  | 989481 -   | 171 | 53718489 | 3094784 -    | COG1853R   | TCCCGATGACCGCCCTGCTCCTTC    | 1 | 103 | 103 | 1   | 100 Bm_ATCC23344_chr1 | 3510148 | 377835  | 377937  | 100 | 515 | 1.20E-18 - |
| BPSL0853  | putative cyclopropane-fatty-acyl-phospholip synth       | 992374  | 993594 -   | 406 | 53718492 | 3092925 -    | COG2230M   | GGCTTTTGTTTGTTGACTCGCGGGGGG | 1 | 103 | 103 | 1   | 100 Bm_ATCC23344_chr1 | 3510148 | 381939  | 382041  | 100 | 515 | 1.20E-18 - |
| BPSL0854  | pyridoxamine 5'-phosphate oxidase                       | 993726  | 994388 -   | 220 | 53718493 | 3094226 pdxH | COG0259H   | GGCAACGGATAGCCCGCTATTTTGC   | 1 | 103 | 103 | 1   | 100 Bm_ATCC23344_chr1 | 3510148 | 382733  | 382835  | 100 | 515 | 1.20E-18 - |
| BPSL0855  | Thif family protein                                     | 994504  | 995370 +   | 288 | 53718494 | 3091819 -    | COG1179H   | CGAAGGTGGAAAAAATCGCTGGTG    | 1 | 103 | 1   | 103 | 100 Bm_ATCC23344_chr1 | 3510148 | 382751  | 382853  | 100 | 515 | 1.20E-18 + |
| BPSL0857  | hypothetical protein BPSL0857                           | 996545  | 997426 -   | 293 | 53718496 | 3093200 -    | COG1741R   | CGCGCCCGCCGATCCGCGCAAGGAC   | 1 | 103 | 103 | 1   | 100 Bm_ATCC23344_chr1 | 3510148 | 385770  | 385872  | 99  | 506 | 3.00E-18 - |
| BPSL0864  | putative AMP-binding enzyme                             | 1004177 | 1005742 -  | 161 | 53718503 | 3093176 -    | COG0318IQ  | AGACATATTGCCGAACGGCCGATTC   | 1 | 103 | 103 | 1   | 100 Bm_ATCC23344_chr1 | 3510148 | 394071  | 394173  | 100 | 515 | 1.20E-18 - |
| BPSL0865  | hypothetical protein BPSL0865                           | 1005872 | 10066345 + | 523 | 53718504 | 3093177 -    | COG2606S   | GTGCGGACCGGTGTCGGCAGGATTC   | 1 | 103 | 1   | 103 | 100 Bm_ATCC23344_chr1 | 3510148 | 394103  | 394205  | 100 | 515 | 1.20E-18 + |
| BPSL0866  | hypothetical protein BPSL0866                           | 1006472 | 1007083 +  | 203 | 53718505 | 3094044 -    | COG0344S   | CCCCGGTGGCCCGCTGCGCCGCTT    | 1 | 103 | 1   | 103 | 100 Bm_ATCC23344_chr1 | 3510148 | 394703  | 394805  | 100 | 515 | 1.20E-18 - |
| BPSL0867  | hypothetical protein BPSL0867                           | 1007313 | 1007798 -  | 161 | 53718506 | 3094045 -    | NULL       | TTGGGCAAAATGAGGGCGCCGCTG    | 1 | 103 | 103 | 1   | 100 Bm_ATCC23344_chr1 | 3510148 | 396127  | 396229  | 99  | 506 | 3.00E-18 - |
| BPSL0868  | putative UDP-N-acetylenolpyruvylglucosamine redu        | 1007935 | 1008984 +  | 349 | 53718507 | 3091554 murB | COG0812M   | GCATGGGCACCTCGCTATAATTCGGC  | 1 | 103 | 1   | 103 | 100 Bm_ATCC23344_chr1 | 3510148 | 396166  | 396268  | 99  | 506 | 3.00E-18 - |
| BPSL0869  | ornithine carbamoyltransferase                          | 1009176 | 1010105 -  | 309 | 53718508 | 3092982 argf | COG0078E   | CAAAGCGTAAAAAATCTTATGTGCT   | 1 | 103 | 103 | 1   | 100 Bm_ATCC23344_chr1 | 3510148 | 398435  | 398537  | 100 | 515 | 1.20E-18 - |
| BPSL0870  | hypothetical protein BPSL0870                           | 1010519 | 1010854 +  | 111 | 53718509 | 3093781 -    | NULL       | TGCACGTGCGGGCGCGCTCGTCGG    | 1 | 103 | 1   | 103 | 100 Bm_ATCC23344_chr1 | 3510148 | 398751  | 398853  | 99  | 506 | 3.00E-18 + |
| BPSL0871  | 30S ribosomal protein S20                               | 1011098 | 1011376 -  | 92  | 53718510 | 3094377 rpsT | COG0268J   | TTTTGCGTCCCGGGCAATCGCTCC    | 1 | 103 | 103 | 1   | 100 Bm_ATCC23344_chr1 | 3510148 | 399691  | 399793  | 100 | 515 | 1.20E-18 - |
| BPSL0872  | MviN-like protein                                       | 1011781 | 1013331 +  | 516 | 53718511 | 3093782 -    | COG0728R   | GGTGAGCGGGGGCGTCCCGAGCTCC   | 1 | 103 | 1   | 103 | 100 Bm_ATCC23344_chr1 | 3510148 | 399998  | 400100  | 100 | 515 | 1.20E-18 + |
| BPSL0874  | putative short-chain dehydrogenase family protein       | 1014452 | 1015210 -  | 252 | 53718513 | 3091633 -    | COG1028IQR | CGGGCTCTCGGCGCCGCTCGTACAC   | 1 | 103 | 103 | 1   | 100 Bm_ATCC23344_chr1 | 3510148 | 403514  | 403616  | 99  | 506 | 3.00E-18 - |
| BPSL0875  | adenylate kinase                                        | 1015408 | 1016070 -  | 220 | 53718514 | 3091823 adk  | COG0563F   | GAGTCAGCCCGCCGATCGCGGCTT    | 1 | 103 | 1   | 103 | 100 Bm_ATCC23344_chr1 | 3510148 | 2361240 | 2361342 | 100 | 515 | 1.20E-18 + |
| BPSL0876  | 3-deoxy-manno-oxulosonate cytidyltransferase            | 1016279 | 1017115 -  | 278 | 53718515 | 3091448 kdsB | COG1212M   | CGCGCGCTCTCGCACGGCGCCGGC    | 1 | 103 | 1   | 103 | 100 Bm_ATCC23344_chr1 | 3510148 | 2360195 | 2360297 | 100 | 515 | 1.20E-18 - |
| BPSL0878  | tetraacyldisaccharide 4'-kinase                         | 1017431 | 1018459 -  | 342 | 53718517 | 3092050 -    | COG1663M   | CGCGGCTTTCGAAGCAGCGCGGGG    | 1 | 103 | 1   | 103 | 100 Bm_ATCC23344_chr1 | 3510148 | 2358850 | 2358952 | 100 | 515 | 1.20E-18 + |
| BPSL0879  | exodeoxyribonuclease VII large subunit                  | 1018910 | 1020292 +  | 460 | 53718518 | 3091647 -    | COG1570L   | GTTCGCGCGACGTGTGGAAACCTC    | 1 | 103 | 103 | 1   | 100 Bm_ATCC23344_chr1 | 3510148 | 2358490 | 2358592 | 100 | 515 | 1.20E-18 - |
| BPSL0880  | putative superoxide dismutase                           | 1020489 | 1021067 +  | 192 | 53718519 | 3094563 sodB | COG0605P   | AAGGCCCGCGAGTTTGGCGGGTTA'   | 1 | 103 | 103 | 1   | 100 Bm_ATCC23344_chr1 | 3510148 | 2356911 | 2357013 | 100 | 515 | 1.20E-18 - |
| BPSL0882  | putative chromate transporter protein                   | 1023539 | 1024744 -  | 401 | 53718521 | 3092758 -    | COG2059P   | CGCGAGCCCGCCATCGCGCGGAC     | 1 | 103 | 1   | 103 | 100 Bm_ATCC23344_chr1 | 3510148 | 2352758 | 2352860 | 96  | 479 | 4.00E-17 + |
| BPSL0883  | putative regulatory protein                             | 1024978 | 1025733 -  | 251 | 53718522 | 3092759 -    | COG0664T   | CGTGCTCTCCCGATGCGGAGTAGC    | 1 | 87  | 1   | 87  | 100 Bm_ATCC23344_chr1 | 3510148 | 2351785 | 2351871 | 100 | 435 | 4.80E-15 + |
| BPSL0884  | hypothetical protein BPSL0884                           | 1025818 | 1026345 +  | 175 | 53718523 | 3093944 -    | COG4539S   | CGCGCGTGGCGGTGCGCGGATCG     | 1 | 87  | 87  | 1   | 100 Bm_ATCC23344_chr1 | 3510148 | 2351782 | 2351868 | 100 | 435 | 4.80E-15 - |
| BPSL0886  | hypothetical protein BPSL0886                           | 1027910 | 1028515 +  | 201 | 53718525 | 3091854 -    | NULL       | AACGGCCCGCGAAGCATGAAATCC    | 1 | 103 | 103 | 1   | 100 Bm_ATCC23344_chr1 | 3510148 | 2349693 | 2349795 | 97  | 488 | 1.90E-17 - |
| BPSL0887  | hypothetical protein BPSL0887                           | 1028626 | 1029900 -  | 424 | 53718526 | 3091855 -    | NULL       | CGCGCCGCGCGCGACGCGCGGCGI    | 1 | 103 | 1   | 103 | 100 Bm_ATCC23344_chr1 | 3510148 | 2347584 | 2347686 | 100 | 515 | 1.20E-18 + |
| BPSL0888  | putative transporter protein                            | 1030572 | 1032011 -  | 479 | 53718527 | 3093849 -    | NULL       | CGCGCCGCAACGCGCGCGCATCG     | 1 | 103 | 1   | 103 | 100 Bm_ATCC23344_chr1 | 3510148 | 2345502 | 2345604 | 100 | 515 | 1.20E-18 - |
| BPSL0889  | hypothetical protein BPSL0889                           | 1032308 | 1032643 +  | 111 | 53718528 | 3093850 -    | NULL       | TACAGTGGGGAGAGCGCGCGGGA     | 1 | 103 | 103 | 1   | 100 Bm_ATCC23344_chr1 | 3510148 | 2345303 | 2345405 | 100 | 515 | 1.20E-18 - |
| BPSL0891  | GntR family transcriptional regulator                   | 1034684 | 1035430 -  | 248 | 53718530 | 3093798 -    | COG2188K   | AGCGATTTCGGCGCGCGCGCGCC     | 1 | 103 | 1   | 103 | 100 Bm_ATCC23344_chr1 | 3510148 | 2342139 | 2342241 | 98  | 497 | 7.60E-18 + |
| BPSL0892  | putative aldo/keto reductase family oxidoreductase      | 1035599 | 1036444 +  | 281 | 53718531 | 3094218 -    | COG0656R   | CGCGGAGGCGGCGCGCGCGCGCI     | 1 | 103 | 103 | 1   | 100 Bm_ATCC23344_chr1 | 3510148 | 2342068 | 2342170 | 97  | 488 | 1.90E-17 - |
| BPSL0892a | putative lipoprotein                                    | 1036989 | 1038575 -  | 528 | 53718532 | 3094219 -    | NULL       | AGACGATCGGCAATTGGCGAGGCA    | 1 | 103 | 1   | 103 | 100 Bm_ATCC23344_chr1 | 3510148 | 2339042 | 2339144 | 100 | 515 | 1.20E-18 + |
| BPSL0893  | elongation factor EF-2                                  | 1039748 | 1041862 -  | 704 | 53718533 | 3092467 fusA | COG0480J   | CAAAAAGCCACAGCAAGCGCTATG    | 1 | 103 | 1   | 103 | 100 Bm_ATCC23344_chr1 | 3510148 | 2335755 | 2335857 | 100 | 515 | 1.20E-18 - |
| BPSL0894  | hypothetical protein BPSL0894                           | 1042163 | 1042672 -  | 169 | 53718534 | 3092782 -    | COG1430S   | TTTTTCCGCGCTCGCGCCCGCCGAG   | 1 | 103 | 1   | 103 | 100 Bm_ATCC23344_chr1 | 3510148 | 2334939 | 2335047 | 94  | 455 | 6.00E-16 + |
| BPSL0895  | putative pseudouridine synthase                         | 1043345 | 1043923 -  | 192 | 53718535 | 3092783 -    | COG1187J   | ACAAAAGACTCTGCGCTTCGTATTA   | 1 | 103 | 103 | 1   | 100 Bm_ATCC23344_chr1 | 3510148 | 513601  | 513703  | 100 | 515 | 1.20E-18 - |
| BPSL0896  | isocitrate dehydrogenase                                | 1044191 | 1045450 +  | 419 | 53718536 | 3092199 icd  | COG0538C   | ATAGCGGCTCGCGCTTGGGACCGG    | 1 | 103 | 1   | 103 | 100 Bm_ATCC23344_chr1 | 3510148 | 513771  | 513873  | 100 | 515 | 1.20E-18 + |
| BPSL0897  | putative multicopper oxidase                            | 1045618 | 1047237 +  | 539 | 53718537 | 3093301 -    | COG2132Q   | TGGTGGCGCGGCTGCGCGCGTTGT    | 1 | 103 | 1   | 103 | 100 Bm_ATCC23344_chr1 | 3510148 | 515198  | 515300  | 100 | 515 | 1.20E-18 - |
| BPSL0898  | cold shock-like protein                                 | 1047367 | 1047570 -  | 67  | 53718538 | 3093302 -    | NULL       | CGAGGTGAGCTTGTGAGGGGGGAA    | 1 | 103 | 103 | 1   | 100 Bm_ATCC23344_chr1 | 3510148 | 2363885 | 2363987 | 100 | 515 | 1.20E-18 - |
| BPSL0898a | ATP-dependent Clp protease adaptor protein ClpS         | 1048103 | 1048417 +  | 104 | 53718539 | 3091700 clpS | NULL       | AGAGGGAGCGTCCGCGACGTGGGC    | 1 | 103 | 1   | 103 | 100 Bm_ATCC23344_chr1 | 3510148 | 2364320 | 2364422 | 100 | 515 | 1.20E-18 + |
| BPSL0969  | dihydroxy-acyl dehydratase                              | 1126530 | 1128203 +  | 557 | 53718611 | 3093888 iivD | NULL       | TTCTTAACAGAAATCGATCTTTTG    | 1 | 103 | 103 | 1   | 100 Bm_ATCC23344_chr1 | 3510148 | 702418  | 702520  | 100 | 515 | 1.20E-18 - |
| BPSL0970  | putative isoleucine biosynthesis transcriptional activa | 1128381 | 1129376 +  | 331 | 53718612 | 3092725 fusA | COG0583K   | AGAATGCAATTTCTGTAGGAGATG    | 1 | 103 | 1   | 103 | 100 Bm_ATCC23344_chr1 | 3510148 | 702498  | 702600  | 98  | 497 | 7.60E-18 + |
| BPSL0971  | prolipoprotein diacylglycerol transferase               | 1129483 | 1130373 +  | 296 | 53718613 | 3094086 lgt  | NULL       | CGCGCGCGCGCGCTCGAATCGCGC    | 1 | 103 | 1   | 103 | 100 Bm_ATCC23344_chr1 | 3510148 | 703604  | 703706  | 99  | 506 | 3.00E-18 - |
| BPSL0972  | hypothetical protein BPSL0972                           | 1130741 | 1131478 -  | 245 | 53718614 | 3093866 -    | COG3471S   | GCGCTGTGCGCGCTGCGCGCGGTG    | 1 | 103 | 103 | 1   | 100 Bm_ATCC23344_chr1 | 3510148 | 705682  | 705784  | 100 | 515 | 1.20E-18 - |
| BPSL0973  | hypothetical protein BPSL0973                           | 1131677 | 1132138 -  | 153 | 53718615 | 3093687 -    | COG2947S   | GCTTAGCGGGTGAAGCGGGGGGCT    | 1 | 103 | 103 | 1   | 100 Bm_ATCC23344_chr1 | 3510148 | 706342  | 706444  | 100 | 515 | 1.20E-18 - |
| BPSL0975  | hypothetical protein BPSL0975                           | 1132789 | 1133139 -  | 116 | 53718617 | 3093259 -    | NULL       | TCTGCGGGAGAGAGCGGGGGTGT     | 1 | 103 | 103 | 1   | 100 Bm_ATCC23344_chr1 | 3510148 | 707343  | 707445  | 100 | 515 | 1.20E-18 - |
| BPSL0976  | putative outer membrane receptor protein                | 1133678 | 1135735 +  | 685 | 53718618 | 3093408 -    | COG4206H   | CCCCGATACCGCGGAGGGCGGGGA    | 1 | 103 | 1   | 103 | 100 Bm_ATCC23344_chr1 | 3510148 | 707785  | 707887  | 100 | 515 | 1.20E-18 - |
| BPSL0977  | putative transmembrane ABC transporter permease         | 1135814 | 1136815 +  | 333 | 53718619 | 3093409 -    | COG0609P   | CGCGCGCGCGCTGCGCGCGCGCG     | 1 | 81  | 1   | 81  | 100 Bm_ATCC23344_chr1 | 3510148 | 709943  | 710023  | 100 | 405 | 1.10E-13 + |
| BPSL0982  | hypothetical protein BPSL0982                           | 1140236 | 1141072 -  | 278 | 53718624 | 3092134 -    | NULL       | CGCGCGCGCGCGCGCGACCGCATG    | 1 | 103 | 103 | 1   | 100 Bm_ATCC23344_chr1 | 3510148 | 715277  | 715379  | 99  | 506 | 3.00E-18 - |
| BPSL0986  | putative bifunctional cobalamin biosynthesis protein    | 1144159 | 1144716 -  | 185 | 53718628 | 3091756 -    | COG2087H   | TGGCGTTGGCGTTGGCAATCATGT    | 1 | 103 | 103 | 1   | 100 Bm_ATCC23344_chr1 | 3510148 | 718909  | 719011  | 100 | 515 | 1.20E-18 - |
| BPSL0989  | ParA family ATPase                                      | 1147399 | 1148022 -  | 207 | 53718631 | 3094388 -    | COG1192D   | GCAAGCCGATTTGCCGATATCATCG   | 1 | 103 | 1   | 103 | 100 Bm_ATCC23344_chr1 | 3510148 | 721494  | 721596  | 100 | 515 | 1.20E-18 + |
| BPSL0990  | aspartate 1-decarboxylase precursor                     | 1148137 | 1148523 -  | 128 | 53718632 | 3093259 panD | NULL       | CGCGCGCGCACGAGCGCGCGCTC     | 1 | 55  | 55  | 1   | 100 Bm_ATCC23344_chr1 | 3510148 | 722721  | 722775  | 100 | 275 | 8.00E-08 - |
| BPSL0991  | pantoate-β-alanine ligase                               | 1148576 | 1149415 -  | 279 | 53718633 | 3093228 panC | NULL       | ATCGCCGACGCTCGACGCCCTCGCI   | 1 | 103 | 103 | 1   | 100 Bm_ATCC23344_chr1 | 3510148 | 723613  | 723715  | 100 | 515 | 1.20E-18 - |
| BPSL0993  | hypothetical protein BPSL0993                           | 1151047 | 1151235 -  | 62  | 53718635 | 3094637 -    | NULL       | TCGACGCGCTTTGCCGCGCGCTGT    | 1 | 103 | 103 | 1   | 100 Bm_ATCC23344_chr1 | 3510148 | 725437  | 725541  | 96  | 477 | 6.10E-17 - |
| BPSL0994  | hypothetical protein BPSL0994                           | 1151442 | 1153259 +  | 605 | 53718636 | 3094638 -    | COG0729M   | GAGCTGCTGTGCGCGAATGTGGCG    | 1 | 103 | 1   | 103 | 100 Bm_ATCC23344_chr1 | 3510148 | 725548  | 725650  | 99  | 506 | 3.00E-18 + |
| BPSL0996  | hypothetical protein BPSL0996                           | 1157739 | 1158449 +  | 236 | 53718638 | 3092185 -    | NULL       | CATGGCAAGCGCGGTGGGCGGGCC    | 1 | 103 | 1   | 103 | 100 Bm_ATCC23344_chr1 | 3510148 | 731845  | 731950  | 95  | 467 | 1.70E-16 + |
| BPSL0998  | m                                                       |         |            |     |          |              |            |                             |   |     |     |     |                       |         |         |         |     |     |            |

|           |                                                         |         |           |     |          |               |                    |                             |   |     |     |     |                           |         |         |         |     |     |            |
|-----------|---------------------------------------------------------|---------|-----------|-----|----------|---------------|--------------------|-----------------------------|---|-----|-----|-----|---------------------------|---------|---------|---------|-----|-----|------------|
| BPSL1026  | NAD(+) synthase                                         | 1194534 | 1196264 + | 576 | 53718666 | 3092495 -     | COG0171H, COG0388R | CGATTGCAATCCGTTTCGTCTGATC   | 1 | 93  | 1   | 93  | 100 Bm_ATCC23344_chr1     | 3510148 | 771549  | 771641  | 98  | 456 | 5.40E-16 + |
| BPSL1027  | nitrogen regulatory protein P-II 2                      | 1196325 | 1196663 + | 112 | 53718667 | 3093736 glnB2 | COG0347E           | CGCGGCGCGCGGCGTGAAGATCGGC   | 1 | 63  | 1   | 63  | 100 Bm_ATCC23344_chr1     | 3510148 | 773370  | 773432  | 100 | 315 | 1.30E-09 + |
| BPSL1029  | putative exported outer membrane porin protein          | 1198437 | 1199537 - | 366 | 53718669 | 3092496 -     | COG3203M           | CGCCGCAACCGGCTGCAGCGGGCTC   | 1 | 103 | 103 | 1   | 100 Bm_ATCC23344_chr1     | 3510148 | 775335  | 775437  | 100 | 515 | 1.20E-18 - |
| BPSL1032  | histidine transport system permease protein             | 1201931 | 1202620 - | 229 | 53718672 | 3094529 hisQ  | COG4215E           | GCCCCGGAAGCGGAGCGGCGCATC    | 1 | 103 | 103 | 1   | 100 Bm_ATCC23344_chr1     | 3510148 | 778419  | 778521  | 100 | 515 | 1.20E-18 - |
| BPSL1033  | histidine-binding periplasmic protein precursor         | 1202831 | 1203607 - | 258 | 53718673 | 3094022 hisJ  | COG0834ET          | GATCGACGAACGGCAATTTGGGCC    | 1 | 103 | 103 | 1   | 100 Bm_ATCC23344_chr1     | 3510148 | 779406  | 779508  | 100 | 515 | 1.20E-18 - |
| BPSL1035  | hypothetical protein BPSL1035                           | 1205046 | 1205744 - | 232 | 53718675 | 3091915 -     | NULL               | GGCGTGGAAGTTTACGTTGTGGGGT   | 1 | 91  | 91  | 1   | 100 Bm_ATCC23344_chr1     | 3510148 | 781532  | 781622  | 100 | 455 | 6.00E-16 - |
| BPSL1038  | hypothetical protein BPSL1038                           | 1207929 | 1208195 - | 88  | 53718678 | 3093799 -     | NULL               | CGGGCGAGCGCGGGCGAGCGCTTCC   | 1 | 103 | 103 | 1   | 100 Bm_ATCC23344_chr1     | 3510148 | 783956  | 784058  | 100 | 515 | 1.20E-18 - |
| BPSL1038a | hypothetical protein BPSL1038a                          | 1208322 | 1208597 - | 91  | 53718679 | 3093800 -     | NULL               | CAGGCGCGCGCGCGCGGCAAGCGCG   | 1 | 97  | 97  | 1   | 100 Bm_ATCC23344_chr1     | 3510148 | 784358  | 784454  | 100 | 485 | 2.60E-17 + |
| BPSL1039  | putative ABC transport system, membrane protein         | 1208692 | 1210449 + | 585 | 53718680 | 3091509 -     | COG4986P           | AACGAATCACGCGACGAGCGCGCC    | 1 | 97  | 1   | 97  | 100 Bm_ATCC23344_chr1     | 3510148 | 784361  | 784457  | 100 | 485 | 2.60E-17 + |
| BPSL1040  | putative ABC transport system, ATP-binding protein      | 1210503 | 1211843 + | 446 | 53718681 | 3091510 -     | COG1116P, COG3842E | CACAGATTGAGACCGATGTGACGC    | 1 | 56  | 1   | 56  | 100 Bm_ATCC23344_chr1     | 3510148 | 786213  | 786268  | 100 | 280 | 4.80E-08 + |
| BPSL1043  | putative lipoprotein                                    | 1212731 | 1213282 - | 183 | 53718684 | 3093837 -     | NULL               | TGTCAAATTTTGTCGATTTCTGTCGG  | 1 | 103 | 103 | 1   | 100 Bm_ATCC23344_chr1     | 3510148 | 3112296 | 3112397 | 97  | 482 | 3.60E-17 + |
| BPSL1044  | alpha, alpha-trehalose-phosphate synthase               | 1213901 | 1215319 + | 472 | 53718685 | 3092835 otsA  | COG0380G           | ACGTTTCAAAATGTCCGAGGTGGG    | 1 | 103 | 1   | 103 | 100 Bm_ATCC23344_chr1     | 3510148 | 3112816 | 3112920 | 97  | 486 | 2.40E-17 + |
| BPSL1046  | hypothetical protein BPSL1046                           | 1216087 | 1216698 - | 203 | 53718687 | 3093344 -     | NULL               | CCGGCTGTCCAATACATCGTGGCCC   | 1 | 103 | 103 | 1   | 100 Bm_ATCC23344_chr1     | 3510148 | 3115713 | 3115815 | 100 | 515 | 1.20E-18 - |
| BPSL1047  | hypothetical protein BPSL1047                           | 1217068 | 1217325 + | 85  | 53718688 | 3093345 -     | NULL               | GTGCGGAGGTTGGCATCGTCTCG     | 1 | 103 | 1   | 103 | 100 Bm_ATCC23344_chr1     | 3510148 | 3115974 | 3116076 | 98  | 497 | 7.60E-18 + |
| BPSL1048  | putative sugar transport, integral membrane protein     | 1217526 | 1218953 - | 475 | 53718689 | 3094165 -     | NULL               | TCCGCCCCCGCGCGCGCGCTCGCCC   | 1 | 72  | 72  | 1   | 100 Bm_ATCC23344_chr1     | 3510148 | 3117890 | 3117961 | 100 | 360 | 1.20E-11 - |
| BPSL1049  | hypothetical protein BPSL1049                           | 1219023 | 1219535 - | 170 | 53718690 | 3094166 -     | COG1881R           | CGCGCGGTTGATACATCGACCGCG    | 1 | 103 | 103 | 1   | 100 Bm_ATCC23344_chr1     | 3510148 | 3118472 | 3118574 | 100 | 515 | 1.20E-18 - |
| BPSL1050  | hypothetical protein BPSL1050                           | 1220110 | 1220490 - | 126 | 53718691 | 3091599 -     | NULL               | AATAGATGCAGCAAGGGGTTAAAGC   | 1 | 103 | 103 | 1   | 100 Bm_ATCC23344_chr1     | 3510148 | 3119427 | 3119529 | 98  | 497 | 7.60E-18 - |
| BPSL1053  | putative lipoprotein                                    | 1221524 | 1221904 - | 126 | 53718692 | 3094633 -     | NULL               | CTTAGCTGATTGTAATGTGCGGACAA  | 1 | 103 | 103 | 1   | 100 Bm_ATCC23344_chr1     | 3510148 | 3120841 | 3120943 | 100 | 515 | 1.20E-18 - |
| BPSL1054  | ecotin precursor                                        | 1222077 | 1222616 + | 179 | 53718693 | 3094320 eco   | NULL               | TTTGTGCCGACATTCAATCAGCTG    | 1 | 103 | 1   | 103 | 100 Bm_ATCC23344_chr1     | 3510148 | 3120916 | 3121018 | 100 | 515 | 1.20E-18 + |
| BPSL1055  | murein-DD-endopeptidase                                 | 1222714 | 1223850 - | 378 | 53718694 | 3094634 -     | COG1686M           | ACACCATACAATACCGCGTGCGCCA   | 1 | 103 | 103 | 1   | 100 Bm_ATCC23344_chr1     | 3510148 | 3122787 | 3122889 | 100 | 515 | 1.20E-18 - |
| BPSL1057  | hypothetical protein BPSL1057                           | 1224788 | 1225264 + | 158 | 53718695 | 3093766 -     | NULL               | ATCCGCGCAATCGCGCGACGGCGCG   | 1 | 103 | 1   | 103 | 100 Bm_ATCC23344_chr1     | 3510148 | 3123627 | 3123729 | 98  | 497 | 7.60E-18 + |
| BPSL1062  | translation initiation factor IF-1                      | 1228340 | 1228606 + | 88  | 53718699 | 3092726 infA  | COG0361J           | TTCCAGATAACGCGGGCGCTCGCC    | 1 | 103 | 1   | 103 | 100 Bm_ATCC23344_chr1     | 3510148 | 2283970 | 2284072 | 100 | 515 | 1.20E-18 + |
| BPSL1065  | hypothetical protein BPSL1065                           | 1230018 | 1231604 - | 528 | 53718702 | 3093116 -     | NULL               | CGGCGCCGACGCGTTTGAAGGATAT   | 1 | 103 | 103 | 1   | 100 Bm_ATCC23344_chr1     | 3510148 | 2287332 | 2287434 | 99  | 506 | 3.00E-18 - |
| BPSL1067  | hypothetical protein BPSL1067                           | 1232690 | 1233145 + | 151 | 53718704 | 3093117 -     | NULL               | GTGTGGCGCCCGCGCGCTGGCGCC    | 1 | 103 | 1   | 103 | 100 Bm_ATCC23344_chr1     | 3510148 | 2288236 | 2288338 | 97  | 488 | 1.90E-17 + |
| BPSL1068  | DNA ABC transport system, ATP-binding protein           | 1233313 | 1235259 + | 648 | 53718705 | 3093263 -     | COG0488R           | CGGCGTTGGCGGTTTGGCGCGCGG    | 1 | 103 | 1   | 103 | 100 Bm_ATCC23344_chr1     | 3510148 | 2288859 | 2288961 | 100 | 515 | 1.20E-18 + |
| BPSL1069  | putative ABC transport system, ATP-binding protein      | 1235465 | 1237447 + | 660 | 53718706 | 3093443 parE  | COG0187L           | TGTGTTTGACCTGCGAATTTTATCGAA | 1 | 103 | 1   | 103 | 100 Bm_ATCC23344_chr1     | 3510148 | 2291011 | 2291113 | 100 | 515 | 1.20E-18 + |
| BPSL1070  | DNA topoisomerase IV subunit A                          | 1237506 | 1239824 + | 772 | 53718707 | 3093260 parC  | COG0188L           | CGCGCGCGCGCGCGCGCGCGCGG     | 1 | 61  | 1   | 61  | 100 Bm_ATCC23344_chr1     | 3510148 | 2293094 | 2293154 | 100 | 305 | 3.60E-09 + |
| BPSL1071  | hypothetical protein BPSL1071                           | 1240517 | 1240975 + | 152 | 53718708 | 3093264 -     | COG5615S           | AACCGCGCGCGCTGCTGGCTGTGCA   | 1 | 103 | 1   | 103 | 100 Bm_ATCC23344_chr1     | 3510148 | 2296063 | 2296165 | 96  | 479 | 4.90E-17 + |
| BPSL1072  | putative LysR-family transcriptional regulatory protein | 1241121 | 1242005 - | 294 | 53718709 | 3093453 -     | COG0583K           | CAATTACAGAGACGAGCAATTTTC    | 1 | 96  | 96  | 1   | 100 Bm_ATCC23344_chr1     | 3510148 | 2297626 | 2297721 | 96  | 453 | 7.30E-16 - |
| BPSL1073  | hypothetical protein BPSL1073                           | 1242099 | 1242566 + | 155 | 53718710 | 3093454 -     | NULL               | CGCGCAATGCTCTTGATATATCGG    | 1 | 96  | 1   | 96  | 100 Bm_ATCC23344_chr1     | 3510148 | 2297629 | 2297724 | 96  | 453 | 7.30E-16 + |
| BPSL1074  | putative LysR family transcriptional regulator          | 1242775 | 1243737 - | 320 | 53718711 | 3091778 -     | COG0583K           | CGTTTATCGGCTCGCAATTAACATT   | 1 | 103 | 103 | 1   | 100 Bm_ATCC23344_chr1     | 3510148 | 2299373 | 2299475 | 100 | 515 | 1.20E-18 - |
| BPSL1075  | putative transport system, integral membrane protein    | 1243953 | 1245266 + | 437 | 53718712 | 3091779 -     | NULL               | CCCGCGTGGCGGCGGCGCGCGGGC    | 1 | 103 | 1   | 103 | 100 Bm_ATCC23344_chr1     | 3510148 | 2299491 | 2299593 | 99  | 506 | 3.00E-18 + |
| BPSL1079  | putative metal transport integral membrane protein      | 1248218 | 1249411 - | 397 | 53718715 | 3093557 -     | COG2059P           | CAACGAACGGGTTTCAAGCTGACA    | 1 | 103 | 103 | 1   | 100 Bm_ATCC23344_chr1     | 3510148 | 2305016 | 2305118 | 100 | 515 | 1.20E-18 - |
| BPSL1080  | hypothetical protein BPSL1080                           | 1249558 | 1251918 - | 786 | 53718716 | 3093558 -     | COG5001T           | CATTCTAGTAATCTGGGCGCTGCTC   | 1 | 103 | 103 | 1   | 100 Bm_ATCC23344_chr1     | 3510148 | 2307523 | 2307625 | 99  | 506 | 3.00E-18 - |
| BPSL1082  | hypothetical protein BPSL1082                           | 1253042 | 1253509 - | 155 | 53718718 | 3094041 -     | COG0251J           | CGCGCTCTGTTCTGCTCAGCAATTA   | 1 | 58  | 58  | 4   | 94.5455 Bm_ATCC23344_chr1 | 3510148 | 2309123 | 2309177 | 96  | 257 | 5.20E-07 - |
| BPSL1085  | hypothetical protein BPSL1085                           | 1255816 | 1256499 - | 227 | 53718721 | 3094532 -     | NULL               | CTGTGCGGTTGCGCGCGGATACAGI   | 1 | 103 | 1   | 103 | 100 Bm_ATCC23344_chr1     | 3510148 | 2048506 | 2048608 | 100 | 515 | 1.20E-18 + |
| BPSL1086  | putative GntR family regulatory protein                 | 1256635 | 1258104 + | 489 | 53718722 | 3094533 -     | COG1167KE          | AACGCGCGCGCGCGCGCGCGCCG     | 1 | 103 | 103 | 1   | 100 Bm_ATCC23344_chr1     | 3510148 | 2048468 | 2048570 | 100 | 515 | 1.20E-18 - |
| BPSL1087  | heat shock protein 90                                   | 1258240 | 1260138 + | 632 | 53718723 | 3091971 htpG  | COG0326O           | AGCGTTGCGCGCGCGCGCGCGCCC    | 1 | 103 | 103 | 1   | 100 Bm_ATCC23344_chr1     | 3510148 | 2046863 | 2046965 | 99  | 506 | 3.00E-18 - |
| BPSL1091  | hypothetical protein BPSL1091                           | 1261467 | 1262396 + | 309 | 53718726 | 3093821 -     | COG0421E           | CCCCGATGAAGCGGGCGAGCGGGCC   | 1 | 103 | 103 | 1   | 100 Bm_ATCC23344_chr1     | 3510148 | 2043636 | 2043738 | 100 | 515 | 1.20E-18 - |
| BPSL1092  | hypothetical protein BPSL1092                           | 1262588 | 1262827 + | 79  | 53718727 | 3093822 -     | NULL               | CGCCAGGGAGTTCGCAACAATATA    | 1 | 103 | 103 | 1   | 100 Bm_ATCC23344_chr1     | 3510148 | 2042515 | 2042617 | 100 | 515 | 1.20E-18 - |
| BPSL1094  | hypothetical protein BPSL1094                           | 1264502 | 1264936 - | 144 | 53718729 | 3093488 -     | COG2764S           | CGCTCTTACAGATCCCGCTCACTG    | 1 | 103 | 1   | 103 | 100 Bm_ATCC23344_chr1     | 3510148 | 2040071 | 2040173 | 100 | 515 | 1.20E-18 + |
| BPSL1095  | transaldolase                                           | 1265301 | 1266254 - | 317 | 53718730 | 3094101 talB  | NULL               | CGCGCGAGCGCGCGCGCGCGGCTC    | 1 | 103 | 1   | 103 | 100 Bm_ATCC23344_chr1     | 3510148 | 2038752 | 2038854 | 100 | 515 | 1.20E-18 + |
| BPSL1097  | hypothetical protein BPSL1097                           | 1267966 | 1269141 - | 391 | 53718732 | 3092613 -     | COG3825S           | CGCCCGAGCGCGCGCGCGTGGCG     | 1 | 103 | 1   | 103 | 100 Bm_ATCC23344_chr1     | 3510148 | 2035874 | 2035976 | 99  | 506 | 3.00E-18 + |
| BPSL1098  | hypothetical protein BPSL1098                           | 1269354 | 1270196 - | 280 | 53718733 | 3091862 -     | COG0714R           | CGCCGCGCTCGCGAGACGCGGCG     | 1 | 103 | 1   | 103 | 100 Bm_ATCC23344_chr1     | 3510148 | 2034819 | 2034921 | 100 | 515 | 1.20E-18 + |
| BPSL1099  | putative cytochrome C precursor-related protein         | 1270430 | 1270789 + | 119 | 53718734 | 3091863 -     | COG2863C           | TGGCGGTTTTTTTGGCTGCTGTGG    | 1 | 103 | 103 | 1   | 100 Bm_ATCC23344_chr1     | 3510148 | 2034683 | 2034785 | 100 | 515 | 1.20E-18 - |
| BPSL1101  | hypothetical protein BPSL1101                           | 1271697 | 1272248 - | 183 | 53718736 | 3094149 -     | NULL               | CGCGCCGAGCGCGCGCGCGCGCG     | 1 | 103 | 1   | 103 | 100 Bm_ATCC23344_chr1     | 3510148 | 2031461 | 2031563 | 100 | 515 | 1.20E-18 + |
| BPSL1102  | hypothetical protein BPSL1102                           | 1272686 | 1273756 + | 356 | 53718737 | 3091536 -     | NULL               | CGGGGGCGCGCGCGGGCTGCAAA     | 1 | 103 | 103 | 1   | 100 Bm_ATCC23344_chr1     | 3510148 | 2031121 | 2031223 | 98  | 497 | 7.60E-18 - |
| BPSL1104  | ferredoxin                                              | 1274538 | 1275410 - | 290 | 53718739 | 3091537 -     | COG2878C           | TGCGAAAAATCGGCGCAATATTGTT   | 1 | 103 | 1   | 103 | 100 Bm_ATCC23344_chr1     | 3510148 | 2028299 | 2028401 | 100 | 515 | 1.20E-18 + |
| BPSL1105  | putative TetR family regulatory protein                 | 1275668 | 1276300 + | 210 | 53718740 | 3093813 -     | COG1309K           | GGTGTCCCTTAACGATGGCGCGCC    | 1 | 103 | 103 | 1   | 100 Bm_ATCC23344_chr1     | 3510148 | 2028139 | 2028241 | 100 | 515 | 1.20E-18 - |
| BPSL1106  | putative depolymerase/histone-like protein              | 1276435 | 1277901 - | 488 | 53718741 | 3093814 -     | COG4553I           | ATTGATTTTACCGCCCCGAATCGGC   | 1 | 103 | 1   | 103 | 100 Bm_ATCC23344_chr1     | 3510148 | 2025800 | 2025902 | 100 | 515 | 1.20E-18 + |
| BPSL1107  | hypothetical protein BPSL1107                           | 1278121 | 1279953 - | 610 | 53718742 | 3091503 -     | COG3387G           | CGCCGCTCCGCGGAGTATACGGGCG   | 1 | 103 | 1   | 103 | 100 Bm_ATCC23344_chr1     | 3510148 | 2023748 | 2023850 | 100 | 515 | 1.20E-18 + |
| BPSL1108  | hypothetical protein BPSL1108                           | 1280130 | 1281365 + | 411 | 53718743 | 3091504 -     | COG2706G           | GGCCGCTATATCTCGGCGGACGGCG   | 1 | 103 | 103 | 1   | 100 Bm_ATCC23344_chr1     | 3510148 | 2023669 | 2023771 | 100 | 515 | 1.20E-18 - |
| BPSL1112  | putative lipoprotein                                    | 1290012 | 1290233 + | 73  | 53718747 | 3092291 -     | NULL               | AGTGCTGACGAGTGTGACGTGTGTG   | 1 | 103 | 103 | 2   | 99 Bm_ATCC23344_chr1      | 3510148 | 2014131 | 2014232 | 98  | 492 | 1.30E-17 - |
| BPSL1113  | hypothetical protein BPSL1113                           | 1290292 | 1290678 + | 128 | 53718748 | 3092292 -     | COG3895R           | TGGCGCGCGCGCGGTTTGGCGCGC    | 1 | 61  | 61  | 1   | 100 Bm_ATCC23344_chr1     | 35      |         |         |     |     |            |

|          |                                                     |         |           |     |          |              |            |                           |   |     |     |     |                       |         |         |         |     |     |            |
|----------|-----------------------------------------------------|---------|-----------|-----|----------|--------------|------------|---------------------------|---|-----|-----|-----|-----------------------|---------|---------|---------|-----|-----|------------|
| BPSL1164 | phosphoribosylamine--glycine ligase                 | 1342594 | 1343871 - | 425 | 53718800 | 3094818 purD | COG0151F   | GCCGCCCTTTCCGCGCAAGGACGG  | 1 | 103 | 1   | 103 | 100 Bm_ATCC23344_chr1 | 3510148 | 1975461 | 1975563 | 100 | 515 | 1.20E-18 + |
| BPSL1165 | hypothetical protein BPSL1165                       | 1343982 | 1344710 - | 242 | 53718801 | 3093513 -    | NULL       | GGCCCAAGCGGGCACTCGCCCGCTC | 1 | 103 | 1   | 103 | 100 Bm_ATCC23344_chr1 | 3510148 | 1974622 | 1974724 | 100 | 515 | 1.20E-18 + |
| BPSL1166 | uracil phosphoribosyltransferase                    | 1345220 | 1345870 - | 216 | 53718802 | 3091557 upp  | COG0035F   | CGGATCGCGCGCGCCCACTTTCG   | 1 | 103 | 1   | 103 | 100 Bm_ATCC23344_chr1 | 3510148 | 1973477 | 1973579 | 100 | 515 | 1.20E-18 + |
| BPSL1167 | putative dehydrogenase                              | 1346128 | 1346907 + | 259 | 53718803 | 3093514 -    | COG1028IQR | CAGCGCGCGGGGGCGCGGCAACI   | 1 | 103 | 103 | 1   | 100 Bm_ATCC23344_chr1 | 3510148 | 1973317 | 1973419 | 100 | 515 | 1.20E-18 - |
| BPSL1170 | hypothetical protein BPSL1170                       | 1349820 | 1349912 + | 30  | 53718806 | 3093535 -    | NULL       | ATGCGGTTTACATAGGCGGTCTCG  | 1 | 103 | 103 | 1   | 100 Bm_ATCC23344_chr1 | 3510148 | 1969646 | 1969748 | 100 | 515 | 1.20E-18 - |
| BPSL1172 | potassium-transporting ATPase b chain               | 1351813 | 1353873 + | 686 | 53718808 | 3092345 kdpB | COG2216P   | CGCGGCATCAGCAGACAGAGAGGAC | 1 | 98  | 98  | 1   | 100 Bm_ATCC23344_chr1 | 3510148 | 1967653 | 1967750 | 100 | 490 | 1.60E-17 - |
| BPSL1174 | two-component system, sensor kinase protein KdpD    | 1345752 | 1377733 + | 993 | 53718810 | 3094181 kdpD | COG2205T   | CTCGAACCGCGGACGGCGGCGCTG  | 1 | 103 | 103 | 1   | 100 Bm_ATCC23344_chr1 | 3510148 | 1964713 | 1964815 | 99  | 506 | 3.00E-18 - |
| BPSL1176 | hypothetical protein BPSL1176                       | 1358812 | 1359108 + | 98  | 53718812 | 3093536 -    | COG3042R   | CTCCGGGCGCGCCCGACGACTTT   | 1 | 103 | 103 | 1   | 100 Bm_ATCC23344_chr1 | 3510148 | 1960661 | 1960763 | 99  | 506 | 3.00E-18 - |
| BPSL1177 | putative chaperone                                  | 1359324 | 1359644 + | 106 | 53718813 | 3092893 sugE | COG2076P   | AGGCTGTAAGCGTGTGTATACTT   | 1 | 103 | 103 | 1   | 100 Bm_ATCC23344_chr1 | 3510148 | 1960149 | 1960251 | 100 | 515 | 1.20E-18 - |
| BPSL1178 | hypothetical protein BPSL1178                       | 1359836 | 1360453 + | 205 | 53718814 | 3094526 -    | NULL       | CGCGCGTGAATCGCGGGCGGCGG   | 1 | 103 | 103 | 1   | 100 Bm_ATCC23344_chr1 | 3510148 | 1959637 | 1959739 | 98  | 497 | 7.60E-18 - |
| BPSL1180 | putative globin                                     | 1363156 | 1363602 + | 148 | 53718816 | 3093896 -    | NULL       | AGCGCGCGCAACGGGTATCTCGGI  | 1 | 66  | 66  | 1   | 100 Bm_ATCC23344_chr1 | 3510148 | 1956390 | 1956455 | 100 | 330 | 2.60E-10 - |
| BPSL1181 | putative alanyl-tRNA synthetase                     | 1363713 | 1364444 + | 243 | 53718817 | 3093897 -    | COG2872R   | CGCTTCGGGGGCTCGCGTGCCAA   | 1 | 103 | 103 | 1   | 100 Bm_ATCC23344_chr1 | 3510148 | 1955833 | 1955935 | 99  | 506 | 3.00E-18 - |
| BPSL1183 | amidase                                             | 1365426 | 1366820 + | 464 | 53718819 | 3094688 -    | NULL       | CGCGCCCGCTTTTTCGTGTCTATC  | 1 | 103 | 103 | 1   | 100 Bm_ATCC23344_chr1 | 3510148 | 1954120 | 1954222 | 100 | 515 | 1.20E-18 - |
| BPSL1185 | hypothetical protein BPSL1185                       | 1368695 | 1370602 - | 635 | 53718821 | 3092923 -    | COG1807M   | GACTTCGGGCGCAAGCGCGCACCT  | 1 | 103 | 1   | 103 | 100 Bm_ATCC23344_chr1 | 3510148 | 1947512 | 1947614 | 100 | 515 | 1.20E-18 + |
| BPSL1186 | glucose-1-dehydrogenase                             | 1371117 | 1371932 - | 271 | 53718822 | 3093594 -    | COG1028IQR | CCCGCGCGGGCGGTTTTTCGCGCG  | 1 | 103 | 1   | 103 | 100 Bm_ATCC23344_chr1 | 3510148 | 1946182 | 1946284 | 98  | 497 | 7.60E-18 + |
| BPSL1188 | putative TetR-family transcriptional regulator      | 1372891 | 1373610 - | 239 | 53718824 | 3092213 -    | COG1309K   | ATCGCGCGACAGCCTTCAAAACAG  | 1 | 103 | 1   | 103 | 100 Bm_ATCC23344_chr1 | 3510148 | 1944518 | 1944620 | 99  | 506 | 3.00E-18 + |
| BPSL1189 | putative kinase                                     | 1373847 | 1374317 - | 156 | 53718825 | 3092214 -    | NULL       | AACCAGCCATCGCGCGGAAGCGC   | 1 | 86  | 1   | 86  | 100 Bm_ATCC23344_chr1 | 3510148 | 1943828 | 1943913 | 98  | 421 | 2.00E-14 + |
| BPSL1191 | hypothetical protein BPSL1191                       | 1375457 | 1376395 - | 312 | 53718827 | 3093909 -    | COG2908S   | TTCCCCGTAAATAAGACGTCTCGTG | 1 | 93  | 1   | 93  | 100 Bm_ATCC23344_chr1 | 3510148 | 1941743 | 1941835 | 100 | 465 | 2.10E-16 + |
| BPSL1195 | RNA polymerase sigma-70 factor                      | 1378207 | 1378767 - | 186 | 53718831 | 3093318 -    | COG1595K   | ACAGGATGCCCGCGCGGGCGGAAA  | 1 | 103 | 1   | 103 | 100 Bm_ATCC23344_chr1 | 3510148 | 1939361 | 1939463 | 100 | 515 | 1.20E-18 + |
| BPSL1196 | acetolactate synthase III large subunit             | 1379163 | 1380926 + | 587 | 53718832 | 3093947 iHl  | COG0028EH  | TGAAGCCCGCCTTCAACTGGACGC  | 1 | 103 | 103 | 1   | 100 Bm_ATCC23344_chr1 | 3510148 | 1939063 | 1939165 | 100 | 515 | 1.20E-18 - |
| BPSL1197 | acetolactate synthase III small subunit             | 1381038 | 1381529 + | 163 | 53718833 | 3094328 iHv  | COG0404E   | GCTCGAAGCCCGCGGCGCGCGCT   | 1 | 103 | 103 | 1   | 100 Bm_ATCC23344_chr1 | 3510148 | 1937188 | 1937290 | 100 | 515 | 1.20E-18 - |
| BPSL1198 | ketol-acid reductoisomerase                         | 1381612 | 1382628 + | 338 | 53718834 | 3092052 iHvC | COG0059EH  | CGCCGCCGCGACCAACGCGCGCG   | 1 | 85  | 85  | 1   | 100 Bm_ATCC23344_chr1 | 3510148 | 1936614 | 1936698 | 100 | 425 | 1.40E-14 - |
| BPSL1199 | phosphatidylserine decarboxylase                    | 1382750 | 1383400 + | 216 | 53718835 | 3093663 -    | COG0688I   | CTCGAATCGAGGTCCGGCATCAAA  | 1 | 103 | 103 | 1   | 100 Bm_ATCC23344_chr1 | 3510148 | 1935476 | 1935578 | 100 | 515 | 1.20E-18 - |
| BPSL1201 | 2-isopropylmalate synthase                          | 1384648 | 1386195 + | 515 | 53718837 | 3091966 leuA | COG0119E   | CGCTTTTCGCGCTTCGTGAGCTTT  | 1 | 103 | 103 | 1   | 100 Bm_ATCC23344_chr1 | 3510148 | 1933578 | 1933680 | 100 | 515 | 1.20E-18 - |
| BPSL1202 | putative transport-related membrane protein         | 1386330 | 1387877 - | 515 | 53718838 | 3093654 -    | COG0659P   | CGCGGGCGCGCGGCACATCGCAC   | 1 | 60  | 1   | 60  | 100 Bm_ATCC23344_chr1 | 3510148 | 1929051 | 1929109 | 98  | 285 | 2.80E-08 + |
| BPSL1203 | putative carbonic anhydrase                         | 1387935 | 1388570 - | 211 | 53718839 | 3093655 -    | NULL       | CTAATACACTACACAAACACTTTT  | 1 | 103 | 1   | 103 | 100 Bm_ATCC23344_chr1 | 3510148 | 1928315 | 1928417 | 100 | 515 | 1.20E-18 + |
| BPSL1204 | putative lipoprotein                                | 1389014 | 1389514 - | 166 | 53718840 | 3092299 -    | NULL       | CGGCATATGAATCGCGCGCGCAA   | 1 | 103 | 1   | 103 | 100 Bm_ATCC23344_chr1 | 3510148 | 1927370 | 1927472 | 99  | 506 | 3.00E-18 + |
| BPSL1205 | putative amino acid transport system, exported prot | 1389893 | 1391170 - | 425 | 53718841 | 3092300 -    | COG0683E   | GGCGGAGGTGTCCGCGGCGCGCG   | 1 | 103 | 103 | 1   | 100 Bm_ATCC23344_chr1 | 3510148 | 1927093 | 1927195 | 100 | 515 | 1.20E-18 - |
| BPSL1206 | 30S ribosomal protein S15                           | 1391276 | 1391545 + | 89  | 53718842 | 3093559 rpsO | NULL       | GGGTTCCGGGCGGGGCGACTTGT   | 1 | 103 | 103 | 1   | 100 Bm_ATCC23344_chr1 | 3510148 | 1925710 | 1925812 | 100 | 515 | 1.20E-18 - |
| BPSL1207 | polyribonucleotide nucleotidyltransferase           | 1391849 | 1393990 + | 713 | 53718843 | 3092633 prp  | COG1185J   | GCATAAAAAACAACCTCTTCCCAT  | 1 | 103 | 103 | 1   | 100 Bm_ATCC23344_chr1 | 3510148 | 1925137 | 1925239 | 100 | 515 | 1.20E-18 - |
| BPSL1208 | putative oxidoreductase                             | 1394106 | 1395125 + | 339 | 53718844 | 3091522 -    | COG0604CR  | CGCGCAGCGCGAATCGCGCGCGCG  | 1 | 103 | 103 | 1   | 100 Bm_ATCC23344_chr1 | 3510148 | 1922880 | 1922982 | 100 | 515 | 1.20E-18 - |
| BPSL1209 | triosephosphate isomerase                           | 1395230 | 1395985 + | 251 | 53718845 | 3092857 tpiA | COG0149G   | GGTGCTTTGACCGGTTCTTCCAGCT | 1 | 103 | 103 | 1   | 100 Bm_ATCC23344_chr1 | 3510148 | 1921756 | 1921858 | 99  | 506 | 3.00E-18 - |
| BPSL1210 | protein-export membrane protein                     | 1396065 | 1396442 + | 125 | 53718846 | 3093077 secG | COG1314U   | GGCTTCGCGAGACGCGCGGACGAGA | 1 | 82  | 82  | 1   | 100 Bm_ATCC23344_chr1 | 3510148 | 1920921 | 1921002 | 100 | 410 | 6.40E-14 - |
| BPSL1211 | NADH dehydrogenase alpha subunit                    | 1396791 | 1397150 + | 119 | 53718847 | 3094307 nuoA | COG0838C   | CTTTGCGTCACTGTTGGGTTCTCAG | 1 | 103 | 103 | 1   | 100 Bm_ATCC23344_chr1 | 3510148 | 1920195 | 1920297 | 100 | 515 | 1.20E-18 - |
| BPSL1215 | ATP synthase subunit E                              | 1399748 | 1400233 + | 161 | 53718851 | 3091523 -    | COG1905C   | CGCGCTCGCAACAACGTTGCTAAAC | 1 | 103 | 103 | 1   | 100 Bm_ATCC23344_chr1 | 3510148 | 1917238 | 1917340 | 100 | 515 | 1.20E-18 - |
| BPSL1217 | NADH dehydrogenase gamma subunit                    | 1401623 | 1403953 + | 776 | 53718853 | 3091552 -    | COG1034C   | CGGCGCAACCCGATTGACAGATTAC | 1 | 85  | 85  | 1   | 100 Bm_ATCC23344_chr1 | 3510148 | 1915363 | 1915447 | 100 | 425 | 1.40E-14 - |
| BPSL1220 | NADH dehydrogenase subunit J                        | 1405632 | 1406288 + | 218 | 53718856 | 3091498 nuoJ | COG0839C   | CGGCGCGCGGACGCGCGCGCAAC   | 1 | 103 | 103 | 1   | 100 Bm_ATCC23344_chr1 | 3510148 | 1911354 | 1911456 | 100 | 515 | 1.20E-18 - |
| BPSL1227 | hypothetical protein BPSL1227                       | 1412756 | 1413178 + | 140 | 53718863 | 3092015 -    | COG5319S   | ACGGTCGCGCGATCGGGGTCTTC   | 1 | 103 | 103 | 1   | 100 Bm_ATCC23344_chr1 | 3510148 | 1904230 | 1904332 | 100 | 515 | 1.20E-18 - |
| BPSL1228 | putative acyl-CoA dehydrogenase family protein      | 1413239 | 1414435 + | 398 | 53718864 | 3092016 -    | COG1960I   | TGCGCCGCTGATCGCTGCGGCGGCT | 1 | 63  | 63  | 1   | 100 Bm_ATCC23344_chr1 | 3510148 | 1903747 | 1903809 | 100 | 315 | 1.30E-09 - |
| BPSL1233 | putative lipoprotein                                | 1416651 | 1417913 + | 420 | 53718868 | 3091611 -    | NULL       | TGAGCGGTTCTCGCGCGCATCGCT  | 1 | 98  | 98  | 1   | 100 Bm_ATCC23344_chr1 | 3510148 | 1900335 | 1900432 | 100 | 490 | 1.60E-17 - |
| BPSL1237 | enoyl-CoA hydratase                                 | 1421317 | 1422180 - | 287 | 53718872 | 3093130 -    | COG1024I   | AAAGCACGTTTCATGTAGTCTAAG  | 1 | 103 | 1   | 103 | 100 Bm_ATCC23344_chr1 | 3510148 | 1894704 | 1894806 | 100 | 515 | 1.20E-18 + |
| BPSL1238 | putative glutathione S-transferase related protein  | 1422330 | 1423004 + | 224 | 53718873 | 3093261 -    | COG0625O   | GAGCGTCGCGAGCGCGCTTCAAGT  | 1 | 103 | 103 | 1   | 100 Bm_ATCC23344_chr1 | 3510148 | 1894652 | 1894754 | 100 | 515 | 1.20E-18 - |
| BPSL1239 | putative aminotransferase                           | 1423224 | 1424378 - | 384 | 53718874 | 3093262 -    | COG0436E   | CGACACGACTCGCCCGAGCGCCGC  | 1 | 69  | 1   | 69  | 100 Bm_ATCC23344_chr1 | 3510148 | 1895259 | 1895297 | 98  | 336 | 1.40E-10 + |
| BPSL1240 | hypothetical protein BPSL1240                       | 1424445 | 1425113 - | 222 | 53718875 | 3094810 -    | COG1569R   | AGAGGCTCGCGGCGACGCGGTGCC  | 1 | 60  | 1   | 60  | 100 Bm_ATCC23344_chr1 | 3510148 | 1891803 | 1891862 | 100 | 300 | 6.00E-09 + |
| BPSL1241 | hypothetical protein BPSL1241                       | 1425171 | 1425953 + | 260 | 53718876 | 3094811 -    | COG3022S   | TCGTTACATCGGTGGTITTCGTCTC | 1 | 60  | 60  | 1   | 100 Bm_ATCC23344_chr1 | 3510148 | 1891800 | 1891859 | 100 | 300 | 6.00E-09 - |
| BPSL1242 | family M14 unassigned peptidase                     | 1426012 | 1427166 + | 384 | 53718877 | 3091880 -    | COG2866E   | ATAGCGCGCTATCGCGGTATTCGG  | 1 | 61  | 61  | 1   | 100 Bm_ATCC23344_chr1 | 3510148 | 1890959 | 1891019 | 100 | 305 | 3.60E-09 - |
| BPSL1243 | hypothetical protein BPSL1243                       | 1427377 | 1428036 - | 219 | 53718878 | 3091881 -    | NULL       | GCGCCATCGTACGCGCGCGCGACG  | 1 | 103 | 1   | 103 | 100 Bm_ATCC23344_chr1 | 3510148 | 1888837 | 1888939 | 100 | 515 | 1.20E-18 + |
| BPSL1244 | hypothetical protein BPSL1244                       | 1428157 | 1428831 - | 224 | 53718879 | 3093058 -    | COG3235S   | CCGGTAAAAACCGCGTAGAGGGTG  | 1 | 69  | 1   | 69  | 100 Bm_ATCC23344_chr1 | 3510148 | 1888076 | 1888144 | 100 | 345 | 5.50E-11 + |
| BPSL1245 | putative transcriptional regulator                  | 1428898 | 1429806 - | 302 | 53718880 | 3093059 -    | COG2197TK  | GCACCGCGCGAAGCGCGCTCGAAG  | 1 | 103 | 1   | 103 | 100 Bm_ATCC23344_chr1 | 3510148 | 1887067 | 1887169 | 99  | 506 | 3.00E-18 + |
| BPSL1270 | putative exported alkaline phosphatase              | 1472111 | 1474072 - | 653 | 53718905 | 3091945 -    | COG3211R   | TTTCATTACAAAACTAAACTTTCA  | 1 | 103 | 1   | 103 | 100 Bm_ATCC23344_chr1 | 3510148 | 1878539 | 1878641 | 100 | 515 | 1.20E-18 - |
| BPSL1271 | hypothetical protein BPSL1271                       | 1474323 | 1474844 + | 173 | 53718906 | 3093525 -    | NULL       | CGCGCGCCGTTTTTTCCGGCGGAAT | 1 | 103 | 103 | 1   | 100 Bm_ATCC23344_chr1 | 3510148 | 1878386 | 1878488 | 99  | 506 | 3.00E-18 - |
| BPSL1272 | hypothetical protein BPSL1272                       | 1474934 | 1475395 + | 153 | 53718907 | 3093526 -    | COG1959K   | ATCCGCTTGCAATCCCGGCTAAATG | 1 | 92  | 92  | 1   | 100 Bm_ATCC23344_chr1 | 3510148 | 1877775 | 1877866 | 100 | 460 | 3.50E-16 + |
| BPSL1273 | hypothetical protein BPSL1273                       | 1475662 | 1476288 + | 208 | 53718908 | 3093841 -    | COG2910R   | GACTATGATGGGATCTGGATCC    | 1 | 103 | 103 | 1   | 100 Bm_ATCC23344_chr1 | 3510148 | 1877047 | 1877149 | 99  | 506 | 3.00E-18 - |
| BPSL1274 | hypothetical protein BPSL1274                       | 1477083 | 1477739 - | 218 | 53718909 | 3093842 -    | COG5553R   | ATGAGGGAAACAATATGGAATCCGT | 1 | 103 | 1   | 103 |                       |         |         |         |     |     |            |

|           |                                                      |         |           |      |          |               |            |                               |   |           |     |     |                       |         |         |         |     |     |            |
|-----------|------------------------------------------------------|---------|-----------|------|----------|---------------|------------|-------------------------------|---|-----------|-----|-----|-----------------------|---------|---------|---------|-----|-----|------------|
| BPSL1310  | putative GntR-family regulatory protein              | 1528813 | 1530354 + | 513  | 53718948 | 3094229 -     | COG1167KE  | CGTTCGCGCGGCGCATCGGGATTG/     | 1 | 103       | 103 | 1   | 100 Bm_ATCC23344_chr1 | 3510148 | 3159277 | 3159379 | 100 | 515 | 1.20E-18 - |
| BPSL1311  | putative AsnC-family regulatory protein              | 1530602 | 1531096 - | 164  | 53718949 | 3094230 -     | COG1522K   | AATGGAAATTTAAATTTCAAAAAATATTC | 1 | 103       | 1   | 103 | 100 Bm_ATCC23344_chr1 | 3510148 | 3156938 | 3157040 | 99  | 506 | 3.00E-18 + |
| BPSL1312  | glucosamine--fructose-6-phosphate aminotransferas    | 1531255 | 1533156 + | 633  | 53718950 | 3091988 glm52 | COG0449M   | GGAAATTTTCAGGAATCGATATATTT    | 1 | 103       | 103 | 1   | 100 Bm_ATCC23344_chr1 | 3510148 | 3156877 | 3156979 | 100 | 515 | 1.20E-18 - |
| BPSL1314  | hypothetical protein BPSL1314                        | 1534719 | 1535423 - | 234  | 53718952 | 3093745 -     | COG3644S   | GCCGCGGCGGCGACGTCAAGCAAA      | 1 | 103       | 1   | 103 | 100 Bm_ATCC23344_chr1 | 3510148 | 3152592 | 3152694 | 99  | 506 | 3.00E-18 + |
| BPSL1315  | putative LysR-family transcriptional regulator       | 1535587 | 1536486 - | 299  | 53718953 | 3091704 -     | COG0583K   | GCCGCGATGACTTCGGCTTGGCTGCC    | 1 | 103       | 1   | 103 | 100 Bm_ATCC23344_chr1 | 3510148 | 3151529 | 3151631 | 100 | 515 | 1.20E-18 + |
| BPSL1316  | short chain dehydrogenase                            | 1536737 | 1537507 - | 256  | 53718954 | 3091705 -     | COG1028IQR | TGTCAGAAACAGGTGACTTTATAAAGG   | 1 | 103       | 103 | 1   | 100 Bm_ATCC23344_chr1 | 3510148 | 3151376 | 3151478 | 100 | 515 | 1.20E-18 - |
| BPSL1319  | putative nitrite/sulfite reductase                   | 1539904 | 1541721 - | 605  | 53718957 | 3094334 -     | COG0155P   | GCCGCGCGCCCTACGCTTGGTGATC     | 1 | 103       | 1   | 103 | 100 Bm_ATCC23344_chr1 | 3510148 | 3146257 | 3146359 | 100 | 515 | 1.20E-18 + |
| BPSL1321  | putative GntR-family transcriptional regulator       | 1542534 | 1544009 - | 491  | 53718959 | 3094070 -     | COG1167KE  | GGCGTCGCTCTCGCGATCGCGCGGCT    | 1 | 103       | 1   | 103 | 100 Bm_ATCC23344_chr1 | 3510148 | 3143993 | 3144095 | 98  | 497 | 7.60E-18 + |
| BPSL1323  | putative heat shock protein                          | 1545147 | 1545584 - | 145  | 53718961 | 3094350 -     | COG0071O   | TGCGGTTTTCGACCGATTGTTCGCGC    | 1 | 103       | 1   | 103 | 100 Bm_ATCC23344_chr1 | 3510148 | 3142418 | 3142520 | 100 | 515 | 1.20E-18 + |
| BPSL1323a | hypothetical protein BPSL1323a                       | 1545977 | 1546300 + | 107  | 53718962 | 3094351 -     | NULL       | ATCGGAGCCGTGTGCGCGAAGCGC      | 1 | 103       | 103 | 1   | 100 Bm_ATCC23344_chr1 | 3510148 | 3142126 | 3142225 | 96  | 461 | 3.20E-16 - |
| BPSL1324  | phosphoenolpyruvate carboxykinase (GTP)              | 1547220 | 1549085 - | 621  | 53718963 | 3093468 pckG  | COG1274C   | CGCTGCCCCCAAGCATCGCGTAGT      | 1 | 103       | 103 | 1   | 100 Bm_ATCC23344_chr1 | 3510148 | 3140876 | 3140978 | 100 | 515 | 1.20E-18 + |
| BPSL1325  | putative 3-hydroxyacyl-CoA dehydrogenase             | 1549366 | 1550298 + | 310  | 53718964 | 3094011 -     | COG1250I   | TGCGCGGCGCGCGCGCGCGTGC        | 1 | 103       | 103 | 2   | 99 Bm_ATCC23344_chr1  | 3510148 | 3138731 | 3138832 | 97  | 483 | 3.20E-17 - |
| BPSL1327  | putative malonate transport-related system membra    | 1551987 | 1552382 + | 131  | 53718966 | 3091661 -     | NULL       | ATTGCCGACGTACGCCCATCGCCGG     | 1 | 103       | 103 | 1   | 100 Bm_ATCC23344_chr1 | 3510148 | 3136109 | 3136211 | 100 | 515 | 1.20E-18 - |
| BPSL1329  | putative malonate decarboxylase alpha-subunit        | 1553456 | 1555102 + | 548  | 53718968 | 3094323 -     | COG4670I   | CGGCCACTGAGTGTGATCGCGCAAA     | 1 | 103       | 103 | 1   | 100 Bm_ATCC23344_chr1 | 3510148 | 3134613 | 3134715 | 100 | 515 | 1.20E-18 - |
| BPSL1337  | hypothetical protein BPSL1337                        | 1561322 | 1562236 + | 304  | 53718976 | 3094591 -     | COG4757R   | GACCGAAGAGGCGCGGCAAGTCTTG     | 1 | 103       | 103 | 1   | 100 Bm_ATCC23344_chr1 | 3510148 | 3126984 | 3127086 | 100 | 515 | 1.20E-18 - |
| BPSL1339  | putative proline/betaine transporter                 | 1563720 | 1565207 - | 495  | 53718978 | 3094767 -     | NULL       | CGCGACCGGACCCCTGTCCGATCGCG    | 1 | 103       | 103 | 1   | 100 Bm_ATCC23344_chr1 | 3510148 | 791674  | 791776  | 100 | 515 | 1.20E-18 - |
| BPSL1340  | hypothetical protein BPSL1340                        | 1565742 | 1566074 + | 110  | 53718979 | 3094768 -     | NULL       | GTGATGGGCGCGTGTGGCGGGCGGT     | 1 | 103       | 1   | 103 | 100 Bm_ATCC23344_chr1 | 3510148 | 792111  | 792213  | 98  | 497 | 1.60E-18 + |
| BPSL1341  | DNA polymerase III subunit epsilon                   | 1566419 | 1576141 - | 240  | 53718980 | 3092205 dnaQ  | COG0847L   | GCCCGCTCGCGCCCCCTTTGCCCT      | 1 | 60        | 60  | 1   | 100 Bm_ATCC23344_chr1 | 3510148 | 793696  | 793755  | 100 | 300 | 6.00E-09 - |
| BPSL1345  | putative exported transglycosylase protein           | 1569365 | 1571026 + | 553  | 53718984 | 3091560 -     | COG0741M   | GCCCGTGCAATAGTCGGCAAGCTC      | 1 | 86        | 1   | 86  | 100 Bm_ATCC23344_chr1 | 3510148 | 795839  | 795924  | 98  | 421 | 7.00E-14 + |
| BPSL1346  | hypothetical protein BPSL1346                        | 1571107 | 1572399 + | 430  | 53718985 | 3091561 -     | NULL       | GACGAAAGGGCGCGCATCGCGCGC      | 1 | 83        | 1   | 83  | 100 Bm_ATCC23344_chr1 | 3510148 | 797584  | 797666  | 100 | 415 | 3.80E-14 + |
| BPSL1349  | carbamoyl-phosphate synthase small subunit           | 1575304 | 1576449 + | 381  | 53718988 | 3092517 carA  | COG0505EF  | CGCGCGAAAGCGCCCAAGCGCGCC      | 1 | 103       | 1   | 103 | 100 Bm_ATCC23344_chr1 | 3510148 | 801772  | 801874  | 100 | 515 | 1.20E-18 + |
| BPSL1351  | carbamoyl-phosphate synthase large subunit           | 1577195 | 1580449 + | 1084 | 53718990 | 3092518 carB  | COG0458EF  | GCGCGCCCGCGGGATCGCGCATCA      | 1 | 54        | 1   | 54  | 100 Bm_ATCC23344_chr1 | 3510148 | 803712  | 803765  | 98  | 261 | 3.40E-07 + |
| BPSL1352  | transcription elongation factor GreA                 | 1580568 | 1581044 + | 158  | 53718991 | 3093169 greA  | COG0782K   | AAGCAACACGTGCGCGGATTAAGC      | 1 | 103       | 1   | 103 | 100 Bm_ATCC23344_chr1 | 3510148 | 807036  | 807138  | 100 | 515 | 1.20E-18 - |
| BPSL1354  | hypothetical protein BPSL1354                        | 1581618 | 1582172 - | 184  | 53718993 | 3092734 -     | NULL       | CAGCCCGCGATTTTACGTGGTTCG      | 1 | 103       | 103 | 1   | 100 Bm_ATCC23344_chr1 | 3510148 | 808738  | 808840  | 98  | 497 | 7.60E-18 - |
| BPSL1355  | putative ribosomal RNA large subunit methyltransfer  | 1582366 | 1583028 + | 220  | 53718994 | 3092735 -     | COG0293J   | CGGCTTGGGCGCCTTCGGGGCGCAA     | 1 | 103       | 1   | 103 | 100 Bm_ATCC23344_chr1 | 3510148 | 808834  | 808936  | 100 | 515 | 1.20E-18 + |
| BPSL1356  | FtsH endopeptidase                                   | 1583196 | 1585082 + | 628  | 53718995 | 3093403 ftsH  | COG0465J   | AGCGAATCCTTATGGCAGGGGGCTC     | 1 | 103       | 1   | 103 | 100 Bm_ATCC23344_chr1 | 3510148 | 809664  | 809766  | 100 | 515 | 1.20E-18 + |
| BPSL1357  | dihydropterate synthase                              | 1585195 | 1586085 + | 296  | 53718996 | 3092153 folP  | COG0294H   | TGGGTTTCACGGGCTGGTGTGGCTG     | 1 | 103       | 1   | 103 | 100 Bm_ATCC23344_chr1 | 3510148 | 811663  | 811765  | 100 | 515 | 1.20E-18 + |
| BPSL1365  | putative phosphate regulon two-component system      | 1593304 | 1594614 + | 436  | 53719004 | 3093459 -     | COG0642T   | GCGCCGCGCGCGCGCGGGGTTCC       | 1 | 72        | 1   | 72  | 100 Bm_ATCC23344_chr1 | 3510148 | 819803  | 819874  | 100 | 360 | 1.20E-11 + |
| BPSL1366  | polyphosphate kinase                                 | 1594813 | 1596873 - | 686  | 53719005 | 3093143 ppk   | NULL       | TTTGCGCAAAATCAAACTGTCA        | 1 | 103       | 103 | 1   | 100 Bm_ATCC23344_chr1 | 3510148 | 823441  | 823543  | 100 | 515 | 1.20E-18 - |
| BPSL1367  | putative exopolyphosphatase                          | 1597104 | 1598663 + | 519  | 53719006 | 3093460 -     | COG0248FP  | AAGCATCTCTAGATACAATGAAC       | 1 | 103       | 1   | 103 | 100 Bm_ATCC23344_chr1 | 3510148 | 823574  | 823676  | 99  | 506 | 3.00E-18 + |
| BPSL1368  | hypothetical protein BPSL1368                        | 1598976 | 1599869 - | 297  | 53719007 | 3094861 -     | NULL       | GATTCACTCTGAGGCGCGCGCGAC      | 1 | 68        | 68  | 1   | 100 Bm_ATCC23344_chr1 | 3510148 | 826437  | 826503  | 98  | 325 | 4.40E-10 - |
| BPSL1369  | hypothetical protein BPSL1369                        | 1599935 | 1601008 + | 357  | 53719008 | 3094862 -     | NULL       | GCGCAACCGCGGCAACATGCTCGG      | 1 | 68        | 1   | 68  | 100 Bm_ATCC23344_chr1 | 3510148 | 826440  | 826506  | 98  | 325 | 4.40E-10 - |
| BPSL1373  | hypothetical protein BPSL1373                        | 1603310 | 1603720 - | 136  | 53719012 | 3094436 -     | NULL       | TGCTCACATCTTTTGGGGGAAATGA     | 1 | 103       | 103 | 1   | 100 Bm_ATCC23344_chr1 | 3510148 | 830289  | 830392  | 98  | 496 | 8.40E-18 - |
| BPSL1374  | putative hydrolase                                   | 1604281 | 1604742 + | 153  | 53719013 | 3093970 -     | COG2062T   | CGCTTGACCGGGATCGCGCAACA       | 1 | 103       | 1   | 103 | 100 Bm_ATCC23344_chr1 | 3510148 | 830753  | 830855  | 100 | 515 | 1.20E-18 + |
| BPSL1375  | hypothetical protein BPSL1375                        | 1604894 | 1605712 + | 272  | 53719014 | 3093971 -     | COG3176R   | GACACGTACCGCGAATGACACCCGT     | 1 | 103       | 1   | 103 | 100 Bm_ATCC23344_chr1 | 3510148 | 831366  | 831468  | 100 | 515 | 1.20E-18 + |
| BPSL1376  | hypothetical protein BPSL1376                        | 1606063 | 1606326 + | 87   | 53719015 | 3094812 -     | NULL       | GGATTTCCTGGAGTATCGCGTGCA      | 1 | 77        | 77  | 1   | 100 Bm_ATCC23344_chr1 | 3510148 | 832896  | 832972  | 100 | 385 | 8.70E-13 - |
| BPSL1377  | putative lipoprotein                                 | 1606401 | 1606592 + | 63   | 53719016 | 3094813 -     | NULL       | CGATTTCCAGTAGTATCGCGCGGTC     | 1 | 77        | 1   | 77  | 100 Bm_ATCC23344_chr1 | 3510148 | 832899  | 832975  | 100 | 385 | 8.70E-13 + |
| BPSL1379  | hypothetical protein BPSL1379                        | 1608253 | 1608603 - | 116  | 53719018 | 3093286 -     | COG5626S   | GCCTCATCGGCTTCATCAAGTGCC      | 1 | 103       | 103 | 1   | 100 Bm_ATCC23344_chr1 | 3510148 | 835166  | 835268  | 100 | 515 | 1.20E-18 - |
| BPSL1381  | subfamily M23B unassigned peptidase                  | 1610849 | 1611562 - | 237  | 53719020 | 3093551 -     | COG0739M   | GCTTTCAGCGCGCTCGCGCGCCGCG     | 1 | 103       | 103 | 1   | 100 Bm_ATCC23344_chr1 | 3510148 | 838092  | 838194  | 99  | 506 | 3.00E-18 - |
| BPSL1382  | hypothetical protein BPSL1382                        | 1611847 | 1612755 - | 302  | 53719021 | 3094293 -     | COG2017G   | CGTCGCGGAGTCACTTCGCGGCA       | 1 | Not found |     |     |                       | 3510148 |         |         |     |     |            |
| BPSL1394  | putative exported endonuclease                       | 1620853 | 1621476 - | 207  | 53719030 | 3093959 -     | COG1502I   | CGCGCATGCGCGCTCGACAGGAAT      | 1 | 103       | 1   | 103 | 100 Bm_ATCC23344_chr1 | 3510148 | 1531185 | 1531287 | 100 | 515 | 1.20E-18 + |
| BPSL1397  | putative porin signal peptide protein                | 1624054 | 1625121 - | 355  | 53719033 | 3094565 -     | COG3203M   | CGCCGACCGTTCATCTGCATGGCTT     | 1 | 103       | 1   | 103 | 100 Bm_ATCC23344_chr1 | 3510148 | 1527540 | 1527642 | 100 | 515 | 1.20E-18 + |
| BPSL1398  | putative GcrE-family transcriptional regulator       | 1625452 | 1626600 + | 382  | 53719034 | 3094566 -     | COG2771K   | GCGCGGGCGGTTTCAAAAAAGAC       | 1 | 103       | 103 | 1   | 100 Bm_ATCC23344_chr1 | 3510148 | 1527307 | 1527409 | 100 | 515 | 1.20E-18 - |
| BPSL1399  | 2-dehydrodipantate 2-reductase                       | 1626699 | 1627685 + | 328  | 53719035 | 3093239 -     | COG1893H   | GCGCGGGTGCAGCGCGCGGATGCG      | 1 | 101       | 101 | 1   | 100 Bm_ATCC23344_chr1 | 3510148 | 1526060 | 1526160 | 100 | 505 | 3.30E-18 - |
| BPSL1400  | putative MarR-family transcriptional regulator       | 1628075 | 1628524 - | 149  | 53719036 | 3093240 -     | COG1846K   | GACCCCGCGCGCACGCGCGGAGCG      | 1 | 103       | 1   | 103 | 100 Bm_ATCC23344_chr1 | 3510148 | 1524151 | 1524253 | 100 | 515 | 1.20E-18 + |
| BPSL1401  | putative kinase                                      | 1628627 | 1629790 - | 387  | 53719037 | 3092186 -     | NULL       | TGCGCCCGCGCGACGCGTGGCGCG      | 1 | 103       | 1   | 103 | 100 Bm_ATCC23344_chr1 | 3510148 | 1522885 | 1522987 | 99  | 506 | 3.00E-18 + |
| BPSL1402  | trigger factor                                       | 1630243 | 1631592 + | 449  | 53719038 | 3092748 tig   | COG0544O   | CGCGTGAAGCGAGGCGCGGCGCGG      | 1 | 103       | 103 | 1   | 100 Bm_ATCC23344_chr1 | 3510148 | 1522530 | 1522632 | 100 | 515 | 1.20E-18 - |
| BPSL1403  | ATP-dependent Clp protease proteolytic subunit       | 1631727 | 1632380 + | 217  | 53719039 | 3094271 clpP  | COG0740OU  | ACGACGGCGCGGACGCGGTTTTTTC     | 1 | 103       | 103 | 1   | 100 Bm_ATCC23344_chr1 | 3510148 | 1521046 | 1521148 | 99  | 506 | 3.00E-18 - |
| BPSL1404  | ATP-dependent protease ATP-binding subunit           | 1632520 | 1633812 + | 430  | 53719040 | 3093205 clpX  | COG1219O   | CACACGCCCGGAGCATCTCGCGGCA     | 1 | 103       | 103 | 1   | 100 Bm_ATCC23344_chr1 | 3510148 | 1520253 | 1520355 | 99  | 506 | 3.00E-18 - |
| BPSL1405  | ATP-dependent protease                               | 1634008 | 1636425 + | 805  | 53719041 | 3092784 lon   | COG0466O   | GGTGACTTTTTTTACGAATATTTCCC    | 1 | 103       | 103 | 1   | 100 Bm_ATCC23344_chr1 | 3510148 | 1518765 | 1518867 | 100 | 515 | 1.20E-18 - |
| BPSL1410  | putative peptidyl-prolyl cis-trans isomerase         | 1640747 | 1642681 - | 644  | 53719046 | 3094072 -     | NULL       | CGTCCGCTTCGCGCATCATCCGAA      | 1 | 103       | 103 | 1   | 100 Bm_ATCC23344_chr1 | 3510148 | 1512102 | 1512204 | 100 | 515 | 1.20E-18 - |
| BPSL1413  | glucose-6-phosphate isomerase                        | 1644934 | 1646556 - | 540  | 53719049 | 3093521 pgi   | COG0166G   | GTTCGCGCGCGGAGCGGGGCTCTC      | 1 | 103       | 1   | 103 | 100 Bm_ATCC23344_chr1 | 3510148 | 1506291 | 1506393 | 100 | 515 | 1.20E-18 + |
| BPSL1415  | putative D-amino acid dehydrogenase small subunit    | 1648302 | 1649606 + | 434  | 53719051 | 3093732 -     | COG0665E   | TTTCATTTTGGGACATCATGCGCGC     | 1 | 103       | 1   | 103 | 100 Bm_ATCC23344_chr1 | 3510148 | 1503241 | 1503343 | 100 | 515 | 1.20E-18 + |
| BPSL1420  | putative intracellular septation transmembrane prote | 1655689 | 1656219 - | 176  | 53719056 | 3094013 -     | COG2917D   | GACCGGGCGCGCGGGAAGAGCCGG      | 1 | 95        | 1   | 95  | 100 Bm_ATCC23344_chr1 | 3510148 | 1496645 |         |     |     |            |

|          |                                                        |         |           |     |          |              |            |                             |   |     |     |     |                       |         |         |         |     |     |            |
|----------|--------------------------------------------------------|---------|-----------|-----|----------|--------------|------------|-----------------------------|---|-----|-----|-----|-----------------------|---------|---------|---------|-----|-----|------------|
| BPSL1447 | hypothetical protein BPSL1447                          | 1682926 | 1683216 - | 96  | 53719083 | 3091723 -    | NULL       | CGTTTCAGCGCCGATTGCGCAATAI   | 1 | 103 | 1   | 103 | 100 Bm_ATCC23344_chr1 | 3510148 | 1469643 | 1469745 | 100 | 515 | 1.20E-18 + |
| BPSL1448 | L-asparaginase II precursor                            | 1683714 | 1684757 + | 347 | 53719084 | 3092601 ansB | NULL       | GTCCGCCAACCGGGGGGAGCGGGC    | 1 | 103 | 103 | 1   | 100 Bm_ATCC23344_chr1 | 3510148 | 1469243 | 1469345 | 100 | 515 | 1.20E-18 - |
| BPSL1455 | hypothetical protein BPSL1455                          | 1691494 | 1692414 - | 306 | 53719091 | 3094551 -    | COG1409R   | GTTTATTCGCCGATCCGCGCAACCGG  | 1 | 103 | 1   | 103 | 100 Bm_ATCC23344_chr1 | 3510148 | 1464653 | 1464754 | 99  | 500 | 5.00E-18 - |
| BPSL1456 | RNA polymerase sigma-70 factor                         | 1692620 | 1693327 + | 235 | 53719092 | 3094552 -    | COG1595K   | CGACGGGCGGTAAAGATGCCTGAG    | 1 | 103 | 103 | 1   | 100 Bm_ATCC23344_chr1 | 3510148 | 1464545 | 1464647 | 100 | 515 | 1.20E-18 - |
| BPSL1458 | 30S ribosomal protein S6                               | 1694743 | 1695117 + | 124 | 53719094 | 3093548 rpsF | COG0360J   | TGAGCCCTTGATCGGACCCCATATAC  | 1 | 103 | 103 | 1   | 100 Bm_ATCC23344_chr1 | 3510148 | 1462588 | 1462690 | 98  | 497 | 7.60E-18 - |
| BPSL1462 | replicative DNA helicase                               | 1696355 | 1697737 + | 460 | 53719098 | 3093450 dnaB | COG0305L   | AGGGCAGGGGCTCGGGCAACCGGI    | 1 | 103 | 103 | 1   | 100 Bm_ATCC23344_chr1 | 3510148 | 1460976 | 1461078 | 100 | 515 | 1.20E-18 - |
| BPSL1463 | hypothetical protein BPSL1463                          | 1697876 | 1698502 + | 208 | 53719099 | 3094583 -    | COG1392P   | CGCTCGCCCTGTTGGCATCGGGCG    | 1 | 103 | 103 | 1   | 100 Bm_ATCC23344_chr1 | 3510148 | 1459455 | 1459557 | 100 | 515 | 1.20E-18 - |
| BPSL1466 | putative phosphorous metabolism-related protein        | 1701212 | 1702603 - | 463 | 53719102 | 3094545 -    | COG1875T   | CGCGCTCGTCGAAGACCGATCGGCG   | 1 | 103 | 1   | 103 | 100 Bm_ATCC23344_chr1 | 3510148 | 1454620 | 1454722 | 98  | 497 | 7.60E-18 + |
| BPSL1467 | putative bacterioferritin comigratory protein (detoxif | 1703337 | 1703798 - | 153 | 53719103 | 3094546 -    | COG1225O   | ACGAAAGCCGGTCCGGCGTTTCGCG   | 1 | 92  | 1   | 92  | 100 Bm_ATCC23344_chr1 | 3510148 | 1453436 | 1453527 | 100 | 460 | 3.50E-16 + |
| BPSL1472 | putative LPS biosynthesis-related protein              | 1707809 | 1708960 - | 383 | 53719106 | 3093574 -    | COG0399M   | CGGACCGACAAAAGATGACGTACCC   | 1 | 103 | 1   | 103 | 100 Bm_ATCC23344_chr1 | 3510148 | 1448262 | 1448364 | 99  | 506 | 3.00E-18 + |
| BPSL1474 | hypothetical protein BPSL1474                          | 1709479 | 1711185 - | 568 | 53719108 | 3092098 -    | COG1807M   | CGCCCCGCTTCGCGCCGCGCCCGC    | 1 | 103 | 1   | 103 | 100 Bm_ATCC23344_chr1 | 3510148 | 1446037 | 1446139 | 100 | 515 | 1.20E-18 - |
| BPSL1475 | hypothetical protein BPSL1475                          | 1711354 | 1711728 - | 124 | 53719109 | 3092099 -    | COG3737S   | GGCCGCGACGATCGCGGCGAGCGCG   | 1 | 103 | 1   | 103 | 100 Bm_ATCC23344_chr1 | 3510148 | 1445494 | 1445596 | 100 | 515 | 1.20E-18 + |
| BPSL1476 | aspartate aminotransferase                             | 1712067 | 1713305 + | 412 | 53719110 | 3092368 -    | COG0436E   | AGCCCGCATGAAGCCATCTCTAGAC/  | 1 | 103 | 103 | 1   | 100 Bm_ATCC23344_chr1 | 3510148 | 1445253 | 1445355 | 100 | 515 | 1.20E-18 - |
| BPSL1482 | hypothetical protein BPSL1482                          | 1719333 | 1719875 - | 180 | 53719116 | 3092369 -    | NULL       | AAGATGCAGACCGTCGACCATTTTA   | 1 | 103 | 1   | 103 | 100 Bm_ATCC23344_chr1 | 3510148 | 1437371 | 1437473 | 99  | 506 | 3.00E-18 + |
| BPSL1483 | putative DNA-binding protein                           | 1720059 | 1720556 + | 165 | 53719117 | 3093311 -    | COG1959K   | CTGACGGTCTGTCATCTTATGACGGC  | 1 | 103 | 103 | 1   | 100 Bm_ATCC23344_chr1 | 3510148 | 1437285 | 1437387 | 100 | 515 | 1.20E-18 - |
| BPSL1484 | ClpB heat-shock protein                                | 1720727 | 1723357 + | 876 | 53719118 | 3094211 clpB | COG0542O   | CCGCGTCCCGCTCTCGTTCGCGCCGC  | 1 | 103 | 103 | 1   | 100 Bm_ATCC23344_chr1 | 3510148 | 1436617 | 1436719 | 100 | 515 | 1.20E-18 - |
| BPSL1485 | hypothetical protein BPSL1485                          | 1723606 | 1724028 - | 140 | 53719119 | 3093312 -    | COG3753S   | CTGCGGGCGCGCGCGCGCGGGCGG    | 1 | 81  | 1   | 81  | 100 Bm_ATCC23344_chr1 | 3510148 | 1433250 | 1433330 | 98  | 396 | 2.80E-13 + |
| BPSL1486 | hypothetical protein BPSL1486                          | 1724107 | 1724802 - | 231 | 53719120 | 3093390 -    | COG1555L   | ATGGTCAAAACCGCCCGCATCCGCG   | 1 | 103 | 1   | 103 | 100 Bm_ATCC23344_chr1 | 3510148 | 1432454 | 1432556 | 100 | 515 | 1.20E-18 - |
| BPSL1490 | hypothetical protein BPSL1490                          | 1727666 | 1729504 - | 612 | 53719124 | 3093011 -    | COG1807M   | CGGGCCGGTTCCGCAAGAAGAGCA    | 1 | 103 | 1   | 103 | 100 Bm_ATCC23344_chr1 | 3510148 | 1427754 | 1427856 | 100 | 515 | 1.20E-18 + |
| BPSL1491 | 50S ribosomal protein L31                              | 1729638 | 1729901 - | 87  | 53719125 | 3093012 -    | COG0254J   | GGCCCCAGTACGAATCGCCCGCCGC   | 1 | 103 | 1   | 103 | 100 Bm_ATCC23344_chr1 | 3510148 | 1427357 | 1427459 | 99  | 506 | 3.00E-18 + |
| BPSL1494 | putative MerF-family transcriptional regulator         | 1732557 | 1733057 - | 166 | 53719128 | 3094530 -    | COG0789K   | CTCGCCGGGCGGTTTTTATTCGCC/   | 1 | 103 | 1   | 103 | 100 Bm_ATCC23344_chr1 | 3510148 | 1424201 | 1424303 | 100 | 515 | 1.20E-18 + |
| BPSL1495 | transcription termination factor Rho                   | 1733194 | 1734456 - | 420 | 53719129 | 3094080 rho  | COG1158K   | TGAGCGCTTCGCGTCCCTCCCTCTCC  | 1 | 69  | 1   | 69  | 100 Bm_ATCC23344_chr1 | 3510148 | 1422836 | 1422904 | 100 | 345 | 5.00E-11 + |
| BPSL1497 | thioredoxin 1                                          | 1734652 | 1734978 - | 108 | 53719131 | 3091475 trxA | COG0526OC  | CCCTTCTTTTCGCAAGAGCGGAGCT   | 1 | 103 | 1   | 103 | 100 Bm_ATCC23344_chr1 | 3510148 | 1422280 | 1422382 | 100 | 515 | 1.20E-18 - |
| BPSL1498 | DNA polymerase III subunits gamma and tau              | 1735645 | 1738122 + | 825 | 53719132 | 3094276 dnaX | COG2812L   | TCCTTCTCTTTTTCGCTCTTCGCG/   | 1 | 103 | 103 | 1   | 100 Bm_ATCC23344_chr1 | 3510148 | 1421714 | 1421816 | 99  | 506 | 3.00E-18 - |
| BPSL1499 | hypothetical protein BPSL1499                          | 1738219 | 1738545 + | 108 | 53719133 | 3092295 -    | COG0718S   | CGCGAGCGCGGCGCGCGCGCGGCTG   | 1 | 99  | 99  | 1   | 100 Bm_ATCC23344_chr1 | 3510148 | 1419140 | 1419238 | 100 | 495 | 9.30E-18 - |
| BPSL1501 | putative transferase                                   | 1739249 | 1740454 + | 401 | 53719135 | 3092296 -    | COG1804C   | CGCGCGCGCGCGCGCGCGCGCGCG    | 1 | 72  | 72  | 1   | 100 Bm_ATCC23344_chr1 | 3510148 | 1418110 | 1418181 | 100 | 360 | 1.20E-11 - |
| BPSL1502 | acid phosphatase                                       | 1740559 | 1741320 + | 253 | 53719136 | 3092285 surE | COG0496R   | CAGGGCGCGCGCGCGCGCGGTTTG    | 1 | 103 | 103 | 1   | 100 Bm_ATCC23344_chr1 | 3510148 | 1416800 | 1416902 | 98  | 497 | 7.60E-18 - |
| BPSL1507 | hypothetical protein BPSL1507                          | 1745236 | 1746096 - | 286 | 53719141 | 3094153 -    | COG3568R   | CAGCTTTCTTCGACGAAGCATGTGTG  | 1 | 80  | 1   | 80  | 100 Bm_ATCC23344_chr1 | 3510148 | 1411188 | 1411267 | 100 | 400 | 1.80E-13 + |
| BPSL1508 | 23S rRNA (uracil-5-)-methyltransferase                 | 1746174 | 1747571 + | 465 | 53719142 | 3092076 rumA | COG2265J   | CGTCGAATCTCCGTTGCTTGGCGGG   | 1 | 80  | 80  | 1   | 100 Bm_ATCC23344_chr1 | 3510148 | 1411185 | 1411264 | 100 | 400 | 1.80E-13 - |
| BPSL1509 | hypothetical protein BPSL1509                          | 1747645 | 1748358 - | 237 | 53719143 | 3092077 -    | COG0670R   | GTTTGAAACCTCCGCGCTCGAAACCT  | 1 | 103 | 1   | 103 | 100 Bm_ATCC23344_chr1 | 3510148 | 1408903 | 1409005 | 98  | 497 | 7.60E-18 + |
| BPSL1510 | nucleoside diphosphate kinase                          | 1748592 | 1749017 + | 141 | 53719144 | 3091685 ndk  | NULL       | CTCTTCGATCGTGTAGCGGCTTCAAT  | 1 | 103 | 103 | 1   | 100 Bm_ATCC23344_chr1 | 3510148 | 1408767 | 1408869 | 100 | 515 | 1.20E-18 - |
| BPSL1512 | hypothetical protein BPSL1512                          | 1750337 | 1751425 + | 362 | 53719146 | 3093086 -    | COG1426S   | CGGGGGCGGGCGCGCGCGCGCGCG    | 1 | 103 | 103 | 1   | 100 Bm_ATCC23344_chr1 | 3510148 | 1407022 | 1407124 | 100 | 515 | 1.20E-18 - |
| BPSL1513 | 4-hydroxy-3-methylbut-2-en-1-yl diphosphate synth      | 1751569 | 1752819 + | 416 | 53719147 | 3094863 -    | NULL       | TGCGCGCGCGCGCGCGCGCGCGCG    | 1 | 103 | 103 | 1   | 100 Bm_ATCC23344_chr1 | 3510148 | 1405790 | 1405892 | 100 | 515 | 1.20E-18 - |
| BPSL1515 | hypothetical protein BPSL1515                          | 1754231 | 1754860 + | 209 | 53719149 | 3094864 -    | COG2976S   | GGCCCGCGCATTCGCTCGACAAAAG   | 1 | 55  | 55  | 1   | 100 Bm_ATCC23344_chr1 | 3510148 | 1403128 | 1403182 | 98  | 266 | 2.10E-07 - |
| BPSL1517 | GTP-binding protein EngA                               | 1756326 | 1757663 + | 445 | 53719151 | 3092256 -    | COG1160R   | GGCCCGACACCGCGCGCGGAATTCGTG | 1 | 103 | 103 | 1   | 100 Bm_ATCC23344_chr1 | 3510148 | 1401034 | 1401136 | 100 | 515 | 1.20E-18 - |
| BPSL1518 | RNA-binding protein Hfq                                | 1757798 | 1758037 + | 79  | 53719152 | 3092453 hfq  | COG1923R   | GGCGGGGCGCGCGCAAAATCGGCTA   | 1 | 103 | 103 | 1   | 100 Bm_ATCC23344_chr1 | 3510148 | 1399562 | 1399664 | 100 | 515 | 1.20E-18 - |
| BPSL1519 | putative GTP-binding protein                           | 1758094 | 1759272 + | 392 | 53719153 | 3092452 hflX | COG2262R   | CCCAATTCGCGCGCTCGGCTCGCTC   | 1 | 59  | 59  | 1   | 100 Bm_ATCC23344_chr1 | 3510148 | 1399266 | 1399324 | 100 | 295 | 1.00E-08 - |
| BPSL1523 | ATP phosphoribosyltransferase regulatory subunit       | 1761911 | 1763059 + | 382 | 53719157 | 3092401 -    | COG3705E   | GGCGCCGTTCCGCGCGCGCGCGGG    | 1 | 103 | 103 | 1   | 100 Bm_ATCC23344_chr1 | 3510148 | 1395449 | 1395551 | 100 | 515 | 1.20E-18 - |
| BPSL1524 | adenylosuccinate synthetase                            | 1763184 | 1764530 + | 448 | 53719158 | 3093829 purA | NULL       | ATGCGCGTTCCGGCTGTCAATGTGGI  | 1 | 103 | 103 | 1   | 100 Bm_ATCC23344_chr1 | 3510148 | 1394176 | 1394278 | 100 | 515 | 1.20E-18 - |
| BPSL1526 | kup system potassium uptake protein                    | 1765422 | 1767314 + | 630 | 53719160 | 3094956 kupK | COG3158P   | AGCAAGTGGTGTGCTGCACAAACCG   | 1 | 103 | 103 | 1   | 100 Bm_ATCC23344_chr1 | 3510148 | 1391939 | 1392041 | 100 | 515 | 1.20E-18 - |
| BPSL1527 | putative transcription accessory protein               | 1767550 | 1769874 + | 774 | 53719161 | 3091541 tex  | COG2183K   | TTATGGCAAAATCCCCCGCTCCATT   | 1 | 103 | 1   | 103 | 100 Bm_ATCC23344_chr1 | 3510148 | 1387390 | 1387492 | 100 | 515 | 1.20E-18 + |
| BPSL1528 | hypothetical protein BPSL1528                          | 1770014 | 1770763 + | 249 | 53719162 | 3092312 -    | NULL       | CGGCGTCCGCGCAGCGCGCGGACAC   | 1 | 103 | 103 | 1   | 100 Bm_ATCC23344_chr1 | 3510148 | 1387150 | 1387252 | 99  | 506 | 3.00E-18 - |
| BPSL1529 | hypothetical protein BPSL1529                          | 1770872 | 1771087 + | 71  | 53719163 | 3091985 -    | NULL       | CGGCTGGCAGCAGGGGTACACGCC    | 1 | 96  | 96  | 1   | 100 Bm_ATCC23344_chr1 | 3510148 | 1386505 | 1386600 | 100 | 480 | 4.40E-17 - |
| BPSL1530 | putative ATP-dependent DNA helicase-related prote      | 1771348 | 1773408 + | 686 | 53719164 | 3091986 -    | COG1199KL  | GAGCGTAAAGCGGTATGCTCGAGCTI  | 1 | 103 | 103 | 1   | 100 Bm_ATCC23344_chr1 | 3510148 | 1386014 | 1386116 | 99  | 506 | 3.00E-18 - |
| BPSL1531 | putative lipoprotein                                   | 1773584 | 1774408 - | 274 | 53719165 | 3091887 -    | COG4105R   | CGGTTTGATGCTGCCCGCAGCGGCAI  | 1 | 103 | 1   | 103 | 100 Bm_ATCC23344_chr1 | 3510148 | 1382856 | 1382958 | 100 | 515 | 1.20E-18 + |
| BPSL1532 | putative ribosomal large subunit pseudouridine synt    | 1774462 | 1775649 + | 395 | 53719166 | 3091888 -    | COG0564J   | CCGCTTCGCGGCGATTCTGCTCGAC   | 1 | 103 | 103 | 1   | 100 Bm_ATCC23344_chr1 | 3510148 | 1382720 | 1382822 | 100 | 515 | 1.20E-18 - |
| BPSL1534 | poly-beta-hydroxybutyrate polymerase                   | 1777009 | 1778814 + | 601 | 53719168 | 3093057 phbC | COG3243I   | CACGTTTAAAGCGATGACGACGCG    | 1 | 103 | 103 | 1   | 100 Bm_ATCC23344_chr1 | 3510148 | 1380353 | 1380455 | 99  | 506 | 3.00E-18 - |
| BPSL1535 | acetyl-CoA acetyltransferase                           | 1778911 | 1780092 + | 393 | 53719169 | 3094224 phbA | COG0183I   | CGAACGGCGCAAGGCGGAGACCGI    | 1 | 99  | 99  | 1   | 100 Bm_ATCC23344_chr1 | 3510148 | 1378442 | 1378540 | 100 | 495 | 9.30E-18 - |
| BPSL1536 | acetoacetyl-CoA reductase                              | 1780218 | 1780958 + | 246 | 53719170 | 3093056 phbB | COG1028IQR | GGCGCGCGCGCGCGCGCGCGCGCG    | 1 | 103 | 103 | 1   | 100 Bm_ATCC23344_chr1 | 3510148 | 1377135 | 1377237 | 100 | 515 | 1.20E-18 - |
| BPSL1537 | hypothetical protein BPSL1537                          | 1781095 | 1781667 + | 190 | 53719171 | 3091519 -    | COG5394S   | TGGGTCGGATGTTCCGGGAACGCCI   | 1 | 103 | 103 | 1   | 100 Bm_ATCC23344_chr1 | 3510148 | 1376258 | 1376360 | 100 | 515 | 1.20E-18 - |
| BPSL1538 | hypothetical protein BPSL1538                          | 1782265 | 1783644 + | 459 | 53719172 | 3093910 -    | COG0621J   | AGAAACCGCGCGCGCGCGGAGGGTA   | 1 | 103 | 103 | 1   | 100 Bm_ATCC23344_chr1 | 3510148 | 1375103 | 1375205 | 100 | 515 | 1.20E-18 - |
| BPSL1540 | beta-ketothiolase                                      | 1784669 | 1785853 + | 394 | 53719174 | 3093104 -    | COG0183I   | CGCCCGCGCGCGCGCGCGCGGATCC   | 1 | 98  | 98  | 1   | 100 Bm_ATCC23344_chr1 | 3510148 | 1372699 | 1372796 | 100 | 490 | 1.60E-17 - |
| BPSL1542 | cystathionine beta-lyase                               | 1786752 | 1787936 + | 394 | 53719176 | 3092176 -    | COG0626E   | CGGCGCGCGCGATTGACCGCGGCC    | 1 | 103 | 103 | 1   | 100 Bm_ATCC23344_chr1 | 3510148 | 1370616 | 1370718 | 99  | 506 | 3.00E-18 - |
| BPSL1543 | putative phosphoserine phosphatase                     | 1788200 | 1789045 + | 281 |          |              |            |                             |   |     |     |     |                       |         |         |         |     |     |            |

|          |                                                     |         |           |     |          |              |                   |                             |   |     |     |     |                       |         |         |         |     |     |            |
|----------|-----------------------------------------------------|---------|-----------|-----|----------|--------------|-------------------|-----------------------------|---|-----|-----|-----|-----------------------|---------|---------|---------|-----|-----|------------|
| BPSL1583 | hypothetical protein BPSL1583                       | 1839642 | 1840157 - | 171 | 53719217 | 3091719 -    | NULL              | CCGCCGTGCTACTAATAGCGCGGA/   | 1 | 103 | 103 | 1   | 100 Bm_ATCC23344_chr1 | 3510148 | 1023337 | 1023439 | 100 | 515 | 1.20E-18 - |
| BPSL1588 | putative AsnC-family transcriptional regulator      | 1842086 | 1842547 + | 153 | 53719218 | 3093966 -    | COG1522K          | CGCGGAGCGCGCCCGCGGCAAA/     | 1 | 103 | 1   | 103 | 100 Bm_ATCC23344_chr1 | 3510148 | 1025163 | 1025265 | 98  | 497 | 7.60E-18 + |
| BPSL1589 | hypothetical protein BPSL1589                       | 1842602 | 1843684 + | 360 | 53719219 | 3093967 -    | NULL              | CGCGCGCGCGCGCGACGACGGCA/    | 1 | 57  | 1   | 57  | 100 Bm_ATCC23344_chr1 | 3510148 | 1025725 | 1025781 | 100 | 285 | 2.80E-08 + |
| BPSL1590 | hypothetical protein BPSL1590                       | 1843714 | 1844196 - | 160 | 53719220 | 3093590 -    | NULL              | GCCCCGTCTGATGCAGCGCATCGC/   | 1 | 103 | 103 | 1   | 100 Bm_ATCC23344_chr1 | 3510148 | 1027371 | 1027473 | 100 | 515 | 1.20E-18 - |
| BPSL1591 | hypothetical protein BPSL1591                       | 1844497 | 1845597 + | 366 | 53719221 | 3093591 -    | COG1748E          | CGGCATCAATTTTCGTCTATAAAGT/  | 1 | 103 | 1   | 103 | 100 Bm_ATCC23344_chr1 | 3510148 | 1027574 | 1027676 | 100 | 515 | 1.20E-18 + |
| BPSL1593 | putative metal ion transport protein                | 1846747 | 1847757 + | 336 | 53719223 | 3091673 -    | COG0598P          | CGCGCGCGCGCGAGCGCGGTGCC/    | 1 | 103 | 1   | 103 | 100 Bm_ATCC23344_chr1 | 3510148 | 1029827 | 1029929 | 99  | 506 | 3.00E-18 + |
| BPSL1594 | hypothetical protein BPSL1594                       | 1847765 | 1848118 - | 117 | 53719224 | 3091674 -    | NULL              | CGCGGTTTCCGCGCGGACGATGCGCG/ | 1 | 103 | 103 | 1   | 100 Bm_ATCC23344_chr1 | 3510148 | 1031296 | 1031398 | 99  | 506 | 3.00E-18 - |
| BPSL1596 | hypothetical protein BPSL1596                       | 1849709 | 1849972 - | 87  | 53719226 | 3092014 -    | NULL              | CGCGCGGCTGCGCATATCGAACCC/   | 1 | 95  | 95  | 1   | 100 Bm_ATCC23344_chr1 | 3510148 | 1033137 | 1033231 | 100 | 475 | 7.40E-17 - |
| BPSL1597 | hypothetical protein BPSL1597                       | 1850065 | 1850436 + | 123 | 53719227 | 3094321 -    | NULL              | AGCGCGGATTGGCGCTCGCGCGCTT/  | 1 | 95  | 1   | 95  | 100 Bm_ATCC23344_chr1 | 3510148 | 1033140 | 1033234 | 100 | 475 | 7.40E-17 + |
| BPSL1598 | putative transport-related, membrane protein        | 1850780 | 1853209 - | 809 | 53719228 | 3094322 -    | COG3264M          | TGTTTCGGATTGTCTGTCGGCGATCC/ | 1 | 103 | 103 | 1   | 100 Bm_ATCC23344_chr1 | 3510148 | 1036371 | 1036473 | 100 | 515 | 1.20E-18 - |
| BPSL1607 | nitrous-oxide reductase precursor                   | 1860683 | 1862650 - | 655 | 53719237 | 3093662 nosZ | COG4263C          | ATGCGCGCAAAATCGTCAACGGCGC/  | 1 | 103 | 103 | 1   | 100 Bm_ATCC23344_chr1 | 3510148 | 1045790 | 1045892 | 100 | 515 | 1.20E-18 - |
| BPSL1608 | putative thiamine biosynthesis lipoprotein          | 1863332 | 1864390 + | 352 | 53719238 | 3094171 -    | NULL              | CACTCGGGCGCGCGCGCGCGAA/     | 1 | 103 | 1   | 103 | 100 Bm_ATCC23344_chr1 | 3510148 | 1046343 | 1046445 | 100 | 515 | 1.20E-18 + |
| BPSL1611 | putative methyl-accepting chemotaxis transmembran   | 1866328 | 1867917 + | 529 | 53719241 | 3094498 -    | COG0840NT         | CCGTGGCGCGCGCGCGCGCGTAAA    | 1 | 103 | 1   | 103 | 100 Bm_ATCC23344_chr1 | 3510148 | 1049339 | 1049441 | 99  | 506 | 3.00E-18 + |
| BPSL1612 | hypothetical protein BPSL1612                       | 1868038 | 1868523 + | 161 | 53719242 | 3092237 -    | NULL              | GTTCGCCCGCGCGCACATAGGTCG/   | 1 | 103 | 1   | 103 | 100 Bm_ATCC23344_chr1 | 3510148 | 1051049 | 1051151 | 98  | 497 | 7.60E-18 + |
| BPSL1613 | putative glycerol utilisation-related protein       | 1868738 | 1870450 + | 570 | 53719243 | 3093238 -    | COG2376G          | CGCGGCTCGCCACGAACGGCGCG/    | 1 | 103 | 3   | 103 | 98 Bm_ATCC23344_chr1  | 3510148 | 1051751 | 1051851 | 100 | 505 | 3.30E-18 + |
| BPSL1618 | hypothetical protein BPSL1618                       | 1875876 | 1876574 - | 232 | 53719248 | 3092088 -    | NULL              | CCGGATATGCACATAGACTGGTCT/   | 1 | 103 | 103 | 1   | 100 Bm_ATCC23344_chr1 | 3510148 | 1059685 | 1059787 | 100 | 515 | 1.20E-18 - |
| BPSL1621 | hypothetical protein BPSL1621                       | 1878828 | 1879178 + | 116 | 53719249 | 3092749 -    | NULL              | CATTGAACGCACATCGAGCGCGTA/   | 1 | 103 | 1   | 103 | 100 Bm_ATCC23344_chr1 | 3510148 | 1061853 | 1061954 | 97  | 482 | 3.60E-17 + |
| BPSL1623 | subfamily S9C non-peptidase homologue               | 1880385 | 1881473 - | 362 | 53719251 | 3092283 -    | COG3509Q          | GGCTGCGAAGCTCTCCGAAGCGCG/   | 1 | 103 | 103 | 1   | 100 Bm_ATCC23344_chr1 | 3510148 | 1064585 | 1064687 | 100 | 515 | 1.20E-18 - |
| BPSL1624 | hypothetical protein BPSL1624                       | 1881764 | 1881955 - | 63  | 53719252 | 3092284 -    | NULL              | GGCGTGGGCTCTGTGGGCGGATGT/   | 1 | 103 | 103 | 1   | 100 Bm_ATCC23344_chr1 | 3510148 | 1065068 | 1065170 | 98  | 497 | 7.60E-18 - |
| BPSL1625 | hypothetical protein BPSL1625                       | 1882057 | 1882524 + | 155 | 53719253 | 3091575 -    | NULL              | GAGCTTCGTGGCGCGACGACGTT/    | 1 | 103 | 1   | 103 | 100 Bm_ATCC23344_chr1 | 3510148 | 1065072 | 1065174 | 98  | 497 | 7.60E-18 + |
| BPSL1626 | putative fimbrial subunit type 1 precursor          | 1883679 | 1884209 + | 176 | 53719254 | 3091576 -    | COG3539NU         | ATCGCGGTTTTTGTGGAAGATTTT/   | 1 | 103 | 1   | 103 | 100 Bm_ATCC23344_chr1 | 3510148 | 1068007 | 1068109 | 100 | 515 | 1.20E-18 + |
| BPSL1627 | putative fimbrial assembly chaperone precursor      | 1884308 | 1885078 + | 256 | 53719255 | 3092023 -    | COG3121NU         | CGGGCGCGCAAGCGTTTCTCGTATG/  | 1 | 101 | 1   | 101 | 100 Bm_ATCC23344_chr1 | 3510148 | 1068637 | 1068737 | 100 | 505 | 3.30E-18 + |
| BPSL1630 | hypothetical protein BPSL1630                       | 1889376 | 1889627 + | 83  | 53719258 | 3094244 -    | NULL              | TTGAGCGGCTTATGCGGCTTATGTCT/ | 1 | 103 | 1   | 102 | 100 Bm_ATCC23344_chr1 | 3510148 | 1073703 | 1073804 | 99  | 501 | 5.00E-18 + |
| BPSL1632 | hypothetical protein BPSL1632                       | 1894492 | 1894977 + | 161 | 53719260 | 3094820 -    | NULL              | CGATTCCCGCTCGATTTCGGCGAGC/  | 1 | 103 | 1   | 103 | 100 Bm_ATCC23344_chr1 | 3510148 | 1078492 | 1078594 | 100 | 515 | 1.20E-18 + |
| BPSL1633 | putative two-component system, response regulator   | 1895264 | 1895929 + | 221 | 53719261 | 3092021 -    | COG2197TK         | ACGCAGGCAATCGTATCGTTTTCG/   | 1 | 103 | 1   | 103 | 100 Bm_ATCC23344_chr1 | 3510148 | 1079275 | 1079377 | 100 | 515 | 1.20E-18 - |
| BPSL1710 | putative penicillin amidase                         | 1994317 | 1996689 - | 790 | 53719324 | 3091709 -    | NULL              | CGCGCGCTGCTGCCCTCGAGCGCG/   | 1 | 103 | 103 | 1   | 100 Bm_ATCC23344_chr1 | 3510148 | 1084001 | 1084102 | 99  | 500 | 5.50E-18 - |
| BPSL1724 | putative histidinol-phosphate aminotransferase      | 2030608 | 2031618 - | 336 | 53719338 | 3092858 -    | COG0079E          | AGCCCGTGGCGACGATGCGGCGG/    | 1 | 64  | 64  | 1   | 100 Bm_ATCC23344_chr1 | 3510148 | 1162379 | 1162442 | 100 | 320 | 7.50E-10 + |
| BPSL1726 | hypothetical protein BPSL1726                       | 2032551 | 2032775 - | 74  | 53719340 | 3094659 -    | NULL              | ATCCGCGCGGCTCTTTCAGCGCATG/  | 1 | 103 | 103 | 1   | 100 Bm_ATCC23344_chr1 | 3510148 | 1163536 | 1163638 | 99  | 506 | 3.00E-18 - |
| BPSL1728 | putative exported porin                             | 2036054 | 2037277 - | 407 | 53719342 | 3092778 -    | COG3203M          | CTCCGTCGCGCAATCGCGCGCGG/    | 1 | 103 | 103 | 1   | 100 Bm_ATCC23344_chr1 | 3510148 | 1168083 | 1168185 | 100 | 515 | 1.20E-18 - |
| BPSL1729 | putative AraC-family transcriptional regulator      | 2037625 | 2038425 + | 266 | 53719343 | 3092779 -    | NULL              | CCTCGCGGGTTCGCGCGCGCGAA/    | 1 | 103 | 1   | 103 | 100 Bm_ATCC23344_chr1 | 3510148 | 1168333 | 1168435 | 100 | 515 | 1.20E-18 - |
| BPSL1730 | putative transmembrane protein                      | 2038590 | 2039528 + | 312 | 53719344 | 3093918 -    | NULL              | ATGGTCTCTGCGCATCGCCGCTCC/   | 1 | 103 | 1   | 103 | 100 Bm_ATCC23344_chr1 | 3510148 | 1169298 | 1169400 | 100 | 515 | 1.20E-18 + |
| BPSL1733 | hypothetical protein BPSL1733                       | 2042724 | 2042912 - | 62  | 53719347 | 3091918 -    | NULL              | TCATAGAGGGATTCAATTTGGCGCG/  | 1 | 103 | 103 | 1   | 100 Bm_ATCC23344_chr1 | 3510148 | 1173718 | 1173821 | 99  | 487 | 2.10E-17 + |
| BPSL1735 | putative transport system membrane protein          | 2045352 | 2046755 + | 467 | 53719349 | 3093699 -    | NULL              | CGCTGAACCGCGCGCGCGCGTCG/    | 1 | 79  | 1   | 79  | 100 Bm_ATCC23344_chr1 | 3510148 | 1176088 | 1176166 | 100 | 395 | 3.30E-13 + |
| BPSL1736 | putative methyltransferase                          | 2047096 | 2047866 - | 256 | 53719350 | 3093700 -    | COG0500QR         | CGCGCATGGAACGGATATTCGCGCT/  | 1 | 103 | 103 | 1   | 100 Bm_ATCC23344_chr1 | 3510148 | 1178820 | 1178922 | 100 | 515 | 1.20E-18 - |
| BPSL1737 | putative ABC transport system, exported protein     | 2048228 | 2049166 + | 312 | 53719351 | 3093342 -    | COG1732M          | CGCGCGCGCTGCTTCGAGCGCGCG/   | 1 | 103 | 1   | 103 | 100 Bm_ATCC23344_chr1 | 3510148 | 1179139 | 1179241 | 100 | 515 | 1.20E-18 + |
| BPSL1738 | putative ABC transport system, membrane protein     | 2049223 | 2050383 + | 386 | 53719352 | 3093343 -    | COG1174E          | CGCCGCGCACGCGCGCGCGCGCG/    | 1 | 59  | 1   | 59  | 100 Bm_ATCC23344_chr1 | 3510148 | 1180178 | 1180236 | 100 | 295 | 1.00E-08 + |
| BPSL1741 | hypothetical protein BPSL1741                       | 2053356 | 2053688 + | 110 | 53719355 | 3093374 -    | NULL              | ACGCGAGAACCGGGGATTCAAAGCG/  | 1 | 103 | 1   | 103 | 100 Bm_ATCC23344_chr1 | 3510148 | 1184267 | 1184369 | 100 | 515 | 1.20E-18 + |
| BPSL1742 | arginine/ornithine antiporter                       | 2053849 | 2055309 + | 486 | 53719356 | 3092544 arcD | COG0531E          | AGGCGGCAAAACCGCGCGCTGCT/    | 1 | 103 | 1   | 103 | 100 Bm_ATCC23344_chr1 | 3510148 | 1184760 | 1184862 | 98  | 497 | 7.60E-18 + |
| BPSL1744 | ornithine carbamoyltransferase                      | 2056648 | 2057658 + | 336 | 53719358 | 3092910 arcB | COG0078E          | CGCGGAACCCAAAGGTCGCGCGCG/   | 1 | 67  | 1   | 67  | 100 Bm_ATCC23344_chr1 | 3510148 | 1187595 | 1187661 | 100 | 335 | 1.60E-10 + |
| BPSL1745 | carbamate kinase                                    | 2057747 | 2058685 + | 312 | 53719359 | 3091935 arcC | COG0549E          | AGGCGCGCGCGCGCGCGTGGAG/     | 1 | 91  | 1   | 91  | 100 Bm_ATCC23344_chr1 | 3510148 | 1188670 | 1188760 | 100 | 455 | 6.00E-16 + |
| BPSL1747 | hypothetical protein BPSL1747                       | 2059719 | 2060168 - | 149 | 53719361 | 3094233 -    | COG3193R          | TAGAAAAATCTGATACGTTTGTGAG/  | 1 | 100 | 100 | 1   | 100 Bm_ATCC23344_chr1 | 3510148 | 1191177 | 1191276 | 100 | 500 | 5.50E-18 - |
| BPSL1748 | putative LysR-family transcriptional regulator      | 2060266 | 2061186 + | 306 | 53719362 | 3094234 -    | COG0583K          | CGCGCGCTCTCTGATGCGGTTGCAT/  | 1 | 100 | 1   | 100 | 100 Bm_ATCC23344_chr1 | 3510148 | 1191180 | 1191279 | 100 | 500 | 5.50E-18 + |
| BPSL1749 | putative glutathione S-transferase                  | 2061471 | 2062175 + | 234 | 53719363 | 3092879 -    | COG0625O          | ACGCGCGGGATCGGCTACATTGTGT/  | 1 | 103 | 1   | 103 | 100 Bm_ATCC23344_chr1 | 3510148 | 1192382 | 1192484 | 98  | 497 | 7.60E-18 - |
| BPSL1750 | putative MarR-family transcriptional regulator      | 2062731 | 2063270 + | 179 | 53719364 | 3092880 -    | COG1846K          | CGCGGAACCGGTCGCGCGCGGACG/   | 1 | 103 | 1   | 103 | 100 Bm_ATCC23344_chr1 | 3510148 | 1193639 | 1193741 | 100 | 515 | 1.20E-18 + |
| BPSL1751 | putative amino-acid transport-related exported prot | 2063491 | 2064606 + | 371 | 53719365 | 3093906 -    | COG0683E          | GTCCATGCATGCGCGAAGCGGATGT/  | 1 | 103 | 1   | 103 | 100 Bm_ATCC23344_chr1 | 3510148 | 1194398 | 1194500 | 100 | 515 | 1.20E-18 + |
| BPSL1752 | putative MarR-family regulatory protein             | 2064914 | 2065408 - | 164 | 53719366 | 3093907 -    | COG1846K          | GTACGGTTGCGCGGACACGCGCAT/   | 1 | 103 | 103 | 1   | 100 Bm_ATCC23344_chr1 | 3510148 | 1196400 | 1196502 | 99  | 506 | 3.00E-18 - |
| BPSL1753 | putative transport-related membrane protein         | 2065532 | 2066716 + | 394 | 53719367 | 3092318 -    | COG2807P          | ATCTTGACGTAGAGCAAGTCGCA/    | 1 | 103 | 1   | 103 | 100 Bm_ATCC23344_chr1 | 3510148 | 1196426 | 1196528 | 99  | 506 | 3.00E-18 + |
| BPSL1754 | putative lipoprotein                                | 2066841 | 2068412 + | 523 | 53719368 | 3092319 -    | COG1649S          | CGCAACCGCCCGCGCGCGCGCGCG/   | 1 | 103 | 5   | 103 | 96 Bm_ATCC23344_chr1  | 3510148 | 1197725 | 1197826 | 91  | 411 | 5.80E-14 + |
| BPSL1755 | precorrin-4 C11-methyltransferase                   | 2068491 | 2069216 - | 241 | 53719369 | 3094850 cobM | COG2875H          | CGCGCTTGGACGCGCAGCGGTGAG/   | 1 | 103 | 103 | 1   | 100 Bm_ATCC23344_chr1 | 3510148 | 1200197 | 1200299 | 100 | 515 | 1.20E-18 - |
| BPSL1758 | precorrin-6Y C5-11-methyltransferase                | 2071377 | 2072603 - | 408 | 53719372 | 3092208 cobL | COG2241H, COG242H | ACGGACGCTGTATTATGCTTTTTC/   | 1 | 103 | 103 | 1   | 100 Bm_ATCC23344_chr1 | 3510148 | 1203584 | 1203686 | 100 | 515 | 1.20E-18 - |
| BPSL1759 | putative oxidoreductase                             | 2073001 | 2074449 + | 482 | 53719373 | 3094470 -    | COG0155P          | CTTTCATCGGGCGGGGTGTACGGA/   | 1 | 103 | 1   | 103 | 100 Bm_ATCC23344_chr1 | 3510148 | 1203884 | 1203986 | 100 | 515 | 1.20E-18 + |
| BPSL1763 | putative exported chitinase                         | 2077979 | 2079352 + | 457 | 53719377 | 3093420 -    | COG3979R          | CGGTTGGATTCTTCATGATGTGCA/   | 1 | 103 | 1   | 103 | 100 Bm_ATCC23344_chr1 | 3510148 | 1208855 | 1208957 | 100 | 515 | 1.20E-18 - |
| BPSL1764 | hypothetical protein BPSL1764                       | 2079715 | 2080041 + | 108 | 53719378 | 3093421 -    | NULL              | TGCAAGTCTGCGCGCAAGCGCGCG/   | 1 | 103 | 1   | 103 | 100 Bm_ATCC23344_chr1 | 3510148 | 1210591 | 1210693 | 100 | 515 | 1.20E-18 + |
| BPSL1766 | hypothetical protein BPSL1766                       | 2081458 | 2082072 - | 204 | 53719380 | 3093425 -    | COG1240H          | TGAGGTCATCGGGCGGATCCCGCG    |   |     |     |     |                       |         |         |         |     |     |            |

|          |                                                      |         |           |     |          |               |           |                            |   |           |     |     |                       |         |         |         |     |     |            |
|----------|------------------------------------------------------|---------|-----------|-----|----------|---------------|-----------|----------------------------|---|-----------|-----|-----|-----------------------|---------|---------|---------|-----|-----|------------|
| BPSL1846 | hypothetical protein BPSL1846                        | 2199174 | 2199671 - | 165 | 53719459 | 3092209 -     | NULL      | GTGCGCCGGCGCAGCATGACCGGC   | 1 | 103       | 103 | 1   | 100 Bm_ATCC23344_chr1 | 3510148 | 1281303 | 1281405 | 98  | 497 | 7.60E-18 - |
| BPSL1847 | hypothetical protein BPSL1847                        | 2199911 | 2200972 - | 353 | 53719460 | 3092210 -     | COG0701R  | CGCCGCCCGCGCGCGCATGGTGTGC  | 1 | 103       | 103 | 1   | 100 Bm_ATCC23344_chr1 | 3510148 | 1282604 | 1282706 | 99  | 506 | 3.00E-18 - |
| BPSL1848 | putative oxidoreductase                              | 2201328 | 2202380 - | 350 | 53719461 | 3094315 -     | COG0667C  | CGAGCGCTGCGCCGGCAGCGGGCTG  | 1 | 103       | 103 | 1   | 100 Bm_ATCC23344_chr1 | 3510148 | 1284012 | 1284114 | 99  | 506 | 3.00E-18 - |
| BPSL1849 | hypothetical protein BPSL1849                        | 2202667 | 2203113 - | 148 | 53719462 | 3094316 -     | COG2050Q  | GTGTGACAGCCGATGAACGTCTGC   | 1 | 103       | 103 | 1   | 100 Bm_ATCC23344_chr1 | 3510148 | 1284734 | 1284836 | 99  | 506 | 3.00E-18 - |
| BPSL1850 | hypothetical protein BPSL1850                        | 2203286 | 2203762 + | 158 | 53719463 | 3094338 -     | COG1733K  | TTGGAGACGGTTTCATCGGCTGTCAA | 1 | 103       | 1   | 103 | 100 Bm_ATCC23344_chr1 | 3510148 | 1284809 | 1284911 | 100 | 515 | 1.20E-18 + |
| BPSL1853 | hypothetical protein BPSL1853                        | 2208821 | 2209075 - | 84  | 53719466 | 3093933 -     | NULL      | CGGGGGCGCGCGCGCGCCGGGGCA   | 1 | 76        | 76  | 1   | 100 Bm_ATCC23344_chr1 | 3510148 | 1293257 | 1293332 | 98  | 371 | 3.70E-12 - |
| BPSL1854 | hypothetical protein BPSL1854                        | 2209149 | 2209394 - | 81  | 53719467 | 3094673 -     | NULL      | CGGGGCGCGCGCGCGCCCGCGTG    | 1 | 83        | 83  | 1   | 100 Bm_ATCC23344_chr1 | 3510148 | 1293576 | 1293659 | 98  | 405 | 1.10E-13 - |
| BPSL1855 | molybdenum-pterin binding protein II                 | 2209475 | 2209690 - | 71  | 53719468 | 3092330 mopII | COG3585H  | CGGGCGCGCGCGCGCGCGCGCGC    | 1 | 91        | 91  | 1   | 100 Bm_ATCC23344_chr1 | 3510148 | 1293873 | 1293963 | 100 | 455 | 6.00E-16 - |
| BPSL1859 | hypothetical protein BPSL1859                        | 2213101 | 2213565 + | 154 | 53719472 | 3094674 -     | NULL      | GGTTTTCCGCTTTCGTGATAGCGGC  | 1 | 103       | 1   | 103 | 100 Bm_ATCC23344_chr1 | 3510148 | 1297200 | 1297302 | 99  | 506 | 3.00E-18 + |
| BPSL1862 | hypothetical protein BPSL1862                        | 2215537 | 2216034 - | 164 | 53719475 | 3093981 -     | NULL      | TCGCGGGCGCGCGCGCGCGCGCTA   | 1 | 103       | 103 | 1   | 100 Bm_ATCC23344_chr1 | 3510148 | 1300231 | 1300333 | 100 | 515 | 1.20E-18 - |
| BPSL1863 | hypothetical protein BPSL1863                        | 2216754 | 2217299 + | 181 | 53719476 | 3091582 -     | COG1051F  | CCCGGGCGCGCGCGCGCGCATGG    | 1 | 103       | 1   | 103 | 100 Bm_ATCC23344_chr1 | 3510148 | 1300852 | 1300954 | 100 | 515 | 1.20E-18 - |
| BPSL1866 | dihydroorotate dehydrogenase                         | 2219044 | 2220072 + | 342 | 53719479 | 3093839 pyrD  | COG0167F  | CCTGGGCGCTTGGCGCGCGCGCG    | 1 | 103       | 1   | 103 | 100 Bm_ATCC23344_chr1 | 3510148 | 1303142 | 1303244 | 99  | 506 | 3.00E-18 + |
| BPSL1867 | putative ABC transport system, cystine-binding prote | 2220192 | 2220986 + | 264 | 53719480 | 3091964 -     | COG0834ET | AACAACCGATTGTTAGACATCGATT  | 1 | 103       | 1   | 103 | 100 Bm_ATCC23344_chr1 | 3510148 | 1304290 | 1304392 | 100 | 515 | 1.20E-18 + |
| BPSL1868 | putative ABC transport system, membrane protein      | 2221116 | 2221775 + | 219 | 53719481 | 3092263 -     | COG0765E  | CGACATCCGGCGCGCGCGGAGGG    | 1 | 103       | 1   | 103 | 100 Bm_ATCC23344_chr1 | 3510148 | 1305214 | 1305316 | 99  | 506 | 3.00E-18 - |
| BPSL1869 | putative oxidoreductase                              | 2222175 | 2223158 - | 327 | 53719482 | 3092264 -     | COG0673R  | CGCCCATCGGTGTCTCGCGCGCGCG  | 1 | 102       | 102 | 1   | 100 Bm_ATCC23344_chr1 | 3510148 | 1308466 | 1308567 | 100 | 510 | 2.00E-18 - |
| BPSL1870 | putative GntR-family regulatory protein              | 2232358 | 2232971 - | 237 | 53719483 | 3092305 -     | COG2186K  | CATAAGAACAAAGGCTGATATGCTG  | 1 | 103       | 103 | 1   | 100 Bm_ATCC23344_chr1 | 3510148 | 1309279 | 1309381 | 100 | 515 | 1.20E-18 - |
| BPSL1871 | ribose-5-phosphate isomerase A                       | 2224309 | 2225004 - | 231 | 53719484 | 3094103 rpiA  | COG0120R  | CGCATGCGGCGCGCGCGCGCGCGG   | 1 | 103       | 103 | 1   | 100 Bm_ATCC23344_chr1 | 3510148 | 1310312 | 1310414 | 100 | 515 | 1.20E-18 - |
| BPSL1872 | putative N-acetylmuramoyl-L-alanine amidase          | 2225273 | 2226172 - | 299 | 53719485 | 3092306 -     | COG3023V  | CACGAAACCGCGCAGGAATGCGAGC  | 1 | 103       | 103 | 1   | 100 Bm_ATCC23344_chr1 | 3510148 | 1311480 | 1311582 | 100 | 515 | 1.20E-18 - |
| BPSL1873 | putative tRNA/rRNA methyltransferase                 | 2226546 | 2227289 - | 247 | 53719486 | 3091946 -     | COG0566J  | CGAAACGCCCGCGCGCGCGCGCAG   | 1 | 103       | 103 | 1   | 100 Bm_ATCC23344_chr1 | 3510148 | 1312597 | 1312699 | 100 | 515 | 1.20E-18 - |
| BPSL1874 | putative ribonuclease                                | 2227421 | 2229955 - | 844 | 53719487 | 3091947 -     | COG0557K  | AGACGCCCAACGAACCTGTCAAC    | 1 | 103       | 103 | 1   | 100 Bm_ATCC23344_chr1 | 3510148 | 1315263 | 1315365 | 100 | 515 | 1.20E-18 - |
| BPSL1875 | putative methyl-accepting chemotaxis protein         | 2230595 | 2232307 - | 570 | 53719488 | 3094733 -     | COG0840NT | TTGTACGGAATTGCCGCAATTAGGA  | 1 | 103       | 103 | 1   | 100 Bm_ATCC23344_chr1 | 3510148 | 1319206 | 1319308 | 100 | 515 | 1.20E-18 - |
| BPSL1876 | putative phospholipase                               | 2232808 | 2234328 + | 506 | 53719489 | 3094734 -     | NULL      | CGTATAACGAACACAGGCTCAATTG  | 1 | 103       | 1   | 103 | 100 Bm_ATCC23344_chr1 | 3510148 | 1319610 | 1319712 | 99  | 506 | 3.00E-18 + |
| BPSL1877 | hypothetical protein BPSL1877                        | 2234635 | 2236161 + | 508 | 53719490 | 3094689 -     | NULL      | AACGCTCGGCCAGGGGCGCGCGCG   | 1 | 103       | 1   | 103 | 100 Bm_ATCC23344_chr1 | 3510148 | 1321417 | 1321519 | 100 | 515 | 1.20E-18 - |
| BPSL1881 | putative metabolite transport, membrane protein      | 2240052 | 2241272 + | 406 | 53719494 | 3094066 -     | NULL      | CGCGAGCGCGCTACCTCGCGTTAT   | 1 | 103       | 1   | 103 | 100 Bm_ATCC23344_chr1 | 3510148 | 1326798 | 1326900 | 100 | 515 | 1.20E-18 + |
| BPSL1882 | putative TetR-family regulatory protein              | 2241489 | 2242445 + | 318 | 53719495 | 3094067 -     | COG1309K  | CGCACCTCGTGTGCTTTTATCTTCTA | 1 | 103       | 1   | 103 | 100 Bm_ATCC23344_chr1 | 3510148 | 1328235 | 1328337 | 100 | 515 | 1.20E-18 - |
| BPSL1883 | putative acyl-CoA synthetase                         | 2242630 | 2244402 + | 590 | 53719496 | 3094522 -     | COG0318IQ | TTTCGTGTTTCAACC CGCGCGCGCG | 1 | 103       | 1   | 103 | 100 Bm_ATCC23344_chr1 | 3510148 | 1329376 | 1329478 | 100 | 515 | 1.20E-18 + |
| BPSL1884 | hypothetical protein BPSL1884                        | 2244462 | 2245421 + | 319 | 53719497 | 3091953 -     | NULL      | TCGGGCGCAACCGCGCGCGCATGA   | 1 | 62        | 1   | 62  | 100 Bm_ATCC23344_chr1 | 3510148 | 1331249 | 1331310 | 99  | 510 | 2.10E-09 + |
| BPSL1885 | hypothetical protein BPSL1885                        | 2245609 | 2245881 - | 90  | 53719498 | 3091745 -     | NULL      | TCGGGTTACAGTCTCGCACGCGC    | 1 | 103       | 103 | 1   | 100 Bm_ATCC23344_chr1 | 3510148 | 1332725 | 1332827 | 99  | 306 | 3.00E-18 - |
| BPSL1886 | hypothetical protein BPSL1886                        | 2246987 | 2247718 - | 243 | 53719500 | 3091423 -     | NULL      | AAGACGGCGCGCAGCGCGCGCAC    | 1 | 75        | 75  | 1   | 100 Bm_ATCC23344_chr1 | 3510148 | 1334523 | 1334597 | 100 | 375 | 2.40E-12 - |
| BPSL1888 | hypothetical protein BPSL1888                        | 2249199 | 2250905 - | 568 | 53719502 | 3093705 -     | COG4655S  | GCCGCTAGCCCGCGCGCGCGCGCA   | 1 | 103       | 103 | 1   | 100 Bm_ATCC23344_chr1 | 3510148 | 1337710 | 1337812 | 99  | 506 | 3.00E-18 - |
| BPSL1894 | putative fimbriae assembly protein                   | 2255773 | 2257013 - | 412 | 53719508 | 3093182 -     | COG4963U  | CGCGCGCAGCGCCAGCGCGCGCGG   | 1 | 69        | 69  | 1   | 100 Bm_ATCC23344_chr1 | 3510148 | 1343712 | 1343780 | 100 | 345 | 5.50E-11 - |
| BPSL1895 | putative exported fimbriae assembly protein          | 2257078 | 2258403 - | 441 | 53719509 | 3093183 -     | COG4964U  | TCGACAAGCGGTTTCGAAACGTGAT  | 1 | 66        | 66  | 1   | 100 Bm_ATCC23344_chr1 | 3510148 | 1345104 | 1345169 | 100 | 330 | 2.60E-10 - |
| BPSL1896 | putative membrane fimbriae assembly protein          | 2258467 | 2259366 - | 299 | 53719510 | 3093657 -     | NULL      | AGTACCGCGCTACGCTAGCGCGCAG  | 1 | 82        | 82  | 1   | 100 Bm_ATCC23344_chr1 | 3510148 | 1346067 | 1346146 | 97  | 380 | 1.50E-12 - |
| BPSL1898 | family A24A unassigned peptidase                     | 2259910 | 2260410 - | 166 | 53719512 | 3093974 -     | COG4960OU | CGTTACATCAATATAGCGCGGTAG   | 1 | 85        | 85  | 1   | 100 Bm_ATCC23344_chr1 | 3510148 | 1347109 | 1347193 | 100 | 425 | 1.40E-14 - |
| BPSL1899 | putative fimbriae assembly related protein           | 2260493 | 2260663 - | 56  | 53719513 | 3093975 -     | NULL      | ACGAAACCGCGCGCGCGCGGATTA   | 1 | Not found |     |     |                       |         |         |         |     |     |            |
| BPSL1903 | putative exported heme utilisation related protein   | 2264383 | 2266062 + | 559 | 53719517 | 3094580 -     | COG2831UJ | GTCCGATCGGCACACGCAAGACCC   | 1 | 103       | 1   | 103 | 100 Bm_ATCC23344_chr1 | 3510148 | 1089936 | 1090038 | 100 | 515 | 1.20E-18 + |
| BPSL1904 | hypothetical protein BPSL1904                        | 2266285 | 2266767 + | 160 | 53719518 | 3093668 -     | COG4731S  | ACTTGTATCAACGCCCGCGCGGGJ   | 1 | 103       | 1   | 103 | 100 Bm_ATCC23344_chr1 | 3510148 | 1091838 | 1091940 | 100 | 515 | 1.20E-18 + |
| BPSL1905 | putative transposase                                 | 2267004 | 2267414 - | 136 | 53719519 | 3093669 -     | COG3293L  | AATTCCGTTATTAACCTTCTTAAATC | 1 | 103       | 103 | 1   | 100 Bm_ATCC23344_chr1 | 3510148 | 1093065 | 1093167 | 100 | 515 | 1.20E-18 - |
| BPSL1906 | hypothetical protein BPSL1906                        | 2267610 | 2268707 - | 365 | 53719520 | 3093678 -     | COG1485R  | CACCGCAACACCGCGCGCGCGCGG   | 1 | 103       | 103 | 1   | 100 Bm_ATCC23344_chr1 | 3510148 | 1094357 | 1094459 | 100 | 515 | 1.20E-18 - |
| BPSL1907 | dihydroliipoamide dehydrogenase                      | 2268814 | 2270244 - | 476 | 53719521 | 3094406 odhL  | COG1249C  | CGACGCTTTTATACCTGCTAGAAC   | 1 | 102       | 102 | 1   | 100 Bm_ATCC23344_chr1 | 3510148 | 1095894 | 1095995 | 100 | 510 | 2.00E-18 - |
| BPSL1909 | 2-oxoglutarate dehydrogenase E1 component            | 2271756 | 2274620 - | 954 | 53719523 | 3094519 sucA  | COG0567C  | GAAGACTTGATTCCGCGCAATCCGCT | 1 | 103       | 103 | 1   | 100 Bm_ATCC23344_chr1 | 3510148 | 1100260 | 1100362 | 100 | 515 | 1.20E-18 - |
| BPSL1911 | GTP-binding protein                                  | 2276550 | 2278376 - | 608 | 53719525 | 3091717 typA  | COG1217T  | CAACGTGCTATAATTTCAGGCTTTTC | 1 | 103       | 103 | 1   | 100 Bm_ATCC23344_chr1 | 3510148 | 1102425 | 1102527 | 100 | 515 | 1.20E-18 - |
| BPSL1912 | putative transcriptional regulatory protein          | 2278669 | 2279166 + | 465 | 53719526 | 3092472 -     | COG1846K  | TGCAAGCCGTGACCAAACTGCCGC   | 1 | 103       | 1   | 103 | 100 Bm_ATCC23344_chr1 | 3510148 | 1102620 | 1102722 | 100 | 515 | 1.20E-18 - |
| BPSL1913 | hypothetical protein BPSL1913                        | 2279266 | 2280762 + | 198 | 53719527 | 3092473 -     | COG1538MU | ATATGTGCATAACCAAGCAATTAGA  | 1 | 102       | 1   | 102 | 100 Bm_ATCC23344_chr1 | 3510148 | 1103218 | 1103319 | 100 | 510 | 2.00E-18 + |
| BPSL1914 | putative multidrug resistance protein A              | 2280830 | 2282065 + | 411 | 53719528 | 3093432 emrA  | COG1566V  | ACCGAATCATTTCCGGCATGCCGGA  | 1 | 70        | 1   | 70  | 100 Bm_ATCC23344_chr1 | 3510148 | 1104814 | 1104883 | 100 | 350 | 3.30E-11 + |
| BPSL1918 | translation initiation factor IF-2                   | 2285354 | 2288281 - | 975 | 53719532 | 3093280 infB  | COG0532J  | GAATGACCATGGCGCACTGATTTC   | 1 | 94        | 94  | 1   | 100 Bm_ATCC23344_chr1 | 3510148 | 1112330 | 1112423 | 100 | 470 | 1.30E-16 - |
| BPSL1920 | hypothetical protein BPSL1920                        | 2289845 | 2290306 - | 153 | 53719534 | 3093802 -     | COG0779S  | GAAACGGTTGGGCATCTCGGTTAG   | 1 | 103       | 103 | 1   | 100 Bm_ATCC23344_chr1 | 3510148 | 1114355 | 1114457 | 100 | 515 | 1.20E-18 - |
| BPSL1921 | hypothetical protein BPSL1921                        | 2290611 | 2292275 - | 504 | 53719535 | 3092190 -     | COG1187J  | GACGGGCGCGCGAACCAGCCGGT    | 1 | 66        | 66  | 1   | 100 Bm_ATCC23344_chr1 | 3510148 | 1116324 | 1116389 | 100 | 330 | 2.60E-10 - |
| BPSL1923 | putative transcriptional regulator                   | 2294125 | 2295027 - | 350 | 53719537 | 3091894 -     | COG0583K  | TGCGTTTCAGCCGAGTGTCTGCACCC | 1 | 103       | 103 | 1   | 100 Bm_ATCC23344_chr1 | 3510148 | 1119037 | 1119139 | 100 | 515 | 1.20E-18 - |
| BPSL1924 | hypothetical protein BPSL1924                        | 2295449 | 2295847 + | 132 | 53719538 | 3091899 -     | COG3293L  | GAGCCGACCGCTCACACCCGGCAC   | 1 | 103       | 1   | 103 | 100 Bm_ATCC23344_chr1 | 3510148 | 1119361 | 1119463 | 100 | 515 | 1.20E-18 + |
| BPSL1925 | hypothetical protein BPSL1925                        | 2296086 | 2296310 + | 74  | 53719539 | 3093711 -     | NULL      | CGCTCCCGCTTAACTAGCGTTTA    | 1 | 103       | 1   | 103 | 100 Bm_ATCC23344_chr1 | 3510148 | 1119998 | 1120100 | 100 | 515 | 1.20E-18 + |
| BPSL1926 | hypothetical protein BPSL1926                        | 2296471 | 2296788 - | 105 | 53719540 | 3093712 -     | NULL      | TATAAGGACCCCTCTTGAGCTGCTG  | 1 | 103       | 103 | 1   | 100 Bm_ATCC23344_chr1 | 3510148 | 1120796 | 1120898 | 100 | 515 | 1.20E-18 - |
| BPSL1927 | hypothetical protein BPSL1927                        | 2296989 | 2297711 + | 240 | 53719541 | 3091702 -     | COG1434S  | ATTCCTTCACTTCTCCGACCGCGG   | 1 | 103       | 1   | 103 | 100 Bm_ATCC23344_chr1 | 3510148 | 1120899 | 1121001 | 100 | 515 | 1.20E-18 + |
| BPSL1929 | hypothetical protein BPSL1929                        | 2297950 | 2298228 + | 92  | 53719542 | 3091703 -     | NULL      | TGCACTGATCGTCACTTTTGATAAA  | 1 | 103       | 1   | 103 | 100 Bm_ATCC23344_chr1 | 3510148 | 112     |         |     |     |            |

|          |                                                     |         |           |      |          |              |                    |                              |   |     |     |     |                       |         |        |        |     |     |            |
|----------|-----------------------------------------------------|---------|-----------|------|----------|--------------|--------------------|------------------------------|---|-----|-----|-----|-----------------------|---------|--------|--------|-----|-----|------------|
| BPSL1963 | hypothetical protein BPSL1963                       | 2337389 | 2339323 - | 644  | 53719575 | 3094772 -    | COG0204I           | ACCCGCGCGCGGGCCGCGCGCGG      | 1 | 102 | 1   | 102 | 100 Bm_ATCC23344_chr1 | 3510148 | 995281 | 995382 | 100 | 510 | 2.00E-18 + |
| BPSL1964 | hypothetical protein BPSL1964                       | 2339423 | 2339887 - | 154  | 53719576 | 3094295 -    | COG0517R           | CCGGGCGAGTTGCCGCAATCGAGCG    | 1 | 103 | 1   | 103 | 100 Bm_ATCC23344_chr1 | 3510148 | 994716 | 994818 | 100 | 515 | 1.20E-18 - |
| BPSL1965 | hypothetical protein BPSL1965                       | 2340104 | 2340424 + | 106  | 53719577 | 3094296 -    | COG4322S           | CCACGGCGGCGCGGATCGCGGGTTG    | 1 | 103 | 103 | 1   | 100 Bm_ATCC23344_chr1 | 3510148 | 994597 | 994699 | 100 | 515 | 1.20E-18 - |
| BPSL1966 | putative tRNA processing exonuclease                | 2340641 | 2341945 - | 434  | 53719578 | 3094823 -    | COG1295S           | AGCGGCTATTATAGGGGCTGAAGC     | 1 | 103 | 1   | 103 | 100 Bm_ATCC23344_chr1 | 3510148 | 992703 | 992805 | 100 | 515 | 1.20E-18 + |
| BPSL1967 | putative Trp repressor binding protein              | 2342060 | 2342668 + | 202  | 53719579 | 3094824 -    | COG0655R           | TTCTCCTATTGCTGCACGTGCCGGG    | 1 | 103 | 103 | 1   | 100 Bm_ATCC23344_chr1 | 3510148 | 992686 | 992788 | 100 | 515 | 1.20E-18 - |
| BPSL1971 | putative LysR-family transcriptional regulator      | 2345922 | 2346863 - | 313  | 53719583 | 3093268 -    | COG0583K           | CGCAATAAACCGGAGAAATGGTGGCA   | 1 | 103 | 1   | 103 | 100 Bm_ATCC23344_chr1 | 3510148 | 987778 | 987880 | 100 | 515 | 1.20E-18 + |
| BPSL1972 | putative antibiotic resistance membrane protein     | 2347021 | 2348973 - | 650  | 53719584 | 3092307 -    | COG1538MU          | CAATGTCCGTAAAGAATGCGTTGCAC   | 1 | 103 | 103 | 1   | 100 Bm_ATCC23344_chr1 | 3510148 | 987718 | 987820 | 100 | 515 | 1.20E-18 - |
| BPSL1976 | putative chemotaxis methyl-accepting membrane pr    | 2352657 | 2354333 - | 558  | 53719588 | 3092697 -    | COG0840NT          | CTCTGCGGTAGAACCTCGGTGCAACI   | 1 | 103 | 1   | 103 | 100 Bm_ATCC23344_chr1 | 3510148 | 980510 | 980612 | 99  | 506 | 3.00E-18 + |
| BPSL1977 | putative fosmidomycin resistance protein            | 2354685 | 2355935 + | 416  | 53719589 | 3093901 fsr  | NULL               | TGCCGATGAGACACATTACACTTCG    | 1 | 103 | 103 | 1   | 100 Bm_ATCC23344_chr1 | 3510148 | 980256 | 980358 | 100 | 515 | 1.20E-18 - |
| BPSL1979 | putative helicase                                   | 2357081 | 2359444 - | 787  | 53719591 | 3094437 -    | COG0210L           | ACCTTCGATTATAAATGATGAGACA    | 1 | 103 | 1   | 103 | 100 Bm_ATCC23344_chr1 | 3510148 | 975422 | 975524 | 100 | 515 | 1.20E-18 + |
| BPSL1980 | valyl-tRNA synthetase                               | 2359584 | 2362451 + | 955  | 53719592 | 3094083 valS | COG0525J           | TTATAAATCGCGCGCGCGCGCGCI     | 1 | 103 | 103 | 1   | 100 Bm_ATCC23344_chr1 | 3510148 | 975380 | 975482 | 100 | 515 | 1.20E-18 - |
| BPSL1981 | UTP--glucose-1-phosphate uridylyltransferase        | 2362538 | 2363419 + | 293  | 53719593 | 3092713 galU | COG1210M           | CAATCCGTAAGGAATCTCGGTTC      | 1 | 89  | 89  | 1   | 100 Bm_ATCC23344_chr1 | 3510148 | 972426 | 972514 | 100 | 445 | 1.70E-15 - |
| BPSL1982 | putative lipoprotein                                | 2363480 | 2364097 - | 205  | 53719594 | 3094438 -    | NULL               | CGACACAGGCATTGCGCGCCCGCG     | 1 | 91  | 1   | 91  | 100 Bm_ATCC23344_chr1 | 3510148 | 970781 | 970871 | 100 | 455 | 6.00E-16 + |
| BPSL1985 | putative two component system, response regulator   | 2367951 | 2368679 - | 242  | 53719597 | 3094683 -    | COG0745TK          | CCGGACAAACCTTCATCATTCAGCC    | 1 | 103 | 1   | 103 | 100 Bm_ATCC23344_chr1 | 3510148 | 966187 | 966289 | 100 | 515 | 1.20E-18 + |
| BPSL1986 | hypothetical protein BPSL1986                       | 2368983 | 2369369 - | 128  | 53719598 | 3094684 -    | NULL               | TCTCGTCTCGAGAATCGCGCGCGCG    | 1 | 103 | 1   | 103 | 100 Bm_ATCC23344_chr1 | 3510148 | 965497 | 965599 | 100 | 515 | 1.20E-18 + |
| BPSL1990 | putative transcriptional regulatory protein         | 2372102 | 2372983 - | 293  | 53719602 | 3093645 -    | COG1737K           | GTGCTTACTTCGCTGCAGACAGCAAC   | 1 | 103 | 1   | 103 | 100 Bm_ATCC23344_chr1 | 3510148 | 961883 | 961985 | 100 | 515 | 1.20E-18 - |
| BPSL1991 | putative sugar ABC transport system, substrate-bind | 2373228 | 2374277 + | 349  | 53719603 | 3093898 -    | COG1879G           | AAATTTTCTTCTCGCAATCGCGCGCA   | 1 | 103 | 103 | 1   | 100 Bm_ATCC23344_chr1 | 3510148 | 961736 | 961838 | 100 | 515 | 1.20E-18 - |
| BPSL1992 | putative sugar ABC transport system, membrane pro   | 2374378 | 2375523 + | 381  | 53719604 | 3093899 -    | COG1172G           | CGTCCATCGGACGATTCGCAGCAGI    | 1 | 103 | 103 | 1   | 100 Bm_ATCC23344_chr1 | 3510148 | 960586 | 960688 | 99  | 506 | 3.00E-18 - |
| BPSL2002 | putative iron-containing alcohol dehydrogenase      | 2386847 | 2387995 - | 382  | 53719614 | 3091834 -    | COG1454C           | CCCGGACGGCGCGCGCTGTCCAG      | 1 | 103 | 1   | 103 | 100 Bm_ATCC23344_chr1 | 3510148 | 946925 | 947027 | 99  | 506 | 3.00E-18 + |
| BPSL2003 | hypothetical protein BPSL2003                       | 2388211 | 2388546 - | 111  | 53719615 | 3094867 -    | NULL               | GGCGCGCGCGCGCGCGCGCGCTGCI    | 1 | 103 | 103 | 1   | 100 Bm_ATCC23344_chr1 | 3510148 | 946807 | 946909 | 99  | 506 | 3.00E-18 - |
| BPSL2004 | putative phosphatase                                | 2388646 | 2389275 - | 209  | 53719616 | 3094868 -    | COG1051F           | CAGCGCGCGCGCATCGCTCGACGG     | 1 | 103 | 1   | 103 | 100 Bm_ATCC23344_chr1 | 3510148 | 945645 | 945747 | 99  | 506 | 3.00E-18 + |
| BPSL2005 | hypothetical protein BPSL2005                       | 2389489 | 2390166 + | 225  | 53719617 | 3091940 -    | NULL               | TCCGGGCTTCGCGCGCGCATGCGCG    | 1 | 103 | 103 | 1   | 100 Bm_ATCC23344_chr1 | 3510148 | 945529 | 945631 | 100 | 515 | 1.20E-18 - |
| BPSL2006 | subfamily S1C non-peptidase homologue               | 2390396 | 2391952 - | 518  | 53719618 | 3091941 -    | COG0265O           | TTCCGCGGCGCGTATGCAATAATAG    | 1 | 103 | 1   | 103 | 100 Bm_ATCC23344_chr1 | 3510148 | 942987 | 943089 | 100 | 515 | 1.20E-18 - |
| BPSL2008 | putative LysR-family transcriptional regulator      | 2394125 | 2395090 - | 321  | 53719620 | 3093973 -    | COG0583K           | GGCCGGTCAAGATCATGCTCGAAGC    | 1 | 103 | 103 | 1   | 100 Bm_ATCC23344_chr1 | 3510148 | 940132 | 940234 | 100 | 515 | 1.20E-18 - |
| BPSL2009 | alanyl-tRNA synthetase                              | 2395633 | 2398257 - | 474  | 53719621 | 3094503 alaS | COG0013J           | TCATCCCGTATAATCGATTGTTTCA    | 1 | 103 | 1   | 103 | 100 Bm_ATCC23344_chr1 | 3510148 | 935941 | 936043 | 100 | 515 | 1.20E-18 - |
| BPSL2010 | putative lipid metabolism-related protein           | 2398792 | 2400012 - | 806  | 53719622 | 3093635 -    | COG1804C           | TCGCGCGGGGAGACGATTCACCGCA    | 1 | 103 | 103 | 1   | 100 Bm_ATCC23344_chr1 | 3510148 | 935371 | 935473 | 100 | 515 | 1.20E-18 - |
| BPSL2011 | putative osmosis-related lipoprotein                | 2400341 | 2400547 - | 68   | 53719623 | 3093636 -    | NULL               | GATTTCCGTTTTTAAGATGCGCTCA    | 1 | 103 | 1   | 103 | 100 Bm_ATCC23344_chr1 | 3510148 | 933523 | 933625 | 99  | 506 | 3.00E-18 + |
| BPSL2012 | glutaminyl-tRNA synthetase                          | 2400830 | 2402539 + | 569  | 53719624 | 3091627 glnS | COG0008J           | GCAAGGGCGCGCGCTCCTCATGAC     | 1 | 103 | 103 | 1   | 100 Bm_ATCC23344_chr1 | 3510148 | 933340 | 933440 | 98  | 485 | 2.60E-17 - |
| BPSL2014 | hypothetical protein BPSL2014                       | 2403398 | 2403784 - | 128  | 53719626 | 3094196 -    | NULL               | GTGTTCAAATACGTTCTGTGCAGT     | 1 | 103 | 1   | 103 | 100 Bm_ATCC23344_chr1 | 3510148 | 930314 | 930416 | 100 | 515 | 1.20E-18 + |
| BPSL2016 | hypothetical protein BPSL2016                       | 2406423 | 2407133 + | 236  | 53719628 | 3091656 -    | NULL               | CGCCGAGCATAGCAGCGTACTTTTC    | 1 | 103 | 103 | 1   | 100 Bm_ATCC23344_chr1 | 3510148 | 927784 | 927886 | 98  | 497 | 7.60E-18 - |
| BPSL2017 | Di-haem cytochrome c peroxidase                     | 2407186 | 2408571 - | 461  | 53719629 | 3094838 -    | COG1858P           | GCTTTCGTTCAGCTGTGCATCGCGG    | 1 | 103 | 1   | 103 | 100 Bm_ATCC23344_chr1 | 3510148 | 925521 | 925623 | 100 | 515 | 1.20E-18 + |
| BPSL2018 | putative acid phosphatase                           | 2408727 | 2410400 + | 557  | 53719630 | 3094839 -    | NULL               | CGCATGACAGTTCGATGACGCCCI     | 1 | 103 | 103 | 1   | 100 Bm_ATCC23344_chr1 | 3510148 | 925463 | 925565 | 99  | 506 | 3.00E-18 - |
| BPSL2020 | HlyD family secretion protein                       | 2412415 | 2413602 - | 395  | 53719632 | 3091471 -    | COG1566V           | GGCAAACGGGAAGCAGGACGGAGI     | 1 | 103 | 103 | 1   | 100 Bm_ATCC23344_chr1 | 3510148 | 921786 | 921888 | 99  | 506 | 3.00E-18 - |
| BPSL2025 | putative two component regulatory system, sensor k  | 2418051 | 2420132 - | 693  | 53719636 | 3093611 -    | COG0642T           | CCGTACCCTAAAGCGGAACGCCGCG    | 1 | 103 | 1   | 103 | 100 Bm_ATCC23344_chr1 | 3510148 | 914005 | 914107 | 99  | 506 | 3.00E-18 - |
| BPSL2027 | putative fibriniae-related protein                  | 2421524 | 2423872 - | 782  | 53719638 | 3093013 -    | COG3188NU          | CAGACACAAGCGACAAATGTCGCG     | 1 | 103 | 1   | 103 | 100 Bm_ATCC23344_chr1 | 3510148 | 910264 | 910366 | 100 | 515 | 1.20E-18 + |
| BPSL2029 | hypothetical protein BPSL2029                       | 2424837 | 2425361 - | 174  | 53719640 | 3093364 -    | COG5430S           | TCCGCGCGCGCGTCCGTTTGGCCCI    | 1 | 79  | 79  | 79  | 100 Bm_ATCC23344_chr1 | 3510148 | 908799 | 908877 | 100 | 395 | 3.10E-13 + |
| BPSL2030 | hypothetical protein BPSL2030                       | 2425438 | 2425998 - | 186  | 53719641 | 3093365 -    | COG5430S           | TCCGGCAGGTATGACAGCAGCATG     | 1 | 55  | 55  | 55  | 100 Bm_ATCC23344_chr1 | 3510148 | 908186 | 908240 | 100 | 275 | 8.00E-08 + |
| BPSL2031 | hypothetical protein BPSL2031                       | 2426051 | 2426596 - | 181  | 53719642 | 3092962 -    | COG5430S           | GGTACGGCATCTCGCGCGCGTGG      | 1 | 103 | 1   | 103 | 100 Bm_ATCC23344_chr1 | 3510148 | 907540 | 907642 | 100 | 515 | 1.20E-18 + |
| BPSL2032 | putative LysR-family transcriptional regulator      | 2427413 | 2428306 - | 297  | 53719643 | 3092963 -    | COG0583K           | GGGCGGAGCGCGGAATGAAGAGCG     | 1 | 103 | 1   | 103 | 100 Bm_ATCC23344_chr1 | 3510148 | 905830 | 905932 | 100 | 515 | 1.20E-18 + |
| BPSL2033 | putative transport-related membrane protein         | 2428723 | 2430009 - | 428  | 53719644 | 3092589 -    | NULL               | CTTTCTGTATGCATATGCTTTATACC   | 1 | 103 | 103 | 1   | 100 Bm_ATCC23344_chr1 | 3510148 | 905511 | 905613 | 100 | 515 | 1.20E-18 - |
| BPSL2035 | putative regulatory protein                         | 2431505 | 2431786 + | 93   | 53719646 | 3092674 -    | COG2916R           | CGCGCGTTCGCTTCGCGCTTTTCA     | 1 | 103 | 103 | 1   | 100 Bm_ATCC23344_chr1 | 3510148 | 902720 | 902822 | 100 | 515 | 1.20E-18 - |
| BPSL2036 | hypothetical protein BPSL2036                       | 2432049 | 2432318 - | 89   | 53719647 | 3092675 -    | NULL               | CGCGGCATATCGCTTCGCGCATGTCTCA | 1 | 103 | 1   | 103 | 100 Bm_ATCC23344_chr1 | 3510148 | 901819 | 901921 | 99  | 506 | 3.00E-18 + |
| BPSL2050 | hypothetical protein BPSL2050                       | 2451504 | 2454302 - | 932  | 53719663 | 3093282 -    | COG3501S, COG4253S | CGGGATGATCGCGCTGCTCAAGTGG    | 1 | 103 | 1   | 103 | 100 Bm_ATCC23344_chr1 | 3510148 | 893867 | 893969 | 100 | 515 | 1.20E-18 - |
| BPSL2051 | hypothetical protein BPSL2051                       | 2454823 | 2455089 + | 88   | 53719664 | 3093693 -    | COG4104S           | CGGGATTAGCGCGGTAAATCGGCI     | 1 | 103 | 103 | 1   | 100 Bm_ATCC23344_chr1 | 3510148 | 893444 | 893546 | 99  | 506 | 3.00E-18 - |
| BPSL2053 | hypothetical protein BPSL2053                       | 2456556 | 2458406 - | 616  | 53719666 | 3092313 -    | COG3519S           | CGCGTCGCTCGAGCGTTTGGCCCI     | 1 | 103 | 1   | 103 | 100 Bm_ATCC23344_chr1 | 3510148 | 889763 | 889865 | 100 | 515 | 1.20E-18 + |
| BPSL2055 | hypothetical protein BPSL2055                       | 2459672 | 2460508 - | 278  | 53719668 | 3092165 -    | COG0657I           | ATAGCGCGGTGCGGAACGCCGCGCA    | 1 | 103 | 1   | 103 | 100 Bm_ATCC23344_chr1 | 3510148 | 887639 | 887741 | 100 | 515 | 1.20E-18 + |
| BPSL2056 | putative oxidase                                    | 2460880 | 2463447 + | 855  | 53719669 | 3092166 -    | NULL               | CGCGTGATTACAGAAAAGTTCAAAAC   | 1 | 103 | 103 | 1   | 100 Bm_ATCC23344_chr1 | 3510148 | 887365 | 887467 | 100 | 515 | 1.20E-18 - |
| BPSL2062 | OmpA family protein                                 | 2467187 | 2467897 - | 236  | 53719675 | 3094075 -    | COG2885M           | CCGAGTTCACCGGCGGATTCATCGAC   | 1 | 83  | 1   | 83  | 100 Bm_ATCC23344_chr1 | 3510148 | 880303 | 880385 | 100 | 415 | 3.80E-14 - |
| BPSL2063 | hypothetical protein BPSL2063                       | 2467978 | 2471250 - | 1090 | 53719676 | 3093202 -    | NULL               | GAATGTTTCAGATTCCGATTTCGCCCT  | 1 | 73  | 1   | 73  | 100 Bm_ATCC23344_chr1 | 3510148 | 876945 | 877017 | 98  | 356 | 1.80E-11 + |
| BPSL2065 | putative two component system, response regulator   | 2471650 | 2472360 - | 236  | 53719678 | 3093071 -    | COG0745TK          | AGTCCTTCGGATTCTCGGCTGTTCAC   | 1 | 103 | 1   | 103 | 100 Bm_ATCC23344_chr1 | 3510148 | 875843 | 875946 | 99  | 505 | 3.30E-18 + |
| BPSL2068 | putative two component system, response regulator   | 2474112 | 2474894 - | 260  | 53719681 | 3093710 -    | COG0745TK          | GAATATATTAACAATAAACGGGCC     | 1 | 103 | 1   | 103 | 100 Bm_ATCC23344_chr1 | 3510148 | 873302 | 873404 | 100 | 515 | 1.20E-18 + |
| BPSL2069 | putative LysR-family transcriptional regulator      | 2475308 | 2476240 - | 313  | 53719682 | 3093695 -    | COG0583K           | TCGCGCGGTGGACGTTTGGCGGCT     | 1 | 103 | 1   | 103 | 100 Bm_ATCC23344_chr1 | 3510148 | 871956 | 872058 | 100 | 515 | 1.20E-18 - |
| BPSL2070 | hypothetical protein BPSL2070                       | 2476552 | 2477943 - | 463  | 53719683 | 3093696 -    | NULL               | TTACAACGAGTCAGAGACATAGCATI   | 1 | 103 | 1   | 103 | 100 Bm_ATCC23344_chr1 | 3510148 | 870253 | 870355 | 100 | 515 | 1.20E-18 + |
| BPSL2073 | poly(3-hydroxybutyrate) depolymerase precursor      | 2480505 | 2481983 + | 492  | 53719686 | 3093222 phaZ | COG3509Q, COG3979R | AATCGAAACGGCAGCAACGACGCC     | 1 | 103 | 103 | 1   | 100 Bm_ATCC23344_chr1 | 3510148 | 867806 | 867908 | 99  | 506 |            |

|          |                                                                                         |         |           |      |          |              |                    |                            |   |     |     |     |                       |         |         |         |     |     |            |
|----------|-----------------------------------------------------------------------------------------|---------|-----------|------|----------|--------------|--------------------|----------------------------|---|-----|-----|-----|-----------------------|---------|---------|---------|-----|-----|------------|
| BPSL2107 | large-conductance mechanosensitive channel                                              | 2533099 | 2533530 + | 143  | 53719718 | 3092570 mscL | NULL               | ATCGATAAAAGGATCGGTTCTGTAT  | 1 | 103 | 1   | 103 | 100 Bm_ATCC23344_chr1 | 3510148 | 1560045 | 1560147 | 99  | 506 | 3.00E-18 + |
| BPSL2108 | hypothetical protein BPSL2108                                                           | 2533842 | 2543339 + | 165  | 53719719 | 3093806 -    | NULL               | CCGGTTCGGAGCAGCGCGGCAAA    | 1 | 103 | 1   | 103 | 100 Bm_ATCC23344_chr1 | 3510148 | 1560789 | 1560891 | 100 | 515 | 1.20E-18 + |
| BPSL2116 | putative allantoicase                                                                   | 2542680 | 2543693 + | 337  | 53719727 | 3094422 -    | NULL               | CGCGCCGACAGCGCGCGCTCTGT    | 1 | 103 | 103 | 1   | 100 Bm_ATCC23344_chr1 | 3510148 | 1565380 | 1565482 | 99  | 506 | 3.00E-18 - |
| BPSL2118 | hypothetical protein BPSL2118                                                           | 2544443 | 2545396 - | 317  | 53719729 | 3093925 -    | NULL               | CTACACTGGGCCATCCGTCGCTTG   | 1 | 103 | 103 | 1   | 100 Bm_ATCC23344_chr1 | 3510148 | 1567083 | 1567185 | 97  | 488 | 1.90E-17 - |
| BPSL2120 | putative transport-related membrane protein                                             | 2546527 | 2548059 - | 150  | 53719731 | 3091738 -    | COG1955FH          | CCCGGAACGGCGTCACTGAAGTCGA  | 1 | 103 | 103 | 1   | 100 Bm_ATCC23344_chr1 | 3510148 | 1569710 | 1569812 | 99  | 506 | 3.00E-18 - |
| BPSL2121 | putative GntR-family transcriptional regulator                                          | 2548172 | 2548876 - | 234  | 53719732 | 3093416 -    | COG1802K           | CAGCGAAATGAAGCGCGCTCGGC    | 1 | 103 | 103 | 1   | 100 Bm_ATCC23344_chr1 | 3510148 | 1570527 | 1570629 | 100 | 515 | 1.20E-18 - |
| BPSL2122 | muramoyl-tetrapeptide carboxypeptidase                                                  | 2549191 | 2550132 - | 313  | 53719733 | 3093417 -    | COG1619V           | ACCCGCGCGCGCGGAGCGCTCTCA   | 1 | 58  | 58  | 1   | 100 Bm_ATCC23344_chr1 | 3510148 | 1573096 | 1573153 | 100 | 290 | 1.70E-08 - |
| BPSL2123 | putative deaminase                                                                      | 2550188 | 2550712 - | 174  | 53719734 | 3091900 -    | COG0590FJ          | GGCGCGCGCGCGCGTCCGGCTCGC   | 1 | 71  | 71  | 1   | 100 Bm_ATCC23344_chr1 | 3510148 | 1573676 | 1573746 | 100 | 355 | 2.00E-11 - |
| BPSL2124 | hypothetical protein BPSL2124                                                           | 2550781 | 2551182 - | 133  | 53719735 | 3091901 -    | NULL               | TTCTCGCGTCCGGGCGCGGATCGCA  | 1 | 103 | 103 | 1   | 100 Bm_ATCC23344_chr1 | 3510148 | 1574146 | 1574248 | 100 | 515 | 1.20E-18 - |
| BPSL2125 | hypothetical protein BPSL2125                                                           | 2551984 | 2552490 - | 168  | 53719736 | 3091514 -    | COG3812S           | GGCGCATCGAGGTGGGCTATCCGA   | 1 | 103 | 103 | 1   | 100 Bm_ATCC23344_chr1 | 3510148 | 1575452 | 1575554 | 100 | 515 | 1.20E-18 - |
| BPSL2126 | putative transport-related, membrane protein                                            | 2552858 | 2554078 + | 406  | 53719737 | 3091515 -    | NULL               | CTTCGCGATGTTTCAATTGCAACG   | 1 | 103 | 1   | 103 | 100 Bm_ATCC23344_chr1 | 3510148 | 1575722 | 1575824 | 100 | 515 | 1.20E-18 + |
| BPSL2127 | bifunctional GMP synthase/glutamine amidotransferase                                    | 2555410 | 2557053 - | 547  | 53719738 | 3093632 guaA | COG0518F, COG0519F | GGCGGTTTTCGGCGCCGTCAGGCC   | 1 | 103 | 103 | 1   | 100 Bm_ATCC23344_chr1 | 3510148 | 1580016 | 1580118 | 100 | 515 | 1.20E-18 - |
| BPSL2129 | inositol-5-monophosphate dehydrogenase                                                  | 2557817 | 2559277 - | 486  | 53719740 | 3092041 guaB | COG0516F, COG0517R | ATCCGAACGATTGGGGCCCAACACI  | 1 | 103 | 103 | 1   | 100 Bm_ATCC23344_chr1 | 3510148 | 1582240 | 1582342 | 100 | 515 | 1.20E-18 - |
| BPSL2130 | hypothetical protein BPSL2130                                                           | 2559694 | 2560458 - | 254  | 53719741 | 3091513 -    | COG4312S           | AGCCCCGCGACTAATCTACCACACAC | 1 | 103 | 103 | 1   | 100 Bm_ATCC23344_chr1 | 3510148 | 1583422 | 1583524 | 100 | 515 | 1.20E-18 - |
| BPSL2134 | hypothetical protein BPSL2134                                                           | 2562571 | 2563539 + | 322  | 53719743 | 3093758 -    | NULL               | CATCGACCAAGCGGAGCGCCGAAT   | 1 | 103 | 1   | 103 | 100 Bm_ATCC23344_chr1 | 3510148 | 1585730 | 1585832 | 100 | 515 | 1.20E-18 + |
| BPSL2136 | hypothetical protein BPSL2136                                                           | 2564020 | 2564457 - | 145  | 53719745 | 3094452 -    | COG2867I           | GAAGGGAAATGGCCAACCTCGTTTA  | 1 | 100 | 100 | 1   | 100 Bm_ATCC23344_chr1 | 3510148 | 1587707 | 1587806 | 100 | 500 | 5.50E-18 - |
| BPSL2137 | SsrA-binding protein                                                                    | 2564555 | 2565001 - | 148  | 53719746 | 3092303 smpB | COG0691O           | AAATCGCGGGGATCGCAAAAGGTA   | 1 | 100 | 1   | 100 | 100 Bm_ATCC23344_chr1 | 3510148 | 1587710 | 1587809 | 100 | 500 | 5.50E-18 + |
| BPSL2138 | hypothetical protein BPSL2138                                                           | 2565179 | 2566126 - | 315  | 53719747 | 3094453 -    | COG0330O           | GGCGCGCATTTTTCATAGCACTTTC  | 1 | 82  | 82  | 1   | 100 Bm_ATCC23344_chr1 | 3510148 | 1589367 | 1589448 | 100 | 410 | 6.40E-14 - |
| BPSL2139 | hypothetical protein BPSL2139                                                           | 2566206 | 2566640 - | 144  | 53719748 | 3094454 -    | NULL               | AATTGCGCGATTGCGCGCCGATGA   | 1 | 103 | 103 | 1   | 100 Bm_ATCC23344_chr1 | 3510148 | 1589881 | 1589983 | 98  | 497 | 7.60E-18 - |
| BPSL2140 | phosphoenolpyruvate synthase                                                            | 2566768 | 2569167 - | 799  | 53719749 | 3092220 ppsA | COG0574G           | TTATCTCGACAGTTGTGCAATGCGC  | 1 | 103 | 103 | 1   | 100 Bm_ATCC23344_chr1 | 3510148 | 1592408 | 1592510 | 99  | 506 | 3.00E-18 - |
| BPSL2142 | family S53 unassigned peptidase                                                         | 2571036 | 2572925 - | 629  | 53719751 | 3092352 -    | COG4934O           | GAGAGCGCGCTCGTTCGCCCTCGG   | 1 | 103 | 103 | 1   | 100 Bm_ATCC23344_chr1 | 3510148 | 1596118 | 1596220 | 100 | 515 | 1.20E-18 - |
| BPSL2143 | hypothetical protein BPSL2143                                                           | 2573475 | 2574290 + | 271  | 53719752 | 3092353 -    | NULL               | AGCCGTTTCCGCGATCGCGCCGGGT  | 1 | 103 | 1   | 103 | 100 Bm_ATCC23344_chr1 | 3510148 | 1596555 | 1596657 | 100 | 515 | 1.20E-18 + |
| BPSL2147 | UDP-N-acetylglucosamine acyltransferase                                                 | 2577091 | 2577879 - | 262  | 53719756 | 3093538 lpxA | COG1043M           | CAGCGCGCGACGCAAGGTCACGCG   | 1 | 58  | 58  | 1   | 100 Bm_ATCC23344_chr1 | 3510148 | 1601057 | 1601114 | 100 | 290 | 1.70E-08 - |
| BPSL2148 | (3R)-hydroxymyristoyl ACP dehydratase                                                   | 2577935 | 2578444 - | 169  | 53719757 | 3094303 fabZ | COG0764I           | CCGCTCGCGCGCAACCGCGCGCGC   | 1 | 103 | 103 | 1   | 100 Bm_ATCC23344_chr1 | 3510148 | 1601622 | 1601724 | 99  | 506 | 3.00E-18 - |
| BPSL2151 | putative outer membrane protein                                                         | 2580221 | 2582530 - | 769  | 53719760 | 3092935 -    | COG4775M           | CGCTCTCGGCGCGACCGGTAACGC   | 1 | 67  | 67  | 1   | 100 Bm_ATCC23344_chr1 | 3510148 | 1605708 | 1605774 | 100 | 335 | 1.60E-10 - |
| BPSL2156 | ribosome releasing factor                                                               | 2586860 | 2587420 - | 189  | 53719765 | 3093900 frr  | NULL               | ACTCTCGCGATCGCGGAGCGCGCTG  | 1 | 93  | 93  | 1   | 100 Bm_ATCC23344_chr1 | 3510148 | 1610598 | 1610690 | 100 | 465 | 2.10E-16 - |
| BPSL2157 | uridylate kinase                                                                        | 2587511 | 2588224 - | 237  | 53719766 | 3093161 tsfH | COG0528F           | GACGGGGCTCTCAGCGAGCCGCGC   | 1 | 103 | 103 | 1   | 100 Bm_ATCC23344_chr1 | 3510148 | 1611402 | 1611504 | 98  | 497 | 7.60E-18 - |
| BPSL2158 | elongation factor Ts                                                                    | 2588403 | 2589284 - | 293  | 53719767 | 3092745 pyrF | NULL               | CCGCGCGCGCGCAAAAATCGCGC    | 1 | 103 | 103 | 1   | 100 Bm_ATCC23344_chr1 | 3510148 | 1612462 | 1612564 | 100 | 515 | 1.20E-18 - |
| BPSL2159 | 30S ribosomal protein S2                                                                | 2589467 | 2590207 - | 246  | 53719768 | 3093074 rpsB | NULL               | ACCCAGGGTGTCGCGGCGCGGACC   | 1 | 103 | 103 | 1   | 100 Bm_ATCC23344_chr1 | 3510148 | 1613385 | 1613486 | 99  | 500 | 5.50E-18 - |
| BPSL2160 | methionine aminopeptidase                                                               | 2590690 | 2591505 + | 271  | 53719769 | 3094064 map  | COG0024J           | GAGCCGGCCGGGATTCCGCGCTCG   | 1 | 103 | 1   | 103 | 100 Bm_ATCC23344_chr1 | 3510148 | 1613769 | 1613871 | 100 | 515 | 1.20E-18 - |
| BPSL2161 | PII uridylyl-transferase                                                                | 2591671 | 2594247 + | 858  | 53719770 | 3093139 -    | COG2844O           | CTCGCCCGCGCTAGCGCGCGCGTG   | 1 | 103 | 1   | 103 | 100 Bm_ATCC23344_chr1 | 3510148 | 1614750 | 1614852 | 100 | 515 | 1.20E-18 + |
| BPSL2164 | DNA ligase                                                                              | 2596711 | 2598786 - | 691  | 53719773 | 3092689 ligA | COG0272L           | CCGCGATTTCACGCTCGAGCGCGC   | 1 | 103 | 103 | 1   | 100 Bm_ATCC23344_chr1 | 3510148 | 1621930 | 1622032 | 99  | 506 | 3.00E-18 - |
| BPSL2165 | hypothetical protein BPSL2165                                                           | 2599226 | 2600512 - | 428  | 53719774 | 3093959 -    | NULL               | CGTATGACGAATGGCAGCGCGCGC   | 1 | 69  | 69  | 1   | 100 Bm_ATCC23344_chr1 | 3510148 | 1623639 | 1623707 | 100 | 345 | 5.50E-11 - |
| BPSL2166 | putative chromosome partition protein                                                   | 2600579 | 2604091 - | 1170 | 53719775 | 3091528 -    | COG1196D           | GGAATCTTGGGCGTGGCGCGCGGTC  | 1 | 103 | 103 | 1   | 100 Bm_ATCC23344_chr1 | 3510148 | 1627218 | 1627322 | 98  | 495 | 9.30E-18 - |
| BPSL2167 | hypothetical protein BPSL2167                                                           | 2604240 | 2605187 - | 315  | 53719776 | 3091529 -    | COG0697GER         | GGCGCGCGCGGACGCGCGCTCGATG  | 1 | 103 | 103 | 1   | 100 Bm_ATCC23344_chr1 | 3510148 | 1628316 | 1628418 | 100 | 515 | 1.20E-18 - |
| BPSL2168 | hypothetical protein BPSL2168                                                           | 2605452 | 2606684 + | 410  | 53719777 | 3093039 -    | COG0436E           | CGCCCGCGCAAGCGCGGCGGACGCC  | 1 | 103 | 1   | 103 | 100 Bm_ATCC23344_chr1 | 3510148 | 1628483 | 1628585 | 100 | 515 | 1.20E-18 - |
| BPSL2169 | 2,3,4,5-tetrahydropyridine-2,6-dicarboxylate N-succinyl-L-diaminopimelate desuccinylase | 2606741 | 2607568 + | 275  | 53719778 | 3091791 dapD | COG2171E           | ACGCGCGCGCAAGCGCCGCGATTC   | 1 | 59  | 1   | 59  | 100 Bm_ATCC23344_chr1 | 3510148 | 1629816 | 1629874 | 100 | 295 | 1.00E-08 + |
| BPSL2171 | succinyl-L-diaminopimelate desuccinylase                                                | 2608004 | 2609155 + | 383  | 53719780 | 3091792 dapE | COG0624E           | GGCGCGCGCGCGCGCGCCCCAAC    | 1 | 64  | 1   | 64  | 100 Bm_ATCC23344_chr1 | 3510148 | 1631068 | 1631131 | 100 | 320 | 7.50E-10 + |
| BPSL2175 | glutathione peroxidase                                                                  | 2611872 | 2612351 - | 159  | 53719784 | 3094481 gpo  | COG0386O           | TTGCGGGGATCGTCCGATGCGGGG   | 1 | 103 | 103 | 1   | 100 Bm_ATCC23344_chr1 | 3510148 | 1635429 | 1635531 | 100 | 515 | 1.20E-18 - |
| BPSL2176 | putative ABC transport system, ATP-binding protein                                      | 2612497 | 2614437 + | 646  | 53719785 | 3091906 -    | COG0488O           | CTGTAGGCGAATTCGCGCGCGCGG   | 1 | 103 | 1   | 103 | 100 Bm_ATCC23344_chr1 | 3510148 | 1635477 | 1635579 | 100 | 515 | 1.20E-18 + |
| BPSL2177 | hypothetical protein BPSL2177                                                           | 2614525 | 2614857 - | 110  | 53719786 | 3091617 -    | NULL               | CGCGCGCGCGCGCGGTTTTCGCGCC  | 1 | 100 | 100 | 1   | 100 Bm_ATCC23344_chr1 | 3510148 | 1637935 | 1638034 | 100 | 500 | 5.50E-18 - |
| BPSL2179 | alanine racemase                                                                        | 2616342 | 2617412 - | 356  | 53719788 | 3092804 alr  | COG0787M           | CGGACTAGCAAGATCCCCCGTGAAC  | 1 | 103 | 103 | 1   | 100 Bm_ATCC23344_chr1 | 3510148 | 1640490 | 1640592 | 99  | 506 | 3.00E-18 - |
| BPSL2180 | hypothetical protein BPSL2180                                                           | 2617624 | 2618931 + | 435  | 53719789 | 3091618 -    | NULL               | TTTCTGATATAAAGCGTGGCGCAC   | 1 | 103 | 1   | 103 | 100 Bm_ATCC23344_chr1 | 3510148 | 1640604 | 1640706 | 100 | 515 | 1.20E-18 - |
| BPSL2181 | phosphomethylpyrimidine kinase                                                          | 2619042 | 2619851 + | 269  | 53719790 | 3091851 thiD | COG0351H           | GGCGCGCCCATGCGCGCGCGCTGTG  | 1 | 103 | 1   | 103 | 100 Bm_ATCC23344_chr1 | 3510148 | 1642022 | 1642124 | 100 | 515 | 1.20E-18 + |
| BPSL2186 | putative acyl-CoA-binding protein                                                       | 2624009 | 2624278 + | 89   | 53719795 | 3093962 -    | COG4281I           | GGCAATCGGTTTGGAAAGGAAGCTC  | 1 | 103 | 1   | 103 | 100 Bm_ATCC23344_chr1 | 3510148 | 1646953 | 1647055 | 100 | 515 | 1.20E-18 - |
| BPSL2187 | putative ATP-dependent RNA helicase                                                     | 2624724 | 2626274 + | 516  | 53719796 | 3093963 -    | COG0513LJ          | CGAGGCGCGGACGCTCGCGACGC    | 1 | 103 | 1   | 103 | 100 Bm_ATCC23344_chr1 | 3510148 | 1647857 | 1647959 | 100 | 515 | 1.20E-18 + |
| BPSL2188 | isocitrate lyase                                                                        | 2626666 | 2627973 + | 435  | 53719797 | 3092651 aceA | COG2224C           | GACTTCAGCAACGAACCGCGCGAAC  | 1 | 103 | 1   | 103 | 100 Bm_ATCC23344_chr1 | 3510148 | 1651202 | 1651304 | 100 | 515 | 1.20E-18 + |
| BPSL2189 | universal stress protein family protein                                                 | 2628233 | 2628667 - | 144  | 53719798 | 3092701 -    | COG0589T           | CAATCGAATCACTCGGCGTCCGGCG  | 1 | 103 | 103 | 1   | 100 Bm_ATCC23344_chr1 | 3510148 | 1653301 | 1653403 | 100 | 515 | 1.20E-18 - |
| BPSL2190 | putative LysR-family regulatory protein                                                 | 2628947 | 2629849 - | 300  | 53719799 | 3092702 -    | COG0583K           | AAAAGACAGTAAATCATCACTTGATC | 1 | 103 | 103 | 1   | 100 Bm_ATCC23344_chr1 | 3510148 | 1654483 | 1654585 | 100 | 515 | 1.20E-18 - |
| BPSL2191 | putative dehalogenase                                                                   | 2630009 | 2630791 + | 260  | 53719800 | 3093354 -    | COG1011R           | ATATCGAAAGTAAAAGCATCAAGTC  | 1 | 103 | 1   | 103 | 100 Bm_ATCC23344_chr1 | 3510148 | 1654545 | 1654647 | 100 | 515 | 1.20E-18 - |
| BPSL2192 | malate synthase                                                                         | 2630844 | 2632436 + | 530  | 53719801 | 3092656 aceB | COG2225C           | TTCAATGCAATTGCACCATCTGTAA  | 1 | 55  | 1   | 55  | 100 Bm_ATCC23344_chr1 | 3510148 | 1655428 | 1655482 | 100 | 275 | 8.00E-08 + |
| BPSL2194 | ribonuclease activity regulator protein RraA                                            | 2633488 | 2633985 - | 165  | 53719803 | 3093172 menG | NULL               | TCCGGCTATTGTAGGCGAGCCTTCC  | 1 | 103 | 103 | 1   | 100 Bm_ATCC23344_chr1 | 3510148 | 1658898 | 1659000 | 100 | 515 | 1.20E-18 - |
| BPSL2195 | putative AraC-family transcriptional regulator                                          | 2634115 | 2634978 + | 287  | 53719804 | 3093293 -    | NULL               | TCGATCCGCGATTATCGCGGAAGAA  | 1 | 103 | 1   | 103 | 100 Bm_ATCC23344_chr1 | 3510148 | 1658930 | 1659032 | 98  | 497 | 7.60E-18 + |
| BPSL2196 | putative acetyltransferase                                                              | 2635582 | 2636049 - | 155  | 53719805 | 3093294 -    | NULL</             |                            |   |     |     |     |                       |         |         |         |     |     |            |

|          |                                                       |         |           |     |          |              |                     |                            |   |     |     |     |                       |         |         |         |     |     |            |
|----------|-------------------------------------------------------|---------|-----------|-----|----------|--------------|---------------------|----------------------------|---|-----|-----|-----|-----------------------|---------|---------|---------|-----|-----|------------|
| BPSL2231 | hypothetical protein BPSL2231                         | 2684134 | 2685435 - | 433 | 53719840 | 3093109 -    | NULL                | TCGGCCTCGCGGCCGGACATGG     | 1 | 70  | 70  | 1   | 100 Bm_ATCC23344_chr1 | 3510148 | 1709969 | 1710038 | 100 | 350 | 3.30E-11 - |
| BPSL2234 | hypothetical protein BPSL2234                         | 2690294 | 2691574 + | 426 | 53719843 | 3093295 -    | COG0845M            | CGCGGCCCGCGTGAGCCCGCGGC    | 1 | 103 | 1   | 103 | 100 Bm_ATCC23344_chr1 | 3510148 | 1714721 | 1714823 | 100 | 515 | 1.20E-18 + |
| BPSL2236 | hypothetical protein BPSL2236                         | 2694795 | 2696015 + | 406 | 53719845 | 3092819 -    | NULL                | CGGGCATCGCGCGCGCATCAGCG    | 1 | 80  | 1   | 80  | 100 Bm_ATCC23344_chr1 | 3510148 | 1719242 | 1719321 | 100 | 400 | 1.80E-13 + |
| BPSL2237 | putative exported lipase                              | 2696054 | 2697886 - | 610 | 53719846 | 3092820 -    | COG3240IR, COG4625S | GCCCGCGCGTTTCAACCGTGATTC   | 1 | 103 | 103 | 1   | 100 Bm_ATCC23344_chr1 | 3510148 | 1722408 | 1722509 | 98  | 491 | 1.40E-17 - |
| BPSL2239 | aspartate kinase                                      | 2700393 | 2701643 - | 416 | 53719848 | 3094028 ask  | COG0527E            | GTTCCTCCCGTCGTCGGTCCACAG   | 1 | 103 | 103 | 1   | 100 Bm_ATCC23344_chr1 | 3510148 | 1726175 | 1726277 | 100 | 515 | 1.20E-18 - |
| BPSL2241 | acetyl-CoA carboxylase alpha subunit                  | 2703497 | 2704468 - | 323 | 53719850 | 3092968 accA | COG0825I            | GAGCTATTGCTTTTTCGTAATCGAT  | 1 | 103 | 103 | 1   | 100 Bm_ATCC23344_chr1 | 3510148 | 1729000 | 1729102 | 100 | 515 | 1.20E-18 - |
| BPSL2243 | cysteinyl-tRNA synthetase                             | 2705558 | 2706955 - | 465 | 53719852 | 3093095 cysS | COG0215J            | GAGGAAGCGCACGGCACGGCGCC    | 1 | 103 | 103 | 1   | 100 Bm_ATCC23344_chr1 | 3510148 | 1731487 | 1731589 | 100 | 515 | 1.20E-18 - |
| BPSL2244 | hypothetical protein BPSL2244                         | 2707244 | 2707909 + | 221 | 53719853 | 3093298 -    | NULL                | TTTTTTAGAATGGCTCGAGATATA   | 1 | 103 | 1   | 103 | 100 Bm_ATCC23344_chr1 | 3510148 | 1731678 | 1731780 | 100 | 515 | 1.20E-18 + |
| BPSL2245 | peptidyl-prolyl cis-trans isomerase A precursor       | 2707966 | 2708541 + | 191 | 53719854 | 3094185 ppiA | COG0652O            | CGCAATAGCGGGCGGGCGGGCGG    | 1 | 59  | 1   | 59  | 100 Bm_ATCC23344_chr1 | 3510148 | 1732444 | 1732502 | 100 | 295 | 1.00E-08 - |
| BPSL2246 | peptidyl-prolyl cis-trans isomerase B                 | 2708622 | 2709113 + | 163 | 53719855 | 3094186 ppiB | COG0652O            | GCGGGCCCGAGCCTCTCGCGCGGC   | 1 | 83  | 1   | 83  | 100 Bm_ATCC23344_chr1 | 3510148 | 1733076 | 1733158 | 100 | 415 | 3.80E-14 + |
| BPSL2247 | UDP-2,3-diacylglucosamine hydrolase                   | 2709177 | 2709938 - | 253 | 53719856 | 3094136 -    | COG2908S            | AGCTCGGCGGACGGGGGACGGGG    | 1 | 66  | 1   | 66  | 100 Bm_ATCC23344_chr1 | 3510148 | 1733648 | 1733713 | 100 | 330 | 2.60E-10 + |
| BPSL2248 | putative serine acetyltransferase                     | 2710271 | 2711056 - | 261 | 53719857 | 3094137 -    | COG1045E            | CGTCCGATGTCTAAGCAAAAGCTC   | 1 | 103 | 103 | 1   | 100 Bm_ATCC23344_chr1 | 3510148 | 1735591 | 1735693 | 100 | 515 | 1.20E-18 - |
| BPSL2249 | putative tRNA/rRNA methyltransferase protein          | 2711247 | 2712158 - | 303 | 53719858 | 3093206 -    | COG0565J            | AAACGGTTGCGGGGCGGTCGTGAT   | 1 | 103 | 103 | 1   | 100 Bm_ATCC23344_chr1 | 3510148 | 1736693 | 1736795 | 99  | 506 | 3.00E-18 - |
| BPSL2250 | inositol-1-monophosphatase                            | 2712459 | 2713262 + | 267 | 53719859 | 3092894 suhB | COG0483G            | CGAAACCGCCCGCTGGCGCCCTCTC  | 1 | 103 | 1   | 103 | 100 Bm_ATCC23344_chr1 | 3510148 | 1736896 | 1736998 | 100 | 515 | 1.20E-18 + |
| BPSL2251 | hypothetical protein BPSL2251                         | 2713542 | 2713814 - | 90  | 53719860 | 3093207 -    | NULL                | CACCTTCAGAAATGCCAATATCGTTH | 1 | 103 | 103 | 1   | 100 Bm_ATCC23344_chr1 | 3510148 | 1738349 | 1738451 | 100 | 515 | 1.20E-18 - |
| BPSL2252 | DNA mismatch repair protein                           | 2715154 | 2717826 + | 890 | 53719861 | 3094284 mutS | COG0249L            | CGGACCGAATCGACACATTTGGCCG  | 1 | 103 | 1   | 103 | 100 Bm_ATCC23344_chr1 | 3510148 | 1739593 | 1739695 | 100 | 515 | 1.20E-18 + |
| BPSL2254 | putative FkBP-type peptidyl-prolyl cis-trans isomeras | 2719091 | 2719636 - | 181 | 53719863 | 3091962 -    | COG1047O            | GCGCGCGCGAGTGGCTGTGGCGCAC  | 1 | 95  | 95  | 1   | 100 Bm_ATCC23344_chr1 | 3510148 | 1744175 | 1744269 | 100 | 475 | 7.40E-17 - |
| BPSL2255 | hypothetical protein BPSL2255                         | 2719729 | 2720892 + | 380 | 53719864 | 3092468 -    | COG2850S            | CCAATTCTCCCAAGTACAACAGCGCA | 1 | 95  | 1   | 95  | 100 Bm_ATCC23344_chr1 | 3510148 | 1744178 | 1744272 | 100 | 475 | 7.40E-17 + |
| BPSL2257 | putative lipoprotein                                  | 2722400 | 2723542 - | 387 | 53719867 | 3092580 -    | COG3317M            | GCGCGCCGGCGCGCTCGACCGCGA   | 1 | 103 | 103 | 1   | 100 Bm_ATCC23344_chr1 | 3510148 | 1748114 | 1748216 | 99  | 506 | 3.00E-18 - |
| BPSL2261 | hypothetical protein BPSL2261                         | 2726425 | 2727090 - | 221 | 53719871 | 3093628 -    | COG1994R            | GCGCGCCGCGCGCGCTCCCGCGCGCA | 1 | 101 | 101 | 1   | 100 Bm_ATCC23344_chr1 | 3510148 | 1751662 | 1751762 | 100 | 505 | 3.30E-18 - |
| BPSL2262 | hypothetical protein BPSL2262                         | 2727189 | 2727818 - | 209 | 53719872 | 3093629 -    | COG0009J            | GCGGCTTTGCGCGGCGCACTCCG    | 1 | 67  | 67  | 1   | 100 Bm_ATCC23344_chr1 | 3510148 | 1752390 | 1752456 | 100 | 335 | 1.60E-10 - |
| BPSL2263 | hypothetical protein BPSL2263                         | 2727883 | 2728722 - | 279 | 53719873 | 3093473 -    | COG0613R            | GGAAGGGCGAAGCGCGGGCGCGCG   | 1 | 103 | 103 | 1   | 100 Bm_ATCC23344_chr1 | 3510148 | 1753294 | 1753396 | 100 | 515 | 1.20E-18 - |
| BPSL2264 | putative hydrolase                                    | 2728968 | 2729858 - | 296 | 53719874 | 3094474 -    | COG0596R            | CTAGAGAAGATGTCTCGACACGGGT  | 1 | 103 | 103 | 1   | 100 Bm_ATCC23344_chr1 | 3510148 | 1754409 | 1754512 | 99  | 505 | 3.30E-18 - |
| BPSL2265 | hypothetical protein BPSL2265                         | 2730013 | 2730864 - | 283 | 53719875 | 3092946 -    | NULL                | CGTGTGGCTGCGCGCTGGATCGGT   | 1 | 103 | 103 | 1   | 100 Bm_ATCC23344_chr1 | 3510148 | 1755416 | 1755518 | 100 | 515 | 1.20E-18 - |
| BPSL2266 | hypothetical protein BPSL2266                         | 2731041 | 2731565 + | 174 | 53719876 | 3092947 -    | COG0663R            | CGCATCCAAAGCGGACGCCACCG    | 1 | 103 | 1   | 103 | 100 Bm_ATCC23344_chr1 | 3510148 | 1755495 | 1755597 | 100 | 515 | 1.20E-18 - |
| BPSL2268 | putative lipoprotein                                  | 2732638 | 2732985 + | 115 | 53719878 | 3094228 -    | NULL                | TCGCGCGCGCGCTCGTGGTGGCGG   | 1 | 86  | 1   | 86  | 100 Bm_ATCC23344_chr1 | 3510148 | 1757109 | 1757194 | 100 | 430 | 8.00E-15 + |
| BPSL2269 | cell division protein FtsB                            | 2733211 | 2733642 - | 143 | 53719879 | 3091612 ftsB | COG2919D            | CACGCGCTGACGGTCTACTATCGGT  | 1 | 94  | 94  | 1   | 100 Bm_ATCC23344_chr1 | 3510148 | 1758182 | 1758275 | 100 | 470 | 1.30E-16 - |
| BPSL2270 | phosphorylpyruvate hydratase                          | 2733734 | 2735017 - | 427 | 53719880 | 3091594 eno  | COG0148G            | ACTCGCGGCGCGTGAAGCGCGCTCA  | 1 | 103 | 103 | 1   | 100 Bm_ATCC23344_chr1 | 3510148 | 1759557 | 1759659 | 100 | 515 | 1.20E-18 - |
| BPSL2272 | CTP synthetase                                        | 2735972 | 2737633 - | 553 | 53719882 | 3091437 pyrG | COG0504F            | CGAGCGCGGACGGCGAAGGGAAG    | 1 | 103 | 103 | 1   | 100 Bm_ATCC23344_chr1 | 3510148 | 1762173 | 1762275 | 99  | 506 | 3.00E-18 - |
| BPSL2277 | putative lipoprotein releasing system transmembran    | 2742870 | 2744123 - | 417 | 53719887 | 3093214 -    | COG4591M            | TTAAGCATTTGTGGCACACTGTGCT  | 1 | 103 | 103 | 1   | 100 Bm_ATCC23344_chr1 | 3510148 | 1768663 | 1768765 | 100 | 515 | 1.20E-18 - |
| BPSL2278 | hypothetical protein BPSL2278                         | 2744691 | 2745767 + | 358 | 53719888 | 3092074 -    | COG4255S            | TTACCACGACGACCGCGCGCTCCAC  | 1 | 103 | 1   | 103 | 100 Bm_ATCC23344_chr1 | 3510148 | 1769137 | 1769239 | 97  | 488 | 1.90E-17 + |
| BPSL2280 | peptide chain release factor 2                        | 2747838 | 2748942 + | 367 | 53719890 | 3093204 supK | COG1186I            | CCCCCGCGCACGGCGCGCGCGCGC   | 1 | 103 | 1   | 103 | 100 Bm_ATCC23344_chr1 | 3510148 | 1772286 | 1772388 | 100 | 515 | 1.20E-18 - |
| BPSL2281 | lysyl-tRNA synthetase                                 | 2749035 | 2750561 + | 508 | 53719891 | 3092883 lysS | COG1190J            | CGCCCGCTTTCGCGCGGCGCGCGCG  | 1 | 95  | 1   | 95  | 100 Bm_ATCC23344_chr1 | 3510148 | 1773491 | 1773587 | 97  | 455 | 6.00E-16 + |
| BPSL2282 | hypothetical protein BPSL2282                         | 2750912 | 2751637 + | 241 | 53719892 | 3092259 -    | NULL                | CGCAGCGAATCGTTTACAACCTGAA  | 1 | 103 | 1   | 103 | 100 Bm_ATCC23344_chr1 | 3510148 | 1775371 | 1775473 | 100 | 515 | 1.20E-18 - |
| BPSL2284 | ferredoxin, 2Fe-2S                                    | 2752301 | 2752642 - | 113 | 53719894 | 3094860 fdx  | COG0633C            | ATACGACCGCGCGCGCGCGCGCGCA  | 1 | 95  | 95  | 1   | 100 Bm_ATCC23344_chr1 | 3510148 | 1777177 | 1777271 | 100 | 475 | 7.40E-17 - |
| BPSL2285 | chaperone protein HscA                                | 2752735 | 2754603 - | 622 | 53719895 | 3092392 hscA | COG0443O            | CGCGCGCTTATCGCACGGATGATG   | 1 | 60  | 60  | 1   | 100 Bm_ATCC23344_chr1 | 3510148 | 1779138 | 1779197 | 100 | 300 | 6.00E-09 - |
| BPSL2286 | co-chaperone HscB                                     | 2754661 | 2755188 - | 175 | 53719896 | 3094409 hscB | COG0107O            | CGGGGCGGCGCAAGAGCGGCGCGG   | 1 | 103 | 103 | 1   | 100 Bm_ATCC23344_chr1 | 3510148 | 1779731 | 1779833 | 100 | 515 | 1.20E-18 - |
| BPSL2287 | HesB family protein                                   | 2755301 | 2755624 - | 107 | 53719897 | 3094410 -    | COG0316S            | GCGGCGTCTCGGGTTGCAGCGACG   | 1 | 85  | 85  | 1   | 100 Bm_ATCC23344_chr1 | 3510148 | 1780167 | 1780251 | 98  | 416 | 3.40E-14 - |
| BPSL2288 | hypothetical protein BPSL2288                         | 2755707 | 2756114 - | 135 | 53719898 | 3092118 -    | COG0822C            | GCGCGCGGACTTTTTCGGGGGCGG   | 1 | 68  | 68  | 1   | 100 Bm_ATCC23344_chr1 | 3510148 | 1780657 | 1780724 | 100 | 340 | 9.30E-11 - |
| BPSL2289 | cysteine desulfurase                                  | 2756180 | 2757403 - | 407 | 53719899 | 3094249 iscS | COG1104E            | TGGCGCGGCACTGAACGGCGCGCG   | 1 | 71  | 71  | 1   | 100 Bm_ATCC23344_chr1 | 3510148 | 1781946 | 1782016 | 100 | 355 | 2.00E-11 - |
| BPSL2290 | hypothetical protein BPSL2290                         | 2757472 | 2758011 - | 179 | 53719900 | 3092119 -    | COG1959K            | GCGCGCGCATACACCCCTTTTAGCG  | 1 | 103 | 103 | 1   | 100 Bm_ATCC23344_chr1 | 3510148 | 1782554 | 1782656 | 99  | 506 | 3.00E-18 - |
| BPSL2291 | low molecular weight phosphotyrosine protein phos     | 2758113 | 2758592 - | 159 | 53719901 | 3091669 gln  | COG0394T            | GCGGCGACCCGGCGGCAAGCGGGAG  | 1 | 94  | 94  | 1   | 100 Bm_ATCC23344_chr1 | 3510148 | 1783135 | 1783228 | 100 | 470 | 1.30E-16 - |
| BPSL2292 | hypothetical protein BPSL2292                         | 2758684 | 2758944 - | 86  | 53719902 | 3091670 -    | NULL                | CTCGGCGCGGACTGTTTCATCGGGCG | 1 | 103 | 103 | 1   | 100 Bm_ATCC23344_chr1 | 3510148 | 1783487 | 1783589 | 100 | 515 | 1.20E-18 - |
| BPSL2293 | putative iron-sulfur binding protein                  | 2759055 | 2760506 - | 483 | 53719903 | 3093480 -    | COG1139C            | CGGGCCGCGCGCTCAGAGACAGCGA  | 1 | 103 | 103 | 2   | 99 Bm_ATCC23344_chr1  | 3510148 | 1785049 | 1785157 | 93  | 440 | 2.80E-15 - |
| BPSL2294 | hypothetical protein BPSL2294                         | 2760648 | 2761370 - | 240 | 53719904 | 3093481 -    | COG0247C            | GTCTCTCGTCTGATGCCGCGAAGCGG | 1 | 103 | 103 | 1   | 100 Bm_ATCC23344_chr1 | 3510148 | 1785920 | 1786022 | 100 | 515 | 1.20E-18 - |
| BPSL2295 | IdIR regulatory protein                               | 2761553 | 2762365 + | 270 | 53719905 | 3092232 -    | COG1414K            | GCGGCATCGAGCGAGACTCTCTCTC  | 1 | 103 | 1   | 103 | 100 Bm_ATCC23344_chr1 | 3510148 | 1786005 | 1786107 | 100 | 515 | 1.20E-18 + |
| BPSL2297 | family S11 unassigned peptidase                       | 2764077 | 2765156 - | 359 | 53719907 | 3091882 -    | COG1686M            | TATTTTTTCAGCTTTTACTACTCTTG | 1 | 103 | 1   | 103 | 100 Bm_ATCC23344_chr1 | 3510148 | 1789799 | 1789901 | 100 | 515 | 1.20E-18 + |
| BPSL2298 | phasin-like protein                                   | 2765868 | 2766437 + | 189 | 53719908 | 3093221 phaP | NULL                | GGAACATTGTTGGTGTGTCACAAAC  | 1 | 103 | 103 | 1   | 100 Bm_ATCC23344_chr1 | 3510148 | 1789185 | 1789287 | 100 | 515 | 1.20E-18 - |
| BPSL2299 | putative dihydrolipoamide dehydrogenase               | 2766719 | 2768488 - | 589 | 53719909 | 3091883 -    | COG1249C            | GATCTGCCAGATGTTCGGTCTCTTTG | 1 | 103 | 103 | 1   | 100 Bm_ATCC23344_chr1 | 3510148 | 1794585 | 1794687 | 100 | 515 | 1.20E-18 - |
| BPSL2301 | pyruvate dehydrogenase E1 component                   | 2770569 | 2773265 - | 898 | 53719911 | 3093625 pdhA | COG2609C            | CCCCGAACGCTCTTACAATCCGGCG  | 1 | 103 | 103 | 2   | 99 Bm_ATCC23344_chr1  | 3510148 | 1799311 | 1799412 | 99  | 501 | 5.00E-18 - |
| BPSL2302 | sensor kinase protein                                 | 2773508 | 2776048 + | 846 | 53719912 | 3093892 -    | COG0642T, COG2202T  | AAATGTGGAATATTGCTGGCGCGCAC | 1 | 103 | 1   | 103 | 100 Bm_ATCC23344_chr1 | 3510148 | 1799456 | 1799558 | 99  | 506 | 3.00E-18 + |
| BPSL2304 | FoId bifunctional protein                             | 2777000 | 2777857 + | 285 | 53719914 | 3094333 foId | COG0190H            | TCGGCTGACGACGAGCGGGCGGGTA  | 1 | 103 | 1   | 103 | 100 Bm_ATCC23344_chr1 | 3510148 | 1802948 | 1803050 | 100 | 515 | 1.20E-18 - |
| BPSL2305 | oligopeptidase A                                      | 2778566 | 2780665 + | 699 | 53719915 | 3093501 -    | COG0339E            | AGCGACGATGCGCGCGCAATAATG   | 1 | 103 | 1   | 103 | 100 Bm_ATCC23344_chr1 | 3510148 | 1804483 | 1804585 | 100 | 515 | 1.20E-18 + |
| BPSL2306 | DNA polymerase IV                                     | 2780897 | 2782117 - | 406 | 53719916 | 3093502 -    | COG0389L</          |                            |   |     |     |     |                       |         |         |         |     |     |            |

|          |                                                          |         |           |      |          |              |            |                             |   |     |     |     |                       |         |        |        |     |     |            |
|----------|----------------------------------------------------------|---------|-----------|------|----------|--------------|------------|-----------------------------|---|-----|-----|-----|-----------------------|---------|--------|--------|-----|-----|------------|
| BPSL2349 | putative DNA photolyase                                  | 2840120 | 2841580 - | 486  | 53719958 | 3093055 -    | COG0415L   | TCGTCCGCCGAGCGATTTCATCGCG   | 1 | 103 | 1   | 103 | 100 Bm_ATCC23344_chr1 | 3510148 | 663450 | 663552 | 99  | 506 | 3.00E-18 + |
| BPSL2350 | putative alkane monooxygenase                            | 2842000 | 2843166 + | 388  | 53719959 | 3092483 -    | NULL       | TCAGCGCAACGGCGGACGACCCGT    | 1 | 103 | 103 | 1   | 100 Bm_ATCC23344_chr1 | 3510148 | 663129 | 663231 | 100 | 515 | 1.20E-18 - |
| BPSL2351 | hypothetical protein BPSL2351                            | 2843904 | 2846192 + | 762  | 53719960 | 3092484 -    | COG3256P   | CTCAAAAACATATCTTTTGTACATC   | 1 | 103 | 103 | 1   | 100 Bm_ATCC23344_chr1 | 3510148 | 661241 | 661343 | 100 | 515 | 1.20E-18 - |
| BPSL2355 | hypothetical protein BPSL2355                            | 2847949 | 2849172 + | 407  | 53719962 | 3091952 -    | COG3213P   | CGCGGACAACGCCGCGCGCGGCA     | 1 | 103 | 103 | 1   | 100 Bm_ATCC23344_chr1 | 3510148 | 657205 | 657307 | 99  | 506 | 3.00E-18 - |
| BPSL2356 | anaerobic ribonucleoside triphosphate reductase          | 2849770 | 2851533 + | 587  | 53719963 | 3091953 -    | COG1328F   | CGCGTCAAACTTCGCCGGATCGCC    | 1 | 103 | 103 | 1   | 100 Bm_ATCC23344_chr1 | 3510148 | 655384 | 655486 | 99  | 506 | 3.00E-18 - |
| BPSL2360 | hypothetical protein BPSL2360                            | 2853220 | 2853699 - | 159  | 53719967 | 3091798 -    | COG3151A   | GGCGCGCGCGCGCGCGCGCGCGC     | 1 | 58  | 1   | 58  | 100 Bm_ATCC23344_chr1 | 3510148 | 651397 | 651452 | 94  | 251 | 9.80E-07 + |
| BPSL2362 | family U32 unassigned peptidase                          | 2854683 | 2855717 - | 344  | 53719969 | 3092168 -    | NULL       | CGCGCGCGCGCGCGCGCGCGCGC     | 1 | 91  | 1   | 91  | 100 Bm_ATCC23344_chr1 | 3510148 | 649346 | 649436 | 100 | 455 | 6.00E-16 + |
| BPSL2363 | putative 2-nitropropane dioxygenase                      | 2855806 | 2857023 - | 405  | 53719970 | 3092162 -    | COG2070R   | GGCATCCGGACCGACGACCTTGCCG   | 1 | 103 | 1   | 103 | 100 Bm_ATCC23344_chr1 | 3510148 | 648028 | 648130 | 99  | 506 | 3.00E-18 + |
| BPSL2364 | hypothetical protein BPSL2364                            | 2857243 | 2858559 + | 438  | 53719971 | 3092163 -    | NULL       | ATCAGAAATACGAAACATGGGTGTC   | 1 | 103 | 103 | 1   | 100 Bm_ATCC23344_chr1 | 3510148 | 647906 | 648008 | 99  | 506 | 3.00E-18 - |
| BPSL2366 | coproporphyrinogen III oxidase                           | 2859237 | 2860682 - | 481  | 53719973 | 3092079 -    | COG0635H   | CGCGCTCGGAGGTGATTGTGCATCA   | 1 | 103 | 1   | 103 | 100 Bm_ATCC23344_chr1 | 3510148 | 644369 | 644471 | 100 | 515 | 1.20E-18 + |
| BPSL2367 | putative methyl-accepting chemotaxis protein             | 2860837 | 2862759 - | 640  | 53719974 | 3091619 -    | COG0840NT  | CGTGATCGGATGATTGATCTTGCTT   | 1 | 103 | 1   | 103 | 100 Bm_ATCC23344_chr1 | 3510148 | 642292 | 642394 | 100 | 515 | 1.20E-18 - |
| BPSL2369 | hypothetical protein BPSL2369                            | 2864978 | 2866432 + | 484  | 53719976 | 3091762 -    | NULL       | CCATATACCAACATTAAGGCAACAC   | 1 | 103 | 103 | 1   | 100 Bm_ATCC23344_chr1 | 3510148 | 640171 | 640273 | 100 | 515 | 1.20E-18 - |
| BPSL2375 | hypothetical protein BPSL2375                            | 2871037 | 2871336 - | 99   | 53719982 | 3094281 -    | COG4309S   | CATGTGTGAAGCGCGGACGAGCCG    | 1 | 103 | 1   | 103 | 100 Bm_ATCC23344_chr1 | 3510148 | 633920 | 634022 | 99  | 506 | 3.00E-18 + |
| BPSL2376 | putative DNA-binding protein                             | 2871527 | 2872015 + | 162  | 53719983 | 3094282 -    | COG1959K   | TTGCAACATCGCAGCGGTAAACATA   | 1 | 103 | 103 | 1   | 100 Bm_ATCC23344_chr1 | 3510148 | 633827 | 633929 | 98  | 497 | 7.60E-18 - |
| BPSL2378 | ubiquinol oxidase polypeptide II precursor               | 2873037 | 2873927 + | 296  | 53719985 | 3092531 cyoA | COG1622C   | CTACATTCCGCCGCCAAGCGGACTC   | 1 | 103 | 103 | 1   | 100 Bm_ATCC23344_chr1 | 3510148 | 632297 | 632399 | 98  | 497 | 7.60E-18 - |
| BPSL2383 | putative histidine-binding periplasmic protein precursor | 2878543 | 2879337 + | 264  | 53719990 | 3091630 -    | COG0834ET  | ACGGCGCGCGCGCGCGGCTGTCCG    | 1 | 103 | 1   | 103 | 100 Bm_ATCC23344_chr1 | 3510148 | 625922 | 626024 | 99  | 506 | 3.00E-18 - |
| BPSL2390 | bifunctional N-succinyladiminopimelate-aminotransferase  | 2886121 | 2887353 - | 410  | 53719996 | 3093428 argD | COG4992E   | GAAACCCCGCTCGGCAATAATCCGTCC | 1 | 103 | 1   | 103 | 100 Bm_ATCC23344_chr1 | 3510148 | 617910 | 618012 | 100 | 515 | 1.20E-18 + |
| BPSL2398 | hypothetical protein BPSL2398                            | 2894877 | 2896298 - | 473  | 53720004 | 3092192 -    | COG1032C   | CTCATACACAGGATGCGCGCGGCGG   | 1 | 103 | 103 | 1   | 100 Bm_ATCC23344_chr1 | 3510148 | 604129 | 604231 | 100 | 515 | 1.20E-18 - |
| BPSL2399 | putative glycosyltransferase                             | 2896410 | 2897591 - | 393  | 53720005 | 3092193 -    | COG1215M   | AAGCAAGTCAGAAAGGATTTGGGA    | 1 | 103 | 103 | 1   | 100 Bm_ATCC23344_chr1 | 3510148 | 605419 | 605521 | 100 | 515 | 1.20E-18 - |
| BPSL2400 | luciferase-like monooxygenase                            | 2898218 | 2899276 + | 352  | 53720006 | 3094285 -    | COG2141C   | GTCTGTCAGGATATCCATCCGGGCC   | 1 | 103 | 1   | 103 | 100 Bm_ATCC23344_chr1 | 3510148 | 605948 | 606050 | 100 | 515 | 1.20E-18 + |
| BPSL2402 | pyridoxamine kinase                                      | 2901316 | 2902179 + | 287  | 53720008 | 3094845 pdxY | COG2240H   | CCCTCCGATACCGTATTACCGGATG   | 1 | 103 | 1   | 103 | 100 Bm_ATCC23344_chr1 | 3510148 | 608993 | 609095 | 100 | 515 | 1.20E-18 + |
| BPSL2403 | non-hemolytic phospholipase C precursor                  | 2902870 | 2904972 + | 700  | 53720009 | 3093316 plcN | NULL       | GGCGCTCGCGCGGCAAGCGCGGACG   | 1 | 103 | 1   | 103 | 100 Bm_ATCC23344_chr1 | 3510148 | 610526 | 610628 | 100 | 515 | 1.20E-18 + |
| BPSL2404 | periplasmic lipid binding lipoprotein                    | 2905792 | 2906940 + | 382  | 53720010 | 3094724 -    | COG0683E   | AGCGCGCGCGCGCTCCGCGCGCGCG   | 1 | 103 | 103 | 1   | 100 Bm_ATCC23344_chr1 | 3510148 | 598799 | 598901 | 100 | 515 | 1.20E-18 - |
| BPSL2405 | putative FAD dependent oxidoreductase                    | 2907039 | 2908211 + | 390  | 53720011 | 3093338 -    | COG0665E   | CGCGCGCGCCATGTATGGAGCGGA    | 1 | 101 | 101 | 1   | 100 Bm_ATCC23344_chr1 | 3510148 | 597552 | 597652 | 99  | 496 | 8.40E-18 - |
| BPSL2406 | hypothetical protein BPSL2406                            | 2908367 | 2908828 - | 153  | 53720012 | 3093339 -    | COG3556S   | CGCGCGCGCGCGCGCGCGCGCGC     | 1 | 58  | 1   | 58  | 100 Bm_ATCC23344_chr1 | 3510148 | 595762 | 595819 | 100 | 290 | 1.70E-08 + |
| BPSL2407 | hypothetical protein BPSL2407                            | 2908884 | 2909855 - | 323  | 53720013 | 3091904 -    | NULL       | CGCCGATTTCGGCGCTGGGGCATC    | 1 | 103 | 1   | 103 | 100 Bm_ATCC23344_chr1 | 3510148 | 594729 | 594831 | 100 | 515 | 1.20E-18 + |
| BPSL2408 | glycosyl transferase group 1 protein                     | 2910122 | 2911186 - | 354  | 53720014 | 3091905 -    | COG0438M   | AGCGCGCTCGCGCGAGCTCAACCI    | 1 | 103 | 1   | 103 | 100 Bm_ATCC23344_chr1 | 3510148 | 593398 | 593500 | 100 | 515 | 1.20E-18 - |
| BPSL2409 | ABC transporter ATP binding protein                      | 2911753 | 2913618 + | 621  | 53720015 | 3092643 -    | COG1132V   | CGCGCAGCGACCGGCTTGATTACAA   | 1 | 103 | 103 | 1   | 100 Bm_ATCC23344_chr1 | 3510148 | 592931 | 593033 | 100 | 515 | 1.20E-18 - |
| BPSL2411 | putative trehalose-phosphatase                           | 2915053 | 2915862 - | 269  | 53720017 | 3093035 otsB | COG1877G   | ACCCGCGACCGAACCGGGGCAAA     | 1 | 103 | 1   | 103 | 100 Bm_ATCC23344_chr1 | 3510148 | 588724 | 588826 | 99  | 506 | 3.00E-18 + |
| BPSL2412 | SCO1/SenC family protein                                 | 2916222 | 2916881 + | 219  | 53720018 | 3092644 -    | COG1999R   | CGATCGCTCTGGATCGATCGCGG     | 1 | 103 | 103 | 1   | 100 Bm_ATCC23344_chr1 | 3510148 | 588462 | 588564 | 100 | 515 | 1.20E-18 - |
| BPSL2415 | hypothetical protein BPSL2415                            | 2918372 | 2918875 - | 167  | 53720021 | 3093269 -    | COG2153R   | GGCGCAGCGCGCGCGCGCTTCGGT    | 1 | 103 | 1   | 103 | 100 Bm_ATCC23344_chr1 | 3510148 | 585712 | 585814 | 99  | 506 | 3.00E-18 + |
| BPSL2416 | hypothetical protein BPSL2416                            | 2919089 | 2919955 - | 288  | 53720022 | 3093270 -    | COG1741R   | TGAGTGTGATTTTCGGGCTCTACTG   | 1 | 103 | 1   | 103 | 100 Bm_ATCC23344_chr1 | 3510148 | 584612 | 584714 | 100 | 515 | 1.20E-18 - |
| BPSL2417 | LysR family regulatory protein                           | 2920082 | 2920990 + | 302  | 53720023 | 3093640 -    | COG0583K   | AGCGAACCGTCTGCATGATGGGATA   | 1 | 103 | 103 | 1   | 100 Bm_ATCC23344_chr1 | 3510148 | 584583 | 584685 | 100 | 515 | 1.20E-18 - |
| BPSL2418 | hypothetical protein BPSL2418                            | 2921155 | 2921667 + | 170  | 53720024 | 3093641 -    | COG1956T   | CGCCATCGCGCGGACGCGCGCGCGC   | 1 | 103 | 103 | 1   | 100 Bm_ATCC23344_chr1 | 3510148 | 583508 | 583610 | 99  | 506 | 3.00E-18 - |
| BPSL2419 | putative CDP-diacylglycerol--glycerol-3-phosphate 3      | 2923370 | 2923963 - | 197  | 53720025 | 3092636 -    | COG0558I   | CGCGGCTCGCGCGCGCGCGCGCGC    | 1 | 103 | 1   | 103 | 100 Bm_ATCC23344_chr1 | 3510148 | 580594 | 580696 | 100 | 515 | 1.20E-18 + |
| BPSL2422 | elongation factor P                                      | 2927947 | 2928504 + | 185  | 53720028 | 3092950 -    | COG0231Q   | CGCGCGCTCGGCTCGCGCGGCTCG    | 1 | 103 | 103 | 1   | 100 Bm_ATCC23344_chr1 | 3510148 | 576687 | 576789 | 99  | 506 | 3.00E-18 - |
| BPSL2423 | sigma-54 interacting response regulator protein          | 2928775 | 2930172 + | 465  | 53720029 | 3092540 -    | COG2204T   | ACGCCAAGTCGCGGATGGGCGGATA   | 1 | 103 | 103 | 1   | 100 Bm_ATCC23344_chr1 | 3510148 | 575859 | 575961 | 100 | 515 | 1.20E-18 - |
| BPSL2428 | GTP-binding protein Era                                  | 2933396 | 2934295 - | 299  | 53720034 | 3093107 era  | COG1159R   | CATCGTCCCAATGCACATCGCGGTC   | 1 | 72  | 1   | 72  | 100 Bm_ATCC23344_chr1 | 3510148 | 570272 | 570343 | 100 | 360 | 1.20E-11 + |
| BPSL2429 | ribonuclease III                                         | 2934365 | 2935768 - | 467  | 53720035 | 3092548 rnc  | COG0571K   | CGCACTACTTTAAGAACCGGGCGG    | 1 | 103 | 1   | 103 | 100 Bm_ATCC23344_chr1 | 3510148 | 568768 | 568870 | 100 | 515 | 1.20E-18 - |
| BPSL2431 | GTP-binding protein LepA                                 | 2936828 | 2938621 - | 597  | 53720037 | 3091676 lepA | COG0481M   | CTTGCGCGCGCTTTTCGGGTCAAA    | 1 | 103 | 1   | 103 | 100 Bm_ATCC23344_chr1 | 3510148 | 565915 | 566017 | 100 | 515 | 1.20E-18 + |
| BPSL2433 | subfamily S1C unassigned peptidase                       | 2939113 | 2940570 - | 485  | 53720039 | 3094614 -    | COG0265O   | CCCTTCGGTTCCGCATGATGAAT     | 1 | 70  | 1   | 70  | 100 Bm_ATCC23344_chr1 | 3510148 | 563999 | 564068 | 100 | 350 | 3.30E-11 + |
| BPSL2435 | putative sigma E factor negative regulatory protein      | 2941696 | 2942298 - | 200  | 53720041 | 3092492 -    | COG3073T   | GGCGCTCGCGGGAATCGAAGCGGCG   | 1 | 86  | 1   | 86  | 100 Bm_ATCC23344_chr1 | 3510148 | 562255 | 562340 | 100 | 430 | 8.00E-15 + |
| BPSL2436 | RNA polymerase sigma-70 factor                           | 2942382 | 2942981 - | 199  | 53720042 | 3092349 rpoE | COG1595K   | CGCGCGCAGCGCGCTTCGGGTGCA    | 1 | 103 | 1   | 103 | 100 Bm_ATCC23344_chr1 | 3510148 | 561555 | 561657 | 100 | 515 | 1.20E-18 - |
| BPSL2438 | 3-oxoacyl-(acyl carrier protein) synthase                | 2943572 | 2944810 - | 412  | 53720044 | 3092217 fabF | COG0304IQ  | CGGTTCTCGCGCGCGGACGATCAAC   | 1 | 103 | 1   | 103 | 100 Bm_ATCC23344_chr1 | 3510148 | 559726 | 559828 | 100 | 515 | 1.20E-18 + |
| BPSL2439 | acyl carrier protein                                     | 2944967 | 2945206 - | 79   | 53720045 | 3092505 acpP | COG0236IQ  | TCGGCGCATGTTTGCGCGCAAGGCG   | 1 | 103 | 1   | 103 | 100 Bm_ATCC23344_chr1 | 3510148 | 559330 | 559432 | 100 | 515 | 1.20E-18 - |
| BPSL2440 | 3-ketoacyl-(acyl-carrier-protein) reductase              | 2945350 | 2946099 - | 249  | 53720046 | 3091516 fabG | COG1028QR  | CGCGCTCAGCGCGGACGCTTGCCG    | 1 | 53  | 1   | 53  | 100 Bm_ATCC23344_chr1 | 3510148 | 558487 | 558539 | 100 | 265 | 2.30E-07 + |
| BPSL2441 | acyl-carrier-protein S-malonyltransferase                | 2946150 | 2947082 - | 310  | 53720047 | 3092873 fabD | COG0331I   | CGGCGCTCTTCGCGATCCGATGGCG   | 1 | 73  | 1   | 73  | 100 Bm_ATCC23344_chr1 | 3510148 | 557484 | 557556 | 100 | 365 | 6.90E-12 + |
| BPSL2443 | fatty acid/phospholipid synthesis protein                | 2948142 | 2949248 - | 368  | 53720049 | 3094277 -    | COG0416I   | GGCAGCTCGCGCGACACCGGTTTC    | 1 | 103 | 1   | 103 | 100 Bm_ATCC23344_chr1 | 3510148 | 555289 | 555390 | 98  | 491 | 1.40E-17 + |
| BPSL2444 | 50S ribosomal protein L32                                | 2949388 | 2949567 - | 59   | 53720050 | 3092457 rpmF | COG0333J   | GCAAGTTGGGCGCGGGAAGCGGTC    | 1 | 99  | 1   | 99  | 100 Bm_ATCC23344_chr1 | 3510148 | 554974 | 555072 | 100 | 495 | 9.30E-18 + |
| BPSL2445 | hypothetical protein BPSL2445                            | 2949664 | 2950296 - | 210  | 53720051 | 3094278 -    | COG1399R   | TTTTTCATCGGACGGGTTTTCGGG    | 1 | 103 | 2   | 103 | 99 Bm_ATCC23344_chr1  | 3510148 | 554242 | 554343 | 98  | 492 | 1.30E-17 + |
| BPSL2446 | Maf-like protein                                         | 2950540 | 2951187 + | 215  | 53720052 | 3092699 maf  | COG0424D   | GGCCTCGCAGGACGCGCGCGCGCC    | 1 | 103 | 103 | 1   | 100 Bm_ATCC23344_chr1 | 3510148 | 554095 | 554197 | 99  | 506 | 3.00E-18 - |
| BPSL2451 | ribosomal large subunit pseudouridine synthase C         | 2954013 | 2955020 - | 335  | 53720057 | 3094628 rluC | COG0564J   | AAGTAAAAATACAGTTTGCCTTCCG   | 1 | 103 | 3   | 103 | 98 Bm_ATCC23344_chr1  | 3510148 | 549883 | 549983 | 99  | 496 | 8.40E-18 - |
| BPSL2452 | putative ribonuclease E                                  | 2955743 | 2959009 + | 1088 | 53720058 | 3091436 -    | COG1530J   | AGCGTGCTTGTCGACACCAACAAAC   | 1 | 103 | 103 | 1   | 100 Bm_ATCC23344_chr1 | 3510148 | 549215 | 549317 | 100 | 515 | 1.20E-18 - |
| BPSL2459 | 2-hydroxyacid dehydrogenase                              | 2964859 | 2965848 - | 329  | 53720065 | 3091694 -    | COG1052CHR | CGCGCGCACGGGCGATCGCGCGGC    | 1 | 68  | 1   | 68  | 100 Bm_ATCC           |         |        |        |     |     |            |

|          |                                                    |         |           |     |          |              |                    |                            |   |     |     |     |                       |         |         |         |     |     |            |
|----------|----------------------------------------------------|---------|-----------|-----|----------|--------------|--------------------|----------------------------|---|-----|-----|-----|-----------------------|---------|---------|---------|-----|-----|------------|
| BPSL2495 | hypothetical protein BPSL2495                      | 3007371 | 3008528 - | 385 | 53720104 | 3092450 -    | COG1533L           | GCGGGGCCGAAGCGCTTGGCAGCA   | 1 | 103 | 103 | 1   | 100 Bm_ATCC23344_chr1 | 3510148 | 429785  | 429887  | 100 | 515 | 1.20E-18 - |
| BPSL2496 | leucine-responsive regulatory protein              | 3008637 | 3009125 - | 162 | 53720105 | 3092406 lrp  | COG1522K           | TGGCGCTCTCGGATCTCGATCCGACC | 1 | 103 | 103 | 1   | 100 Bm_ATCC23344_chr1 | 3510148 | 430382  | 430484  | 100 | 515 | 1.20E-18 - |
| BPSL2497 | D-amino acid dehydrogenase small subunit           | 3009273 | 3010559 + | 428 | 53720106 | 3091489 daaA | COG0665E           | CTCAACCATACCATAGCCGCAAAA   | 1 | 103 | 1   | 103 | 100 Bm_ATCC23344_chr1 | 3510148 | 430432  | 430534  | 100 | 515 | 1.20E-18 + |
| BPSL2498 | putative acyl-CoA dehydrogenase                    | 3010673 | 3012463 - | 596 | 53720107 | 3092451 -    | COG1960I           | CGGGCGCGCTCGGCTTCAGCGCAC   | 1 | 103 | 103 | 1   | 100 Bm_ATCC23344_chr1 | 3510148 | 433719  | 433820  | 99  | 500 | 5.50E-18 - |
| BPSL2500 | electron transfer flavoprotein beta-subunit        | 3013528 | 3014277 - | 249 | 53720109 | 3091793 etfB | COG2086C           | CTCGGTTGCAGCGCGCAATTAAGATG | 1 | 103 | 103 | 1   | 100 Bm_ATCC23344_chr1 | 3510148 | 435532  | 435634  | 100 | 515 | 1.20E-18 - |
| BPSL2501 | hypothetical protein BPSL2501                      | 3014504 | 3015298 - | 264 | 53720110 | 3092463 -    | COG1464P           | GAAAGACCATCGAAGACGCGACGAGC | 1 | 76  | 76  | 1   | 100 Bm_ATCC23344_chr1 | 3510148 | 436553  | 436628  | 100 | 380 | 1.50E-12 - |
| BPSL2503 | ABC transporter, ATP-binding component             | 3016015 | 3017049 - | 344 | 53720112 | 3092979 -    | COG1135P           | ATTGTGGCGAATCGGTTAAACTCGCG | 1 | 103 | 103 | 1   | 100 Bm_ATCC23344_chr1 | 3510148 | 438304  | 438406  | 100 | 515 | 1.20E-18 - |
| BPSL2504 | putative hydrolase                                 | 3017358 | 3018200 + | 280 | 53720113 | 3092980 -    | COG2267I           | TTGTGCACGACACGCCACGGAGACI  | 1 | 103 | 1   | 103 | 100 Bm_ATCC23344_chr1 | 3510148 | 438515  | 438617  | 100 | 515 | 1.20E-18 + |
| BPSL2505 | putative histone deacetylase-family protein        | 3018543 | 3019466 - | 307 | 53720114 | 3094456 -    | NULL               | GTGATGTGTGTAAGTTAGCGGCGCAI | 1 | 103 | 103 | 1   | 100 Bm_ATCC23344_chr1 | 3510148 | 440721  | 440823  | 100 | 515 | 1.20E-18 - |
| BPSL2506 | putative exported transglycosylase                 | 3019594 | 3020946 + | 450 | 53720115 | 3094457 -    | COG2951M           | GCGCCGACGTTCTCCGTCAAGGATI  | 1 | 103 | 1   | 103 | 100 Bm_ATCC23344_chr1 | 3510148 | 440751  | 440853  | 100 | 515 | 1.20E-18 + |
| BPSL2507 | cysteine synthase                                  | 3021173 | 3022075 - | 300 | 53720116 | 3092757 cysM | COG0031E           | CCGGGGCGCTCGGCGGCGGGCTGTG  | 1 | 103 | 103 | 1   | 100 Bm_ATCC23344_chr1 | 3510148 | 443323  | 443426  | 99  | 505 | 3.30E-18 - |
| BPSL2508 | hypothetical protein BPSL2508                      | 3022411 | 3022728 - | 105 | 53720118 | 3093097 -    | COG1555L           | GCGGCGCGCGCGCGCCTTAGACT    | 1 | 74  | 74  | 1   | 100 Bm_ATCC23344_chr1 | 3510148 | 443964  | 444037  | 100 | 370 | 4.10E-12 - |
| BPSL2509 | putative ADP-glycero-mannoheptose epimerase        | 3022800 | 3023792 - | 330 | 53720119 | 3092933 gmhD | COG0451MG          | ACGACAGCGCGCGCGCCGCCCGG    | 1 | 61  | 61  | 1   | 100 Bm_ATCC23344_chr1 | 3510148 | 445028  | 445088  | 100 | 305 | 3.60E-09 - |
| BPSL2511 | putative UDP-glucose dehydrogenase                 | 3024806 | 3026206 - | 466 | 53720121 | 3093002 udg  | COG1004M           | AATGAAGCGGTAAATGAGCGAGGCC  | 1 | 103 | 103 | 1   | 100 Bm_ATCC23344_chr1 | 3510148 | 447442  | 447544  | 100 | 515 | 1.20E-18 - |
| BPSL2512 | hypothetical protein BPSL2512                      | 3026327 | 3027496 - | 389 | 53720122 | 3093004 -    | COG2956G           | CGATGCCGACGCGCGCGCGCCGCG   | 1 | 55  | 55  | 1   | 100 Bm_ATCC23344_chr1 | 3510148 | 448732  | 448786  | 100 | 275 | 8.00E-08 - |
| BPSL2515 | 30S ribosomal protein S1                           | 3028413 | 3030125 - | 570 | 53720125 | 3093073 rpsA | COG0539P           | CGTGTGTTAAACCTTCTAACCCCGTG | 1 | 103 | 103 | 1   | 100 Bm_ATCC23344_chr1 | 3510148 | 452954  | 453056  | 100 | 515 | 1.20E-18 - |
| BPSL2519 | phosphoserine aminotransferase                     | 3034582 | 3035664 - | 360 | 53720129 | 3094241 serC | COG1932HE          | GATAAATGGCGGCTTTGGCGGACAGC | 1 | 103 | 103 | 1   | 100 Bm_ATCC23344_chr1 | 3510148 | 458431  | 458533  | 100 | 515 | 1.20E-18 - |
| BPSL2520 | hypothetical protein BPSL2520                      | 3035838 | 3036434 - | 198 | 53720130 | 3092000 -    | NULL               | GTCAGGTTGTGACCGCTCGAGCCGGI | 1 | 101 | 101 | 1   | 100 Bm_ATCC23344_chr1 | 3510148 | 459201  | 459301  | 100 | 505 | 3.30E-18 - |
| BPSL2521 | DNA gyrase subunit A                               | 3036533 | 3039133 - | 866 | 53720131 | 3092481 gyrA | COG0188L           | TGGGCGGGTTTGGGCGCGATGTTA   | 1 | 103 | 103 | 1   | 100 Bm_ATCC23344_chr1 | 3510148 | 461900  | 462002  | 100 | 515 | 1.20E-18 - |
| BPSL2522 | outer membrane protein a precursor                 | 3039644 | 3040318 + | 224 | 53720132 | 3093812 ompA | COG2885M           | TTTGTGCCGACCAATGTTATACTTC  | 1 | 103 | 1   | 103 | 100 Bm_ATCC23344_chr1 | 3510148 | 462313  | 462415  | 100 | 515 | 1.20E-18 + |
| BPSL2523 | 3-demethylubiquinone-9 3-methyltransferase         | 3040487 | 3041185 + | 232 | 53720133 | 3094669 ubiG | COG2227H           | CTCACCCGCGCGCGGCTTCTGGCK   | 1 | 103 | 1   | 103 | 100 Bm_ATCC23344_chr1 | 3510148 | 463156  | 463258  | 100 | 515 | 1.20E-18 - |
| BPSL2525 | hypothetical protein BPSL2525                      | 3042586 | 3043272 + | 228 | 53720135 | 3094167 -    | COG3963I           | GCGCGAGCGCAACATAGCCGGTAA   | 1 | 103 | 1   | 103 | 100 Bm_ATCC23344_chr1 | 3510148 | 467698  | 467800  | 100 | 515 | 1.20E-18 + |
| BPSL2526 | hypothetical protein BPSL2526                      | 3043453 | 3043716 - | 87  | 53720136 | 3094168 -    | NULL               | GAAACGGGCGGGCGGACGGGCTCT   | 1 | 103 | 103 | 1   | 100 Bm_ATCC23344_chr1 | 3510148 | 468926  | 469028  | 100 | 515 | 1.20E-18 - |
| BPSL2527 | possible regulatory protein                        | 3043818 | 3044924 - | 368 | 53720137 | 3093218 -    | COG1910P, COG2005R | ATAGAGCGCAAAAGCGACCTTGAGA  | 1 | 91  | 91  | 1   | 100 Bm_ATCC23344_chr1 | 3510148 | 470134  | 470224  | 100 | 455 | 6.00E-16 - |
| BPSL2528 | NAD-dependent formate dehydrogenase gamma sul      | 3045013 | 3045528 + | 171 | 53720138 | 3091500 fdsG | COG1905C           | TTATGCAATTCCGTTTCTATTTCGGA | 1 | 91  | 1   | 91  | 100 Bm_ATCC23344_chr1 | 3510148 | 470137  | 470227  | 100 | 455 | 6.00E-16 + |
| BPSL2532 | putative oxygenase                                 | 3050669 | 3052336 - | 555 | 53720142 | 3093219 -    | COG0654HC          | CGATACCTCGAAACCGCGCGCGCGC  | 1 | 103 | 103 | 1   | 100 Bm_ATCC23344_chr1 | 3510148 | 477580  | 477682  | 100 | 515 | 1.20E-18 - |
| BPSL2533 | hypothetical protein BPSL2533                      | 3053003 | 3054313 + | 436 | 53720143 | 3093173 -    | COG0457R           | CGCGCTCAACGCGCTCGGCGCGGCA  | 1 | 103 | 1   | 103 | 100 Bm_ATCC23344_chr1 | 3510148 | 478149  | 478251  | 100 | 515 | 1.20E-18 - |
| BPSL2534 | citrate-proton symporter                           | 3054702 | 3055997 - | 431 | 53720144 | 3092760 citA | NULL               | TCGCTCTCGCGGGGCGCGCGCGCG   | 1 | 103 | 103 | 1   | 100 Bm_ATCC23344_chr1 | 3510148 | 481241  | 481343  | 99  | 506 | 3.00E-18 - |
| BPSL2536 | amidase                                            | 3058425 | 3059801 + | 458 | 53720146 | 3094608 -    | NULL               | CTACAATGCGCGAAACGGCGCGCGC  | 1 | 103 | 1   | 103 | 100 Bm_ATCC23344_chr1 | 3510148 | 483569  | 483671  | 100 | 515 | 1.20E-18 + |
| BPSL2537 | disulfide bond formation protein B                 | 3059910 | 3060419 + | 169 | 53720147 | 3093150 dsbB | COG1495O           | CACCCCGCGCGCGGATCGCGCGCGC  | 1 | 103 | 1   | 103 | 100 Bm_ATCC23344_chr1 | 3510148 | 485054  | 485156  | 100 | 515 | 1.20E-18 - |
| BPSL2538 | hypothetical protein BPSL2538                      | 3060961 | 3061983 + | 340 | 53720148 | 3094609 -    | COG1975O           | GAGCTCTCGATCGCGCGCCGCCGCG  | 1 | 103 | 1   | 103 | 100 Bm_ATCC23344_chr1 | 3510148 | 486072  | 486174  | 98  | 497 | 7.60E-18 + |
| BPSL2540 | hypothetical protein BPSL2540                      | 3063112 | 3064524 + | 470 | 53720150 | 3093934 -    | COG2252R           | GCGCGCGCGCAACGCGCGCGCGCTC  | 1 | 64  | 1   | 61  | 100 Bm_ATCC23344_chr1 | 3510148 | 488262  | 488321  | 96  | 281 | 4.30E-08 + |
| BPSL2542 | hypothetical protein BPSL2542                      | 3066348 | 3066920 + | 190 | 53720152 | 3093935 -    | COG2119S           | CAGGGCTCTGGGAGACGCGATGGTT  | 1 | 103 | 1   | 103 | 100 Bm_ATCC23344_chr1 | 3510148 | 491449  | 491551  | 100 | 515 | 1.20E-18 + |
| BPSL2543 | putative lipoprotein                               | 3067254 | 3067967 - | 237 | 53720153 | 3094775 -    | NULL               | GTCTTCTCATATCGGCGCGGCGGTT  | 1 | 103 | 103 | 1   | 100 Bm_ATCC23344_chr1 | 3510148 | 493166  | 493268  | 100 | 515 | 1.20E-18 - |
| BPSL2544 | alanyl aminopeptidase                              | 3068188 | 3070890 + | 900 | 53720154 | 3094776 -    | COG0308E           | TCGTCGCGCGCGCTTGGCGCAAGA   | 1 | 103 | 1   | 103 | 100 Bm_ATCC23344_chr1 | 3510148 | 493289  | 493391  | 100 | 515 | 1.20E-18 + |
| BPSL2545 | 5-methyltetrahydropteroyltryglutamate--homocystein | 3071238 | 3073532 - | 764 | 53720155 | 3092004 metE | COG0620E           | GCGAATGATATTGAAAAAAATTCAT  | 1 | 103 | 103 | 1   | 100 Bm_ATCC23344_chr1 | 3510148 | 498731  | 498833  | 100 | 515 | 1.20E-18 - |
| BPSL2546 | transcriptional activator protein                  | 3073649 | 3074581 + | 310 | 53720156 | 3091761 metR | COG0583K           | TGACCGCGCATCTCGAATTGGCCCT  | 1 | 103 | 1   | 103 | 100 Bm_ATCC23344_chr1 | 3510148 | 498750  | 498852  | 100 | 515 | 1.20E-18 + |
| BPSL2547 | fructose-1,6-bisphosphatase                        | 3074711 | 3075727 + | 338 | 53720157 | 3092110 fbp  | COG0158G           | TTTTCCCGGAAAAACCGTCGCGCGC  | 1 | 103 | 1   | 103 | 100 Bm_ATCC23344_chr1 | 3510148 | 499812  | 499914  | 100 | 515 | 1.20E-18 + |
| BPSL2548 | hypothetical protein BPSL2548                      | 3076607 | 3077083 + | 158 | 53720159 | 3094092 -    | NULL               | AGCCGCGCTACGGGAGGATCCATCG  | 1 | 103 | 1   | 103 | 100 Bm_ATCC23344_chr1 | 3510148 | 503021  | 503123  | 100 | 515 | 1.20E-18 - |
| BPSL2549 | hypothetical protein BPSL2549                      | 3077252 | 3077500 + | 82  | 53720160 | 3094250 -    | NULL               | TCCTTCGGTATCCGGGATCAATTGTT | 1 | 103 | 1   | 103 | 100 Bm_ATCC23344_chr1 | 3510148 | 503666  | 503768  | 100 | 515 | 1.20E-18 + |
| BPSL2550 | hypothetical protein BPSL2550                      | 3078156 | 3078503 + | 115 | 53720161 | 3094251 -    | NULL               | TACGACACATGAAATTCGTTGCAGCA | 1 | 103 | 1   | 103 | 100 Bm_ATCC23344_chr1 | 3510148 | 504572  | 504674  | 99  | 506 | 3.00E-18 - |
| BPSL2553 | putative siderophore receptor protein              | 3080543 | 3082879 - | 778 | 53720164 | 3093253 -    | COG1629P           | CAGCGACGTGCGCGGCTCGCGCGGCT | 1 | 103 | 103 | 1   | 100 Bm_ATCC23344_chr1 | 3510148 | 509384  | 509486  | 100 | 515 | 1.20E-18 - |
| BPSL2554 | hypothetical protein BPSL2554                      | 3083026 | 3083502 - | 158 | 53720165 | 3092254 -    | NULL               | AGTGATTATCGAACGCAAACTTTTGC | 1 | 103 | 103 | 1   | 100 Bm_ATCC23344_chr1 | 3510148 | 510007  | 510109  | 99  | 506 | 3.00E-18 - |
| BPSL2555 | chorismate mutase                                  | 3084028 | 3084621 + | 197 | 53720166 | 3092729 -    | COG1605E           | TGATCTTCGCTTGGCGCGCGCGCGC  | 1 | 103 | 1   | 103 | 100 Bm_ATCC23344_chr1 | 3510148 | 510435  | 510537  | 100 | 515 | 1.20E-18 + |
| BPSL2559 | outer membrane porin protein                       | 3087604 | 3088743 + | 379 | 53720170 | 3092648 -    | COG3203M           | CGAGCCATCGCCCGGGCTCGTTTCT  | 1 | 103 | 1   | 103 | 100 Bm_ATCC23344_chr1 | 3510148 | 2181422 | 2181524 | 100 | 515 | 1.20E-18 + |
| BPSL2560 | transcription elongation factor GreB               | 3088971 | 3089534 - | 187 | 53720171 | 3094279 greB | COG0782K           | ATAGACGCAAAATTTAAAGGGGAG   | 1 | 103 | 103 | 1   | 100 Bm_ATCC23344_chr1 | 3510148 | 2184763 | 2184865 | 100 | 515 | 1.20E-18 - |
| BPSL2561 | guanosine-3',5'-bis(diphosphate) 3'-pyrophosphohyd | 3090073 | 3092442 - | 789 | 53720172 | 3093604 spoT | COG0317TK          | GCGCGCCCGGTTTTCTTCAGCCATG  | 1 | 69  | 69  | 1   | 100 Bm_ATCC23344_chr1 | 3510148 | 2187670 | 2187738 | 100 | 345 | 5.50E-11 - |
| BPSL2562 | DNA-directed RNA polymerase omega subunit          | 3092509 | 3092712 - | 67  | 53720173 | 3092978 rpoZ | COG1758K           | GCGGCGGCGCAACGAGACACATAAGC | 1 | 63  | 63  | 1   | 100 Bm_ATCC23344_chr1 | 3510148 | 2187940 | 2188002 | 100 | 315 | 1.30E-09 - |
| BPSL2564 | hypothetical protein BPSL2564                      | 3093463 | 3094386 - | 307 | 53720175 | 3092715 -    | COG1561S           | GCAGAAATGGGATATGGATGTTTTC  | 1 | 103 | 103 | 1   | 100 Bm_ATCC23344_chr1 | 3510148 | 2189614 | 2189716 | 99  | 506 | 3.00E-18 - |
| BPSL2565 | ribonuclease PH                                    | 3094558 | 3095289 + | 243 | 53720176 | 3094311 rph  | COG0689J           | GCGCGAAACATCCATTATCCCATTT  | 1 | 103 | 1   | 103 | 100 Bm_ATCC23344_chr1 | 3510148 | 2189688 | 2189790 | 100 | 515 | 1.20E-18 + |
| BPSL2588 | hypothetical protein BPSL2588                      | 3108136 | 3108714 - | 192 | 53720198 | 3094562 -    | NULL               | ACGATCTCCCTTTTCCGGAAGAGGG  | 1 | 103 | 103 | 1   | 100 Bm_ATCC23344_chr1 | 3510148 | 2194170 | 2194272 | 98  | 497 | 7.60E-18 - |
| BPSL2589 | putative lipoprotein                               | 3108888 | 3109382 + | 164 | 53720199 | 3091774 -    | NULL               | AACCTCTTTCGGGAAAAGGAGATI   | 1 | 103 | 1   | 103 | 100 Bm_ATCC23344_chr1 | 3510148 | 2194246 | 2194348 | 98  | 497 | 7.60E-18 - |
| BPSL2590 | probable membrane transport protein                | 3109801 | 3111114 + | 437 | 53720200 | 3091775 -    | NULL               | CCCGACTCTCGATTTCGAAACAAGGG | 1 | 103 | 1   | 103 | 100 Bm_ATCC23344_chr1 | 3510148 | 2195189 | 2195291 | 100 | 515 | 1.20E-18 + |
| BPSL2591 | hypothetical protein BPSL2591                      | 3111295 | 3111477 + | 60  | 53720201 | 3091991 -    | NULL               | TTTCGGCAGCACCCCGCTGTCTATC  | 1 | 103 | 1   | 103 | 100 Bm_ATCC23344_chr1 | 3510148 |         |         |     |     |            |

|          |                                                     |         |           |     |          |               |                    |                           |   |     |     |     |                       |         |         |         |     |     |            |
|----------|-----------------------------------------------------|---------|-----------|-----|----------|---------------|--------------------|---------------------------|---|-----|-----|-----|-----------------------|---------|---------|---------|-----|-----|------------|
| BPSL2620 | MFS-family transport protein                        | 3142218 | 3143453 - | 411 | 53720230 | 3093939 -     | NULL               | CTCGCGGCGGGCCGACGGCGCGCC  | 1 | 89  | 89  | 1   | 100 Bm_ATCC23344_chr1 | 3510148 | 2228836 | 2228924 | 100 | 445 | 1.70E-15 - |
| BPSL2621 | hypothetical protein BPSL2621                       | 3143540 | 3144160 + | 206 | 53720231 | 3094773 -     | NULL               | TGGAATTCCACGGAAGCGCGCGCC  | 1 | 89  | 1   | 89  | 100 Bm_ATCC23344_chr1 | 3510148 | 2228839 | 2228927 | 100 | 445 | 1.70E-15 + |
| BPSL2623 | glutamate-1-semialdehyde 2,1-aminomutase            | 3145160 | 3146443 + | 427 | 53720233 | 3091548 hemL  | COG0001H           | ACCCTGCGCGCGGTCTCCGCTGAC  | 1 | 103 | 1   | 103 | 100 Bm_ATCC23344_chr1 | 3510148 | 2230437 | 2230539 | 99  | 506 | 3.00E-18 + |
| BPSL2626 | bifunctional 3,4-dihydroxy-2-butanone 4-phosphate   | 3148701 | 3149837 + | 378 | 53720236 | 3092773 ribB  | COG0807H           | TCCGGCGTCGGCGCAACGCGGCGG  | 1 | 103 | 1   | 103 | 100 Bm_ATCC23344_chr1 | 3510148 | 2233983 | 2234085 | 99  | 506 | 3.00E-18 + |
| BPSL2627 | riboflavin synthase subunit beta                    | 3149917 | 3150438 + | 173 | 53720237 | 3091867 ribH  | NULL               | CGGGTTTCGGCTCATCGCCACACTG | 1 | 82  | 1   | 82  | 100 Bm_ATCC23344_chr1 | 3510148 | 2235220 | 2235301 | 98  | 401 | 1.60E-13 + |
| BPSL2630 | putative lipoprotein                                | 3152745 | 3153812 - | 355 | 53720240 | 3094018 -     | COG0741M           | TGCTTCGGCTTCGAGCAGCGGAGAC | 1 | 103 | 103 | 1   | 100 Bm_ATCC23344_chr1 | 3510148 | 2239234 | 2239336 | 100 | 515 | 1.20E-18 - |
| BPSL2631 | 3-octaprenyl-4-hydroxybenzoate carboxy-lyase        | 3154437 | 3155996 + | 519 | 53720241 | 3094696 ubiD  | NULL               | CGCTCGGCGGTGCGCGCGGGTAA   | 1 | 103 | 1   | 103 | 100 Bm_ATCC23344_chr1 | 3510148 | 2239761 | 2239863 | 100 | 515 | 1.20E-18 - |
| BPSL2633 | serine/threonine dehydratase                        | 3157166 | 3158149 + | 37  | 53720243 | 3094461 -     | COG1171E           | TCGTCGGTGGCGGCGCTTTTCTTTT | 1 | 103 | 103 | 1   | 100 Bm_ATCC23344_chr1 | 3510148 | 2243570 | 2243672 | 99  | 506 | 3.00E-18 - |
| BPSL2634 | hypothetical protein BPSL2634                       | 3158311 | 3158604 - | 97  | 53720244 | 3094201 -     | NULL               | TGGCTCGGATTCGGATTTCGTGTA  | 1 | 103 | 103 | 1   | 100 Bm_ATCC23344_chr1 | 3510148 | 2244025 | 2244127 | 100 | 515 | 1.20E-18 - |
| BPSL2635 | hypothetical protein BPSL2635                       | 3159029 | 3160165 + | 384 | 53720245 | 3094202 -     | COG5495S           | GCTCCGCCCCATCATCGACGGGAI  | 1 | 103 | 1   | 103 | 100 Bm_ATCC23344_chr1 | 3510148 | 2244352 | 2244455 | 99  | 505 | 3.00E-18 + |
| BPSL2636 | hypothetical protein BPSL2636                       | 3160248 | 3160811 - | 187 | 53720246 | 3094551 -     | NULL               | TAAGGTGACGCGCGATGCACGCCG  | 1 | 85  | 1   | 85  | 100 Bm_ATCC23344_chr1 | 3510148 | 2245590 | 2245674 | 100 | 425 | 1.40E-14 + |
| BPSL2638 | CrcB-family inner membrane protein                  | 3161215 | 3161601 - | 128 | 53720248 | 3094255 -     | COG0239D           | GTCTCCGACGCGCGGACCATGCGI  | 1 | 103 | 103 | 1   | 100 Bm_ATCC23344_chr1 | 3510148 | 2247023 | 2247125 | 100 | 515 | 1.20E-18 - |
| BPSL2639 | family S53 non-peptidase homologue                  | 3162211 | 3163431 + | 406 | 53720249 | 3094256 -     | COG4934O           | TCCGGGAATTCCTCGGCTTGCCGA  | 1 | 103 | 1   | 103 | 100 Bm_ATCC23344_chr1 | 3510148 | 2247535 | 2247637 | 100 | 515 | 1.20E-18 + |
| BPSL2640 | hypothetical protein BPSL2640                       | 3163699 | 3164427 - | 242 | 53720250 | 3093518 -     | COG0500RQ          | CGCCCCCGCGCGCGCGCATCCA    | 1 | 103 | 103 | 1   | 100 Bm_ATCC23344_chr1 | 3510148 | 2249849 | 2249951 | 98  | 497 | 7.60E-18 - |
| BPSL2641 | Sir2 family protein                                 | 3164671 | 3165921 - | 416 | 53720251 | 3093519 -     | COG0846K           | GAGCGCGGCTCACGACGCGCGCC   | 1 | 103 | 103 | 1   | 100 Bm_ATCC23344_chr1 | 3510148 | 2251331 | 2251433 | 100 | 515 | 1.20E-18 - |
| BPSL2642 | tRNA (guanine-N(7))-methyltransferase               | 3166316 | 3167113 + | 265 | 53720252 | 3093291 -     | COG0220R           | TCGTATTTATCATCGAGTAAGGGCG | 1 | 103 | 1   | 103 | 100 Bm_ATCC23344_chr1 | 3510148 | 2251628 | 2251730 | 100 | 515 | 1.20E-18 + |
| BPSL2643 | undecaprenyl pyrophosphate phosphatase              | 3167269 | 3168099 - | 276 | 53720253 | 3093292 uppP  | NULL               | CATCGCGCGCGCGCGCGGAGAC    | 1 | 79  | 79  | 1   | 100 Bm_ATCC23344_chr1 | 3510148 | 2253510 | 2253588 | 100 | 395 | 3.01E-13 - |
| BPSL2645 | hypothetical protein BPSL2645                       | 3168754 | 3169065 - | 103 | 53720255 | 3094466 -     | COG0727R           | GATGGACAACATCGGATTCGTGTC  | 1 | 103 | 103 | 1   | 100 Bm_ATCC23344_chr1 | 3510148 | 2254476 | 2254578 | 100 | 515 | 1.20E-18 - |
| BPSL2646 | coproporphyrinogen III oxidase                      | 3169253 | 3170647 + | 464 | 53720256 | 3091549 hemN  | COG0635H           | GTATTGTGCCATCCGCGCTGCAC   | 1 | 103 | 1   | 103 | 100 Bm_ATCC23344_chr1 | 3510148 | 2254566 | 2254668 | 100 | 515 | 1.20E-18 + |
| BPSL2648 | probable protein-L-isoaspartate O-methyltransferase | 3171093 | 3171746 + | 217 | 53720258 | 3093624 pcm   | COG2518O           | CGGATCGACGGCGTTCGAAGGCA   | 1 | 103 | 1   | 103 | 100 Bm_ATCC23344_chr1 | 3510148 | 2256406 | 2256508 | 100 | 515 | 1.20E-18 + |
| BPSL2650 | beta alanine-pyruvate transaminase                  | 3172177 | 3173505 - | 442 | 53720260 | 3094317 -     | COG0161H           | AGGCGAATCCCATCGATCGGGCGI  | 1 | 103 | 103 | 1   | 100 Bm_ATCC23344_chr1 | 3510148 | 2258907 | 2259010 | 97  | 487 | 2.10E-17 - |
| BPSL2651 | hypothetical protein BPSL2651                       | 3173859 | 3175166 + | 435 | 53720261 | 3094318 -     | COG0683E           | GACGCGCGCGCGCGCGCATCTGG   | 1 | 103 | 1   | 103 | 100 Bm_ATCC23344_chr1 | 3510148 | 2259164 | 2259266 | 99  | 506 | 3.00E-18 + |
| BPSL2652 | putative branched-chain amino acid transport system | 3175261 | 3176883 + | 540 | 53720262 | 3092033 -     | COG0559E           | CGCGCGTGGGGCGCGCGGCAGC    | 1 | 97  | 1   | 97  | 100 Bm_ATCC23344_chr1 | 3510148 | 2260572 | 2260668 | 100 | 485 | 2.60E-17 - |
| BPSL2656 | UreD-family accessory protein                       | 3179763 | 3180761 + | 332 | 53720266 | 3092926 UreD  | NULL               | TCCGCGCGCAGGGCAGGCGACGC   | 1 | 103 | 1   | 102 | 100 Bm_ATCC23344_chr1 | 3510148 | 2265010 | 2265111 | 96  | 474 | 8.30E-17 + |
| BPSL2657 | urease gamma subunit                                | 3180983 | 3181285 + | 100 | 53720267 | 3093579 ureA  | NULL               | CGGGCGTGCGCCGACGCGGACGT   | 1 | 103 | 1   | 103 | 100 Bm_ATCC23344_chr1 | 3510148 | 2266250 | 2266352 | 100 | 515 | 1.20E-18 - |
| BPSL2658 | urease beta subunit                                 | 3181375 | 3181680 + | 101 | 53720268 | 3093580 ureB  | NULL               | AGGCGGTGATGATTCACCGCATG   | 1 | 92  | 1   | 92  | 100 Bm_ATCC23344_chr1 | 3510148 | 2266653 | 2266744 | 100 | 460 | 3.50E-16 + |
| BPSL2659 | urease alpha subunit                                | 3181745 | 3183451 + | 568 | 53720269 | 3092913 pyrB  | COG0804E           | CGCGCGGCGTTCGCGCGCTGCG    | 1 | 67  | 1   | 67  | 100 Bm_ATCC23344_chr1 | 3510148 | 2267048 | 2267114 | 100 | 335 | 1.60E-10 + |
| BPSL2665 | lipopolysaccharide heptosyltransferase-1            | 3187994 | 3188989 - | 331 | 53720275 | 3093034 waaC1 | COG0859M           | GCATGCTGGCGTTCGCGCTTTTGT  | 1 | 103 | 103 | 1   | 100 Bm_ATCC23344_chr1 | 3510148 | 2274280 | 2274382 | 100 | 515 | 1.20E-18 - |
| BPSL2666 | phosphoglucosyltransferase                          | 3189170 | 3190564 - | 464 | 53720276 | 3094110 pgm   | COG1109G           | CGGTTCGGTTCGCCCTCGCGCGTC  | 1 | 103 | 103 | 1   | 100 Bm_ATCC23344_chr1 | 3510148 | 2275855 | 2275958 | 98  | 496 | 8.40E-18 - |
| BPSL2667 | putative lipopolysaccharide biosynthesis protein    | 3190822 | 3192081 + | 419 | 53720277 | 3094876 -     | COG2244R           | TCGATCGGCCATTTTAATGCTCA   | 1 | 103 | 1   | 103 | 100 Bm_ATCC23344_chr1 | 3510148 | 2276016 | 2276118 | 98  | 506 | 3.00E-18 + |
| BPSL2675 | putative glycosyl transferase                       | 3200555 | 3201385 - | 276 | 53720285 | 3092845 wbiF  | COG1216R           | TGCATTGGATGGCTGGCTGCCAGT  | 1 | 77  | 77  | 1   | 100 Bm_ATCC23344_chr1 | 3510148 | 2276487 | 2276563 | 98  | 376 | 2.00E-12 - |
| BPSL2676 | putative glycosyl transferase                       | 3201460 | 3203301 - | 613 | 53720286 | 3092805 wbiE  | COG0463M, COG1216R | TTGCTGATGCGCGGCGATGGCTGI  | 1 | 54  | 54  | 1   | 100 Bm_ATCC23344_chr1 | 3510148 | 2278403 | 2278456 | 100 | 270 | 1.40E-07 - |
| BPSL2686 | dTDP-glucose 4,6-dehydratase                        | 3212944 | 3214005 - | 353 | 53720296 | 3091967 rmlB  | COG1088M           | CGCGGTGTCATTGACGACCAACGI  | 1 | 103 | 103 | 1   | 100 Bm_ATCC23344_chr1 | 3510148 | 2289107 | 2289209 | 99  | 506 | 3.00E-18 - |
| BPSL2687 | diaminosinetetrathiosphatase                        | 3214383 | 3215231 + | 282 | 53720297 | 3092602 apaH  | NULL               | GAGACCGATGCCAGGCGGGAATTT  | 1 | 103 | 1   | 103 | 100 Bm_ATCC23344_chr1 | 3510148 | 2289387 | 2289489 | 100 | 515 | 1.20E-18 + |
| BPSL2689 | dihydroorotase                                      | 3216245 | 3217522 - | 425 | 53720299 | 3092915 pyrB  | COG0044F           | CGGGCGCGCGGCGTCCGGGGCAA   | 1 | 94  | 94  | 1   | 100 Bm_ATCC23344_chr1 | 3510148 | 2292624 | 2292717 | 98  | 461 | 3.20E-16 - |
| BPSL2690 | aspartate carbamoyltransferase catalytic subunit    | 3217614 | 3218645 + | 343 | 53720300 | 3093493 pyrB  | COG0540F           | ACGCGCGCGACGATCCCGCGCCG   | 1 | 83  | 83  | 1   | 100 Bm_ATCC23344_chr1 | 3510148 | 2293477 | 2293529 | 100 | 415 | 3.80E-14 - |
| BPSL2693 | hypothetical protein BPSL2693                       | 3219668 | 3220246 - | 192 | 53720303 | 3093866 -     | COG1678K           | CGCTGTAGAGTAGAGCTATGTGCI  | 1 | 103 | 103 | 1   | 100 Bm_ATCC23344_chr1 | 3510148 | 2295348 | 2295450 | 100 | 515 | 1.20E-18 - |
| BPSL2694 | hypothetical protein BPSL2694                       | 3220452 | 3221783 - | 443 | 53720304 | 3093855 -     | NULL               | CCGCTTCGCGTGGCGGTTGGGCAI  | 1 | 101 | 101 | 1   | 100 Bm_ATCC23344_chr1 | 3510148 | 2296885 | 2296985 | 100 | 505 | 3.30E-18 - |
| BPSL2695 | rubredoxin                                          | 3221882 | 3222052 - | 56  | 53720305 | 3092277 rubA  | COG1773C           | GCGAGCAACCGGACATGAGGGCG   | 1 | 103 | 103 | 1   | 100 Bm_ATCC23344_chr1 | 3510148 | 2297154 | 2297256 | 100 | 515 | 1.20E-18 - |
| BPSL2696 | putative kinase                                     | 3222272 | 3223120 + | 282 | 53720306 | 3093856 -     | COG0351H           | GTCTGGCGCGCCGAATCCGCGCG   | 1 | 103 | 1   | 103 | 100 Bm_ATCC23344_chr1 | 3510148 | 2297276 | 2297378 | 100 | 515 | 1.20E-18 + |
| BPSL2698 | co-chaperonin GroES                                 | 3225167 | 3225460 - | 97  | 53720308 | 3094607 groES | COG0234O           | CGCATCGTCGACGAGATGTGCTAA  | 1 | 103 | 103 | 1   | 100 Bm_ATCC23344_chr1 | 3510148 | 2100646 | 2100748 | 100 | 515 | 1.20E-18 - |
| BPSL2700 | hypothetical protein BPSL2700                       | 3229267 | 3229701 - | 144 | 53720310 | 3091877 -     | COG1733K           | GCTCGGCGATGGCGGATGTGCTG   | 1 | 103 | 103 | 1   | 100 Bm_ATCC23344_chr1 | 3510148 | 2103927 | 2104029 | 99  | 506 | 3.00E-18 - |
| BPSL2701 | probable alcohol dehydrogenase                      | 3229950 | 3230957 + | 335 | 53720311 | 3094446 -     | COG0604CR          | CGGCACACGATGACGGCGCGCATC  | 1 | 103 | 1   | 103 | 100 Bm_ATCC23344_chr1 | 3510148 | 2104078 | 2104180 | 100 | 515 | 1.20E-18 + |
| BPSL2703 | hypothetical protein BPSL2703                       | 3232494 | 3233009 - | 171 | 53720313 | 3094189 -     | NULL               | CGCGCGCGCGCGGCGTCTCTGTGA  | 1 | 103 | 103 | 1   | 100 Bm_ATCC23344_chr1 | 3510148 | 2107181 | 2107283 | 100 | 515 | 1.20E-18 - |
| BPSL2705 | putative lipoprotein                                | 3234027 | 3235280 - | 417 | 53720315 | 3093984 -     | NULL               | CGCATGACTTCGCGGCGGCGCGCG  | 1 | 62  | 62  | 1   | 100 Bm_ATCC23344_chr1 | 3510148 | 2109452 | 2109513 | 100 | 310 | 2.10E-09 - |
| BPSL2706 | putative lipoprotein                                | 3235340 | 3236938 - | 532 | 53720316 | 3093985 -     | NULL               | CGAATTACCGCGTCCGACCGGCG   | 1 | 103 | 103 | 1   | 100 Bm_ATCC23344_chr1 | 3510148 | 2111110 | 2111212 | 99  | 506 | 3.00E-18 - |
| BPSL2707 | hypothetical protein BPSL2707                       | 3237675 | 3238121 - | 148 | 53720317 | 3091690 -     | COG1733K           | CGGGCGGCGCGGATCGGCGCGCC   | 1 | 103 | 103 | 1   | 100 Bm_ATCC23344_chr1 | 3510148 | 2112294 | 2112396 | 99  | 506 | 3.00E-18 - |
| BPSL2708 | putative exported Metallo-beta-lactamase-family prc | 3238401 | 3239633 + | 410 | 53720318 | 3091691 -     | COG0491R           | TGATACGCGCGGAAACGTTTGTCAG | 1 | 103 | 1   | 103 | 100 Bm_ATCC23344_chr1 | 3510148 | 2112477 | 2112579 | 100 | 515 | 1.20E-18 + |
| BPSL2711 | Lyse-family membrane transport protein              | 3241273 | 3241896 + | 207 | 53720321 | 3093194 -     | COG1280E           | CGCGCGGCGCGGACGACATCCGCG  | 1 | 103 | 1   | 103 | 100 Bm_ATCC23344_chr1 | 3510148 | 2115352 | 2115454 | 100 | 515 | 1.20E-18 + |
| BPSL2713 | putative membrane transport protein                 | 3243615 | 3245057 + | 480 | 53720323 | 3094407 -     | NULL               | CGCGCGGCGCGACGCGGAGGAAC   | 1 | 103 | 1   | 103 | 100 Bm_ATCC23344_chr1 | 3510148 | 2117715 | 2117817 | 99  | 506 | 3.00E-18 + |
| BPSL2714 | hypothetical protein BPSL2714                       | 3245554 | 3246342 + | 262 | 53720324 | 3094408 -     | NULL               | GCTTTTACGCTTCCCGCATCGAC   | 1 | 103 | 1   | 103 | 100 Bm_ATCC23344_chr1 | 3510148 | 2119654 | 2119756 | 100 | 515 | 1.20E-18 + |
| BPSL2715 | putative lipoprotein                                | 3246675 | 3248522 - | 615 | 53720325 | 3092215 -     | NULL               | GGAGTGCGGCTCGCATAACGGCTCG | 1 | 103 | 103 | 1   | 100 Bm_ATCC23344_chr1 | 3510148 | 2122720 | 2122822 | 100 | 515 | 1.20E-18 - |
| BPSL2716 | probable exported hydrolase                         | 3249128 | 3251227 - | 699 | 53720326 | 3092216 -     | COG1073R           | CAGCGACCGCGCGCGCGCGCGCG   | 1 | 103 | 103 | 1   | 100 Bm_ATCC23344_chr1 | 3510148 | 2125425 | 2125527 | 100 | 515 | 1.20E-18 - |
| BPSL2717 | putative lipoprotein                                | 3251347 | 3251715 - | 122 | 53720327 | 3093869 -     | NULL               | CGGCACGCGCGCGCGCGCACGCG   | 1 | 103 | 103 | 6   | 95 Bm_ATCC            |         |         |         |     |     |            |

|          |                                                      |         |           |      |          |               |                    |                             |   |           |     |     |                       |         |         |         |     |     |            |
|----------|------------------------------------------------------|---------|-----------|------|----------|---------------|--------------------|-----------------------------|---|-----------|-----|-----|-----------------------|---------|---------|---------|-----|-----|------------|
| BPSL2760 | putative thioesterase                                | 3299451 | 3299945 + | 164  | 53720370 | 3091465 -     | COG0824R           | GCGCGCCGCCGGGGCGCACGCG      | 1 | 99        | 1   | 99  | 100 Bm_ATCC23344_chr1 | 3510148 | 2173292 | 2173390 | 100 | 495 | 9.30E-18 + |
| BPSL2761 | putative TolQ transport transmembrane protein        | 3300011 | 3300799 + | 262  | 53720371 | 3093135 tolQ  | COG0811U           | ACAAAGCCGATGAACTCGACCCCA    | 1 | 68        | 1   | 68  | 100 Bm_ATCC23344_chr1 | 3510148 | 2173883 | 2173950 | 100 | 340 | 9.30E-11 + |
| BPSL2764 | translocation protein TolB precursor                 | 3302378 | 3303679 + | 433  | 53720374 | 3093134 tolB  | COG0823U           | GCGCATTTGCGCTTACCTCCCGCC    | 1 | 99        | 1   | 99  | 100 Bm_ATCC23344_chr1 | 3510148 | 2176219 | 2176317 | 100 | 495 | 9.30E-18 + |
| BPSL2787 | putative acyl-CoA transferase                        | 3327179 | 3328498 - | 439  | 53720396 | 3091459 wcbT  | COG0156H           | AACCGCGCTTTTCAAATGCACGG     | 1 | 67        | 67  | 1   | 100 Bm_ATCC23344_chr1 | 3510148 | 2371964 | 2372030 | 100 | 335 | 1.60E-10 - |
| BPSL2792 | putative capsule polysaccharide biosynthesis/export  | 3339439 | 3340641 - | 400  | 53720401 | 3092365 wcbO  | NULL               | TGAACCGCGTGGGTGACGGCGGT     | 1 | 103       | 103 | 1   | 100 Bm_ATCC23344_chr1 | 3510148 | 2384107 | 2384209 | 100 | 515 | 1.20E-18 - |
| BPSL2806 | putative capsule polysaccharide export ABC transpor  | 3353701 | 3354849 - | 382  | 53720415 | 3094162 wcbD  | COG3524M           | CATTTCGCTGACGAAATGCTTCCCI   | 1 | 103       | 103 | 1   | 100 Bm_ATCC23344_chr1 | 3510148 | 2398315 | 2398417 | 100 | 515 | 1.20E-18 - |
| BPSL2807 | putative capsular polysaccharide biosynthesis/export | 3355330 | 3356493 - | 387  | 53720416 | 3093048 wcbC  | NULL               | CACCGCGTTAGGCTTGCTTTGTAA    | 1 | 103       | 103 | 1   | 100 Bm_ATCC23344_chr1 | 3510148 | 2399959 | 2400061 | 100 | 515 | 1.20E-18 - |
| BPSL2808 | putative capsular polysaccharide glycosyltransferase | 3356674 | 3357825 - | 383  | 53720417 | 3093047 wcbB  | COG0438M           | AAAGCAAGCGCTAACGGCTGTGA     | 1 | 103       | 1   | 103 | 100 Bm_ATCC23344_chr1 | 3510148 | 2400042 | 2400144 | 100 | 515 | 1.20E-18 + |
| BPSL2810 | putative GDP-mannose pyrophosphorylase               | 3360240 | 3361667 + | 475  | 53720419 | 3093126 manC  | COG0662G, COG0836M | CCCCTTGGCCAGCGGTGACCGCG     | 1 | 103       | 1   | 103 | 100 Bm_ATCC23344_chr1 | 3510148 | 2403607 | 2403709 | 99  | 506 | 3.00E-18 + |
| BPSL2811 | hypothetical protein BPSL2811                        | 3361929 | 3362774 + | 281  | 53720420 | 3093359 -     | COG0121R           | ATGGCTGCGCGGGCAAAATCGGC     | 1 | 103       | 1   | 103 | 100 Bm_ATCC23344_chr1 | 3510148 | 2405296 | 2405398 | 97  | 488 | 1.90E-17 + |
| BPSL2812 | hypothetical protein BPSL2812                        | 3362840 | 3363712 + | 290  | 53720421 | 3093715 -     | COG0668M           | CGCGCGCGCGCATGGCGAAGGTT     | 1 | 68        | 1   | 68  | 100 Bm_ATCC23344_chr1 | 3510148 | 2406242 | 2406309 | 100 | 340 | 9.30E-11 + |
| BPSL2813 | putative DedA family transmembrane protein           | 3364033 | 3364776 - | 247  | 53720422 | 3093716 -     | COG0586S           | GCCTGGCGCGCGCGCTGCGCGCTT    | 1 | 103       | 103 | 1   | 100 Bm_ATCC23344_chr1 | 3510148 | 2408241 | 2408343 | 100 | 515 | 1.20E-18 - |
| BPSL2818 | phosphoribosylaminoimidazole synthetase              | 3369943 | 3370998 - | 351  | 53720427 | 3092877 purM  | COG0150F           | CGGGGCAAGTTGCTTCCCTGAAGT    | 1 | 103       | 103 | 1   | 100 Bm_ATCC23344_chr1 | 3510148 | 2413150 | 2413252 | 100 | 515 | 1.20E-18 - |
| BPSL2819 | hypothetical protein BPSL2819                        | 3371297 | 3372022 + | 241  | 53720428 | 3093778 -     | COG0593J           | CGCCCGCCGCGGCTTGGCGCCGGCC   | 1 | 103       | 1   | 103 | 100 Bm_ATCC23344_chr1 | 3510148 | 2413351 | 2413453 | 100 | 515 | 1.20E-18 - |
| BPSL2824 | 3-methyl-2-oxobutanoate hydroxymethyltransferase     | 3375583 | 3376398 + | 271  | 53720433 | 3093227 panB  | COG0413H           | CGAACGCGCGCGCGCTGCGCGCAT    | 1 | 67        | 1   | 67  | 100 Bm_ATCC23344_chr1 | 3510148 | 2417673 | 2417739 | 100 | 335 | 1.60E-10 + |
| BPSL2826 | putative DnaI chaperone protein                      | 3378622 | 3379752 - | 376  | 53720435 | 3093637 dnaI  | COG0484O           | CTCGCTGCGGGCGCGGCACCGCGGC   | 1 | 103       | 103 | 1   | 100 Bm_ATCC23344_chr1 | 3510148 | 2421896 | 2421998 | 100 | 515 | 1.20E-18 - |
| BPSL2827 | molecular chaperone DnaK                             | 3380019 | 3381971 - | 650  | 53720436 | 3093638 dnaK  | COG0443O           | CGCGCGACTTATTTCGATGCGAGAC   | 1 | 103       | 103 | 1   | 100 Bm_ATCC23344_chr1 | 3510148 | 2424115 | 2424217 | 100 | 515 | 1.20E-18 - |
| BPSL2829 | putative heat shock protein                          | 3382564 | 3383121 - | 185  | 53720437 | 3093283 -     | COG0576O           | CCATTTCACCGCATATTGTGCGCGGC  | 1 | 103       | 103 | 1   | 100 Bm_ATCC23344_chr1 | 3510148 | 2425265 | 2425367 | 100 | 515 | 1.20E-18 - |
| BPSL2831 | ferrochelatase                                       | 3384031 | 3385134 - | 367  | 53720439 | 3093284 -     | NULL               | TCGCGTCCGGCTACGTCAATGCCCA   | 1 | 103       | 103 | 1   | 100 Bm_ATCC23344_chr1 | 3510148 | 2427278 | 2427380 | 100 | 515 | 1.20E-18 - |
| BPSL2832 | heat-inducible transcription repressor               | 3385307 | 3386329 - | 340  | 53720440 | 3094244 -     | COG1420K           | AACCGCCCGCGCGCGCGCGCGCG     | 1 | 103       | 103 | 1   | 100 Bm_ATCC23344_chr1 | 3510148 | 2428473 | 2428575 | 100 | 515 | 1.20E-18 - |
| BPSL2833 | inorganic polyphosphate/ATP-NAD kinase               | 3386463 | 3387365 + | 300  | 53720441 | 3094245 ppnK  | COG0061G           | GCGGAGCGCCGCTTGCGCGCTCTGC   | 1 | 103       | 1   | 103 | 100 Bm_ATCC23344_chr1 | 3510148 | 2428509 | 2428611 | 100 | 515 | 1.20E-18 + |
| BPSL2836 | hypothetical protein BPSL2836                        | 3392387 | 3396580 + | 1397 | 53720444 | 3094554 -     | COG3164S           | AGCCCGCCGACGCGCGCTGCGGCA    | 1 | 103       | 1   | 103 | 100 Bm_ATCC23344_chr1 | 3510148 | 2434433 | 2434535 | 100 | 515 | 1.20E-18 + |
| BPSL2837 | putative carbon-nitrogen hydrolase protein           | 3396632 | 3397459 + | 275  | 53720445 | 3091839 -     | COG0388R           | AGCGGCCCGCGCGCCCGCACCCCTT   | 1 | 54        | 1   | 54  | 100 Bm_ATCC23344_chr1 | 3510148 | 2438727 | 2438780 | 100 | 270 | 1.40E-07 + |
| BPSL2838 | putative DNA gyrase control protein                  | 3397539 | 3399035 + | 498  | 53720446 | 3092359 tidD  | COG0312R           | CGCGCGATCGCCGCGCAACCGCGCA   | 1 | 82        | 1   | 82  | 100 Bm_ATCC23344_chr1 | 3510148 | 2439606 | 2439687 | 100 | 410 | 6.40E-14 + |
| BPSL2839 | 3-deoxy-7-phosphoheptulonate synthase                | 3399445 | 3400518 + | 357  | 53720447 | 3092395 aroG  | COG0722E           | CGGGCGCATCCACCGCTTACCGGAA   | 1 | 103       | 1   | 103 | 100 Bm_ATCC23344_chr1 | 3510148 | 2441491 | 2441593 | 99  | 506 | 3.00E-18 + |
| BPSL2840 | flavohemoprotein                                     | 3400797 | 3402005 - | 402  | 53720448 | 3092359 hmpA  | COG1017C, COG1018C | GCAATCGCGGGCGGCTATGCGGCA    | 1 | 103       | 1   | 103 | 100 Bm_ATCC23344_chr1 | 3510148 | 2523652 | 2523754 | 100 | 515 | 1.20E-18 + |
| BPSL2841 | hypothetical protein BPSL2841                        | 3402117 | 3402689 - | 190  | 53720449 | 3091840 -     | COG2096S           | ACGCTCGAATGGATGCGCGCGCGCC   | 1 | 103       | 1   | 103 | 100 Bm_ATCC23344_chr1 | 3510148 | 2522968 | 2523070 | 100 | 515 | 1.20E-18 + |
| BPSL2842 | putative FAD-binding oxidase                         | 3402853 | 3404262 + | 469  | 53720450 | 3094160 -     | COG0277C           | CAGCCCGGCTTGGGGCGGCGCGCA    | 1 | 103       | 103 | 1   | 100 Bm_ATCC23344_chr1 | 3510148 | 2522902 | 2523004 | 100 | 515 | 1.20E-18 - |
| BPSL2843 | putative glycolate oxidase subunit GlcD              | 3404327 | 3405820 + | 497  | 53720451 | 3093324 glcD  | COG0277C           | AAACACACGGCGCCCGCGACGAGCC   | 1 | 67        | 67  | 1   | 100 Bm_ATCC23344_chr1 | 3510148 | 2521428 | 2521494 | 100 | 335 | 1.60E-10 - |
| BPSL2844 | putative glycolate oxidase subunit GlcE              | 3405922 | 3407010 + | 362  | 53720452 | 3092816 glcE  | COG0277C           | GCCGCGCGCGGGCGCCGAGCGGGA    | 1 | 103       | 103 | 1   | 100 Bm_ATCC23344_chr1 | 3510148 | 2519833 | 2519935 | 99  | 506 | 3.00E-18 - |
| BPSL2846 | hypothetical protein BPSL2846                        | 3408489 | 3409187 + | 232  | 53720454 | 3094161 -     | COG0325R           | CGGTTGTCGCTATAAATCTCCGCGAT  | 1 | 103       | 103 | 1   | 100 Bm_ATCC23344_chr1 | 3510148 | 2517293 | 2517395 | 100 | 515 | 1.20E-18 - |
| BPSL2850 | putative phosphonates transport ATP-binding protei   | 3412347 | 3413318 - | 323  | 53720458 | 3091665 phnC  | COG3638P           | CTCGCGCGGTTCCGGCGCGCGCTTC   | 1 | 103       | 1   | 103 | 100 Bm_ATCC23344_chr1 | 3510148 | 2512351 | 2512453 | 99  | 506 | 3.00E-18 - |
| BPSL2857 | putative phosphonate metabolism PhnG protein         | 3419033 | 3419581 - | 182  | 53720465 | 3093458 phnG  | COG3624P           | AATTGCGCTATGCTGCGACGCGATTC  | 1 | 103       | 1   | 103 | 100 Bm_ATCC23344_chr1 | 3510148 | 2506085 | 2506187 | 98  | 497 | 7.60E-18 + |
| BPSL2858 | putative GntR family transcriptional regulator       | 3419714 | 3420532 + | 272  | 53720466 | 3093457 phnF  | COG2188K           | ACCACCCAGTGTGCTAAACGTCTAG   | 1 | 103       | 103 | 1   | 100 Bm_ATCC23344_chr1 | 3510148 | 2506050 | 2506152 | 98  | 497 | 7.60E-18 - |
| BPSL2861 | 4-hydroxybenzoate octaprenyltransferase              | 3422301 | 3423251 - | 316  | 53720469 | 3094205 ubiA  | COG0382H           | CGCGGCGCGCGCGCGCGCGCGCTCG   | 1 | 103       | 1   | 103 | 100 Bm_ATCC23344_chr1 | 3510148 | 2502446 | 2502548 | 99  | 506 | 3.00E-18 + |
| BPSL2863 | putative ferritin DPS-family DNA binding protein     | 3424448 | 3424936 - | 162  | 53720471 | 3093452 -     | COG0783P           | GCTGCCCATCGGCATGTCGCTCGCG   | 1 | 103       | 1   | 103 | 100 Bm_ATCC23344_chr1 | 3510148 | 2500798 | 2500900 | 100 | 515 | 1.20E-18 + |
| BPSL2864 | hypothetical protein BPSL2864                        | 3425136 | 3425309 - | 57   | 53720472 | 3092019 -     | NULL               | TCGCGCGCGCGCGCGCGCGCGGCG    | 1 | 101       | 1   | 101 | 100 Bm_ATCC23344_chr1 | 3510148 | 2500428 | 2500527 | 99  | 490 | 1.60E-17 + |
| BPSL2865 | catalase-peroxidase protein                          | 3425408 | 3427654 - | 748  | 53720473 | 3092072 katG  | COG0376P           | AGCGCGCGCGCGTGGCGGGCGCGCT   | 1 | 103       | 1   | 103 | 100 Bm_ATCC23344_chr1 | 3510148 | 2498081 | 2498183 | 99  | 506 | 3.00E-18 + |
| BPSL2866 | oxidative stress regulatory protein                  | 3428080 | 3429039 - | 319  | 53720474 | 3093036 oxyR  | COG0583K           | GCGCGCTTGGGACAGGCGTGTGTTTC  | 1 | 103       | 1   | 103 | 100 Bm_ATCC23344_chr1 | 3510148 | 2496966 | 2496978 | 100 | 515 | 1.20E-18 + |
| BPSL2868 | S-adenosylmethionine:tRNA ribosyltransferase-isode   | 3432038 | 3433120 + | 360  | 53720476 | 3090355 queA  | NULL               | GAGCGACCGCGCGCGCGCGCGCGCG   | 1 | 103       | 103 | 1   | 100 Bm_ATCC23344_chr1 | 3510148 | 2493795 | 2493897 | 100 | 515 | 1.20E-18 - |
| BPSL2869 | queuine tRNA-ribosyltransferase                      | 3433421 | 3434614 + | 397  | 53720477 | 3092225 tgt   | COG0343J           | CGCGAGCCGCGGCTTCACTTTTTCICI | 1 | 103       | 103 | 1   | 100 Bm_ATCC23344_chr1 | 3510148 | 2492452 | 2492554 | 100 | 515 | 1.20E-18 - |
| BPSL2870 | preprotein translocase subunit YajC                  | 3435044 | 3435370 + | 108  | 53720478 | 3092020 yajC  | COG1862U           | AACAGCTTGAAACCAAGCGCGCATTT  | 1 | 103       | 103 | 1   | 100 Bm_ATCC23344_chr1 | 3510148 | 2490874 | 2490976 | 100 | 515 | 1.20E-18 - |
| BPSL2871 | protein export protein SecD                          | 3435478 | 3437502 + | 674  | 53720479 | 3091980 secD  | COG0342U           | GCGCGGCTCGGCGCGCGCGACGCGCC  | 1 | 103       | 103 | 1   | 100 Bm_ATCC23344_chr1 | 3510148 | 2490440 | 2490542 | 100 | 515 | 1.20E-18 - |
| BPSL2873 | hypothetical protein BPSL2873                        | 3438714 | 3439337 - | 204  | 53720481 | 3092293 -     | NULL               | GCGTTTTTCGGGAGGCGCGCGCGGTGI | 1 | 103       | 1   | 103 | 100 Bm_ATCC23344_chr1 | 3510148 | 2486490 | 2486592 | 99  | 506 | 3.00E-18 + |
| BPSL2874 | hypothetical protein BPSL2874                        | 3439438 | 3440016 - | 192  | 53720482 | 3092294 -     | NULL               | CGCGCGCGCGGCGTTCGCAACACCC   | 1 | 69        | 1   | 69  | 100 Bm_ATCC23344_chr1 | 3510148 | 2485845 | 2485913 | 100 | 345 | 5.50E-11 + |
| BPSL2876 | putative cytochrome b-561 membrane protein           | 3440655 | 3441218 - | 187  | 53720484 | 3094292 -     | COG3038C           | CTGCGATTGCTGCGGGCTTGCGGTA   | 1 | 103       | 1   | 103 | 100 Bm_ATCC23344_chr1 | 3510148 | 2484609 | 2484711 | 100 | 515 | 1.20E-18 + |
| BPSL2877 | putative paraquat-inducible protein                  | 3441483 | 3442139 + | 218  | 53720485 | 3092120 -     | COG2995S           | CGCGACGCTTGACCAATCTCCGCGAA  | 1 | 103       | 103 | 1   | 100 Bm_ATCC23344_chr1 | 3510148 | 2484442 | 2484544 | 99  | 506 | 3.00E-18 - |
| BPSL2882 | putative RNA-methylase protein                       | 3448434 | 3449726 + | 430  | 53720490 | 3092339 -     | COG0116L           | CAAGACGCTGGCGGACCGCGGGCGTC  | 1 | 103       | 103 | 1   | 100 Bm_ATCC23344_chr1 | 3510148 | 2477649 | 2477751 | 100 | 515 | 1.20E-18 - |
| BPSL2883 | hypothetical protein BPSL2883                        | 3451155 | 3451565 + | 136  | 53720491 | 3092340 -     | COG3324R           | CGTCACTGCGCGACGAATACGTTGT   | 1 | 103       | 103 | 1   | 100 Bm_ATCC23344_chr1 | 3510148 | 2475034 | 2475136 | 99  | 506 | 3.00E-18 - |
| BPSL2887 | NAD(P) transhydrogenase subunit alpha                | 3455033 | 3456172 - | 179  | 53720495 | 3093541 pntAA | COG3288C           | TCGGTTAAAGTGGCGGCTGAAACAC   | 1 | 103       | 1   | 103 | 100 Bm_ATCC23344_chr1 | 3510148 | 2470044 | 2470146 | 100 | 515 | 1.20E-18 + |
| BPSL2888 | putative hydrolase                                   | 3456416 | 3456925 + | 369  | 53720496 | 3092417 -     | COG0494LR          | GCGGGTGGCGCGCGCGCGCACAGCG   | 1 | 103       | 103 | 1   | 100 Bm_ATCC23344_chr1 | 3510148 | 2469898 | 2470000 | 100 | 515 | 1.20E-18 - |
| BPSL2890 | putative glutamate synthase                          | 3458195 | 3459835 + | 546  | 53720498 | 3092460 -     | COG0069E           | CGGCGACGCGACGACGCGCGCGGCC   | 1 | Not found |     |     |                       |         |         |         |     |     |            |
| BPSL2892 | aminopeptidase P                                     | 3461269 | 3462678 + | 469  | 53720500 | 3093835 -     | COG0006E           | AATCGCGCGCGCGCGCGCGCATCGCA  | 1 | Not found |     |     |                       |         |         |         |     |     |            |
| BPSL2894 | putative nitrogen regulation-related protein         | 3464124 | 3465188 + | 354  | 53720502 | 3094392 -     | COG0042J           | GACAGTTGCTTAACTTCGGCGGACAC  | 1 | 103       | 103 | 1   | 100 Bm_ATCC2          |         |         |         |     |     |            |

|          |                                                      |         |           |     |          |               |                    |                             |   |     |     |     |                       |         |         |         |     |     |            |
|----------|------------------------------------------------------|---------|-----------|-----|----------|---------------|--------------------|-----------------------------|---|-----|-----|-----|-----------------------|---------|---------|---------|-----|-----|------------|
| BPSL2926 | putative LysR-family transcriptional regulator       | 3493893 | 3494843 - | 316 | 53720534 | 3094710 -     | COG0583K           | TTCCGCGCGCGCCGACGTCGATGCI   | 1 | 103 | 103 | 1   | 100 Bm_ATCC23344_chr1 | 3510148 | 2542290 | 2542392 | 98  | 497 | 7.60E-18 - |
| BPSL2927 | putative nitrate transporter                         | 3495261 | 3496718 + | 485 | 53720535 | 3092269 -     | COG2223P           | GCCTCGCGCGGCGATTACGCGCGTTCI | 1 | 103 | 1   | 103 | 100 Bm_ATCC23344_chr1 | 3510148 | 2542610 | 2542712 | 100 | 515 | 1.20E-18 + |
| BPSL2930 | putative glucanase permease                          | 3498867 | 3500228 - | 453 | 53720538 | 3092428 -     | COG2610GE          | AGCGTCCCGACGGCGGGCAGCAACC   | 1 | 103 | 103 | 1   | 100 Bm_ATCC23344_chr1 | 3510148 | 2547645 | 2547747 | 100 | 515 | 1.20E-18 - |
| BPSL2932 | phosphogluconate dehydratase                         | 3501096 | 3502949 - | 617 | 53720540 | 3093431 edd   | NULL               | GTAGTTTTTCTACTAACTCGCGCCC   | 1 | 103 | 103 | 1   | 100 Bm_ATCC23344_chr1 | 3510148 | 2550366 | 2550468 | 100 | 515 | 1.20E-18 - |
| BPSL2933 | putative regulatory protein                          | 3503247 | 3504245 + | 332 | 53720541 | 3092429 -     | COG1737K           | GATCGATATCGGGAATTCGGTAGA    | 1 | 103 | 1   | 103 | 100 Bm_ATCC23344_chr1 | 3510148 | 2550566 | 2550668 | 99  | 506 | 3.00E-18 + |
| BPSL2938 | leucyl-tRNA synthetase                               | 3508297 | 3510891 - | 864 | 53720546 | 3094550 leuS  | COG0495J           | CCCCGCGCGCGGGGAGCGCGGAG     | 1 | 103 | 103 | 1   | 100 Bm_ATCC23344_chr1 | 3510148 | 2558279 | 2558381 | 99  | 506 | 3.00E-18 - |
| BPSL2942 | putative outer membrane protein                      | 3513232 | 3514056 - | 274 | 53720550 | 3093811 omIA  | COG2913J           | AGAGTACAATTCGAGGGCTCAATAA   | 1 | 103 | 103 | 1   | 100 Bm_ATCC23344_chr1 | 3510148 | 2561468 | 2561570 | 100 | 515 | 1.20E-18 - |
| BPSL2943 | ferric uptake regulator                              | 3514171 | 3514599 + | 142 | 53720551 | 3091814 fur   | COG0735P           | TTCGGCTTGTCCAGGCGCGCGGAG    | 1 | 103 | 1   | 103 | 100 Bm_ATCC23344_chr1 | 3510148 | 2561485 | 2561587 | 100 | 515 | 1.20E-18 + |
| BPSL2945 | putative allantoinase                                | 3515274 | 3516284 - | 336 | 53720553 | 3094036 -     | NULL               | AGCTTCGGCGCGCGGCTTCGTTTTI   | 1 | 103 | 103 | 1   | 100 Bm_ATCC23344_chr1 | 3510148 | 2563692 | 2563794 | 100 | 515 | 1.20E-18 - |
| BPSL2946 | C4-dicarboxylate transport protein                   | 3516422 | 3517744 - | 440 | 53720554 | 3094344 dctA  | COG1301C           | CTTGACTCGACTATATCGGCTTCCTA  | 1 | 103 | 103 | 1   | 100 Bm_ATCC23344_chr1 | 3510148 | 2565152 | 2565254 | 98  | 497 | 7.60E-18 - |
| BPSL2947 | putative GntR-family regulatory protein              | 3517990 | 3518682 + | 230 | 53720555 | 3094037 -     | COG2186K           | CGGGCCCGCGCGACGCGGATCAT     | 1 | 103 | 1   | 103 | 100 Bm_ATCC23344_chr1 | 3510148 | 2565300 | 2565402 | 98  | 497 | 7.60E-18 + |
| BPSL2948 | cyn operon transcriptional activator (LysR-family)   | 3519305 | 3520240 - | 311 | 53720556 | 3092007 cynR  | COG0583K           | TCGATGGCGAGTGCCTAGCACCA     | 1 | 103 | 103 | 1   | 100 Bm_ATCC23344_chr1 | 3510148 | 2567659 | 2567761 | 99  | 506 | 3.00E-18 - |
| BPSL2949 | carbonic anhydrase                                   | 3520355 | 3521014 + | 219 | 53720557 | 3092530 cynT  | NULL               | CGGTTGCCTATGCGCAAAATAATAA   | 1 | 103 | 1   | 103 | 100 Bm_ATCC23344_chr1 | 3510148 | 2567676 | 2567778 | 99  | 506 | 3.00E-18 + |
| BPSL2950 | cyanate hydratase                                    | 3521101 | 3521571 + | 156 | 53720558 | 3092008 cynS  | COG1513P           | CGCATGACACACACGCGCGCGCCCC   | 1 | 89  | 1   | 89  | 100 Bm_ATCC23344_chr1 | 3510148 | 2568436 | 2568524 | 98  | 436 | 4.30E-15 + |
| BPSL2951 | hypothetical protein BPSL2951                        | 3521744 | 3522943 + | 399 | 53720559 | 3092833 -     | NULL               | TTTCGGCATTCGCGGCGTTCGGGTA   | 1 | 103 | 1   | 103 | 100 Bm_ATCC23344_chr1 | 3510148 | 2569072 | 2569175 | 96  | 471 | 1.10E-16 + |
| BPSL2952 | glyceraldehyde 3-phosphate dehydrogenase 1           | 3523351 | 3524361 - | 336 | 53720560 | 3092714 gapA  | COG0057G           | CCCATTCGACGCCGCGGCGCGCGCTG  | 1 | 93  | 93  | 1   | 100 Bm_ATCC23344_chr1 | 3510148 | 2571789 | 2571881 | 100 | 465 | 2.10E-16 - |
| BPSL2953 | transketolase                                        | 3524452 | 3526479 - | 675 | 53720561 | 3094063 tktA  | COG0021G           | CGCCTCCGCGCGCGCGCGCGCGG     | 1 | 103 | 103 | 1   | 100 Bm_ATCC23344_chr1 | 3510148 | 2573907 | 2574009 | 100 | 515 | 1.20E-18 - |
| BPSL2954 | sermidine synthase                                   | 3526742 | 3527599 + | 285 | 53720562 | 3092834 speE  | COG0421E           | GGCCTGTGCGGAATCCGCGCGCGCG   | 1 | 103 | 1   | 103 | 100 Bm_ATCC23344_chr1 | 3510148 | 2574072 | 2574174 | 99  | 506 | 3.00E-18 + |
| BPSL2957 | hypothetical protein BPSL2957                        | 3529221 | 3529784 - | 187 | 53720565 | 3094052 -     | NULL               | CAACCTGTCTCAGCGCGTACGTACG   | 1 | 103 | 103 | 1   | 100 Bm_ATCC23344_chr1 | 3510148 | 2577047 | 2577149 | 100 | 515 | 1.20E-18 - |
| BPSL2958 | putative exported ribonuclease                       | 3529801 | 3530232 - | 143 | 53720566 | 3094053 -     | COG4290F           | TTTCATTTCCTAACGACGATTGATT   | 1 | 103 | 103 | 1   | 100 Bm_ATCC23344_chr1 | 3510148 | 2577660 | 2577762 | 100 | 515 | 1.20E-18 - |
| BPSL2959 | phosphate acetyltransferase                          | 3530561 | 3532870 - | 769 | 53720567 | 3093937 maeB  | COG0280C, COG0281C | GGTCGCGCGTGTCAAACCTAATCC    | 1 | 103 | 103 | 1   | 100 Bm_ATCC23344_chr1 | 3510148 | 2580297 | 2580399 | 100 | 515 | 1.20E-18 - |
| BPSL2960 | thiamine monophosphate kinase                        | 3533072 | 3534073 + | 333 | 53720568 | 3093144 -     | COG0611H           | AAACGTACAGGAATCGCGCGCGCGC   | 1 | 103 | 1   | 103 | 100 Bm_ATCC23344_chr1 | 3510148 | 2580401 | 2580503 | 100 | 515 | 1.20E-18 + |
| BPSL2961 | putative phosphatidylglycerophosphatase              | 3534207 | 3534680 + | 157 | 53720569 | 3093145 -     | COG1267I           | CGCCAGCCAGCCGCGCGCGCACGCG   | 1 | 103 | 1   | 103 | 100 Bm_ATCC23344_chr1 | 3510148 | 2581536 | 2581638 | 100 | 515 | 1.20E-18 + |
| BPSL2963 | orotidine 5'-phosphate decarboxylase                 | 3535507 | 3536334 - | 275 | 53720571 | 3093383 pyrF  | COG0284F           | CGCGCGCGCGCGCGCGCGCGCGCTG   | 1 | 99  | 99  | 1   | 100 Bm_ATCC23344_chr1 | 3510148 | 2583761 | 2583859 | 97  | 477 | 6.10E-17 - |
| BPSL2964 | putative epimerase                                   | 3536431 | 3537414 - | 327 | 53720572 | 3092985 -     | COG2017G           | GGACCGAATCATGACGCGGACGCGA   | 1 | 103 | 103 | 1   | 100 Bm_ATCC23344_chr1 | 3510148 | 2584841 | 2584943 | 99  | 506 | 3.00E-18 - |
| BPSL2966 | L-arabinose transport system, permease protein       | 3538396 | 3539400 - | 334 | 53720574 | 3094069 araH  | COG1172G           | CGCGCGCGCGCGCGCGCGGATGACT   | 1 | 103 | 103 | 1   | 100 Bm_ATCC23344_chr1 | 3510148 | 2586827 | 2586929 | 99  | 506 | 3.00E-18 - |
| BPSL2967 | L-arabinose transport system, ATP-binding protein    | 3539515 | 3541047 - | 310 | 53720575 | 3094068 araG  | COG1129G           | GGCAAGTCGCGCGCGGCTCGCGCGC   | 1 | 70  | 70  | 1   | 100 Bm_ATCC23344_chr1 | 3510148 | 2588474 | 2588543 | 100 | 350 | 3.30E-11 - |
| BPSL2968 | putative L-arabinose transport system, exported prot | 3541115 | 3542110 - | 531 | 53720576 | 3092606 -     | COG1879G           | GTGCACGCGCGAAGCGCGCGCGCGC   | 1 | 103 | 103 | 1   | 100 Bm_ATCC23344_chr1 | 3510148 | 2589537 | 2589639 | 100 | 515 | 1.20E-18 - |
| BPSL2970 | keto-hydroxyglutarate-aldolase/keto-deoxy-phospho    | 3543016 | 3543645 - | 209 | 53720578 | 3093435 -     | COG0800G           | GCCTCGCTCTCTACACGAAGTGGG    | 1 | 100 | 100 | 1   | 100 Bm_ATCC23344_chr1 | 3510148 | 2591072 | 2591171 | 100 | 500 | 5.50E-18 - |
| BPSL2972 | putative IκR-family regulatory protein               | 3544753 | 3545670 - | 305 | 53720580 | 3093994 -     | COG1414K           | CGCCCCCTACAATCCGAAGCACAI    | 1 | 103 | 103 | 1   | 100 Bm_ATCC23344_chr1 | 3510148 | 2593097 | 2593199 | 99  | 506 | 3.00E-18 - |
| BPSL2973 | hypothetical protein BPSL2973                        | 3545935 | 3546366 - | 143 | 53720581 | 3093995 -     | NULL               | CGCCGAACGATGCGCGCGCGCGCGC   | 1 | 63  | 63  | 1   | 100 Bm_ATCC23344_chr1 | 3510148 | 2593793 | 2593855 | 100 | 315 | 1.30E-09 - |
| BPSL2974 | putative lipoprotein                                 | 3546427 | 3548061 - | 544 | 53720582 | 3092542 -     | NULL               | GGCTATATTGGCGACGCGCTTGCTG   | 1 | 103 | 103 | 1   | 100 Bm_ATCC23344_chr1 | 3510148 | 2595488 | 2595590 | 100 | 515 | 1.20E-18 - |
| BPSL2977 | putative exoribonuclease II                          | 3550187 | 3552265 - | 692 | 53720585 | 3093843 -     | COG0557K           | GTGTATCGGACGCTCGACACCTATA   | 1 | 103 | 103 | 1   | 100 Bm_ATCC23344_chr1 | 3510148 | 2599692 | 2599794 | 100 | 515 | 1.20E-18 - |
| BPSL2979 | UDP-N-acetylmuramate-L-alanyl-gamma-D-glutamyl-      | 3552955 | 3554439 - | 494 | 53720587 | 3091976 mpl   | COG0773M           | CGGTGCGGAGCGACCGCGCGGGTGT   | 1 | 103 | 103 | 1   | 100 Bm_ATCC23344_chr1 | 3510148 | 2601866 | 2601968 | 100 | 515 | 1.20E-18 - |
| BPSL2980 | hypothetical protein BPSL2980                        | 3554561 | 3555217 + | 218 | 53720588 | 3093461 -     | NULL               | CGCGCGCAAGAGGGCTATTGTAA     | 1 | 103 | 1   | 103 | 100 Bm_ATCC23344_chr1 | 3510148 | 2601890 | 2601992 | 100 | 515 | 1.20E-18 + |
| BPSL2981 | putative thioredoxin-related protein                 | 3555288 | 3555770 + | 160 | 53720589 | 3093462 -     | COG0526OC          | CAAAAGGCATTTCGCGCGGACGTGTG  | 1 | 73  | 1   | 73  | 100 Bm_ATCC23344_chr1 | 3510148 | 2602647 | 2602719 | 98  | 356 | 1.80E-11 - |
| BPSL2982 | 3-dehydroquinate dehydratase                         | 3555966 | 3556418 + | 150 | 53720590 | 3094027 aroQ1 | COG0757E           | CGCCGCGCGCTCGCGCGCGCGCTG    | 1 | 103 | 1   | 103 | 100 Bm_ATCC23344_chr1 | 3510148 | 2603295 | 2603397 | 100 | 515 | 1.20E-18 + |
| BPSL2983 | acetyl-CoA carboxylase                               | 3556486 | 3556959 + | 157 | 53720591 | 3092969 accB  | COG0511I           | TTTTCAAGAACTCGATTACGCGCC    | 1 | 70  | 1   | 70  | 100 Bm_ATCC23344_chr1 | 3510148 | 2603848 | 2603917 | 100 | 350 | 3.30E-11 + |
| BPSL2984 | acetyl-CoA carboxylase                               | 3557044 | 3558411 + | 455 | 53720592 | 3093093 accC  | COG0439P           | GACCCGCGCGCGCGCGCGCGCGCG    | 1 | 87  | 1   | 87  | 100 Bm_ATCC23344_chr1 | 3510148 | 2604389 | 2604475 | 100 | 435 | 4.80E-15 + |
| BPSL2987 | thiol peroxidase                                     | 3560841 | 3561344 - | 167 | 53720595 | 3093955 tpx   | COG2077O           | CGCGCGCGGACGCGCGCGCGCGCGC   | 1 | 70  | 1   | 70  | 100 Bm_ATCC23344_chr1 | 3510148 | 2608221 | 2608290 | 100 | 350 | 3.30E-11 + |
| BPSL2988 | putative sugar kinase                                | 3561445 | 3562383 + | 312 | 53720596 | 3093473 -     | COG0524G           | CGCCGACCGAACGCGCGCGCGCGCC   | 1 | 103 | 1   | 103 | 100 Bm_ATCC23344_chr1 | 3510148 | 2608792 | 2608894 | 99  | 506 | 3.00E-18 - |
| BPSL2991 | ribonucleotide-diphosphate reductase beta subunit    | 3564144 | 3565196 - | 350 | 53720599 | 3093394 nrdB  | COG0208F           | TCGGATGCGCGGATGCGCGCTTACG   | 1 | 103 | 103 | 1   | 100 Bm_ATCC23344_chr1 | 3510148 | 2612509 | 2612611 | 100 | 515 | 1.20E-18 - |
| BPSL2992 | ribonucleotide-diphosphate reductase alpha subunit   | 3565723 | 3568710 - | 295 | 53720600 | 3091740 -     | COG0209F           | CGCCGCTTCTTCACGCTTACCGCG    | 1 | 103 | 103 | 1   | 100 Bm_ATCC23344_chr1 | 3510148 | 2616023 | 2616125 | 99  | 506 | 3.00E-18 - |
| BPSL2994 | hypothetical protein BPSL2994                        | 3570102 | 3571001 - | 999 | 53720603 | 3091559 -     | COG4137R           | GGGAGCGGATGCGACGTTGAAGCCG   | 1 | 90  | 90  | 1   | 100 Bm_ATCC23344_chr1 | 3510148 | 2618314 | 2618403 | 100 | 450 | 1.00E-15 - |
| BPSL2995 | signal recognition particle protein                  | 3571089 | 3572456 + | 455 | 53720604 | 3092670 ffh   | COG0541U           | GTTCGAAGTTTACATAGGCGCCCTI   | 1 | 90  | 1   | 90  | 100 Bm_ATCC23344_chr1 | 3510148 | 2618317 | 2618406 | 100 | 450 | 1.00E-15 + |
| BPSL2996 | hypoxanthine-guanine phosphoribosyltransferase       | 3572554 | 3573105 + | 183 | 53720605 | 3094711 -     | COG0634F           | TTGCGCGCGCGCGCGCGCGCGGCT    | 1 | 100 | 1   | 100 | 100 Bm_ATCC23344_chr1 | 3510148 | 2619772 | 2619871 | 100 | 500 | 5.50E-18 + |
| BPSL2998 | prolyl-tRNA synthetase                               | 3573930 | 3575666 - | 578 | 53720607 | 3091660 proS  | COG0442J           | GCTATGTCACTTCGGCGCGGACCTAG  | 1 | 103 | 103 | 1   | 100 Bm_ATCC23344_chr1 | 3510148 | 2622979 | 2623081 | 100 | 515 | 1.20E-18 - |
| BPSL2999 | dinucleoside polyphosphate hydrolase                 | 3575884 | 3576534 + | 216 | 53720608 | 3092881 -     | COG0494LR          | GTGATGTGACACGCTCGCGCGGGAT   | 1 | 103 | 1   | 103 | 100 Bm_ATCC23344_chr1 | 3510148 | 2623099 | 2623201 | 100 | 515 | 1.20E-18 - |
| BPSL3000 | putative lipoprotein                                 | 3576590 | 3577177 + | 195 | 53720609 | 3092882 -     | NULL               | CGCGCGGCGTGGTTCGACGGGGAAT   | 1 | 58  | 1   | 58  | 100 Bm_ATCC23344_chr1 | 3510148 | 2623850 | 2623907 | 100 | 290 | 1.70E-08 + |
| BPSL3002 | gamma-glutamyl kinase                                | 3578983 | 3580101 - | 372 | 53720611 | 3091659 proB  | COG0263E           | CGGCTTCGTCATCGCCCATGAAGC    | 1 | 87  | 87  | 1   | 100 Bm_ATCC23344_chr1 | 3510148 | 2625817 | 2625903 | 100 | 435 | 4.80E-15 - |
| BPSL3003 | putative conserved GTP-binding protein               | 3580186 | 3581304 - | 372 | 53720612 | 3092862 -     | COG0536R           | AAGCATCGCGTGCGCGCTTCGGCC    | 1 | 103 | 103 | 1   | 100 Bm_ATCC23344_chr1 | 3510148 | 2627020 | 2627122 | 100 | 515 | 1.20E-18 - |
| BPSL3005 | 50S ribosomal protein L21                            | 3581781 | 3582092 - | 103 | 53720614 | 3093772 rplU  | NULL               | CGCAGACGCGGATGAGCTTTGACTGT  | 1 | 103 | 103 | 1   | 100 Bm_ATCC23344_chr1 | 3510148 | 2627808 | 2627910 | 100 | 515 | 1.20E-18 - |
| BPSL3006 | octaprenyl-diphosphate synthase                      | 3582308 | 3583306 + | 332 | 53720615 | 3092512 ispB  | COG0142H           | CGCGGACATTCGCGCGCAACGGCTA   | 1 | 103 | 1   | 103 | 100 Bm_ATCC23344_chr1 | 3510148 | 2627926 | 2628028 | 100 | 515 | 1.20E-18 + |
| BPSL3007 | hypothetical protein BPSL3007                        | 3583587 | 3584882 + | 431 | 53720616 | 3092385 -     | COG                |                             |   |     |     |     |                       |         |         |         |     |     |            |

|          |                                                     |         |           |      |          |              |                    |                             |   |     |     |     |         |                   |         |         |         |     |     |          |   |
|----------|-----------------------------------------------------|---------|-----------|------|----------|--------------|--------------------|-----------------------------|---|-----|-----|-----|---------|-------------------|---------|---------|---------|-----|-----|----------|---|
| BPSL3055 | uracil-DNA glycosylase                              | 3644787 | 3645524 + | 245  | 53720664 | 3091556 ung  | COG0692L           | CCACCTCTTTCGCGATGACCAAGCC   | 1 | 95  | 82  | 1   | 89.1304 | 8m_ATCC23344_chr2 | 2325379 | 539092  | 539173  | 97  | 392 | 2.80E-13 | - |
| BPSL3056 | acyl carrier protein phosphodiesterase              | 3645743 | 3646339 - | 198  | 53720665 | 3094516 acpD | COG1182I           | CAATCCGTGACCCGCGACCCGGT     | 1 | 103 | 1   | 103 | 100     | 8m_ATCC23344_chr2 | 2325379 | 537437  | 537539  | 99  | 506 | 2.00E-18 | + |
| BPSL3057 | family M61 unassigned peptidase                     | 3646478 | 3648316 - | 612  | 53720666 | 3094618 -    | COG3975R           | CGCGGGCTTTCTCGATCGCGGAAT    | 1 | 102 | 1   | 102 | 100     | 8m_ATCC23344_chr2 | 2325379 | 535470  | 535571  | 99  | 501 | 3.30E-18 | + |
| BPSL3058 | thiol:disulfide interchange protein DsbC            | 3648416 | 3649153 - | 245  | 53720667 | 3094725 dsbC | COG1651O           | CGCGCGGCGCGAACCTTCGCGGG     | 1 | 95  | 1   | 95  | 100     | 8m_ATCC23344_chr2 | 2325379 | 534640  | 534734  | 100 | 475 | 4.90E-17 | + |
| BPSL3059 | hypothetical protein BPSL3059                       | 3649246 | 3650427 - | 393  | 53720668 | 3094619 -    | COG0654HC          | CGCGGCCGCGCGGAAACCGGCAC     | 1 | 103 | 1   | 103 | 100     | 8m_ATCC23344_chr2 | 2325379 | 533358  | 533460  | 100 | 515 | 7.70E-19 | + |
| BPSL3060 | putative lipoprotein                                | 3650742 | 3650870 + | 42   | 53720669 | 3094267 -    | NULL               | CGCCGCGATTTCGCGGCACAGTTT    | 1 | 103 | 103 | 1   | 100     | 8m_ATCC23344_chr2 | 2325379 | 533141  | 533243  | 99  | 506 | 2.00E-18 | - |
| BPSL3061 | hypothetical protein BPSL3061                       | 3651327 | 3651692 + | 121  | 53720670 | 3094268 -    | NULL               | CTTATCTGATTCTTCGATCGCGTGT   | 1 | 103 | 103 | 1   | 100     | 8m_ATCC23344_chr2 | 2325379 | 532556  | 532658  | 99  | 506 | 2.00E-18 | - |
| BPSL3062 | putative GTP-binding protein                        | 3652194 | 3653288 + | 364  | 53720671 | 3094493 -    | COG0012J           | CGCCGCCGGATTTCGTCCAGCAAC    | 1 | 103 | 103 | 1   | 100     | 8m_ATCC23344_chr2 | 2325379 | 531721  | 531823  | 100 | 515 | 7.70E-19 | - |
| BPSL3064 | hypothetical protein BPSL3064                       | 3654507 | 3655250 + | 247  | 53720673 | 3091973 -    | NULL               | CGCGAAATCCATGCCCGGCTATCGA   | 1 | 103 | 103 | 1   | 100     | 8m_ATCC23344_chr2 | 2325379 | 529413  | 529515  | 99  | 506 | 2.00E-18 | - |
| BPSL3065 | putative amino acid permease                        | 3655322 | 3656725 - | 467  | 53720674 | 3091974 -    | COG1113E           | CGCGCGCATATTGGCGCGCGACGG    | 1 | 103 | 1   | 103 | 100     | 8m_ATCC23344_chr2 | 2325379 | 527097  | 527199  | 99  | 506 | 2.00E-18 | + |
| BPSL3066 | putative hydrolase                                  | 3657986 | 3658966 - | 326  | 53720675 | 3091837 -    | COG0584C           | CGCCGACGGCATCTTAACCGCGGGI   | 1 | 103 | 1   | 103 | 100     | 8m_ATCC23344_chr2 | 2325379 | 524862  | 524964  | 100 | 515 | 7.70E-19 | - |
| BPSL3067 | putative ABC transporter ATP-binding subunit        | 3659704 | 3661371 + | 555  | 53720676 | 3091838 -    | COG0488R           | GCACGGCCACCGCGCGCTTCATGT    | 1 | 103 | 103 | 1   | 100     | 8m_ATCC23344_chr2 | 2325379 | 524222  | 524324  | 99  | 506 | 2.00E-18 | - |
| BPSL3069 | putative hydrolase                                  | 3662327 | 3662854 - | 175  | 53720678 | 3094708 -    | COG1335Q           | CGATGTGATGTTCGGTGACGGTGT    | 1 | 103 | 1   | 103 | 100     | 8m_ATCC23344_chr2 | 2325379 | 520974  | 521076  | 98  | 497 | 5.00E-18 | + |
| BPSL3071 | hypothetical protein BPSL3071                       | 3664866 | 3665120 - | 84   | 53720680 | 3091684 -    | NULL               | CGCCGAGCGGCATCGCGCGGGCT     | 1 | 103 | 1   | 103 | 100     | 8m_ATCC23344_chr2 | 2325379 | 518726  | 518828  | 99  | 506 | 2.00E-18 | + |
| BPSL3072 | glutamyl-tRNA reductase                             | 3665689 | 3667014 + | 441  | 53720681 | 3094369 hemA | COG0373H           | ACGCGCGAGCGCGCGCGGGAAGAI    | 1 | 103 | 103 | 1   | 100     | 8m_ATCC23344_chr2 | 2325379 | 518251  | 518353  | 98  | 497 | 5.00E-18 | - |
| BPSL3073 | peptide chain release factor 1                      | 3667081 | 3668163 + | 360  | 53720682 | 3092221 prfA | COG0216I           | CGCGCGCCGCGCGCGCGCTCTCTC    | 1 | 69  | 69  | 1   | 100     | 8m_ATCC23344_chr2 | 2325379 | 516859  | 516927  | 100 | 345 | 3.70E-11 | - |
| BPSL3075 | hypothetical protein BPSL3075                       | 3669144 | 3669452 + | 102  | 53720684 | 3093730 -    | COG0278O           | CACGCGCGCGCGCGCGCGCGCGCC    | 1 | 82  | 82  | 1   | 100     | 8m_ATCC23344_chr2 | 2325379 | 514796  | 514877  | 100 | 410 | 4.30E-14 | - |
| BPSL3078 | putative amino-acid permease                        | 3671584 | 3673185 - | 533  | 53720687 | 3091697 -    | COG0531E           | CCCGATCGGGGCAACCGTCTCCAC    | 1 | 103 | 1   | 103 | 100     | 8m_ATCC23344_chr2 | 2325379 | 510733  | 510835  | 100 | 515 | 7.70E-19 | + |
| BPSL3079 | cold shock-like protein CspD                        | 3673619 | 3673822 + | 67   | 53720688 | 3094215 cspD | NULL               | TTGCCCACTCAACGGTATCGCGTGT   | 1 | 103 | 103 | 1   | 100     | 8m_ATCC23344_chr1 | 3510148 | 2881740 | 2881842 | 100 | 515 | 1.20E-18 | - |
| BPSL3081 | putative oxidoreductase                             | 3675933 | 3676550 - | 205  | 53720690 | 3094253 -    | COG0778C           | TACCGCGATTGTGATTCGCGCGCAC   | 1 | 103 | 103 | 1   | 100     | 8m_ATCC23344_chr1 | 3510148 | 2892841 | 2892943 | 100 | 515 | 1.20E-18 | - |
| BPSL3082 | hypothetical protein BPSL3082                       | 3677024 | 3678307 - | 427  | 53720691 | 3092025 -    | NULL               | GCAACAACATTGTGACCATCGGGTA   | 1 | 103 | 103 | 1   | 100     | 8m_ATCC23344_chr1 | 3510148 | 2894609 | 2894711 | 100 | 515 | 1.20E-18 | - |
| BPSL3083 | putative TetR-family transcriptional regulator      | 3678466 | 3679110 + | 214  | 53720692 | 3092026 -    | COG1309K           | CAATTCGCGGATCTTGTTTACCGAT   | 1 | 103 | 1   | 103 | 100     | 8m_ATCC23344_chr1 | 3510148 | 2894670 | 2894772 | 99  | 506 | 3.00E-18 | + |
| BPSL3084 | hypothetical protein BPSL3084                       | 3679455 | 3680078 + | 207  | 53720693 | 3092839 -    | NULL               | CACGCGTCGTATCAGTCGTCATCT    | 1 | 103 | 1   | 103 | 100     | 8m_ATCC23344_chr1 | 3510148 | 2895652 | 2895754 | 99  | 506 | 3.00E-18 | + |
| BPSL3085 | hypothetical protein BPSL3085                       | 3680163 | 3681059 - | 298  | 53720694 | 3092840 -    | NULL               | CGCGCGGATGGTTTTTCGGTAAAGC   | 1 | 103 | 103 | 1   | 100     | 8m_ATCC23344_chr1 | 3510148 | 2897354 | 2897456 | 100 | 515 | 1.20E-18 | - |
| BPSL3086 | hypothetical protein BPSL3086                       | 3681187 | 3682377 - | 396  | 53720695 | 3094309 -    | COG2890J           | TTGCCCGCGCGCGGTGCGTGACCI    | 1 | 103 | 103 | 1   | 100     | 8m_ATCC23344_chr1 | 3510148 | 2898672 | 2898774 | 97  | 488 | 1.90E-17 | - |
| BPSL3087 | putative acyltransferase                            | 3682680 | 3683882 - | 400  | 53720696 | 3094310 -    | COG1835I           | CGCGCGCTGACTGATCGATCTCGCC   | 1 | 103 | 103 | 1   | 100     | 8m_ATCC23344_chr1 | 3510148 | 2900177 | 2900279 | 99  | 506 | 3.00E-18 | - |
| BPSL3088 | hypothetical protein BPSL3088                       | 3684236 | 3684682 - | 148  | 53720697 | 3094612 -    | NULL               | TTAAATGCGCGGTCTCTCGCGCCCG   | 1 | 103 | 103 | 1   | 100     | 8m_ATCC23344_chr1 | 3510148 | 2900942 | 2901045 | 99  | 505 | 3.30E-18 | - |
| BPSL3089 | family M1 unassigned peptidase                      | 3685343 | 3687508 + | 721  | 53720698 | 3094310 tatA | COG0308E           | CGGGGATAATTAATTCTTCGTCGCCGA | 1 | 103 | 1   | 103 | 100     | 8m_ATCC23344_chr1 | 3510148 | 2901506 | 2901608 | 99  | 506 | 3.00E-18 | + |
| BPSL3090 | hypothetical protein BPSL3090                       | 3688531 | 3688800 + | 89   | 53720699 | 3094158 -    | NULL               | CGGTGTGCGACGCGCACGCGCTCGC   | 1 | 103 | 1   | 103 | 100     | 8m_ATCC23344_chr1 | 3510148 | 2904694 | 2904796 | 100 | 515 | 1.20E-18 | + |
| BPSL3091 | hypothetical protein BPSL3091                       | 3688903 | 3689133 + | 76   | 53720700 | 3094159 -    | NULL               | GGCATGCGGATGATCGATTGAGCGI   | 1 | 103 | 1   | 103 | 100     | 8m_ATCC23344_chr1 | 3510148 | 2905066 | 2905168 | 100 | 515 | 1.20E-18 | + |
| BPSL3092 | putative bacteriocin secretion protein              | 3689749 | 3691017 + | 422  | 53720701 | 3094505 -    | NULL               | CGCGCGGCGACGCGCGCGCGCGCG    | 1 | 103 | 1   | 103 | 100     | 8m_ATCC23344_chr1 | 3510148 | 2905912 | 2906014 | 99  | 506 | 3.00E-18 | + |
| BPSL3096 | putative bacteriophage-related peptidase            | 3696333 | 3696911 + | 192  | 53720705 | 3092435 -    | NULL               | CGCAAGAATGTCCGCGTCCACTTTA   | 1 | 103 | 1   | 103 | 100     | 8m_ATCC23344_chr1 | 3510148 | 2912467 | 2912569 | 100 | 515 | 1.20E-18 | + |
| BPSL3100 | hypothetical protein BPSL3100                       | 3703205 | 3704326 - | 373  | 53720709 | 3093360 -    | COG3515S           | GGCGCGCGCGCGCGCGCGCATGCAC   | 1 | 92  | 92  | 1   | 100     | 8m_ATCC23344_chr1 | 3510148 | 2920551 | 2920642 | 100 | 460 | 3.50E-16 | - |
| BPSL3103 | hypothetical protein BPSL3103                       | 3708183 | 3710009 - | 608  | 53720712 | 3092705 -    | COG3519S           | CGCGTATCGCGCGCGGTGCGCGGCG   | 1 | 94  | 94  | 1   | 100     | 8m_ATCC23344_chr1 | 3510148 | 2926258 | 2926351 | 100 | 470 | 1.30E-17 | - |
| BPSL3120 | putative stringent starvation protein A             | 3725547 | 3726158 - | 203  | 53720727 | 3092038 -    | COG0625O           | TCCAGCCGAGACTGCGGTGGGGGCG   | 1 | 95  | 95  | 1   | 100     | 8m_ATCC23344_chr1 | 3510148 | 2792052 | 2792146 | 100 | 475 | 7.40E-17 | - |
| BPSL3123 | ubiquinol-cytochrome c reductase iron-sulfur subuni | 3728415 | 3729038 - | 207  | 53720730 | 3094363 petA | COG0723C           | AGGTATTTAACTCGTCGGGTCTTGTA  | 1 | 103 | 103 | 1   | 100     | 8m_ATCC23344_chr1 | 3510148 | 2794932 | 2795034 | 100 | 515 | 1.20E-18 | - |
| BPSL3128 | twin arginine translocase protein A                 | 3732947 | 3733180 - | 77   | 53720735 | 3094102 tatA | COG1826U           | GATGGCGGCGCGCGCCCATCGGA     | 1 | 91  | 91  | 1   | 100     | 8m_ATCC23344_chr1 | 3510148 | 2799065 | 2799155 | 100 | 455 | 6.00E-16 | - |
| BPSL3130 | hypothetical protein BPSL3130                       | 3733663 | 3734052 - | 129  | 53720737 | 3091601 -    | COG3671S           | GCCAATGCGCGCACGCGCGCGGTA    | 1 | 55  | 55  | 1   | 100     | 8m_ATCC23344_chr1 | 3510148 | 2799937 | 2799991 | 100 | 275 | 8.00E-08 | - |
| BPSL3133 | imidazole glycerol phosphate synthase subunit HisF  | 3734883 | 3735671 - | 262  | 53720740 | 3091767 hisF | COG0107E           | CGCGCGCTCTCGGCACGACGCTTTI   | 1 | 70  | 70  | 1   | 100     | 8m_ATCC23344_chr1 | 3510148 | 2801556 | 2801625 | 100 | 350 | 3.30E-11 | - |
| BPSL3134 | 1-(5-phosphoribosyl)-5-                             | 3735739 | 3736494 - | 251  | 53720741 | 3093946 hisA | COG0106E           | CAGAAAGATGTGATCTAAACTGACI   | 1 | 103 | 103 | 1   | 100     | 8m_ATCC23344_chr1 | 3510148 | 2802379 | 2802481 | 100 | 515 | 1.20E-18 | - |
| BPSL3136 | hypothetical protein BPSL3136                       | 3737300 | 3737920 - | 206  | 53720743 | 3091602 -    | COG2095U           | TTTCGCGCGCGGCAAGCAACGACCI   | 1 | 58  | 58  | 1   | 100     | 8m_ATCC23344_chr1 | 3510148 | 2803805 | 2803862 | 100 | 290 | 1.70E-08 | - |
| BPSL3137 | imidazoleglycerol-phosphate dehydratase             | 3737976 | 3738563 - | 195  | 53720744 | 3092887 hisB | NULL               | CGCGCCACCCGCGGCGCGCGCTTC    | 1 | 66  | 66  | 1   | 100     | 8m_ATCC23344_chr1 | 3510148 | 2804448 | 2804513 | 100 | 330 | 2.60E-10 | - |
| BPSL3138 | histidinol-phosphate aminotransferase               | 3738627 | 3739697 - | 356  | 53720745 | 3092888 hisC | COG0079E           | ACCCGAGACGCGCGCGGCGAGGCGT   | 1 | 103 | 103 | 1   | 100     | 8m_ATCC23344_chr1 | 3510148 | 2805582 | 2805684 | 99  | 506 | 3.00E-18 | - |
| BPSL3142 | BolA-like protein                                   | 3743248 | 3743487 - | 79   | 53720749 | 3094146 -    | COG5007K           | TATGAAGGACGACGCGCGCGCGCC    | 1 | 88  | 88  | 1   | 100     | 8m_ATCC23344_chr1 | 3510148 | 2809371 | 2809458 | 100 | 440 | 2.80E-15 | - |
| BPSL3144 | putative ABC transporter ATP-binding subunit        | 3744325 | 3745266 - | 313  | 53720751 | 3094138 -    | COG1131V           | GCCTTGACGCGTTTGCCCTATAATCA  | 1 | 103 | 103 | 1   | 100     | 8m_ATCC23344_chr1 | 3510148 | 2811150 | 2811252 | 100 | 515 | 1.20E-18 | - |
| BPSL3146 | hypothetical protein BPSL3146                       | 3745813 | 3746445 - | 210  | 53720753 | 3094199 -    | COG2854Q           | CGGTTACAGCGCGGAACGATTCGTG   | 1 | 103 | 103 | 1   | 100     | 8m_ATCC23344_chr1 | 3510148 | 2812329 | 2812431 | 100 | 515 | 1.20E-18 | - |
| BPSL3150 | putative ABC transporter ATP-binding subunit        | 3748904 | 3749722 - | 272  | 53720757 | 3094146 -    | COG1127Q           | CTTGGAATTTCTGACTGGAGCGCC    | 1 | 102 | 102 | 1   | 100     | 8m_ATCC23344_chr1 | 3510148 | 2815606 | 2815707 | 99  | 501 | 5.00E-18 | - |
| BPSL3152 | thiazole synthase                                   | 3750913 | 3751728 - | 271  | 53720759 | 3092619 thiG | COG2022H           | CGCGCGCGCGCGCGCGGCTCGGCC    | 1 | 55  | 55  | 1   | 100     | 8m_ATCC23344_chr1 | 3510148 | 2817621 | 2817675 | 98  | 266 | 2.10E-07 | - |
| BPSL3154 | putative thiamine biosynthesis oxidoreductase ThiO  | 3752027 | 3753154 - | 375  | 53720761 | 3092334 thiO | COG0665E           | GTCCTTTTGGGTGCGTGTGAGCGGT   | 1 | 103 | 103 | 1   | 100     | 8m_ATCC23344_chr1 | 3510148 | 2819047 | 2819149 | 99  | 506 | 3.00E-18 | - |
| BPSL3155 | putative ABC transporter                            | 3753709 | 3755529 + | 606  | 53720762 | 3094147 -    | COG4178R           | GGAAATCGCGCGCGCGCGGACATC    | 1 | 103 | 1   | 103 | 100     | 8m_ATCC23344_chr1 | 3510148 | 2819504 | 2819606 | 100 | 515 | 1.20E-18 | + |
| BPSL3157 | putative sodium/amino acid symporter                | 3756315 | 3757826 - | 503  | 53720764 | 3092183 -    | COG1115E           | CATTTTTGAAGAGTTCGGTGACGAT   | 1 | 103 | 103 | 1   | 100     | 8m_ATCC23344_chr1 | 3510148 | 2823750 | 2823852 | 97  | 488 | 1.90E-17 | - |
| BPSL3159 | glutamate synthase large subunit                    | 3759667 | 3764370 - | 1567 | 53720766 | 3092803 gltI | COG0067E, COG0069E | CCCTCGCCGCGCGCGGCGCATCGGA   | 1 | 103 | 103 | 1   | 100     | 8m_ATCC23344_chr1 |         |         |         |     |     |          |   |

|          |                                                 |         |           |       |          |           |      |                    |                             |   |     |     |     |     |                   |         |         |         |     |     |            |
|----------|-------------------------------------------------|---------|-----------|-------|----------|-----------|------|--------------------|-----------------------------|---|-----|-----|-----|-----|-------------------|---------|---------|---------|-----|-----|------------|
| BPSL3223 | S0S ribosomal protein L10                       | 3825356 | 3825853 - | 165   | 53720831 | 3093181   | rpL  | COG0244J           | TCGCTGGTCTCCAGCGGAAATACTC   | 1 | 103 | 103 | 1   | 100 | 8m_ATCC23344_chr1 | 3510148 | 2748088 | 2748190 | 99  | 506 | 3.00E-18 - |
| BPSL3225 | S0S ribosomal protein L11                       | 3826850 | 3827281 - | 143   | 53720833 | 3092790   | rpIK | NULL               | ACGGCCCGCGGTTAAATGGCCGTTGAK | 1 | 103 | 103 | 1   | 100 | 8m_ATCC23344_chr1 | 3510148 | 2749516 | 2749618 | 100 | 515 | 1.20E-18 + |
| BPSL3227 | translocase                                     | 3827986 | 3828366 - | 126   | 53720835 | 3092983   | secE | COG0690U           | GCAGAGCGTCGCTCTCAAAACCGC    | 1 | 103 | 103 | 1   | 100 | 8m_ATCC23344_chr1 | 3510148 | 2750601 | 2750703 | 99  | 506 | 3.00E-18 - |
| BPSL3228 | elongation factor Tu                            | 3828544 | 3829734 - | 396   | 53720836 | 3092631   | tuf  | COG0050J           | GGGAGAGGTGCGCAGTTCGATCTC    | 1 | 103 | 103 | 1   | 100 | 8m_ATCC23344_chr1 | 3510148 | 2751969 | 2752071 | 100 | 515 | 1.20E-18 - |
| BPSL3229 | hypothetical protein BPSL3229                   | 3836722 | 3837999 - | 425   | 53720837 | 3092567 - |      | COG2755E           | AGCAATGCCCGCCGCCGCCACCGCC   | 1 | 103 | 103 | 1   | 100 | 8m_ATCC23344_chr1 | 3510148 | 2679638 | 2679740 | 100 | 515 | 1.20E-18 - |
| BPSL3230 | phenylacetic acid degradation protein PaaA      | 3838612 | 3839610 + | 332   | 53720838 | 3091478   | paaA | COG33965           | CTGCACCGCGGAATCTTGCCCATCC   | 1 | 103 | 1   | 103 | 100 | 8m_ATCC23344_chr1 | 3510148 | 2680727 | 2680829 | 97  | 488 | 1.90E-17 + |
| BPSL3231 | phenylacetic acid degradation protein PaaB      | 3839673 | 3839957 - | 94    | 53720839 | 3091479   | paaB | NULL               | CGCGCATACGCGCGCGCAAGCGCC    | 1 | 65  | 1   | 65  | 100 | 8m_ATCC23344_chr1 | 3510148 | 2681826 | 2681890 | 100 | 325 | 4.40E-10 + |
| BPSL3237 | hypothetical protein BPSL3237                   | 3844299 | 3844985 + | 228   | 53720845 | 3094132 - |      | NULL               | CTCTACGCTACCAATCGCGTGACTT   | 1 | 103 | 1   | 103 | 100 | 8m_ATCC23344_chr1 | 3510148 | 2686414 | 2686516 | 98  | 497 | 7.60E-18 + |
| BPSL3238 | putativeAsnC-family transcriptional regulator   | 3845104 | 3845619 - | 171   | 53720846 | 3094133 - |      | COG1522K           | AAAGTGTAGCGGGAGGCGCGGAGTG   | 1 | 103 | 103 | 1   | 100 | 8m_ATCC23344_chr1 | 3510148 | 2687831 | 2687933 | 99  | 506 | 3.00E-18 - |
| BPSL3239 | 4-hydroxyphenylpyruvate dioxygenase             | 3845771 | 3846868 + | 365   | 53720847 | 3091429 - |      | COG3185ER          | TTCGGCGACCAAGTCTGCAAGTTTTC  | 1 | 103 | 1   | 103 | 100 | 8m_ATCC23344_chr1 | 3510148 | 2687885 | 2687987 | 100 | 515 | 1.20E-18 + |
| BPSL3240 | putative outer membrane protein                 | 3847104 | 3847301 - | 65    | 53720848 | 3091430 - |      | NULL               | CGTTTACCGTTAGTCTCTAGGGCCCC  | 1 | 103 | 103 | 1   | 100 | 8m_ATCC23344_chr1 | 3510148 | 2689513 | 2689615 | 99  | 506 | 3.00E-18 + |
| BPSL3241 | indolepyruvate ferredoxin oxidoreductase        | 3847621 | 3851202 + | 1193  | 53720849 | 3091567 - |      | COG1014C, COG4231C | ATCGAAGCAAAACCCGCCAATATTTC  | 1 | 103 | 1   | 103 | 100 | 8m_ATCC23344_chr1 | 3510148 | 2689735 | 2689837 | 100 | 515 | 1.20E-18 + |
| BPSL3242 | phosphate acetyltransferase                     | 3851722 | 3853992 - | 756   | 53720850 | 3091568 - |      | COG0280C, COG0281C | CGGACGCCGCGAGTCAGCAATCCCT   | 1 | 103 | 103 | 1   | 100 | 8m_ATCC23344_chr1 | 3510148 | 2696169 | 2696271 | 100 | 515 | 1.20E-18 - |
| BPSL3243 | orotate phosphoribosyltransferase               | 3854521 | 3855207 + | 228   | 53720851 | 3093840   | pyrE | COG0461F           | ACGCCCATCTGGCCCGCCACCCGGG   | 1 | 103 | 1   | 103 | 100 | 8m_ATCC23344_chr1 | 3510148 | 2696600 | 2696702 | 100 | 515 | 1.20E-18 + |
| BPSL3244 | putative lipoprotein                            | 3855508 | 3856104 + | 198   | 53720852 | 3091870 - |      | COG1881R           | CCCCCAATGCTAGACTTGCCCAATC   | 1 | 103 | 1   | 103 | 100 | 8m_ATCC23344_chr1 | 3510148 | 2697588 | 2697690 | 100 | 515 | 1.20E-18 + |
| BPSL3245 | putative flavoprotein (regulator)               | 3856491 | 3857066 + | 314   | 53720853 | 3091871 - |      | COG0655R           | CTCCGCCAGCGTTTCGGCGACCAACG  | 1 | 103 | 1   | 103 | 100 | 8m_ATCC23344_chr1 | 3510148 | 2698567 | 2698669 | 100 | 515 | 1.20E-18 + |
| BPSL3246 | N-acetyl-gamma-glutamyl-phosphate reductase     | 3857219 | 3858163 + | 191   | 53720854 | 3092981   | argC | COG0002E           | TTTTTTCGGCGCAACCGGTATCCAGC  | 1 | 103 | 1   | 103 | 100 | 8m_ATCC23344_chr1 | 3510148 | 2699295 | 2699397 | 100 | 515 | 1.20E-18 + |
| BPSL3247 | putative lipoprotein                            | 3858608 | 3860011 + | 467   | 53720855 | 3091902 - |      | NULL               | AATGTGTTAAATCGACTCGGTAGAA   | 1 | 103 | 1   | 103 | 100 | 8m_ATCC23344_chr1 | 3510148 | 2700684 | 2700786 | 100 | 515 | 1.20E-18 + |
| BPSL3248 | putative lipoprotein                            | 3860137 | 3861387 + | 416   | 53720856 | 3091903 - |      | NULL               | ACACGGCTGCGGTCGGCGCCGCCGC   | 1 | 103 | 1   | 103 | 100 | 8m_ATCC23344_chr1 | 3510148 | 2702213 | 2702316 | 99  | 505 | 3.30E-18 + |
| BPSL3256 | putative amino acid permease                    | 3871231 | 3872637 + | 468   | 53720866 | 3093735 - |      | COG1113E           | CTCCCGCTCGCCGCTCATCGAGACGA  | 1 | 103 | 1   | 103 | 100 | 8m_ATCC23344_chr1 | 3510148 | 2883528 | 2883630 | 99  | 506 | 3.00E-18 + |
| BPSL3273 | putative phosphosugar isomerase                 | 3889496 | 3890074 - | 192   | 53720883 | 3092692 - |      | COG0279G           | TGCGGGCAGCGCTCGGGCGGCGGGK   | 1 | 103 | 103 | 1   | 100 | 8m_ATCC23344_chr1 | 3510148 | 2887105 | 2887207 | 100 | 515 | 1.20E-18 - |
| BPSL3276 | putative RlpA-like lipoprotein                  | 3891660 | 3892295 - | 211   | 53720886 | 3091331 - |      | COG0797M           | CGGCCCAATGCAAGCGCCGCCCGGC   | 1 | 103 | 1   | 103 | 100 | 8m_ATCC23344_chr1 | 3510148 | 3001421 | 3001523 | 100 | 515 | 1.20E-18 + |
| BPSL3277 | metallobeta-lactamase superfamily protein       | 3892896 | 3893540 + | 214   | 53720887 | 3093505 - |      | COG0491R           | TGATTCTCTCTATGATCGAAACAAT   | 1 | 103 | 103 | 1   | 100 | 8m_ATCC23344_chr1 | 3510148 | 3000918 | 3001020 | 100 | 515 | 1.20E-18 - |
| BPSL3279 | putative AsnC-family transcriptional regulator  | 3894251 | 3894742 + | 163   | 53720889 | 3093067 - |      | COG1522K           | CGAATATCGCTCGTCTTCAACGGCTC  | 1 | 60  | 60  | 1   | 100 | 8m_ATCC23344_chr1 | 3510148 | 2999563 | 2999622 | 98  | 291 | 1.50E-08 - |
| BPSL3280 | putative cation efflux protein                  | 3894921 | 3896111 - | 96    | 53720890 | 3093068 - |      | COG0053P           | TCATAAGCGAATGATTGTTGTTGTTT  | 1 | 103 | 1   | 103 | 100 | 8m_ATCC23344_chr1 | 3510148 | 2997605 | 2997707 | 99  | 506 | 3.00E-18 + |
| BPSL3281 | putative HNS-like transcriptional regulator     | 3896351 | 3896644 - | 397   | 53720891 | 3092211 - |      | COG2916R           | TTTTTGTGCTTAACTGTTGACCAAT   | 1 | 103 | 1   | 103 | 100 | 8m_ATCC23344_chr1 | 3510148 | 2997072 | 2997174 | 100 | 515 | 1.20E-18 + |
| BPSL3282 | hypothetical protein BPSL3282                   | 3897029 | 3897835 - | 268   | 53720892 | 3092212 - |      | COG0748P           | AGCGCGGTGCGACTTCGCTGCGCTC   | 1 | 103 | 1   | 103 | 100 | 8m_ATCC23344_chr1 | 3510148 | 2995881 | 2995983 | 100 | 515 | 1.20E-18 + |
| BPSL3283 | hypothetical protein BPSL3283                   | 3898112 | 3899230 + | 372   | 53720893 | 3094655 - |      | NULL               | CCAGCTTCGCGTGTCCGACAGCGCC   | 1 | 103 | 103 | 1   | 100 | 8m_ATCC23344_chr1 | 3510148 | 2995702 | 2995804 | 100 | 515 | 1.20E-18 - |
| BPSL3284 | putative secreted substrate binding protein     | 3899419 | 3900561 - | 380   | 53720894 | 3094656 - |      | COG0683E           | AATGCAACCGCGCAATGCCAAGTG    | 1 | 103 | 1   | 103 | 100 | 8m_ATCC23344_chr1 | 3510148 | 2993153 | 2993255 | 100 | 515 | 1.20E-18 + |
| BPSL3286 | putative dieneolactone hydrolase                | 3902445 | 3903137 + | 230   | 53720896 | 3092010 - |      | COG0412Q           | TTCCGGCGGCTGCAACGACGCGGG    | 1 | 103 | 1   | 103 | 100 | 8m_ATCC23344_chr1 | 3510148 | 2929369 | 2929471 | 100 | 515 | 1.20E-18 + |
| BPSL3287 | putative amidase                                | 3903233 | 3904723 + | 496   | 53720897 | 3093499 - |      | NULL               | CGCGCGCGCGGATGCGCGCGCTCGC   | 1 | 98  | 1   | 98  | 100 | 8m_ATCC23344_chr1 | 3510148 | 2930162 | 2930260 | 98  | 480 | 4.40E-17 + |
| BPSL3289 | hypothetical protein BPSL3289                   | 3905755 | 3906108 - | 117   | 53720899 | 3093500 - |      | COG1950S           | CGCGCGCATCGGACGCGCAACCGC    | 1 | 103 | 103 | 1   | 100 | 8m_ATCC23344_chr1 | 3510148 | 2933131 | 2933233 | 99  | 506 | 3.00E-18 - |
| BPSL3290 | S-adenosyl-L-homocysteine hydrolase             | 3906272 | 3907693 - | 473   | 53720900 | 3092196   | ahcY | COG0499H           | CATCGTCGATAGCGCGCGATCGTT    | 1 | 103 | 103 | 1   | 100 | 8m_ATCC23344_chr1 | 3510148 | 2934716 | 2934818 | 99  | 506 | 3.00E-18 - |
| BPSL3295 | flagellar biosynthetic protein FlhB             | 3913455 | 3914672 - | 405   | 53720905 | 3094572   | flhB | COG1377NU          | CGAGAAATACCCCGGTTTCCCGCTG   | 1 | 103 | 103 | 1   | 100 | 8m_ATCC23344_chr1 | 3510148 | 2941687 | 2941789 | 100 | 515 | 1.20E-18 - |
| BPSL3296 | hypothetical protein BPSL3296                   | 3915368 | 3915868 - | 166   | 53720906 | 3094060 - |      | COG3865S           | TGTGTTTGCGATTGCGTCAATGGAAG  | 1 | 103 | 103 | 1   | 100 | 8m_ATCC23344_chr1 | 3510148 | 2942883 | 2942985 | 100 | 515 | 1.20E-18 - |
| BPSL3298 | hypothetical protein BPSL3298                   | 3917382 | 3917885 - | 167   | 53720908 | 3093670 - |      | NULL               | TGAAAGCTTTTCTTCGCTTTCGATT   | 1 | 103 | 103 | 1   | 100 | 8m_ATCC23344_chr1 | 3510148 | 2944846 | 2944948 | 100 | 515 | 1.20E-18 - |
| BPSL3300 | chemotaxis protein CheY                         | 3918813 | 3919241 - | 142   | 53720910 | 3092753   | cheY | NULL               | GTCGCGCTGTGCTGCGGCAAAAC     | 1 | 103 | 103 | 1   | 100 | 8m_ATCC23344_chr1 | 3510148 | 2946202 | 2946304 | 100 | 515 | 1.20E-18 - |
| BPSL3309 | flagellar motor protein                         | 3928654 | 3929514 - | 286   | 53720919 | 3092331   | motA | COG1291N           | ACCCGGGACGCCCGCGGAGGCGGTT   | 1 | 103 | 103 | 1   | 100 | 8m_ATCC23344_chr1 | 3510148 | 2956533 | 2956635 | 100 | 515 | 1.20E-18 - |
| BPSL3310 | flagellar regulon master regulator subunit FlhC | 3929708 | 3930259 - | 183   | 53720920 | 3092108   | flhC | NULL               | CCGGAAGCGCGCGCGCGCGCGCCC    | 1 | 96  | 96  | 1   | 100 | 8m_ATCC23344_chr1 | 3510148 | 2957278 | 2957373 | 98  | 471 | 1.10E-16 - |
| BPSL3311 | transcriptional activator FlhD                  | 3930353 | 3930673 - | 106   | 53720921 | 3092109   | flhD | NULL               | TATAAACAGCCGATTCGCGCCCTT    | 1 | 103 | 103 | 1   | 100 | 8m_ATCC23344_chr1 | 3510148 | 2957692 | 2957794 | 100 | 515 | 1.20E-18 - |
| BPSL3312 | putative glycosyltransferase                    | 3931267 | 3932331 + | 354   | 53720922 | 3092717 - |      | COG0438M           | ACCCGCCGCTGCTGCTCGCGCGGAG   | 1 | 103 | 1   | 103 | 100 | 8m_ATCC23344_chr1 | 3510148 | 2958188 | 2958290 | 99  | 506 | 3.00E-18 + |
| BPSL3313 | HNS-like transcriptional regulator              | 3932435 | 3932731 - | 98    | 53720923 | 3092718 - |      | COG2916R           | CGAAATAATTTTGGTGATTTCGTAG   | 1 | 103 | 103 | 1   | 100 | 8m_ATCC23344_chr1 | 3510148 | 2959750 | 2959852 | 100 | 515 | 1.20E-18 - |
| BPSL3314 | aquaporin Z                                     | 3933037 | 3933741 + | 234   | 53720924 | 3093879   | aqpZ | NULL               | AACCCGTAGGATTTCCTATAATCCA   | 1 | 103 | 1   | 103 | 100 | 8m_ATCC23344_chr1 | 3510148 | 2959598 | 2960060 | 100 | 515 | 1.20E-18 + |
| BPSL3315 | putative Cof-family hydrolase                   | 3933930 | 3934772 - | 280   | 53720925 | 3093598 - |      | COG0561R           | ACCCGATCGGAGCGCGCGCGCGCC    | 1 | 99  | 99  | 1   | 100 | 8m_ATCC23344_chr1 | 3510148 | 2961791 | 2961891 | 95  | 448 | 1.20E-15 - |
| BPSL3316 | hypothetical protein BPSL3316                   | 3934869 | 3935759 - | 296   | 53720926 | 3093599 - |      | COG2971G           | CGCGCAAGCCTGGCCATTCGGCTG    | 1 | 103 | 103 | 1   | 100 | 8m_ATCC23344_chr1 | 3510148 | 2962780 | 2962882 | 99  | 506 | 3.00E-18 + |
| BPSL3317 | DNA-3-methyladenine glycosylase I               | 3935910 | 3936518 + | 202   | 53720927 | 3092286   | tag  | NULL               | TAACTCCGCAACGCTCGCTCGCCG    | 1 | 103 | 1   | 103 | 100 | 8m_ATCC23344_chr1 | 3510148 | 2962833 | 2962935 | 98  | 497 | 7.60E-18 + |
| BPSL3318 | 30S ribosomal protein S21                       | 3936905 | 3937117 - | 70    | 53720928 | 3094653   | rsL  | COG0828J           | GATACCCGCTCGTTGCGTCTGTTC    | 1 | 103 | 103 | 1   | 100 | 8m_ATCC23344_chr1 | 3510148 | 2964138 | 2964240 | 100 | 515 | 1.20E-18 - |
| BPSL3319 | flagellin                                       | 3937675 | 3938841 + | 388   | 53720929 | 3094015   | flfC | COG1344N           | ACCGCGAAATCCTCGCAACGAGCG    | 1 | 103 | 1   | 103 | 100 | 8m_ATCC23344_chr1 | 3510148 | 2964598 | 2964700 | 100 | 515 | 1.20E-18 + |
| BPSL3320 | flagellar hook-associated protein               | 3938991 | 3940511 + | 506   | 53720930 | 3094016   | flfD | COG1345N           | CGGAGCAACACTGCTGTGGCCGCG    | 1 | 103 | 1   | 103 | 100 | 8m_ATCC23344_chr1 | 3510148 | 2965914 | 2966016 | 100 | 515 | 1.20E-18 + |
| BPSL3322 | putative TPR domain protein                     | 3941062 | 3943392 + | 776   | 53720932 | 3091873 - |      | COG0457R, COG3914O | TTGCGCAATTTGGCGGCTCTTCTCT   | 1 | 103 | 1   | 103 | 100 | 8m_ATCC23344_chr1 | 3510148 | 2967985 | 2968087 | 100 | 515 | 1.20E-18 + |
| BPSL3331 | putative outer membrane protein                 | 3950469 | 3950867 - | 132   | 53720941 | 3091768 - |      | NULL               | CACGGCGCGACGAGGATATCGCGC    | 1 | 103 | 103 | 1   | 100 | 8m_ATCC23344_chr1 | 3510148 | 2977891 | 2977993 | 100 | 515 | 1.20E-18 - |
| BPSL3332 | putative amino acid efflux protein              | 3951436 | 3952059 + | 207</ |          |           |      |                    |                             |   |     |     |     |     |                   |         |         |         |     |     |            |

|          |                                                      |         |           |      |          |              |           |                            |   |     |     |     |                       |         |         |         |     |     |            |
|----------|------------------------------------------------------|---------|-----------|------|----------|--------------|-----------|----------------------------|---|-----|-----|-----|-----------------------|---------|---------|---------|-----|-----|------------|
| BPSL3376 | hypothetical protein BPSL3376                        | 4005796 | 4007307 - | 503  | 53720985 | 3092848 -    | NULL      | AGATTAAGAGTACGAGTACAGTGAAC | 1 | 103 | 1   | 103 | 100 Bm_ATCC23344_chr1 | 3510148 | 3076700 | 3076802 | 100 | 515 | 1.20E-18 + |
| BPSL3378 | putative heavy metal resistance membrane ATPase      | 4008608 | 4011118 - | 836  | 53720986 | 3094359 -    | COG2217P  | TGCAATCTCCTTACAAAAGATGTTG  | 1 | 85  | 1   | 85  | 100 Bm_ATCC23344_chr1 | 3510148 | 3072926 | 3073010 | 100 | 425 | 1.40E-14 - |
| BPSL3379 | MerR family regulatory protein                       | 4011201 | 4011632 + | 143  | 53720987 | 3094360 -    | COG0789K  | GCACAACCTCTCGTAAGTACGGGI   | 1 | 85  | 85  | 1   | 100 Bm_ATCC23344_chr1 | 3510148 | 3072923 | 3073007 | 100 | 425 | 1.40E-14 - |
| BPSL3380 | putative PadR transcriptional regulator              | 4011732 | 4012373 + | 213  | 53720988 | 3091546 -    | COG1695K  | CGCGCAAGCCGCGTACGCGCCGGC   | 1 | 102 | 102 | 1   | 100 Bm_ATCC23344_chr1 | 3510148 | 3072392 | 3072493 | 99  | 501 | 5.00E-18 - |
| BPSL3383 | amino acid-binding periplasmic transport protein     | 4013381 | 4014175 - | 264  | 53720989 | 3091948 -    | COG0834ET | CGCGCGCGGTGCGCCGCGCTGCGG   | 1 | 56  | 1   | 56  | 100 Bm_ATCC23344_chr1 | 3510148 | 3069898 | 3069953 | 100 | 280 | 4.80E-08 + |
| BPSL3387 | putative fatty-acid CoA ligase                       | 4018770 | 4020317 + | 515  | 53720993 | 3093894 -    | COG0318IQ | GCGGGCTTGGCCGCGCCGCGCCG    | 1 | 103 | 103 | 1   | 100 Bm_ATCC23344_chr1 | 3510148 | 3065458 | 3065560 | 100 | 515 | 1.20E-18 - |
| BPSL3388 | putative periplasmic amino acid binding transport pr | 4020565 | 4021704 - | 379  | 53720994 | 3093895 -    | COG0683E  | GCAATCCTTGCCCTTCGATTCAAGA  | 1 | 87  | 1   | 87  | 100 Bm_ATCC23344_chr1 | 3510148 | 3062450 | 3062536 | 100 | 435 | 4.80E-15 + |
| BPSL3389 | bifunctional proline dehydrogenase/delta-1-pyrroline | 4021789 | 4025718 - | 1309 | 53720995 | 3092967 putA | COG4230C  | CGCGGTGTGAATCTGGTTGCACCT   | 1 | 103 | 1   | 103 | 100 Bm_ATCC23344_chr1 | 3510148 | 3058420 | 3058522 | 100 | 515 | 1.20E-18 + |
| BPSL3390 | primosome assembly protein PriA                      | 4026183 | 4028450 - | 755  | 53720997 | 3092247 priA | COG1198L  | ATCCAACCAATAGCGCCGAAAGT/G  | 1 | 103 | 1   | 103 | 100 Bm_ATCC23344_chr1 | 3510148 | 3055688 | 3055790 | 100 | 515 | 1.20E-18 - |
| BPSL3391 | uracorphyrinogen decarboxylase                       | 4028891 | 4029985 - | 364  | 53720998 | 3092343 hemE | COG0407H  | TCATAACGGAGCGCGCGGACGCT    | 1 | 103 | 1   | 103 | 100 Bm_ATCC23344_chr1 | 3510148 | 3054153 | 3054255 | 100 | 515 | 1.20E-18 + |
| BPSL3392 | cyclohexadienyl dehydratase                          | 4030125 | 4030910 + | 261  | 53720999 | 3092973 pheC | COG0834ET | CGGACGCGCGCGCCGCGCGGCG     | 1 | 103 | 103 | 1   | 100 Bm_ATCC23344_chr1 | 3510148 | 3054111 | 3054213 | 100 | 515 | 1.20E-18 - |
| BPSL3393 | hypothetical protein BPSL3393                        | 4031110 | 4031424 - | 104  | 53721000 | 3093512 -    | COG1832R  | CCGAGAAAGATTTTGAAACGCATC   | 1 | 103 | 1   | 103 | 100 Bm_ATCC23344_chr1 | 3510148 | 3052714 | 3052816 | 99  | 506 | 3.00E-18 + |
| BPSL3394 | acyl-CoA synthase                                    | 4032011 | 4033741 - | 576  | 53721001 | 3094034 -    | COG0318IQ | TTGATGTCCAGATGCGCTAAGCGG/  | 1 | 103 | 1   | 103 | 100 Bm_ATCC23344_chr1 | 3510148 | 3050397 | 3050499 | 99  | 506 | 3.00E-18 + |
| BPSL3395 | ATP synthase subunit epsilon                         | 4033974 | 4034399 - | 141  | 53721002 | 3093523 atpC | NULL      | CGCGGGGCGCAGAGTAAAGCGCTGA  | 1 | 103 | 1   | 103 | 100 Bm_ATCC23344_chr1 | 3510148 | 3049739 | 3049841 | 99  | 506 | 3.00E-18 - |
| BPSL3396 | ATP synthase subunit B                               | 4034643 | 4036037 - | 464  | 53721003 | 3093524 atpD | COG0055C  | CGCGGCACGCGCGACGCGCGCTGC   | 1 | 82  | 1   | 82  | 100 Bm_ATCC23344_chr1 | 3510148 | 3047936 | 3048017 | 100 | 410 | 6.40E-14 + |
| BPSL3400 | ATP synthase subunit B                               | 4039194 | 4039634 - | 146  | 53721007 | 3092776 atpF | COG0711C  | CGCTGATCGAATCGAATCTCGATAGC | 1 | 103 | 1   | 103 | 100 Bm_ATCC23344_chr1 | 3510148 | 3043418 | 3044420 | 100 | 515 | 1.20E-18 + |
| BPSL3401 | ATP synthase subunit C                               | 4039792 | 4040067 - | 91   | 53721008 | 3094555 atpE | COG0636C  | AGCGCTGCGGGCAAAAGATGTTT/   | 1 | 73  | 1   | 73  | 100 Bm_ATCC23344_chr1 | 3510148 | 3043915 | 3043987 | 100 | 365 | 6.90E-12 + |
| BPSL3402 | ATP synthase subunit A                               | 4040138 | 4041007 - | 289  | 53721009 | 3092611 atpB | NULL      | AAAACAGCGCGCGCGGGTTCGAC    | 1 | 97  | 1   | 97  | 100 Bm_ATCC23344_chr1 | 3510148 | 3042951 | 3043047 | 100 | 485 | 2.60E-17 + |
| BPSL3403 | putative ATP synthase protein I Atpl                 | 4041102 | 4041632 - | 176  | 53721010 | 3094035 -    | COG3312C  | GCAACTATCGCTTACAATCGCCGCG  | 1 | 103 | 1   | 103 | 100 Bm_ATCC23344_chr1 | 3510148 | 3042320 | 3042422 | 100 | 515 | 1.20E-18 + |
| BPSL3408 | glucose-inhibited division protein A                 | 4045485 | 4047458 - | 657  | 53721015 | 3092627 gidA | COG0445D  | TCGCGCGTTCGACAAAGATTCGGG   | 1 | 103 | 1   | 103 | 100 Bm_ATCC23344_chr1 | 3510148 | 3036494 | 3036596 | 100 | 515 | 1.20E-18 + |
| BPSL3411 | putative branched-chain amino acid ABC transporter   | 4050167 | 4051222 - | 351  | 53721018 | 3094686 -    | COG0559E  | GTATGCCGCGCGGGCGGCTTTCG/   | 1 | 103 | 1   | 103 | 100 Bm_ATCC23344_chr1 | 3510148 | 3032730 | 3032832 | 100 | 515 | 1.20E-18 - |
| BPSL3412 | putative branched-chain amino acid ABC transporter   | 4051535 | 4052692 - | 385  | 53721019 | 3093378 -    | COG0683E  | GTCTGAACTGCGAAACCGCGCGG    | 1 | 103 | 1   | 103 | 100 Bm_ATCC23344_chr1 | 3510148 | 3031260 | 3031362 | 100 | 515 | 1.20E-18 + |
| BPSL3413 | hypothetical protein BPSL3413                        | 4053013 | 4054248 - | 411  | 53721020 | 3093379 -    | NULL      | GCGGGTGTACATATCGCTTTCGCTA  | 1 | 103 | 1   | 103 | 100 Bm_ATCC23344_chr1 | 3510148 | 3029704 | 3029806 | 100 | 515 | 1.20E-18 - |
| BPSL3415 | putative branched-chain amino acid ABC transporter   | 4055632 | 4056516 - | 294  | 53721022 | 3093118 -    | COG0559E  | GCGAATGACGCGCGGACGCGCGGAC  | 1 | 103 | 1   | 103 | 100 Bm_ATCC23344_chr1 | 3510148 | 3027436 | 3027538 | 100 | 515 | 1.20E-18 + |
| BPSL3416 | putative branched-chain amino acid ABC transporter   | 4056656 | 4057852 - | 398  | 53721023 | 3093118 -    | COG0683E  | CGCGCTTGTCCGCTTCCCGCGATGT  | 1 | 70  | 1   | 70  | 100 Bm_ATCC23344_chr1 | 3510148 | 3026133 | 3026202 | 100 | 350 | 3.30E-11 + |
| BPSL3418 | putative branched-chain amino acid ABC transporter   | 4058672 | 4059451 - | 259  | 53721025 | 3094089 -    | COG0411E  | AACGATACAAAGCTCGGGGACGAC   | 1 | 103 | 1   | 103 | 100 Bm_ATCC23344_chr1 | 3510148 | 3024501 | 3024603 | 100 | 515 | 1.20E-18 + |
| BPSL3419 | putative GMG oxidoreductase                          | 4059951 | 4061636 - | 561  | 53721026 | 3094090 -    | COG2303E  | GCGCGCGGCGATCTCGGATCGGC    | 1 | 103 | 1   | 103 | 100 Bm_ATCC23344_chr1 | 3510148 | 3022316 | 3022418 | 100 | 515 | 1.20E-18 - |
| BPSL3420 | methylmalonic acid semialdehyde dehydrogenase        | 4061811 | 4063337 - | 508  | 53721027 | 3091856 msdA | COG1012C  | CTCATTTGGATCGCGCATGGGGGCC/ | 1 | 103 | 1   | 103 | 100 Bm_ATCC23344_chr1 | 3510148 | 3020615 | 3020717 | 100 | 515 | 1.20E-18 + |
| BPSL3421 | putative LysR-family transcriptional regulator       | 4063478 | 4064377 + | 299  | 53721028 | 3094692 -    | COG0583K  | CGCGTATCGCGCGCTTCGGGAATG/  | 1 | 103 | 103 | 1   | 100 Bm_ATCC23344_chr1 | 3510148 | 3020572 | 3020674 | 100 | 515 | 1.20E-18 - |
| BPSL3422 | putative adenylate cyclase                           | 4064769 | 4065299 + | 176  | 53721029 | 3094693 -    | COG1437F  | CGCGGCTTTCGCGCTCGCGTCAAA/  | 1 | 103 | 103 | 1   | 100 Bm_ATCC23344_chr1 | 3510148 | 3019282 | 3019384 | 99  | 506 | 3.00E-18 - |
| BPSL3423 | putative AsnC-family transcriptional regulator       | 4065400 | 4065951 - | 183  | 53721030 | 3092624 -    | COG1522K  | GGGGTAGCCCTGCTCGCATCAGTGC  | 1 | 86  | 1   | 86  | 100 Bm_ATCC23344_chr1 | 3510148 | 3018019 | 3018104 | 100 | 430 | 8.00E-15 + |
| BPSL3424 | phenylalanine 4-hydroxylase                          | 4066035 | 4066928 - | 297  | 53721031 | 3091566 phhA | COG3186E  | TCGCCCAATTTTTCGCGCCAAACGCG | 1 | 86  | 86  | 1   | 100 Bm_ATCC23344_chr1 | 3510148 | 3018016 | 3018101 | 100 | 430 | 8.00E-15 - |
| BPSL3425 | pterin-4-alpha-carbinolamine dehydratase             | 4067012 | 4067317 + | 101  | 53721032 | 3092625 -    | NULL      | CGAACAAATATGAAAGATGCGGCG   | 1 | 86  | 86  | 1   | 100 Bm_ATCC23344_chr1 | 3510148 | 3017039 | 3017124 | 100 | 430 | 8.00E-15 - |
| BPSL3426 | putative two-component response regulator            | 4067752 | 4068444 - | 230  | 53721033 | 3093752 -    | COG0745TK | CGCTCTCGTGTCCGCGCGGCTTCC   | 1 | 103 | 103 | 1   | 100 Bm_ATCC23344_chr1 | 3510148 | 3016299 | 3016401 | 100 | 515 | 1.20E-18 - |
| BPSL3427 | putative two-component sensor kinase                 | 4068551 | 4070035 + | 494  | 53721034 | 3093753 -    | COG0642T  | GACGGTCTGACGCTTCGGTGGGG/   | 1 | 103 | 103 | 1   | 100 Bm_ATCC23344_chr1 | 3510148 | 3015500 | 3015602 | 99  | 506 | 3.00E-18 - |
| BPSL3428 | hypothetical protein BPSL3428                        | 4070477 | 4070989 - | 170  | 53721035 | 3091595 -    | COG2940R  | ATGATGGCGCGCTCGCGCGGCGGCG  | 1 | 103 | 1   | 103 | 100 Bm_ATCC23344_chr1 | 3510148 | 3012961 | 3013063 | 100 | 515 | 1.20E-18 - |
| BPSL3431 | putative MarR-family transcriptional regulator       | 4073388 | 4074029 - | 213  | 53721038 | 3091796 -    | COG1846K  | GACGCGCTCGTTCGGGTGGCCGCT/  | 1 | 103 | 1   | 103 | 100 Bm_ATCC23344_chr1 | 3510148 | 3010026 | 3010128 | 100 | 515 | 1.20E-18 + |
| BPSS0001 | hypothetical protein BPSS0001                        | 1       | 1188 +    | 395  | 53721040 | 3095690 -    | NULL      | CAACAGACAAACAAAAGCGTATC/   | 2 | 103 | 1   | 100 | 100 Bm_ATCC23344_chr2 | 2325379 | 1063    | 1162    | 97  | 473 | 6.10E-17 + |
| BPSS0002 | integrase                                            | 1282    | 2325 -    | 347  | 53721041 | 3095691 -    | NULL      | GCGCGTTCGCGCGCGCGGGTGTG    | 2 | 103 | 103 | 1   | 100 Bm_ATCC23344_chr2 | 2325379 | 3461    | 3563    | 100 | 515 | 7.70E-19 - |
| BPSS0004 | DNA-binding protein                                  | 2946    | 3554 -    | 202  | 53721043 | 3094949 -    | COG1396K  | GCTTGCTACTGTTATAGTGGCGGTG  | 2 | 103 | 103 | 1   | 100 Bm_ATCC23344_chr2 | 2325379 | 4692    | 4794    | 100 | 515 | 7.70E-19 - |
| BPSS0007 | hypothetical protein BPSS0007                        | 6300    | 6953 -    | 217  | 53721046 | 3094950 -    | NULL      | CGGTTTACGGTGAACGATCAATTC   | 2 | 92  | 92  | 1   | 100 Bm_ATCC23344_chr2 | 2325379 | 8091    | 8182    | 100 | 460 | 2.30E-16 - |
| BPSS0008 | TetR-family regulatory protein                       | 7043    | 7660 +    | 205  | 53721047 | 3097084 -    | COG1309K  | CGCTCTCCCTTTTTCGCAATGTG/   | 2 | 92  | 1   | 92  | 100 Bm_ATCC23344_chr2 | 2325379 | 8094    | 8185    | 100 | 460 | 2.30E-16 + |
| BPSS0009 | hypothetical protein BPSS0009                        | 7761    | 8240 +    | 159  | 53721048 | 3095092 -    | NULL      | AGCCCGCGCTTTTCATTCGACGAA   | 2 | 103 | 1   | 103 | 100 Bm_ATCC23344_chr2 | 2325379 | 8801    | 8903    | 100 | 515 | 7.70E-19 - |
| BPSS0010 | hypothetical protein BPSS0010                        | 8455    | 9471 -    | 338  | 53721049 | 3095093 -    | COG3608R  | CGCGGTGGAGGACATGTCGGCCCG   | 2 | 103 | 103 | 1   | 100 Bm_ATCC23344_chr2 | 2325379 | 10616   | 10718   | 99  | 506 | 2.00E-18 - |
| BPSS0011 | tartrate dehydrogenase                               | 9774    | 10859 -   | 361  | 53721050 | 3096144 -    | COG0473CE | TCGCGGATCGGGCAAGCTCCGCGG   | 2 | 103 | 103 | 1   | 100 Bm_ATCC23344_chr2 | 2325379 | 12004   | 12106   | 100 | 515 | 7.70E-19 - |
| BPSS0012 | LysR-family regulatory protein                       | 11028   | 11945 +   | 305  | 53721051 | 3096145 -    | COG0583K  | AAGCGATCGCGCGGAGCTTCGCGG   | 2 | 103 | 1   | 103 | 100 Bm_ATCC23344_chr2 | 2325379 | 12075   | 12177   | 100 | 515 | 7.70E-19 + |
| BPSS0013 | hypothetical protein BPSS0013                        | 12536   | 13213 +   | 225  | 53721052 | 3095048 -    | COG2020O  | AATTACCGCTGCTGACGCGGCTGC   | 2 | 103 | 1   | 103 | 100 Bm_ATCC23344_chr2 | 2325379 | 13478   | 13580   | 100 | 515 | 7.70E-19 + |
| BPSS0014 | glutathione S-transferase like protein               | 13448   | 14071 +   | 207  | 53721053 | 3096935 -    | COG0625O  | GGGCGAAGCGCATCGGTGATAGA/   | 2 | 103 | 1   | 103 | 100 Bm_ATCC23344_chr2 | 2325379 | 14370   | 14472   | 100 | 515 | 7.70E-19 - |
| BPSS0015 | hypothetical protein BPSS0015                        | 14506   | 14970 -   | 154  | 53721054 | 3096936 -    | NULL      | GTCTCGCCACGCGCGCGCGCGCG    | 2 | 82  | 82  | 1   | 100 Bm_ATCC23344_chr2 | 2325379 | 15990   | 16071   | 98  | 401 | 1.10E-13 - |
| BPSS0016 | phospholipase                                        | 15050   | 16222 -   | 390  | 53721055 | 3096001 -    | COG1752R  | AGCCGCGCGCGCGCACGAGAAAGC   | 2 | 65  | 65  | 1   | 100 Bm_ATCC23344_chr2 | 2325379 | 17242   | 17306   | 100 | 325 | 2.90E-10 - |
| BPSS0018 | acetoacetate decarboxylase                           | 17117   | 17857 -   | 246  | 53721057 | 3096265 adc  | NULL      | ATTTCGCAATAATCTTTTCAGTTGC  | 2 | 103 | 103 | 1   | 100 Bm_ATCC23344_chr2 | 2325379 | 18877   | 18979   | 100 | 515 | 7.70E-19 - |
| BPSS0019 | transport-related membrane protein                   | 18316   | 18912 +   | 198  | 53721058 | 3097142 -    | NULL      | CTCGGCGCGCTTCGGGTTAAGCCT   | 2 | 103 | 1   | 103 | 100 Bm_ATCC23344_chr2 | 2325379 | 19238   | 19340   | 100 | 515 | 7.70E-19 - |
| BPSS0020 | hypothetical protein BPSS0020                        | 18935   | 19228 -   | 97   | 53721059 | 3097005 -    | NULL      | CTATGTGCAAGCGACATGGCGGACG  | 2 | 103 | 103 | 1   | 100 Bm_ATCC23344_chr2 | 2325379 | 20248   | 20350   | 100 | 515 | 7.70E-19 - |
| BPSS0022 | PadR-like family regulatory protein                  | 20804   | 21508 -   | 234  | 53721061 | 3095972 -    | COG1695K  | GCCATCGCACTCGGCCCATTCGTT/  | 2 | 103 | 103 | 1   | 100 Bm_ATCC23344_chr2 | 2325379 | 22531   | 22632   | 99  | 500 | 3.70E-18 - |

|          |                                                         |        |          |      |          |              |                    |                            |   |     |     |     |                       |         |         |         |     |     |            |
|----------|---------------------------------------------------------|--------|----------|------|----------|--------------|--------------------|----------------------------|---|-----|-----|-----|-----------------------|---------|---------|---------|-----|-----|------------|
| BPSS0052 | hypothetical protein BPSS0052                           | 50835  | 51263 -  | 142  | 53721091 | 3097155 -    | COG42755           | GGCGGTGCCGGAGCGCTCGGCCG    | 2 | 103 | 103 | 1   | 100 Bm_ATCC23344_chr2 | 2325379 | 52242   | 52344   | 100 | 515 | 7.70E-19 - |
| BPSS0054 | chromate resistance exported protein                    | 52852  | 53847 -  | 331  | 53721093 | 3096597 chrB | COG42755           | CGCCACGACGAACAGCGGACGTTC   | 2 | 103 | 102 | 1   | 100 Bm_ATCC23344_chr2 | 2325379 | 54827   | 54928   | 95  | 465 | 1.40E-16 - |
| BPSS0056 | hypothetical protein BPSS0056                           | 55366  | 55668 +  | 100  | 53721095 | 3096093 -    | COG3794C           | CGCCGTGCGCCGCTCGCGCGATG    | 2 | 55  | 1   | 55  | 100 Bm_ATCC23344_chr2 | 2325379 | 56352   | 56406   | 100 | 275 | 5.30E-08 + |
| BPSS0058 | excinuclease ABC subunit A                              | 56852  | 62767 +  | 1971 | 53721097 | 3096641 uvrA | COG0178L           | CACCGGTGCCCGCATCGCGCGCG    | 2 | 103 | 1   | 103 | 100 Bm_ATCC23344_chr2 | 2325379 | 57787   | 57889   | 99  | 506 | 2.00E-18 + |
| BPSS0059 | hypothetical protein BPSS0059                           | 63800  | 64060 -  | 86   | 53721098 | 3095446 -    | COG3609K           | CATATCGCCGCGCACAGCCCTTCAJ  | 2 | 103 | 103 | 1   | 100 Bm_ATCC23344_chr2 | 2325379 | 65091   | 65193   | 100 | 515 | 7.70E-19 - |
| BPSS0061 | alpha-ketoglutarate permease                            | 66124  | 67476 +  | 450  | 53721101 | 3097120 kgtP | NULL               | AGAGGGCTTATGAAGGGCTCGACAC  | 2 | 103 | 1   | 103 | 100 Bm_ATCC23344_chr2 | 2325379 | 67040   | 67142   | 100 | 515 | 7.70E-19 + |
| BPSS0065 | hypothetical protein BPSS0065                           | 73093  | 75045 +  | 600  | 53721105 | 3096942 -    | NULL               | CACCGCGGCTTAACGACGAAGATTI  | 2 | 103 | 1   | 103 | 100 Bm_ATCC23344_chr2 | 2325379 | 73936   | 74038   | 100 | 515 | 7.70E-19 + |
| BPSS0066 | AraC family regulatory protein                          | 75296  | 75802 +  | 168  | 53721106 | 3096943 -    | NULL               | GGCTCGGCTTGGCGGCTTCCGGG    | 2 | 103 | 1   | 103 | 100 Bm_ATCC23344_chr2 | 2325379 | 76139   | 76241   | 100 | 515 | 7.70E-19 + |
| BPSS0067 | phospholipase C precursor                               | 76174  | 78369 +  | 731  | 53721107 | 3096819 -    | NULL               | GCTCGATGTGCAACGCGCCGCGAG   | 2 | 103 | 1   | 103 | 100 Bm_ATCC23344_chr2 | 2325379 | 77017   | 77119   | 99  | 506 | 2.00E-18 - |
| BPSS0145 | ATP-independent RNA helicase                            | 190115 | 191512 - | 465  | 53721181 | 3096710 dbpA | COG0513LKJ         | TGCGGCGCGCGCTCGCGCGGAGCG   | 2 | 103 | 3   | 103 | 98 Bm_ATCC23344_chr2  | 2325379 | 2133396 | 2133497 | 96  | 468 | 1.00E-16 + |
| BPSS0148 | subfamily M20D non-peptidase homologue                  | 193695 | 194885 - | 396  | 53721184 | 3096644 -    | COG1473R           | TGAGCACGACGACAATTATCAGCT   | 2 | 103 | 1   | 103 | 100 Bm_ATCC23344_chr2 | 2325379 | 2129994 | 2130096 | 100 | 515 | 7.70E-19 - |
| BPSS0151 | desaturase                                              | 197293 | 198459 + | 388  | 53721187 | 3096555 -    | COG3239I           | CGCCCCGAACGCGCGCTCGCCGG    | 2 | 103 | 103 | 1   | 100 Bm_ATCC23344_chr2 | 2325379 | 2127664 | 2127766 | 100 | 515 | 7.70E-19 - |
| BPSS0152 | hypothetical protein BPSS0152                           | 198951 | 199391 + | 146  | 53721188 | 3095697 -    | NULL               | TCTCTTACCAGCGCGCTGCCAAAG   | 2 | 103 | 103 | 1   | 100 Bm_ATCC23344_chr2 | 2325379 | 2125996 | 2126098 | 100 | 515 | 7.70E-19 - |
| BPSS0153 | glutamate/aspartate periplasmic binding protein pre     | 199973 | 200872 - | 299  | 53721189 | 3096477 gtlI | COG0834ET          | CCCCGCCCGGCGCGCGCGCATCG    | 2 | 103 | 1   | 103 | 100 Bm_ATCC23344_chr2 | 2325379 | 2123953 | 2124055 | 100 | 515 | 7.70E-19 + |
| BPSS0154 | D-amino acid dehydrogenase small subunit                | 201036 | 202283 - | 415  | 53721190 | 3096536 dadA | COG0665E           | CACITGCGCGGTCTTTCGCTGGG    | 2 | 103 | 1   | 103 | 100 Bm_ATCC23344_chr2 | 2325379 | 2122542 | 2122644 | 100 | 515 | 7.70E-19 + |
| BPSS0155 | LysR-family transcriptional regulator                   | 202436 | 203368 - | 130  | 53721191 | 3096598 -    | COG0583K           | CGCCGCGCTTCCAGCGCGCTTCGGG  | 2 | 103 | 1   | 103 | 100 Bm_ATCC23344_chr2 | 2325379 | 2121457 | 2121559 | 99  | 506 | 2.00E-18 + |
| BPSS0157 | hypothetical protein BPSS0157                           | 205043 | 205462 + | 319  | 53721193 | 3096943 -    | NULL               | ATGATCGCGTGTAGCTTCAATTTCI  | 2 | 103 | 103 | 1   | 100 Bm_ATCC23344_chr2 | 2325379 | 2119880 | 2119982 | 100 | 515 | 7.70E-19 - |
| BPSS0158 | hypothetical protein BPSS0158                           | 205904 | 207820 + | 638  | 53721194 | 3096327 -    | NULL               | GACCAATCAACGAGGCGGCGGACG   | 2 | 103 | 103 | 1   | 100 Bm_ATCC23344_chr2 | 2325379 | 2119019 | 2119121 | 99  | 506 | 2.00E-18 - |
| BPSS0159 | hypothetical protein BPSS0159                           | 208096 | 210993 + | 965  | 53721195 | 3095945 -    | COG3537G           | CGGTGTCTAGTCTTCCAGCGCAGT   | 2 | 103 | 103 | 1   | 100 Bm_ATCC23344_chr2 | 2325379 | 2116828 | 2116930 | 100 | 515 | 7.70E-19 - |
| BPSS0160 | siderophore biosynthesis-related protein                | 211595 | 212653 + | 352  | 53721196 | 3096465 -    | NULL               | TCTCGGAACGGTATTATTCATTAATT | 2 | 103 | 103 | 1   | 100 Bm_ATCC23344_chr2 | 2325379 | 2113329 | 2113431 | 100 | 515 | 7.70E-19 - |
| BPSS0165 | dioxygenase                                             | 218043 | 218969 + | 308  | 53721201 | 3096416 -    | COG3384S           | GGCCCCACCCTCGCCCGCTCATTC   | 2 | 57  | 57  | 1   | 100 Bm_ATCC23344_chr2 | 2325379 | 2106896 | 2106952 | 98  | 276 | 4.80E-08 - |
| BPSS0166 | LysR family regulatory protein                          | 219213 | 220175 - | 320  | 53721202 | 3096735 -    | COG0583K           | TATCCAGACCGGGCTCATGTCCGC   | 2 | 103 | 1   | 103 | 100 Bm_ATCC23344_chr2 | 2325379 | 2104667 | 2104769 | 99  | 506 | 2.00E-18 + |
| BPSS0168 | hypothetical protein BPSS0168                           | 225502 | 226767 - | 421  | 53721204 | 3096620 -    | COG1360N, COG3455S | CGGCGAGTGCGCCGACGGCGCGCG   | 2 | 91  | 1   | 91  | 100 Bm_ATCC23344_chr2 | 2325379 | 2098900 | 2098180 | 100 | 455 | 3.90E-16 + |
| BPSS0170 | lipoprotein                                             | 228224 | 228736 - | 170  | 53721206 | 3096592 -    | COG3521S           | CGCGCGCCCGCGCGCGCGCCGCC    | 2 | 100 | 1   | 100 | 100 Bm_ATCC23344_chr2 | 2325379 | 2096112 | 2096211 | 100 | 500 | 3.70E-18 + |
| BPSS0171 | hypothetical protein BPSS0171                           | 228834 | 229319 - | 161  | 53721207 | 3096593 -    | NULL               | CGTCCCCGGTTCGCGCGCTTCGCG   | 2 | 103 | 1   | 103 | 100 Bm_ATCC23344_chr2 | 2325379 | 2095526 | 2095628 | 99  | 506 | 2.00E-18 - |
| BPSS0175 | hypothetical protein BPSS0175                           | 235059 | 235778 + | 239  | 53721211 | 3096077 -    | NULL               | GAGATAAGGCGCGAGTGGCGCGAT   | 2 | 103 | 103 | 1   | 100 Bm_ATCC23344_chr2 | 2325379 | 2089900 | 2090002 | 100 | 515 | 7.70E-19 - |
| BPSS0181 | hypothetical protein BPSS0181                           | 241527 | 243854 + | 775  | 53721217 | 3096256 -    | COG3501S           | CGCGCGCGCGCGCGCGGATCGCG    | 2 | 74  | 74  | 1   | 100 Bm_ATCC23344_chr2 | 2325379 | 2083475 | 2083548 | 100 | 370 | 2.70E-12 - |
| BPSS0184 | hypothetical protein BPSS0184                           | 247624 | 248283 + | 219  | 53721220 | 3096904 -    | NULL               | TGCGTTGTGCGCGGTTCGCGATGT   | 2 | 103 | 103 | 1   | 100 Bm_ATCC23344_chr2 | 2325379 | 2077378 | 2077480 | 97  | 488 | 1.30E-17 - |
| BPSS0186 | hypothetical protein BPSS0186                           | 249406 | 251322 - | 638  | 53721222 | 3095747 -    | NULL               | CAATCACGCGCTTTTGAGCCAAT    | 2 | 103 | 1   | 103 | 100 Bm_ATCC23344_chr2 | 2325379 | 2073564 | 2073666 | 100 | 515 | 7.70E-19 + |
| BPSS0187 | LysR-family transcriptional regulator                   | 251662 | 252555 - | 297  | 53721223 | 3096255 -    | COG0583K           | ATCGGGAGAATCGATGGATTGACT   | 2 | 98  | 1   | 98  | 100 Bm_ATCC23344_chr2 | 2325379 | 2072336 | 2072433 | 100 | 490 | 1.00E-17 + |
| BPSS0188 | dehydrogenase                                           | 252651 | 253427 + | 258  | 53721224 | 3095845 -    | COG2249R           | TGCAATACCTGGAATATTGGAACTC  | 2 | 98  | 98  | 1   | 100 Bm_ATCC23344_chr2 | 2325379 | 2072337 | 2072430 | 100 | 490 | 1.00E-17 - |
| BPSS0190 | O-acetylhomoserine                                      | 254427 | 255722 - | 431  | 53721225 | 3096143 -    | COG2873E           | TACCAAAACAGCTAAAAGCGCGCG   | 2 | 103 | 1   | 103 | 100 Bm_ATCC23344_chr2 | 2325379 | 2069164 | 2069266 | 100 | 515 | 7.70E-19 - |
| BPSS0193 | hypothetical protein BPSS0193                           | 258412 | 259767 - | 451  | 53721228 | 3096290 -    | COG1457F           | GACGTTGTGAGCGCGCCCGCTCGI   | 2 | 103 | 1   | 103 | 100 Bm_ATCC23344_chr2 | 2325379 | 2065260 | 2065362 | 99  | 506 | 2.00E-18 + |
| BPSS0198 | hypothetical protein BPSS0198                           | 263527 | 264327 - | 266  | 53721233 | 3096371 -    | COG1540R           | ATAGAACTATTTTGGGACGCGCGCC  | 2 | 103 | 1   | 103 | 100 Bm_ATCC23344_chr2 | 2325379 | 2060700 | 2060802 | 98  | 497 | 5.00E-18 - |
| BPSS0199 | LysR-family transcriptional regulator                   | 264595 | 265509 + | 304  | 53721234 | 3096372 -    | COG0583K           | GACCGGCGCGGAGCGCGGCGGTGT   | 2 | 103 | 103 | 1   | 100 Bm_ATCC23344_chr2 | 2325379 | 2060530 | 2060632 | 98  | 497 | 5.00E-18 - |
| BPSS0201 | prolyl iminopeptidase                                   | 269128 | 270066 + | 312  | 53721236 | 3095394 pip  | COG0596R           | CATCGCATGGGGGCGACGCAATGCC  | 2 | 103 | 103 | 1   | 100 Bm_ATCC23344_chr2 | 2325379 | 2055910 | 2056012 | 100 | 515 | 7.70E-19 - |
| BPSS0202 | hypothetical protein BPSS0202                           | 270241 | 271134 + | 297  | 53721237 | 3096621 -    | COG0500QR          | CGTCTGTTCGGGTGCGCGAAGCGG   | 2 | 103 | 103 | 1   | 100 Bm_ATCC23344_chr2 | 2325379 | 2054811 | 2054913 | 100 | 515 | 7.70E-19 - |
| BPSS0204 | methyl-accepting chemotaxis protein I                   | 274149 | 275777 - | 542  | 53721239 | 3095098 tsr  | COG0840NT          | CGCGGCCATTCTGCTGTTTAAAGG   | 2 | 103 | 1   | 103 | 100 Bm_ATCC23344_chr2 | 2325379 | 2049107 | 2049209 | 100 | 515 | 7.70E-19 + |
| BPSS0205 | sigma interaction-related Fis-family transcriptional re | 276127 | 278211 - | 694  | 53721240 | 3095843 prpR | COG3829K           | ATATTGAAATTAATAATCCATATTC  | 2 | 103 | 1   | 103 | 100 Bm_ATCC23344_chr2 | 2325379 | 2046673 | 2046675 | 98  | 497 | 5.00E-18 - |
| BPSS0206 | probable methylsulfoxide lyase                          | 278428 | 279321 - | 297  | 53721241 | 3095582 prpB | COG2513G           | TGCGGCCGAATCGGGAAGCGCGCG   | 2 | 103 | 103 | 1   | 100 Bm_ATCC23344_chr2 | 2325379 | 2046554 | 2046656 | 99  | 506 | 2.00E-18 - |
| BPSS0208 | aconitate hydratase                                     | 280616 | 283210 + | 864  | 53721243 | 3095728 acnA | COG1048C           | TGCGCGGACCCGCGCGCGCGGCC    | 2 | 76  | 76  | 1   | 100 Bm_ATCC23344_chr2 | 2325379 | 2044366 | 2044441 | 100 | 380 | 9.60E-13 - |
| BPSS0209 | hypothetical protein BPSS0209                           | 283368 | 284558 + | 396  | 53721244 | 3096880 -    | NULL               | CGTTGCGCGCGGAGCGGCAACGGC   | 2 | 103 | 103 | 1   | 100 Bm_ATCC23344_chr2 | 2325379 | 2041613 | 2041716 | 99  | 505 | 2.20E-18 - |
| BPSS0212 | hypothetical protein BPSS0212                           | 286414 | 287052 + | 212  | 53721247 | 3096247 -    | NULL               | CGCGGAATTCGCGCGCTTCGGCGAG  | 2 | 95  | 95  | 1   | 100 Bm_ATCC23344_chr2 | 2325379 | 2037969 | 2038063 | 98  | 466 | 1.30E-16 - |
| BPSS0213 | hypothetical protein BPSS0213                           | 287105 | 287695 + | 196  | 53721248 | 3096906 -    | NULL               | GGCGGCGCGCGCTTGCATCGCATCI  | 2 | 55  | 55  | 1   | 100 Bm_ATCC23344_chr2 | 2325379 | 2037278 | 2037332 | 98  | 266 | 1.40E-07 - |
| BPSS0214 | heme/metallo cofactor biosynthesis related protein      | 287774 | 289249 + | 491  | 53721249 | 3096907 -    | COG0535R           | GGCCGCGCGCGCGGCTTGCCGCAIC  | 2 | 81  | 81  | 1   | 100 Bm_ATCC23344_chr2 | 2325379 | 2036609 | 2036689 | 98  | 396 | 1.80E-13 - |
| BPSS0215 | methyl-accepting chemotaxis protein                     | 289471 | 291084 + | 537  | 53721250 | 3096604 tar  | COG0840NT          | GGCCGCGAGCGCCCTACGCCGCGT   | 2 | 103 | 103 | 1   | 100 Bm_ATCC23344_chr2 | 2325379 | 2034962 | 2035064 | 100 | 515 | 7.70E-19 - |
| BPSS0216 | hypothetical protein BPSS0216                           | 291447 | 293084 - | 545  | 53721251 | 3096037 -    | NULL               | ATTGCTTTTTTCATGCAATAAAGATG | 2 | 103 | 1   | 103 | 100 Bm_ATCC23344_chr2 | 2325379 | 2031426 | 2031528 | 100 | 515 | 7.70E-19 + |
| BPSS0217 | LysR-family transcriptional regulator                   | 293213 | 294070 + | 285  | 53721252 | 3096243 -    | COG0583K           | CGGATGTTTAGGCTGAGCGGCTGT   | 2 | 103 | 103 | 1   | 100 Bm_ATCC23344_chr2 | 2325379 | 2031395 | 2031497 | 100 | 515 | 7.70E-19 - |
| BPSS0218 | isomerase                                               | 294153 | 295256 - | 367  | 53721253 | 3096244 -    | COG2942G           | CCATGTTTCGACGGCGGCGAGCCCG  | 2 | 103 | 1   | 103 | 100 Bm_ATCC23344_chr2 | 2325379 | 2029244 | 2029347 | 97  | 487 | 1.40E-17 + |
| BPSS0219 | MgtC family membrane protein                            | 295367 | 296062 + | 231  | 53721254 | 3096908 -    | COG1285S           | GGCGCGGTTGACGGGGGAAGAACC   | 2 | 103 | 103 | 1   | 100 Bm_ATCC23344_chr2 | 2325379 | 2029231 | 2029334 | 97  | 487 | 1.40E-17 - |
| BPSS0223 | hypothetical protein BPSS0223                           | 299703 | 300371 + | 222  | 53721258 | 3096389 -    | NULL               | GCGGGCGACAATTTCGACACCGGC   | 2 | 103 | 1   | 103 | 100 Bm_ATCC23344_chr2 | 2325379 | 2024395 | 2024497 | 100 | 515 | 7.70E-19 + |
| BPSS0226 | lipoprotein                                             | 305951 | 307372 + | 473  | 53721261 | 3096089 -    | COG5361S           | ACACGCGCGCGGACGACGACTAC    | 2 | 103 | 103 | 1   | 100 Bm_ATCC23344_chr2 | 2325379 | 2018657 | 2018759 | 100 | 515 | 7.70E-19 - |
| BPSS0229 | hypothetical protein BPSS0229                           | 312200 | 313861 + | 553  | 53721264 | 3096456 -    | COG3119P           | GACAGACAAACGAAAGCGGCGGCI   | 2 | 103 | 1   | 103 | 100 Bm_ATCC23344_chr2 | 2325379 | 2010684 | 2010786 | 100 | 515 | 7.70E-19 + |
| BPSS0230 | Glyoxalase/Ileomycin resistance protein/Dioxygenase     | 314442 | 314834 - | 130  | 53721265 | 3096457 -    | COG0346E           | CACGGCGACGTTGCGCAGGGGCGC   | 2 | 103 | 1   | 103 | 100 Bm_ATCC23344_chr2 | 2325379 | 2009711 | 2009813 | 100 | 515 | 7.70E-19 + |
| BPSS0231 | hypothetical protein BPSS0231                           | 314959 | 315243 - | 94   | 53721266 | 3095687 -    | NULL               | GCAGGGTGCAGCGGGCGCGCGCG    | 2 | 103 | 1   |     |                       |         |         |         |     |     |            |

|          |                                               |        |          |      |          |               |                     |                             |   |     |     |     |                       |         |         |         |     |     |            |
|----------|-----------------------------------------------|--------|----------|------|----------|---------------|---------------------|-----------------------------|---|-----|-----|-----|-----------------------|---------|---------|---------|-----|-----|------------|
| BPSS0268 | O-antigen acetylase                           | 355722 | 357836 + | 704  | 53721302 | 3096045 -     | COG1835I            | TTTTTAATCGATACTACTTGTCGCCG  | 2 | 103 | 103 | 1   | 100 Bm_ATCC23344_chr2 | 2325379 | 1632626 | 1632728 | 100 | 515 | 7.70E-19 - |
| BPSS0285 | hypothetical protein BPSS0285                 | 381038 | 381946 - | 302  | 53721320 | 3096046 -     | COG3741E            | AAGCACTTGACCGGGCAATTTGGGG   | 2 | 103 | 1   | 103 | 100 Bm_ATCC23344_chr2 | 2325379 | 1606053 | 1606155 | 100 | 515 | 7.70E-19 + |
| BPSS0318 | hypothetical protein BPSS0318                 | 445815 | 446642 - | 275  | 53721353 | 3096051 -     | NULL                | TCGGCGCGAAACACCGCGCGCTG     | 2 | 103 | 1   | 103 | 100 Bm_ATCC23344_chr2 | 2325379 | 1541743 | 1541845 | 100 | 515 | 7.70E-19 + |
| BPSS0324 | glycolate permease                            | 452083 | 453801 + | 572  | 53721359 | 3095424 glcA  | COG1620C            | CGCCGACCACACAACAAAGCGCCG    | 2 | 103 | 103 | 1   | 100 Bm_ATCC23344_chr2 | 2325379 | 1536463 | 1536565 | 100 | 515 | 7.70E-19 - |
| BPSS0325 | hypothetical protein BPSS0325                 | 454103 | 454540 + | 145  | 53721360 | 3096205 -     | COG2259S            | CTTTTGTCTTGGAAACGAGCGACGAGA | 2 | 103 | 103 | 1   | 100 Bm_ATCC23344_chr2 | 2325379 | 1534416 | 1534518 | 100 | 515 | 7.70E-19 - |
| BPSS0327 | sugar transport-related, membrane protein     | 456588 | 457880 - | 430  | 53721362 | 3096012 -     | NULL                | CCACCCGCGCGGTTCGACCGTCTGT   | 2 | 103 | 1   | 103 | 100 Bm_ATCC23344_chr2 | 2325379 | 1530590 | 1530692 | 100 | 515 | 7.70E-19 + |
| BPSS0329 | fatty aldehyde dehydrogenase                  | 459223 | 460815 - | 530  | 53721364 | 3095117 -     | COG1012C            | CGCGCGCGCGCGCGCATCCGCTT     | 2 | 78  | 1   | 78  | 100 Bm_ATCC23344_chr2 | 2325379 | 1527654 | 1527731 | 100 | 390 | 3.40E-13 + |
| BPSS0331 | dihydrodipicolinate synthase                  | 462961 | 463881 - | 306  | 53721366 | 3096903 -     | COG0329EM           | CGGTTGGAAAGGCTCAAGCGCTCG    | 2 | 103 | 1   | 103 | 100 Bm_ATCC23344_chr2 | 2325379 | 1524613 | 1524715 | 100 | 515 | 7.70E-19 + |
| BPSS0332 | hypothetical protein BPSS0332                 | 464132 | 465064 + | 310  | 53721367 | 3097013 -     | COG3938E            | GGGCTGTCCGATTCGTGCGCGCG     | 2 | 103 | 103 | 1   | 100 Bm_ATCC23344_chr2 | 2325379 | 1524460 | 1524562 | 100 | 515 | 7.70E-19 - |
| BPSS0336 | AraC-family transcriptional regulator         | 467905 | 468621 + | 238  | 53721371 | 3095560 -     | NULL                | CACGGCCGCGCGCGCGCGCGCG      | 2 | 103 | 103 | 1   | 100 Bm_ATCC23344_chr2 | 2325379 | 1520678 | 1520780 | 99  | 506 | 2.00E-18 - |
| BPSS0337 | hypothetical protein BPSS0337                 | 468818 | 469087 - | 89   | 53721372 | 3095561 -     | NULL                | ATGCCGTAAACCTTTGCGCGGCGCC   | 2 | 103 | 1   | 103 | 100 Bm_ATCC23344_chr2 | 2325379 | 1519397 | 1519499 | 100 | 515 | 7.70E-19 - |
| BPSS0339 | amino acid dioxygenase                        | 470668 | 472722 - | 684  | 53721374 | 3096498 -     | COG1082G, COG3185ER | CTCCAGCTTCGACGGCAGCGCGG     | 2 | 103 | 103 | 1   | 100 Bm_ATCC23344_chr2 | 2325379 | 873971  | 874073  | 100 | 515 | 7.70E-19 + |
| BPSS0340 | 3-dehydroquinase dehydratase                  | 472982 | 473437 + | 151  | 53721375 | 3097223 aroQ2 | COG0757E            | AAGACATTGCGCGAGCGCAAGCGC    | 2 | 103 | 1   | 103 | 100 Bm_ATCC23344_chr2 | 2325379 | 874133  | 874235  | 100 | 515 | 7.70E-19 + |
| BPSS0345 | ABC transport system, ATP-binding protein     | 478571 | 479668 + | 365  | 53721380 | 3096022 -     | COG3842E            | CGCGCGCGCGCGCGCGCGCAAGC     | 2 | 59  | 1   | 59  | 100 Bm_ATCC23344_chr2 | 2325379 | 879617  | 879675  | 100 | 295 | 6.70E-09 + |
| BPSS0352 | hypothetical protein BPSS0352                 | 492322 | 493167 - | 281  | 53721387 | 3096091 -     | COG2961R            | GCCGCGTCCGTGCGCCATGTCCAC    | 2 | 103 | 103 | 1   | 100 Bm_ATCC23344_chr2 | 2325379 | 896389  | 896491  | 100 | 515 | 7.70E-19 - |
| BPSS0353 | potassium channel subunit                     | 493316 | 494287 - | 323  | 53721388 | 3095964 -     | COG0667C            | TATCGCGCGCGCGCGCACCGCTG     | 2 | 103 | 103 | 1   | 100 Bm_ATCC23344_chr2 | 2325379 | 897509  | 897611  | 100 | 515 | 7.70E-19 - |
| BPSS0354 | 3-hydroxybutyrate dehydrogenase               | 494475 | 495263 + | 262  | 53721389 | 3095965 -     | COG10281QR          | CGCGCGCGCGGATAGCGCGCATTC    | 2 | 103 | 1   | 103 | 100 Bm_ATCC23344_chr2 | 2325379 | 897599  | 897701  | 100 | 515 | 7.70E-19 + |
| BPSS0355 | aspartate aminotransferase                    | 495489 | 496688 - | 399  | 53721390 | 3095099 tyrB  | COG1448E            | TCTCGCGGGATGTCCGCGGCTCG     | 2 | 103 | 103 | 1   | 100 Bm_ATCC23344_chr2 | 2325379 | 901496  | 901598  | 100 | 515 | 7.70E-19 - |
| BPSS0356 | LysR-family transcriptional regulator         | 496976 | 499066 + | 696  | 53721391 | 3096546 uvrB  | COG0556L            | TCTGCTCAGCAATCCGAGCGCGG     | 2 | 103 | 1   | 103 | 100 Bm_ATCC23344_chr2 | 2325379 | 901686  | 901788  | 100 | 515 | 7.70E-19 + |
| BPSS0357 | hypothetical protein BPSS0357                 | 499290 | 499841 + | 183  | 53721392 | 3096107 -     | COG3470P            | ATAGTTTCGATTAACGTTCTTCATCC  | 2 | 103 | 1   | 103 | 100 Bm_ATCC23344_chr2 | 2325379 | 904000  | 904102  | 100 | 515 | 7.70E-19 - |
| BPSS0359 | hypothetical protein BPSS0359                 | 500290 | 501132 + | 280  | 53721394 | 3095950 -     | COG0672P            | CGGTTTTCCGTTTGACGCGCGGCA    | 2 | 62  | 1   | 62  | 100 Bm_ATCC23344_chr2 | 2325379 | 905041  | 905102  | 100 | 310 | 1.40E-09 + |
| BPSS0361 | hypothetical protein BPSS0361                 | 502589 | 502999 + | 136  | 53721396 | 3096720 -     | COG3193R            | CGCGCTTCGGGCGGTATGATGATC    | 2 | 62  | 1   | 62  | 100 Bm_ATCC23344_chr2 | 2325379 | 907340  | 907401  | 100 | 310 | 1.40E-09 + |
| BPSS0362 | hypothetical protein BPSS0362                 | 503302 | 503565 - | 87   | 53721397 | 3096721 -     | COG4256P            | CTATCGACATTCGGTTTTCGATGGA   | 2 | 103 | 1   | 103 | 100 Bm_ATCC23344_chr2 | 2325379 | 1642554 | 1642656 | 99  | 506 | 2.00E-18 + |
| BPSS0363 | hypothetical protein BPSS0363                 | 503709 | 504194 - | 161  | 53721398 | 3095788 -     | NULL                | GCCGAACGCGCGAAGGCGGAAGCTC   | 2 | 103 | 1   | 103 | 100 Bm_ATCC23344_chr2 | 2325379 | 1641925 | 1642027 | 100 | 515 | 7.70E-19 + |
| BPSS0364 | chromosome condensation protein               | 504313 | 505185 - | 290  | 53721399 | 3095894 -     | COG1741R            | GATCCATTGCGAATCGAGCGGATTT   | 2 | 103 | 1   | 103 | 100 Bm_ATCC23344_chr2 | 2325379 | 1640934 | 1641036 | 100 | 515 | 7.70E-19 - |
| BPSS0365 | LysR-family transcriptional regulator         | 505308 | 506279 + | 323  | 53721400 | 3095895 -     | COG0583K            | AAATAGCGTTATTTTTGCAACGCA    | 2 | 103 | 103 | 1   | 100 Bm_ATCC23344_chr2 | 2325379 | 1640909 | 1641011 | 100 | 515 | 7.70E-19 - |
| BPSS0368 | TonB-like transport protein                   | 507869 | 508564 - | 231  | 53721403 | 3096504 -     | COG0810M            | CAGCACTTCGCGCGCGCTCCGGC     | 2 | 103 | 1   | 103 | 100 Bm_ATCC23344_chr2 | 2325379 | 1969628 | 1969730 | 100 | 515 | 7.70E-19 - |
| BPSS0369 | bacterioferritin ferredoxin protein           | 508840 | 509079 - | 79   | 53721404 | 3095842 -     | COG2906P            | AAGCATCTGGTTTGTGTACAAAGA    | 2 | 103 | 1   | 103 | 100 Bm_ATCC23344_chr2 | 2325379 | 1969113 | 1969215 | 100 | 515 | 7.70E-19 + |
| BPSS0371 | bacterioferritin                              | 510130 | 510606 - | 158  | 53721406 | 3097235 bfr   | COG2193P            | CGTTCATCTTTCGGATATCGAACG    | 2 | 103 | 1   | 103 | 100 Bm_ATCC23344_chr2 | 2325379 | 1967586 | 1967688 | 100 | 515 | 7.70E-19 + |
| BPSS0373 | hypothetical protein BPSS0373                 | 512336 | 512944 - | 220  | 53721408 | 3094938 -     | COG2862S            | CGCGATGCCGCGCGCTCGCAAGCC    | 2 | 103 | 1   | 103 | 100 Bm_ATCC23344_chr2 | 2325379 | 1965248 | 1965350 | 99  | 506 | 2.00E-18 + |
| BPSS0374 | hypothetical protein BPSS0374                 | 513177 | 514076 - | 299  | 53721409 | 3095533 -     | COG0697GER          | GAACTTACCCTGTGCTATGACGATC   | 2 | 103 | 1   | 103 | 100 Bm_ATCC23344_chr2 | 2325379 | 1964120 | 1964222 | 99  | 506 | 2.00E-18 + |
| BPSS0375 | acetyl-coenzyme A synthetase                  | 514366 | 516348 + | 660  | 53721410 | 3095977 acoE  | COG0365I            | GCGCGCAGGGTGGGAGACAGCGCG    | 2 | 103 | 103 | 1   | 100 Bm_ATCC23344_chr2 | 2325379 | 1963928 | 1964030 | 100 | 515 | 7.70E-19 - |
| BPSS0492 | alkyl hydroperoxide reductase protein         | 669449 | 670012 - | 187  | 53721528 | 3096133 ahpC  | COG0450O            | AATACCGATTCCGATCATTTGAAAC   | 2 | 103 | 1   | 103 | 100 Bm_ATCC23344_chr2 | 2325379 | 1955780 | 1955882 | 99  | 506 | 2.00E-18 + |
| BPSS0493 | chitin-binding protein                        | 670272 | 671369 - | 365  | 53721529 | 3096851 -     | COG3397S            | CGCATCACATTTCGATATCAAACAC   | 2 | 103 | 1   | 103 | 100 Bm_ATCC23344_chr2 | 2325379 | 1954423 | 1954525 | 99  | 506 | 2.00E-18 + |
| BPSS0494 | hypothetical protein BPSS0494                 | 671929 | 672432 - | 167  | 53721530 | 3096852 -     | NULL                | CGGCGCGCGCGCGCGACACGACG     | 2 | 77  | 1   | 77  | 100 Bm_ATCC23344_chr2 | 2325379 | 1953388 | 1953464 | 100 | 385 | 5.70E-13 + |
| BPSS0495 | nitroreductase family protein                 | 672507 | 673130 - | 207  | 53721531 | 3095734 -     | COG0778C            | GTATCGAATCAGCAGCATTGATAAA   | 2 | 103 | 1   | 103 | 100 Bm_ATCC23344_chr2 | 2325379 | 1952664 | 1952766 | 100 | 515 | 7.70E-19 - |
| BPSS0496 | hypothetical protein BPSS0496                 | 673843 | 675279 - | 478  | 53721532 | 3096563 -     | COG2308S            | CCAAAGTCCCAATCAGACGGGAAG    | 2 | 103 | 103 | 1   | 100 Bm_ATCC23344_chr2 | 2325379 | 1952049 | 1952151 | 100 | 515 | 7.70E-19 - |
| BPSS0497 | hypothetical protein BPSS0497                 | 675374 | 676315 + | 313  | 53721533 | 3096564 -     | COG2307S            | GCGCACGCGCACGCGCGCGCTCGC    | 2 | 97  | 97  | 1   | 100 Bm_ATCC23344_chr2 | 2325379 | 1950518 | 1950614 | 98  | 476 | 4.40E-17 - |
| BPSS0499 | transglutaminase-like superfamily protein     | 677417 | 680839 + | 1140 | 53721535 | 3096215 -     | COG1305E, COG4196S  | TGCGGCGCGGATCGCGCGCGCGCG    | 2 | 103 | 103 | 1   | 100 Bm_ATCC23344_chr2 | 2325379 | 1948475 | 1948577 | 100 | 515 | 7.70E-19 - |
| BPSS0500 | hypothetical protein BPSS0500                 | 681027 | 683675 + | 882  | 53721536 | 3096216 -     | COG2307S, COG2308S  | ACGTGCGGCTTGCGCGCGCGCGCA    | 2 | 103 | 103 | 1   | 100 Bm_ATCC23344_chr2 | 2325379 | 1944865 | 1944967 | 100 | 515 | 7.70E-19 - |
| BPSS0502 | GntR family regulatory protein                | 684891 | 686393 - | 500  | 53721538 | 3095927 -     | COG1167KE           | GCGAGGTTCTCGCGCGCTGGATCG    | 2 | 103 | 1   | 103 | 100 Bm_ATCC23344_chr2 | 2325379 | 1939416 | 1939518 | 98  | 497 | 5.00E-18 + |
| BPSS0503 | transporter protein                           | 686521 | 687708 - | 395  | 53721539 | 3096742 -     | NULL                | GGTCTTCTGGCTTATACACATTGCG   | 2 | 103 | 103 | 1   | 100 Bm_ATCC23344_chr2 | 2325379 | 1939386 | 1939488 | 99  | 506 | 2.00E-18 - |
| BPSS0504 | hypothetical protein BPSS0504                 | 688046 | 689119 - | 357  | 53721540 | 3095305 -     | COG1289S            | CGCATGGACAGCGCATATGCTTAC    | 2 | 103 | 1   | 103 | 100 Bm_ATCC23344_chr2 | 2325379 | 1936714 | 1936816 | 100 | 515 | 7.70E-19 - |
| BPSS0505 | AraC-family regulatory protein                | 689358 | 690323 - | 321  | 53721541 | 3095306 -     | COG4977K            | CGAGGCGACGGTGGCGCATCGCCCC   | 2 | 103 | 1   | 103 | 100 Bm_ATCC23344_chr2 | 2325379 | 1935510 | 1935612 | 98  | 497 | 5.00E-18 + |
| BPSS0506 | DJ-1/PfpI family protein                      | 690465 | 691163 + | 232  | 53721542 | 3096430 -     | NULL                | CGCCAATCGTCCGCGGCTACGCTC    | 2 | 103 | 103 | 1   | 100 Bm_ATCC23344_chr2 | 2325379 | 1935466 | 1935568 | 96  | 479 | 3.30E-17 - |
| BPSS0513 | CDP-alcohol phosphatidyltransferase           | 697828 | 698517 - | 229  | 53721549 | 3096807 -     | COG0558I            | CAGCCGACGCCAAACCTTACACTTT   | 2 | 103 | 2   | 103 | 99 Bm_ATCC23344_chr2  | 2325379 | 1927328 | 1927429 | 100 | 510 | 1.30E-18 + |
| BPSS0514 | acetyl-CoA hydrolase/transferase              | 698792 | 700396 + | 534  | 53721550 | 3096808 -     | COG0427C            | ATATCCAGCAAACTCCGGAAGTTAC   | 2 | 103 | 103 | 1   | 100 Bm_ATCC23344_chr2 | 2325379 | 1927150 | 1927252 | 100 | 515 | 7.70E-19 - |
| BPSS0515 | hypothetical protein BPSS0515                 | 702116 | 703054 + | 312  | 53721551 | 3095506 -     | COG3515S            | CTAATACATTGGAAGAAATAAGTTT   | 2 | 103 | 103 | 1   | 100 Bm_ATCC23344_chr2 | 2325379 | 1923837 | 1923939 | 100 | 515 | 7.70E-19 - |
| BPSS0518 | hypothetical protein BPSS0518                 | 705288 | 705815 + | 175  | 53721554 | 3096785 -     | NULL                | GTGTTTCGAGGCGCTCGGGATGGA    | 2 | 103 | 1   | 103 | 100 Bm_ATCC23344_chr2 | 2325379 | 436115  | 436217  | 99  | 506 | 2.00E-18 + |
| BPSS0524 | hypothetical protein BPSS0524                 | 714509 | 716797 + | 762  | 53721560 | 3095481 -     | COG3501S            | ACAGTAGCTCGCGCGCGCTGAAAC    | 2 | 103 | 1   | 103 | 100 Bm_ATCC23344_chr2 | 2325379 | 445291  | 445393  | 98  | 497 | 5.00E-18 + |
| BPSS0531 | hypothetical protein BPSS0531                 | 723278 | 724936 + | 552  | 53721567 | 3095834 -     | COG1360N, COG3455S  | CCCACGACATGAGACGCAATCTGCI   | 2 | 85  | 1   | 85  | 100 Bm_ATCC23344_chr2 | 2325379 | 454078  | 454162  | 100 | 425 | 8.90E-15 + |
| BPSS0533 | hypothetical protein BPSS0533                 | 728495 | 728854 + | 119  | 53721569 | 3096749 -     | NULL                | TGCGTCGAGCATCGGTATTCATGCG   | 2 | 61  | 1   | 61  | 100 Bm_ATCC23344_chr2 | 2325379 | 459319  | 459379  | 100 | 305 | 2.40E-09 + |
| BPSS0535 | hypothetical protein BPSS0535                 | 729527 | 729898 + | 123  | 53721571 | 3095636 -     | NULL                | GCATAAAACTATTGTATAAACACCG   | 2 | 103 | 1   | 103 | 100 Bm_ATCC23344_chr2 | 2325379 | 460309  | 460411  | 100 | 515 | 7.70E-19 + |
| BPSS0536 | 3-hydroxydecanoyl-ACP-CoA transacylase        | 730449 | 731348 + | 299  | 53721572 | 3096849 -     | COG0596R            | CAGGGCGGGCAGATCGCGCGGGAG    | 2 | 103 | 1   | 103 | 100 Bm_ATCC23344_chr2 | 2325379 | 461231  | 461333  | 100 | 515 | 7.70E-19 + |
| BPSS0537 | UDP-glucuronosyl and UDP-glucosyl transferase | 731570 | 732889 + | 439  | 5372157  |               |                     |                             |   |     |     |     |                       |         |         |         |     |     |            |

|          |                                                   |        |          |     |          |              |                     |                            |   |     |     |     |                       |         |         |         |     |     |            |
|----------|---------------------------------------------------|--------|----------|-----|----------|--------------|---------------------|----------------------------|---|-----|-----|-----|-----------------------|---------|---------|---------|-----|-----|------------|
| BPSS0565 | AraC family regulatory protein                    | 771719 | 772663 - | 314 | 53721601 | 3095853 -    | COG4977K            | GTCTTGGCGGGCTTCGGCCGCGAI   | 2 | 103 | 103 | 1   | 100 Bm_ATCC23344_chr2 | 2325379 | 503444  | 503546  | 100 | 515 | 7.70E-19 - |
| BPSS0566 | lipoprotein                                       | 772931 | 773881 + | 316 | 53721602 | 3095242 -    | COG2113E            | CGCCTCGCCGGGAATCGGCCCGT    | 2 | 103 | 1   | 103 | 100 Bm_ATCC23344_chr2 | 2325379 | 503614  | 503716  | 100 | 515 | 7.70E-19 + |
| BPSS0567 | hypothetical protein BPSS0567                     | 773964 | 774893 + | 309 | 53721603 | 3095243 -    | COG3246S            | ACGGTGGGTTTCGCGAGCGCGCG    | 2 | 85  | 1   | 85  | 100 Bm_ATCC23344_chr2 | 2325379 | 504665  | 504749  | 98  | 416 | 2.30E-14 + |
| BPSS0568 | 3-hydroxybutyryl-CoA dehydrogenase                | 775008 | 775973 + | 321 | 53721604 | 3095253 -    | COG1250I            | GCATCGACGCCCGCGCAACGTGGC   | 2 | 103 | 1   | 103 | 100 Bm_ATCC23344_chr2 | 2325379 | 505691  | 505793  | 100 | 515 | 7.70E-19 + |
| BPSS0571 | hypothetical protein BPSS0571                     | 777815 | 778123 - | 120 | 53721607 | 3095861 -    | NULL                | AACCGAGCGTTTACCCTAGGACCC   | 2 | 103 | 103 | 1   | 100 Bm_ATCC23344_chr2 | 2325379 | 508904  | 509006  | 100 | 515 | 7.70E-19 - |
| BPSS0630 | response regulator protein                        | 858794 | 859504 + | 236 | 53721666 | 3094956 -    | COG0745TK           | AATGTTTCAGGATCTTACAAAGTTG  | 2 | 103 | 1   | 103 | 100 Bm_ATCC23344_chr2 | 2325379 | 841882  | 841984  | 100 | 515 | 7.70E-19 + |
| BPSS0631 | sensor protein                                    | 859892 | 861007 + | 371 | 53721667 | 3095623 -    | COG0642T            | CGCCGCGCTGATCGCGATGCCCGC   | 2 | 103 | 1   | 103 | 100 Bm_ATCC23344_chr2 | 2325379 | 842980  | 843082  | 99  | 506 | 2.00E-18 + |
| BPSS0633 | rod shape-determining protein                     | 864490 | 865554 + | 354 | 53721669 | 3095136 mreB | COG1077D            | AGCGACTGAGTGGATTGTGCTGCTC  | 2 | 103 | 1   | 103 | 100 Bm_ATCC23344_chr2 | 2325379 | 847630  | 847632  | 100 | 515 | 7.70E-19 + |
| BPSS0643 | response regulator protein                        | 876575 | 877237 - | 220 | 53721677 | 3095245 -    | COG0745TK           | CGCAGCGCCGCCGCGCTTAAAGCGI  | 2 | 103 | 103 | 1   | 100 Bm_ATCC23344_chr2 | 2325379 | 860251  | 860353  | 99  | 506 | 2.00E-18 - |
| BPSS0644 | DNA-binding protein                               | 877398 | 878258 + | 286 | 53721678 | 3095224 -    | COG1737K            | GGTGGATGCTTACGCCGCGGCTTAA  | 2 | 103 | 1   | 103 | 100 Bm_ATCC23344_chr2 | 2325379 | 860314  | 860416  | 99  | 506 | 2.00E-18 + |
| BPSS0645 | hypothetical protein BPSS0645                     | 878644 | 878913 + | 89  | 53721679 | 3095225 -    | COG5475S            | CGGTTATTACAGACGATTGCTAATCT | 2 | 103 | 1   | 103 | 100 Bm_ATCC23344_chr2 | 2325379 | 861560  | 861662  | 100 | 515 | 7.70E-19 - |
| BPSS0647 | hypothetical protein BPSS0647                     | 879561 | 880028 - | 155 | 53721681 | 3095859 -    | COG0607P            | ATGTTACCGGAAGTTGTGCATCGCG  | 2 | 103 | 103 | 1   | 100 Bm_ATCC23344_chr2 | 2325379 | 863039  | 863141  | 99  | 506 | 2.00E-18 - |
| BPSS0648 | transcriptional activator FtrA                    | 880135 | 881091 + | 318 | 53721682 | 3095860 ftrA | COG4977K            | TCTCTCTGGGACGGTGCAGGTGGCJ  | 2 | 103 | 1   | 103 | 100 Bm_ATCC23344_chr2 | 2325379 | 863048  | 863150  | 98  | 497 | 5.00E-18 + |
| BPSS0650 | peptidase                                         | 882183 | 883634 + | 483 | 53721684 | 3095610 -    | COG0624E            | TGCTCCGGATCGGCGATATCATCGC  | 2 | 66  | 1   | 66  | 100 Bm_ATCC23344_chr2 | 2325379 | 865157  | 865222  | 100 | 330 | 1.70E-10 + |
| BPSS0651 | hypothetical protein BPSS0651                     | 883744 | 884112 + | 122 | 53721685 | 3095611 -    | COG3070K            | CGCGGGGATGTCCGTTGGCATGAI   | 2 | 103 | 1   | 103 | 100 Bm_ATCC23344_chr2 | 2325379 | 866681  | 866783  | 96  | 479 | 3.30E-17 + |
| BPSS0652 | hypothetical protein BPSS0652                     | 884644 | 885222 + | 192 | 53721686 | 3095595 -    | COG4094S            | ACGGAGGATGCGAACCTGGCGCGC   | 2 | 103 | 1   | 103 | 100 Bm_ATCC23344_chr2 | 2325379 | 867576  | 867678  | 99  | 506 | 2.00E-18 - |
| BPSS0669 | hypothetical protein BPSS0669                     | 905454 | 906683 - | 409 | 53721698 | 3095202 -    | NULL                | TGTGACAGCGCCCGCGCGGATGCG   | 2 | 103 | 1   | 103 | 100 Bm_ATCC23344_chr2 | 2325379 | 1222461 | 1222563 | 100 | 515 | 7.70E-19 + |
| BPSS0670 | transporter protein                               | 907100 | 908497 - | 465 | 53721699 | 3095203 -    | NULL                | CGCGCGCGCAACGGCAACCGGTGA   | 2 | 103 | 1   | 103 | 100 Bm_ATCC23344_chr2 | 2325379 | 1220647 | 1220749 | 100 | 515 | 7.70E-19 - |
| BPSS0672 | hypothetical protein BPSS0672                     | 911273 | 912085 + | 270 | 53721701 | 3096127 -    | NULL                | ATTTCGTTGCCGCGCGCGCTGCGJ   | 2 | 103 | 103 | 1   | 100 Bm_ATCC23344_chr2 | 2325379 | 1217972 | 1218074 | 100 | 515 | 7.70E-19 - |
| BPSS0673 | cytochrome c oxidase subunit III protein          | 912150 | 912743 + | 197 | 53721702 | 3096128 -    | COG1845C            | ACGGGCGCGCGACGCCGCGCGCGI   | 2 | 67  | 67  | 1   | 100 Bm_ATCC23344_chr2 | 2325379 | 1217095 | 1217161 | 100 | 335 | 1.00E-10 - |
| BPSS0675 | GerR family regulatory protein                    | 913160 | 914050 - | 296 | 53721704 | 3095090 -    | COG2197TK, COG2771K | CGCCGCACACGCGTTGCTCACGAGCI | 2 | 103 | 1   | 103 | 100 Bm_ATCC23344_chr2 | 2325379 | 1215098 | 1215200 | 100 | 515 | 7.70E-19 + |
| BPSS0676 | hypothetical protein BPSS0676                     | 914574 | 915398 + | 274 | 53721705 | 3095091 -    | NULL                | CGCGCGACGGAGCGGAGAACGAAAC  | 2 | 103 | 103 | 1   | 100 Bm_ATCC23344_chr2 | 2325379 | 1214672 | 1214774 | 100 | 515 | 7.70E-19 - |
| BPSS0677 | asparagine synthetase                             | 915616 | 917586 + | 656 | 53721706 | 3095912 -    | COG0367E            | GATTAATTAACGAATATTTTCTTGCT | 2 | 103 | 103 | 1   | 100 Bm_ATCC23344_chr2 | 2325379 | 1213630 | 1213732 | 98  | 497 | 5.00E-18 - |
| BPSS0680 | oxido-reductase alpha subunit                     | 920987 | 921448 - | 153 | 53721708 | 3095200 -    | COG2080C            | ATAITTTTGCAGGATTGTGTAACGCI | 2 | 103 | 1   | 103 | 100 Bm_ATCC23344_chr2 | 2325379 | 1207726 | 1207828 | 100 | 515 | 7.70E-19 + |
| BPSS0681 | AraC family regulatory protein                    | 921649 | 922632 + | 327 | 53721709 | 3095215 -    | NULL                | TGAACAATCTGCAATCCGCGGGCI   | 2 | 103 | 103 | 1   | 100 Bm_ATCC23344_chr2 | 2325379 | 1207623 | 1207725 | 99  | 506 | 2.00E-18 - |
| BPSS0682 | hypothetical protein BPSS0682                     | 922851 | 923249 + | 132 | 53721710 | 3095216 -    | NULL                | GCATCGGGCGACGCGGCGATCGGC   | 2 | 103 | 103 | 1   | 100 Bm_ATCC23344_chr2 | 2325379 | 1206419 | 1206521 | 100 | 515 | 7.70E-19 - |
| BPSS0683 | hypothetical protein BPSS0683                     | 923681 | 924037 - | 418 | 53721711 | 3095466 -    | NULL                | ATGCGACGGAGCTCAATCTTTGCGC  | 2 | 103 | 1   | 103 | 100 Bm_ATCC23344_chr2 | 2325379 | 1205135 | 1205237 | 100 | 515 | 7.70E-19 - |
| BPSS0684 | hypothetical protein BPSS0684                     | 924442 | 925680 + | 112 | 53721712 | 3095467 -    | COG1960I            | CGTATTGTGACGGCTCCGGAATAAC  | 2 | 103 | 103 | 1   | 100 Bm_ATCC23344_chr2 | 2325379 | 1204828 | 1204930 | 98  | 497 | 5.00E-18 - |
| BPSS0688 | response regulator protein                        | 929989 | 930711 - | 240 | 53721717 | 3095461 -    | COG0745TK           | TGTTGCGCGCGCCCCGCGCGCGCI   | 2 | 103 | 1   | 103 | 100 Bm_ATCC23344_chr2 | 2325379 | 1198455 | 1198557 | 100 | 515 | 7.70E-19 + |
| BPSS0689 | hypothetical protein BPSS0689                     | 930919 | 931698 + | 259 | 53721718 | 3095483 -    | NULL                | ACAATCGGACACAATCCGCACATJ   | 2 | 103 | 103 | 1   | 100 Bm_ATCC23344_chr2 | 2325379 | 1198345 | 1198447 | 99  | 506 | 2.00E-18 - |
| BPSS0692 | fumarylacetate (FAA) hydrolase family protein     | 933556 | 934245 + | 229 | 53721721 | 3095248 -    | COG0179Q            | TCGCGGGTTATACGGGTTATTCGCG  | 2 | 103 | 103 | 1   | 100 Bm_ATCC23344_chr2 | 2325379 | 1195708 | 1195810 | 99  | 506 | 2.00E-18 - |
| BPSS0695 | 3,4-dihydroxyphenylacetate 2,3-dioxygenase        | 936566 | 937414 + | 282 | 53721724 | 3094970 hpcB | COG3384S            | CGCCCGCGCACAAACGAATACATC   | 2 | 74  | 74  | 1   | 100 Bm_ATCC23344_chr2 | 2325379 | 1192701 | 1192772 | 95  | 331 | 1.60E-10 - |
| BPSS0696 | 5-carboxymethyl-2-hydroxymuconate delta-isomerase | 937472 | 937864 + | 130 | 53721725 | 3094886 hpcD | COG3232E            | GCGCGCGCGCGGTTGCTTCCGAGC   | 2 | 60  | 60  | 1   | 100 Bm_ATCC23344_chr2 | 2325379 | 1191795 | 1191854 | 100 | 300 | 4.00E-09 - |
| BPSS0699 | AraC family regulatory protein                    | 939500 | 940342 - | 280 | 53721728 | 3095824 -    | NULL                | CAGCGCCCGCGCGCGCGTATCCACI  | 2 | 103 | 1   | 103 | 100 Bm_ATCC23344_chr2 | 2325379 | 1188885 | 1188987 | 100 | 515 | 7.70E-19 + |
| BPSS0700 | zinc-binding dehydrogenase                        | 940619 | 941584 + | 321 | 53721729 | 3095287 -    | COG0640CR           | CTTGCGTGGCGCTCGCGTGGCGCG   | 2 | 103 | 103 | 1   | 100 Bm_ATCC23344_chr2 | 2325379 | 1188706 | 1188808 | 100 | 515 | 7.70E-19 - |
| BPSS0701 | outer membrane porin protein                      | 941677 | 942768 - | 363 | 53721730 | 3095288 -    | COG3203M            | GCCCGCGCGCGCGCGACCGCGCGCI  | 2 | 103 | 1   | 103 | 100 Bm_ATCC23344_chr2 | 2325379 | 1186459 | 1186561 | 99  | 506 | 2.00E-18 - |
| BPSS0703 | transmembrane ABC transporter protein             | 944313 | 946082 - | 589 | 53721732 | 3095475 -    | COG1178P            | GCCCGCGCGCTGTACGGTTCGCGC   | 2 | 102 | 1   | 102 | 100 Bm_ATCC23344_chr2 | 2325379 | 1183154 | 1183256 | 97  | 482 | 2.40E-17 + |
| BPSS0704 | periplasmic solute-binding protein                | 946182 | 947270 - | 362 | 53721733 | 3095476 -    | COG1840P            | AAAAGAAAGCGATCGTGACGAAAA   | 2 | 103 | 1   | 103 | 100 Bm_ATCC23344_chr2 | 2325379 | 1181965 | 1182067 | 100 | 515 | 7.70E-19 + |
| BPSS0705 | response regulator protein                        | 947399 | 948070 + | 223 | 53721734 | 3095674 -    | COG0745TK           | TCGAGTGACGCGGATGTGAAGCGC   | 2 | 103 | 103 | 1   | 100 Bm_ATCC23344_chr2 | 2325379 | 1181934 | 1182036 | 100 | 515 | 7.70E-19 - |
| BPSS0708 | porin protein                                     | 953131 | 954333 - | 400 | 53721737 | 3095521 -    | COG3203M            | CGTTTGGCAACCGGGCGAATCGGI   | 2 | 103 | 103 | 72  | 29 Bm_ATCC23344_chr2  | 2325379 | 1175035 | 1175066 | 100 | 160 | 0.019 -    |
| BPSS0717 | hypothetical protein BPSS0717                     | 964746 | 966038 - | 430 | 53721746 | 3095281 -    | COG3447T            | TCTTCCGCGATCGCGATCCGCGAC   | 2 | 103 | 1   | 103 | 100 Bm_ATCC23344_chr2 | 2325379 | 1516241 | 1516343 | 99  | 506 | 2.00E-18 - |
| BPSS0718 | TetR-family regulatory protein                    | 967024 | 967668 + | 214 | 53721747 | 3096272 -    | COG1309K            | TTTGCGTTGGCGCTCGCGTGGCGCG  | 2 | 103 | 103 | 1   | 100 Bm_ATCC23344_chr2 | 2325379 | 1515353 | 1515455 | 100 | 515 | 7.70E-19 - |
| BPSS0719 | family C56 unassigned peptidase                   | 968213 | 968893 + | 226 | 53721748 | 3095395 -    | COG0693R            | CGCGCGCGCGAGCGGACCGCGCGCI  | 2 | 103 | 103 | 2   | 99 Bm_ATCC23344_chr2  | 2325379 | 1514164 | 1514265 | 99  | 501 | 3.30E-18 - |
| BPSS0721 | enoyl-(acyl carrier protein) reductase            | 971275 | 972036 + | 253 | 53721750 | 3096283 -    | COG0623I            | CATACGGCGCGGTGAATGCCGCGTA  | 2 | 103 | 103 | 1   | 100 Bm_ATCC23344_chr2 | 2325379 | 1511126 | 1511228 | 100 | 515 | 7.70E-19 - |
| BPSS0723 | hypothetical protein BPSS0723                     | 972923 | 973993 + | 356 | 53721751 | 3095454 -    | COG0628R            | CGAATGTCTCGAGCGTCTTTGGCG   | 2 | 103 | 103 | 1   | 100 Bm_ATCC23344_chr2 | 2325379 | 1509484 | 1509586 | 99  | 506 | 2.00E-18 - |
| BPSS0724 | hypothetical protein BPSS0724                     | 974124 | 974519 + | 131 | 53721752 | 3096482 -    | NULL                | TTTCTGACTGTTTTTGAAGAAATTC  | 2 | 103 | 103 | 1   | 100 Bm_ATCC23344_chr2 | 2325379 | 1508288 | 1508385 | 95  | 440 | 1.90E-15 - |
| BPSS0725 | short-chain dehydrogenase                         | 974797 | 975591 - | 264 | 53721753 | 3095421 -    | COG1028IQR          | CTCGCCCGGACTCGCATCTCGCGG   | 2 | 103 | 1   | 103 | 100 Bm_ATCC23344_chr2 | 2325379 | 1506723 | 1506825 | 100 | 515 | 7.70E-19 + |
| BPSS0726 | GntR family regulatory protein                    | 975934 | 977442 - | 502 | 53721754 | 3095422 -    | COG1167KE           | CGGGGCTCTCGTATCGGCATGTTCC  | 2 | 103 | 1   | 103 | 100 Bm_ATCC23344_chr2 | 2325379 | 1504872 | 1504974 | 100 | 515 | 7.70E-19 - |
| BPSS0727 | hypothetical protein BPSS0727                     | 977546 | 978265 + | 239 | 53721755 | 3096524 -    | COG3467R            | GGCTCCAAAATTACGTAATCGGATC  | 2 | 103 | 103 | 1   | 100 Bm_ATCC23344_chr2 | 2325379 | 1504866 | 1504968 | 100 | 515 | 7.70E-19 - |
| BPSS0731 | acyl-CoA synthase                                 | 980533 | 982194 + | 553 | 53721757 | 3095220 -    | COG0318IQ           | CGCTTGCAATGACAGACGGCTCACAI | 2 | 103 | 103 | 1   | 100 Bm_ATCC23344_chr2 | 2325379 | 1501852 | 1501954 | 100 | 515 | 7.70E-19 - |
| BPSS0734 | outer membrane efflux protein                     | 985782 | 987641 - | 619 | 53721760 | 3097257 oprM | COG1538MU           | ACGCGCGGAGCGCGCTTGCCACAC   | 2 | 60  | 1   | 60  | 100 Bm_ATCC23344_chr2 | 2325379 | 1495510 | 1495569 | 100 | 300 | 4.00E-09 + |
| BPSS0738 | DNA-binding protein                               | 993595 | 993924 + | 109 | 53721764 | 3097226 -    | NULL                | TCGGGGACAGGACCGCGCGCGCGCI  | 2 | 103 | 103 | 3   | 98 Bm_ATCC23344_chr2  | 2325379 | 1489620 | 1489720 | 100 | 505 | 2.20E-18 - |
| BPSS0739 | hypothetical protein BPSS0739                     | 994808 | 995302 - | 164 | 53721766 | 3097073 -    | NULL                | GTTCCGGGACACCTTGGCGCGCGCGI | 2 | 103 | 1   | 103 | 100 Bm_ATCC23344_chr2 | 2325379 | 1487814 | 1487916 | 98  | 497 | 5.00E-18 + |
| BPSS0740 | hypothetical protein BPSS0740                     | 995453 | 996238 - | 261 | 53721767 | 3095143 -    | NULL                | GCACGCTCGCGGATCTCCACGCCAI  | 2 | 103 | 1   | 103 | 100 Bm_ATCC23344_chr2 | 2325379 | 1486877 | 1486980 | 96  | 478 | 3.60E-17 + |
| BPSS0741 | LysR family regulatory protein                    | 997157 | 998107 - | 316 | 53721768 | 3095124 -    | COG0                |                            |   |     |     |     |                       |         |         |         |     |     |            |

|           |                                                    |         |           |     |          |           |                    |                            |   |     |     |     |                       |         |         |         |     |           |            |
|-----------|----------------------------------------------------|---------|-----------|-----|----------|-----------|--------------------|----------------------------|---|-----|-----|-----|-----------------------|---------|---------|---------|-----|-----------|------------|
| BPSS0767  | hypothetical protein BPSS0767                      | 1029559 | 1029882 - | 107 | 53721793 | 3095329 - | NULL               | TTGTTCCGCCGACGACGCGATGCCT  | 2 | 103 | 103 | 1   | 100 Bm_ATCC23344_chr2 | 2325379 | 620027  | 620129  | 100 | 515       | 7.70E-19 - |
| BPSS0769  | hypothetical protein BPSS0769                      | 1030401 | 1031381 - | 326 | 53721795 | 3095308 - | COG06571           | CGCCGCCGACGCGACCTCGCGGGC   | 2 | 103 | 103 | 1   | 100 Bm_ATCC23344_chr2 | 2325379 | 625166  | 625268  | 100 | 515       | 7.70E-19 - |
| BPSS0770  | GerE family regulatory protein                     | 1031917 | 1032555 - | 212 | 53721797 | 3095096 - | COG2197TK          | GGATCCGCGCATGCGCTCGCGGCG   | 2 | 103 | 103 | 1   | 100 Bm_ATCC23344_chr2 | 2325379 | 626340  | 626442  | 99  | 506       | 2.00E-18 - |
| BPSS0772  | MarR family regulatory protein                     | 1034568 | 1035050 + | 160 | 53721799 | 3094955 - | COG1846K           | CGAATCACCGGCATCATGCCGTGK   | 2 | 103 | 1   | 103 | 100 Bm_ATCC23344_chr2 | 2325379 | 628240  | 628342  | 100 | 515       | 7.70E-19 + |
| BPSS0776  | hypothetical protein BPSS0776                      | 1036929 | 1037864 + | 311 | 53721800 | 3096873 - | COG3386G           | CGGAGCAGCCGGCGGAGCGCATG    | 2 | 103 | 1   | 103 | 100 Bm_ATCC23344_chr2 | 2325379 | 630563  | 630665  | 100 | 515       | 7.70E-19 + |
| BPSS0778  | hypothetical protein BPSS0778                      | 1038984 | 1039424 - | 146 | 53721802 | 3097229 - | COG5649S           | ACGCCCTGAGCGTCCCGTGCACTG   | 2 | 103 | 103 | 1   | 100 Bm_ATCC23344_chr2 | 2325379 | 633226  | 633328  | 100 | 515       | 7.70E-19 - |
| BPSS0785  | Idr family regulatory protein                      | 1050707 | 1051531 - | 274 | 53721809 | 3096707 - | COG1414K           | ACCTTTTGAAGTCAAGGAGACCGTG  | 2 | 103 | 103 | 1   | 100 Bm_ATCC23344_chr2 | 2325379 | 645321  | 645423  | 100 | 515       | 7.70E-19 - |
| BPSS0786  | ABC transporter, periplasmic binding protein       | 1051720 | 1052733 + | 337 | 53721810 | 3095419 - | COG1879G           | ACTTCAAAAAGTCGGTATATAAAT   | 2 | 103 | 1   | 103 | 100 Bm_ATCC23344_chr2 | 2325379 | 645412  | 645514  | 100 | 515       | 7.70E-19 + |
| BPSS0792  | short chain dehydrogenase                          | 1058226 | 1058969 + | 247 | 53721816 | 3095165 - | COG1028IQR         | CGCGCGCGAACCGGCAACTGGCGA   | 2 | 103 | 1   | 103 | 100 Bm_ATCC23344_chr2 | 2325379 | 651918  | 652020  | 100 | 515       | 7.70E-19 - |
| BPSS0793  | fumarylacetoacetate (FAA) hydrolase family protein | 1059045 | 1059887 + | 280 | 53721817 | 3095378 - | COG0179Q           | CGCGCGCGCGCGCGCGCGCGGA1    | 2 | 78  | 1   | 78  | 100 Bm_ATCC23344_chr2 | 2325379 | 652762  | 652839  | 390 | 340E-13 + |            |
| BPSS0794  | short chain dehydrogenase                          | 1060055 | 1060831 + | 258 | 53721818 | 3095376 - | COG1028IQR         | GCATGGACGCCGCGCGCGCGTGC    | 2 | 103 | 1   | 103 | 100 Bm_ATCC23344_chr2 | 2325379 | 653731  | 653833  | 100 | 515       | 7.70E-19 - |
| BPSS0797  | Idr family regulatory protein                      | 1066699 | 1070439 - | 246 | 53721822 | 3095069 - | COG1414K           | ATCCGCGGGACACAACACGAAT     | 2 | 103 | 103 | 1   | 100 Bm_ATCC23344_chr2 | 2325379 | 665116  | 665218  | 100 | 515       | 7.70E-19 - |
| BPSS0800  | TetR family regulatory protein                     | 1073131 | 1073745 - | 204 | 53721825 | 3095067 - | COG1309K           | CATTGAAACAGAACAAATGTTCTGT  | 2 | 103 | 103 | 1   | 100 Bm_ATCC23344_chr2 | 2325379 | 668422  | 668524  | 98  | 497       | 5.00E-18 - |
| BPSS0801  | hypothetical protein BPSS0801                      | 1073860 | 1074297 + | 145 | 53721826 | 3095741 - | COG2050Q           | GAAAAACAAGGACGGCAATGGTAC   | 2 | 103 | 1   | 103 | 100 Bm_ATCC23344_chr2 | 2325379 | 668439  | 668541  | 98  | 497       | 5.00E-18 + |
| BPSS0802  | outative extracellular ligand binding protein      | 1074446 | 1075588 + | 380 | 53721827 | 3095742 - | COG0683E           | GCAGCCTGGCGAACGACCGCTGCG   | 2 | 103 | 1   | 103 | 100 Bm_ATCC23344_chr2 | 2325379 | 669025  | 669127  | 98  | 497       | 5.00E-18 + |
| BPSS0803  | hemolysin                                          | 1076062 | 1076697 + | 211 | 53721828 | 3094994 - | COG1272R           | AATCAATGGCGCGCGGACGTGGCC   | 2 | 103 | 1   | 103 | 100 Bm_ATCC23344_chr2 | 2325379 | 670629  | 670731  | 98  | 497       | 5.00E-18 + |
| BPSS0804  | hypothetical protein BPSS0804                      | 1076755 | 1077132 - | 125 | 53721829 | 3095330 - | NULL               | GATCCCGGCCCACTCAATGCGACGCG | 2 | 103 | 103 | 1   | 100 Bm_ATCC23344_chr2 | 2325379 | 671797  | 671899  | 100 | 515       | 7.70E-19 - |
| BPSS0805  | hypothetical protein BPSS0805                      | 1077778 | 1079844 - | 688 | 53721830 | 3095331 - | COG3300T, COG5001T | CGTCGCGGAATGCGCCCTCGCCGAT  | 2 | 103 | 103 | 1   | 100 Bm_ATCC23344_chr2 | 2325379 | 674499  | 674601  | 100 | 515       | 7.70E-19 - |
| BPSS0806  | leucine-responsive regulatory protein              | 1080171 | 1080638 - | 155 | 53721831 | 3095387 - | COG1522K           | GTTTATTCGCCGGCGGGATGAAATG  | 2 | 103 | 103 | 1   | 100 Bm_ATCC23344_chr2 | 2325379 | 675293  | 675395  | 99  | 506       | 2.00E-18 - |
| BPSS0807  | aromatic amino acid transport protein              | 1080971 | 1082356 + | 461 | 53721832 | 3096175   | aroP               | CGCCGCGACATCCGCGCGGGCGCG   | 2 | 103 | 1   | 103 | 100 Bm_ATCC23344_chr2 | 2325379 | 675528  | 675630  | 100 | 515       | 7.70E-19 + |
| BPSS0810  | hypothetical protein BPSS0810                      | 1085445 | 1086068 + | 207 | 53721835 | 3095858 - | COG1670J           | GCGCGCTCGCGGGCTCGCGGGGA    | 2 | 103 | 1   | 103 | 100 Bm_ATCC23344_chr2 | 2325379 | 680012  | 680114  | 100 | 515       | 7.70E-19 - |
| BPSS0818  | hypothetical protein BPSS0818                      | 1102008 | 1102562 + | 184 | 53721844 | 3096109 - | NULL               | ATCAGCTGGCGCGCAATCGCGGAAT  | 2 | 103 | 1   | 103 | 100 Bm_ATCC23344_chr2 | 2325379 | 696550  | 696652  | 100 | 515       | 7.70E-19 + |
| BPSS0827  | subfamily M9A unassigned peptidase                 | 1113438 | 1115375 + | 645 | 53721853 | 3096790 - | NULL               | TGAAATGAACTCGCATATTATCGCT  | 2 | 103 | 1   | 103 | 100 Bm_ATCC23344_chr2 | 2325379 | 708008  | 708110  | 99  | 506       | 2.00E-18 + |
| BPSS0828  | hypothetical protein BPSS0828                      | 1115663 | 1116001 - | 112 | 53721854 | 3096527 - | NULL               | ACACATCGCAACATCCGATACGTTG  | 2 | 103 | 103 | 1   | 100 Bm_ATCC23344_chr2 | 2325379 | 710670  | 710772  | 100 | 515       | 7.70E-19 - |
| BPSS0829  | hypothetical protein BPSS0829                      | 1116654 | 1117820 - | 388 | 53721855 | 3095140 - | COG0654HC          | CGCGCGCTTTATAGACCTGCTATTG  | 2 | 103 | 103 | 1   | 100 Bm_ATCC23344_chr2 | 2325379 | 712482  | 712584  | 99  | 506       | 2.00E-18 - |
| BPSS0830  | DNA-binding protein                                | 1118418 | 1119161 - | 247 | 53721856 | 3095141 - | NULL               | CATCATCGCCGCGCGCGCGCGGCG   | 2 | 103 | 103 | 1   | 100 Bm_ATCC23344_chr2 | 2325379 | 713823  | 713925  | 100 | 515       | 7.70E-19 - |
| BPSS0831  | hypothetical protein BPSS0831                      | 1119533 | 1119721 + | 62  | 53721857 | 3095804 - | NULL               | AAAGGCTGGACGGCAAGCAGCAGG   | 2 | 103 | 1   | 103 | 100 Bm_ATCC23344_chr2 | 2325379 | 714097  | 714199  | 98  | 497       | 5.00E-18 - |
| BPSS0832  | hypothetical protein BPSS0832                      | 1119990 | 1120478 - | 162 | 53721858 | 3096691 - | NULL               | TCAACCGGCGCGCGCGCGCGCGCG   | 2 | 103 | 103 | 1   | 100 Bm_ATCC23344_chr2 | 2325379 | 715129  | 715231  | 99  | 506       | 2.00E-18 - |
| BPSS0833  | hypothetical protein BPSS0833                      | 1120668 | 1120958 + | 96  | 53721859 | 3096692 - | NULL               | CGCCCGGTGACGTGGGTCAAGCG    | 2 | 103 | 1   | 103 | 100 Bm_ATCC23344_chr2 | 2325379 | 715221  | 715323  | 100 | 515       | 7.70E-19 + |
| BPSS0835  | response regulator protein                         | 1121342 | 1121989 - | 215 | 53721861 | 3094906 - | COG2197TK          | GCGGCTCGCAGCGCGGACAGGGCC   | 2 | 103 | 103 | 1   | 100 Bm_ATCC23344_chr2 | 2325379 | 716633  | 716735  | 99  | 506       | 2.00E-18 - |
| BPSS0836  | universal stress protein                           | 1122557 | 1123015 + | 152 | 53721862 | 3094907 - | COG0589T           | ACGCTTTGATCTGCTCAACGGTGGG  | 2 | 103 | 1   | 103 | 100 Bm_ATCC23344_chr2 | 2325379 | 717097  | 717199  | 100 | 515       | 7.70E-19 + |
| BPSS0839  | hypothetical protein BPSS0839                      | 1124884 | 1125723 - | 279 | 53721865 | 3095018 - | COG0589T           | GCGCTTTGATCTGAGTCAAGCGCGC  | 2 | 103 | 103 | 1   | 100 Bm_ATCC23344_chr2 | 2325379 | 720371  | 720473  | 100 | 515       | 7.70E-19 - |
| BPSS0840  | zinc-binding dehydrogenase                         | 1125973 | 1127013 + | 346 | 53721866 | 3095097 - | COG0589T           | CGCGCGCGCGCGCGCTTTGACGGTG  | 2 | 103 | 1   | 103 | 100 Bm_ATCC23344_chr2 | 2325379 | 720523  | 720625  | 99  | 506       | 2.00E-18 + |
| BPSS0841  | hypothetical protein BPSS0841                      | 1127458 | 1128504 + | 348 | 53721867 | 3095145 - | COG0586S           | GATCGCGATCCAGCCGCGGACGCG   | 2 | 103 | 1   | 103 | 100 Bm_ATCC23344_chr2 | 2325379 | 722044  | 722146  | 100 | 515       | 7.70E-19 - |
| BPSS0842  | transporter protein                                | 1128693 | 1129901 + | 402 | 53721868 | 3095146 - | NULL               | ATTGCTTCGAGACATGCTCTCAGAG  | 2 | 103 | 1   | 103 | 100 Bm_ATCC23344_chr2 | 2325379 | 723279  | 723381  | 99  | 506       | 2.00E-18 + |
| BPSS0845  | proline-specific permease                          | 1133021 | 1134406 + | 461 | 53721871 | 3095836   | proY               | CGCATGAGCATGCAACATTGAGGCG  | 2 | 103 | 1   | 103 | 100 Bm_ATCC23344_chr2 | 2325379 | 727463  | 727565  | 100 | 515       | 7.70E-19 - |
| BPSS0845A | DNA-binding protein                                | 1134960 | 1135202 - | 80  | 53721872 | 3095137   | msr0960            | ACCATGTTGTATGCTGAATAGTGG   | 2 | 103 | 103 | 1   | 100 Bm_ATCC23344_chr2 | 2325379 | 729742  | 729844  | 100 | 515       | 7.70E-19 - |
| BPSS0846  | hypothetical protein BPSS0846                      | 1135347 | 1135643 + | 98  | 53721873 | 3096188 - | COG2916R           | ATTGGGCTATGATAGCGGAAAACCT  | 2 | 103 | 1   | 103 | 100 Bm_ATCC23344_chr2 | 2325379 | 729789  | 729891  | 100 | 515       | 7.70E-19 + |
| BPSS0847  | hypothetical protein BPSS0847                      | 1136037 | 1137353 - | 438 | 53721874 | 3095447 - | COG1960I           | CGTTCCGCGCGGCAATGACATCGAC  | 2 | 103 | 103 | 1   | 100 Bm_ATCC23344_chr2 | 2325379 | 731893  | 731995  | 100 | 515       | 7.70E-19 - |
| BPSS0848  | hypothetical protein BPSS0848                      | 1137775 | 1138272 - | 165 | 53721875 | 3096230 - | NULL               | ACGCGCGCGCGCGCGGCTGATGCG   | 2 | 103 | 103 | 1   | 100 Bm_ATCC23344_chr2 | 2325379 | 732812  | 732914  | 100 | 515       | 7.70E-19 - |
| BPSS0860  | flagellar hook-associated protein                  | 1151257 | 1152780 + | 507 | 53721885 | 3096005 - | COG1345N           | CTTACACAACCTTTTCAACAAACGAT | 2 | 103 | 103 | 1   | 100 Bm_ATCC23344_chr2 | 2325379 | 1476657 | 1476759 | 100 | 515       | 7.70E-19 - |
| BPSS0861  | LysR family regulatory protein                     | 1153177 | 1154076 - | 299 | 53721886 | 3097176 - | COG0583K           | GAAAAATGAAAGTGAAACGAGCT    | 2 | 92  | 1   | 92  | 100 Bm_ATCC23344_chr2 | 2325379 | 1473751 | 1473842 | 98  | 451       | 6.00E-16 + |
| BPSS0862  | hypothetical protein BPSS0862                      | 1154166 | 1154864 + | 232 | 53721887 | 3097177 - | COG3531O           | ATTGCTCAATCATGCAACAAATTT   | 2 | 92  | 92  | 1   | 100 Bm_ATCC23344_chr2 | 2325379 | 1473748 | 1473839 | 98  | 451       | 6.00E-16 - |
| BPSS0864  | aldo-keto reductase family protein                 | 1155494 | 1156441 + | 315 | 53721888 | 3096517 - | COG0667C           | AATCGCGTTTAACTCGGTTTGAAAGC | 2 | 103 | 103 | 1   | 100 Bm_ATCC23344_chr2 | 2325379 | 1472420 | 1472522 | 100 | 515       | 7.70E-19 - |
| BPSS0865  | hypothetical protein BPSS0865                      | 1156869 | 1157735 + | 288 | 53721889 | 3096518 - | NULL               | CGTTCAACCTTTCGGTTGATACCCGC | 2 | 103 | 103 | 1   | 100 Bm_ATCC23344_chr2 | 2325379 | 1470991 | 1471093 | 100 | 515       | 7.70E-19 - |
| BPSS0866  | short chain dehydrogenase                          | 1157810 | 1158565 + | 251 | 53721890 | 3096883 - | COG1028IQR         | ACGGCGTCGATTGAGGCGCGCGG    | 2 | 77  | 77  | 1   | 100 Bm_ATCC23344_chr2 | 2325379 | 1470050 | 1470126 | 100 | 385       | 5.70E-13 - |
| BPSS0867  | GerE family regulatory protein                     | 1159092 | 1159799 + | 235 | 53721891 | 3096754 - | COG2771K           | GAAGAAGCTTGGCGACGTTTTCGGC  | 2 | 103 | 103 | 1   | 100 Bm_ATCC23344_chr2 | 2325379 | 1468852 | 1468954 | 98  | 497       | 5.00E-18 - |
| BPSS0868  | phenylacetaldehyde dehydrogenase                   | 1160056 | 1161558 + | 500 | 53721892 | 3095384   | feaB               | GCTAACCGGGCGGGAAACCGCGTCT  | 2 | 103 | 103 | 1   | 100 Bm_ATCC23344_chr2 | 2325379 | 1467888 | 1467990 | 100 | 515       | 7.70E-19 - |
| BPSS0870  | amino acid permease                                | 1163154 | 1164644 + | 496 | 53721894 | 3095068 - | COG0531E           | GGCGAAGCGCGGCTCGCGCGCTT    | 2 | 103 | 103 | 1   | 100 Bm_ATCC23344_chr2 | 2325379 | 1464790 | 1464892 | 100 | 515       | 7.70E-19 - |
| BPSS0873  | porin protein                                      | 1166507 | 1167709 + | 400 | 53721897 | 3096602 - | COG3203M           | GGCCCAAAATTTTCCCGGATAGAGT  | 2 | 103 | 103 | 1   | 100 Bm_ATCC23344_chr2 | 2325379 | 1461437 | 1461539 | 100 | 515       | 7.70E-19 - |
| BPSS0875  | LysE type translocator                             | 1168399 | 1169010 - | 203 | 53721899 | 3096877 - | COG1280E           | TCACGTGTGAATGGCGATGTCGCGA  | 2 | 103 | 1   | 103 | 100 Bm_ATCC23344_chr2 | 2325379 | 1458846 | 1458948 | 100 | 515       | 7.70E-19 + |
| BPSS0876  | GNAT family acetyltransferase                      | 1169182 | 1169661 + | 159 | 53721900 | 3095180 - | NULL               | CCGATCAGCACATCGCCATGTCACCA | 2 | 103 | 103 | 1   | 100 Bm_ATCC23344_chr2 | 2325379 | 1458772 | 1458874 | 97  | 488       | 1.30E-17 - |
| BPSS0878  | ArsR family regulatory protein                     | 1170913 | 1171218 - | 101 | 53721902 | 3097093 - | COG0640K           | GGATTTCATGCGCCCTAGTCAATAG  | 2 | 103 | 1   | 103 | 100 Bm_ATCC23344_chr2 | 2325379 | 1456638 | 1456740 | 100 | 515       | 7.70E-19 + |
| BPSS0879  | porin protein                                      | 1172547 | 1173671 + | 374 | 53721903 | 3096508 - | COG3203M           | CAGGTAGTTTCCGACCGGATATGCG  | 2 | 103 | 103 | 1   | 100 Bm_ATCC23344_chr2 | 2325379 | 1455406 | 1455508 | 100 | 515       | 7.70E-19 - |
| BPSS0880  | transcription elongation factor                    | 1173890 | 1174300 - | 136 | 53721904 |           |                    |                            |   |     |     |     |                       |         |         |         |     |           |            |

|          |                                                |         |           |      |          |              |           |                            |   |     |     |     |                       |         |         |         |     |     |            |
|----------|------------------------------------------------|---------|-----------|------|----------|--------------|-----------|----------------------------|---|-----|-----|-----|-----------------------|---------|---------|---------|-----|-----|------------|
| BPSS0912 | AsnC family regulatory protein                 | 1206483 | 1206965 - | 160  | 53721936 | 3094914 -    | COG1522K  | AGAAAGCTAGCAGGAAAATGCTT    | 2 | 103 | 1   | 103 | 100 Bm_ATCC23344_chr2 | 2325379 | 1420858 | 1420960 | 98  | 497 | 5.00E-18 + |
| BPSS0913 | methionine gamma-lyase                         | 1207153 | 1208454 + | 433  | 53721937 | 3096921 -    | COG0626E  | CTGTAGTCTTCTTACACTGAGTGC   | 2 | 103 | 103 | 1   | 100 Bm_ATCC23344_chr2 | 2325379 | 1420768 | 1420870 | 99  | 506 | 2.00E-18 - |
| BPSS0914 | hypothetical protein BPSS0914                  | 1208622 | 1208846 + | 74   | 53721938 | 3096922 -    | NULL      | TCTTCGGCGAATCGCAACATCGCA   | 2 | 103 | 1   | 103 | 100 Bm_ATCC23344_chr2 | 2325379 | 1418977 | 1419079 | 100 | 515 | 7.70E-19 + |
| BPSS0915 | hypothetical protein BPSS0915                  | 1209283 | 1209984 + | 233  | 53721939 | 3096282 -    | NULL      | GCGCGGAAGTGTGTAACATCGTTT   | 2 | 103 | 103 | 1   | 100 Bm_ATCC23344_chr2 | 2325379 | 1418638 | 1418740 | 99  | 506 | 2.00E-18 - |
| BPSS0916 | N-hydroxyarylamine O-acetyltransferase         | 1210101 | 1210973 + | 290  | 53721940 | 3095584 -    | COG2162Q  | GCGCGCCGATATGCGCGCGCGCGC   | 2 | 103 | 103 | 1   | 100 Bm_ATCC23344_chr2 | 2325379 | 1417820 | 1417922 | 100 | 515 | 7.70E-19 - |
| BPSS0917 | hypothetical protein BPSS0917                  | 1211259 | 1211816 + | 185  | 53721941 | 3095585 -    | COG3554S  | TACCGTTCAAAGTTCGCGTGACGG   | 2 | 103 | 103 | 1   | 100 Bm_ATCC23344_chr2 | 2325379 | 1416652 | 1416754 | 97  | 488 | 1.30E-17 - |
| BPSS0918 | DNA-binding protein                            | 1211936 | 1212397 - | 153  | 53721942 | 3095408 -    | COG1959K  | AGTTTACAAAAGAACGCGAGCTTGT  | 2 | 103 | 1   | 103 | 100 Bm_ATCC23344_chr2 | 2325379 | 1415416 | 1415518 | 100 | 515 | 7.70E-19 - |
| BPSS0919 | hypothetical protein BPSS0919                  | 1212527 | 1213438 + | 303  | 53721943 | 3096911 -    | COG0492O  | ATCTACCACTGCGTCGACAGCTGAA  | 2 | 103 | 103 | 1   | 100 Bm_ATCC23344_chr2 | 2325379 | 1415384 | 1415486 | 99  | 506 | 2.00E-18 - |
| BPSS0927 | hypothetical protein BPSS0927                  | 1223235 | 1223885 - | 216  | 53721951 | 3095052 -    | NULL      | GCCCTTCGCGATAATGAACGGCC    | 2 | 103 | 1   | 103 | 100 Bm_ATCC23344_chr2 | 2325379 | 1411132 | 1411234 | 100 | 515 | 7.70E-19 - |
| BPSS0928 | aliphatic sulfonates binding protein precursor | 1224086 | 1225069 - | 132  | 53721952 | 3095053 -    | COG0715P  | GGCAATGCTTGGTTCGCGGGCGG    | 2 | 103 | 1   | 103 | 100 Bm_ATCC23344_chr2 | 2325379 | 1409962 | 1410064 | 100 | 515 | 7.70E-19 + |
| BPSS0929 | hypothetical protein BPSS0929                  | 1225194 | 1226000 - | 268  | 53721953 | 3095715 -    | COG0789K  | CACGCGCGGTGCGGCTAAATCGG    | 2 | 81  | 1   | 81  | 100 Bm_ATCC23344_chr2 | 2325379 | 1409053 | 1409133 | 100 | 405 | 7.20E-14 + |
| BPSS0930 | phosphothiricin N-acetyltransferase            | 1226079 | 1226645 - | 188  | 53721954 | 3097010 -    | COG1247M  | CGCCCCGCGCGCCACGCTTGCA     | 2 | 103 | 1   | 103 | 100 Bm_ATCC23344_chr2 | 2325379 | 1408386 | 1408488 | 97  | 488 | 1.30E-17 + |
| BPSS0932 | membrane transport protein                     | 1228206 | 1229720 - | 504  | 53721956 | 3095364 -    | NULL      | GGCCGGTAACCAATGGAAATCTTC   | 2 | 103 | 1   | 103 | 100 Bm_ATCC23344_chr2 | 2325379 | 1405319 | 1405421 | 100 | 515 | 7.70E-19 + |
| BPSS0933 | methyl-accepting chemotaxis protein            | 1229959 | 1231515 + | 518  | 53721957 | 3097215 -    | COG0840NT | GCCGCATCGCTTGAGGCGCTCAAK   | 2 | 103 | 103 | 1   | 100 Bm_ATCC23344_chr2 | 2325379 | 1405178 | 1405280 | 100 | 515 | 7.70E-19 - |
| BPSS0934 | hypothetical protein BPSS0934                  | 1231748 | 1233412 - | 554  | 53721958 | 3097216 -    | COG0210L  | CGACGCTGGTGCGCCCGCAAGCCG   | 2 | 103 | 1   | 103 | 100 Bm_ATCC23344_chr2 | 2325379 | 1401628 | 1401730 | 99  | 506 | 2.00E-18 + |
| BPSS0935 | hypothetical protein BPSS0935                  | 1234055 | 1234963 - | 302  | 53721959 | 3096206 -    | COG0745TK | ACACTAGTGCGCAGGACGAATCTTC  | 2 | 103 | 1   | 103 | 100 Bm_ATCC23344_chr2 | 2325379 | 1400077 | 1400179 | 100 | 515 | 7.70E-19 + |
| BPSS0936 | hypothetical protein BPSS0936                  | 1235142 | 1236470 + | 442  | 53721960 | 3094952 -    | COG0665E  | AGTTGCTGCTCGGCACTAGTGTGCG  | 2 | 103 | 103 | 1   | 100 Bm_ATCC23344_chr2 | 2325379 | 1399996 | 1400098 | 100 | 515 | 7.70E-19 - |
| BPSS0937 | hypothetical protein BPSS0937                  | 1236747 | 1237856 + | 369  | 53721961 | 3094953 -    | COG1226P  | GAGCCCGCGCTCCCAACGCACCC    | 2 | 103 | 103 | 1   | 100 Bm_ATCC23344_chr2 | 2325379 | 1398400 | 1398502 | 99  | 506 | 2.00E-18 - |
| BPSS0939 | carboxymuconolactone decarboxylase             | 1239185 | 1239583 + | 132  | 53721963 | 3097273 -    | COG0599S  | GACCTGAGACGACGAAGCGCGCGC   | 2 | 103 | 103 | 1   | 100 Bm_ATCC23344_chr2 | 2325379 | 1395964 | 1396066 | 99  | 497 | 5.00E-18 - |
| BPSS0942 | hypothetical protein BPSS0942                  | 1242298 | 1243464 - | 388  | 53721966 | 3096029 -    | COG4645S  | TAGCAATGCCGCACTTCGTATCGG   | 2 | 103 | 1   | 103 | 100 Bm_ATCC23344_chr2 | 2325379 | 1391869 | 1391971 | 100 | 515 | 7.70E-19 + |
| BPSS0943 | porin protein                                  | 1243885 | 1245039 + | 384  | 53721967 | 3096030 -    | COG3203M  | GGAATGCGCTGGACATGCCCGCGA   | 2 | 103 | 103 | 1   | 100 Bm_ATCC23344_chr2 | 2325379 | 1391546 | 1391648 | 100 | 515 | 7.70E-19 - |
| BPSS0944 | LysR family regulatory protein                 | 1245541 | 1246452 - | 303  | 53721968 | 3096786 -    | COG0583K  | ATGCGGAACCGCGGAAGCGGACCT   | 2 | 103 | 1   | 103 | 100 Bm_ATCC23344_chr2 | 2325379 | 1388881 | 1388983 | 99  | 506 | 2.00E-18 + |
| BPSS0945 | subfamily M23B unassigned peptidase            | 1247073 | 1248020 + | 315  | 53721969 | 3094901 -    | COG0739M  | TGCCCGCTCGGATTTGTGATCATGT  | 2 | 103 | 103 | 1   | 100 Bm_ATCC23344_chr2 | 2325379 | 1388361 | 1388463 | 99  | 506 | 2.00E-18 - |
| BPSS0948 | hypothetical protein BPSS0948                  | 1249773 | 1250645 + | 290  | 53721971 | 3094902 -    | COG0583K  | CAACGTCCGCACTTTCGCTATCGTG  | 2 | 103 | 103 | 1   | 100 Bm_ATCC23344_chr2 | 2325379 | 1385621 | 1385723 | 100 | 515 | 7.70E-19 - |
| BPSS0949 | hypothetical protein BPSS0949                  | 1250756 | 1251091 - | 111  | 53721972 | 3096121 -    | NULL      | AAGTTTTGCGATGCCCTCGCGTTAT  | 2 | 103 | 1   | 103 | 100 Bm_ATCC23344_chr2 | 2325379 | 1384206 | 1384308 | 100 | 515 | 7.70E-19 + |
| BPSS0956 | hypothetical protein BPSS0956                  | 1258000 | 1258890 - | 296  | 53721979 | 3095513 -    | COG1737K  | CGCTATAACGATGATTTTGGGTA'   | 2 | 103 | 1   | 103 | 100 Bm_ATCC23344_chr2 | 2325379 | 1376413 | 1376515 | 100 | 515 | 7.70E-19 + |
| BPSS0957 | hypothetical protein BPSS0957                  | 1259881 | 1261092 - | 403  | 53721980 | 3095514 -    | NULL      | TTATCTCGAAATCAGTATGTCACAA  | 2 | 103 | 1   | 103 | 100 Bm_ATCC23344_chr2 | 2325379 | 1374211 | 1374313 | 99  | 506 | 2.00E-18 - |
| BPSS0958 | hypothetical protein BPSS0958                  | 1261382 | 1263367 + | 661  | 53721981 | 3095059 -    | COG3501S  | TGAAAAGGCGCTATTAAATCTTGT   | 2 | 103 | 103 | 1   | 100 Bm_ATCC23344_chr2 | 2325379 | 1374019 | 1374121 | 100 | 515 | 7.70E-19 - |
| BPSS0959 | hypothetical protein BPSS0959                  | 1263459 | 1263899 + | 146  | 53721982 | 3096496 -    | COG5435S  | CCGGCGGGCGCGCGGGCGCGGA'    | 2 | 94  | 94  | 1   | 100 Bm_ATCC23344_chr2 | 2325379 | 1371942 | 1372035 | 100 | 470 | 8.30E-17 - |
| BPSS0960 | Rhs-related membrane protein                   | 1263951 | 1268576 + | 1541 | 53721983 | 3096497 -    | COG3209M  | TGCCGGGAGGCGACGCGGTTATTC   | 2 | 54  | 54  | 1   | 100 Bm_ATCC23344_chr2 | 2325379 | 1371456 | 1371509 | 100 | 270 | 9.00E-08 - |
| BPSS0962 | extracellular serine protease precursor        | 1270105 | 1273500 + | 1131 | 53721985 | 3095427 -    | COG4625S  | AAAGAGAGTGGAGGCGGCTCAATTC  | 2 | 103 | 103 | 1   | 100 Bm_ATCC23344_chr2 | 2325379 | 1365302 | 1365404 | 100 | 515 | 7.70E-19 - |
| BPSS0964 | periplasmic solute-binding protein             | 1274424 | 1276016 - | 530  | 53721987 | 3095768 -    | COG0747E  | TGACGCGGGCGAGCGGGGTCTCGC   | 2 | 103 | 1   | 103 | 100 Bm_ATCC23344_chr2 | 2325379 | 1359295 | 1359397 | 99  | 506 | 2.00E-18 - |
| BPSS0965 | oxalate decarboxylase                          | 1276302 | 1277564 + | 420  | 53721988 | 3095557 -    | COG2140GR | TTTGACGGTTTGTATTAACTTCGTG  | 2 | 103 | 103 | 1   | 100 Bm_ATCC23344_chr2 | 2325379 | 1359107 | 1359209 | 98  | 497 | 5.00E-18 - |
| BPSS0967 | hypothetical protein BPSS0967                  | 1279448 | 1279900 - | 150  | 53721990 | 3096307 -    | COG4682S  | CATCCAATTCCAGGCCCGCGGAGT   | 2 | 103 | 1   | 103 | 100 Bm_ATCC23344_chr2 | 2325379 | 1355447 | 1355549 | 100 | 515 | 7.70E-19 - |
| BPSS0969 | molybdopterin oxidoreductase                   | 1281070 | 1283394 - | 774  | 53721992 | 3096066 -    | COG0243C  | CTCTTTTTCTTCCGGCAAGGTGTGCT | 2 | 103 | 1   | 103 | 100 Bm_ATCC23344_chr2 | 2325379 | 1351953 | 1352055 | 100 | 515 | 7.70E-19 + |
| BPSS0970 | GntR family regulatory protein                 | 1283573 | 1284991 - | 472  | 53721993 | 3096058 -    | COG1167KE | CACCTTGCGGGAAAGAAAAGAGCT   | 2 | 103 | 103 | 1   | 100 Bm_ATCC23344_chr2 | 2325379 | 1351872 | 1351974 | 100 | 515 | 7.70E-19 - |
| BPSS0971 | DNA-binding protein                            | 1285062 | 1285421 + | 119  | 53721994 | 3095231 -    | NULL      | GGGCGGGGGATGAAGACGCAAGC    | 2 | 73  | 73  | 1   | 100 Bm_ATCC23344_chr2 | 2325379 | 1350383 | 1350455 | 98  | 356 | 1.20E-11 - |
| BPSS0972 | hypothetical protein BPSS0972                  | 1285528 | 1286271 - | 247  | 53721995 | 3095232 -    | NULL      | CGCGAAGCGTTTCGCTCCCGCATCC  | 2 | 78  | 1   | 78  | 100 Bm_ATCC23344_chr2 | 2325379 | 1349049 | 1349126 | 100 | 390 | 3.40E-13 + |
| BPSS0973 | Mgt(2+) transport ATPase, P-type 2             | 1286347 | 1289133 - | 928  | 53721996 | 3095370 mgtB | COG0474P  | GATTACGGCGAAGCGCGCGGACGAT  | 2 | 103 | 1   | 103 | 100 Bm_ATCC23344_chr2 | 2325379 | 1346162 | 1346264 | 100 | 515 | 7.70E-19 - |
| BPSS0975 | hypothetical protein BPSS0975                  | 1293047 | 1293562 + | 171  | 53721998 | 3096900 -    | NULL      | TGTTCAAATACCGGGAACGACCTA   | 2 | 103 | 103 | 1   | 100 Bm_ATCC23344_chr2 | 2325379 | 1342360 | 1342462 | 100 | 515 | 7.70E-19 + |
| BPSS0979 | porin protein                                  | 1297191 | 1298306 + | 371  | 53722002 | 3095833 -    | COG3203M  | GCGCGCGCGCGGACGTTGTTTGA    | 2 | 55  | 55  | 1   | 100 Bm_ATCC23344_chr2 | 2325379 | 1338216 | 1338270 | 100 | 275 | 5.30E-08 - |
| BPSS0980 | hypothetical protein BPSS0980                  | 1298505 | 1299308 - | 267  | 53722003 | 3095066 -    | NULL      | CGCGGAACACGGCACGCGCGCGG    | 2 | 103 | 1   | 103 | 100 Bm_ATCC23344_chr2 | 2325379 | 1336001 | 1336103 | 100 | 515 | 7.70E-19 + |
| BPSS0981 | histidine transport system permease protein    | 1299775 | 1300464 + | 299  | 53722004 | 3094969 hisQ | COG4215E  | GTCGAACCGGTCGCAAGCTTTCAC   | 2 | 103 | 103 | 1   | 100 Bm_ATCC23344_chr2 | 2325379 | 1335632 | 1335734 | 100 | 515 | 7.70E-19 - |
| BPSS0983 | histidine transport ATP-binding protein        | 1301243 | 1302010 + | 225  | 53722006 | 3095049 hisP | COG4598E  | CGCGCGCGCGGACGCGCGCGGG     | 2 | 71  | 71  | 1   | 100 Bm_ATCC23344_chr2 | 2325379 | 1334164 | 1334234 | 100 | 355 | 1.30E-11 - |
| BPSS0985 | hypothetical protein BPSS0985                  | 1303632 | 1304126 + | 164  | 53722008 | 3096585 -    | COG3791S  | GGTGGCGATAAGGCGGGCGCTCTC   | 2 | 103 | 103 | 1   | 100 Bm_ATCC23344_chr2 | 2325379 | 1331791 | 1331893 | 98  | 497 | 5.00E-18 - |
| BPSS0986 | hypothetical protein BPSS0986                  | 1304382 | 1305131 + | 249  | 53722009 | 3096469 -    | NULL      | GGTGAACGGTTGAGCGGATTGAC    | 2 | 103 | 103 | 1   | 100 Bm_ATCC23344_chr2 | 2325379 | 1331043 | 1331145 | 100 | 515 | 7.70E-19 - |
| BPSS0987 | hypothetical protein BPSS0987                  | 1305249 | 1305593 - | 114  | 53722010 | 3095847 -    | NULL      | TGTTTTCGAATTCGCGGGAACATCG  | 2 | 103 | 1   | 103 | 100 Bm_ATCC23344_chr2 | 2325379 | 1329734 | 1329836 | 99  | 506 | 2.00E-18 + |
| BPSS0993 | catalase precursor                             | 1310767 | 1312284 + | 505  | 53722014 | 3095083 katB | COG0753P  | GCGCGATAGAAATGATGAATTCAT   | 2 | 103 | 103 | 1   | 100 Bm_ATCC23344_chr2 | 2325379 | 1323450 | 1323552 | 100 | 515 | 7.70E-19 - |
| BPSS0994 | hypothetical protein BPSS0994                  | 1312677 | 1314146 + | 489  | 53722015 | 3095065 -    | COG0500QR | CGGCTGCGGCGACGCGCGCGCTC    | 2 | 103 | 1   | 103 | 100 Bm_ATCC23344_chr2 | 2325379 | 1319901 | 1320003 | 99  | 506 | 2.00E-18 + |
| BPSS0995 | AraC family regulatory protein                 | 1314324 | 1315883 - | 519  | 53722016 | 3096304 -    | NULL      | CGCCGCCGCTCATTCGCCGGCTCAT  | 2 | 103 | 1   | 103 | 100 Bm_ATCC23344_chr2 | 2325379 | 1318164 | 1318266 | 99  | 506 | 2.00E-18 - |
| BPSS0996 | Rieske iron-sulphur domain protein             | 1316050 | 1317054 - | 334  | 53722017 | 3096639 -    | COG4638PR | GCCGGGCGCGTGCGCCGGCGAACC   | 2 | 103 | 1   | 103 | 100 Bm_ATCC23344_chr2 | 2325379 | 1316993 | 1317095 | 100 | 515 | 7.70E-19 + |
| BPSS0999 | acyl carrier protein                           | 1320172 | 1320411 - | 79   | 53722020 | 3095102 -    | NULL      | GTGATCAACCCGATCGCCCGCCG    | 2 | 56  | 1   | 56  | 100 Bm_ATCC23344_chr2 | 2325379 | 1313749 | 1313804 | 100 | 280 | 3.20E-08 + |
| BPSS1004 | acyl transferase                               | 1324682 | 1325866 - | 394  | 53722025 | 3095813 -    | COG0331I  | CGTGCACGACGCGGCGGACATCGAC  | 2 | 103 | 1   | 103 | 100 Bm_ATCC23344_chr2 | 2325379 | 1306952 | 1307054 | 100 | 515 | 7.70E-19 + |
| BPSS1013 | hypothetical protein BPSS1013                  | 1385187 | 1385600 - | 137  | 53722034 | 3095210 -    | COG1846K  | GAGGCGGGAGCTCGACACCATGAAT  | 2 | 103 | 1   | 103 | 100 Bm_ATCC23344_chr2 | 2325379 |         |         |     |     |            |

|           |                                                     |         |           |      |          |               |                    |                             |   |     |     |     |                       |         |         |         |     |     |            |
|-----------|-----------------------------------------------------|---------|-----------|------|----------|---------------|--------------------|-----------------------------|---|-----|-----|-----|-----------------------|---------|---------|---------|-----|-----|------------|
| BPSS1239  | family S11 unassigned peptidase                     | 1673068 | 1674069 + | 333  | 53722262 | 3097132 -     | COG1686M           | GCCGCGCATTTGCGCTCTGCCGCTTC  | 2 | 103 | 1   | 103 | 100 Bm_ATCC23344_chr2 | 2325379 | 1123337 | 1123439 | 100 | 515 | 7.70E-19 + |
| BPSS1240  | penicillin-binding protein                          | 1674424 | 1676136 + | 570  | 53722263 | 3095351 ftsI  | COG0768M           | TGCCCGGCCGAATGCGCGTGCCCGC   | 2 | 103 | 1   | 103 | 100 Bm_ATCC23344_chr2 | 2325379 | 1124660 | 1124762 | 99  | 506 | 2.00E-18 + |
| BPSS1241  | bifunctional reductase                              | 1676705 | 1680961 - | 1418 | 53722264 | 3095935 -     | COG0243C, COG0369P | CGCGCGCATTCGGCGGATAGCGAC    | 2 | 61  | 61  | 1   | 100 Bm_ATCC23344_chr2 | 2325379 | 1131329 | 1131389 | 100 | 305 | 2.04E-09 - |
| BPSS1244  | nitrate transporter                                 | 1683992 | 1685317 - | 441  | 53722267 | 3096246 -     | COG2223P           | TCCGCGCCGGCAACGGGCTTCCTGG   | 2 | 103 | 103 | 1   | 100 Bm_ATCC23344_chr2 | 2325379 | 1135700 | 1135802 | 100 | 515 | 7.70E-19 - |
| BPSS1246  | response regulator protein                          | 1687254 | 1687850 + | 198  | 53722269 | 3096027 -     | COG3707T           | CGCGCGGAGCGCGGCGCGGCGAC     | 2 | 103 | 1   | 103 | 100 Bm_ATCC23344_chr2 | 2325379 | 1137523 | 1137625 | 100 | 515 | 7.70E-19 - |
| BPSS1249  | lipoprotein                                         | 1691427 | 1693619 + | 730  | 53722272 | 3095693 -     | NULL               | CGATTCAAGCTGCAITTCGGCAGATG  | 2 | 103 | 1   | 103 | 100 Bm_ATCC23344_chr2 | 2325379 | 1141665 | 1141767 | 100 | 515 | 7.70E-19 + |
| BPSS1252  | inner membrane transport protein                    | 1696611 | 1697945 - | 444  | 53722275 | 3095027 -     | NULL               | ATTCTTAAAGATAAATACTAGAATT   | 2 | 103 | 103 | 1   | 100 Bm_ATCC23344_chr2 | 2325379 | 1148290 | 1148392 | 100 | 515 | 7.70E-19 - |
| BPSS1253  | LysR family transcriptional regulator               | 1698134 | 1699072 + | 312  | 53722276 | 3095028 -     | COG0583K           | TATCTTAAAGATAAATTTCAITTAATC | 2 | 103 | 1   | 103 | 100 Bm_ATCC23344_chr2 | 2325379 | 1148381 | 1148483 | 99  | 506 | 2.00E-18 + |
| BPSS1255  | LysR family transcriptional regulator               | 1699715 | 1700722 - | 335  | 53722277 | 3095633 -     | COG0583K           | TGGATGGGACGAATATCGGCCAT     | 2 | 103 | 103 | 1   | 100 Bm_ATCC23344_chr2 | 2325379 | 1151028 | 1151130 | 100 | 515 | 7.70E-19 - |
| BPSS1256  | short-chain type dehydrogenase/reductase            | 1700846 | 1701589 + | 247  | 53722278 | 3095634 -     | COG1028IQR         | TAAAGCAAATGGGAATGATATCC     | 2 | 103 | 1   | 103 | 100 Bm_ATCC23344_chr2 | 2325379 | 1151054 | 1151156 | 100 | 515 | 7.70E-19 + |
| BPSS1258  | oxidoreductase/dehydrogenase                        | 1704390 | 1705427 - | 345  | 53722280 | 3095455 -     | COG2130R           | CGCGCGCGCGCTTCGCCCGTTCCG    | 2 | 67  | 67  | 1   | 100 Bm_ATCC23344_chr2 | 2325379 | 1155692 | 1155758 | 100 | 335 | 1.00E-10 - |
| BPSS1260  | hypothetical protein BPSS1260                       | 1708563 | 1710377 + | 708  | 53722282 | 3095492 -     | NULL               | CGTCCGCGCTCGCTCTCCGCGCTG    | 2 | 103 | 1   | 103 | 100 Bm_ATCC23344_chr2 | 2325379 | 1158641 | 1158743 | 100 | 515 | 7.70E-19 + |
| BPSS1261  | hypothetical protein BPSS1261                       | 1710619 | 1710951 - | 110  | 53722283 | 3097112 -     | COG4390S           | GGCGTGGCGCGCGCGCGCGGAG      | 2 | 103 | 103 | 1   | 100 Bm_ATCC23344_chr2 | 2325379 | 1161127 | 1161229 | 98  | 497 | 5.00E-18 - |
| BPSS1262  | hypothetical protein BPSS1262                       | 1711200 | 1711982 + | 260  | 53722284 | 3097113 -     | NULL               | CGCGCCGAAGCGCGCGCTCGCCCG    | 2 | 103 | 1   | 103 | 100 Bm_ATCC23344_chr2 | 2325379 | 1161293 | 1161395 | 99  | 506 | 2.00E-18 + |
| BPSS1277  | cobalt-nickel-resistance system transmembrane prot  | 1743703 | 1744773 + | 356  | 53722299 | 3096702 cnrT  | NULL               | GGCGAATCGCGCGCGCGCGCGGCA    | 2 | 103 | 103 | 1   | 100 Bm_ATCC23344_chr2 | 2325379 | 1040195 | 1040297 | 100 | 515 | 7.70E-19 - |
| BPSS1285  | family C39 unassigned peptidase                     | 1755323 | 1757467 - | 714  | 53722308 | 3095622 -     | COG2274V           | CTGTCTCTCGCGGTGCTCCGCGCCG   | 2 | 103 | 1   | 103 | 100 Bm_ATCC23344_chr2 | 2325379 | 1027561 | 1027663 | 100 | 515 | 7.70E-19 + |
| BPSS1286  | LysR family transcriptional regulator               | 1757583 | 1757801 - | 72   | 53722309 | 3095038 -     | NULL               | CTTTGGTTGGCAATCGGAGGAATC    | 2 | 103 | 1   | 103 | 100 Bm_ATCC23344_chr2 | 2325379 | 1027227 | 1027329 | 100 | 515 | 7.70E-19 + |
| BPSS1286a | hypothetical protein BPSS1286a                      | 1758015 | 1758188 - | 57   | 53722310 | 3095982 -     | NULL               | AATCGCAGCGATAAAAAAATAACG    | 2 | 103 | 1   | 103 | 100 Bm_ATCC23344_chr2 | 2325379 | 1026840 | 1026942 | 100 | 515 | 7.70E-19 - |
| BPSS1287  | outer membrane efflux protein                       | 1758557 | 1759897 - | 446  | 53722311 | 3095983 -     | COG1538MU          | GGAGACGGAGATTTTGAACACAGA    | 2 | 103 | 103 | 1   | 100 Bm_ATCC23344_chr2 | 2325379 | 1026569 | 1026671 | 100 | 515 | 7.70E-19 - |
| BPSS1288  | gamma-glutamyltransferase 1                         | 1760116 | 1761837 - | 573  | 53722312 | 3095085 -     | NULL               | ACGAAACCCCATTTTGTATACGGCG   | 2 | 103 | 1   | 103 | 100 Bm_ATCC23344_chr2 | 2325379 | 1023213 | 1023315 | 98  | 497 | 5.00E-18 + |
| BPSS1289  | hypothetical protein BPSS1289                       | 1762739 | 1763257 + | 172  | 53722313 | 3095284 -     | NULL               | GCTCCGAGAATTTCCCTCGCGCGCC   | 2 | 103 | 103 | 1   | 100 Bm_ATCC23344_chr2 | 2325379 | 1022443 | 1022545 | 100 | 515 | 7.70E-19 - |
| BPSS1290  | hypothetical protein BPSS1290                       | 1763600 | 1764118 + | 172  | 53722314 | 3095285 -     | NULL               | CGCGCGGTTCGGCGCGCGCGGTGCTC  | 2 | 103 | 103 | 1   | 100 Bm_ATCC23344_chr2 | 2325379 | 1021595 | 1021697 | 100 | 515 | 7.70E-19 - |
| BPSS1292  | amino acid permease                                 | 1770212 | 1771507 + | 431  | 53722316 | 3095434 -     | COG0531E           | CGCGCGCTCGCGCGCGCGTACCGGG   | 2 | 103 | 103 | 1   | 100 Bm_ATCC23344_chr2 | 2325379 | 1013887 | 1013989 | 100 | 515 | 7.70E-19 - |
| BPSS1295  | 3-deoxy-7-phosphoheptulonate synthase               | 1773286 | 1774404 + | 372  | 53722319 | 3096312 aroG  | NULL               | CGCGTTTGCGCGCAGCGCAGCGCGCA  | 2 | 103 | 103 | 1   | 100 Bm_ATCC23344_chr2 | 2325379 | 1010739 | 1010841 | 100 | 515 | 7.70E-19 - |
| BPSS1297  | regulatory protein                                  | 1776176 | 1776465 - | 489  | 53722321 | 3094958 -     | NULL               | TCCGCGCGCGCGTTCGATCGCGCG    | 2 | 103 | 4   | 103 | 97 Bm_ATCC23344_chr2  | 2325379 | 1006180 | 1006279 | 100 | 500 | 3.70E-18 + |
| BPSS1298  | hypothetical protein BPSS1298                       | 1778359 | 1779030 + | 223  | 53722322 | 3095336 -     | NULL               | GGCGTCGAGCGCGCTGTCCGCGCG    | 2 | 103 | 103 | 1   | 100 Bm_ATCC23344_chr2 | 2325379 | 1005605 | 1005707 | 99  | 506 | 2.00E-18 + |
| BPSS1299  | LysR family transcriptional regulator               | 1779761 | 1780765 - | 334  | 53722323 | 3094910 -     | COG0583K           | GTCTCCAGATTGATGATGTCAAGG    | 2 | 103 | 1   | 103 | 100 Bm_ATCC23344_chr2 | 2325379 | 1003089 | 1003191 | 99  | 506 | 2.00E-18 + |
| BPSS1300  | proteocatechuate 3,4-dioxygenase                    | 1780873 | 1781577 + | 234  | 53722324 | 3095333 pcaH  | COG3485Q           | AGTTATACGATTTCGGATAAAACAT   | 2 | 103 | 103 | 1   | 100 Bm_ATCC23344_chr2 | 2325379 | 1003079 | 1003181 | 100 | 515 | 7.70E-19 - |
| BPSS1305  | ABC transport permease                              | 1785706 | 1786626 - | 306  | 53722329 | 3097026 -     | COG0601EP          | ATCTCGCGATTTCGCCCGCGCGGG    | 2 | 103 | 1   | 103 | 100 Bm_ATCC23344_chr2 | 2325379 | 997417  | 997519  | 99  | 506 | 2.00E-18 + |
| BPSS1309  | RpiI family regulatory protein                      | 1791684 | 1792646 - | 320  | 53722333 | 3095872 -     | COG1737K           | GCGGGGGTCTGCGCGCGATCGGACC   | 2 | 103 | 1   | 103 | 100 Bm_ATCC23344_chr2 | 2325379 | 991429  | 991532  | 99  | 505 | 2.20E-18 + |
| BPSS1310  | BCCT (betaine/carnitine/choline) family transporter | 1792979 | 1795009 + | 676  | 53722334 | 3097064 -     | COG1292M           | GGCGCTTCGCGCGCGCGCGCGCATTC  | 2 | 103 | 103 | 1   | 100 Bm_ATCC23344_chr2 | 2325379 | 991194  | 991296  | 100 | 515 | 7.70E-19 - |
| BPSS1311  | esterase                                            | 1795244 | 1796458 - | 404  | 53722335 | 3095112 estA  | COG1680V           | TCCGCGGACGCGCGCGGCGAGTTCC   | 2 | 103 | 1   | 103 | 100 Bm_ATCC23344_chr2 | 2325379 | 987456  | 987558  | 100 | 515 | 7.70E-19 - |
| BPSS1312  | hypothetical protein BPSS1312                       | 1797052 | 1798512 + | 486  | 53722337 | 3095031 -     | NULL               | TCTCGCGCGCGCGCGCGCGCTAGGC   | 2 | 103 | 103 | 1   | 100 Bm_ATCC23344_chr2 | 2325379 | 986960  | 987062  | 98  | 497 | 5.00E-18 - |
| BPSS1313  | hypothetical protein BPSS1313                       | 1799023 | 1799664 - | 213  | 53722338 | 3096066 -     | NULL               | ATCCGCGATGATAGTGCGCTGAAAC   | 2 | 103 | 103 | 1   | 100 Bm_ATCC23344_chr2 | 2325379 | 985012  | 985114  | 97  | 488 | 1.30E-17 - |
| BPSS1315  | isoleucyl-tRNA synthetase                           | 1800598 | 1803501 - | 967  | 53722340 | 3094966 ileS2 | COG0060J           | TCCGCGCGCGCGCGCGCGCGCGCCC   | 2 | 86  | 1   | 86  | 100 Bm_ATCC23344_chr2 | 2325379 | 980465  | 980550  | 100 | 430 | 5.30E-15 + |
| BPSS1318  | D-lactate dehydrogenase                             | 1805789 | 1807282 - | 497  | 53722343 | 3095538 -     | COG0277C           | CGACCGCGCGCAACCGCGCGCGGG    | 2 | 85  | 1   | 85  | 100 Bm_ATCC23344_chr2 | 2325379 | 976604  | 976688  | 96  | 398 | 1.50E-13 - |
| BPSS1319  | hypothetical protein BPSS1319                       | 1807422 | 1807718 - | 98   | 53722344 | 3095299 -     | NULL               | CGATGCGCGGCGACGGCGCGCGCGC   | 2 | 63  | 1   | 63  | 100 Bm_ATCC23344_chr2 | 2325379 | 976253  | 976315  | 100 | 315 | 8.30E-10 + |
| BPSS1321  | hypothetical protein BPSS1321                       | 1808641 | 1809741 - | 366  | 53722346 | 3095932 -     | NULL               | GGGCGCGCGGGATCGAGCGCGTCC    | 2 | 103 | 1   | 103 | 100 Bm_ATCC23344_chr2 | 2325379 | 974189  | 974291  | 98  | 497 | 5.00E-18 + |
| BPSS1322  | AraC family transcriptional regulatory protein      | 1810477 | 1811349 + | 290  | 53722347 | 3094941 -     | NULL               | GACATCGAAACACCGCGCGCGCTG    | 2 | 103 | 103 | 1   | 100 Bm_ATCC23344_chr2 | 2325379 | 973551  | 973653  | 99  | 506 | 2.00E-18 - |
| BPSS1323  | hypothetical protein BPSS1323                       | 1811570 | 1812529 - | 319  | 53722348 | 3096632 -     | NULL               | CCCGCGCGATTCCGGATTCCGGACJ   | 2 | 103 | 1   | 103 | 100 Bm_ATCC23344_chr2 | 2325379 | 971428  | 971530  | 98  | 497 | 5.00E-18 + |
| BPSS1324  | D-cysteine desulfhydrase                            | 1812770 | 1813786 - | 338  | 53722349 | 3096633 -     | COG2515E           | ATCGTTTTTAAACATGAGGCATCGCT  | 2 | 103 | 1   | 103 | 100 Bm_ATCC23344_chr2 | 2325379 | 970171  | 970273  | 100 | 515 | 7.70E-19 - |
| BPSS1325  | AsnC family leucine-responsive regulatory protein   | 1813979 | 1814488 + | 169  | 53722350 | 3097167 lrp   | COG1522K           | AAAAACGATCGGGGAATAACAGGGTH  | 2 | 103 | 103 | 1   | 100 Bm_ATCC23344_chr2 | 2325379 | 970076  | 970178  | 100 | 515 | 7.70E-19 - |
| BPSS1326  | hypothetical protein BPSS1326                       | 1814887 | 1816338 - | 483  | 53722351 | 3096550 -     | COG1432S           | GGCGCGCGCGCGCGCGGATTTCCG    | 2 | 103 | 103 | 4   | 97 Bm_ATCC23344_chr2  | 2325379 | 969137  | 969236  | 99  | 491 | 9.30E-18 - |
| BPSS1327  | MFS family sugar transporter protein                | 1816540 | 1817895 - | 451  | 53722352 | 3096778 -     | NULL               | CCAAATTCATCTATATGTTTCATGA   | 2 | 103 | 1   | 103 | 100 Bm_ATCC23344_chr2 | 2325379 | 966024  | 966126  | 99  | 506 | 2.00E-18 + |
| BPSS1328  | GntR-family transcriptional regulator               | 1818003 | 1818728 - | 241  | 53722353 | 3096779 -     | COG2188K           | TTACCGGTGCGAGCTGTGCTGAATTG  | 2 | 103 | 103 | 1   | 100 Bm_ATCC23344_chr2 | 2325379 | 966014  | 966116  | 99  | 506 | 2.00E-18 - |
| BPSS1329  | MFS family transport protein                        | 1818788 | 1820212 + | 474  | 53722354 | 3096551 -     | NULL               | CGCGCGGTTCGCGCGATAGCGGAG    | 2 | 62  | 62  | 1   | 100 Bm_ATCC23344_chr2 | 2325379 | 965229  | 965290  | 96  | 292 | 9.10E-09 - |
| BPSS1330  | hypothetical protein BPSS1330                       | 1820264 | 1821151 + | 295  | 53722355 | 3097088 -     | COG3618R           | AGTTTCGGCGCGGATTCGTCGCGC    | 2 | 54  | 54  | 1   | 100 Bm_ATCC23344_chr2 | 2325379 | 963753  | 963806  | 100 | 270 | 9.00E-08 - |
| BPSS1331  | phosphatase protein                                 | 1821570 | 1823045 + | 491  | 53722356 | 3097089 -     | NULL               | CACGCGCCCCGAGCGCGCGCGCCG    | 2 | 103 | 103 | 1   | 100 Bm_ATCC23344_chr2 | 2325379 | 962517  | 962618  | 97  | 482 | 2.40E-17 - |
| BPSS1333  | hypothetical protein BPSS1333                       | 1824843 | 1825703 + | 286  | 53722358 | 3097199 -     | COG3315Q           | GCATGCGGAAGCTCAGGCGGACAT    | 2 | 103 | 103 | 1   | 100 Bm_ATCC23344_chr2 | 2325379 | 959172  | 959274  | 99  | 506 | 2.00E-18 - |
| BPSS1334  | hypothetical protein BPSS1334                       | 1826391 | 1826663 + | 90   | 53722359 | 3097200 -     | NULL               | CTAATCGCGCCCCCTCCATCCCAACC  | 2 | 103 | 103 | 1   | 100 Bm_ATCC23344_chr2 | 2325379 | 957635  | 957737  | 97  | 488 | 1.30E-17 - |
| BPSS1335  | hypothetical protein BPSS1335                       | 1827019 | 1827231 + | 70   | 53722360 | 3096197 -     | NULL               | GGCGCGGTGCGCGCTTCTCCAGGCC   | 2 | 103 | 103 | 1   | 100 Bm_ATCC23344_chr2 | 2325379 | 956996  | 957097  | 98  | 491 | 9.30E-18 - |
| BPSS1339  | ArsR family regulatory protein                      | 1829021 | 1829368 - | 115  | 53722364 | 3095311 -     | COG0640K           | CGACACCTTGCAATTCGTCAITTCAC  | 2 | 103 | 1   | 103 | 100 Bm_ATCC23344_chr2 | 2325379 | 954583  | 954685  | 100 | 515 | 7.70E-19 + |
| BPSS1340  | transmembrane cytochrome b561                       | 1829882 | 1830415 + | 177  | 53722365 | 3095312 -     | COG3038C           | CCATAAGAATCGCCCGCGGATAATCC  | 2 | 103 | 103 | 1   | 100 Bm_ATCC23344_chr2 | 2325379 | 954140  | 954242  | 99  | 506 | 2.00E-18 - |
| BPSS1344  | serine acetyltransferase                            | 1834030 | 1835019 - | 329  | 53722369 | 3097027 -     | COG1045E           | CGCGCGGGATCGCGCGCGCGCGGG    | 2 | 103 | 1   | 103 | 100 Bm_ATCC23344_chr2 | 2325379 | 948913  | 949015  | 99  | 506 | 2.00E-18 + |
| BPSS1345  | hypothetical protein BPSS1345                       | 1835134 | 1835601 - | 155  | 53722370 |               |                    |                             |   |     |     |     |                       |         |         |         |     |     |            |

|          |                                                      |         |           |     |          |              |                    |                            |   |     |     |     |                       |         |         |         |     |     |            |
|----------|------------------------------------------------------|---------|-----------|-----|----------|--------------|--------------------|----------------------------|---|-----|-----|-----|-----------------------|---------|---------|---------|-----|-----|------------|
| BPSS1422 | hypothetical protein BPSS1422                        | 1935909 | 1936808 - | 299 | 53722449 | 3095592 -    | NULL               | CCGCATGGACGGCGCCCGCGCTCC   | 2 | 103 | 1   | 103 | 100 Bm_ATCC23344_chr2 | 2325379 | 578356  | 578458  | 99  | 506 | 2.00E-18 + |
| BPSS1423 | glycine betaine/L-proline-binding protein ABC transp | 1937183 | 1938133 - | 316 | 53722450 | 3096295 -    | COG2113E           | ACGCATTGAAACAACGCGGCTGGCC  | 2 | 103 | 1   | 103 | 100 Bm_ATCC23344_chr2 | 2325379 | 577072  | 577174  | 100 | 515 | 7.70E-19 - |
| BPSS1424 | AraC transcriptional regulatory protein              | 1938234 | 1939232 - | 332 | 53722451 | 3096864 -    | COG4977K           | CGCGGGTTTITTCGCTCTCTCGTIT  | 2 | 103 | 1   | 103 | 100 Bm_ATCC23344_chr2 | 2325379 | 575973  | 576075  | 100 | 515 | 7.70E-19 + |
| BPSS1426 | glycine betaine/L-proline transport ATP-binding prot | 1940250 | 1941419 - | 389 | 53722453 | 3095234 -    | COG4175E           | AAGCGTTTGTGCAATTCTCGTCGGCT | 2 | 103 | 1   | 103 | 100 Bm_ATCC23344_chr2 | 2325379 | 573786  | 573888  | 100 | 515 | 7.70E-19 + |
| BPSS1428 | hypothetical protein BPSS1428                        | 1943447 | 1943662 + | 71  | 53722455 | 3095879 -    | NULL               | CGTTTCGTCCGGCGGGATGATTTCG  | 2 | 103 | 103 | 1   | 100 Bm_ATCC23344_chr2 | 2325379 | 571839  | 571941  | 100 | 515 | 7.70E-19 - |
| BPSS1429 | hypothetical protein BPSS1429                        | 1943761 | 1944660 + | 299 | 53722456 | 3096411 -    | NULL               | CGCGCGCCGGCGGATGTCGCGCGGA  | 2 | 101 | 101 | 1   | 100 Bm_ATCC23344_chr2 | 2325379 | 571525  | 571625  | 100 | 505 | 2.20E-18 - |
| BPSS1433 | sodium bile acid symporter family protein            | 1946525 | 1947595 + | 356 | 53722460 | 3096313 -    | COG0798P           | CCGTTTCGATCCGGCGCGCGGAAAC  | 2 | 65  | 65  | 1   | 100 Bm_ATCC23344_chr2 | 2325379 | 568751  | 568815  | 100 | 325 | 2.90E-10 - |
| BPSS1444 | hypothetical protein BPSS1444                        | 1967536 | 1968717 - | 399 | 53722467 | 3095412 -    | NULL               | CGGGCGCGCGCGCGGTACGGCGGCT  | 2 | 103 | 1   | 103 | 100 Bm_ATCC23344_chr2 | 2325379 | 833041  | 833143  | 100 | 515 | 7.70E-19 + |
| BPSS1445 | biotin carboxylase                                   | 1968819 | 1970813 - | 664 | 53722468 | 3095238 -    | COG4770I           | GACCTTCGGCGCGCGCGCGCGCGCC  | 2 | 103 | 1   | 103 | 100 Bm_ATCC23344_chr2 | 2325379 | 830945  | 831047  | 100 | 515 | 7.70E-19 - |
| BPSS1448 | acyl-coA dehydrogenase                               | 1973410 | 1974591 - | 393 | 53722471 | 3095407 -    | COG1960I           | GAAAATTTCCGACGATATGGCAAT   | 2 | 103 | 1   | 103 | 100 Bm_ATCC23344_chr2 | 2325379 | 827148  | 827250  | 98  | 497 | 5.00E-18 + |
| BPSS1449 | TetR family transcriptional regulator                | 1974799 | 1975563 + | 254 | 53722472 | 3097213 -    | COG1309K           | AACCGCCGACGCGCGCGGGAACAC   | 2 | 103 | 103 | 1   | 100 Bm_ATCC23344_chr2 | 2325379 | 826966  | 827068  | 100 | 515 | 7.70E-19 - |
| BPSS1452 | copper nitrite reductase protein                     | 1978963 | 1980426 + | 487 | 53722473 | 3095134 -    | COG2132Q           | GCACGAGCCGCGATCCGCGCGCTCG  | 2 | 103 | 103 | 1   | 100 Bm_ATCC23344_chr2 | 2325379 | 822859  | 822961  | 99  | 506 | 2.00E-18 - |
| BPSS1454 | hypothetical protein BPSS1454                        | 1984227 | 1985591 + | 454 | 53722475 | 3095104 -    | NULL               | TCTGCGCGAGCTGACGCGGCACTC   | 2 | 103 | 103 | 1   | 100 Bm_ATCC23344_chr2 | 2325379 | 817460  | 817562  | 100 | 515 | 7.70E-19 - |
| BPSS1456 | hypothetical protein BPSS1456                        | 1986772 | 1987392 + | 206 | 53722477 | 3095005 -    | NULL               | CAAAATCTCACACGAATCCGATCGA  | 2 | 103 | 103 | 1   | 100 Bm_ATCC23344_chr2 | 2325379 | 815077  | 815179  | 99  | 506 | 2.00E-18 - |
| BPSS1457 | hypothetical protein BPSS1457                        | 1987533 | 1988546 + | 337 | 53722478 | 3095006 -    | NULL               | AGGCGTCTTCGGCTTTCATGCGCGC  | 2 | 103 | 103 | 1   | 100 Bm_ATCC23344_chr2 | 2325379 | 814316  | 814418  | 100 | 515 | 7.70E-19 - |
| BPSS1458 | MFS family transport protein                         | 1989047 | 1990465 - | 472 | 53722479 | 3097090 -    | NULL               | TGCCGGAACCCCGCGCGGACCGCG   | 2 | 103 | 1   | 103 | 100 Bm_ATCC23344_chr2 | 2325379 | 811207  | 811309  | 99  | 506 | 2.00E-18 + |
| BPSS1459 | acetyltransferase protein                            | 1990568 | 1991350 - | 260 | 53722480 | 3097091 -    | COG1670J           | TGCGCGGCACCCGTTGGCCAGCGGCI | 2 | 103 | 1   | 103 | 100 Bm_ATCC23344_chr2 | 2325379 | 810289  | 810391  | 100 | 515 | 7.70E-19 + |
| BPSS1461 | two-component response regulator                     | 1993328 | 1993987 - | 219 | 53722482 | 3095218 -    | COG0745TK          | CGGTACTCGAAGCGAAGCTTGGCA   | 2 | 103 | 1   | 103 | 100 Bm_ATCC23344_chr2 | 2325379 | 807652  | 807754  | 99  | 506 | 2.00E-18 - |
| BPSS1462 | hypothetical protein BPSS1462                        | 1994219 | 1994575 + | 118 | 53722483 | 3095219 -    | COG5591S           | CGAGCGCATTTAGAACCAACGGA    | 2 | 103 | 103 | 1   | 100 Bm_ATCC23344_chr2 | 2325379 | 807551  | 807653  | 99  | 506 | 2.00E-18 - |
| BPSS1466 | aldehyde dehydrogenase family protein                | 1999417 | 2000928 - | 503 | 53722487 | 3096623 -    | COG1012C           | GCCCGTTCGCTTGCATGCGCGCGCG  | 2 | 103 | 1   | 103 | 100 Bm_ATCC23344_chr2 | 2325379 | 800637  | 800739  | 100 | 515 | 7.70E-19 + |
| BPSS1468 | hypothetical protein BPSS1468                        | 2002377 | 2003396 - | 339 | 53722489 | 3096260 -    | NULL               | GTGAATTTCCGCGCACCAGAATCCF  | 2 | 103 | 1   | 103 | 100 Bm_ATCC23344_chr2 | 2325379 | 798289  | 798391  | 99  | 506 | 2.00E-18 + |
| BPSS1469 | LysR family transcriptional regulator                | 2003571 | 2004479 + | 302 | 53722490 | 3096070 -    | COG0583K           | ATGGAATCTCGGTGCGCGCAAAATCA | 2 | 103 | 103 | 1   | 100 Bm_ATCC23344_chr2 | 2325379 | 798212  | 798314  | 100 | 515 | 7.70E-19 - |
| BPSS1471 | TetR family transcriptional regulator                | 2006630 | 2007328 + | 232 | 53722493 | 3095626 -    | COG1309K           | AGCCCGGAGTCCGGGCAAAAGCGCG  | 2 | 55  | 55  | 1   | 100 Bm_ATCC23344_chr2 | 2325379 | 795174  | 795228  | 100 | 275 | 5.30E-08 - |
| BPSS1473 | hypothetical protein BPSS1473                        | 2009252 | 2011057 - | 601 | 53722495 | 3096613 -    | COG1502I           | ACTTCATCGGAGCTTCACACGGAC   | 2 | 103 | 1   | 103 | 100 Bm_ATCC23344_chr2 | 2325379 | 792118  | 792220  | 100 | 515 | 7.70E-19 + |
| BPSS1474 | DeoR family transcriptional regulator                | 2011759 | 2012517 - | 252 | 53722496 | 3096929 -    | COG1349KG          | GCGGCGCATCGGCGGCGCGCGCGC   | 2 | 103 | 1   | 103 | 100 Bm_ATCC23344_chr2 | 2325379 | 790633  | 790735  | 100 | 515 | 7.70E-19 - |
| BPSS1476 | mannitol dehydrogenase protein                       | 2014766 | 2016235 - | 489 | 53722498 | 3096662 -    | NULL               | AGAGGATGTAGCTTTACACGAT     | 2 | 103 | 1   | 103 | 100 Bm_ATCC23344_chr2 | 2325379 | 786877  | 786979  | 98  | 497 | 5.00E-18 + |
| BPSS1480 | hypothetical protein BPSS1480                        | 2020393 | 2020578 + | 61  | 53722502 | 3095632 -    | NULL               | AACCTGCAAGCAATTCAGATTTCIT  | 2 | 103 | 103 | 1   | 100 Bm_ATCC23344_chr2 | 2325379 | 782812  | 782914  | 99  | 506 | 2.00E-18 - |
| BPSS1481 | hypothetical protein BPSS1481                        | 2020691 | 2021569 + | 292 | 53722503 | 3095004 -    | NULL               | GCAGGCGCGCGGACGATGACGGTIT  | 2 | 103 | 103 | 1   | 100 Bm_ATCC23344_chr2 | 2325379 | 782514  | 782616  | 100 | 515 | 7.70E-19 - |
| BPSS1482 | NAD(+) synthetase                                    | 2021925 | 2022779 + | 284 | 53722504 | 3097154 nadE | COG0171H           | GCACACCCGACGACCGGATGACAA   | 2 | 103 | 103 | 1   | 100 Bm_ATCC23344_chr2 | 2325379 | 781191  | 781293  | 100 | 515 | 7.70E-19 - |
| BPSS1483 | TetR family transcriptional regulator                | 2023034 | 2024068 - | 444 | 53722505 | 3095007 -    | COG1309K           | CGCCAATCGTCTGTTTGTGCAACGA  | 2 | 103 | 1   | 103 | 100 Bm_ATCC23344_chr2 | 2325379 | 778959  | 779061  | 100 | 515 | 7.70E-19 + |
| BPSS1484 | hypothetical protein BPSS1484                        | 2024180 | 2025397 + | 305 | 53722506 | 3095008 -    | NULL               | GGACGACCGCTGAGACGCGCGCTCT  | 2 | 103 | 103 | 1   | 100 Bm_ATCC23344_chr2 | 2325379 | 778945  | 779047  | 100 | 515 | 7.70E-19 - |
| BPSS1487 | anaerobically induced outer membrane protein         | 2027135 | 2028697 + | 520 | 53722509 | 3096319 -    | COG2010C, COG2132Q | CGCGCGCGCGCGCGCCCTTAAAGAT  | 2 | 103 | 103 | 1   | 100 Bm_ATCC23344_chr2 | 2325379 | 775989  | 776091  | 97  | 488 | 1.30E-17 - |
| BPSS1490 | N-acetylmuramoyl-L-alanine amidase                   | 2031208 | 2032233 + | 341 | 53722512 | 3095176 -    | COG3023V           | ACTGCGATCGCTTCCATGCGGGCG   | 2 | 103 | 103 | 1   | 100 Bm_ATCC23344_chr2 | 2325379 | 771916  | 772018  | 100 | 515 | 7.70E-19 - |
| BPSS1491 | hypothetical protein BPSS1491                        | 2032502 | 2033761 + | 419 | 53722513 | 3096138 -    | NULL               | AAGCGCGACGAGCGCGCGCAAGGI   | 2 | 103 | 103 | 1   | 100 Bm_ATCC23344_chr2 | 2325379 | 770603  | 770705  | 99  | 506 | 2.00E-18 - |
| BPSS1495 | two-component regulator sensor kinase                | 2038711 | 2040555 - | 614 | 53722517 | 3096752 -    | COG0642T           | CGCGCTCTGTGTTGGGATGAAGA    | 2 | 103 | 1   | 103 | 100 Bm_ATCC23344_chr2 | 2325379 | 762832  | 762934  | 100 | 515 | 7.70E-19 + |
| BPSS1496 | hypothetical protein BPSS1496                        | 2040815 | 2041309 + | 169 | 53722518 | 3096753 -    | NULL               | CTTCCGCGCGCGATGCGGCTTTTGA  | 2 | 103 | 103 | 1   | 100 Bm_ATCC23344_chr2 | 2325379 | 762670  | 762772  | 100 | 515 | 7.70E-19 - |
| BPSS1498 | hypothetical protein BPSS1498                        | 2043052 | 2043561 + | 164 | 53722520 | 3095204 -    | NULL               | CCGGCATCGCACGCGCGGACGCGCG  | 2 | 103 | 103 | 1   | 100 Bm_ATCC23344_chr2 | 2325379 | 760433  | 760535  | 99  | 506 | 2.00E-18 - |
| BPSS1508 | hypothetical protein BPSS1508                        | 2057929 | 2058606 + | 225 | 53722530 | 3096370 -    | COG3521S           | CCCCGCGCGCGGACGCGCGCGCC    | 2 | 103 | 103 | 1   | 100 Bm_ATCC23344_chr2 | 2325379 | 745502  | 745604  | 100 | 515 | 7.70E-19 - |
| BPSS1512 | hypothetical protein BPSS1512                        | 2065185 | 2066609 + | 474 | 53722534 | 3096758 -    | NULL               | TGCCGCTTCGCTCTCCGCGCGCATCC | 2 | 103 | 103 | 1   | 100 Bm_ATCC23344_chr2 | 2325379 | 737587  | 737689  | 100 | 515 | 7.70E-19 - |
| BPSS1513 | hypothetical protein BPSS1513                        | 2066773 | 2067066 + | 97  | 53722535 | 3096713 -    | NULL               | ACGCGTCTCGCTCGCGGCTTCGCTT  | 2 | 103 | 103 | 1   | 100 Bm_ATCC23344_chr2 | 2325379 | 736569  | 736671  | 98  | 497 | 5.00E-18 - |
| BPSS1521 | hypothetical protein BPSS1521                        | 2073665 | 2074108 - | 147 | 53722542 | 3095465 -    | NULL               | CGTACCGCGCGGAGGCGCGCGGCG   | 2 | 103 | 103 | 1   | 100 Bm_ATCC23344_chr2 | 2325379 | 1648417 | 1648519 | 100 | 515 | 7.70E-19 - |
| BPSS1522 | two-component response regulator                     | 2074346 | 2075017 - | 223 | 53722543 | 3096722 -    | COG2197TK          | AGGGCATGCGCTGGCGGCTGGGGCG  | 2 | 103 | 103 | 1   | 100 Bm_ATCC23344_chr2 | 2325379 | 1649344 | 1649446 | 99  | 506 | 2.00E-18 - |
| BPSS1523 | chaperone                                            | 2075253 | 2075708 - | 151 | 53722544 | 3096082 bicP | NULL               | CGCGGGCGCGCGGAGCGGTGGGCT   | 2 | 103 | 103 | 1   | 100 Bm_ATCC23344_chr2 | 2325379 | 1650043 | 1650145 | 98  | 497 | 5.00E-18 - |
| BPSS1524 | intercellular spread protein                         | 2075849 | 2077387 - | 512 | 53722545 | 3096275 bopA | NULL               | GCGCGCCGCGCGGCGCGCGGCGCTC  | 2 | 103 | 103 | 1   | 100 Bm_ATCC23344_chr2 | 2325379 | 1651733 | 1651835 | 100 | 515 | 7.70E-19 - |
| BPSS1529 | membrane antigen                                     | 2082841 | 2083773 - | 310 | 53722550 | 3096115 bipD | NULL               | AGGCGGGCGCGCGGATCGCGCGCT   | 2 | 64  | 64  | 1   | 100 Bm_ATCC23344_chr2 | 2325379 | 1658160 | 1658223 | 100 | 320 | 4.90E-10 - |
| BPSS1530 | HNS-like regulatory protein                          | 2083835 | 2084125 - | 96  | 53722551 | 3096413 bprA | COG2916R           | GCGCGGCGCTCGCCCGCGCGCGCC   | 2 | 103 | 103 | 1   | 100 Bm_ATCC23344_chr2 | 2325379 | 1658524 | 1658626 | 100 | 515 | 7.70E-19 - |
| BPSS1533 | surface presentation of antigens protein             | 2087441 | 2087956 - | 171 | 53722554 | 3096042 bicA | NULL               | ATTTTCCCCGCGCGCGCGCGGCTGAF | 2 | 103 | 103 | 1   | 100 Bm_ATCC23344_chr2 | 2325379 | 1662343 | 1662445 | 100 | 515 | 7.70E-19 - |
| BPSS1546 | AraC-family regulator of type III secretion system   | 2100565 | 2101206 - | 213 | 53722567 | 3096570 bsaN | NULL               | TAAGTTTCGATTGGTGTTGGTTTCA  | 2 | 103 | 103 | 1   | 100 Bm_ATCC23344_chr2 | 2325379 | 1675607 | 1675709 | 100 | 515 | 7.70E-19 - |
| BPSS1547 | type III secretion system protein                    | 2101717 | 2103003 + | 428 | 53722568 | 3096220 -    | NULL               | ATTATCCGGTTACGATCGACGGCA   | 2 | 103 | 1   | 103 | 100 Bm_ATCC23344_chr2 | 2325379 | 1676020 | 1676122 | 100 | 515 | 7.70E-19 + |
| BPSS1549 | Type III secretion system protein                    | 2103329 | 2103631 + | 100 | 53722570 | 3095550 -    | NULL               | CCCTCTCTACCGCTCGGGACGACAC  | 2 | 62  | 62  | 1   | 100 Bm_ATCC23344_chr2 | 2325379 | 1677673 | 1677729 | 91  | 235 | 3.40E-06 + |
| BPSS1553 | hypothetical protein BPSS1553                        | 2106912 | 2107883 + | 323 | 53722574 | 3095781 -    | COG3710K           | GCGCGGACGCGCGGCTTCCACACG   | 2 | 103 | 1   | 103 | 100 Bm_ATCC23344_chr2 | 2325379 | 1681225 | 1681327 | 100 | 515 | 7.70E-19 + |
| BPSS1555 | family M4 unassigned peptidase                       | 2109379 | 2111076 + | 565 | 53722576 | 3095651 -    | COG3227E           | CTAGCATCGCTTCGACGTTCGAAGC  | 2 | 103 | 1   | 103 | 100 Bm_ATCC23344_chr2 | 2325379 | 1683658 | 1683760 | 100 | 515 | 7.70E-19 - |
| BPSS1556 | MarR-family transcriptional regulator                | 2112198 | 2112686 - | 162 | 53722577 | 3095003 -    | COG1846K           | CGACGCGCCCGCGCGCGCGGAAAC   | 2 | 103 | 103 | 1   | 100 Bm_ATCC23344_chr2 | 2325379 | 1687047 | 1687149 | 97  | 488 | 1.30E-17 - |
| BPSS1557 | glyoxalase                                           | 2113012 | 2113470 + | 152 | 53722578 | 3096288 -    | COG0346E           | GTTAACTACTACTACTCGAACCGGAG | 2 | 103 | 1   | 103 | 100 Bm_ATCC23344_chr2 | 2325379 | 1687275 | 1687378 | 96  | 478 | 3.60E-17 + |
| BPSS1558 | alpha-ketoglutarate permease                         | 2114037 | 2115356 + | 439 | 53722579 | 30949        |                    |                            |   |     |     |     |                       |         |         |         |     |     |            |

|          |                                                      |         |           |      |          |           |      |                      |                           |   |     |     |     |                       |         |         |         |     |     |            |
|----------|------------------------------------------------------|---------|-----------|------|----------|-----------|------|----------------------|---------------------------|---|-----|-----|-----|-----------------------|---------|---------|---------|-----|-----|------------|
| BPSS1587 | agmatinase                                           | 2158918 | 2159871 + | 317  | 53722610 | 3096603   | speB | COG0010E             | TTCGAACTTCGGGATTCAAGTCGCC | 2 | 103 | 1   | 103 | 100 Bm_ATCC23344_chr2 | 2325379 | 1732330 | 1732432 | 99  | 506 | 2.00E-18 + |
| BPSS1588 | hypothetical protein BPSS1588                        | 2160486 | 2161886 + | 466  | 53722611 | 3097129 - |      | NULL                 | CGTTCGCCGCCCATCTGATCCGAA  | 2 | 103 | 1   | 103 | 100 Bm_ATCC23344_chr2 | 2325379 | 1733894 | 1733996 | 99  | 506 | 2.00E-18 + |
| BPSS1591 | hypothetical protein BPSS1591                        | 2164673 | 2165557 + | 294  | 53722614 | 3095725 - |      | NULL                 | CCCGCGCTCGACGATGCGGGCGCG  | 2 | 103 | 1   | 103 | 100 Bm_ATCC23344_chr2 | 2325379 | 1738067 | 1738169 | 99  | 506 | 2.00E-18 + |
| BPSS1592 | type III secretion system protein                    | 2165625 | 2167430 - | 601  | 53722615 | 3095726 - |      | COG1450NU            | CGTGGCCGCCGCCGCCGCCGCTG   | 2 | 103 | 103 | 1   | 100 Bm_ATCC23344_chr2 | 2325379 | 1740916 | 1741018 | 100 | 515 | 7.70E-19 - |
| BPSS1601 | type IV pilus biosynthesis protein                   | 2176601 | 2177170 - | 189  | 53722624 | 3096323 - |      | NULL                 | CGAAGCGAGTCCGACGCTGGCGAC  | 2 | 103 | 103 | 1   | 100 Bm_ATCC23344_chr2 | 2325379 | 1750657 | 1750759 | 100 | 515 | 7.70E-19 - |
| BPSS1602 | twitching motility protein                           | 2177487 | 2178593 + | 368  | 53722625 | 3095406   | piIT | COG2805NU, COG5008NU | CAAAAGCTAGTTGGTCATGCAAAAT | 2 | 103 | 1   | 103 | 100 Bm_ATCC23344_chr2 | 2325379 | 1750876 | 1750978 | 100 | 515 | 7.70E-19 + |
| BPSS1605 | probable two-component system sensor kinase          | 2181394 | 2182479 - | 361  | 53722628 | 3095321 - |      | COG0642T             | CTGGACAAGCGCTTCGAATCGG1   | 2 | 103 | 103 | 1   | 100 Bm_ATCC23344_chr2 | 2325379 | 1755973 | 1756075 | 100 | 515 | 7.70E-19 - |
| BPSS1606 | hypothetical protein BPSS1606                        | 2182607 | 2183251 - | 214  | 53722629 | 3096533 - |      | NULL                 | CGCGCGCGCGCGCGCGCGCATGC   | 2 | 103 | 103 | 1   | 100 Bm_ATCC23344_chr2 | 2325379 | 1756745 | 1756848 | 96  | 478 | 3.60E-17 - |
| BPSS1607 | hypothetical protein BPSS1607                        | 2183466 | 2183954 - | 120  | 53722630 | 3096161 - |      | NULL                 | TTGCGCGCGCAGCGCTCGCTTCGC  | 2 | 103 | 1   | 103 | 100 Bm_ATCC23344_chr2 | 2325379 | 1756856 | 1756958 | 98  | 497 | 5.00E-18 + |
| BPSS1608 | hypothetical protein BPSS1608                        | 2184499 | 2185161 - | 262  | 53722631 | 3096162 - |      | COG1670J             | GCGAAGCGATGCACGCGCGCACGA  | 2 | 103 | 103 | 1   | 100 Bm_ATCC23344_chr2 | 2325379 | 1758628 | 1758730 | 100 | 515 | 7.70E-19 - |
| BPSS1609 | hypothetical protein BPSS1609                        | 2185370 | 2186017 - | 215  | 53722632 | 3096937 - |      | NULL                 | CGCGCGGATCGCCCTGCCCGCGCT  | 2 | 103 | 1   | 103 | 100 Bm_ATCC23344_chr2 | 2325379 | 1758739 | 1758841 | 100 | 515 | 7.70E-19 + |
| BPSS1610 | AraC-family transcriptional regulator                | 2186573 | 2188018 - | 481  | 53722633 | 3095884 - |      | NULL                 | CATCCATGCGCTGCGCCCGCGAC   | 2 | 103 | 103 | 1   | 100 Bm_ATCC23344_chr2 | 2325379 | 1761463 | 1761565 | 100 | 515 | 7.70E-19 - |
| BPSS1611 | hypothetical protein BPSS1611                        | 2188230 | 2188685 - | 151  | 53722634 | 3095885 - |      | NULL                 | GCCGCGCTGCTGCTCGGCATCGTGT | 2 | 95  | 95  | 1   | 100 Bm_ATCC23344_chr2 | 2325379 | 1762130 | 1762224 | 100 | 475 | 4.90E-17 - |
| BPSS1614 | type III secretion protein                           | 2189407 | 2190390 - | 327  | 53722637 | 3096788 - |      | NULL                 | GGCGCGATCGAGCGGGCGCATCGC  | 2 | 103 | 103 | 1   | 100 Bm_ATCC23344_chr2 | 2325379 | 1763832 | 1763934 | 99  | 506 | 2.00E-18 - |
| BPSS1621 | type III secretion protein                           | 2196386 | 2197468 - | 360  | 53722644 | 3096071 - |      | COG1377NU            | CGCTTCGCATCCGGCGCGCGCGCT  | 2 | 103 | 103 | 1   | 100 Bm_ATCC23344_chr2 | 2325379 | 1770920 | 1771022 | 99  | 506 | 2.00E-18 - |
| BPSS1622 | type III secretion protein                           | 2197704 | 2198285 - | 193  | 53722645 | 3095189 - |      | NULL                 | ATCGCGCGCGCGCGCGCGCGCGCT  | 2 | 103 | 1   | 103 | 100 Bm_ATCC23344_chr2 | 2325379 | 1771058 | 1771160 | 100 | 515 | 7.70E-19 + |
| BPSS1630 | hypothetical protein BPSS1630                        | 2204186 | 2205952 + | 588  | 53722653 | 3096210 - |      | NULL                 | CGCGGAGCGCTTGCGTGGCGCGCC  | 2 | 103 | 1   | 103 | 100 Bm_ATCC23344_chr2 | 2325379 | 1777505 | 1777607 | 100 | 515 | 7.70E-19 + |
| BPSS1631 | hypothetical protein BPSS1631                        | 2206192 | 2207145 - | 317  | 53722654 | 3095627 - |      | NULL                 | AGCAACCGGAACCGCGCGCGCGCG  | 2 | 58  | 58  | 1   | 100 Bm_ATCC23344_chr2 | 2325379 | 1780579 | 1780636 | 98  | 281 | 2.90E-08 - |
| BPSS1635 | probable class III aminotransferase                  | 2248989 | 2251772 - | 927  | 53722658 | 3097151 - |      | COG0160E             | TGCTCTCGCGTCTCGCTTTGCCGA  | 2 | 103 | 103 | 1   | 100 Bm_ATCC23344_chr2 | 2325379 | 179523  | 179523  | 99  | 506 | 2.00E-18 - |
| BPSS1639 | citrate lyase beta chain                             | 2257163 | 2258044 - | 293  | 53722662 | 3096759 - |      | COG2301G             | CCGATTGCGCGAAGCGTCGCCCGC  | 2 | 103 | 103 | 1   | 100 Bm_ATCC23344_chr2 | 2325379 | 1805699 | 1805801 | 100 | 515 | 7.70E-19 - |
| BPSS1640 | LysR-family transcriptional regulator                | 2258149 | 2259060 - | 303  | 53722663 | 3096760 - |      | COG0583K             | TCGTTCCGACGTTGTGTAAACCC   | 2 | 103 | 103 | 1   | 100 Bm_ATCC23344_chr2 | 2325379 | 1806715 | 1806817 | 100 | 515 | 7.70E-19 - |
| BPSS1643 | LysR-family transcriptional regulator                | 2259622 | 2260542 - | 306  | 53722664 | 3095831 - |      | COG0583K             | CGCGGCGACGTAGTGTAAAGTCG   | 2 | 103 | 103 | 1   | 100 Bm_ATCC23344_chr2 | 2325379 | 1808188 | 1808290 | 99  | 506 | 2.00E-18 - |
| BPSS1644 | hypothetical protein BPSS1644                        | 2260651 | 2262048 + | 465  | 53722665 | 3097123 - |      | NULL                 | CAGTTGTCAAATTTTTCGATCAGT  | 2 | 103 | 1   | 103 | 100 Bm_ATCC23344_chr2 | 2325379 | 1808208 | 1808310 | 99  | 506 | 2.00E-18 + |
| BPSS1647 | hypothetical protein BPSS1647                        | 2263768 | 2264946 - | 392  | 53722668 | 3096241 - |      | COG3287S             | TACATCAGCGCGCGCGACGCGGAA  | 2 | 75  | 75  | 1   | 100 Bm_ATCC23344_chr2 | 2325379 | 1812601 | 1812675 | 100 | 375 | 1.60E-12 - |
| BPSS1648 | probable two-component response regulator            | 2265019 | 2266446 - | 476  | 53722669 | 3096242 - |      | COG3437KT            | ATTTCATGTTTTTCGCGTTTCCCA  | 2 | 103 | 103 | 1   | 100 Bm_ATCC23344_chr2 | 2325379 | 1814101 | 1814202 | 99  | 500 | 3.70E-18 - |
| BPSS1649 | sugar-binding protein                                | 2266833 | 2269253 + | 805  | 53722670 | 3094967 - |      | NULL                 | CGCGGCGCTGTCGCGGTTGCTATT  | 2 | 103 | 1   | 103 | 100 Bm_ATCC23344_chr2 | 2325379 | 1814389 | 1814491 | 99  | 506 | 2.00E-18 + |
| BPSS1653 | hypothetical protein BPSS1653                        | 2272044 | 2272613 - | 189  | 53722674 | 3094548 - |      | NULL                 | CTGTAGCGTGAGGCTCGTGGCCCC  | 2 | 70  | 70  | 1   | 100 Bm_ATCC23344_chr2 | 2325379 | 1820285 | 1820354 | 97  | 332 | 1.40E-10 - |
| BPSS1654 | cytochrome P450                                      | 2272681 | 2275035 - | 784  | 53722675 | 3094930 - |      | COG1018C, COG2124Q   | GCGGATGACAGTTAAACGCGATAT  | 2 | 103 | 103 | 1   | 100 Bm_ATCC23344_chr2 | 2325379 | 1822707 | 1822809 | 100 | 515 | 7.70E-19 - |
| BPSS1656 | hypothetical protein BPSS1656                        | 2275525 | 2276781 + | 418  | 53722677 | 3095556 - |      | NULL                 | CGCTGCGCGATGGCGCGCGCATK   | 2 | 74  | 1   | 74  | 100 Bm_ATCC23344_chr2 | 2325379 | 1823129 | 1823202 | 100 | 370 | 2.70E-12 + |
| BPSS1657 | beta-glucosidase                                     | 2277526 | 2279721 + | 731  | 53722678 | 3097236   | bgIB | NULL                 | ATCCGTCACACGCTTGACGGCGCC  | 2 | 103 | 1   | 103 | 100 Bm_ATCC23344_chr2 | 2325379 | 1825095 | 1825197 | 100 | 515 | 7.70E-19 + |
| BPSS1658 | hypothetical protein BPSS1658                        | 2280113 | 2280697 + | 194  | 53722679 | 3096980 - |      | COG0583K             | CTCGAGCATGGCGCGCTCGCGCC   | 2 | 103 | 1   | 103 | 100 Bm_ATCC23344_chr2 | 2325379 | 1827775 | 1827877 | 99  | 506 | 2.00E-18 + |
| BPSS1659 | hypothetical protein BPSS1659                        | 2280838 | 2281125 + | 95   | 53722680 | 3096460 - |      | NULL                 | ATCCGGCGGATGGCGCGCATCGAG  | 2 | 103 | 1   | 103 | 100 Bm_ATCC23344_chr2 | 2325379 | 1828407 | 1828509 | 100 | 515 | 7.70E-19 + |
| BPSS1667 | formate dehydrogenase-O <sub>2</sub> major subunit   | 2288604 | 2291675 - | 1022 | 53722688 | 3094982   | fdoG | COG0243C             | CGCGCGCGCGGAGCGCGCGCGCC   | 2 | 103 | 103 | 1   | 100 Bm_ATCC23344_chr2 | 2325379 | 1839342 | 1839444 | 100 | 515 | 7.70E-19 - |
| BPSS1669 | hypothetical protein BPSS1669                        | 2292615 | 2293382 - | 256  | 53722689 | 3095163 - |      | COG1434S             | TTTTCTCAGCAGCGCGGACGACAG  | 2 | 103 | 103 | 1   | 100 Bm_ATCC23344_chr2 | 2325379 | 1841050 | 1841152 | 100 | 515 | 7.70E-19 - |
| BPSS1671 | ABC transport system, ATP-binding protein            | 2295168 | 2297078 - | 635  | 53722691 | 3096511 - |      | COG1126E             | CGCGCGCTGCGCGCGCGGCGCGC   | 2 | 103 | 103 | 1   | 100 Bm_ATCC23344_chr2 | 2325379 | 1844666 | 1844768 | 99  | 506 | 2.00E-18 - |
| BPSS1672 | monooxygenase                                        | 2297194 | 2298516 - | 440  | 53722692 | 3095043 - |      | COG2141C             | CGCGCGGAGCGCGCGCGCGCATCC  | 2 | 58  | 58  | 1   | 100 Bm_ATCC23344_chr2 | 2325379 | 1846104 | 1846161 | 100 | 290 | 1.10E-08 - |
| BPSS1673 | hypothetical protein BPSS1673                        | 2298572 | 2299573 - | 333  | 53722693 | 3095044 - |      | COG2141C             | CGCGCGGAGCGCGCGCGCGCGG    | 2 | 103 | 103 | 1   | 100 Bm_ATCC23344_chr2 | 2325379 | 1847161 | 1847263 | 100 | 515 | 7.70E-19 - |
| BPSS1674 | hypothetical protein BPSS1674                        | 2299893 | 2300846 - | 317  | 53722694 | 3096057 - |      | COG0834ET            | CGGCGCGCGCTCTCGCGCGCGCG   | 2 | 88  | 88  | 1   | 100 Bm_ATCC23344_chr2 | 2325379 | 1848417 | 1848504 | 98  | 431 | 4.80E-15 - |
| BPSS1676 | hypothetical protein BPSS1676                        | 2302418 | 2303440 - | 340  | 53722696 | 3097038 - |      | COG3608R             | CGCGCGCGCGCGCTCGCGCTCGAG  | 2 | 103 | 103 | 1   | 100 Bm_ATCC23344_chr2 | 2325379 | 1851110 | 1851212 | 98  | 497 | 5.00E-18 - |
| BPSS1678 | ribonuclease                                         | 2304652 | 2305575 + | 307  | 53722698 | 3096670 - |      | COG1295S             | CCCGTCTCGCTGGGAATGGAATAAP | 2 | 103 | 1   | 103 | 100 Bm_ATCC23344_chr2 | 2325379 | 1852186 | 1852288 | 100 | 515 | 7.70E-19 + |
| BPSS1679 | porin related exported protein                       | 2306033 | 2307187 + | 384  | 53722699 | 3096671 - |      | COG3203M             | TTTGAGACACTTATTTTTTGGATT  | 2 | 103 | 1   | 103 | 100 Bm_ATCC23344_chr2 | 2325379 | 1853567 | 1853669 | 100 | 515 | 7.70E-19 - |
| BPSS1680 | histone-like protein                                 | 2309027 | 2309449 - | 140  | 53722700 | 3096774 - |      | NULL                 | CGCGGCTGTAGAAATCCGCGGCTG  | 2 | 103 | 103 | 1   | 100 Bm_ATCC23344_chr2 | 2325379 | 1857019 | 1857121 | 100 | 515 | 7.70E-19 - |
| BPSS1681 | hypothetical protein BPSS1681                        | 2309745 | 2310872 + | 375  | 53722701 | 3096587 - |      | COG1835I             | CGCAGGGTTTTTGGCTCGGTATCG  | 2 | 103 | 1   | 103 | 100 Bm_ATCC23344_chr2 | 2325379 | 1857217 | 1857319 | 100 | 515 | 7.70E-19 - |
| BPSS1682 | UTP-glucose-1-phosphate uridylyltransferase          | 2311424 | 2312311 - | 295  | 53722702 | 3095010   | gtab | COG1210M             | CGCAAGTCGATGCGCGCGCTGCG   | 2 | 103 | 103 | 1   | 100 Bm_ATCC23344_chr2 | 2325379 | 1859860 | 1859962 | 100 | 515 | 7.70E-19 - |
| BPSS1683 | lipopolysaccharide biosynthesis-related membrane p   | 2312964 | 2314121 + | 385  | 53722703 | 3096588 - |      | COG1835I             | TTTTTTATCTCCCGCGCTATTCTCT | 2 | 103 | 1   | 103 | 100 Bm_ATCC23344_chr2 | 2325379 | 1860415 | 1860517 | 100 | 515 | 7.70E-19 + |
| BPSS1684 | lipopolysaccharide biosynthesis-related glycosyltran | 2314235 | 2316697 - | 820  | 53722704 | 3096455 - |      | COG0438M             | CTCCAGCTTTTCAGGACGTGACGCG | 2 | 103 | 103 | 1   | 100 Bm_ATCC23344_chr2 | 2325379 | 1864109 | 1864211 | 99  | 506 | 2.00E-18 - |
| BPSS1687 | hypothetical protein BPSS1687                        | 2320944 | 2322002 + | 352  | 53722707 | 3096186 - |      | COG1835I             | TTTCATTTATTCAGCGCGCGCAGC  | 2 | 103 | 1   | 103 | 100 Bm_ATCC23344_chr2 | 2325379 | 1868242 | 1868344 | 100 | 515 | 7.70E-19 + |
| BPSS1691 | O-succinylhomoserine sulphydrylase                   | 2324782 | 2325999 - | 405  | 53722711 | 3095378   | metZ | COG0626E             | GTGCATAGCTGTTCTGATCCGCGAC | 2 | 103 | 103 | 1   | 100 Bm_ATCC23344_chr2 | 2325379 | 1873309 | 1873411 | 100 | 515 | 7.70E-19 - |
| BPSS1692 | amidophosphoribosyltransferase                       | 2326228 | 2327763 - | 511  | 53722712 | 3095844   | purF | COG0034F             | TCCGCGCGGAGCGGACGACCGAAC  | 2 | 55  | 55  | 1   | 100 Bm_ATCC23344_chr2 | 2325379 | 1875073 | 1875127 | 100 | 275 | 5.30E-08 - |
| BPSS1694 | hypothetical protein BPSS1694                        | 2328317 | 2329057 - | 246  | 53722714 | 3095486 - |      | NULL                 | CGGGTAGCTTCGGGTTCAAGCATA  | 2 | 103 | 103 | 1   | 100 Bm_ATCC23344_chr2 | 2325379 | 1876367 | 1876469 | 99  | 506 | 2.00E-18 - |
| BPSS1695 | folypolyglutamate synthase/dihydrofolate synthase    | 2329162 | 2330475 - | 437  | 53722715 | 3095339   | folC | COG0285H             | ATGATCGACGCTCGCGCGCTCGCT  | 2 | 103 | 103 | 1   | 100 Bm_ATCC23344_chr2 | 2325379 | 1877785 | 1877887 | 100 | 515 | 7.70E-19 - |
| BPSS1696 | acetyl-CoA carboxylase beta subunit                  | 2330587 | 2331459 - | 290  | 53722716 | 3095672   | accD | COG0777I             | CGCGCGCGGACAGCTCAACACAAG  | 2 | 82  | 82  | 1   | 100 Bm_ATCC23344_chr2 | 2325379 | 1878769 | 1878850 | 100 | 410 | 4.30E-14 - |
| BPSS1699 | tryptophan synthase subunit beta                     | 2332526 | 2334449 - | 397  | 53722719 | 3096325   | trpB | COG0133E             | TGCCAGCTCGCGCGCGCGCGCGCC  | 2 | 74  | 74  | 1   | 100 Bm_ATCC23344_chr2 | 2325379 | 1881759 | 1881832 | 100 |     |            |

|          |                                                   |         |           |     |          |               |           |                            |   |     |     |     |                       |         |        |        |     |     |            |
|----------|---------------------------------------------------|---------|-----------|-----|----------|---------------|-----------|----------------------------|---|-----|-----|-----|-----------------------|---------|--------|--------|-----|-----|------------|
| BPSS1741 | Lipase precursor                                  | 2390190 | 2391284 - | 364 | 53722762 | 3095030 lipA1 | COG1075R  | GGGTGGCGTGCATGCGCGGTGTG    | 2 | 103 | 1   | 103 | 100 Bm_ATCC23344_chr2 | 2325379 | 423922 | 424024 | 99  | 506 | 2.00E-18 + |
| BPSS1742 | outer membrane copper receptor                    | 2391608 | 2393857 - | 749 | 53722763 | 3097071 -     | COG1629P  | CCACGCGCGCGCGCGCGCGCGCG    | 2 | 103 | 1   | 103 | 100 Bm_ATCC23344_chr2 | 2325379 | 421505 | 421607 | 100 | 515 | 7.70E-19 + |
| BPSS1743 | hypothetical protein BPSS1743                     | 2393945 | 2394340 - | 131 | 53722764 | 3097168 -     | NULL      | GGCGGCAACCGCGCGCGCGGAC     | 2 | 103 | 1   | 103 | 100 Bm_ATCC23344_chr2 | 2325379 | 420878 | 420980 | 100 | 515 | 7.70E-19 + |
| BPSS1744 | cytochrome b561                                   | 2394501 | 2395037 - | 178 | 53722765 | 3097263 -     | COG3038C  | GCCACGGGGCCCCGCCATCGCGCG   | 2 | 103 | 1   | 103 | 100 Bm_ATCC23344_chr2 | 2325379 | 420181 | 420283 | 100 | 515 | 7.70E-19 + |
| BPSS1745 | hypothetical protein BPSS1745                     | 2395306 | 2395941 + | 211 | 53722766 | 3097264 -     | NULL      | TCGGCTCGGGCATGCTTGAACTATT  | 2 | 103 | 103 | 1   | 100 Bm_ATCC23344_chr2 | 2325379 | 420010 | 420112 | 100 | 515 | 7.70E-19 + |
| BPSS1746 | lipoprotein                                       | 2396072 | 2396836 - | 254 | 53722767 | 3097222 -     | COG0739M  | TGACGCAAGCGCAATCGGTGCGG    | 2 | 103 | 1   | 103 | 100 Bm_ATCC23344_chr2 | 2325379 | 418382 | 418484 | 100 | 515 | 7.70E-19 + |
| BPSS1747 | hypothetical protein BPSS1747                     | 2397116 | 2397433 - | 105 | 53722768 | 3095783 -     | COG0662G  | CGCGATCCCCGGCAACTACGTTGC   | 2 | 103 | 1   | 103 | 100 Bm_ATCC23344_chr2 | 2325379 | 417786 | 417888 | 100 | 515 | 7.70E-19 + |
| BPSS1748 | hypothetical protein BPSS1748                     | 2397872 | 2398204 - | 110 | 53722769 | 3095784 -     | NULL      | TTTTCGTTGATACATGTTTTCCTTA  | 2 | 103 | 1   | 103 | 100 Bm_ATCC23344_chr2 | 2325379 | 417009 | 417111 | 99  | 506 | 2.00E-18 + |
| BPSS1749 | 6-phosphogluconate dehydrogenase                  | 2398403 | 2399818 - | 471 | 53722770 | 3097024 gnd   | COG0362G  | CGTCTTCATTGCGGGCGCGCTCGC   | 2 | 103 | 1   | 103 | 100 Bm_ATCC23344_chr2 | 2325379 | 415401 | 415503 | 100 | 515 | 7.70E-19 + |
| BPSS1752 | transport-related, membrane protein               | 2401848 | 2403272 - | 474 | 53722773 | 3096049 -     | COG1457F  | GGATGTCGGTACAACCCGCAATCC   | 2 | 103 | 1   | 103 | 100 Bm_ATCC23344_chr2 | 2325379 | 411946 | 412048 | 100 | 515 | 7.70E-19 + |
| BPSS1753 | hypothetical protein BPSS1753                     | 2403909 | 2404769 + | 286 | 53722774 | 3096059 -     | NULL      | ACATTGGGGAACAGATTTATTTCTCG | 2 | 103 | 103 | 1   | 100 Bm_ATCC23344_chr2 | 2325379 | 411407 | 411509 | 100 | 515 | 7.70E-19 + |
| BPSS1755 | RNA polymerase sigma factor                       | 2406884 | 2408926 - | 680 | 53722776 | 3096687 -     | COG0568K  | GGCTGCCGCGCGCGACGAACGGC    | 2 | 103 | 1   | 103 | 100 Bm_ATCC23344_chr2 | 2325379 | 327025 | 327127 | 100 | 515 | 7.70E-19 + |
| BPSS1756 | DNA primase                                       | 2409370 | 2411244 - | 624 | 53722777 | 3096768 dnaG  | COG0358L  | CTTCCCGCGCGCACGGCGCGCGAG   | 2 | 96  | 1   | 96  | 100 Bm_ATCC23344_chr2 | 2325379 | 324713 | 324809 | 98  | 470 | 8.30E-17 + |
| BPSS1757 | hypothetical protein BPSS1757                     | 2411338 | 2411784 - | 148 | 53722778 | 3096576 -     | COG1610S  | GCCGAATCTGAGCAAAACCGCTGTG  | 2 | 103 | 1   | 103 | 100 Bm_ATCC23344_chr2 | 2325379 | 324166 | 324268 | 100 | 515 | 7.70E-19 + |
| BPSS1758 | 30S ribosomal protein S21                         | 2411951 | 2412163 - | 70  | 53722779 | 3095644 rpsU  | COG0828J  | TGCGTTTGTGCAAAAGCTCGTCAAT  | 2 | 82  | 1   | 82  | 100 Bm_ATCC23344_chr2 | 2325379 | 323808 | 323889 | 100 | 410 | 4.30E-14 + |
| BPSS1759 | hypothetical protein BPSS1759                     | 2412243 | 2413466 - | 407 | 53722780 | 3095896 -     | COG2081R  | ACGGCGCGAAATCAACGTAAACAG   | 2 | 103 | 1   | 103 | 100 Bm_ATCC23344_chr2 | 2325379 | 322484 | 322586 | 99  | 506 | 2.00E-18 + |
| BPSS1760 | O-sialoglycoprotein endopeptidase                 | 2413606 | 2414646 + | 346 | 53722781 | 3095723 gcp   | COG05330  | CGCGCGGCTGGCGAAGCGGCGCGC   | 2 | 103 | 103 | 1   | 100 Bm_ATCC23344_chr2 | 2325379 | 322442 | 322544 | 100 | 515 | 7.70E-19 + |
| BPSS1761 | hypothetical protein BPSS1761                     | 2415068 | 2415877 - | 269 | 53722782 | 3095897 -     | COG1469S  | TCGCCGGAAGATGCGGCTCGCGG    | 2 | 103 | 1   | 103 | 100 Bm_ATCC23344_chr2 | 2325379 | 318508 | 318610 | 100 | 515 | 7.70E-19 + |
| BPSS1762 | 1-deoxy-D-xylulose-5-phosphate synthase           | 2416028 | 2417932 - | 634 | 53722783 | 3096803 dks   | COG1154HI | CGCGAAGCCGCGCGCGCGGCCCA    | 2 | 86  | 1   | 86  | 100 Bm_ATCC23344_chr2 | 2325379 | 316470 | 316555 | 100 | 430 | 5.30E-15 + |
| BPSS1764 | exodeoxyribonuclease VII small subunit            | 2418897 | 2419190 - | 97  | 53722785 | 3096525 xseB  | COG1722L  | GGCGCGCGCGCGCGCAAGCCCGCG   | 2 | 103 | 1   | 103 | 100 Bm_ATCC23344_chr2 | 2325379 | 315195 | 315297 | 100 | 515 | 7.70E-19 + |
| BPSS1765 | osmotic adaptation-related protein                | 2419460 | 2420566 + | 368 | 53722786 | 3096723 -     | COG4638PR | TACCCACCCCAAGAATGTCGATCC   | 2 | 103 | 103 | 1   | 100 Bm_ATCC23344_chr2 | 2325379 | 315029 | 315131 | 100 | 515 | 7.70E-19 + |
| BPSS1767 | carboxymethylglutaminolase                        | 2421642 | 2422517 - | 291 | 53722788 | 3096763 -     | COG0412Q  | CGCGCGGCGCGACTGATCGCGCGC   | 2 | 103 | 4   | 103 | 97 Bm_ATCC23344_chr2  | 2325379 | 311871 | 311970 | 100 | 500 | 3.70E-18 + |
| BPSS1768 | hypothetical protein BPSS1768                     | 2423237 | 2425030 + | 597 | 53722789 | 3096026 -     | COG4655S  | CGGATGCGCGCGGAGCAGCCACAC   | 2 | 103 | 103 | 1   | 100 Bm_ATCC23344_chr2 | 2325379 | 311252 | 311355 | 99  | 505 | 2.20E-18 + |
| BPSS1769 | NADH dehydrogenase                                | 2425270 | 2426652 - | 460 | 53722790 | 3097258 ndh   | COG1252C  | CGCCCAAAGTCTCGCAACTGTTTAC  | 2 | 103 | 2   | 103 | 99 Bm_ATCC23344_chr2  | 2325379 | 307611 | 307712 | 100 | 510 | 1.30E-18 + |
| BPSS1772 | hypothetical protein BPSS1772                     | 2430911 | 2431195 + | 94  | 53722793 | 3096491 -     | NULL      | CTTCCTGCAGCTACGGTGGGAAAC   | 2 | 103 | 103 | 1   | 100 Bm_ATCC23344_chr2 | 2325379 | 303440 | 303542 | 99  | 506 | 2.00E-18 + |
| BPSS1777 | AMP nucleosidase                                  | 2436429 | 2437955 - | 508 | 53722796 | 3095963 amn   | COG0775F  | CGTTCTGACGATCGCGGACGGCGCC  | 2 | 103 | 1   | 103 | 100 Bm_ATCC23344_chr2 | 2325379 | 296286 | 296388 | 100 | 515 | 7.70E-19 + |
| BPSS1778 | hypothetical protein BPSS1778                     | 2438111 | 2438509 + | 132 | 53722797 | 3096631 -     | NULL      | CGATGCCCATCGCGCGCGCAAGCG   | 2 | 103 | 103 | 1   | 100 Bm_ATCC23344_chr2 | 2325379 | 296228 | 296330 | 100 | 515 | 7.70E-19 + |
| BPSS1779 | homoserine kinase                                 | 2438603 | 2439598 + | 331 | 53722798 | 3096847 thrB  | COG2334R  | CGCACCGCGCGCGCGCGGCGGCG    | 2 | 96  | 96  | 1   | 100 Bm_ATCC23344_chr2 | 2325379 | 295736 | 295831 | 100 | 480 | 2.90E-17 - |
| BPSS1781 | MarR-family regulatory protein                    | 2440904 | 2441356 + | 150 | 53722800 | 3096256 -     | COG1846K  | GCCCTTTTCCGGCGGACGCTCGTGG  | 2 | 103 | 103 | 1   | 100 Bm_ATCC23344_chr2 | 2325379 | 293435 | 293537 | 100 | 515 | 7.70E-19 + |
| BPSS1782 | organic hydroperoxide resistance protein          | 2441494 | 2441913 + | 59  | 53722801 | 3097161 ohr   | COG1764O  | AATTAATTTGCACGCTAATGATTAG  | 2 | 103 | 103 | 1   | 100 Bm_ATCC23344_chr2 | 2325379 | 292845 | 292947 | 98  | 497 | 5.00E-18 + |
| BPSS1783 | hypothetical protein BPSS1783                     | 2442026 | 2442184 - | 132 | 53722802 | 3096257 -     | NULL      | GACGCGCGGCTCGGGAACGGCTGG   | 2 | 99  | 1   | 99  | 100 Bm_ATCC23344_chr2 | 2325379 | 292061 | 292159 | 100 | 495 | 6.20E-18 + |
| BPSS1784 | depolymerase                                      | 2442281 | 2443327 - | 348 | 53722803 | 3096172 -     | COG3509Q  | GACCAAAAGTCTGACGAAATTTCTGC | 2 | 103 | 1   | 103 | 100 Bm_ATCC23344_chr2 | 2325379 | 290914 | 291016 | 100 | 515 | 7.70E-19 + |
| BPSS1785 | hypothetical protein BPSS1785                     | 2443689 | 2444378 + | 229 | 53722804 | 3096771 -     | NULL      | TCGTCGGCTCGGCTGTCTCTGTTGT  | 2 | 103 | 103 | 1   | 100 Bm_ATCC23344_chr2 | 2325379 | 290650 | 290752 | 99  | 506 | 2.00E-18 + |
| BPSS1786 | molybdenum transport-related, exported protein    | 2444947 | 2445747 + | 266 | 53722805 | 3096772 -     | COG0725P  | CTGCGGCGTCAAGACACCCGCGCA   | 2 | 103 | 103 | 1   | 100 Bm_ATCC23344_chr2 | 2325379 | 289521 | 289623 | 100 | 515 | 7.70E-19 + |
| BPSS1787 | molybdenum transport protein                      | 2447680 | 2448468 - | 262 | 53722808 | 3096486 modE  | COG2005R  | CTATAATGGCTCTCCGCTCGGTGTC  | 2 | 97  | 1   | 97  | 100 Bm_ATCC23344_chr2 | 2325379 | 285907 | 286003 | 100 | 485 | 1.70E-17 + |
| BPSS1790 | hypothetical protein BPSS1790                     | 2448563 | 2450626 - | 128 | 53722809 | 3096899 -     | COG5607S  | AACTCGGCGCATTCGGGCTGTGCTG  | 2 | 65  | 1   | 65  | 100 Bm_ATCC23344_chr2 | 2325379 | 283787 | 283851 | 100 | 325 | 2.90E-10 + |
| BPSS1791 | hypothetical protein BPSS1791                     | 2450683 | 2451060 - | 675 | 53722810 | 3095357 -     | NULL      | TTCAAAATGGAAATGGATGAATATT  | 2 | 100 | 1   | 100 | 100 Bm_ATCC23344_chr2 | 2325379 | 283306 | 283405 | 98  | 482 | 2.40E-17 + |
| BPSS1792 | LysR-family transcriptional regulator             | 2451164 | 2452039 + | 291 | 53722811 | 3096139 -     | COG0583K  | CGGGTTTCTCTTGACGGTGGGAC    | 2 | 100 | 100 | 1   | 100 Bm_ATCC23344_chr2 | 2325379 | 283303 | 283402 | 98  | 482 | 2.40E-17 + |
| BPSS1793 | hypothetical protein BPSS1793                     | 2452106 | 2453026 + | 306 | 53722812 | 3096140 -     | NULL      | ACTGTGAGGTTTGGTGTGGCGGAC   | 2 | 69  | 69  | 1   | 100 Bm_ATCC23344_chr2 | 2325379 | 282361 | 282429 | 98  | 336 | 9.40E-11 - |
| BPSS1795 | hypothetical protein BPSS1795                     | 2453984 | 2455324 + | 446 | 53722814 | 3097205 -     | COG1253R  | TGCGCGCGGCTCGGCGGCGGCGTC   | 2 | 88  | 88  | 1   | 100 Bm_ATCC23344_chr2 | 2325379 | 280483 | 280570 | 100 | 440 | 1.90E-15 - |
| BPSS1797 | trehalose trehalohydrolase                        | 2456109 | 2457752 - | 547 | 53722816 | 3096087 -     | COG0296G  | GGCGCATATGGGTGCGCCTTCTCTC  | 2 | 103 | 1   | 103 | 100 Bm_ATCC23344_chr2 | 2325379 | 276617 | 276719 | 100 | 515 | 7.70E-19 + |
| BPSS1799 | hypothetical protein BPSS1799                     | 2459079 | 2459534 + | 151 | 53722818 | 3095968 -     | COG2606S  | AGGGTTACCAAGATGCGGAGCGGC   | 2 | 103 | 103 | 1   | 100 Bm_ATCC23344_chr2 | 2325379 | 275430 | 275532 | 100 | 515 | 7.70E-19 + |
| BPSS1800 | dehydrogenase                                     | 2459599 | 2460837 - | 412 | 53722819 | 3095089 -     | COG1304C  | ATCGGCGTGGCGCGGCTGTGAGCGC  | 2 | 103 | 1   | 103 | 100 Bm_ATCC23344_chr2 | 2325379 | 273574 | 273676 | 99  | 506 | 2.00E-18 + |
| BPSS1801 | hypothetical transposon protein                   | 2461063 | 2461500 + | 145 | 53722820 | 3095615 -     | COG3415L  | TCAGACAGATTTCACCTCGCACTG   | 2 | 103 | 103 | 1   | 100 Bm_ATCC23344_chr2 | 2325379 | 273446 | 273548 | 99  | 506 | 2.00E-18 + |
| BPSS1802 | hypothetical protein BPSS1802                     | 2461742 | 2462368 - | 208 | 53722821 | 3095616 -     | COG1280E  | GACAGCTTCCCTGACGCTTCCATAA  | 2 | 65  | 1   | 65  | 100 Bm_ATCC23344_chr2 | 2325379 | 272081 | 272145 | 100 | 325 | 2.90E-10 + |
| BPSS1803 | AraC-family transcriptional regulator             | 2462431 | 2463285 + | 284 | 53722822 | 3095107 -     | NULL      | CCAAGCTCAGCGCGCCATCTTTTT   | 2 | 65  | 65  | 1   | 100 Bm_ATCC23344_chr2 | 2325379 | 272078 | 272142 | 100 | 325 | 2.90E-10 + |
| BPSS1836 | hypothetical protein BPSS1836                     | 2497575 | 2498579 - | 334 | 53722855 | 3095240 -     | COG3293L  | ACCGAATAGCTGCTGTGCAACCT    | 2 | 103 | 1   | 103 | 100 Bm_ATCC23344_chr2 | 2325379 | 264210 | 264312 | 100 | 515 | 7.70E-19 + |
| BPSS1839 | oxidative stress related rubrerythrin protein     | 2501208 | 2501630 - | 140 | 53722858 | 3096815 -     | COG1592C  | GCACGGTGGCGCGGCGGCGGAG     | 2 | 103 | 1   | 103 | 100 Bm_ATCC23344_chr2 | 2325379 | 261155 | 261257 | 100 | 515 | 7.70E-19 + |
| BPSS1840 | N-acetylmuramoyl-L-alanine amidase                | 2501901 | 2502935 - | 344 | 53722859 | 3096352 -     | COG3023V  | CGCGACTCCCAAGCTCGCGGCTGCG  | 2 | 103 | 1   | 103 | 100 Bm_ATCC23344_chr2 | 2325379 | 259844 | 259946 | 100 | 515 | 7.70E-19 + |
| BPSS1843 | hypothetical protein BPSS1843                     | 2505333 | 2505746 - | 137 | 53722862 | 3095289 -     | NULL      | CTCTAATTTTTCGCGTGGCTGTGCG  | 2 | 103 | 1   | 103 | 100 Bm_ATCC23344_chr2 | 2325379 | 257059 | 257162 | 99  | 505 | 2.20E-18 + |
| BPSS1844 | hypothetical protein BPSS1844                     | 2505912 | 2506265 - | 117 | 53722863 | 3095290 -     | NULL      | GCAGCCCGCTCAAAATAGAGCCGC   | 2 | 103 | 1   | 103 | 100 Bm_ATCC23344_chr2 | 2325379 | 256540 | 256642 | 99  | 506 | 2.00E-18 + |
| BPSS1845 | endonuclease/exonuclease/phosphatase family prote | 2506642 | 2508516 + | 624 | 53722864 | 3095094 -     | COG2374R  | CCAAACCTGGCCAGATATACATATT  | 2 | 103 | 103 | 1   | 100 Bm_ATCC23344_chr2 | 2325379 | 256277 | 256379 | 100 | 515 | 7.70E-19 + |
| BPSS1846 | hypothetical protein BPSS1846                     | 2509305 | 2509685 + | 126 | 53722865 | 3095095 -     | COG4575S  | CGCGGCTTGGCGCGCGCGCGCGCG   | 2 | 103 | 103 | 1   | 100 Bm_ATCC23344_chr2 | 2325379 | 253625 | 253727 | 100 | 515 | 7.70E-19 + |
| BPSS1848 | hypothetical protein BPSS1848                     | 2510510 | 2511604 + | 364 | 53722867 | 3094990 -     | COG0628R  | CAGCCGCAACGACATCGGCTCGGG   | 2 | 103 | 103 | 1   | 100 Bm_ATCC23344_chr2 | 2325379 | 252420 | 252522 | 100 | 515 | 7.70E-19 + |
| BPSS1849 | hypothetical protein BPSS1849                     |         |           |     |          |               |           |                            |   |     |     |     |                       |         |        |        |     |     |            |

|          |                                                  |         |           |     |          |              |                    |                            |   |     |     |     |                       |         |        |        |     |     |            |
|----------|--------------------------------------------------|---------|-----------|-----|----------|--------------|--------------------|----------------------------|---|-----|-----|-----|-----------------------|---------|--------|--------|-----|-----|------------|
| BPSS1884 | hypothetical protein BPSS1884                    | 2560561 | 2560977 - | 138 | 53722905 | 3097008 -    | COG0537FR          | GCGCGGCTTCTGTCGCCGTATCGCT  | 2 | 103 | 1   | 103 | 100 Bm_ATCC23344_chr2 | 2325379 | 201857 | 201959 | 99  | 506 | 2.00E-18 + |
| BPSS1888 | aromatic oxygenase                               | 2563271 | 2564527 - | 418 | 53722909 | 3094897 -    | COG4638PR          | CGCGATTGTTCAGCGGCTCAACCG   | 2 | 103 | 1   | 103 | 100 Bm_ATCC23344_chr2 | 2325379 | 198308 | 198410 | 100 | 515 | 7.70E-19 + |
| BPSS1889 | AraC-family transcriptional regulator            | 2564727 | 2565767 + | 346 | 53722910 | 3097234 -    | NULL               | CCTAGACAGACCGATTTTGTAAACG  | 2 | 103 | 103 | 1   | 100 Bm_ATCC23344_chr2 | 2325379 | 198206 | 198308 | 100 | 515 | 7.70E-19 - |
| BPSS1890 | cat operon LysR-family transcriptional activator | 2565817 | 2566704 - | 295 | 53722911 | 3096978 -    | COG0583K           | CGGAACCTCTCTGTGCACACATGC   | 2 | 92  | 1   | 92  | 100 Bm_ATCC23344_chr2 | 2325379 | 196142 | 196233 | 100 | 460 | 2.30E-16 + |
| BPSS1891 | ubiquonate cycloisomerase I                      | 2566794 | 2567927 + | 377 | 53722912 | 3096549 catB | COG4948MR          | GCATACCTCGAAGATGTGAAGAGT   | 2 | 92  | 92  | 1   | 100 Bm_ATCC23344_chr2 | 2325379 | 196139 | 196230 | 100 | 460 | 2.30E-16 - |
| BPSS1897 | ubiquinol oxidase polypeptide II precursor       | 2572268 | 2573155 - | 295 | 53722918 | 3096608 cyoA | COG1622C           | GGATTTTCATCTCGTTCGCCGGGATC | 2 | 103 | 1   | 103 | 100 Bm_ATCC23344_chr2 | 2325379 | 189686 | 189788 | 100 | 515 | 7.70E-19 + |
| BPSS1898 | 2,4-dienoyl-CoA reductase (NADPH)                | 2573880 | 2575913 - | 677 | 53722919 | 3094934 fadH | COG0446R, COG1902C | AATGACAACGATTATGCGTATTTCG  | 2 | 103 | 1   | 103 | 100 Bm_ATCC23344_chr2 | 2325379 | 186928 | 187030 | 100 | 515 | 7.70E-19 - |
| BPSS1899 | AraC-family regulatory protein                   | 2576063 | 2577115 + | 350 | 53722920 | 3096979 -    | NULL               | CGCGCGCACCGCTTCTGCGTGAGG   | 2 | 103 | 103 | 1   | 100 Bm_ATCC23344_chr2 | 2325379 | 186876 | 186978 | 100 | 515 | 7.70E-19 - |
| BPSS1900 | LysR-family transcriptional regulator            | 2577069 | 2578016 - | 315 | 53722921 | 3096563 -    | COG0583K           | CGCCTGCTCCGGAAGCTGATCGAC   | 2 | 97  | 1   | 97  | 100 Bm_ATCC23344_chr2 | 2325379 | 184831 | 184927 | 98  | 476 | 4.40E-17 + |
| BPSS1901 | hypothetical protein BPSS1901                    | 2578111 | 2579112 + | 335 | 53722922 | 3096564 -    | COG0451MG          | ACGAAAATGTATAGCCACCAACG    | 2 | 97  | 97  | 1   | 100 Bm_ATCC23344_chr2 | 2325379 | 184828 | 184924 | 98  | 476 | 4.40E-17 - |
| BPSS1902 | LysR-family transcriptional regulator            | 2579291 | 2580205 - | 304 | 53722923 | 3096458 -    | COG0583K           | TAGTGTCTGACGACAGCGCGGTCA   | 2 | 103 | 1   | 103 | 100 Bm_ATCC23344_chr2 | 2325379 | 182640 | 182742 | 100 | 515 | 7.70E-19 + |
| BPSS1903 | benzoate 1,2-dioxygenase alpha subunit           | 2580429 | 2581796 + | 455 | 53722924 | 3096099 benA | COG4638PR          | ACCCGGGGTTTCCCATCGGACCGCA  | 2 | 103 | 103 | 1   | 100 Bm_ATCC23344_chr2 | 2325379 | 182514 | 182616 | 100 | 515 | 7.70E-19 - |
| BPSS1907 | hypothetical protein BPSS1907                    | 2584182 | 2585090 - | 302 | 53722928 | 3095515 -    | COG0657I           | CCATGCGCGGTTTGAATCGTTGCA   | 2 | 103 | 1   | 103 | 100 Bm_ATCC23344_chr2 | 2325379 | 177785 | 177887 | 99  | 506 | 2.00E-18 + |
| BPSS1908 | MarR-family regulatory protein                   | 2585463 | 2585948 + | 161 | 53722929 | 3095516 -    | NULL               | CGCCGCGTCCGCCCTCCCCGCACTC  | 2 | 103 | 103 | 1   | 100 Bm_ATCC23344_chr2 | 2325379 | 177480 | 177582 | 100 | 515 | 7.70E-19 - |
| BPSS1913 | lysine-specific permease                         | 2591285 | 2592847 - | 520 | 53722934 | 3097029 lysP | COG0833E           | CACCGGGCGCGCGCGCGCGATCC    | 2 | 103 | 1   | 103 | 100 Bm_ATCC23344_chr2 | 2325379 | 168779 | 168881 | 100 | 515 | 7.70E-19 + |
| BPSS1914 | hypothetical protein BPSS1914                    | 2593487 | 2594377 - | 296 | 53722935 | 3096552 -    | COG3687R           | GATGTGAGATAGCGCATGCGCCGC   | 2 | 103 | 1   | 103 | 100 Bm_ATCC23344_chr2 | 2325379 | 165654 | 165756 | 100 | 515 | 7.70E-19 - |
| BPSS1915 | metallo-beta-lactamase family protein            | 2595091 | 2596470 - | 459 | 53722936 | 3096553 -    | COG1236J           | TCGCGCGCGCTTCGCGCGCGGATT   | 2 | 103 | 103 | 1   | 100 Bm_ATCC23344_chr2 | 2325379 | 165038 | 165140 | 100 | 515 | 7.70E-19 - |
| BPSS1916 | acetoacetyl-CoA reductase                        | 2597063 | 2597809 - | 248 | 53722937 | 3095326 phbB | COG1028IQ          | CAACACATTTTCAACCATGCGCCG   | 2 | 103 | 1   | 103 | 100 Bm_ATCC23344_chr2 | 2325379 | 162221 | 162323 | 99  | 506 | 2.00E-18 - |
| BPSS1917 | crp-family transcriptional regulator             | 2598474 | 2599256 + | 260 | 53722938 | 3097133 -    | COG0664T           | GCCTTGTGTCAGCGCGTCCGCGAAG  | 2 | 103 | 103 | 1   | 100 Bm_ATCC23344_chr2 | 2325379 | 161654 | 161756 | 100 | 515 | 7.70E-19 - |
| BPSS1920 | hypothetical protein BPSS1920                    | 2601413 | 2601841 + | 142 | 53722941 | 3097074 -    | NULL               | CAGGCGCGCGCAGCGGCGCACACA   | 2 | 103 | 103 | 1   | 100 Bm_ATCC23344_chr2 | 2325379 | 158694 | 158796 | 99  | 506 | 2.00E-18 - |
| BPSS1921 | hypothetical protein BPSS1921                    | 2602227 | 2602550 - | 107 | 53722942 | 3097232 -    | NULL               | ATATCAAGCGGCGCTCCGTCGAAG   | 2 | 103 | 1   | 103 | 100 Bm_ATCC23344_chr2 | 2325379 | 157459 | 157561 | 100 | 515 | 7.70E-19 + |
| BPSS1922 | hypothetical protein BPSS1922                    | 2602830 | 2603777 + | 315 | 53722943 | 3097233 -    | COG1611R           | GTCGACTCGATCCCTCGGACCGGAC  | 2 | 103 | 98  | 1   | 98 Bm_ATCC23344_chr2  | 2325379 | 157213 | 157310 | 96  | 463 | 1.70E-16 - |
| BPSS1923 | hypothetical protein BPSS1923                    | 2604114 | 2604503 + | 129 | 53722944 | 3096349 -    | NULL               | CGCGGTTCCCGCTCAAGGGCGTTTC  | 2 | 103 | 103 | 1   | 100 Bm_ATCC23344_chr2 | 2325379 | 155991 | 156093 | 100 | 515 | 7.70E-19 - |
| BPSS1924 | hypothetical protein BPSS1924                    | 2605105 | 2605755 - | 216 | 53722945 | 3096350 -    | COG2823R           | CGCGGTCCGCATCTGCGCGCGGATC  | 2 | 103 | 1   | 103 | 100 Bm_ATCC23344_chr2 | 2325379 | 154252 | 154354 | 100 | 515 | 7.70E-19 + |
| BPSS1925 | hypothetical protein BPSS1925                    | 2606114 | 2607292 - | 392 | 53722946 | 3095579 -    | NULL               | CGCGCACCGCGCGCGACGCAACCC   | 2 | 103 | 1   | 103 | 100 Bm_ATCC23344_chr2 | 2325379 | 152759 | 152861 | 99  | 506 | 2.00E-18 + |
| BPSS1926 | denrylsulfate kinase                             | 2607590 | 2608234 - | 214 | 53722947 | 3095059 -    | COG0529P           | CGCGCGCGCGCGTCACTCGCAAGG   | 2 | 103 | 1   | 103 | 100 Bm_ATCC23344_chr2 | 2325379 | 151817 | 151919 | 100 | 515 | 7.70E-19 + |
| BPSS1927 | methyl-accepting chemotaxis protein              | 2608475 | 2610166 - | 563 | 53722948 | 3095060 -    | COG0840NT          | TATCAAGGAAGCGGACGACGCCCC   | 2 | 103 | 1   | 103 | 100 Bm_ATCC23344_chr2 | 2325379 | 149876 | 149978 | 99  | 506 | 2.00E-18 + |
| BPSS1928 | hypothetical protein BPSS1928                    | 2611158 | 2611997 + | 279 | 53722949 | 3097076 -    | NULL               | GGCGCATGCTAGTGTACATCATGTT  | 2 | 103 | 103 | 1   | 100 Bm_ATCC23344_chr2 | 2325379 | 149083 | 149186 | 99  | 505 | 2.20E-18 - |
| BPSS1934 | universal stress protein                         | 2616694 | 2617164 - | 156 | 53722955 | 3096674 -    | COG0589T           | CGGCAAGCGAATCCGTCGCGCGAA   | 2 | 103 | 1   | 103 | 100 Bm_ATCC23344_chr2 | 2325379 | 142893 | 142995 | 100 | 515 | 7.70E-19 + |
| BPSS1935 | TetR-family transcriptional regulator            | 2617380 | 2618246 - | 288 | 53722956 | 3096675 -    | NULL               | CATGCCCGATGCGGGTGCGCCGCC   | 2 | 103 | 1   | 103 | 100 Bm_ATCC23344_chr2 | 2325379 | 141811 | 141913 | 100 | 515 | 7.70E-19 + |
| BPSS1936 | outer membrane efflux protein                    | 2618540 | 2620066 + | 508 | 53722957 | 3096705 -    | COG1538MU          | CGCGCGCGCGCGCGCGGCTTCTCG   | 2 | 103 | 103 | 24  | 77 Bm_ATCC23344_chr2  | 2325379 | 141642 | 141721 | 98  | 391 | 2.00E-12 - |
| BPSS1940 | sensor kinase/response regulator fusion protein  | 2625634 | 2627469 + | 611 | 53722961 | 3095123 -    | COG0642T           | CGCCTGTGCGCATGCGCGCGCGAT   | 2 | 103 | 103 | 1   | 100 Bm_ATCC23344_chr2 | 2325379 | 134561 | 134663 | 100 | 515 | 7.70E-19 - |
| BPSS1941 | methyl-accepting chemotaxis transducer transmem  | 2627825 | 2629390 - | 521 | 53722962 | 3097053 -    | COG0840NT          | TCGGGTTTAAAGTACGATCGATCG   | 2 | 103 | 1   | 103 | 100 Bm_ATCC23344_chr2 | 2325379 | 130719 | 130821 | 97  | 488 | 1.30E-17 + |
| BPSS1942 | hypothetical protein BPSS1942                    | 2629931 | 2630440 + | 169 | 53722963 | 3097136 -    | NULL               | GAAACGGCGCGCGCTCGCCGCCCT   | 2 | 103 | 103 | 1   | 100 Bm_ATCC23344_chr2 | 2325379 | 130276 | 130378 | 99  | 506 | 2.00E-18 - |
| BPSS1944 | alcohol dehydrogenase                            | 2631078 | 2632103 - | 341 | 53722965 | 3096266 adhA | COG1064R           | CGCAATCGCGCTCGCGCGCGGGCG   | 2 | 103 | 1   | 103 | 100 Bm_ATCC23344_chr2 | 2325379 | 128006 | 128108 | 99  | 506 | 2.00E-18 + |
| BPSS1954 | ATP synthase subunit B                           | 2638096 | 2641861 - | 511 | 53722974 | 3096070 atpD | COG0055C           | CAGCCAGACGGGAGGACGATGGGG   | 2 | 103 | 1   | 103 | 100 Bm_ATCC23344_chr2 | 2325379 | 120487 | 120589 | 99  | 506 | 2.00E-18 - |
| BPSS1959 | permease                                         | 2640073 | 2641936 + | 597 | 53722975 | 3095531 -    | COG3243I           | AGCGGCGACGCGCGCGCTCGCGCT   | 2 | 103 | 103 | 1   | 100 Bm_ATCC23344_chr2 | 2325379 | 120143 | 120245 | 100 | 515 | 7.70E-19 - |
| BPSS1957 | 6-phosphofructokinase                            | 2645187 | 2646128 - | 313 | 53722978 | 3095075 -    | COG1105G           | CGGCGGTGTCGCCCGCGCGACAGAC  | 2 | 103 | 1   | 103 | 100 Bm_ATCC23344_chr2 | 2325379 | 114089 | 114191 | 100 | 515 | 7.70E-19 + |
| BPSS1958 | hypothetical protein BPSS1958                    | 2646621 | 2647268 - | 215 | 53722979 | 3096375 -    | COG2823R           | GGTTCGCGCGCGGTAATGCGCGCAT  | 2 | 103 | 1   | 103 | 100 Bm_ATCC23344_chr2 | 2325379 | 112851 | 112953 | 98  | 497 | 5.00E-18 + |
| BPSS1960 | thymidine phosphorylase                          | 2648584 | 2649906 - | 440 | 53722981 | 3097221 deoA | COG0213F           | CGGTTTCGGAAGCGGATCGCGGCT   | 2 | 103 | 1   | 103 | 100 Bm_ATCC23344_chr2 | 2325379 | 110333 | 110435 | 100 | 515 | 7.70E-19 + |
| BPSS1961 | hypothetical protein BPSS1961                    | 2650594 | 2650773 + | 59  | 53722982 | 3096376 -    | NULL               | CGCGCCCCGGGAAATTCGGCATGC   | 2 | 103 | 103 | 1   | 100 Bm_ATCC23344_chr2 | 2325379 | 109752 | 109854 | 99  | 506 | 2.00E-18 - |
| BPSS1963 | nucleoside transport related membrane protein    | 2651869 | 2653143 + | 424 | 53722984 | 3095752 -    | NULL               | GATGAATAAAGCGCGCGCGCGCAT   | 2 | 103 | 1   | 103 | 100 Bm_ATCC23344_chr2 | 2325379 | 107105 | 107207 | 100 | 515 | 7.70E-19 + |
| BPSS1964 | hypothetical protein BPSS1964                    | 2653661 | 2654914 - | 417 | 53722985 | 3095753 -    | NULL               | GATGTCGGTGATGTCGGCGCGGACA  | 2 | 103 | 1   | 103 | 100 Bm_ATCC23344_chr2 | 2325379 | 105330 | 105432 | 100 | 515 | 7.70E-19 - |
| BPSS1965 | glutathione S-transferase protein                | 2655043 | 2655687 - | 214 | 53722986 | 3095850 -    | COG0625O           | CGCGCGCGACGCGCGCTGTGTGAC   | 2 | 103 | 1   | 103 | 100 Bm_ATCC23344_chr2 | 2325379 | 104557 | 104659 | 100 | 515 | 7.70E-19 + |
| BPSS1966 | LysR-family transcriptional regulator            | 2655961 | 2656866 + | 301 | 53722987 | 3095916 -    | COG0583K           | GGCGGTCCCGCGCGCGACACATGC   | 2 | 103 | 103 | 51  | 50 Bm_ATCC23344_chr2  | 2325379 | 103141 | 103193 | 96  | 247 | 2.10E-06 - |
| BPSS1967 | TetR-family regulatory protein                   | 2657077 | 2657730 - | 217 | 53722988 | 3095917 -    | COG1309K           | GACGGCTCTCCCTAAGGTTGTCTCC  | 2 | 103 | 1   | 103 | 100 Bm_ATCC23344_chr2 | 2325379 | 101274 | 101376 | 100 | 515 | 7.70E-19 + |
| BPSS1968 | dehydrogenase                                    | 2657833 | 2658741 + | 302 | 53722989 | 3096358 -    | COG1028IQ          | CGCTATTGTGACATCGATCAATGTCA | 2 | 103 | 103 | 1   | 100 Bm_ATCC23344_chr2 | 2325379 | 101269 | 101371 | 100 | 515 | 7.70E-19 - |
| BPSS1971 | two component system fusin protein               | 2662056 | 2663579 + | 507 | 53722992 | 3097107 -    | NULL               | CGAATGCTCAAGAAAATGCGCGCT   | 2 | 103 | 103 | 1   | 100 Bm_ATCC23344_chr2 | 2325379 | 97106  | 97208  | 100 | 515 | 7.70E-19 - |
| BPSS1972 | hypothetical protein BPSS1972                    | 2663739 | 2664188 + | 149 | 53722993 | 3097108 -    | NULL               | CCATGCGCGGCAACCGCACCGGAAA  | 2 | 103 | 103 | 1   | 100 Bm_ATCC23344_chr2 | 2325379 | 95360  | 95462  | 100 | 515 | 7.70E-19 - |
| BPSS1973 | sedolisin-B                                      | 2665124 | 2667058 + | 644 | 53722994 | 3095105 -    | COG4934O           | CGCCTCGCGCGATCGGCATGCATC   | 2 | 103 | 103 | 1   | 100 Bm_ATCC23344_chr2 | 2325379 | 93975  | 94077  | 100 | 515 | 7.70E-19 - |
| BPSS1975 | hypothetical protein BPSS1975                    | 2669668 | 2670951 + | 427 | 53722996 | 3097219 -    | COG2020O           | CGCGCAGGCAAGCGCAACCGCGCG   | 2 | 93  | 93  | 1   | 100 Bm_ATCC23344_chr2 | 2325379 | 89311  | 89403  | 100 | 465 | 1.40E-16 - |
| BPSS1976 | hypothetical protein BPSS1976                    | 2671756 | 2673126 + | 456 | 53722997 | 3095868 -    | NULL               | CGCGCGCGCGCGGAACGCGTCCACG  | 2 | 103 | 103 | 1   | 100 Bm_ATCC23344_chr2 | 2325379 | 87211  | 87313  | 100 | 515 | 7.70E-19 - |
| BPSS1978 | EPS transport-related membrane protein kinase    | 2674611 | 2676974 + | 787 | 53722999 | 3095490 -    | COG0489D, COG3206M | CACGAAGCGGATTCGCTCGACGCG   | 2 | 103 | 103 | 1   | 100 Bm_ATCC23344_chr2 | 2325379 | 84356  | 84458  | 100 | 515 | 7.70E-19 - |
| BPSS2098 | hypothetical protein BPSS2098                    | 2839991 | 2840482 - | 163 | 53723112 | 3095171 -    | NULL               | GGCGCAACCGCTCGGGATTGACAT   | 2 | 62  | 1   | 62  | 100 Bm_ATCC23344_chr2 | 2325379 | 397685 | 397746 | 98  | 301 | 3.60E-09 + |
| BPSS2100 | hypothetical protein BPSS2100                    | 2842043 | 2842621 - | 192 |          |              |                    |                            |   |     |     |     |                       |         |        |        |     |     |            |

|          |                                                       |         |           |     |          |               |                            |                            |     |     |     |                       |                       |         |         |         |     |            |            |
|----------|-------------------------------------------------------|---------|-----------|-----|----------|---------------|----------------------------|----------------------------|-----|-----|-----|-----------------------|-----------------------|---------|---------|---------|-----|------------|------------|
| BPSS2134 | hypothetical protein BPSS2134                         | 2891157 | 2891402 + | 81  | 53723150 | 3095193 -     | NULL                       | CCGGTTCGGTTAAACTGCGTTCAAG  | 2   | 103 | 103 | 1                     | 100 Bm_ATCC23344_chr2 | 2325379 | 347019  | 347121  | 99  | 506        | 2.00E-18 - |
| BPSS2135 | DedA family transmembrane protein                     | 2891557 | 2892549 + | 330 | 53723151 | 3095429 -     | COG0586S                   | TCGCTCGGGGCAATGACTCCTTGCC  | 2   | 103 | 103 | 1                     | 100 Bm_ATCC23344_chr2 | 2325379 | 346619  | 346721  | 99  | 506        | 2.00E-18 - |
| BPSS2136 | family S43 non-peptidase homologue                    | 2892881 | 2894323 - | 480 | 53723152 | 3095430 -     | NULL                       | GTCCGCTACGGGCGCGGTGCGGGT   | 2   | 103 | 1   | 103                   | 100 Bm_ATCC23344_chr2 | 2325379 | 343755  | 343857  | 100 | 515        | 7.70E-19 + |
| BPSS2141 | periplasmic oligopeptide-binding protein precursor    | 2898490 | 2900154 - | 554 | 53723157 | 3095325 oppA  | COG4166E                   | TGTCGAAAGAACGTAAAGATGATC   | 2   | 103 | 1   | 103                   | 100 Bm_ATCC23344_chr2 | 2325379 | 337924  | 338026  | 100 | 515        | 7.70E-19 + |
| BPSS2142 | MerR family transcriptional regulator                 | 2900290 | 2900871 - | 193 | 53723158 | 3095015 -     | COG1396K                   | GAGGCGGGCGGCGAGCTCGGAGAC   | 2   | 103 | 1   | 103                   | 100 Bm_ATCC23344_chr2 | 2325379 | 337207  | 337309  | 100 | 515        | 7.70E-19 + |
| BPSS2143 | POT-family proton dependent transporter               | 2901507 | 2903009 + | 500 | 53723159 | 3095016 -     | COG3104E                   | CGCCCGGCGCGGCGCGCGCGCC     | 2   | 103 | 103 | 1                     | 100 Bm_ATCC23344_chr2 | 2325379 | 336669  | 336771  | 99  | 506        | 2.00E-18 - |
| BPSS2144 | hypothetical protein BPSS2144                         | 2903449 | 2903652 + | 67  | 53723160 | 3095149 -     | NULL                       | ACATGTGACTTGCAGCCCAATTCT   | 2   | 103 | 103 | 1                     | 100 Bm_ATCC23344_chr2 | 2325379 | 334728  | 334830  | 100 | 515        | 7.70E-19 + |
| BPSS2146 | LysR family transcriptional regulator                 | 2905720 | 2906661 + | 313 | 53723162 | 3095444 -     | COG0583K                   | ATCCTTTTCGGCGGCGTACGGAAAC  | 2   | 103 | 1   | 103                   | 100 Bm_ATCC23344_chr2 | 2325379 | 331385  | 331487  | 100 | 515        | 7.70E-19 + |
| BPSS2157 | Acyl-CoA transferase/carnitine dehydratase protein    | 2918645 | 2919922 - | 425 | 53723173 | 3095891 -     | COG1804C                   | CGTGAGGACGGCGGCTCGGCGAT    | 2   | 76  | 76  | 1                     | 100 Bm_ATCC23344_chr2 | 2325379 | 2139233 | 2139308 | 100 | 380        | 9.60E-13 - |
| BPSS2158 | LdR family transcriptional regulator                  | 2919996 | 2920745 - | 249 | 53723174 | 3095638 -     | COG1414K                   | TCGTATAATGAAGTAACCTTTCAAA  | 2   | 103 | 103 | 1                     | 100 Bm_ATCC23344_chr2 | 2325379 | 2140056 | 2140158 | 100 | 515        | 7.70E-19 + |
| BPSS2159 | citrate lyase beta chain                              | 2920989 | 2921894 + | 301 | 53723175 | 3095537 -     | COG2301G                   | GTGTGTTTACCAGCACTCCTATTCT  | 2   | 103 | 1   | 103                   | 100 Bm_ATCC23344_chr2 | 2325379 | 2140202 | 2140304 | 100 | 515        | 7.70E-19 + |
| BPSS2160 | outer membrane porin protein                          | 2922210 | 2923289 + | 359 | 53723176 | 3095538 -     | COG3203M                   | CGGCAACGGCTGTAAACGGCTGAA   | 2   | 103 | 1   | 103                   | 100 Bm_ATCC23344_chr2 | 2325379 | 2141423 | 2141525 | 96  | 479        | 3.30E-17 + |
| BPSS2162 | hypothetical protein BPSS2162                         | 2924882 | 2926009 - | 375 | 53723178 | 3095941 -     | COG4645S                   | GGCAATCGCATCCCGCGCGACGGC   | 2   | 103 | 103 | 1                     | 100 Bm_ATCC23344_chr2 | 2325379 | 2145325 | 2145427 | 100 | 515        | 7.70E-19 - |
| BPSS2164 | acylphosphatase protein                               | 2927298 | 2927594 - | 98  | 53723180 | 3095820 -     | COG1254C                   | TGCTCGCCCGGGATCGCGCGCGCG   | 2   | 103 | 103 | 1                     | 100 Bm_ATCC23344_chr2 | 2325379 | 2146911 | 2147013 | 100 | 515        | 7.70E-19 - |
| BPSS2165 | hypothetical protein BPSS2165                         | 2927755 | 2928762 + | 335 | 53723181 | 3095821 -     | COG0451MG                  | TGCTCGATGACAGCCCGCGCGCGCG  | 2   | 103 | 1   | 103                   | 100 Bm_ATCC23344_chr2 | 2325379 | 2146974 | 2147076 | 100 | 515        | 7.70E-19 + |
| BPSS2168 | 4-hydroxy-3-methylbut-2-enyl diphosphate reductase    | 2932395 | 2933336 + | 313 | 53723184 | 3095062 ispH  | NULL                       | CGCCGGCGCCGTTCTCAGCAATTCTA | 2   | 103 | 1   | 103                   | 100 Bm_ATCC23344_chr2 | 2325379 | 2151494 | 2151596 | 100 | 515        | 7.70E-19 - |
| BPSS2170 | hypothetical protein BPSS2170                         | 2934853 | 2935206 + | 117 | 53723186 | 3095750 -     | COG3805Q                   | CGCGCGCGAGACGATGCGCGCGCC   | 2   | 103 | 1   | 103                   | 100 Bm_ATCC23344_chr2 | 2325379 | 2153953 | 2154055 | 100 | 515        | 7.70E-19 + |
| BPSS2171 | glutamate-1-semialdehyde 2,1-aminomutase              | 2935765 | 2937123 + | 452 | 53723187 | 3095751 -     | COG0001H                   | CGCTCGCGATCGCTCAGCGCGGGA   | 2   | 103 | 1   | 103                   | 100 Bm_ATCC23344_chr2 | 2325379 | 2154855 | 2154957 | 98  | 497        | 5.00E-18 + |
| BPSS2240 | hypothetical protein BPSS2240                         | 3013274 | 3013585 - | 103 | 53723258 | 3095638 -     | NULL                       | CGGCTCGCGCGCGGTGGCGCGCGC   | 2   | 103 | 103 | 1                     | 100 Bm_ATCC23344_chr2 | 2325379 | 2162403 | 2162505 | 100 | 515        | 7.70E-19 - |
| BPSS2243 | lipoprotein                                           | 3014799 | 3015290 - | 163 | 53723261 | 3096573 -     | COG2823R                   | GGCCGCGCGACGGTGACGACGGCG   | 2   | 103 | 103 | 1                     | 100 Bm_ATCC23344_chr2 | 2325379 | 2164103 | 2164205 | 100 | 515        | 7.70E-19 - |
| BPSS2244 | transferase                                           | 3015521 | 3016909 + | 462 | 53723262 | 3096716 -     | COG0438M                   | CGCGCGCGCGCGCGCGCGCGCC     | 2   | 103 | 1   | 103                   | 100 Bm_ATCC23344_chr2 | 2325379 | 2164236 | 2164338 | 100 | 515        | 7.70E-19 + |
| BPSS2246 | sensor kinase/response regulator fusion protein       | 3018081 | 3020396 - | 771 | 53723264 | 3095951 -     | COG0642T                   | GGAATGCGCGCTGTCCCGTGGCGA   | 2   | 103 | 103 | 1                     | 100 Bm_ATCC23344_chr2 | 2325379 | 2169212 | 2169314 | 100 | 515        | 7.70E-19 - |
| BPSS2247 | hypothetical protein BPSS2247                         | 3020531 | 3021223 + | 230 | 53723265 | 3096427 -     | NULL                       | CGCGCGCGCGACGCGCGCGCGCC    | 2   | 103 | 1   | 103                   | 100 Bm_ATCC23344_chr2 | 2325379 | 2169246 | 2169348 | 100 | 515        | 7.70E-19 - |
| BPSS2249 | sigma-54 interacting response regulator               | 3022173 | 3023543 - | 456 | 53723267 | 3095235 -     | COG2204T                   | CGCACATCGCGCGGACATCGTTGCG  | 2   | 103 | 103 | 1                     | 100 Bm_ATCC23344_chr2 | 2325379 | 2172356 | 2172458 | 100 | 515        | 7.70E-19 - |
| BPSS2250 | sigma-54 interacting transcriptional regulator        | 3023932 | 3024900 + | 322 | 53723268 | 3095236 -     | COG2204T                   | AACGCCGTTGTTGCGACGCTGTTT   | 2   | 103 | 1   | 103                   | 100 Bm_ATCC23344_chr2 | 2325379 | 2172647 | 2172749 | 99  | 506        | 2.00E-18 - |
| BPSS2257 | short chain dehydrogenase                             | 3032424 | 3033179 - | 251 | 53723275 | 3097173 -     | COG10281QR                 | GCTCGCGCGCGCGCGCGCGCGCA    | 2   | 103 | 103 | 1                     | 100 Bm_ATCC23344_chr2 | 2325379 | 2181998 | 2182100 | 100 | 515        | 7.70E-19 - |
| BPSS2261 | phosphatidylserine decarboxylase                      | 3038859 | 3040160 - | 433 | 53723279 | 3095658 -     | COG06881                   | CGCGACCGGAGCGCGCGCTTCGCT   | 2   | 103 | 103 | 1                     | 100 Bm_ATCC23344_chr2 | 2325379 | 2188791 | 2188893 | 99  | 506        | 2.00E-18 - |
| BPSS2262 | succinate dehydrogenase catalytic subunit             | 3040322 | 3041029 - | 235 | 53723280 | 3095755 sdhB  | COG0479C                   | TCCCGGGCGCGCGCGCTCGCGCGC   | 2   | 85  | 85  | 1                     | 100 Bm_ATCC23344_chr2 | 2325379 | 2189660 | 2189744 | 98  | 416        | 2.30E-14 - |
| BPSS2263 | hypothetical protein BPSS2263                         | 3041112 | 3041357 - | 81  | 53723281 | 3096569 -     | NULL                       | CAGGCATCGCCGCTGCGCGCAGCG   | 2   | 103 | 103 | 1                     | 100 Bm_ATCC23344_chr2 | 2325379 | 2189888 | 2190090 | 99  | 506        | 2.00E-18 - |
| BPSS2264 | dehydrogenase                                         | 3041653 | 3042540 - | 295 | 53723282 | 3096985 -     | COG2084I                   | GTCGCGCAGCGCGCGCGCGCGCC    | 2   | 103 | 103 | 1                     | 100 Bm_ATCC23344_chr2 | 2325379 | 2191195 | 2191297 | 99  | 506        | 2.00E-18 - |
| BPSS2265 | monooxygenase protein                                 | 3042681 | 3044030 - | 449 | 53723283 | 3096986 -     | COG2141C                   | CGCGCGCGTGGCGCGCGCGCTTCC   | 2   | 103 | 103 | 1                     | 100 Bm_ATCC23344_chr2 | 2325379 | 2192685 | 2192787 | 100 | 515        | 7.70E-19 - |
| BPSS2266 | 4'-phosphopantetheinyl transferase superfamily prot   | 3044311 | 3045126 - | 271 | 53723284 | 3095361 -     | COG2091H                   | CGCGTGCGCAGCATCGGCAATGCGA  | 2   | 103 | 103 | 1                     | 100 Bm_ATCC23344_chr2 | 2325379 | 2193781 | 2193883 | 99  | 506        | 2.00E-18 - |
| BPSS2267 | hypothetical protein BPSS2267                         | 3045344 | 3046597 - | 417 | 53723285 | 3096387 -     | NULL                       | GCGCACCGTGGCATCGAGGATGCG   | 2   | 103 | 103 | 1                     | 100 Bm_ATCC23344_chr2 | 2325379 | 2195252 | 2195354 | 100 | 515        | 7.70E-19 - |
| BPSS2269 | transcriptional regulator                             | 3048340 | 3049497 - | 385 | 53723287 | 3095066 -     | COGCAATTTGACCTTCCGCGCTGAGC | 2                          | 103 | 103 | 1   | 100 Bm_ATCC23344_chr2 | 2325379               | 2198137 | 2198239 | 99      | 506 | 2.00E-18 - |            |
| BPSS2273 | 2-oxoisovalerate dehydrogenase alpha subunit          | 3054057 | 3055289 - | 410 | 53723291 | 3096116 bkdA1 | COG1071C                   | TCGCGGCGAATCCGAGTCAAGAAGA  | 2   | 103 | 103 | 1                     | 100 Bm_ATCC23344_chr2 | 2325379 | 2203929 | 2204031 | 100 | 515        | 7.70E-19 - |
| BPSS2274 | hypothetical protein BPSS2274                         | 3056541 | 3056981 + | 146 | 53723292 | 3095607 -     | NULL                       | GCTCATGTGAGCACCAGCGGCAATCA | 2   | 103 | 1   | 103                   | 100 Bm_ATCC23344_chr2 | 2325379 | 2205084 | 2205186 | 100 | 515        | 7.70E-19 + |
| BPSS2275 | hypothetical protein BPSS2275                         | 3057306 | 3058421 - | 371 | 53723293 | 3095815 -     | NULL                       | TCACAGATTTCATTTGGAGAAATCA  | 2   | 103 | 103 | 1                     | 100 Bm_ATCC23344_chr2 | 2325379 | 2207072 | 2207174 | 100 | 515        | 7.70E-19 - |
| BPSS2276 | LysR family regulatory protein                        | 3058719 | 3059654 + | 311 | 53723294 | 3095186 -     | COG0583K                   | CGCGCCACCCGTGCGCGCGCAAGC   | 2   | 103 | 1   | 103                   | 100 Bm_ATCC23344_chr2 | 2325379 | 2207272 | 2207374 | 100 | 515        | 7.70E-19 + |
| BPSS2277 | hypothetical protein BPSS2277                         | 3059829 | 3060260 + | 143 | 53723295 | 3095876 -     | NULL                       | GATCGCGCGCGCGCGGATCGCGCG   | 2   | 103 | 1   | 102                   | 100 Bm_ATCC23344_chr2 | 2325379 | 2208382 | 2208484 | 97  | 482        | 2.40E-17 + |
| BPSS2278 | hypothetical protein BPSS2278                         | 3060560 | 3062218 + | 552 | 53723296 | 3095902 -     | COG2303E                   | AGGCGGTGGCGCGCGCATCGGCAAC  | 2   | 103 | 1   | 103                   | 100 Bm_ATCC23344_chr2 | 2325379 | 2209111 | 2209213 | 99  | 506        | 2.00E-18 + |
| BPSS2279 | fusion protein, pyridine nucleotide-disulphide oxidor | 3062508 | 3064781 - | 757 | 53723297 | 3095903 -     | COG0446R, COG1752R         | CGAGTCGCGCGACGCGCGCGCTCT   | 2   | 103 | 103 | 1                     | 100 Bm_ATCC23344_chr2 | 2325379 | 2213460 | 2213562 | 100 | 515        | 7.70E-19 - |
| BPSS2283 | hypothetical protein BPSS2283                         | 3070172 | 3071881 + | 569 | 53723301 | 3095816 -     | COG0645R, COG2187S         | GACGACGGCGCGCGCGCGCGCGC    | 2   | 103 | 1   | 103                   | 100 Bm_ATCC23344_chr2 | 2325379 | 2218789 | 2218891 | 100 | 515        | 7.70E-19 + |
| BPSS2284 | hypothetical protein BPSS2284                         | 3072406 | 3073437 + | 343 | 53723302 | 3096601 -     | COG0778C                   | TGAAATCGATGCGCGCGCAGCCCGA  | 2   | 103 | 1   | 103                   | 100 Bm_ATCC23344_chr2 | 2325379 | 2221017 | 2221119 | 99  | 506        | 2.00E-18 + |
| BPSS2286 | hypothetical protein BPSS2286                         | 3075738 | 3076256 - | 172 | 53723304 | 3095830 -     | COG0517R                   | GCAGCGCGGGAAGCGGCTTCGGCG   | 2   | 103 | 103 | 1                     | 100 Bm_ATCC23344_chr2 | 2325379 | 2224873 | 2224975 | 100 | 515        | 7.70E-19 - |
| BPSS2287 | hypothetical protein BPSS2287                         | 3076641 | 3077294 + | 217 | 53723305 | 3097094 -     | NULL                       | GATCGCGGATCAGAGCGGCGCGCGC  | 2   | 103 | 1   | 103                   | 100 Bm_ATCC23344_chr2 | 2325379 | 2225160 | 2225262 | 100 | 515        | 7.70E-19 + |
| BPSS2288 | HSP20/alpha crystallin family protein                 | 3077355 | 3077789 - | 144 | 53723306 | 3097095 -     | COG0071O                   | CCGGTCAGCATCATGCATCAACGGK  | 2   | 103 | 103 | 1                     | 100 Bm_ATCC23344_chr2 | 2325379 | 2226413 | 2226515 | 100 | 515        | 7.70E-19 - |
| BPSS2299 | molybdopterine oxidoreductase                         | 3092021 | 3094897 + | 958 | 53723317 | 3095001 -     | COG0243C                   | CGACCAACGTCATCGCTCGTTGCA   | 2   | 103 | 1   | 103                   | 100 Bm_ATCC23344_chr2 | 2325379 | 2239891 | 2239993 | 100 | 515        | 7.70E-19 + |
| BPSS2301 | hypothetical protein BPSS2301                         | 3095766 | 3096716 + | 316 | 53723319 | 3097188 -     | COG3302R                   | GGGGCGCGCGCGCGCGCGCAACAC   | 2   | 60  | 1   | 60                    | 100 Bm_ATCC23344_chr2 | 2325379 | 2243679 | 2243738 | 100 | 300        | 4.00E-09 + |
| BPSS2302 | hypothetical protein BPSS2302                         | 3097926 | 3098816 + | 296 | 53723320 | 3097189 -     | NULL                       | CGCGGAAGCGCAGGTGCGCGCGAGC  | 2   | 103 | 1   | 103                   | 100 Bm_ATCC23344_chr2 | 2325379 | 2245717 | 2245819 | 99  | 506        | 2.00E-18 + |
| BPSS2304 | penicillin-binding protein                            | 3100875 | 3103394 - | 839 | 53723322 | 3096190 -     | COG5009M                   | CACGCGCGCAATCCGCGCTTCCGCG  | 2   | 103 | 103 | 1                     | 100 Bm_ATCC23344_chr2 | 2325379 | 2251271 | 2251373 | 99  | 506        | 2.00E-18 - |
| BPSS2305 | lipoprotein                                           | 3104258 | 3105826 - | 522 | 53723323 | 3096196 -     | NULL                       | AGAACGGAGCGCGCGCGCGCGCG    | 2   | 103 | 103 | 1                     | 100 Bm_ATCC23344_chr2 | 2325379 | 2253537 | 2253639 | 100 | 515        | 7.70E-19 - |
| BPSS2306 | porin protein                                         | 3106526 | 3107698 - | 390 | 53723324 | 3095436 -     | COG3203M                   | TAATCATATCATCGCAGAAATTAAT  | 2   | 103 | 103 | 1                     | 100 Bm_ATCC23344_chr2 | 2325379 | 2255404 | 2255506 | 99  | 506        | 2.00E-18 - |
| BPSS2314 | sensor kinase protein                                 | 3115766 | 3117166 + | 466 | 53723331 | 3095719 -     | COG4564T                   | GCGCGCGCGCGCGCGCGCGCGGGA   | 2   | 103 | 1   | 103                   | 100 Bm_ATCC23344_chr2 | 2325379 | 2263391 | 2263493 | 99  | 506        | 2.00E-18 + |
| BPSS2316 | hypothetical protein BPSS2316                         | 3118004 | 3118600 - | 198 | 53723333 | 3095037 -     | COG2854Q                   |                            |     |     |     |                       |                       |         |         |         |     |            |            |
